# Supplementary material for: Isolation and electronic structures of derivatized manganocene, ferrocene and cobaltocene anions
Source: Springer Nature journal article supplement (doi:10.1038/s41557-020-00595-w), 2020-12-14
Supplement: 41557_2020_595_MOESM16_ESM.cif [file 41557_2020_595_MOESM16_ESM.cif]

data_6

_manchester_internal_coll_name         ldpm46
_manchester_internal_coll_client       CAPG
_manchester_internal_coll_type         custom
_manchester_internal_coll_frame_time   '40s'
_manchester_internal_coll_frame_width  '0.5'
_manchester_internal_coll_frame_method '\w scans'
_manchester_internal_coll_user         CAPG
_manchester_internal_coll_date         24/2/18
_manchester_internal_process_user      CAPG
_manchester_internal_process_date      24/2/18
_manchester_internal_solution_user     CAPG
_manchester_internal_solution_date     2/3/18
_manchester_internal_refinement_user   CAPG
_manchester_internal_refinement_date   8/3/18
_manchester_internal_validation_user   CAPG
_manchester_internal_validation_date   18/6/18
_manchester_internal_archive_date      19/6/18

_refine_special_details
;
Global enhanced rigid bond restraints (RIGU) were applied.
;

_audit_creation_date               2018-06-18
_audit_creation_method
;
Olex2 1.2
(compiled 2018.04.26 svn.r3504 for OlexSys, GUI svn.r5492)
;
_shelx_SHELXL_version_number       '2018/3'
_audit_contact_author_address      ?
_audit_contact_author_email        ?
_audit_contact_author_name         ''
_audit_contact_author_phone        ?
_publ_contact_author_id_orcid      ?
_publ_section_references
;
Dolomanov, O.V., Bourhis, L.J., Gildea, R.J, Howard, J.A.K. & Puschmann, H.
 (2009), J. Appl. Cryst. 42, 339-341.

Sheldrick, G.M. (2015). Acta Cryst. C71, 3-8.
;
_chemical_name_common              ?
_chemical_name_systematic          ?
_chemical_formula_moiety           'C34 H58 Co, C18 H36 K N2 O6'
_chemical_formula_sum              'C52 H94 Co K N2 O6'
_chemical_formula_weight           941.32
_chemical_melting_point            ?
_chemical_oxdiff_formula           Co(C5H2(C4H9)3)2KN2O6C18H36
loop_
  _atom_type_symbol
  _atom_type_description
  _atom_type_scat_dispersion_real
  _atom_type_scat_dispersion_imag
  _atom_type_scat_source
 'C' 'C' 0.0033 0.0016 'International Tables Vol C Tables 4.2.6.8 and 6.1.1.4'
 'H' 'H' 0.0000 0.0000 'International Tables Vol C Tables 4.2.6.8 and 6.1.1.4'
 'Co' 'Co' 0.3494 0.9721 'International Tables Vol C Tables 4.2.6.8 and 6.1.1.4'
 'K' 'K' 0.2009 0.2494 'International Tables Vol C Tables 4.2.6.8 and 6.1.1.4'
 'N' 'N' 0.0061 0.0033 'International Tables Vol C Tables 4.2.6.8 and 6.1.1.4'
 'O' 'O' 0.0106 0.0060 'International Tables Vol C Tables 4.2.6.8 and 6.1.1.4'

_shelx_space_group_comment
;
The symmetry employed for this shelxl refinement is uniquely defined
by the following loop, which should always be used as a source of
symmetry information in preference to the above space-group names.
They are only intended as comments.
;
_space_group_crystal_system        'monoclinic'
_space_group_IT_number             14
_space_group_name_H-M_alt          'P 1 21/c 1'
_space_group_name_Hall             '-P 2ybc'
loop_
  _space_group_symop_operation_xyz
 'x, y, z'
 '-x, y+1/2, -z+1/2'
 '-x, -y, -z'
 'x, -y-1/2, z-1/2'

_cell_length_a                     16.4529(6)
_cell_length_b                     16.3213(7)
_cell_length_c                     20.0312(7)
_cell_angle_alpha                  90
_cell_angle_beta                   92.950(4)
_cell_angle_gamma                  90
_cell_volume                       5371.9(4)
_cell_formula_units_Z              4
_cell_measurement_reflns_used      5272
_cell_measurement_temperature      150(2)
_cell_measurement_theta_max        26.2830
_cell_measurement_theta_min        1.7460
_shelx_estimated_absorpt_T_max     ?
_shelx_estimated_absorpt_T_min     ?
_exptl_absorpt_coefficient_mu      0.443
_exptl_absorpt_correction_T_max    1.000
_exptl_absorpt_correction_T_min    0.822
_exptl_absorpt_correction_type     gaussian
_exptl_absorpt_process_details
;
CrysAlisPro 1.171.39.46 (Rigaku Oxford Diffraction, 2018)
Numerical absorption correction based on gaussian integration over
			a multifaceted crystal model
Empirical absorption correction using spherical harmonics,
 implemented in SCALE3 ABSPACK scaling algorithm.
;
_exptl_absorpt_special_details     ?
_exptl_crystal_colour              'clear brown'
_exptl_crystal_colour_lustre       clear
_exptl_crystal_colour_primary      brown
_exptl_crystal_density_diffrn      1.164
_exptl_crystal_density_meas        ?
_exptl_crystal_density_method      ?
_exptl_crystal_description         block
_exptl_crystal_F_000               2056
loop_
  _exptl_crystal_face_index_h
  _exptl_crystal_face_index_k
  _exptl_crystal_face_index_l
  _exptl_crystal_face_perp_dist
 17 -15 -4 0.0252
 -17 15 4 0.0216
 -13 -17 -10 0.0398
 13 17 10 0.0724
 9 3 -26 0.0324
 3 -16 19 0.0255

_exptl_crystal_preparation         'By CAPG.'
_exptl_crystal_recrystallization_method  'From THF/hexane layering.'
_exptl_crystal_size_max            0.127
_exptl_crystal_size_mid            0.092
_exptl_crystal_size_min            0.047
loop_
  _exptl_oxdiff_crystal_face_indexfrac_h
  _exptl_oxdiff_crystal_face_indexfrac_k
  _exptl_oxdiff_crystal_face_indexfrac_l
  _exptl_oxdiff_crystal_face_x
  _exptl_oxdiff_crystal_face_y
  _exptl_oxdiff_crystal_face_z
 17.0000 -15.0000 -4.0000 0.6998 -0.6958 0.0006
 -17.0000 15.0000 4.0000 -0.6998 0.6958 -0.0006
 -13.0000 -17.0000 -10.0000 0.0765 -0.0807 0.9961
 13.0000 17.0000 10.0000 -0.0765 0.0807 -0.9961
 9.0000 3.0000 -26.0000 -0.4556 -0.8798 -0.0035
 3.0000 -16.0000 19.0000 0.9387 0.2574 0.1286

_exptl_transmission_factor_max     ?
_exptl_transmission_factor_min     ?
_diffrn_reflns_av_R_equivalents    0.1189
_diffrn_reflns_av_unetI/netI       0.1385
_diffrn_reflns_Laue_measured_fraction_full  1.000
_diffrn_reflns_Laue_measured_fraction_max  1.000
_diffrn_reflns_limit_h_max         19
_diffrn_reflns_limit_h_min         -19
_diffrn_reflns_limit_k_max         19
_diffrn_reflns_limit_k_min         -19
_diffrn_reflns_limit_l_max         24
_diffrn_reflns_limit_l_min         -24
_diffrn_reflns_number              27171
_diffrn_reflns_point_group_measured_fraction_full  1.000
_diffrn_reflns_point_group_measured_fraction_max  1.000
_diffrn_reflns_theta_full          25.242
_diffrn_reflns_theta_max           25.350
_diffrn_reflns_theta_min           1.610
_diffrn_ambient_temperature        150.01(10)
_diffrn_detector                   'CCD plate'
_diffrn_detector_area_resol_mean   ?
_diffrn_measured_fraction_theta_full  1.000
_diffrn_measured_fraction_theta_max  1.000
_diffrn_measurement_details
;
List of Runs (angles in degrees, time in seconds):

  # Type    Start    End  Width  t~exp~   \w     \q     \k     \f   Frames
--------------------------------------------------------------------------
  1  \w    -49.00 -23.00   0.50   40.00    --   19.70  48.00-107.00   52
  2  \w    -55.00 -29.00   0.50   40.00    --   19.70  57.00   0.00   52
  3  \w     -7.00  84.00   0.50   40.00    --   19.70  57.00   0.00  182
  4  \w      3.00  28.00   0.50   40.00    --   19.70  60.00  90.00   50
  5  \w     50.00 108.00   0.50   40.00    --   19.70  60.00  90.00  116
  6  \w      3.00 109.00   0.50   40.00    --   19.70  48.00-107.00  212
;
_diffrn_measurement_device         'four-circle diffractometer'
_diffrn_measurement_device_type    'XtaLAB AFC11 (RINC): quarter-chi single'
_diffrn_measurement_method         '\w scans'
_diffrn_orient_matrix_type        
 'CrysAlisPro convention (1999,Acta A55,543-557)'
_diffrn_orient_matrix_UB_11        0.0187460000
_diffrn_orient_matrix_UB_12        -0.0308633000
_diffrn_orient_matrix_UB_13        0.0204528000
_diffrn_orient_matrix_UB_21        -0.0263184000
_diffrn_orient_matrix_UB_22        0.0096690000
_diffrn_orient_matrix_UB_23        0.0258438000
_diffrn_orient_matrix_UB_31        -0.0286280000
_diffrn_orient_matrix_UB_32        -0.0289838000
_diffrn_orient_matrix_UB_33        -0.0131184000
_diffrn_radiation_monochromator    mirror
_diffrn_radiation_probe            x-ray
_diffrn_radiation_type             MoK\a
_diffrn_radiation_wavelength       0.71073
_diffrn_source                     'Rotating-anode X-ray tube (dual wavelength)'
_diffrn_source_type                'Rigaku (Mo) X-ray DW Source'
_reflns_Friedel_coverage           0.000
_reflns_Friedel_fraction_full      .
_reflns_Friedel_fraction_max       .
_reflns_number_gt                  6061
_reflns_number_total               9827
_reflns_odcompleteness_completeness  99.63
_reflns_odcompleteness_iscentric   1
_reflns_odcompleteness_theta       26.32
_reflns_special_details
;
 Reflections were merged by SHELXL according to the crystal
 class for the calculation of statistics and refinement.
 
 _reflns_Friedel_fraction is defined as the number of unique
 Friedel pairs measured divided by the number that would be
 possible theoretically, ignoring centric projections and
 systematic absences.
;
_reflns_threshold_expression       'I > 2\s(I)'
_computing_cell_refinement         'CrysAlisPro 1.171.39.46 (Rigaku OD, 2018)'
_computing_data_collection         'CrysAlisPro 1.171.39.46 (Rigaku OD, 2018)'
_computing_data_reduction          'CrysAlisPro 1.171.39.46 (Rigaku OD, 2018)'
_computing_molecular_graphics      'Olex2 (Dolomanov et al., 2009)'
_computing_publication_material    'Olex2 (Dolomanov et al., 2009)'
_computing_structure_refinement    'ShelXL (Sheldrick, 2015)'
_computing_structure_solution      'SHELXT 2018/2 (Sheldrick, 2018)'
_refine_diff_density_max           0.425
_refine_diff_density_min           -0.444
_refine_diff_density_rms           0.068
_refine_ls_extinction_coef         .
_refine_ls_extinction_method       none
_refine_ls_goodness_of_fit_ref     0.939
_refine_ls_hydrogen_treatment      constr
_refine_ls_matrix_type             full
_refine_ls_number_parameters       559
_refine_ls_number_reflns           9827
_refine_ls_number_restraints       690
_refine_ls_R_factor_all            0.1080
_refine_ls_R_factor_gt             0.0546
_refine_ls_restrained_S_all        0.908
_refine_ls_shift/su_max            0.001
_refine_ls_shift/su_mean           0.000
_refine_ls_structure_factor_coef   Fsqd
_refine_ls_weighting_details      
 'w=1/[\s^2^(Fo^2^)+(0.0341P)^2^] where P=(Fo^2^+2Fc^2^)/3'
_refine_ls_weighting_scheme        calc
_refine_ls_wR_factor_gt            0.1116
_refine_ls_wR_factor_ref           0.1274

_olex2_refinement_description
;
1. Fixed Uiso
 At 1.2 times of:
  All C(H) groups, All C(H,H) groups
 At 1.5 times of:
  All C(H,H,H) groups
2. Rigid body (RIGU) restrains
 All non-hydrogen atoms
 with sigma for 1-2 distances of 0.004 and sigma for 1-3 distances of 0.004
3.a Ternary CH refined with riding coordinates:
 C2(H2), C5(H5), C19(H19), C22(H22)
3.b Secondary CH2 refined with riding coordinates:
 C35(H35A,H35B), C36(H36A,H36B), C37(H37A,H37B), C38(H38A,H38B), C39(H39A,
 H39B), C40(H40A,H40B), C41(H41A,H41B), C42(H42A,H42B), C43(H43A,H43B),
 C44(H44A,H44B), C45(H45A,H45B), C46(H46A,H46B), C47(H47A,H47B), C48(H48A,H48B),
  C49(H49A,H49B), C50(H50A,H50B), C51(H51A,H51B), C52(H52A,H52B)
3.c Me refined with riding coordinates:
 C7(H7A,H7B,H7C), C8(H8A,H8B,H8C), C9(H9A,H9B,H9C), C11(H11A,H11B,H11C),
 C12(H12A,H12B,H12C), C13(H13A,H13B,H13C), C15(H15A,H15B,H15C), C16(H16A,H16B,
 H16C), C17(H17A,H17B,H17C), C24(H24A,H24B,H24C), C25(H25A,H25B,H25C), C26(H26A,
 H26B,H26C), C28(H28A,H28B,H28C), C29(H29A,H29B,H29C), C30(H30A,H30B,H30C),
 C32(H32A,H32B,H32C), C33(H33A,H33B,H33C), C34(H34A,H34B,H34C)
;
_atom_sites_solution_hydrogens     geom
_atom_sites_solution_primary       ?
_atom_sites_solution_secondary     ?
loop_
  _atom_site_label
  _atom_site_type_symbol
  _atom_site_fract_x
  _atom_site_fract_y
  _atom_site_fract_z
  _atom_site_U_iso_or_equiv
  _atom_site_adp_type
  _atom_site_occupancy
  _atom_site_site_symmetry_order
  _atom_site_calc_flag
  _atom_site_refinement_flags_posn
  _atom_site_refinement_flags_adp
  _atom_site_refinement_flags_occupancy
  _atom_site_disorder_assembly
  _atom_site_disorder_group
 Co1 Co 0.24816(2) 0.72926(3) 0.34179(2) 0.02071(12) Uani 1 1 d . U . . .
 C1 C 0.34106(16) 0.62815(18) 0.37710(15) 0.0218(7) Uani 1 1 d . U . . .
 C2 C 0.30808(16) 0.61304(18) 0.31216(15) 0.0217(7) Uani 1 1 d . U . . .
 H2 H 0.340793 0.606504 0.271782 0.026 Uiso 1 1 calc R . . . .
 C3 C 0.22178(16) 0.59873(18) 0.31344(14) 0.0202(7) Uani 1 1 d . U . . .
 C4 C 0.20083(16) 0.60825(19) 0.38289(15) 0.0216(7) Uani 1 1 d . U . . .
 C5 C 0.27590(16) 0.62667(19) 0.41965(15) 0.0238(7) Uani 1 1 d . U . . .
 H5 H 0.281279 0.635438 0.469091 0.029 Uiso 1 1 calc R . . . .
 C6 C 0.43198(16) 0.63237(19) 0.39735(15) 0.0236(7) Uani 1 1 d . U . . .
 C7 C 0.47275(18) 0.7004(2) 0.35894(17) 0.0357(9) Uani 1 1 d . U . . .
 H7A H 0.463950 0.690823 0.310814 0.054 Uiso 1 1 calc R . . . .
 H7B H 0.449196 0.753378 0.370509 0.054 Uiso 1 1 calc R . . . .
 H7C H 0.531273 0.700734 0.370825 0.054 Uiso 1 1 calc R . . . .
 C8 C 0.44590(18) 0.6477(2) 0.47213(16) 0.0360(9) Uani 1 1 d . U . . .
 H8A H 0.419811 0.604109 0.497016 0.054 Uiso 1 1 calc R . . . .
 H8B H 0.504459 0.648060 0.483885 0.054 Uiso 1 1 calc R . . . .
 H8C H 0.422381 0.700704 0.483569 0.054 Uiso 1 1 calc R . . . .
 C9 C 0.47428(17) 0.5511(2) 0.38077(19) 0.0429(10) Uani 1 1 d . U . . .
 H9A H 0.466235 0.539809 0.332843 0.064 Uiso 1 1 calc R . . . .
 H9B H 0.532649 0.555438 0.392683 0.064 Uiso 1 1 calc R . . . .
 H9C H 0.450860 0.506475 0.406260 0.064 Uiso 1 1 calc R . . . .
 C10 C 0.17666(16) 0.5593(2) 0.25193(15) 0.0233(7) Uani 1 1 d . U . . .
 C11 C 0.21882(18) 0.5827(2) 0.18769(14) 0.0325(8) Uani 1 1 d . U . . .
 H11A H 0.217460 0.642304 0.182052 0.049 Uiso 1 1 calc R . . . .
 H11B H 0.275488 0.563964 0.191046 0.049 Uiso 1 1 calc R . . . .
 H11C H 0.190344 0.556588 0.149122 0.049 Uiso 1 1 calc R . . . .
 C12 C 0.08600(16) 0.5828(2) 0.24071(16) 0.0338(9) Uani 1 1 d . U . . .
 H12A H 0.081078 0.642478 0.236860 0.051 Uiso 1 1 calc R . . . .
 H12B H 0.063680 0.557102 0.199520 0.051 Uiso 1 1 calc R . . . .
 H12C H 0.055757 0.563738 0.278629 0.051 Uiso 1 1 calc R . . . .
 C13 C 0.18099(18) 0.4656(2) 0.25760(15) 0.0294(8) Uani 1 1 d . U . . .
 H13A H 0.154738 0.447946 0.297992 0.044 Uiso 1 1 calc R . . . .
 H13B H 0.152936 0.440834 0.218248 0.044 Uiso 1 1 calc R . . . .
 H13C H 0.238080 0.448210 0.260173 0.044 Uiso 1 1 calc R . . . .
 C14 C 0.12176(17) 0.5952(2) 0.41906(15) 0.0271(8) Uani 1 1 d . U . . .
 C15 C 0.05318(17) 0.6549(2) 0.39637(16) 0.0351(9) Uani 1 1 d . U . . .
 H15A H 0.004636 0.643433 0.421177 0.053 Uiso 1 1 calc R . . . .
 H15B H 0.071034 0.711322 0.405101 0.053 Uiso 1 1 calc R . . . .
 H15C H 0.040255 0.647817 0.348411 0.053 Uiso 1 1 calc R . . . .
 C16 C 0.13600(19) 0.6101(2) 0.49494(16) 0.0351(9) Uani 1 1 d . U . . .
 H16A H 0.084979 0.601522 0.517126 0.053 Uiso 1 1 calc R . . . .
 H16B H 0.177318 0.571858 0.513187 0.053 Uiso 1 1 calc R . . . .
 H16C H 0.154742 0.666507 0.502624 0.053 Uiso 1 1 calc R . . . .
 C17 C 0.08993(17) 0.5067(2) 0.41320(16) 0.0304(8) Uani 1 1 d . U . . .
 H17A H 0.039625 0.501750 0.437041 0.046 Uiso 1 1 calc R . . . .
 H17B H 0.078971 0.492992 0.365971 0.046 Uiso 1 1 calc R . . . .
 H17C H 0.130930 0.469072 0.432870 0.046 Uiso 1 1 calc R . . . .
 C18 C 0.23634(16) 0.85208(19) 0.38797(14) 0.0199(7) Uani 1 1 d . U . . .
 C19 C 0.30245(16) 0.85460(18) 0.34521(14) 0.0204(7) Uani 1 1 d . U . . .
 H19 H 0.359965 0.866709 0.360648 0.024 Uiso 1 1 calc R . . . .
 C20 C 0.27434(16) 0.85015(19) 0.27653(14) 0.0206(7) Uani 1 1 d . U . . .
 C21 C 0.18621(16) 0.8424(2) 0.27675(15) 0.0237(7) Uani 1 1 d . U . . .
 C22 C 0.16565(17) 0.84264(19) 0.34487(14) 0.0217(7) Uani 1 1 d . U . . .
 H22 H 0.108721 0.842142 0.360113 0.026 Uiso 1 1 calc R . . . .
 C23 C 0.23742(16) 0.87591(19) 0.46183(15) 0.0228(7) Uani 1 1 d . U . . .
 C24 C 0.29997(18) 0.8254(2) 0.50355(15) 0.0299(8) Uani 1 1 d . U . . .
 H24A H 0.299218 0.842067 0.550521 0.045 Uiso 1 1 calc R . . . .
 H24B H 0.286349 0.767117 0.499559 0.045 Uiso 1 1 calc R . . . .
 H24C H 0.354345 0.834802 0.487254 0.045 Uiso 1 1 calc R . . . .
 C25 C 0.15373(17) 0.8636(2) 0.49010(15) 0.0346(9) Uani 1 1 d . U . . .
 H25A H 0.156013 0.879278 0.537385 0.052 Uiso 1 1 calc R . . . .
 H25B H 0.113609 0.897795 0.465270 0.052 Uiso 1 1 calc R . . . .
 H25C H 0.137915 0.805897 0.485753 0.052 Uiso 1 1 calc R . . . .
 C26 C 0.26073(19) 0.9663(2) 0.46939(16) 0.0339(8) Uani 1 1 d . U . . .
 H26A H 0.261460 0.981672 0.516704 0.051 Uiso 1 1 calc R . . . .
 H26B H 0.314841 0.975017 0.452357 0.051 Uiso 1 1 calc R . . . .
 H26C H 0.220836 1.000078 0.443942 0.051 Uiso 1 1 calc R . . . .
 C27 C 0.33351(17) 0.85861(19) 0.21940(15) 0.0228(7) Uani 1 1 d . U . . .
 C28 C 0.34525(18) 0.7777(2) 0.18175(15) 0.0292(8) Uani 1 1 d . U . . .
 H28A H 0.361298 0.734477 0.213767 0.044 Uiso 1 1 calc R . . . .
 H28B H 0.294108 0.762354 0.157737 0.044 Uiso 1 1 calc R . . . .
 H28C H 0.387842 0.784606 0.149771 0.044 Uiso 1 1 calc R . . . .
 C29 C 0.41871(17) 0.8851(2) 0.24760(16) 0.0287(8) Uani 1 1 d . U . . .
 H29A H 0.438850 0.845261 0.281124 0.043 Uiso 1 1 calc R . . . .
 H29B H 0.456206 0.887525 0.211188 0.043 Uiso 1 1 calc R . . . .
 H29C H 0.415087 0.939246 0.268349 0.043 Uiso 1 1 calc R . . . .
 C30 C 0.30845(18) 0.9249(2) 0.16793(16) 0.0344(9) Uani 1 1 d . U . . .
 H30A H 0.300640 0.977079 0.190946 0.052 Uiso 1 1 calc R . . . .
 H30B H 0.351222 0.931083 0.136017 0.052 Uiso 1 1 calc R . . . .
 H30C H 0.257488 0.908831 0.143982 0.052 Uiso 1 1 calc R . . . .
 C31 C 0.11742(17) 0.8494(2) 0.22123(15) 0.0278(8) Uani 1 1 d . U . . .
 C32 C 0.03511(16) 0.8225(2) 0.24839(16) 0.0356(9) Uani 1 1 d . U . . .
 H32A H 0.024816 0.853815 0.288820 0.053 Uiso 1 1 calc R . . . .
 H32B H -0.008717 0.832647 0.214405 0.053 Uiso 1 1 calc R . . . .
 H32C H 0.037159 0.763906 0.259118 0.053 Uiso 1 1 calc R . . . .
 C33 C 0.12961(19) 0.7985(2) 0.15863(15) 0.0337(9) Uani 1 1 d . U . . .
 H33A H 0.181267 0.813688 0.139716 0.051 Uiso 1 1 calc R . . . .
 H33B H 0.130627 0.740220 0.170345 0.051 Uiso 1 1 calc R . . . .
 H33C H 0.084751 0.808961 0.125633 0.051 Uiso 1 1 calc R . . . .
 C34 C 0.10571(18) 0.9408(2) 0.20167(17) 0.0366(9) Uani 1 1 d . U . . .
 H34A H 0.097902 0.973343 0.241934 0.055 Uiso 1 1 calc R . . . .
 H34B H 0.154017 0.960368 0.179869 0.055 Uiso 1 1 calc R . . . .
 H34C H 0.057817 0.946305 0.170841 0.055 Uiso 1 1 calc R . . . .
 K1 K 0.71209(4) 0.79944(4) 0.53885(3) 0.02473(18) Uani 1 1 d . U . . .
 O1 O 0.64601(12) 0.66339(13) 0.60751(10) 0.0293(5) Uani 1 1 d . U . . .
 O2 O 0.74051(13) 0.63999(13) 0.49304(11) 0.0324(6) Uani 1 1 d . U . . .
 O3 O 0.79547(12) 0.86174(14) 0.65230(11) 0.0349(6) Uani 1 1 d . U . . .
 O4 O 0.87815(12) 0.84675(15) 0.53460(11) 0.0381(6) Uani 1 1 d . U . . .
 O5 O 0.56599(11) 0.89615(13) 0.53297(10) 0.0287(5) Uani 1 1 d . U . . .
 O6 O 0.64316(12) 0.85245(14) 0.41498(10) 0.0312(6) Uani 1 1 d . U . . .
 N1 N 0.62286(14) 0.82848(16) 0.66582(13) 0.0277(6) Uani 1 1 d . U . . .
 N2 N 0.80238(14) 0.76784(17) 0.41204(13) 0.0297(6) Uani 1 1 d . U . . .
 C35 C 0.58595(19) 0.7510(2) 0.68654(17) 0.0354(8) Uani 1 1 d . U . . .
 H35A H 0.533924 0.742746 0.660317 0.042 Uiso 1 1 calc R . . . .
 H35B H 0.573498 0.754931 0.734258 0.042 Uiso 1 1 calc R . . . .
 C36 C 0.63996(19) 0.6775(2) 0.67714(15) 0.0303(8) Uani 1 1 d . U . . .
 H36A H 0.694683 0.687664 0.698398 0.036 Uiso 1 1 calc R . . . .
 H36B H 0.616604 0.628698 0.698434 0.036 Uiso 1 1 calc R . . . .
 C37 C 0.69534(19) 0.5929(2) 0.59594(15) 0.0303(8) Uani 1 1 d . U . . .
 H37A H 0.673649 0.544652 0.619175 0.036 Uiso 1 1 calc R . . . .
 H37B H 0.751814 0.602643 0.613600 0.036 Uiso 1 1 calc R . . . .
 C38 C 0.69447(19) 0.5771(2) 0.52255(16) 0.0315(8) Uani 1 1 d . U . . .
 H38A H 0.718677 0.522895 0.513836 0.038 Uiso 1 1 calc R . . . .
 H38B H 0.637832 0.577540 0.503294 0.038 Uiso 1 1 calc R . . . .
 C39 C 0.7522(2) 0.6264(2) 0.42413(16) 0.0347(8) Uani 1 1 d . U . . .
 H39A H 0.701786 0.639812 0.397195 0.042 Uiso 1 1 calc R . . . .
 H39B H 0.765652 0.568131 0.416450 0.042 Uiso 1 1 calc R . . . .
 C40 C 0.8205(2) 0.6802(2) 0.40413(18) 0.0389(9) Uani 1 1 d . U . . .
 H40A H 0.870264 0.666348 0.431770 0.047 Uiso 1 1 calc R . . . .
 H40B H 0.831605 0.669169 0.356843 0.047 Uiso 1 1 calc R . . . .
 C41 C 0.6810(2) 0.8577(2) 0.71927(16) 0.0367(9) Uani 1 1 d . U . . .
 H41A H 0.705265 0.809607 0.742858 0.044 Uiso 1 1 calc R . . . .
 H41B H 0.650692 0.889399 0.752034 0.044 Uiso 1 1 calc R . . . .
 C42 C 0.74834(19) 0.9102(2) 0.69517(16) 0.0354(9) Uani 1 1 d . U . . .
 H42A H 0.725400 0.958209 0.670507 0.042 Uiso 1 1 calc R . . . .
 H42B H 0.782945 0.930318 0.733639 0.042 Uiso 1 1 calc R . . . .
 C43 C 0.87619(18) 0.8920(2) 0.64728(17) 0.0428(10) Uani 1 1 d . U . . .
 H43A H 0.905667 0.890136 0.691607 0.051 Uiso 1 1 calc R . . . .
 H43B H 0.874612 0.949559 0.631728 0.051 Uiso 1 1 calc R . . . .
 C44 C 0.91876(19) 0.8399(3) 0.59881(17) 0.0449(10) Uani 1 1 d . U . . .
 H44A H 0.975999 0.857955 0.596587 0.054 Uiso 1 1 calc R . . . .
 H44B H 0.918673 0.782061 0.613699 0.054 Uiso 1 1 calc R . . . .
 C45 C 0.92308(19) 0.8082(3) 0.48393(18) 0.0490(11) Uani 1 1 d . U . . .
 H45A H 0.931076 0.749495 0.494714 0.059 Uiso 1 1 calc R . . . .
 H45B H 0.977293 0.834191 0.482039 0.059 Uiso 1 1 calc R . . . .
 C46 C 0.87736(19) 0.8168(2) 0.41760(17) 0.0421(10) Uani 1 1 d . U . . .
 H46A H 0.863339 0.875164 0.410252 0.051 Uiso 1 1 calc R . . . .
 H46B H 0.913263 0.799838 0.381896 0.051 Uiso 1 1 calc R . . . .
 C47 C 0.55970(19) 0.8907(2) 0.65132(17) 0.0351(9) Uani 1 1 d . U . . .
 H47A H 0.585581 0.945471 0.650945 0.042 Uiso 1 1 calc R . . . .
 H47B H 0.520983 0.890298 0.687552 0.042 Uiso 1 1 calc R . . . .
 C48 C 0.51350(18) 0.8771(2) 0.58568(16) 0.0336(8) Uani 1 1 d . U . . .
 H48A H 0.495406 0.819401 0.582021 0.040 Uiso 1 1 calc R . . . .
 H48B H 0.464763 0.912789 0.582471 0.040 Uiso 1 1 calc R . . . .
 C49 C 0.52455(18) 0.8919(2) 0.46898(16) 0.0333(8) Uani 1 1 d . U . . .
 H49A H 0.477992 0.930400 0.466942 0.040 Uiso 1 1 calc R . . . .
 H49B H 0.503278 0.835813 0.460979 0.040 Uiso 1 1 calc R . . . .
 C50 C 0.58229(18) 0.9136(2) 0.41699(16) 0.0334(8) Uani 1 1 d . U . . .
 H50A H 0.552685 0.917805 0.372827 0.040 Uiso 1 1 calc R . . . .
 H50B H 0.607709 0.967376 0.427574 0.040 Uiso 1 1 calc R . . . .
 C51 C 0.7018(2) 0.8714(2) 0.36741(16) 0.0350(9) Uani 1 1 d . U . . .
 H51A H 0.738440 0.915300 0.384924 0.042 Uiso 1 1 calc R . . . .
 H51B H 0.674022 0.890859 0.325335 0.042 Uiso 1 1 calc R . . . .
 C52 C 0.7502(2) 0.7952(2) 0.35427(16) 0.0324(8) Uani 1 1 d . U . . .
 H52A H 0.712082 0.750392 0.341052 0.039 Uiso 1 1 calc R . . . .
 H52B H 0.784827 0.805654 0.316200 0.039 Uiso 1 1 calc R . . . .

loop_
  _atom_site_aniso_label
  _atom_site_aniso_U_11
  _atom_site_aniso_U_22
  _atom_site_aniso_U_33
  _atom_site_aniso_U_23
  _atom_site_aniso_U_13
  _atom_site_aniso_U_12
 Co1 0.0168(2) 0.0273(3) 0.0177(2) -0.0032(2) -0.00226(17) 0.00064(18)
 C1 0.0154(14) 0.0240(19) 0.0256(17) 0.0012(14) -0.0025(13) 0.0004(12)
 C2 0.0180(14) 0.0286(19) 0.0186(16) 0.0023(14) 0.0021(13) 0.0015(13)
 C3 0.0181(14) 0.0218(18) 0.0203(15) -0.0012(14) -0.0045(13) 0.0024(13)
 C4 0.0182(14) 0.0272(19) 0.0194(15) -0.0023(14) 0.0010(12) 0.0015(13)
 C5 0.0201(15) 0.034(2) 0.0171(16) -0.0025(15) -0.0013(13) 0.0027(14)
 C6 0.0151(14) 0.0272(19) 0.0281(17) 0.0015(15) -0.0012(14) 0.0019(13)
 C7 0.0231(17) 0.043(2) 0.040(2) -0.0004(18) -0.0062(16) -0.0037(15)
 C8 0.0217(16) 0.054(3) 0.0309(18) -0.0024(18) -0.0098(15) 0.0042(16)
 C9 0.0233(17) 0.043(2) 0.061(3) -0.007(2) -0.0077(18) 0.0068(16)
 C10 0.0194(15) 0.031(2) 0.0190(16) -0.0015(15) -0.0036(13) 0.0020(13)
 C11 0.0353(18) 0.044(2) 0.0181(16) -0.0014(16) -0.0033(15) -0.0019(16)
 C12 0.0241(16) 0.045(2) 0.0305(19) -0.0035(18) -0.0116(15) 0.0006(15)
 C13 0.0324(17) 0.036(2) 0.0196(17) -0.0061(15) -0.0028(15) 0.0005(15)
 C14 0.0215(15) 0.036(2) 0.0239(17) -0.0053(16) 0.0021(14) -0.0018(14)
 C15 0.0204(16) 0.051(2) 0.034(2) -0.0081(19) 0.0034(15) 0.0010(16)
 C16 0.0283(17) 0.051(2) 0.0269(18) -0.0058(18) 0.0089(15) -0.0050(16)
 C17 0.0238(16) 0.039(2) 0.0289(18) -0.0038(17) 0.0045(15) -0.0064(15)
 C18 0.0172(14) 0.0270(19) 0.0150(14) -0.0020(14) -0.0035(12) 0.0026(13)
 C19 0.0169(14) 0.0254(18) 0.0185(15) -0.0010(14) -0.0030(13) 0.0006(13)
 C20 0.0210(14) 0.0227(18) 0.0179(15) -0.0038(14) -0.0021(13) 0.0040(13)
 C21 0.0184(14) 0.034(2) 0.0184(16) -0.0037(15) -0.0056(13) 0.0050(14)
 C22 0.0155(14) 0.0310(19) 0.0182(15) -0.0033(15) -0.0019(13) 0.0017(13)
 C23 0.0174(15) 0.032(2) 0.0185(16) -0.0033(15) -0.0022(13) 0.0019(13)
 C24 0.0350(18) 0.039(2) 0.0152(16) -0.0007(15) -0.0082(15) 0.0009(15)
 C25 0.0286(17) 0.055(3) 0.0201(17) -0.0118(17) 0.0025(15) -0.0057(16)
 C26 0.0431(19) 0.034(2) 0.0244(18) -0.0048(16) -0.0033(16) 0.0006(16)
 C27 0.0229(15) 0.0257(19) 0.0196(16) -0.0008(14) -0.0002(13) 0.0002(13)
 C28 0.0322(17) 0.033(2) 0.0228(17) -0.0014(16) 0.0041(15) -0.0004(15)
 C29 0.0284(17) 0.033(2) 0.0247(17) 0.0012(16) 0.0024(15) -0.0040(15)
 C30 0.0355(18) 0.041(2) 0.0269(18) 0.0079(17) 0.0016(16) 0.0021(16)
 C31 0.0257(16) 0.035(2) 0.0211(17) -0.0025(15) -0.0105(14) 0.0046(15)
 C32 0.0201(16) 0.056(3) 0.0294(19) -0.0068(18) -0.0102(15) 0.0012(16)
 C33 0.0378(19) 0.045(2) 0.0175(16) -0.0046(16) -0.0088(15) 0.0048(16)
 C34 0.0299(18) 0.039(2) 0.039(2) -0.0015(18) -0.0141(16) 0.0057(16)
 K1 0.0213(3) 0.0310(4) 0.0216(4) 0.0005(3) -0.0025(3) 0.0006(3)
 O1 0.0322(12) 0.0303(14) 0.0252(12) 0.0047(11) -0.0007(10) 0.0049(10)
 O2 0.0420(13) 0.0305(14) 0.0248(12) -0.0023(11) 0.0033(11) -0.0022(11)
 O3 0.0271(12) 0.0464(16) 0.0306(13) -0.0108(12) -0.0032(10) -0.0005(11)
 O4 0.0207(11) 0.0607(17) 0.0325(13) -0.0111(13) -0.0021(10) 0.0013(11)
 O5 0.0221(11) 0.0350(14) 0.0283(12) 0.0005(11) -0.0051(10) 0.0003(10)
 O6 0.0318(12) 0.0375(15) 0.0240(12) 0.0061(11) -0.0009(10) 0.0046(10)
 N1 0.0277(14) 0.0325(17) 0.0230(14) -0.0003(13) 0.0013(12) -0.0027(12)
 N2 0.0251(14) 0.0392(17) 0.0247(15) -0.0013(14) -0.0005(12) 0.0011(12)
 C35 0.0350(19) 0.042(2) 0.0301(19) -0.0001(17) 0.0082(16) 0.0001(16)
 C36 0.0332(18) 0.033(2) 0.0246(17) 0.0032(16) 0.0055(15) -0.0030(15)
 C37 0.0325(18) 0.030(2) 0.0281(18) 0.0050(16) -0.0024(15) 0.0008(15)
 C38 0.0365(18) 0.028(2) 0.0299(18) -0.0012(16) -0.0002(16) 0.0020(16)
 C39 0.048(2) 0.030(2) 0.0257(18) -0.0051(16) 0.0023(17) 0.0063(16)
 C40 0.040(2) 0.046(2) 0.031(2) -0.0053(18) 0.0045(17) 0.0107(17)
 C41 0.045(2) 0.042(2) 0.0232(18) -0.0015(17) -0.0010(16) -0.0028(17)
 C42 0.0381(19) 0.043(2) 0.0248(18) -0.0073(17) -0.0015(16) -0.0006(16)
 C43 0.0237(17) 0.068(3) 0.035(2) -0.012(2) -0.0092(16) -0.0021(17)
 C44 0.0236(18) 0.070(3) 0.040(2) -0.015(2) -0.0108(16) 0.0018(18)
 C45 0.0195(18) 0.082(3) 0.046(2) -0.021(2) 0.0060(17) -0.0027(18)
 C46 0.0331(19) 0.063(3) 0.032(2) -0.008(2) 0.0136(16) -0.0103(18)
 C47 0.0336(18) 0.036(2) 0.036(2) -0.0009(18) 0.0092(16) 0.0043(16)
 C48 0.0220(17) 0.038(2) 0.041(2) 0.0033(18) 0.0033(15) 0.0055(15)
 C49 0.0230(17) 0.040(2) 0.0356(19) -0.0020(18) -0.0126(15) 0.0037(15)
 C50 0.0339(18) 0.035(2) 0.0302(18) 0.0036(17) -0.0127(15) 0.0072(16)
 C51 0.044(2) 0.042(2) 0.0186(17) 0.0094(17) 0.0015(16) 0.0001(17)
 C52 0.0412(19) 0.035(2) 0.0209(17) -0.0008(16) -0.0006(15) -0.0038(16)

_geom_special_details
;
 All esds (except the esd in the dihedral angle between two l.s. planes)
 are estimated using the full covariance matrix.  The cell esds are taken
 into account individually in the estimation of esds in distances, angles
 and torsion angles; correlations between esds in cell parameters are only
 used when they are defined by crystal symmetry.  An approximate (isotropic)
 treatment of cell esds is used for estimating esds involving l.s. planes.
;
loop_
  _geom_bond_atom_site_label_1
  _geom_bond_atom_site_label_2
  _geom_bond_distance
  _geom_bond_site_symmetry_2
  _geom_bond_publ_flag
 Co1 C1 2.334(3) . ?
 Co1 C2 2.232(3) . ?
 Co1 C3 2.241(3) . ?
 Co1 C4 2.291(3) . ?
 Co1 C5 2.318(3) . ?
 Co1 C18 2.220(3) . ?
 Co1 C19 2.232(3) . ?
 Co1 C20 2.418(3) . ?
 Co1 C21 2.451(3) . ?
 Co1 C22 2.298(3) . ?
 C1 C2 1.405(4) . ?
 C1 C5 1.404(4) . ?
 C1 C6 1.531(4) . ?
 C2 H2 1.0000 . ?
 C2 C3 1.441(4) . ?
 C3 C4 1.459(4) . ?
 C3 C10 1.546(4) . ?
 C4 C5 1.437(4) . ?
 C4 C14 1.536(4) . ?
 C5 H5 1.0000 . ?
 C6 C7 1.526(4) . ?
 C6 C8 1.524(4) . ?
 C6 C9 1.542(4) . ?
 C7 H7A 0.9800 . ?
 C7 H7B 0.9800 . ?
 C7 H7C 0.9800 . ?
 C8 H8A 0.9800 . ?
 C8 H8B 0.9800 . ?
 C8 H8C 0.9800 . ?
 C9 H9A 0.9800 . ?
 C9 H9B 0.9800 . ?
 C9 H9C 0.9800 . ?
 C10 C11 1.541(4) . ?
 C10 C12 1.545(4) . ?
 C10 C13 1.535(4) . ?
 C11 H11A 0.9800 . ?
 C11 H11B 0.9800 . ?
 C11 H11C 0.9800 . ?
 C12 H12A 0.9800 . ?
 C12 H12B 0.9800 . ?
 C12 H12C 0.9800 . ?
 C13 H13A 0.9800 . ?
 C13 H13B 0.9800 . ?
 C13 H13C 0.9800 . ?
 C14 C15 1.542(4) . ?
 C14 C16 1.545(4) . ?
 C14 C17 1.538(4) . ?
 C15 H15A 0.9800 . ?
 C15 H15B 0.9800 . ?
 C15 H15C 0.9800 . ?
 C16 H16A 0.9800 . ?
 C16 H16B 0.9800 . ?
 C16 H16C 0.9800 . ?
 C17 H17A 0.9800 . ?
 C17 H17B 0.9800 . ?
 C17 H17C 0.9800 . ?
 C18 C19 1.419(4) . ?
 C18 C22 1.421(3) . ?
 C18 C23 1.529(4) . ?
 C19 H19 1.0000 . ?
 C19 C20 1.430(4) . ?
 C20 C21 1.456(4) . ?
 C20 C27 1.546(4) . ?
 C21 C22 1.423(4) . ?
 C21 C31 1.550(4) . ?
 C22 H22 1.0000 . ?
 C23 C24 1.532(4) . ?
 C23 C25 1.529(4) . ?
 C23 C26 1.530(4) . ?
 C24 H24A 0.9800 . ?
 C24 H24B 0.9800 . ?
 C24 H24C 0.9800 . ?
 C25 H25A 0.9800 . ?
 C25 H25B 0.9800 . ?
 C25 H25C 0.9800 . ?
 C26 H26A 0.9800 . ?
 C26 H26B 0.9800 . ?
 C26 H26C 0.9800 . ?
 C27 C28 1.538(4) . ?
 C27 C29 1.546(4) . ?
 C27 C30 1.536(4) . ?
 C28 H28A 0.9800 . ?
 C28 H28B 0.9800 . ?
 C28 H28C 0.9800 . ?
 C29 H29A 0.9800 . ?
 C29 H29B 0.9800 . ?
 C29 H29C 0.9800 . ?
 C30 H30A 0.9800 . ?
 C30 H30B 0.9800 . ?
 C30 H30C 0.9800 . ?
 C31 C32 1.549(4) . ?
 C31 C33 1.526(4) . ?
 C31 C34 1.551(5) . ?
 C32 H32A 0.9800 . ?
 C32 H32B 0.9800 . ?
 C32 H32C 0.9800 . ?
 C33 H33A 0.9800 . ?
 C33 H33B 0.9800 . ?
 C33 H33C 0.9800 . ?
 C34 H34A 0.9800 . ?
 C34 H34B 0.9800 . ?
 C34 H34C 0.9800 . ?
 K1 O1 2.856(2) . ?
 K1 O2 2.807(2) . ?
 K1 O3 2.786(2) . ?
 K1 O4 2.845(2) . ?
 K1 O5 2.873(2) . ?
 K1 O6 2.811(2) . ?
 K1 N1 3.039(3) . ?
 K1 N2 3.052(3) . ?
 O1 C36 1.422(4) . ?
 O1 C37 1.434(4) . ?
 O2 C38 1.422(4) . ?
 O2 C39 1.421(4) . ?
 O3 C42 1.426(4) . ?
 O3 C43 1.425(4) . ?
 O4 C44 1.423(4) . ?
 O4 C45 1.431(4) . ?
 O5 C48 1.432(4) . ?
 O5 C49 1.422(3) . ?
 O6 C50 1.416(4) . ?
 O6 C51 1.424(4) . ?
 N1 C35 1.472(4) . ?
 N1 C41 1.477(4) . ?
 N1 C47 1.471(4) . ?
 N2 C40 1.472(4) . ?
 N2 C46 1.469(4) . ?
 N2 C52 1.474(4) . ?
 C35 H35A 0.9900 . ?
 C35 H35B 0.9900 . ?
 C35 C36 1.510(4) . ?
 C36 H36A 0.9900 . ?
 C36 H36B 0.9900 . ?
 C37 H37A 0.9900 . ?
 C37 H37B 0.9900 . ?
 C37 C38 1.492(4) . ?
 C38 H38A 0.9900 . ?
 C38 H38B 0.9900 . ?
 C39 H39A 0.9900 . ?
 C39 H39B 0.9900 . ?
 C39 C40 1.498(5) . ?
 C40 H40A 0.9900 . ?
 C40 H40B 0.9900 . ?
 C41 H41A 0.9900 . ?
 C41 H41B 0.9900 . ?
 C41 C42 1.500(4) . ?
 C42 H42A 0.9900 . ?
 C42 H42B 0.9900 . ?
 C43 H43A 0.9900 . ?
 C43 H43B 0.9900 . ?
 C43 C44 1.492(5) . ?
 C44 H44A 0.9900 . ?
 C44 H44B 0.9900 . ?
 C45 H45A 0.9900 . ?
 C45 H45B 0.9900 . ?
 C45 C46 1.499(5) . ?
 C46 H46A 0.9900 . ?
 C46 H46B 0.9900 . ?
 C47 H47A 0.9900 . ?
 C47 H47B 0.9900 . ?
 C47 C48 1.501(4) . ?
 C48 H48A 0.9900 . ?
 C48 H48B 0.9900 . ?
 C49 H49A 0.9900 . ?
 C49 H49B 0.9900 . ?
 C49 C50 1.488(4) . ?
 C50 H50A 0.9900 . ?
 C50 H50B 0.9900 . ?
 C51 H51A 0.9900 . ?
 C51 H51B 0.9900 . ?
 C51 C52 1.508(4) . ?
 C52 H52A 0.9900 . ?
 C52 H52B 0.9900 . ?

loop_
  _geom_angle_atom_site_label_1
  _geom_angle_atom_site_label_2
  _geom_angle_atom_site_label_3
  _geom_angle
  _geom_angle_site_symmetry_1
  _geom_angle_site_symmetry_3
  _geom_angle_publ_flag
 C1 Co1 C20 127.49(10) . . ?
 C1 Co1 C21 160.30(11) . . ?
 C2 Co1 C1 35.76(10) . . ?
 C2 Co1 C3 37.57(10) . . ?
 C2 Co1 C4 61.71(11) . . ?
 C2 Co1 C5 59.38(11) . . ?
 C2 Co1 C20 117.15(11) . . ?
 C2 Co1 C21 132.53(10) . . ?
 C2 Co1 C22 163.98(10) . . ?
 C3 Co1 C1 61.31(9) . . ?
 C3 Co1 C4 37.52(10) . . ?
 C3 Co1 C5 60.83(10) . . ?
 C3 Co1 C20 132.56(10) . . ?
 C3 Co1 C21 120.76(10) . . ?
 C3 Co1 C22 131.71(10) . . ?
 C4 Co1 C1 60.73(10) . . ?
 C4 Co1 C5 36.32(9) . . ?
 C4 Co1 C20 166.16(9) . . ?
 C4 Co1 C21 134.46(10) . . ?
 C4 Co1 C22 118.18(11) . . ?
 C5 Co1 C1 35.13(10) . . ?
 C5 Co1 C20 156.79(9) . . ?
 C5 Co1 C21 164.57(10) . . ?
 C18 Co1 C1 125.59(10) . . ?
 C18 Co1 C2 158.01(10) . . ?
 C18 Co1 C3 160.67(11) . . ?
 C18 Co1 C4 126.14(11) . . ?
 C18 Co1 C5 112.97(11) . . ?
 C18 Co1 C19 37.18(10) . . ?
 C18 Co1 C20 60.68(11) . . ?
 C18 Co1 C21 59.91(10) . . ?
 C18 Co1 C22 36.60(9) . . ?
 C19 Co1 C1 112.57(10) . . ?
 C19 Co1 C2 127.27(11) . . ?
 C19 Co1 C3 161.98(11) . . ?
 C19 Co1 C4 157.19(10) . . ?
 C19 Co1 C5 125.23(10) . . ?
 C19 Co1 C20 35.55(9) . . ?
 C19 Co1 C21 58.72(9) . . ?
 C19 Co1 C22 59.81(11) . . ?
 C20 Co1 C21 34.79(9) . . ?
 C22 Co1 C1 160.02(10) . . ?
 C22 Co1 C5 131.29(11) . . ?
 C22 Co1 C20 58.62(10) . . ?
 C22 Co1 C21 34.68(10) . . ?
 C2 C1 Co1 68.16(16) . . ?
 C2 C1 C6 125.4(3) . . ?
 C5 C1 Co1 71.79(16) . . ?
 C5 C1 C2 106.8(2) . . ?
 C5 C1 C6 127.3(3) . . ?
 C6 C1 Co1 131.6(2) . . ?
 Co1 C2 H2 124.7 . . ?
 C1 C2 Co1 76.09(18) . . ?
 C1 C2 H2 124.7 . . ?
 C1 C2 C3 110.2(3) . . ?
 C3 C2 Co1 71.57(17) . . ?
 C3 C2 H2 124.7 . . ?
 C2 C3 Co1 70.87(17) . . ?
 C2 C3 C4 106.3(2) . . ?
 C2 C3 C10 119.1(3) . . ?
 C4 C3 Co1 73.10(17) . . ?
 C4 C3 C10 132.6(3) . . ?
 C10 C3 Co1 132.6(2) . . ?
 C3 C4 Co1 69.38(17) . . ?
 C3 C4 C14 133.0(2) . . ?
 C5 C4 Co1 72.83(17) . . ?
 C5 C4 C3 105.8(2) . . ?
 C5 C4 C14 120.9(3) . . ?
 C14 C4 Co1 126.9(2) . . ?
 Co1 C5 H5 124.6 . . ?
 C1 C5 Co1 73.08(17) . . ?
 C1 C5 C4 110.8(3) . . ?
 C1 C5 H5 124.6 . . ?
 C4 C5 Co1 70.85(17) . . ?
 C4 C5 H5 124.6 . . ?
 C1 C6 C9 110.5(2) . . ?
 C7 C6 C1 110.4(2) . . ?
 C7 C6 C9 107.6(3) . . ?
 C8 C6 C1 111.3(3) . . ?
 C8 C6 C7 109.2(3) . . ?
 C8 C6 C9 107.8(3) . . ?
 C6 C7 H7A 109.5 . . ?
 C6 C7 H7B 109.5 . . ?
 C6 C7 H7C 109.5 . . ?
 H7A C7 H7B 109.5 . . ?
 H7A C7 H7C 109.5 . . ?
 H7B C7 H7C 109.5 . . ?
 C6 C8 H8A 109.5 . . ?
 C6 C8 H8B 109.5 . . ?
 C6 C8 H8C 109.5 . . ?
 H8A C8 H8B 109.5 . . ?
 H8A C8 H8C 109.5 . . ?
 H8B C8 H8C 109.5 . . ?
 C6 C9 H9A 109.5 . . ?
 C6 C9 H9B 109.5 . . ?
 C6 C9 H9C 109.5 . . ?
 H9A C9 H9B 109.5 . . ?
 H9A C9 H9C 109.5 . . ?
 H9B C9 H9C 109.5 . . ?
 C11 C10 C3 110.1(2) . . ?
 C11 C10 C12 106.9(2) . . ?
 C12 C10 C3 115.7(3) . . ?
 C13 C10 C3 109.7(2) . . ?
 C13 C10 C11 106.7(3) . . ?
 C13 C10 C12 107.4(3) . . ?
 C10 C11 H11A 109.5 . . ?
 C10 C11 H11B 109.5 . . ?
 C10 C11 H11C 109.5 . . ?
 H11A C11 H11B 109.5 . . ?
 H11A C11 H11C 109.5 . . ?
 H11B C11 H11C 109.5 . . ?
 C10 C12 H12A 109.5 . . ?
 C10 C12 H12B 109.5 . . ?
 C10 C12 H12C 109.5 . . ?
 H12A C12 H12B 109.5 . . ?
 H12A C12 H12C 109.5 . . ?
 H12B C12 H12C 109.5 . . ?
 C10 C13 H13A 109.5 . . ?
 C10 C13 H13B 109.5 . . ?
 C10 C13 H13C 109.5 . . ?
 H13A C13 H13B 109.5 . . ?
 H13A C13 H13C 109.5 . . ?
 H13B C13 H13C 109.5 . . ?
 C4 C14 C15 113.5(3) . . ?
 C4 C14 C16 110.7(2) . . ?
 C4 C14 C17 112.8(3) . . ?
 C15 C14 C16 105.2(3) . . ?
 C17 C14 C15 109.2(2) . . ?
 C17 C14 C16 104.9(3) . . ?
 C14 C15 H15A 109.5 . . ?
 C14 C15 H15B 109.5 . . ?
 C14 C15 H15C 109.5 . . ?
 H15A C15 H15B 109.5 . . ?
 H15A C15 H15C 109.5 . . ?
 H15B C15 H15C 109.5 . . ?
 C14 C16 H16A 109.5 . . ?
 C14 C16 H16B 109.5 . . ?
 C14 C16 H16C 109.5 . . ?
 H16A C16 H16B 109.5 . . ?
 H16A C16 H16C 109.5 . . ?
 H16B C16 H16C 109.5 . . ?
 C14 C17 H17A 109.5 . . ?
 C14 C17 H17B 109.5 . . ?
 C14 C17 H17C 109.5 . . ?
 H17A C17 H17B 109.5 . . ?
 H17A C17 H17C 109.5 . . ?
 H17B C17 H17C 109.5 . . ?
 C19 C18 Co1 71.85(17) . . ?
 C19 C18 C22 105.4(2) . . ?
 C19 C18 C23 127.3(2) . . ?
 C22 C18 Co1 74.66(18) . . ?
 C22 C18 C23 125.7(3) . . ?
 C23 C18 Co1 129.5(2) . . ?
 Co1 C19 H19 124.2 . . ?
 C18 C19 Co1 70.97(17) . . ?
 C18 C19 H19 124.2 . . ?
 C18 C19 C20 111.0(2) . . ?
 C20 C19 Co1 79.33(18) . . ?
 C20 C19 H19 124.2 . . ?
 C19 C20 Co1 65.12(17) . . ?
 C19 C20 C21 105.9(3) . . ?
 C19 C20 C27 121.5(2) . . ?
 C21 C20 Co1 73.85(18) . . ?
 C21 C20 C27 132.5(2) . . ?
 C27 C20 Co1 127.6(2) . . ?
 C20 C21 Co1 71.36(16) . . ?
 C20 C21 C31 133.0(3) . . ?
 C22 C21 Co1 66.77(17) . . ?
 C22 C21 C20 106.8(2) . . ?
 C22 C21 C31 119.2(2) . . ?
 C31 C21 Co1 134.9(2) . . ?
 Co1 C22 H22 124.4 . . ?
 C18 C22 Co1 68.74(17) . . ?
 C18 C22 C21 110.8(3) . . ?
 C18 C22 H22 124.4 . . ?
 C21 C22 Co1 78.56(18) . . ?
 C21 C22 H22 124.4 . . ?
 C18 C23 C24 111.4(2) . . ?
 C18 C23 C25 111.0(2) . . ?
 C18 C23 C26 109.4(3) . . ?
 C25 C23 C24 108.7(3) . . ?
 C25 C23 C26 108.4(3) . . ?
 C26 C23 C24 107.9(2) . . ?
 C23 C24 H24A 109.5 . . ?
 C23 C24 H24B 109.5 . . ?
 C23 C24 H24C 109.5 . . ?
 H24A C24 H24B 109.5 . . ?
 H24A C24 H24C 109.5 . . ?
 H24B C24 H24C 109.5 . . ?
 C23 C25 H25A 109.5 . . ?
 C23 C25 H25B 109.5 . . ?
 C23 C25 H25C 109.5 . . ?
 H25A C25 H25B 109.5 . . ?
 H25A C25 H25C 109.5 . . ?
 H25B C25 H25C 109.5 . . ?
 C23 C26 H26A 109.5 . . ?
 C23 C26 H26B 109.5 . . ?
 C23 C26 H26C 109.5 . . ?
 H26A C26 H26B 109.5 . . ?
 H26A C26 H26C 109.5 . . ?
 H26B C26 H26C 109.5 . . ?
 C28 C27 C20 112.7(3) . . ?
 C28 C27 C29 106.5(2) . . ?
 C29 C27 C20 110.4(2) . . ?
 C30 C27 C20 113.7(2) . . ?
 C30 C27 C28 108.2(2) . . ?
 C30 C27 C29 104.8(2) . . ?
 C27 C28 H28A 109.5 . . ?
 C27 C28 H28B 109.5 . . ?
 C27 C28 H28C 109.5 . . ?
 H28A C28 H28B 109.5 . . ?
 H28A C28 H28C 109.5 . . ?
 H28B C28 H28C 109.5 . . ?
 C27 C29 H29A 109.5 . . ?
 C27 C29 H29B 109.5 . . ?
 C27 C29 H29C 109.5 . . ?
 H29A C29 H29B 109.5 . . ?
 H29A C29 H29C 109.5 . . ?
 H29B C29 H29C 109.5 . . ?
 C27 C30 H30A 109.5 . . ?
 C27 C30 H30B 109.5 . . ?
 C27 C30 H30C 109.5 . . ?
 H30A C30 H30B 109.5 . . ?
 H30A C30 H30C 109.5 . . ?
 H30B C30 H30C 109.5 . . ?
 C21 C31 C34 109.3(3) . . ?
 C32 C31 C21 110.3(3) . . ?
 C32 C31 C34 105.2(3) . . ?
 C33 C31 C21 115.3(2) . . ?
 C33 C31 C32 106.7(3) . . ?
 C33 C31 C34 109.6(3) . . ?
 C31 C32 H32A 109.5 . . ?
 C31 C32 H32B 109.5 . . ?
 C31 C32 H32C 109.5 . . ?
 H32A C32 H32B 109.5 . . ?
 H32A C32 H32C 109.5 . . ?
 H32B C32 H32C 109.5 . . ?
 C31 C33 H33A 109.5 . . ?
 C31 C33 H33B 109.5 . . ?
 C31 C33 H33C 109.5 . . ?
 H33A C33 H33B 109.5 . . ?
 H33A C33 H33C 109.5 . . ?
 H33B C33 H33C 109.5 . . ?
 C31 C34 H34A 109.5 . . ?
 C31 C34 H34B 109.5 . . ?
 C31 C34 H34C 109.5 . . ?
 H34A C34 H34B 109.5 . . ?
 H34A C34 H34C 109.5 . . ?
 H34B C34 H34C 109.5 . . ?
 O1 K1 O5 96.23(6) . . ?
 O1 K1 N1 60.39(7) . . ?
 O1 K1 N2 118.88(7) . . ?
 O2 K1 O1 60.69(6) . . ?
 O2 K1 O4 93.75(7) . . ?
 O2 K1 O5 130.47(6) . . ?
 O2 K1 O6 93.62(7) . . ?
 O2 K1 N1 120.94(7) . . ?
 O2 K1 N2 58.31(7) . . ?
 O3 K1 O1 94.28(7) . . ?
 O3 K1 O2 121.46(7) . . ?
 O3 K1 O4 59.46(7) . . ?
 O3 K1 O5 102.05(6) . . ?
 O3 K1 O6 140.10(7) . . ?
 O3 K1 N1 59.94(6) . . ?
 O3 K1 N2 120.02(7) . . ?
 O4 K1 O1 127.98(6) . . ?
 O4 K1 O5 130.73(7) . . ?
 O4 K1 N1 119.27(7) . . ?
 O4 K1 N2 60.76(7) . . ?
 O5 K1 N1 60.62(6) . . ?
 O5 K1 N2 120.05(7) . . ?
 O6 K1 O1 121.20(6) . . ?
 O6 K1 O4 103.56(7) . . ?
 O6 K1 O5 59.74(6) . . ?
 O6 K1 N1 120.03(7) . . ?
 O6 K1 N2 60.58(6) . . ?
 N1 K1 N2 179.18(8) . . ?
 C36 O1 K1 113.22(18) . . ?
 C36 O1 C37 110.9(2) . . ?
 C37 O1 K1 108.28(17) . . ?
 C38 O2 K1 115.58(18) . . ?
 C39 O2 K1 119.72(19) . . ?
 C39 O2 C38 113.1(2) . . ?
 C42 O3 K1 115.70(16) . . ?
 C43 O3 K1 119.37(18) . . ?
 C43 O3 C42 112.8(3) . . ?
 C44 O4 K1 111.01(19) . . ?
 C44 O4 C45 111.8(2) . . ?
 C45 O4 K1 115.71(18) . . ?
 C48 O5 K1 112.69(17) . . ?
 C49 O5 K1 111.81(18) . . ?
 C49 O5 C48 112.0(2) . . ?
 C50 O6 K1 116.47(18) . . ?
 C50 O6 C51 111.7(2) . . ?
 C51 O6 K1 113.66(16) . . ?
 C35 N1 K1 109.02(19) . . ?
 C35 N1 C41 109.5(2) . . ?
 C41 N1 K1 109.53(18) . . ?
 C47 N1 K1 108.01(19) . . ?
 C47 N1 C35 110.6(2) . . ?
 C47 N1 C41 110.1(3) . . ?
 C40 N2 K1 111.4(2) . . ?
 C40 N2 C52 108.8(3) . . ?
 C46 N2 K1 106.74(19) . . ?
 C46 N2 C40 111.2(3) . . ?
 C46 N2 C52 110.4(3) . . ?
 C52 N2 K1 108.28(18) . . ?
 N1 C35 H35A 108.9 . . ?
 N1 C35 H35B 108.9 . . ?
 N1 C35 C36 113.2(3) . . ?
 H35A C35 H35B 107.8 . . ?
 C36 C35 H35A 108.9 . . ?
 C36 C35 H35B 108.9 . . ?
 O1 C36 C35 108.8(3) . . ?
 O1 C36 H36A 109.9 . . ?
 O1 C36 H36B 109.9 . . ?
 C35 C36 H36A 109.9 . . ?
 C35 C36 H36B 109.9 . . ?
 H36A C36 H36B 108.3 . . ?
 O1 C37 H37A 110.0 . . ?
 O1 C37 H37B 110.0 . . ?
 O1 C37 C38 108.7(3) . . ?
 H37A C37 H37B 108.3 . . ?
 C38 C37 H37A 110.0 . . ?
 C38 C37 H37B 110.0 . . ?
 O2 C38 C37 107.9(3) . . ?
 O2 C38 H38A 110.1 . . ?
 O2 C38 H38B 110.1 . . ?
 C37 C38 H38A 110.1 . . ?
 C37 C38 H38B 110.1 . . ?
 H38A C38 H38B 108.4 . . ?
 O2 C39 H39A 110.1 . . ?
 O2 C39 H39B 110.1 . . ?
 O2 C39 C40 108.0(3) . . ?
 H39A C39 H39B 108.4 . . ?
 C40 C39 H39A 110.1 . . ?
 C40 C39 H39B 110.1 . . ?
 N2 C40 C39 112.4(3) . . ?
 N2 C40 H40A 109.1 . . ?
 N2 C40 H40B 109.1 . . ?
 C39 C40 H40A 109.1 . . ?
 C39 C40 H40B 109.1 . . ?
 H40A C40 H40B 107.9 . . ?
 N1 C41 H41A 108.7 . . ?
 N1 C41 H41B 108.7 . . ?
 N1 C41 C42 114.4(3) . . ?
 H41A C41 H41B 107.6 . . ?
 C42 C41 H41A 108.7 . . ?
 C42 C41 H41B 108.7 . . ?
 O3 C42 C41 108.1(3) . . ?
 O3 C42 H42A 110.1 . . ?
 O3 C42 H42B 110.1 . . ?
 C41 C42 H42A 110.1 . . ?
 C41 C42 H42B 110.1 . . ?
 H42A C42 H42B 108.4 . . ?
 O3 C43 H43A 110.0 . . ?
 O3 C43 H43B 110.0 . . ?
 O3 C43 C44 108.6(3) . . ?
 H43A C43 H43B 108.3 . . ?
 C44 C43 H43A 110.0 . . ?
 C44 C43 H43B 110.0 . . ?
 O4 C44 C43 109.2(3) . . ?
 O4 C44 H44A 109.8 . . ?
 O4 C44 H44B 109.8 . . ?
 C43 C44 H44A 109.8 . . ?
 C43 C44 H44B 109.8 . . ?
 H44A C44 H44B 108.3 . . ?
 O4 C45 H45A 109.8 . . ?
 O4 C45 H45B 109.8 . . ?
 O4 C45 C46 109.5(3) . . ?
 H45A C45 H45B 108.2 . . ?
 C46 C45 H45A 109.8 . . ?
 C46 C45 H45B 109.8 . . ?
 N2 C46 C45 113.4(3) . . ?
 N2 C46 H46A 108.9 . . ?
 N2 C46 H46B 108.9 . . ?
 C45 C46 H46A 108.9 . . ?
 C45 C46 H46B 108.9 . . ?
 H46A C46 H46B 107.7 . . ?
 N1 C47 H47A 109.0 . . ?
 N1 C47 H47B 109.0 . . ?
 N1 C47 C48 113.1(3) . . ?
 H47A C47 H47B 107.8 . . ?
 C48 C47 H47A 109.0 . . ?
 C48 C47 H47B 109.0 . . ?
 O5 C48 C47 108.4(2) . . ?
 O5 C48 H48A 110.0 . . ?
 O5 C48 H48B 110.0 . . ?
 C47 C48 H48A 110.0 . . ?
 C47 C48 H48B 110.0 . . ?
 H48A C48 H48B 108.4 . . ?
 O5 C49 H49A 109.9 . . ?
 O5 C49 H49B 109.9 . . ?
 O5 C49 C50 109.0(2) . . ?
 H49A C49 H49B 108.3 . . ?
 C50 C49 H49A 109.9 . . ?
 C50 C49 H49B 109.9 . . ?
 O6 C50 C49 109.2(3) . . ?
 O6 C50 H50A 109.8 . . ?
 O6 C50 H50B 109.8 . . ?
 C49 C50 H50A 109.8 . . ?
 C49 C50 H50B 109.8 . . ?
 H50A C50 H50B 108.3 . . ?
 O6 C51 H51A 110.0 . . ?
 O6 C51 H51B 110.0 . . ?
 O6 C51 C52 108.7(3) . . ?
 H51A C51 H51B 108.3 . . ?
 C52 C51 H51A 110.0 . . ?
 C52 C51 H51B 110.0 . . ?
 N2 C52 C51 113.8(3) . . ?
 N2 C52 H52A 108.8 . . ?
 N2 C52 H52B 108.8 . . ?
 C51 C52 H52A 108.8 . . ?
 C51 C52 H52B 108.8 . . ?
 H52A C52 H52B 107.7 . . ?

_shelx_res_file
;
TITL ldpm46_a.res in P2(1)/c
    ldpm46.res
    created by SHELXL-2018/3 at 11:19:16 on 18-Jun-2018
REM Old TITL ldpm46 in P2(1)/c
REM SHELXT solution in P2(1)/c
REM R1 0.154, Rweak 0.018, Alpha 0.065, Orientation as input
REM Formula found by SHELXT: C52 N2 O6 K Co
CELL 0.71073 16.4529 16.3213 20.0312 90 92.95 90
ZERR 4 0.0006 0.0007 0.0007 0 0.004 0
LATT 1
SYMM -X,0.5+Y,0.5-Z
SFAC C H Co K N O
UNIT 208 376 4 4 8 24
RIGU

L.S. 10
PLAN  20
TEMP -123.14(10)
BOND $H
list 4
fmap 2
acta
SHEL 100 0.83
REM <olex2.extras>
REM <HklSrc "%.\\ldpm46.hkl">
REM </olex2.extras>

WGHT    0.034100
FVAR       0.20719
CO1   3    0.248156    0.729261    0.341786    11.00000    0.01680    0.02727 =
         0.01773   -0.00321   -0.00226    0.00064
C1    1    0.341061    0.628150    0.377096    11.00000    0.01536    0.02399 =
         0.02556    0.00117   -0.00246    0.00042
C2    1    0.308081    0.613041    0.312159    11.00000    0.01799    0.02856 =
         0.01865    0.00226    0.00208    0.00145
AFIX  13
H2    2    0.340793    0.606504    0.271782    11.00000   -1.20000
AFIX   0
C3    1    0.221782    0.598727    0.313444    11.00000    0.01807    0.02180 =
         0.02027   -0.00121   -0.00448    0.00239
C4    1    0.200829    0.608253    0.382892    11.00000    0.01816    0.02720 =
         0.01937   -0.00232    0.00105    0.00150
C5    1    0.275898    0.626671    0.419652    11.00000    0.02008    0.03391 =
         0.01707   -0.00252   -0.00128    0.00266
AFIX  13
H5    2    0.281279    0.635438    0.469091    11.00000   -1.20000
AFIX   0
C6    1    0.431977    0.632370    0.397353    11.00000    0.01513    0.02719 =
         0.02811    0.00154   -0.00124    0.00192
C7    1    0.472745    0.700412    0.358939    11.00000    0.02313    0.04334 =
         0.03998   -0.00041   -0.00620   -0.00367
AFIX  33
H7A   2    0.463950    0.690823    0.310814    11.00000   -1.50000
H7B   2    0.449196    0.753378    0.370509    11.00000   -1.50000
H7C   2    0.531273    0.700734    0.370825    11.00000   -1.50000
AFIX   0
C8    1    0.445900    0.647677    0.472131    11.00000    0.02172    0.05438 =
         0.03089   -0.00243   -0.00978    0.00420
AFIX  33
H8A   2    0.419811    0.604109    0.497016    11.00000   -1.50000
H8B   2    0.504459    0.648060    0.483885    11.00000   -1.50000
H8C   2    0.422381    0.700704    0.483569    11.00000   -1.50000
AFIX   0
C9    1    0.474284    0.551122    0.380774    11.00000    0.02328    0.04332 =
         0.06119   -0.00698   -0.00768    0.00675
AFIX  33
H9A   2    0.466235    0.539809    0.332843    11.00000   -1.50000
H9B   2    0.532649    0.555438    0.392683    11.00000   -1.50000
H9C   2    0.450860    0.506475    0.406260    11.00000   -1.50000
AFIX   0
C10   1    0.176655    0.559315    0.251926    11.00000    0.01944    0.03108 =
         0.01901   -0.00154   -0.00361    0.00205
C11   1    0.218824    0.582667    0.187692    11.00000    0.03526    0.04367 =
         0.01808   -0.00137   -0.00328   -0.00193
AFIX  33
H11A  2    0.217460    0.642304    0.182052    11.00000   -1.50000
H11B  2    0.275488    0.563964    0.191046    11.00000   -1.50000
H11C  2    0.190344    0.556588    0.149122    11.00000   -1.50000
AFIX   0
C12   1    0.086003    0.582806    0.240708    11.00000    0.02407    0.04537 =
         0.03051   -0.00354   -0.01165    0.00056
AFIX  33
H12A  2    0.081078    0.642478    0.236860    11.00000   -1.50000
H12B  2    0.063680    0.557102    0.199520    11.00000   -1.50000
H12C  2    0.055757    0.563738    0.278629    11.00000   -1.50000
AFIX   0
C13   1    0.180995    0.465605    0.257597    11.00000    0.03241    0.03582 =
         0.01957   -0.00611   -0.00284    0.00047
AFIX  33
H13A  2    0.154738    0.447946    0.297992    11.00000   -1.50000
H13B  2    0.152936    0.440834    0.218248    11.00000   -1.50000
H13C  2    0.238080    0.448210    0.260173    11.00000   -1.50000
AFIX   0
C14   1    0.121762    0.595181    0.419063    11.00000    0.02146    0.03613 =
         0.02389   -0.00535    0.00213   -0.00180
C15   1    0.053176    0.654875    0.396372    11.00000    0.02037    0.05102 =
         0.03418   -0.00813    0.00337    0.00104
AFIX  33
H15A  2    0.004636    0.643433    0.421177    11.00000   -1.50000
H15B  2    0.071034    0.711322    0.405101    11.00000   -1.50000
H15C  2    0.040255    0.647817    0.348411    11.00000   -1.50000
AFIX   0
C16   1    0.136003    0.610134    0.494939    11.00000    0.02833    0.05083 =
         0.02689   -0.00583    0.00891   -0.00498
AFIX  33
H16A  2    0.084979    0.601522    0.517126    11.00000   -1.50000
H16B  2    0.177318    0.571858    0.513187    11.00000   -1.50000
H16C  2    0.154742    0.666507    0.502624    11.00000   -1.50000
AFIX   0
C17   1    0.089935    0.506724    0.413204    11.00000    0.02375    0.03877 =
         0.02888   -0.00382    0.00451   -0.00642
AFIX  33
H17A  2    0.039625    0.501750    0.437041    11.00000   -1.50000
H17B  2    0.078971    0.492992    0.365971    11.00000   -1.50000
H17C  2    0.130930    0.469072    0.432870    11.00000   -1.50000
AFIX   0
C18   1    0.236336    0.852079    0.387971    11.00000    0.01721    0.02704 =
         0.01498   -0.00203   -0.00354    0.00265
C19   1    0.302451    0.854602    0.345208    11.00000    0.01689    0.02541 =
         0.01854   -0.00099   -0.00303    0.00064
AFIX  13
H19   2    0.359965    0.866709    0.360648    11.00000   -1.20000
AFIX   0
C20   1    0.274337    0.850146    0.276531    11.00000    0.02101    0.02270 =
         0.01787   -0.00377   -0.00214    0.00403
C21   1    0.186213    0.842355    0.276753    11.00000    0.01836    0.03367 =
         0.01838   -0.00372   -0.00564    0.00500
C22   1    0.165648    0.842639    0.344869    11.00000    0.01554    0.03103 =
         0.01820   -0.00333   -0.00187    0.00167
AFIX  13
H22   2    0.108721    0.842142    0.360113    11.00000   -1.20000
AFIX   0
C23   1    0.237421    0.875907    0.461825    11.00000    0.01738    0.03229 =
         0.01850   -0.00334   -0.00221    0.00195
C24   1    0.299970    0.825424    0.503550    11.00000    0.03504    0.03865 =
         0.01517   -0.00072   -0.00815    0.00087
AFIX  33
H24A  2    0.299218    0.842067    0.550521    11.00000   -1.50000
H24B  2    0.286349    0.767117    0.499559    11.00000   -1.50000
H24C  2    0.354345    0.834802    0.487254    11.00000   -1.50000
AFIX   0
C25   1    0.153729    0.863616    0.490095    11.00000    0.02860    0.05516 =
         0.02011   -0.01185    0.00245   -0.00573
AFIX  33
H25A  2    0.156013    0.879278    0.537385    11.00000   -1.50000
H25B  2    0.113609    0.897795    0.465270    11.00000   -1.50000
H25C  2    0.137915    0.805897    0.485753    11.00000   -1.50000
AFIX   0
C26   1    0.260734    0.966289    0.469386    11.00000    0.04310    0.03377 =
         0.02443   -0.00475   -0.00325    0.00062
AFIX  33
H26A  2    0.261460    0.981672    0.516704    11.00000   -1.50000
H26B  2    0.314841    0.975017    0.452357    11.00000   -1.50000
H26C  2    0.220836    1.000078    0.443942    11.00000   -1.50000
AFIX   0
C27   1    0.333509    0.858612    0.219405    11.00000    0.02291    0.02565 =
         0.01957   -0.00084   -0.00022    0.00025
C28   1    0.345255    0.777667    0.181754    11.00000    0.03220    0.03305 =
         0.02277   -0.00137    0.00408   -0.00040
AFIX  33
H28A  2    0.361298    0.734477    0.213767    11.00000   -1.50000
H28B  2    0.294108    0.762354    0.157737    11.00000   -1.50000
H28C  2    0.387842    0.784606    0.149771    11.00000   -1.50000
AFIX   0
C29   1    0.418708    0.885083    0.247596    11.00000    0.02839    0.03313 =
         0.02471    0.00116    0.00240   -0.00403
AFIX  33
H29A  2    0.438850    0.845261    0.281124    11.00000   -1.50000
H29B  2    0.456206    0.887525    0.211188    11.00000   -1.50000
H29C  2    0.415087    0.939246    0.268349    11.00000   -1.50000
AFIX   0
C30   1    0.308446    0.924902    0.167927    11.00000    0.03549    0.04100 =
         0.02685    0.00789    0.00163    0.00206
AFIX  33
H30A  2    0.300640    0.977079    0.190946    11.00000   -1.50000
H30B  2    0.351222    0.931083    0.136017    11.00000   -1.50000
H30C  2    0.257488    0.908831    0.143982    11.00000   -1.50000
AFIX   0
C31   1    0.117424    0.849440    0.221235    11.00000    0.02568    0.03531 =
         0.02110   -0.00247   -0.01046    0.00465
C32   1    0.035112    0.822476    0.248388    11.00000    0.02012    0.05611 =
         0.02939   -0.00680   -0.01023    0.00123
AFIX  33
H32A  2    0.024816    0.853815    0.288820    11.00000   -1.50000
H32B  2   -0.008717    0.832647    0.214405    11.00000   -1.50000
H32C  2    0.037159    0.763906    0.259118    11.00000   -1.50000
AFIX   0
C33   1    0.129607    0.798521    0.158631    11.00000    0.03784    0.04485 =
         0.01749   -0.00463   -0.00882    0.00481
AFIX  33
H33A  2    0.181267    0.813688    0.139716    11.00000   -1.50000
H33B  2    0.130627    0.740220    0.170345    11.00000   -1.50000
H33C  2    0.084751    0.808961    0.125633    11.00000   -1.50000
AFIX   0
C34   1    0.105713    0.940767    0.201669    11.00000    0.02993    0.03932 =
         0.03901   -0.00153   -0.01412    0.00567
AFIX  33
H34A  2    0.097902    0.973343    0.241934    11.00000   -1.50000
H34B  2    0.154017    0.960368    0.179869    11.00000   -1.50000
H34C  2    0.057817    0.946305    0.170841    11.00000   -1.50000
AFIX   0

K1    4    0.712089    0.799444    0.538852    11.00000    0.02132    0.03096 =
         0.02155    0.00052   -0.00248    0.00061
O1    6    0.646013    0.663393    0.607509    11.00000    0.03218    0.03026 =
         0.02523    0.00474   -0.00068    0.00493
O2    6    0.740507    0.639995    0.493039    11.00000    0.04199    0.03047 =
         0.02479   -0.00233    0.00333   -0.00222
O3    6    0.795469    0.861745    0.652305    11.00000    0.02710    0.04642 =
         0.03065   -0.01080   -0.00323   -0.00050
O4    6    0.878153    0.846755    0.534602    11.00000    0.02066    0.06066 =
         0.03254   -0.01112   -0.00208    0.00132
O5    6    0.565990    0.896152    0.532965    11.00000    0.02210    0.03497 =
         0.02834    0.00049   -0.00513    0.00027
O6    6    0.643161    0.852448    0.414983    11.00000    0.03176    0.03750 =
         0.02403    0.00609   -0.00093    0.00455
N1    5    0.622858    0.828483    0.665818    11.00000    0.02766    0.03252 =
         0.02301   -0.00027    0.00126   -0.00269
N2    5    0.802380    0.767843    0.412044    11.00000    0.02510    0.03921 =
         0.02466   -0.00127   -0.00047    0.00111
C35   1    0.585946    0.750955    0.686536    11.00000    0.03499    0.04174 =
         0.03015   -0.00006    0.00821    0.00006
AFIX  23
H35A  2    0.533924    0.742746    0.660317    11.00000   -1.20000
H35B  2    0.573498    0.754931    0.734258    11.00000   -1.20000
AFIX   0
C36   1    0.639961    0.677471    0.677143    11.00000    0.03320    0.03342 =
         0.02462    0.00320    0.00550   -0.00296
AFIX  23
H36A  2    0.694683    0.687664    0.698398    11.00000   -1.20000
H36B  2    0.616604    0.628698    0.698434    11.00000   -1.20000
AFIX   0
C37   1    0.695342    0.592857    0.595939    11.00000    0.03247    0.02991 =
         0.02806    0.00498   -0.00235    0.00079
AFIX  23
H37A  2    0.673649    0.544652    0.619175    11.00000   -1.20000
H37B  2    0.751814    0.602643    0.613600    11.00000   -1.20000
AFIX   0
C38   1    0.694466    0.577138    0.522553    11.00000    0.03647    0.02802 =
         0.02993   -0.00124   -0.00023    0.00199
AFIX  23
H38A  2    0.718677    0.522895    0.513836    11.00000   -1.20000
H38B  2    0.637832    0.577540    0.503294    11.00000   -1.20000
AFIX   0
C39   1    0.752162    0.626375    0.424128    11.00000    0.04798    0.03049 =
         0.02574   -0.00510    0.00229    0.00629
AFIX  23
H39A  2    0.701786    0.639812    0.397195    11.00000   -1.20000
H39B  2    0.765652    0.568131    0.416450    11.00000   -1.20000
AFIX   0
C40   1    0.820539    0.680155    0.404126    11.00000    0.03961    0.04616 =
         0.03118   -0.00534    0.00454    0.01069
AFIX  23
H40A  2    0.870264    0.666348    0.431770    11.00000   -1.20000
H40B  2    0.831605    0.669169    0.356843    11.00000   -1.20000
AFIX   0
C41   1    0.680976    0.857716    0.719268    11.00000    0.04488    0.04156 =
         0.02324   -0.00148   -0.00098   -0.00276
AFIX  23
H41A  2    0.705265    0.809607    0.742858    11.00000   -1.20000
H41B  2    0.650692    0.889399    0.752034    11.00000   -1.20000
AFIX   0
C42   1    0.748335    0.910248    0.695173    11.00000    0.03808    0.04294 =
         0.02481   -0.00728   -0.00155   -0.00056
AFIX  23
H42A  2    0.725400    0.958209    0.670507    11.00000   -1.20000
H42B  2    0.782945    0.930318    0.733639    11.00000   -1.20000
AFIX   0
C43   1    0.876186    0.891980    0.647285    11.00000    0.02367    0.06842 =
         0.03534   -0.01152   -0.00924   -0.00209
AFIX  23
H43A  2    0.905667    0.890136    0.691607    11.00000   -1.20000
H43B  2    0.874612    0.949559    0.631728    11.00000   -1.20000
AFIX   0
C44   1    0.918758    0.839900    0.598815    11.00000    0.02359    0.06957 =
         0.04021   -0.01519   -0.01081    0.00175
AFIX  23
H44A  2    0.975999    0.857955    0.596587    11.00000   -1.20000
H44B  2    0.918673    0.782061    0.613699    11.00000   -1.20000
AFIX   0
C45   1    0.923077    0.808232    0.483930    11.00000    0.01948    0.08168 =
         0.04627   -0.02053    0.00598   -0.00274
AFIX  23
H45A  2    0.931076    0.749495    0.494714    11.00000   -1.20000
H45B  2    0.977293    0.834191    0.482039    11.00000   -1.20000
AFIX   0
C46   1    0.877365    0.816759    0.417600    11.00000    0.03307    0.06261 =
         0.03182   -0.00849    0.01362   -0.01025
AFIX  23
H46A  2    0.863339    0.875164    0.410252    11.00000   -1.20000
H46B  2    0.913263    0.799838    0.381896    11.00000   -1.20000
AFIX   0
C47   1    0.559705    0.890723    0.651325    11.00000    0.03356    0.03625 =
         0.03625   -0.00091    0.00924    0.00427
AFIX  23
H47A  2    0.585581    0.945471    0.650945    11.00000   -1.20000
H47B  2    0.520983    0.890298    0.687552    11.00000   -1.20000
AFIX   0
C48   1    0.513497    0.877150    0.585677    11.00000    0.02196    0.03764 =
         0.04125    0.00325    0.00331    0.00549
AFIX  23
H48A  2    0.495406    0.819401    0.582021    11.00000   -1.20000
H48B  2    0.464763    0.912789    0.582471    11.00000   -1.20000
AFIX   0
C49   1    0.524545    0.891893    0.468980    11.00000    0.02299    0.03986 =
         0.03564   -0.00198   -0.01263    0.00366
AFIX  23
H49A  2    0.477992    0.930400    0.466942    11.00000   -1.20000
H49B  2    0.503278    0.835813    0.460979    11.00000   -1.20000
AFIX   0
C50   1    0.582290    0.913634    0.416990    11.00000    0.03389    0.03466 =
         0.03019    0.00365   -0.01272    0.00721
AFIX  23
H50A  2    0.552685    0.917805    0.372827    11.00000   -1.20000
H50B  2    0.607709    0.967376    0.427574    11.00000   -1.20000
AFIX   0
C51   1    0.701751    0.871356    0.367406    11.00000    0.04450    0.04192 =
         0.01857    0.00939    0.00152    0.00012
AFIX  23
H51A  2    0.738440    0.915300    0.384924    11.00000   -1.20000
H51B  2    0.674022    0.890859    0.325335    11.00000   -1.20000
AFIX   0
C52   1    0.750201    0.795156    0.354267    11.00000    0.04124    0.03471 =
         0.02088   -0.00082   -0.00058   -0.00384
AFIX  23
H52A  2    0.712082    0.750392    0.341052    11.00000   -1.20000
H52B  2    0.784827    0.805654    0.316200    11.00000   -1.20000
AFIX   0
HKLF 4


REM  ldpm46_a.res in P2(1)/c
REM wR2 = 0.1274, GooF = S = 0.939, Restrained GooF = 0.908 for all data
REM R1 = 0.0546 for 6061 Fo > 4sig(Fo) and 0.1080 for all 9827 data
REM 559 parameters refined using 690 restraints

END

WGHT      0.0341      0.0000

REM Highest difference peak  0.425,  deepest hole -0.444,  1-sigma level  0.068
Q1    1   0.2795  0.7770  0.3745  11.00000  0.05    0.43
Q2    1   0.3191  0.7372  0.3417  11.00000  0.05    0.42
Q3    1   0.2185  0.6841  0.3172  11.00000  0.05    0.41
Q4    1   0.2826  0.6829  0.3752  11.00000  0.05    0.38
Q5    1   0.2186  0.7418  0.3950  11.00000  0.05    0.35
Q6    1   0.7771  0.7863  0.4801  11.00000  0.05    0.35
Q7    1   0.3169  0.7170  0.2833  11.00000  0.05    0.34
Q8    1   0.2013  0.7798  0.3019  11.00000  0.05    0.31
Q9    1   0.1813  0.6981  0.3871  11.00000  0.05    0.31
Q10   1   0.1777  0.7307  0.3404  11.00000  0.05    0.31
Q11   1   0.7507  0.8407  0.5627  11.00000  0.05    0.31
Q12   1   0.2445  0.6582  0.3470  11.00000  0.05    0.31
Q13   1   0.0869  0.6242  0.4144  11.00000  0.05    0.30
Q14   1   0.0582  0.7371  0.3545  11.00000  0.05    0.30
Q15   1   0.2610  0.6204  0.3120  11.00000  0.05    0.28
Q16   1   0.3656  0.7639  0.3623  11.00000  0.05    0.28
Q17   1   0.7498  0.7588  0.5625  11.00000  0.05    0.28
Q18   1   0.3772  0.6273  0.3777  11.00000  0.05    0.28
Q19   1   0.2629  0.8434  0.4758  11.00000  0.05    0.27
Q20   1   0.1168  0.7346  0.3776  11.00000  0.05    0.27
;
_shelx_res_checksum                69367
_shelx_hkl_file
;
   0   0  -2   10.46    3.22
   0   0   2    7.06    0.81
   0   0  -2    6.83    0.78
   0   0   2    6.91    3.00
   0   0  -3   -0.02    0.58
   0   0   3    1.05    5.37
   0   0  -3    3.13    5.18
   0   0  -4  372.13   32.85
   0   0  -4  314.47   31.32
   0   0   4  325.91   32.97
   0   0  -4  308.72   31.41
   0   0   5   -1.73   10.96
   0   0  -5   -3.08   10.24
   0   0  -5    0.92    2.13
   0   0  -5   -0.22    1.00
   0   0  -6  601.23   57.83
   0   0  -6  625.21   57.71
   0   0   6  534.44   57.69
   0   0   6  609.16   59.69
   0   0  -7   -0.17    1.15
   0   0  -7    2.53    2.64
   0   0  -8  250.55   24.84
   0   0  -8  243.54   25.09
   0   0  -9    0.15    1.48
   0   0  -9    3.12    3.49
   0   0 -10   23.59    4.42
   0   0 -10   25.38    3.10
   0   0 -11    2.44    3.62
   0   0 -11   -1.28    1.73
   0   0 -12  617.63   58.54
   0   0 -12  528.87   58.77
   0   0 -13    0.52    1.98
   0   0 -13   -0.60    4.31
   0   0 -14  119.06   12.01
   0   0 -14  107.88   12.89
   0   0 -15    3.22    2.48
   0   0 -15    7.42    5.62
   0   0 -16  566.39   64.74
   0   0 -16  687.14   64.41
   0   0 -17    1.02    2.99
   0   0 -17    0.27    6.59
   0   0 -18   36.67    5.02
   0   0 -19    0.38    3.26
   0   0 -20   26.82    4.56
   0   0 -21   -1.21    3.75
   0   0 -22    2.40    3.88
   0   0 -23   -5.46    4.09
   0   0 -24   44.22    6.73
   0   1  -1   -0.47    0.23
   0  -1  -1   10.69    0.79
   0   1   2 1116.49  110.09
   0   1   2 1199.70  110.44
   0   1  -2 1074.91  110.08
   0   1  -2 1287.44  110.44
   0   1  -3  188.24   18.89
   0  -1  -3  185.09   18.88
   0   1  -3  212.08   20.13
   0   1   3  196.28   20.19
   0   1   3  209.47   19.08
   0   1  -4  571.90   56.27
   0  -1  -4  546.20   56.26
   0   1  -4  627.75   57.39
   0   1   4  600.11   56.40
   0   1   4  562.05   57.44
   0   1   5  240.77   26.08
   0  -1  -5  241.81   23.67
   0   1   5  235.87   23.68
   0   1  -5  234.31   23.42
   0   1  -5  262.66   26.14
   0  -1  -5  231.68   23.41
   0  -1  -6 1304.95  129.65
   0   1   6 1389.95  129.65
   0  -1  -6 1295.25  129.51
   0   1   6 1306.72  130.77
   0  -1   6 1245.77  129.50
   0   1  -6 1340.87  129.52
   0   1  -7   27.71    3.13
   0  -1  -7   28.27    3.13
   0  -1  -7   30.42    4.14
   0   1   7   28.64    4.28
   0   1  -8   23.07    2.69
   0  -1  -8   22.05    4.01
   0  -1  -8   21.33    2.66
   0   1  -9  335.94   34.47
   0  -1  -9  332.47   34.58
   0   1  -9  354.69   34.27
   0  -1  -9  339.72   34.25
   0   1 -10   35.96    4.06
   0   1 -10   32.38    4.97
   0  -1 -10   32.75    5.46
   0  -1 -10   36.58    4.00
   0  -1 -11  383.35   38.11
   0   1 -11  343.23   38.32
   0   1 -11  410.32   38.13
   0  -1 -11  361.62   38.45
   0   1 -12   61.53    8.35
   0  -1 -12   64.71    8.74
   0   1 -12   82.26    7.69
   0  -1 -12   70.20    7.63
   0  -1 -13    2.42    2.05
   0   1 -13    0.64    1.99
   0   1 -13    7.15    4.31
   0  -1 -13    4.14    4.69
   0   1 -14  310.99   30.35
   0   1 -14  274.33   30.74
   0  -1 -14  306.66   30.35
   0  -1 -15   24.19    3.77
   0   1 -15   23.19    5.95
   0   1 -15   30.59    3.79
   0  -1 -16  175.82   17.83
   0   1 -16  161.36   18.62
   0   1 -16  177.72   17.81
   0  -1 -17  113.55   11.34
   0   1 -17   92.79   12.67
   0   1 -17  105.00   11.31
   0  -1 -18    2.36    2.87
   0   1 -18   -0.81    6.19
   0   1 -18    0.54    3.01
   0  -1 -19    1.40    3.10
   0   1 -19    0.44    6.87
   0   1 -19   -2.51    3.14
   0  -1 -20   67.91    8.15
   0   1 -20   74.27    8.27
   0  -1 -21    3.41    3.77
   0   1 -21    0.56    3.85
   0   1 -22    9.64    4.08
   0  -1 -22    6.38    4.79
   0   1 -23   -0.50    4.01
   0  -1 -23    5.86    4.46
   0   1 -24   21.04    4.90
   0  -1 -24   13.02    4.80
   0  -2   0 3287.53  311.80
   0   2   0 3151.19  311.79
   0   2   0 3018.43  311.85
   0  -2   0 3015.17  311.85
   0  -2   1  109.55   10.07
   0  -2  -1   87.69    9.97
   0   2   1   99.02   10.01
   0   2   2    5.05    4.11
   0  -2  -2    8.68    2.38
   0   2  -2    6.49    1.05
   0   2  -2    8.83    3.79
   0   2  -3 1165.42  100.41
   0   2  -3  985.59   99.82
   0   2   3 1025.87  100.46
   0   2  -4  665.29   61.73
   0   2  -4  606.88   60.59
   0   2   4  589.20   61.78
   0  -2   5   44.38    5.25
   0   2   5   58.53    6.28
   0   2   5   56.83   11.67
   0   2  -5   52.78    5.23
   0   2  -5   53.99   10.87
   0  -2  -5   52.59    5.22
   0  -2   6  989.35  101.68
   0   2  -6 1017.46  101.69
   0   2  -6 1164.37  102.96
   0  -2  -6 1041.27  101.69
   0   2   6 1057.66  101.88
   0  -2  -7  259.43   25.16
   0   2  -7  244.60   25.14
   0  -2  -8    3.78    1.38
   0   2  -8    1.92    1.44
   0   2  -9    2.85    1.62
   0  -2  -9    0.91    1.51
   0   2 -10  193.46   18.94
   0  -2 -10  183.47   18.92
   0  -2 -11    2.13    1.65
   0   2 -11    1.17    1.74
   0   2 -12   84.09   10.24
   0   2 -12   95.44    9.63
   0  -2 -12   93.86    9.61
   0   2 -13   16.81    4.42
   0  -2 -13   14.69    2.70
   0   2 -13   20.41    2.78
   0  -2 -14    0.25    2.22
   0   2 -14    6.12    4.51
   0   2 -14    4.32    2.26
   0  -2 -15   23.13    3.64
   0   2 -15   25.94    5.69
   0   2 -15   25.27    3.68
   0   2 -16  285.28   33.15
   0  -2 -16  334.39   32.71
   0   2 -16  335.23   32.70
   0   2 -17   -0.91    2.94
   0   2 -17    5.56    5.86
   0  -2 -17    2.23    2.98
   0   2 -18   82.55   11.69
   0  -2 -18  105.59   10.67
   0   2 -18   94.70   10.36
   0   2 -19   56.18    6.76
   0   2 -19   50.60    8.78
   0  -2 -19   59.22    6.95
   0  -2 -20   21.91    4.36
   0   2 -20   22.47    7.40
   0   2 -20   22.42    4.24
   0  -2 -21   -0.89    3.69
   0   2 -21    1.00    3.77
   0   2 -21   -6.52    7.53
   0  -2 -22   -0.59    3.89
   0   2 -22    1.21    3.98
   0   2 -23    4.33    4.21
   0  -2 -23    9.38    4.27
   0   2 -24    2.27    4.37
   0  -3   0    0.07    1.86
   0   3   0   -1.14    1.44
   0  -3   0   -0.43    3.30
   0   3   1  758.33   71.29
   0   3   1  678.77   71.15
   0  -3   1  732.93   71.29
   0  -3  -1  723.33   71.27
   0   3   2   74.84    8.32
   0   3  -2   81.81    8.68
   0  -3   2   70.72    8.61
   0  -3  -2   67.82    8.09
   0   3  -3  107.11   10.20
   0   3  -3   98.23   11.20
   0  -3  -3  102.29   10.83
   0   3  -3  129.82   12.10
   0   3  -4 1407.78  126.79
   0  -3  -4 1329.98  126.73
   0   3  -4 1243.85  126.06
   0   3  -5   59.26    5.87
   0   3  -5   68.53   10.35
   0  -3  -5   51.98   10.00
   0  -3   5   54.20    5.90
   0   3  -6   56.39   10.54
   0   3  -6   48.98    5.15
   0   3  -7    8.69    1.65
   0   3  -8  177.20   17.81
   0   3  -9   48.52    5.24
   0  -3 -10   31.07    3.75
   0   3 -10   34.40    3.78
   0   3 -11  208.78   20.87
   0  -3 -11  205.85   20.84
   0   3 -12  224.97   22.25
   0  -3 -12  217.08   22.22
   0  -3 -13    5.14    2.15
   0   3 -13    6.82    2.27
   0   3 -14  232.37   25.44
   0   3 -14  257.49   25.08
   0  -3 -14  248.43   25.05
   0  -3 -15   28.12    3.95
   0   3 -15   19.90    5.90
   0   3 -15   31.07    4.08
   0   3 -16   11.44    3.14
   0   3 -16    4.82    5.44
   0  -3 -16   10.35    2.98
   0  -3 -17   75.25    8.35
   0   3 -17   69.17    9.73
   0   3 -17   77.57    8.35
   0   3 -18  105.14   14.30
   0  -3 -18  124.12   13.30
   0   3 -18  139.24   13.36
   0   3 -19   11.63    6.36
   0   3 -19    5.76    3.35
   0   3 -20   63.73    7.34
   0   3 -20   50.92    9.36
   0   3 -21   13.58    7.24
   0   3 -21   11.03    3.93
   0   3 -22   52.52    6.76
   0   3 -22   43.48    9.39
   0   3 -23   21.61    4.81
   0   3 -24   17.57    5.05
   0  -4   0 9444.35  961.23
   0   4   0 9544.61  961.09
   0  -4   0 9999.00  961.12
   0   4   1  272.26   28.38
   0  -4  -1  271.56   28.74
   0   4   1  328.10   28.85
   0  -4   1  285.05   28.83
   0   4   2  299.20   30.05
   0   4  -2  327.30   29.99
   0  -4   2  317.25   30.31
   0  -4  -2  276.80   30.00
   0  -4  -2  289.53   29.90
   0   4  -2  277.35   30.03
   0   4  -3  598.61   53.60
   0  -4  -3  495.11   53.30
   0   4  -3  532.50   53.35
   0   4  -4  104.86   11.46
   0   4  -4   76.08   10.38
   0  -4  -4  111.34   11.18
   0   4  -4   89.70    9.21
   0   4  -5   88.73    9.12
   0   4  -5   97.47   12.06
   0  -4  -5   98.75   11.82
   0   4  -6  248.66   24.86
   0   4  -7  496.84   49.50
   0   4  -8  272.09   27.22
   0   4  -9  210.56   21.15
   0   4 -10  445.89   44.51
   0   4 -11    9.26    2.15
   0   4 -12   28.57    3.62
   0   4 -13   11.06    2.62
   0   4 -14   -0.69    2.36
   0   4 -15   11.37    2.93
   0   4 -16    4.15    5.42
   0   4 -16    3.72    2.90
   0   4 -17  155.99   15.16
   0   4 -17  124.96   15.87
   0   4 -18   11.77    3.31
   0   4 -18    5.47    5.87
   0   4 -19   20.37    4.03
   0   4 -19   18.28    6.65
   0   4 -20   13.07    6.91
   0   4 -20   19.34    4.13
   0   4 -21   -2.12    3.73
   0   4 -21   10.55    6.97
   0   4 -22   24.22    4.80
   0   4 -23   28.78    5.24
   0   4 -24    3.53    4.69
   0   5   0    0.77    2.00
   0  -5   0    1.08    4.44
   0  -5   1   82.37    9.59
   0  -5  -1   80.10    9.24
   0   5   1   77.24    8.30
   0  -5  -2   54.18    6.74
   0   5  -2   56.73    7.14
   0   5   2   47.01    5.67
   0  -5   2   61.37    7.71
   0  -5  -3 1259.90  124.69
   0  -5  -3 1233.08  124.70
   0   5  -3 1406.96  124.75
   0  -5   3 1182.79  124.89
   0   5  -3 1176.71  124.67
   0   5  -4   39.33    7.15
   0   5  -4   28.68    6.20
   0   5  -4   38.43    4.03
   0  -5  -4   27.41    5.60
   0  -5  -5    8.39    6.52
   0   5  -5   -1.96    7.27
   0   5  -5   -1.17    1.48
   0   5  -6   60.90   10.55
   0   5  -6   63.05    6.60
   0   5  -7  101.31   10.56
   0  -5  -7  115.02   11.83
   0   5  -8   98.26    9.91
   0  -5  -8   86.69   11.25
   0   5  -9  186.89   18.83
   0   5 -10   24.80    3.20
   0   5 -11   23.41    3.22
   0   5 -12  159.06   16.19
   0   5 -13   83.76    8.90
   0   5 -14   57.85    6.56
   0   5 -15   12.65    3.19
   0   5 -16   32.04    4.54
   0   5 -17   21.24    3.84
   0   5 -18  141.25   13.93
   0   5 -18  113.56   14.76
   0   5 -19    5.85    3.47
   0   5 -19    3.50    6.04
   0   5 -20   30.93    7.84
   0   5 -20   41.48    5.66
   0   5 -21   -0.75    7.07
   0   5 -21    1.63    3.88
   0   5 -22    6.50    4.10
   0   5 -23   45.57    6.46
   0  -5 -23   33.92   11.08
   0  -5 -24    9.22   10.49
   0   5 -24    5.35    4.80
   0   6   0   69.03    7.23
   0  -6   0   60.55    8.52
   0  -6  -1   30.28    6.13
   0   6   1   33.52    4.11
   0  -6   1   26.11    6.34
   0  -6   2  375.76   34.63
   0  -6  -2  335.52   34.25
   0   6   2  327.50   33.83
   0  -6   3   44.51    7.98
   0  -6  -3   34.39    6.27
   0  -6  -4   44.18    6.60
   0  -6  -4   37.62    6.54
   0   6  -5    0.52    1.87
   0   6  -5    3.57    6.89
   0   6  -6  296.59   29.73
   0   6  -6  298.59   31.09
   0   6  -7    0.45    1.81
   0   6  -8  181.26   17.95
   0  -6  -8  162.97   18.89
   0   6  -9  226.29   22.31
   0  -6  -9  203.69   23.15
   0   6 -10   41.67    4.66
   0  -6 -10   31.31    7.39
   0  -6 -11   28.67    6.61
   0   6 -11   25.84    3.49
   0   6 -12   42.93    4.90
   0  -6 -12   34.27    7.98
   0  -6 -13   20.51    7.33
   0   6 -13   24.44    3.60
   0   6 -14    5.42    2.79
   0   6 -15    4.98    2.95
   0   6 -16   37.46    5.03
   0   6 -17  205.98   21.06
   0  -6 -18   45.83   10.55
   0   6 -18   60.20    6.98
   0   6 -19    8.16    3.56
   0  -6 -19    4.00    8.87
   0   6 -19    2.26    6.42
   0   6 -20    9.00    3.94
   0   6 -20   -1.45    6.42
   0  -6 -20   -5.49    9.07
   0  -6 -21    6.18    9.71
   0   6 -21    0.12    3.86
   0  -6 -22   21.06   10.36
   0   6 -22   19.85    4.75
   0  -6 -23    9.22   10.64
   0   6 -23   10.59    4.65
   0   7   0    1.27    2.46
   0  -7   0   -1.13    5.88
   0  -7  -1   29.98    7.02
   0  -7   1   42.46    7.19
   0   7   1   32.70    4.29
   0  -7  -2  176.10   17.98
   0   7   2  177.01   17.43
   0  -7   2  179.56   18.41
   0   7   2  156.11   16.96
   0  -7   3  918.40   85.26
   0  -7  -3  893.09   84.86
   0   7   3  809.61   84.43
   0  -7  -4   -1.00    5.48
   0  -7  -5   59.28    8.57
   0   7  -5   60.33    6.53
   0   7  -6    5.29    2.16
   0   7  -7  392.16   39.22
   0  -7  -8   52.65    8.99
   0   7  -8   63.31    6.69
   0  -7  -9  234.43   25.92
   0   7  -9  251.63   24.97
   0  -7 -10   25.92    6.89
   0   7 -10   26.40    3.56
   0   7 -11    7.67    2.48
   0  -7 -11   17.29    6.75
   0   7 -12    1.48    2.42
   0  -7 -12   -5.68    7.42
   0  -7 -13  196.44   24.00
   0   7 -13  230.23   22.65
   0  -7 -14    4.04    8.39
   0   7 -14    3.57    2.90
   0  -7 -15   28.32    8.95
   0   7 -15   35.89    4.86
   0  -7 -16   32.85    9.19
   0   7 -16   42.34    5.32
   0  -7 -17    5.83    8.61
   0   7 -17   10.69    3.49
   0  -7 -18   -3.43    9.12
   0   7 -18   -2.97    3.53
   0   7 -19   81.08    8.99
   0  -7 -19   66.18   12.43
   0  -7 -20    1.83    9.61
   0   7 -20   10.93    6.87
   0   7 -20    9.90    3.93
   0   7 -21   27.34    5.14
   0  -7 -21   25.72   10.04
   0  -7 -22   10.96   10.30
   0   7 -22   10.78    4.44
   0  -7 -23    5.78   11.11
   0   7 -23   24.69    5.33
   0   8   0  328.39   31.84
   0  -8   0  282.44   32.60
   0  -8  -1  736.29   74.67
   0   8   1  754.69   74.16
   0  -8   1  722.16   74.71
   0   8   2   14.34    2.94
   0  -8   2    5.29    7.66
   0  -8  -2   13.33    6.70
   0   8   3   59.84    8.97
   0  -8  -3   97.81   10.12
   0   8   3   71.40    8.00
   0  -8   3   67.38    9.13
   0  -8   3  100.27   11.69
   0   8   4   82.44    9.67
   0  -8   4  117.23   13.29
   0  -8  -4  112.97   11.35
   0   8  -5    9.70    2.59
   0  -8  -5    7.75    6.00
   0   8  -6    3.18    2.30
   0   8  -7   53.86    6.04
   0   8  -8    1.14    2.16
   0   8  -9   58.38    6.45
   0  -8  -9   55.14    9.19
   0   8 -10   13.41    2.82
   0  -8 -10    4.42    7.22
   0   8 -11   41.64    5.01
   0  -8 -11   33.81    8.66
   0  -8 -12   44.12    9.04
   0   8 -12   44.46    5.36
   0  -8 -13   30.41    8.40
   0   8 -13   12.52    3.22
   0   8 -14   83.38    8.92
   0  -8 -14   70.77   11.97
   0   8 -15    2.10    3.15
   0  -8 -15    4.67    8.54
   0   8 -16   24.97    4.12
   0  -8 -16    8.21    8.63
   0   8 -17   39.05    5.24
   0  -8 -17   19.40    9.56
   0   8 -18    4.46    3.57
   0  -8 -18  -16.00    9.40
   0   8 -19    5.16    3.73
   0  -8 -19    7.00    9.72
   0   8 -20    7.47    3.86
   0  -8 -20    7.71   10.08
   0   8 -21    8.41    4.35
   0  -8 -21   -9.95   10.30
   0   8 -22    5.96    4.48
   0  -8 -22   -6.69   11.14
   0  -8 -23   13.02   11.54
   0  -9   0    2.67    7.06
   0   9   0    2.76    2.90
   0   9   1   37.76    4.71
   0  -9  -1   27.80    7.71
   0  -9   1   41.33    8.78
   0  -9   2  457.84   40.00
   0  -9  -2  381.08   39.48
   0   9   2  370.49   38.61
   0  -9   3  325.65   27.16
   0   9   3  246.10   27.43
   0  -9   3  287.37   29.53
   0  -9  -3  284.05   28.54
   0   9   3  266.17   27.15
   0   9   3  216.75   27.46
   0  -9   3  218.04   27.40
   0  -9  -4   52.85    8.58
   0  -9   4   67.20   11.30
   0   9   4   53.09    6.02
   0  -9   4   38.77    7.94
   0   9   4   41.46    7.61
   0   9   5    7.79    2.96
   0  -9  -5   13.95    6.80
   0  -9  -6   20.62    7.46
   0   9  -6   18.71    3.43
   0   9  -7   45.94    5.47
   0   9  -8  238.11   24.11
   0  -9  -9   45.28   10.35
   0   9  -9   71.48    7.52
   0   9 -10   10.75    3.10
   0  -9 -10    6.02    8.13
   0   9 -11   73.22    7.80
   0  -9 -11   50.26   11.00
   0   9 -12   47.35    5.76
   0  -9 -12   41.27   10.37
   0  -9 -13  175.96   23.60
   0   9 -13  224.62   21.92
   0  -9 -14   15.12    8.95
   0   9 -14   24.49    4.07
   0   9 -15    0.77    3.15
   0  -9 -15   -9.01    9.04
   0  -9 -16    5.68    9.40
   0   9 -16   24.94    4.19
   0  -9 -17   -1.17    9.58
   0   9 -17    6.20    3.70
   0   9 -18   15.16    4.06
   0  -9 -18   18.87   10.26
   0  -9 -19   32.44   11.09
   0   9 -19   39.90    5.83
   0  -9 -20   -4.88   10.85
   0   9 -20    4.19    3.92
   0  -9 -21    2.91   11.34
   0   9 -21    6.48    4.23
   0   9 -22    5.96    4.69
   0  -9 -22    6.27   11.74
   0  10   0   60.28    6.96
   0 -10   0   59.97   10.12
   0 -10  -1  125.33   15.83
   0 -10   1  145.97   16.34
   0  10   1  133.75   13.98
   0 -10  -2  205.72   20.83
   0  10   2  178.26   19.18
   0 -10   2  217.63   21.71
   0  10   3  127.95   13.50
   0 -10  -3  127.50   15.50
   0 -10   3  143.24   17.38
   0 -10  -4   -4.53    7.75
   0  10   4   -0.24    5.50
   0 -10   4    2.97   10.52
   0 -10   4   -0.75    5.41
   0  10   4    0.26    2.73
   0  10   4    1.85    1.86
   0 -10   4    0.64    1.98
   0 -10  -5  193.93   18.10
   0  10   5  151.67   16.03
   0 -10   5  160.54   17.61
   0  10   5  138.40   17.07
   0 -10  -6   11.70    7.92
   0  10   6    5.24    3.28
   0  10  -6    6.02    3.10
   0  10  -7   22.64    3.87
   0  10  -8   75.18    8.35
   0  10  -9    2.44    3.04
   0 -10  -9    7.23    8.30
   0 -10 -10    8.90    9.35
   0  10 -10   31.10    4.42
   0 -10 -11   42.92   10.56
   0  10 -11   52.85    6.36
   0 -10 -12   24.20    9.57
   0  10 -12   20.53    4.03
   0 -10 -13    9.89    8.76
   0  10 -13    4.92    3.28
   0  10 -14   37.47    5.17
   0 -10 -14   33.27   10.08
   0 -10 -15   92.12   15.05
   0  10 -15  113.60   11.82
   0 -10 -16   10.75   10.04
   0  10 -16   19.92    4.26
   0  10 -17   40.24    5.62
   0 -10 -17   22.88   11.13
   0  10 -18  122.21   12.78
   0 -10 -18   94.92   16.24
   0 -10 -19    6.92   11.07
   0  10 -19   18.96    4.65
   0 -10 -20   19.16   11.44
   0  10 -20   11.43    4.52
   0  10 -21   33.25    5.79
   0 -10 -21   26.20   12.55
   0 -11   0   -3.38    9.23
   0  11   0    2.65    3.15
   0  11   1   27.28    4.46
   0 -11   1   36.88   10.32
   0 -11  -1   30.72    9.31
   0  11   2    8.87    3.29
   0 -11   2   15.59   10.28
   0 -11  -2    6.52    8.17
   0  11   3   22.91    3.93
   0 -11   3   24.79   12.01
   0 -11  -3   24.42    9.30
   0 -11   4   44.91   12.89
   0 -11   4   17.51    3.74
   0 -11   4   29.37    2.94
   0  11   4   15.74    3.95
   0 -11  -4   25.65    9.36
   0  11   4   15.89    4.06
   0 -11   5  105.47    9.24
   0  11   5   72.55   11.31
   0 -11   5   74.48   11.24
   0  11   5   70.09    9.54
   0 -11  -5   74.17   12.96
   0 -11  -6   -1.69    8.72
   0  11   6   -1.68    7.43
   0  11  -6    4.76    3.42
   0  11   6    0.58    3.21
   0 -11   6   -7.28    9.32
   0  11   7   31.69    5.21
   0 -11   7   22.11   10.87
   0  11   7   32.82    9.54
   0  11  -7   46.80    5.42
   0  11  -8   19.05    4.05
   0  11  -9   47.76    6.16
   0 -11 -10    0.45    9.37
   0  11 -10    5.28    3.58
   0  11 -11    2.51    3.41
   0 -11 -11  -11.50    9.44
   0  11 -12   55.94    6.53
   0 -11 -12   25.16   10.67
   0 -11 -13   18.30   10.13
   0  11 -13   17.46    4.06
   0 -11 -14   22.85   10.52
   0  11 -14   23.32    4.39
   0  11 -15    5.51    3.69
   0 -11 -15    4.65   10.34
   0 -11 -16  -11.41   11.05
   0  11 -16   23.53    4.47
   0  11 -17    2.16    4.03
   0 -11 -17    7.89   10.77
   0 -11 -18   38.83   13.18
   0  11 -18   59.22    7.42
   0  11 -19   21.96    4.93
   0 -11 -19   13.47   12.04
   0  11 -20    1.38    4.53
   0 -11 -20   -9.99   12.38
   0  11 -21    0.72    4.66
   0 -11 -21    5.13   12.60
   0 -12   0   12.67   10.05
   0 -12  -1    2.52    9.89
   0 -12   1    4.47   11.37
   0  12   1    0.92    3.33
   0 -12   2   38.87   12.59
   0  12   2   43.93    5.73
   0 -12  -2   50.03   10.33
   0  12   3   10.11    3.52
   0 -12  -3   -3.84    9.62
   0 -12   3   16.42   12.63
   0  12   4   -0.86    3.31
   0 -12  -4    8.39    9.76
   0 -12   5   28.88    5.47
   0 -12   5   42.47    4.41
   0 -12  -5   46.81   10.81
   0  12   5   29.61    5.11
   0  12   6    3.98    3.26
   0 -12   6    6.26    2.93
   0 -12   6    0.63    7.22
   0 -12  -6    6.84    9.71
   0  12  -6    2.37    3.81
   0 -12   7   -3.95   11.35
   0 -12  -7   -9.92   10.17
   0  12   7    1.85    3.46
   0  12  -7    6.03    3.83
   0  12  -8   29.06    4.65
   0 -12   8   17.59   11.25
   0  12   8   16.96    4.45
   0  12  -9  105.93   10.87
   0 -12   9   44.74   15.79
   0 -12  10   53.29   16.72
   0 -12 -10   79.43   14.14
   0  12 -10  106.30   10.77
   0 -12 -11   84.92   15.92
   0  12 -11  128.90   12.98
   0 -12 -12   47.77   11.83
   0  12 -12   65.08    7.62
   0 -12 -13   32.52   11.44
   0  12 -13   44.36    5.98
   0  12 -14    0.35    3.90
   0 -12 -14   12.82   10.66
   0 -12 -15   -9.05   11.24
   0  12 -15    8.57    4.05
   0 -12 -16   18.31   11.19
   0  12 -16   -1.47    4.17
   0 -12 -17   -2.31   11.48
   0  12 -17   -2.69    4.12
   0 -12 -18    2.66   12.22
   0  12 -18   19.29    4.88
   0  12 -19    0.69    4.44
   0 -12 -19   -1.51   12.67
   0  12 -20   -4.17    4.92
   0 -12 -20   17.63   12.92
   0 -13   0   -3.62   11.12
   0 -13   1   73.96   14.39
   0 -13  -1   72.88   13.33
   0  13   1   68.59    8.13
   0  13   2   41.62    5.69
   0 -13   2   37.81   13.78
   0 -13  -2   35.48   11.38
   0  13   3    9.74    3.77
   0 -13   3   21.14   14.56
   0 -13  -3   14.71   10.32
   0 -13  -4   13.41   10.17
   0 -13   4   -7.27   14.45
   0  13   4    3.70    3.46
   0 -13  -5   32.33   11.48
   0  13   5   24.02    4.45
   0 -13  -6   50.57   12.23
   0  13  -6   80.40    7.32
   0 -13   6   46.21    7.05
   0  13   6   43.24    6.61
   0  13   7   75.21   11.24
   0 -13  -7  109.15   15.53
   0 -13   7   89.98   13.01
   0  13   8   -2.47    3.53
   0  13  -8    5.38    4.07
   0  13   9   85.86   12.57
   0 -13   9   83.77   17.50
   0 -13  10   18.93   12.65
   0  13 -10    2.55    4.11
   0  13 -11   27.01    5.25
   0 -13  11   15.27   13.64
   0 -13 -11   45.29   11.37
   0  13 -12    5.38    4.13
   0 -13  12    1.20   15.10
   0 -13 -12    3.05   10.81
   0 -13 -13    5.63   11.16
   0  13 -13    0.50    4.25
   0 -13  13   -1.35   16.25
   0 -13 -14    3.16   11.33
   0  13 -14    4.29    4.23
   0 -13  14    6.76   18.06
   0 -13  15   34.63   20.54
   0  13 -15   74.10    8.80
   0 -13 -15   73.10   14.49
   0 -13  16  -19.78   20.58
   0  13 -16   -0.92    4.36
   0 -13 -16    5.68   11.60
   0  13 -17   57.65    7.43
   0 -13 -17   36.34   13.55
   0 -13 -18   24.67   12.48
   0  13 -18   20.54    5.45
   0 -13 -19   20.41   13.06
   0  13 -19   25.44    5.73
   0 -14   0   50.59   14.05
   0 -14   1    5.56   13.10
   0 -14  -1   22.72   12.09
   0  14   2    1.78    3.82
   0 -14  -2    7.65   11.12
   0 -14   2   -7.12   13.91
   0 -14   3   65.62   16.23
   0 -14  -3   51.19   12.48
   0  14   3   58.02    7.21
   0 -14   4   -2.86   14.96
   0  14   4    3.12    3.46
   0 -14  -4   -0.80   10.63
   0  14   5   91.59   10.33
   0 -14  -5  115.90   14.97
   0  14   6   -1.88    3.45
   0 -14  -6    7.53   11.13
   0  14  -6    1.16    4.31
   0  14   7   53.41    8.41
   0 -14  -7   85.07   14.09
   0  14   8    0.31    3.48
   0  14  -8    2.89    4.32
   0 -14  -8   -0.58   11.49
   0  14   9   -1.11    3.56
   0  14  -9   10.03    4.50
   0  14 -10    5.21    4.43
   0  14 -11   61.89    7.65
   0 -14 -11   25.87   13.40
   0 -14 -12    7.55   11.93
   0  14 -12   -8.73    4.76
   0 -14 -13   -6.19   12.32
   0  14 -13   -0.40    4.43
   0  14 -14   48.65    6.85
   0 -14 -14   33.88   13.41
   0 -14 -15    8.58   12.64
   0  14 -15    7.92    4.56
   0 -14 -16   38.67   14.63
   0  14 -16   68.64    8.31
   0 -14 -17   21.31   13.02
   0  14 -17   -6.68    5.02
   0 -14 -18    2.67   14.11
   0  14 -18    7.64    4.95
   0 -15   0  -18.75   13.41
   0 -15   1   22.17   14.55
   0 -15  -1    5.80   12.66
   0  15   2    4.79    3.74
   0 -15   2   -4.07   14.64
   0 -15   3   38.14   16.79
   0 -15  -3   49.14   12.82
   0  15   3   38.43    5.78
   0 -15   4   -6.89   16.50
   0  15   4    8.03    3.95
   0 -15  -4    8.73   11.22
   0 -15  -5   -8.15   11.34
   0  15   5   -5.16    3.79
   0  15   6    9.79    3.92
   0  15  -6   24.24    5.10
   0 -15  -6   11.23   11.37
   0  15  -7   17.46    5.10
   0  15   7   10.60    3.83
   0 -15  -7   22.39   12.16
   0  15   8    2.74    3.63
   0  15  -8   16.83    5.02
   0 -15  -8   16.77   12.43
   0  15   9   26.02    5.39
   0  15  -9   63.32    6.60
   0  15 -10   19.09    5.21
   0  15  10    4.85    3.91
   0  15 -11    9.34    5.06
   0  15 -12   23.81    5.59
   0 -15 -12   20.01   13.21
   0  15 -13    3.06    5.00
   0 -15 -13   38.53   13.00
   0  15  14   16.77    5.10
   0 -15 -14    8.41   13.22
   0  15 -14   28.55    5.68
   0  15 -15   28.32    5.60
   0 -15 -15   34.86   13.80
   0  15  15   15.92    5.36
   0 -15 -16    7.66   13.45
   0  15 -16    3.04    5.01
   0 -16   0   21.11   14.67
   0 -16  -1   39.27   14.78
   0 -16   1   28.65   15.99
   0 -16  -2   27.03   13.29
   0 -16   2    2.38   16.03
   0 -16   3   -3.29   17.11
   0 -16  -3    5.77   12.80
   0  16   3    0.70    3.70
   0  16   4   -2.26    3.92
   0 -16  -4    4.77   12.62
   0  16   5  139.42   15.19
   0 -16  -5  176.94   20.03
   0  16   6    3.78    3.83
   0  16  -6    9.77    5.05
   0 -16  -7    7.05   12.59
   0  16  -7   -2.32    5.24
   0  16   7    9.29    3.79
   0  16  -8    0.46    5.12
   0  16   8   -3.04    3.75
   0  16  -9   -0.31    5.26
   0  16   9    2.99    3.70
   0  16  10    1.28    3.75
   0  16 -10    5.23    5.38
   0  16 -11   68.61    9.16
   0  16 -12    1.74    5.31
   0 -16 -12   18.17   13.78
   0  16 -13    1.26    5.14
   0 -16 -13    3.96   14.27
   0  16 -14    1.61    5.20
   0 -16 -14    4.38   14.37
   0 -16 -15   63.57   15.96
   0  16  15   33.94    7.29
   0  16 -15   63.17    7.80
   0 -17   0   17.29   16.40
   0 -17   1   84.66   19.71
   0 -17  -1   66.45   17.78
   0 -17   2  -20.59   18.37
   0 -17  -2   14.69   14.46
   0  17   3   42.40    6.09
   0 -17   3   43.10   18.98
   0 -17  -3   41.26   15.22
   0 -17  -4   54.60   14.28
   0  17   4   30.18    5.21
   0  17   5    6.34    4.07
   0 -17  -5   18.16   13.43
   0 -17  -6    9.90   13.47
   0  17   6    8.40    4.09
   0  17  -6   13.39    5.43
   0 -17  -7  -10.95   13.26
   0  17   7    2.53    3.73
   0  17  -7    0.66    5.56
   0  17   8   17.58    4.62
   0  17  -8   34.85    6.21
   0 -17  -8    9.68   14.06
   0  17   9   16.87    4.51
   0  17  -9   32.33    6.23
   0 -17  -9    9.50   13.59
   0  17 -10   -1.88    5.69
   0  17  10   -0.60    3.77
   0  17 -11    4.72    5.51
   0  17 -12   -3.23    5.81
   0 -17 -12    0.75   15.24
   0 -17 -13    9.94   15.19
   0  17 -13   -2.02    5.73
   0 -18   0    7.98   17.34
   0 -18   1   37.34   18.31
   0 -18  -1   -2.95   17.42
   0 -18   2   11.50   19.22
   0 -18  -2   16.21   16.30
   0 -18  -3   -9.45   15.19
   0 -18   3  -29.65   19.61
   0 -18  -4   39.01   15.35
   0  18   4   20.08    4.81
   0 -18  -5   36.28   15.27
   0  18   5   24.93    4.97
   0  18  -6   11.50    5.59
   0  18   6    2.26    4.19
   0 -18  -6   17.41   14.64
   0  18  -7   50.09    6.91
   0 -18  -7   46.42   14.99
   0  18   7   14.78    5.00
   0  18  -8    0.35    5.75
   0  18   8   -4.31    4.01
   0 -18  -9    7.06   14.60
   0  18  -9    8.93    6.02
   0  18   9    0.24    4.18
   0  18 -10    3.45    6.04
   0  18  10    0.12    4.17
   0  18 -11   61.43    7.74
   0  18  11   25.30    5.76
   0 -19   0    7.15   20.00
   0 -19  -1    2.80   18.74
   0 -19   1   17.80   19.82
   0 -19  -2   21.51   17.52
   0 -19   2   25.68   20.42
   0 -19  -3    1.69   17.15
   0 -19  -4   -4.50   16.67
   0 -19  -5   -5.95   15.91
   0  19   5    8.36    4.18
   0  19  -5    5.63    5.73
   0  19  -6   16.34    6.17
   0  19   6    5.72    4.33
   0 -19  -6   16.69   16.45
   0  19  -7   13.89    6.28
   0  19   7   11.49    4.63
   0 -19  -7   23.86   16.22
   0 -19  -8    5.99   16.12
   0  19  -8   20.91    6.52
   0  19   8    6.10    4.33
   0  19  -9   28.96    7.12
   0 -20   0   18.24   20.66
   0 -20   1   32.62   21.80
   0 -20  -1  -16.12   21.06
   0 -20  -2  -13.70   19.88
   0 -20   2   -0.52   22.08
   0 -20  -3   22.84   18.77
   0 -20  -4   17.46   18.85
   1   0 -25    5.80    4.84
   1   0 -24  228.11   23.72
   1   0 -23    1.12    4.07
   1   0 -22   -0.34    3.87
   1   0 -21    4.32    3.50
   1   0 -20    2.56    3.44
   1   0 -19    2.23    7.08
   1   0 -19   -2.65    3.10
   1   0 -18  268.26   25.44
   1   0 -18  207.33   26.23
   1   0 -17   -0.47    2.78
   1   0 -17    7.94    6.60
   1   0 -16  244.60   29.64
   1   0 -16  304.86   28.99
   1   0 -15   -1.29    2.40
   1   0 -15   -2.56    5.68
   1   0 -14   10.67    4.91
   1   0 -14    9.64    2.37
   1   0 -13    1.04    1.82
   1   0 -13   -1.92    4.67
   1   0 -12   39.64    6.49
   1   0 -12   48.07    5.11
   1   0 -11   -0.22    1.51
   1   0 -11    3.78    3.80
   1   0 -10  272.70   26.42
   1   0 -10  240.08   26.78
   1   0  -9   -0.03    1.36
   1   0  -9   -1.11    3.67
   1   0  -8  709.09   73.91
   1   0  -8  754.51   73.72
  -1   0   7    0.27    1.08
   1   0  -7    0.78    2.61
   1   0  -7   -0.05    1.00
   1   0  -6  779.46   75.33
   1   0  -6  776.85   75.16
  -1   0   6  730.16   75.15
  -1   0   5    0.05    0.99
   1   0  -5   -0.53    0.91
  -1   0   4  446.56   46.09
   1   0  -4  480.76   46.09
   1   0  -3    0.23    0.51
  -1   0   2 5196.94  516.30
   1   0  -1   -1.28    2.36
  -1   0   1   -2.58    1.40
   1   0   1   -0.09    0.29
  -1   0  -1    0.33    0.26
   1   0   1    0.02    0.78
  -1   0  -1   -0.40    0.66
   1   0   2 2464.89  247.56
  -1   0  -2 2523.75  247.56
  -1   0  -3   -0.96    0.72
   1   0   3   -0.01    0.77
   1   0   3    0.25    1.22
   1   0   4  113.65   11.05
  -1   0  -4  116.93   11.06
   1   0   4  118.99   13.16
   1   0   4  100.12   10.91
  -1   0  -4  111.62   10.92
  -1   0  -5    0.54    2.19
   1   0   5    1.83    8.48
  -1   0  -5    0.18    1.08
  -1   0  -6    7.21    1.34
   1   0   6    9.21    7.70
  -1   0  -6    7.63    2.43
   1   0   7   -1.15    9.53
  -1   0  -7    0.61    1.20
  -1   0  -7    2.19    2.47
  -1   0  -8 1957.34  191.14
   1   0   8 1772.79  192.41
  -1   0  -8 1897.89  191.22
  -1   0  -9   -3.03    3.45
  -1   0  -9    1.10    1.61
   1   0   9    9.97   13.46
  -1   0 -10  341.51   36.77
  -1   0 -10  380.65   36.55
   1   0  10  327.62   39.76
   1   0  11  -15.48   16.00
  -1   0 -11   -0.55    3.88
  -1   0 -11   -0.60    1.70
  -1   0 -12   81.24   10.78
   1   0  12   53.77   19.58
  -1   0 -12  103.97   10.06
  -1   0 -13   -1.78    2.05
  -1   0 -13   -0.67    4.54
  -1   0 -14  297.78   28.77
  -1   0 -14  259.19   29.25
  -1   0 -15   -2.21    2.50
  -1   0 -16  172.75   17.68
  -1   0 -17   -1.05    2.90
  -1   0 -18  207.01   21.17
  -1   0 -19   -1.21    3.35
  -1   0 -20   84.31    9.47
  -1   0 -21   -3.41    3.90
  -1   0 -22    4.85    3.99
  -1   0 -23    1.51    4.06
  -1   0 -24  178.35   18.82
   1   1 -24   -2.28    4.40
   1  -1 -24    7.43    4.46
   1  -1 -23    4.13    4.16
   1   1 -23   -1.43    4.15
   1  -1 -22  117.79   12.80
   1   1 -22  118.12   12.73
   1   1 -21   -1.91    3.54
   1  -1 -21    4.82    4.00
   1   1 -20    3.99    3.64
   1   1 -20   10.67    7.10
   1  -1 -20    6.17    3.72
   1  -1 -19   -1.95    3.32
   1   1 -19    4.07    6.79
   1   1 -19    1.04    3.27
   1  -1 -18  210.17   21.04
   1   1 -18  211.85   21.05
   1   1 -18  180.47   21.99
   1  -1 -17  264.86   25.66
   1   1 -17  261.22   25.67
   1   1 -17  205.91   26.39
   1  -1 -16    6.98    6.44
   1   1 -16    6.42    2.69
   1   1 -16    7.73    5.87
   1  -1 -16    8.31    2.73
   1   1 -15   53.46    5.92
   1  -1 -15   55.48    8.36
   1   1 -15   41.79    7.48
   1  -1 -15   52.99    5.96
   1  -1 -14   99.88   12.47
   1  -1 -14  106.63   11.35
   1   1 -14   95.67   12.22
   1   1 -14  121.34   11.39
   1  -1 -13    9.42    5.10
   1   1 -13    8.75    2.10
   1   1 -13    7.53    4.46
   1  -1 -13    8.04    2.09
   1   1 -12  278.56   30.86
   1   1 -12  313.22   30.50
   1  -1 -12  277.90   30.92
   1  -1 -12  317.50   30.51
   1  -1 -11   13.24    4.23
   1   1 -11    6.17    3.77
   1  -1 -11   10.42    1.97
   1   1 -11   10.47    1.96
   1  -1 -10  268.54   29.88
   1   1 -10  276.94   29.75
   1   1 -10  307.66   29.50
   1  -1 -10  299.66   29.49
   1  -1  -9   75.20    9.43
   1   1  -9   84.14    8.70
   1  -1  -9   88.28    8.71
   1  -1  -8   17.25    4.02
   1  -1  -8   15.91    2.08
   1   1  -8   14.97    2.10
   1   1  -7  150.39   14.67
   1  -1  -7  150.67   15.07
  -1  -1   7  140.17   14.65
   1  -1  -7  147.75   14.66
   1  -1  -6 1227.60  119.25
  -1  -1   6 1180.36  119.24
   1  -1  -6 1209.81  119.42
  -1   1   6 1134.29  119.24
   1   1  -6 1265.67  119.25
   1   1  -5    1.11    0.97
  -1   1   5    1.85    3.17
  -1   1   5   -0.02    1.01
  -1  -1   5    0.07    1.04
   1  -1  -5   -0.05    0.96
   1  -1  -4    3.51    0.92
   1   1  -4    2.31    0.82
  -1   1   4    4.27    2.91
  -1  -1   4    2.64    0.95
   1  -1  -3   34.94    3.85
   1   1  -3   31.59    3.27
  -1   1   3   30.78    3.91
  -1   1   2 1202.49  111.50
   1   1  -2 1098.94  111.40
   1  -1  -2 1140.55  111.50
  -1   1   2 1137.22  111.85
   1  -1  -1   55.81    5.76
   1   1  -1   50.68    6.35
  -1   1   1   60.09    5.79
  -1   1   1   53.01    6.07
   1   1   0  137.51   13.84
   1   1   1   50.83    5.11
   1   1   1   55.49    5.33
   1  -1   1   50.75    5.12
  -1   1  -1   50.78    5.12
  -1   1  -1   50.83    5.19
   1   1   1   50.20    5.22
   1   1   2 2223.50  216.26
  -1   1  -2 2241.64  216.21
   1   1   2 2111.67  216.20
   1  -1   2 2226.14  216.21
  -1  -1  -2 2126.76  216.20
   1   1   3  283.81   30.93
   1   1   3  288.41   30.27
  -1  -1  -3  312.44   30.28
  -1   1  -3  320.85   30.29
   1  -1   3  301.57   30.28
  -1   1  -4    9.53    1.46
   1   1   4    7.76    1.40
   1  -1   4    9.50    1.50
   1   1   4   14.98    6.93
  -1  -1  -4   10.79    1.35
   1   1   5    9.16    1.68
  -1   1  -5   12.70    1.61
   1   1   5   11.14    3.10
  -1  -1  -5   11.58    1.63
   1   1   5    4.97    8.73
   1   1   6  314.63   37.23
  -1  -1  -6  349.23   35.64
  -1   1  -6  363.86   35.65
   1   1   6  370.71   35.79
  -1   1  -7 1351.54  132.48
  -1   1  -7 1317.54  132.52
   1   1   7 1288.67  133.64
  -1  -1  -7 1325.42  132.47
   1   1   7 1343.27  132.57
   1   1   8   93.92   16.53
  -1  -1  -8  119.05   11.98
  -1   1  -8  117.44   12.21
   1   1   8  117.05   12.39
  -1   1  -8  119.86   11.99
  -1  -1  -9  447.36   44.19
   1   1   9  397.17   46.66
  -1   1  -9  408.30   44.32
  -1   1  -9  464.56   44.20
  -1  -1 -10    1.79    1.69
  -1   1 -10    0.83    3.26
  -1   1 -10   -1.66    1.64
   1   1  10   -4.90   14.09
  -1   1 -11   -1.80    3.42
   1   1  11   -4.20   16.06
  -1  -1 -11    0.97    1.73
  -1   1 -11   -0.32    1.65
  -1  -1 -12   41.08    4.54
  -1   1 -12   37.02    5.67
   1   1  12   37.88   17.27
  -1   1 -12   39.29    4.54
  -1   1 -13  176.87   19.82
  -1  -1 -13  190.33   19.40
  -1   1 -13  200.29   19.41
  -1   1 -14   18.79    3.24
  -1  -1 -14   25.75    3.39
  -1   1 -14   21.05    5.28
  -1   1 -15   34.68    6.61
  -1  -1 -15   40.77    4.89
  -1   1 -15   39.85    4.89
  -1   1 -16    4.69    2.81
  -1   1 -16    3.70    5.91
  -1  -1 -16    0.08    2.85
  -1   1 -17   47.84    5.75
  -1   1 -17   47.09    8.13
  -1  -1 -17   46.14    5.79
  -1  -1 -18  155.10   15.73
  -1   1 -18  148.05   15.70
  -1  -1 -19    7.06    3.46
  -1   1 -19    4.90    3.33
  -1  -1 -20    2.60    3.48
  -1   1 -20   -0.32    3.56
  -1  -1 -21    0.56    3.63
  -1   1 -21   -1.63    3.95
  -1   1 -22   91.49   10.72
  -1  -1 -22   99.07   10.73
  -1   1 -23   21.84    4.89
  -1  -1 -23   22.91    5.71
  -1  -1 -24    8.18    4.99
  -1   1 -24    6.70    4.68
   1   2 -24   49.93    7.10
   1   2 -23   20.08    8.96
   1   2 -23   21.17    4.82
   1   2 -22    5.02    7.73
   1   2 -22    3.70    3.83
   1  -2 -21    2.01    3.67
   1   2 -21    6.69    3.59
   1   2 -21   -6.08    7.55
   1   2 -20   42.71    9.18
   1  -2 -20   52.06    6.71
   1   2 -20   59.48    6.67
   1   2 -19   31.00    7.69
   1  -2 -19   30.51    4.78
   1   2 -19   34.92    4.71
   1  -2 -18  159.79   15.95
   1   2 -18  131.72   16.90
   1   2 -18  156.92   15.92
   1   2 -17   68.94    7.65
   1   2 -17   56.22    9.36
   1  -2 -17   72.08    7.78
   1   2 -16   32.02    7.11
   1   2 -16   41.09    4.99
   1  -2 -16   42.23    5.23
   1   2 -15   30.35    4.20
   1   2 -15   27.12    6.24
   1  -2 -15   33.66    4.43
   1  -2 -14   14.20    2.74
   1   2 -14   10.48    2.64
   1   2 -14   10.77    4.94
   1   2 -13    7.96    4.49
   1   2 -13    5.88    2.18
   1  -2 -13    7.97    2.33
   1   2 -12   62.06    6.66
   1  -2 -12   64.54    6.69
   1  -2 -12   55.51    8.02
   1  -2 -11  102.12   13.38
   1  -2 -11  124.36   12.61
   1   2 -11  128.84   12.58
   1  -2 -10    9.60    4.65
   1   2 -10   12.64    2.08
   1  -2 -10   14.39    2.32
   1  -2  -9  487.58   54.17
   1   2  -9  536.02   53.84
   1  -2  -9  566.50   53.86
   1  -2  -8  293.24   29.40
   1   2  -8  301.63   29.40
   1  -2  -8  275.15   29.78
   1   2  -7  199.47   18.92
   1  -2  -7  181.04   19.37
   1  -2  -7  181.40   18.91
   1   2  -6   74.67    7.28
  -1   2   6   68.00    7.27
  -1  -2   6   71.62    7.27
  -1  -2   5    0.74    1.10
  -1   2   5   -0.34    3.56
  -1   2   5    0.20    1.09
   1   2  -5    0.64    1.03
   1   2  -4  320.24   31.37
  -1   2   4  348.50   31.72
  -1  -2   4  303.42   31.37
   1   2  -3  931.99   88.48
  -1   2   3 1053.32   88.68
  -1  -2   3  818.76   88.47
  -1   2   2   17.04    5.83
   1  -2  -1  663.82   58.69
   1   2  -1  518.12   58.79
  -1   2   1  495.60   58.74
   1   2  -1  616.52   58.88
   1   2  -1  603.19   58.62
  -1  -2   0   19.26    3.15
   1  -2   0   16.23    2.11
   1   2   0   24.88    3.12
   1  -2   0   19.06    2.48
  -1  -2  -1  545.45   55.19
   1   2   1  571.80   55.19
   1   2   1  552.43   55.05
  -1   2  -1  558.27   55.05
   1  -2   1  541.76   55.11
   1   2   2  754.70   71.31
   1  -2   2  686.08   71.27
   1  -2   2  724.51   71.17
  -1   2  -2  707.78   71.17
   1   2   3 1840.49  168.37
   1   2   3 1616.11  168.73
   1  -2   3 1604.17  168.37
  -1   2  -3 1658.22  168.37
   1   2   4  616.08   63.41
  -1  -2  -4  619.44   62.73
  -1   2  -4  627.11   62.55
   1   2   4  626.72   62.54
  -1  -2  -4  637.90   62.54
  -1  -2  -5   21.49    2.50
  -1   2  -5   21.22    2.49
   1   2   5   18.75    7.99
   1   2   5   21.10    2.49
  -1   2  -6    3.75    1.34
   1   2   6   -1.76    8.20
  -1  -2  -6    4.31    1.17
   1   2   6    3.69    3.09
  -1  -2  -7   87.29    9.22
   1   2   7   67.53   13.33
   1   2   7   94.89    9.92
  -1   2  -7   94.96    9.25
  -1  -2  -8  982.19  100.03
  -1   2  -8 1036.24  100.05
   1   2   8  969.96  101.64
  -1  -2  -9   67.01    7.24
   1   2   9   60.11   14.60
  -1   2  -9   72.77    7.27
  -1   2 -10    1.79    3.10
  -1   2 -10    1.15    1.73
   1   2  10    5.64   13.82
  -1  -2 -10    1.15    1.63
  -1  -2 -11    9.22    2.11
  -1   2 -11    7.70    3.47
   1   2  11   18.88   15.04
  -1   2 -11   11.46    2.12
  -1   2 -12   35.46    4.05
  -1  -2 -12   33.45    4.06
  -1   2 -12   32.40    5.02
  -1   2 -13   22.70    4.77
  -1   2 -13   24.05    3.38
  -1  -2 -13   25.42    3.30
  -1  -2 -14   26.01    3.63
  -1   2 -14   29.39    3.71
  -1   2 -14   21.45    5.28
  -1   2 -15    4.88    5.09
  -1   2 -15   -0.93    2.60
  -1  -2 -15    1.37    2.44
  -1   2 -16  164.70   19.42
  -1  -2 -16  180.17   18.71
  -1   2 -16  195.31   18.76
  -1   2 -17  100.90   10.56
  -1  -2 -17  101.51   10.50
  -1   2 -17   84.31   11.66
  -1  -2 -18   69.81    8.29
  -1   2 -18   79.47    8.26
  -1   2 -18   68.93    9.81
  -1   2 -19   -4.02    6.54
  -1   2 -19    3.10    3.36
  -1  -2 -19   -4.93    3.53
  -1  -2 -20   56.05    7.16
  -1   2 -20   50.95    6.68
  -1  -2 -21   -3.05    4.09
  -1   2 -21   -0.46    3.82
  -1   2 -22   22.15    4.81
  -1  -2 -22   25.14    5.01
  -1   2 -23   13.08    4.44
  -1  -2 -23    7.64    4.36
  -1  -2 -24   47.04    7.11
  -1   2 -24   54.05    7.13
   1   3 -24    7.25    4.65
   1   3 -23   -3.35    4.09
   1   3 -23   -4.65    8.23
   1   3 -22   62.59    7.31
   1   3 -22   43.55    9.86
   1   3 -21    8.09    7.36
   1   3 -21    7.02    3.76
   1   3 -20    2.94    6.74
   1   3 -20   -0.30    3.30
   1   3 -19    3.27    3.35
   1   3 -19    4.06    6.42
   1   3 -18   58.39    6.63
   1   3 -18   47.28    8.59
   1   3 -17   77.62    8.38
   1   3 -17   70.22    9.83
   1   3 -16  113.87   14.72
   1   3 -16  140.00   13.79
   1   3 -15    4.21    5.18
   1   3 -15   13.07    2.81
   1   3 -14   92.83    9.75
   1   3 -13    0.77    2.11
   1   3 -12  306.44   30.69
   1   3 -11    0.87    1.64
   1   3 -10  116.06   11.80
   1   3  -9  221.43   22.19
   1   3  -8    1.93    1.36
   1   3  -7   20.72    2.49
   1   3  -6  515.52   51.05
  -1  -3   6  510.52   51.05
   1  -3  -5  410.50   41.80
   1   3  -5  426.70   41.77
   1   3  -5  414.29   40.28
  -1  -3   5  393.38   40.27
   1   3  -4  526.51   52.37
   1   3  -3  267.54   26.67
  -1   3   2   64.50    9.35
  -1  -3   2   74.15    9.65
   1   3  -1  112.40   11.13
  -1   3   1  110.59   11.20
   1   3  -1  105.53   11.83
   1  -3  -1  153.45   12.01
   1   3  -1  115.52   12.26
  -1  -3   1  112.18   12.21
   1  -3  -1  121.82   11.33
  -1   3   1   94.04   11.37
  -1  -3   1   99.58   11.36
   1  -3  -1   98.88   11.49
  -1   3   0  159.18   15.03
  -1  -3   0  162.97   15.54
   1  -3   0  140.96   15.05
   1   3   0  142.00   15.50
   1   3   0  148.68   15.06
   1  -3   0  143.19   15.26
  -1  -3  -1  950.24   92.68
  -1   3  -1  924.36   92.57
   1   3   1 1020.50   92.68
   1   3   1  946.74   92.44
   1  -3   1  867.32   92.43
   1  -3   1  993.55   92.61
  -1   3  -2  218.70   19.71
  -1   3  -2  183.54   19.33
   1   3   2  204.63   19.86
   1  -3   2  199.95   19.74
   1  -3   3  221.29   24.71
   1   3   3  234.29   24.93
   1  -3   3  232.70   23.98
   1   3   3  259.88   24.47
  -1   3  -3  247.67   23.99
  -1   3  -4  215.71   22.33
   1   3   4  209.40   23.68
   1  -3   4  201.06   23.36
   1   3   4  235.72   22.33
   1   3   5  622.90   64.58
   1  -3   5  547.62   64.37
  -1  -3  -5  605.68   63.83
  -1   3  -5  668.15   63.61
  -1  -3  -6  110.92   12.29
  -1   3  -6  117.85   11.70
   1  -3   6  106.49   14.35
   1   3   6  112.66   15.29
   1   3   7   51.30   12.09
   1  -3   7   56.76   11.58
  -1   3  -7   59.99    6.21
  -1   3  -8   61.84    6.42
  -1  -3  -8   60.13    6.38
   1   3   8   74.73   13.25
   1  -3   8   57.41   12.53
   1   3   9  488.77   58.84
  -1  -3  -9  564.28   56.42
  -1   3  -9  581.49   56.44
   1  -3   9  494.73   58.59
   1  -3  10  121.25   18.88
  -1   3 -10  131.95   13.58
   1   3  10  102.38   19.40
  -1  -3 -10  137.49   13.59
   1  -3  11  -11.64   12.64
   1   3  11    3.46   14.33
  -1   3 -11    6.87    2.06
  -1  -3 -11   10.43    2.08
  -1  -3 -12   90.52    9.41
  -1   3 -12   89.17    9.36
  -1  -3 -13   38.08    4.40
  -1   3 -13   28.40    5.23
  -1   3 -13   33.58    4.23
  -1   3 -14  208.45   20.64
  -1   3 -14  178.18   20.94
  -1  -3 -14  213.79   20.66
  -1  -3 -15    9.48    2.95
  -1   3 -15    5.59    4.85
  -1   3 -15   10.07    2.83
  -1   3 -16   89.27    9.28
  -1  -3 -16   83.53    9.30
  -1   3 -16   81.76   10.29
  -1  -3 -17   86.62    9.31
  -1   3 -17   71.77   10.39
  -1   3 -17   89.27    9.31
  -1   3 -18   10.28    6.01
  -1  -3 -18   12.44    3.47
  -1   3 -18   14.67    3.55
  -1   3 -19   11.95    6.36
  -1   3 -19    8.30    3.48
  -1  -3 -19    7.44    3.41
  -1  -3 -20   55.00    6.61
  -1   3 -20   49.97    6.44
  -1   3 -20   44.43    8.62
  -1   3 -21   20.64    7.53
  -1   3 -21    2.53    3.87
  -1   3 -22   65.56    8.09
  -1   3 -23    8.63    4.42
  -1   3 -24    1.40    4.64
   1   4 -24   17.81    4.90
   1   4 -23    2.98    4.29
   1   4 -22   -0.70    3.92
   1   4 -22   -4.58    7.65
   1   4 -21   -1.63    3.57
   1   4 -21   -3.72    7.26
   1   4 -20   10.86    3.63
   1   4 -20   14.86    7.01
   1   4 -19   -1.93    3.16
   1   4 -19    0.43    6.29
   1   4 -18    1.11    3.00
   1   4 -18   -1.67    5.74
   1   4 -17  207.69   20.07
   1   4 -17  169.79   20.82
   1   4 -16   21.77    3.78
   1   4 -15  316.03   31.78
   1   4 -14   67.37    7.35
   1   4 -13    6.63    2.23
   1   4 -12  203.15   20.50
   1   4 -11   25.40    3.20
   1   4 -10   81.07    8.39
   1   4  -9  819.73   81.56
   1   4  -8   83.30    8.57
   1   4  -7    1.22    1.38
   1   4  -6  159.84   16.04
   1   4  -5   57.94   10.64
   1   4  -5   66.33    6.82
   1  -4  -5   71.72   10.52
   1   4  -4   17.30    2.21
   1  -4  -3  138.00   14.27
   1   4  -3  131.63   14.82
  -1  -4   2  755.47   67.57
   1  -4  -2  634.93   67.15
  -1   4   2  647.35   67.03
  -1   4   2  770.39   67.64
  -1  -4   1   33.91    4.68
   1   4  -1   36.51    6.22
   1  -4  -1   35.00    5.53
   1   4  -1   43.97    4.35
   1  -4  -1   33.86    6.10
  -1   4   1   40.65    4.80
   1  -4  -1   37.20    5.01
  -1  -4   1   36.12    7.16
  -1   4   1   35.74    4.54
   1  -4   0  242.37   26.08
   1   4   0  282.82   26.46
  -1   4   0  260.67   25.83
   1  -4   0  260.36   25.85
  -1  -4   0  250.16   26.42
   1   4   0  255.52   25.84
   1   4   1  732.82   74.27
   1  -4   1  777.82   74.54
  -1   4  -1  778.59   74.56
   1   4   1  823.48   74.66
  -1  -4  -1  751.60   74.65
   1  -4   1  672.97   74.30
   1  -4   1  785.16   74.27
   1  -4   2  152.07   16.70
   1   4   2  145.55   16.82
   1  -4   2  189.22   16.30
  -1   4  -2  163.05   16.82
  -1  -4  -2  144.17   16.96
   1   4   2  152.83   16.27
   1   4   2  155.37   17.08
   1  -4   2  150.07   16.85
   1  -4   3   -1.99    4.68
   1   4   3   -3.15    4.44
  -1   4  -3    0.06    1.46
  -1   4  -3   -3.47    4.03
   1   4   3   -1.34    5.18
   1  -4   3   -0.09    5.05
   1   4   4   -2.30    6.43
  -1   4  -4   -2.04    1.37
   1  -4   4   -2.53    5.82
  -1   4  -4    7.47    3.79
   1  -4   5   88.28   13.07
  -1  -4  -5  105.52   11.61
  -1   4  -5  109.44   10.85
   1   4   5   99.28   13.48
  -1   4  -6   66.48    6.83
  -1  -4  -6   60.45    8.05
   1   4   6   67.86   11.69
   1  -4   6   70.47   10.61
  -1   4  -7   25.50    3.10
  -1  -4  -7   26.28    5.15
   1  -4   7   21.52   10.14
   1   4   7   20.62   10.91
   1   4   8   97.24   14.54
   1  -4   8   77.77   13.85
  -1  -4  -8   78.15    9.73
  -1   4  -8   80.02    8.31
  -1   4  -9   42.86    4.67
   1   4   9   25.04   12.99
   1  -4   9   31.95   12.49
  -1   4 -10   64.29    6.67
   1   4  10   33.89   14.84
   1  -4  10   36.53   14.26
  -1   4 -11  428.35   42.80
  -1   4 -12   79.73    8.41
  -1   4 -13    8.22    2.47
  -1   4 -14   14.76    3.03
  -1   4 -15   67.10    7.27
  -1   4 -15   59.13    8.25
  -1   4 -16   16.68    5.60
  -1   4 -16   21.98    3.72
  -1   4 -17   47.79    5.70
  -1   4 -17   38.76    7.23
  -1   4 -18   23.77    6.23
  -1   4 -18   26.04    4.33
  -1   4 -19    4.18    3.44
  -1   4 -19   -0.63    6.12
  -1   4 -20    3.21    3.76
  -1   4 -20   -0.67    6.24
  -1   4 -21   -4.02    3.82
  -1   4 -22   12.95    4.24
  -1  -4 -22   10.55    9.66
  -1  -4 -23    0.66    9.89
  -1   4 -23    5.54    4.47
  -1   4 -24    5.45    4.59
   1   5 -24    9.32    4.71
   1   5 -23   -2.63    4.18
   1   5 -22   19.98    8.62
   1   5 -22   44.64    5.86
   1   5 -21   68.50   10.18
   1   5 -21   65.10    7.98
   1   5 -20    2.68    3.63
   1   5 -20    7.67    6.65
   1   5 -19   -5.53    6.73
   1   5 -19    3.44    3.45
   1   5 -18    1.57    6.02
   1   5 -18    1.60    3.07
   1   5 -17   28.01    4.27
   1   5 -16   25.05    3.95
   1   5 -15  281.92   28.41
   1   5 -14    2.68    2.59
   1   5 -13    4.37    2.31
   1   5 -12  223.99   22.58
   1   5 -11  159.63   16.17
   1   5 -10  102.27   10.52
   1   5  -9   15.65    2.36
   1   5  -8   19.81    2.70
   1   5  -7    2.10    1.71
   1   5  -6  627.09   62.43
   1   5  -5  299.49   31.47
   1   5  -5  305.00   30.02
   1  -5  -5  294.46   30.51
   1  -5  -5  278.31   31.31
   1  -5  -4  165.07   17.86
   1   5  -4  173.00   18.72
   1   5  -4  173.10   17.25
  -1  -5   3   16.81    6.65
  -1   5   3   11.04    6.50
   1  -5  -3   14.73    4.16
  -1  -5   2   20.96    4.68
  -1  -5   2   27.83    6.50
  -1   5   2   21.01    3.21
   1  -5  -2   24.56    4.49
  -1  -5   2   20.29    2.97
  -1   5   2   22.43    4.79
   1  -5  -1  124.00   13.99
  -1   5   1  130.29   13.41
   1   5  -1  146.24   13.50
  -1   5   1  128.89   13.53
  -1  -5   1  127.77   13.59
  -1  -5   1  132.24   14.72
  -1   5   0  191.68   19.00
  -1  -5   0  176.94   19.77
   1  -5   0  173.67   19.39
  -1   5   0  198.77   19.58
   1   5   0  191.02   19.01
   1  -5   1  143.35   13.98
   1   5   1  144.90   13.97
  -1   5  -1  156.49   14.82
   1  -5   1  134.84   14.74
  -1  -5  -1  132.38   14.97
   1   5   1  115.95   14.15
   1  -5   2    6.31    1.83
   1   5   2    2.40    3.85
  -1  -5  -2    8.77    4.95
   1  -5   2    5.51    3.56
   1   5   2    3.50    1.65
  -1   5  -2    0.54    4.65
   1  -5   2    2.46    4.31
   1  -5   3  160.79   18.34
   1  -5   3  178.06   18.54
  -1   5  -3  199.88   18.37
   1   5   3  165.12   18.56
   1   5   4  488.65   49.76
  -1   5  -4  468.67   49.29
  -1   5  -4  510.92   49.01
   1  -5   4  457.44   49.55
  -1   5  -5  273.38   26.61
   1  -5   5  238.43   27.77
  -1   5  -5  257.36   27.05
   1   5   5  263.22   28.20
   1   5   6  203.36   23.24
  -1   5  -6  222.57   20.87
   1  -5   6  185.15   22.45
  -1  -5  -6  191.21   21.60
  -1   5  -6  182.08   21.47
   1   5   7    6.45   10.78
  -1   5  -7   11.90    5.31
   1  -5   7    9.03    9.72
  -1  -5  -7    6.79    4.97
  -1   5  -7    4.39    1.88
  -1   5  -8  193.97   18.87
   1   5   8  166.17   22.58
   1  -5   8  167.85   22.16
  -1  -5  -8  171.69   19.67
   1   5   9   17.31   12.53
   1  -5   9   20.20   11.17
  -1  -5  -9   17.29    5.92
  -1   5  -9   18.71    2.72
  -1  -5 -10   97.97   12.23
  -1   5 -10  104.55   10.66
  -1   5 -11  310.30   30.50
  -1  -5 -11  282.63   31.27
  -1   5 -12  115.46   11.80
  -1  -5 -12  108.56   13.28
  -1  -5 -13   -1.20    6.49
  -1   5 -13    4.16    2.37
  -1  -5 -14    4.70    7.39
  -1   5 -14    9.98    2.94
  -1   5 -15  121.01   12.59
  -1  -5 -15  117.70   14.51
  -1   5 -16   47.73    5.81
  -1  -5 -16   44.97    9.38
  -1  -5 -17    0.18    7.98
  -1   5 -17    3.16    5.21
  -1   5 -17    3.41    3.15
  -1   5 -18    5.96    5.38
  -1   5 -18   -3.54    3.32
  -1  -5 -18    6.06    8.19
  -1   5 -19   27.18    4.49
  -1  -5 -19   16.25    8.82
  -1   5 -19   28.32    6.48
  -1  -5 -20   39.61   10.91
  -1   5 -20   58.48    6.82
  -1   5 -20   44.07    8.61
  -1   5 -21  115.23   12.33
  -1  -5 -21  100.82   15.17
  -1  -5 -22   16.33    9.90
  -1   5 -22   19.25    4.67
  -1   5 -23    4.09    4.29
  -1  -5 -23    5.74   10.22
  -1   5 -24    4.08    4.69
   1   6 -23    3.65    4.14
   1  -6 -23    5.39   10.37
   1   6 -22   10.25    4.19
   1   6 -21    2.48    3.91
   1   6 -21   11.96    7.02
   1   6 -20    8.98    7.01
   1   6 -20   11.70    3.97
   1   6 -19  149.39   15.63
   1   6 -18   11.97    3.57
   1   6 -17   22.34    3.81
   1   6 -16   15.41    3.41
   1   6 -15   99.36   10.57
   1   6 -14   -1.02    2.68
   1   6 -13   40.26    4.90
   1   6 -12    4.87    2.27
   1   6 -11    1.63    1.95
   1   6 -10   46.94    5.23
   1   6  -9  536.47   53.50
   1   6  -8   24.54    3.13
   1   6  -7  157.23   15.91
   1   6  -6   42.00    4.71
   1   6  -5   45.40    4.98
   1  -6  -5   41.64    6.75
   1   6  -5   44.27    8.70
   1   6  -4   -0.94    6.12
  -1  -6   4   16.18    7.89
  -1   6   4    1.63    7.50
   1  -6  -4    8.61    4.92
  -1  -6   3   14.41    7.48
  -1   6   3   19.33    7.28
   1  -6  -3   18.41    4.89
   1   6  -3    8.91    5.41
  -1   6   3    8.46    2.80
   1  -6  -3    6.18    5.37
   1  -6  -2    0.19    3.94
   1   6  -2    1.27    3.83
   1  -6  -2    3.05    4.45
  -1   6   2   -0.19    3.26
  -1  -6   2    1.76    3.12
  -1  -6   2    0.59    6.79
  -1   6   2    2.97    2.34
   1  -6  -1   -0.78    4.60
   1   6  -1    2.45    2.16
  -1  -6   1    6.02    6.08
  -1   6   1    1.49    2.34
  -1   6   0  248.87   23.76
   1  -6   0  217.26   24.28
   1   6   0  237.05   23.74
  -1  -6   0  214.40   24.45
   1   6   1  466.30   47.85
   1  -6   1  498.69   48.24
  -1  -6  -1  493.06   48.34
   1  -6   2   53.93    7.74
   1   6   2   56.18    6.88
   1  -6   2   62.94    5.88
   1   6   2   47.16    6.05
  -1  -6  -2   56.93    7.93
   1  -6   2   53.14    6.70
   1   6   2   53.74    5.80
   1  -6   3   -1.21    6.06
   1   6   3   -4.44    5.19
   1  -6   3   -3.21    4.88
   1  -6   3   -1.27    2.11
  -1  -6  -3    1.28    5.38
   1   6   4   -0.40    6.47
  -1   6  -4    2.43    1.86
   1  -6   4   -0.36    5.85
   1  -6   4    4.82    6.52
  -1   6  -5   37.10    4.14
   1  -6   5   27.07    8.26
   1   6   5   24.25    8.43
  -1   6  -6   -0.10    1.85
  -1  -6  -6   -3.53    5.65
   1   6   6    3.32    8.81
   1  -6   6   -2.85    8.64
   1   6   7   76.70   13.64
  -1  -6  -7   80.46   10.18
  -1   6  -7   83.20    8.57
   1  -6   7   76.23   12.63
   1   6   8   11.11   10.22
  -1  -6  -8   11.26    5.64
  -1   6  -8    6.97    2.03
   1  -6   8    6.57    9.68
  -1  -6  -9  119.38   14.56
  -1   6  -9  132.80   13.31
  -1   6 -10   18.96    2.85
  -1  -6 -10   15.98    6.48
  -1  -6 -11   23.59    7.34
  -1   6 -11   34.93    4.14
  -1  -6 -12   -3.53    7.04
  -1   6 -12    1.59    2.29
  -1   6 -13   17.74    3.18
  -1  -6 -13   15.59    7.66
  -1  -6 -14   32.64    9.01
  -1   6 -14   42.08    5.13
  -1   6 -15   76.15    8.13
  -1  -6 -15   56.59   10.85
  -1  -6 -16   74.25   13.09
  -1   6 -16  105.96   10.73
  -1  -6 -17    9.10    7.99
  -1   6 -17    6.80    3.32
  -1   6 -18    4.61    3.45
  -1   6 -18    5.61    5.70
  -1  -6 -18    3.60    8.55
  -1   6 -19   36.19    7.24
  -1   6 -19   37.42    5.45
  -1  -6 -19   40.03    9.52
  -1  -6 -20    3.45    9.00
  -1   6 -20    7.90    4.05
  -1   6 -21    6.51    4.07
  -1  -6 -21    2.23    9.27
  -1   6 -22    8.01    4.27
  -1  -6 -22    3.47   10.14
  -1  -6 -23    1.68   10.64
  -1   6 -23   10.92    4.70
   1  -7 -23    2.57   10.63
   1   7 -23    4.79    4.42
   1  -7 -22    8.49   10.66
   1   7 -22    5.64    4.36
   1  -7 -21   70.99   12.97
   1   7 -21   70.80   11.28
   1   7 -21   87.23    9.38
   1   7 -20    2.27    3.77
   1  -7 -20   11.68    9.35
   1   7 -19    6.03    3.71
   1  -7 -19   17.96    9.07
   1   7 -18    6.69    3.42
   1  -7 -18   14.69    9.02
   1   7 -17   18.09    3.87
   1   7 -16    2.82    2.94
   1   7 -15  345.79   34.78
   1   7 -14  103.43   10.94
   1  -7 -13   58.85    9.97
   1   7 -13   63.91    7.08
   1  -7 -12    5.45    7.10
   1   7 -12   12.82    2.82
   1   7 -11   86.56    8.95
   1  -7 -11   74.66   11.12
   1   7 -10   18.59    2.94
   1  -7 -10   14.31    6.44
   1  -7  -9   92.70   12.91
   1   7  -9  112.59   11.28
   1   7  -8   37.91    4.46
   1   7  -7    4.43    2.06
   1   7  -6  116.81   11.61
   1   7  -6   90.39   13.51
   1  -7  -6  111.27   12.86
   1  -7  -5  164.37   16.23
   1   7  -5  156.29   14.97
  -1   7   5  127.32   17.27
  -1  -7   5  124.06   17.62
   1  -7  -5  126.47   15.91
   1   7  -5  137.57   16.19
   1  -7  -4   68.43    8.91
   1   7  -4   74.72    8.88
   1  -7  -4   76.74    8.98
  -1   7   4   60.21   10.45
  -1  -7   4   57.68   10.75
  -1   7   3  217.66   24.23
  -1  -7   3  211.83   24.16
  -1   7   3  229.42   23.75
   1  -7  -3  261.64   24.47
   1  -7  -3  243.73   24.06
   1   7  -3  248.53   24.04
  -1  -7   3  254.70   25.55
  -1   7   2    1.02    2.80
   1  -7  -2    1.62    5.40
  -1   7   2    0.34    2.60
  -1  -7   2    4.64    2.65
   1   7  -2    1.49    3.17
  -1  -7   2    4.33    7.81
   1  -7  -2   -0.15    3.33
  -1  -7   1  567.70   56.60
   1   7  -1  573.48   55.87
  -1   7   1  563.89   55.88
   1  -7  -1  513.72   56.26
  -1   7   0  525.87   49.99
   1  -7   0  480.79   50.45
  -1  -7   0  463.86   50.57
   1   7   0  496.35   49.97
   1  -7   1  772.84   75.27
   1   7   1  735.00   74.84
  -1  -7  -1  769.62   75.35
   1   7   2   20.30    2.68
   1   7   2   17.10    3.37
   1  -7   2   23.08    2.77
   1  -7   2   16.68    4.19
   1   7   2   16.78    4.29
   1  -7   2   15.16    6.56
  -1  -7  -2   15.65    6.50
   1  -7   3   11.43    2.40
  -1  -7  -3   15.61    6.19
   1   7   3    3.80    4.89
   1  -7   3   13.75    7.11
   1  -7   3    5.65    4.89
   1   7   3    7.70    2.18
   1  -7   4   40.87    7.20
   1  -7   4   50.14    9.02
   1   7   4   33.18    7.47
   1  -7   5   17.59    7.14
  -1   7  -5   19.34    2.95
   1   7   5    7.60    7.16
  -1   7  -6    2.05    2.10
  -1  -7  -7    3.59    5.94
  -1   7  -7    4.51    2.14
  -1   7  -8   25.05    3.45
  -1  -7  -8   23.65    6.94
  -1   7  -9   75.59    7.96
  -1  -7  -9   68.84   10.19
  -1  -7 -10   48.88    9.09
  -1   7 -10   57.13    6.23
  -1  -7 -11  163.14   20.81
  -1   7 -11  197.50   19.41
  -1   7 -12   25.45    3.67
  -1  -7 -12   19.13    8.18
  -1  -7 -13    7.91    7.33
  -1   7 -13    4.95    2.71
  -1   7 -14   84.02    8.75
  -1  -7 -14   58.99   11.53
  -1  -7 -15  138.63   19.95
  -1   7 -15  186.35   18.18
  -1  -7 -16   -1.18    8.15
  -1   7 -16   11.82    3.40
  -1  -7 -17   49.00   10.72
  -1   7 -17   67.16    7.51
  -1  -7 -18    9.13    9.36
  -1   7 -18    9.92    3.70
  -1  -7 -19   50.06   10.87
  -1   7 -19   44.56    5.95
  -1   7 -19   36.03    7.70
  -1   7 -20    7.00    3.91
  -1  -7 -20    4.57   10.01
  -1   7 -21   47.45    6.61
  -1  -7 -21   44.60   11.70
  -1   7 -22    1.76    4.19
  -1  -7 -22    9.10   10.72
  -1   7 -23    2.01    4.51
  -1  -7 -23   -3.06   11.29
   1  -8 -23    3.16   10.94
   1   8 -23   14.80    4.91
   1   8 -22    3.14    4.38
   1  -8 -22    4.87   10.83
   1  -8 -21   12.71   10.42
   1   8 -21    2.96    3.89
   1   8 -20   44.99    5.92
   1  -8 -20   25.51   11.02
   1  -8 -19   65.82   13.42
   1   8 -19   94.92   10.01
   1   8 -18   46.98    6.07
   1  -8 -18   41.62   10.80
   1   8 -17    8.97    3.54
   1  -8 -17   18.03    9.06
   1   8 -16    9.53    3.31
   1  -8 -16    5.15    8.31
   1  -8 -15   25.07    9.51
   1   8 -15   46.45    5.55
   1   8 -14   10.28    3.22
   1  -8 -14   15.26    8.42
   1  -8 -13   41.29    9.78
   1   8 -13   53.57    6.14
   1  -8 -12   -2.38    7.48
   1   8 -12   -1.32    2.74
   1  -8 -11   13.57    7.93
   1   8 -11   15.93    3.07
   1   8 -10   35.86    4.33
   1  -8 -10   22.90    7.96
   1   8  -9   71.82    7.73
   1   8  -8   22.65    3.34
   1   8  -7  209.69   21.18
   1   8  -6  310.92   26.89
  -1   8   6  190.98   28.49
   1  -8  -6  239.96   27.61
   1   8  -6  230.31   27.70
  -1  -8   6  226.72   28.72
   1  -8  -5  126.33   13.45
   1  -8  -5  110.63   13.04
   1   8  -5  128.83   13.15
  -1  -8   5  105.46   14.69
  -1   8   5   94.37   14.21
  -1  -8   4   50.23    8.87
   1   8  -4   53.68    7.00
   1  -8  -4   60.26    7.08
   1  -8  -4   43.73    7.80
  -1   8   4   42.03    5.63
  -1   8   4   43.63    8.96
  -1  -8   3  523.82   57.63
  -1  -8   3  736.05   58.98
   1  -8  -3  600.96   57.72
  -1   8   3  495.03   57.63
  -1   8   3  591.14   57.69
   1   8  -3  654.29   57.75
   1  -8  -3  636.20   58.22
  -1  -8   2   96.53   12.17
   1  -8  -2   69.50   10.09
  -1   8   2   81.30    8.26
  -1   8   2   73.24    7.93
   1  -8  -1 1005.46  108.36
  -1  -8   1 1075.60  108.61
   1   8  -1 1090.52  107.96
  -1   8   1 1118.66  107.99
   1   8   0  122.41   12.97
  -1   8   0  129.70   12.97
  -1  -8   0  117.27   14.84
   1  -8   0  124.32   14.38
   1   8   1  490.14   49.31
  -1  -8  -1  493.33   50.05
   1  -8   1  501.45   49.94
   1   8   2  602.86   66.01
  -1  -8  -2  707.84   66.66
   1  -8   2  655.77   65.79
   1   8   2  675.19   65.80
   1  -8   2  734.86   66.68
   1  -8   3   32.99    8.33
   1  -8   3   34.40    3.71
  -1  -8  -3   23.45    7.43
   1   8   3   27.64    3.60
   1   8   3   24.03    4.15
   1  -8   4  394.93   39.40
   1   8   4  345.30   37.99
  -1  -8  -4  329.67   38.88
   1  -8   4  433.59   38.05
  -1   8  -5   87.54    9.29
  -1   8  -6    9.44    2.65
  -1  -8  -7  255.58   30.30
  -1   8  -7  304.41   29.46
  -1   8  -8   16.80    3.01
  -1  -8  -8   14.01    6.75
  -1   8  -9   99.83   10.23
  -1  -8  -9   84.36   12.41
  -1   8 -10   43.30    5.20
  -1  -8 -10   41.55    9.00
  -1   8 -11    3.90    2.69
  -1  -8 -11    7.95    7.76
  -1   8 -12   14.47    3.24
  -1  -8 -12   12.84    8.19
  -1  -8 -13   26.21    9.00
  -1   8 -13   31.06    4.38
  -1   8 -14   75.10    8.26
  -1  -8 -14   67.08   11.77
  -1   8 -15   34.58    4.84
  -1  -8 -15   32.24    9.61
  -1   8 -16    5.27    3.29
  -1  -8 -16  -12.83    8.80
  -1   8 -17   27.25    4.45
  -1  -8 -17   17.04    9.83
  -1   8 -18    2.93    3.65
  -1  -8 -18   -2.75    9.63
  -1  -8 -19   18.01   10.27
  -1   8 -19   15.34    4.19
  -1  -8 -20   16.41   10.59
  -1   8 -20   13.61    4.30
  -1   8 -21   -0.66    4.25
  -1  -8 -21    6.32   10.52
  -1  -8 -22   29.50   11.79
  -1   8 -22   24.01    5.29
   1   9 -22    4.97    4.44
   1  -9 -22   -2.16   10.80
   1   9 -21   24.06    5.08
   1  -9 -21   37.25   11.15
   1  -9 -20   -6.12    9.86
   1   9 -20    4.19    3.95
   1  -9 -19    9.39   10.36
   1   9 -19   21.04    4.46
   1   9 -18   11.92    3.92
   1  -9 -18    1.92    9.86
   1  -9 -17   13.00    9.40
   1   9 -17   21.56    4.15
   1  -9 -16   96.85   16.33
   1   9 -16  139.51   13.88
   1   9 -15  172.35   17.30
   1  -9 -15  147.26   19.41
   1  -9 -14   38.89   10.48
   1   9 -14   59.80    6.72
   1   9 -13   17.79    3.54
   1  -9 -13    9.74    8.79
   1  -9 -12  132.63   18.35
   1   9 -12  166.03   16.46
   1   9 -11   35.89    4.69
   1  -9 -11   26.22    8.96
   1   9 -10   67.90    7.13
   1  -9 -10   37.30   10.14
   1   9  -9    2.42    2.66
   1   9  -8   44.30    5.33
  -1  -9   7   -0.21   11.05
   1   9  -7    1.18    2.61
  -1   9   7  -10.42    9.59
   1  -9  -7    8.62    7.14
   1   9  -6   -3.78    2.55
  -1  -9   6   -1.41    9.60
   1   9  -6   -0.76    5.85
   1  -9  -6   -3.46    6.57
  -1   9   6   -0.95    8.50
   1  -9  -6    1.99    6.13
  -1   9   5  184.54   22.88
   1   9  -5  221.86   21.71
   1  -9  -5  206.51   21.77
   1  -9  -5  203.42   22.22
  -1  -9   5  214.41   23.32
  -1   9   4   50.16    5.89
   1  -9  -4   67.52    8.52
  -1  -9   4   49.29    7.02
  -1   9   4   38.87    7.01
  -1  -9   3    6.62    9.54
  -1   9   3   -0.08    2.73
  -1   9   3    0.62    2.95
  -1  -9   3    1.00    2.71
   1  -9  -3    5.66    6.64
   1  -9  -2    3.15    6.65
  -1   9   2    9.23    2.75
  -1  -9   2   14.79    9.51
  -1   9   1   61.43    7.66
  -1  -9   1   81.67   11.49
   1   9  -1   74.04    7.67
   1  -9  -1   73.09   10.02
  -1  -9   0  290.54   30.53
   1   9   0  286.46   29.25
   1  -9   0  267.11   30.13
  -1   9   0  300.82   29.24
   1   9   1  727.02   74.21
  -1  -9  -1  757.13   74.91
   1  -9   1  778.28   74.86
  -1  -9  -2  116.86   13.44
   1   9   2  102.68   11.28
   1  -9   2  123.12   13.48
   1  -9   3  149.12   15.73
   1  -9   3  135.79   12.77
   1   9   3  127.63   12.77
   1   9   3  101.52   13.00
  -1  -9  -3  120.81   14.90
   1  -9   4   95.15    8.21
   1  -9   4   88.17   12.57
  -1  -9  -4   76.26   11.15
   1   9   4   73.15    8.13
   1   9   4   60.08    8.32
  -1   9  -5  542.59   49.29
   1  -9   5  535.69   49.18
   1   9   5  426.92   49.13
  -1   9  -6   28.71    4.07
  -1   9  -7   42.00    5.12
  -1  -9  -8    9.11    7.50
  -1   9  -8    5.43    2.79
  -1   9  -9    5.75    2.85
  -1  -9  -9  -10.10    8.12
  -1   9 -10   15.52    3.34
  -1  -9 -10   24.23    8.39
  -1   9 -11   63.25    7.10
  -1  -9 -11   56.85   11.07
  -1   9 -12   32.17    4.59
  -1  -9 -12   31.60   10.00
  -1   9 -13    5.50    3.12
  -1  -9 -13   11.47    8.52
  -1  -9 -14   17.67    9.12
  -1   9 -14   18.83    3.78
  -1  -9 -15   45.37   10.42
  -1   9 -15   45.32    5.82
  -1  -9 -16  158.85   20.85
  -1   9 -16  182.47   18.46
  -1  -9 -17   88.73   14.99
  -1   9 -17  108.97   11.51
  -1   9 -18    2.09    3.84
  -1  -9 -18    9.10    9.96
  -1  -9 -19    5.84   10.66
  -1   9 -19   10.89    4.17
  -1   9 -20    0.25    4.18
  -1  -9 -20   -1.57   10.90
  -1   9 -21    1.47    4.28
  -1  -9 -21    9.46   11.69
  -1   9 -22   14.88    4.89
  -1  -9 -22    9.47   12.11
   1 -10 -21   -1.11   11.27
   1  10 -21    4.97    4.43
   1  10 -20   32.50    5.68
   1 -10 -20   34.92   11.82
   1 -10 -19    2.90   10.80
   1  10 -19   31.49    5.19
   1 -10 -18   15.36   10.74
   1  10 -18   -0.92    3.82
   1 -10 -17   -9.45   10.10
   1  10 -17   -1.43    3.74
   1 -10 -16    3.38    9.53
   1  10 -16   -0.21    3.52
   1 -10 -15   13.57    9.45
   1  10 -15   11.12    3.55
   1  10 -14  107.43   11.40
   1 -10 -14  102.71   14.38
   1  10 -13   20.27    3.94
   1 -10 -13   28.44    9.15
   1  10 -12   12.81    3.54
   1 -10 -12   13.88    8.96
   1  10 -11    0.43    3.13
   1 -10 -11    5.38    8.73
   1  10 -10   42.40    5.50
   1  10  -9    3.34    3.12
  -1 -10   9    2.37   13.62
  -1  10   9    8.25   12.19
  -1 -10   8    5.39   12.15
  -1  10   8    6.37   10.71
   1  10  -8   13.78    3.28
  -1 -10   7  120.07   20.64
   1 -10  -7  167.29   19.21
  -1  10   7  102.43   19.73
   1  10  -7  190.95   17.44
  -1 -10   6  143.97   19.29
  -1  10   6  127.18   18.43
   1 -10  -6  124.02   17.35
   1  10  -6  164.52   15.71
   1 -10  -5   -4.09    7.30
  -1 -10   5    9.22    6.25
  -1  10   5    8.21    2.96
  -1  10   5    4.99    5.82
  -1  10   4  244.55   22.50
  -1 -10   4  221.12   22.45
  -1  10   4  190.18   22.41
   1 -10  -4  269.19   23.99
  -1  10   3  668.13   65.91
   1 -10  -3  755.55   66.69
  -1 -10   3  802.57   67.58
  -1  10   3  638.53   65.61
   1 -10  -2    7.46    7.54
  -1 -10   2   14.93   10.61
  -1  10   2    4.49    3.05
  -1 -10   1  113.82   15.37
  -1  10   1  122.08   12.50
   1 -10  -1  108.74   14.35
  -1 -10   0    3.47    8.51
   1  10   0    7.62    3.06
   1 -10   0   -0.88    7.38
   1 -10   1  206.32   22.80
  -1 -10  -1  208.86   23.08
   1  10   1  211.62   21.42
  -1 -10  -2    7.17    8.00
   1 -10   2    4.94    8.37
   1  10   2    6.94    2.95
   1 -10   3  160.69   18.30
   1  10   3  170.54   18.27
   1  10   3  197.95   17.91
   1  10   3  119.14   18.22
   1 -10   3  183.80   17.89
   1 -10   3  238.94   20.94
  -1 -10  -3  207.86   20.12
   1  10   4   29.89    3.91
   1  10   4   26.07    4.38
   1 -10   4   36.54    4.01
   1 -10   4   28.95   10.47
  -1 -10  -4   27.98    8.87
  -1 -10  -5   11.70    8.43
   1 -10   5    2.88    2.68
   1  10   5    2.84    3.04
   1 -10   5    9.84   10.78
   1  10   5    1.05    2.56
  -1  10  -5   -0.27    2.81
   1 -10   6  109.74   10.28
  -1  10  -6   98.76   10.34
   1  10   6   81.36   10.18
  -1  10  -7   18.40    3.71
  -1 -10  -8    1.02    8.65
  -1  10  -8    6.41    3.24
  -1  10  -9   54.32    6.12
  -1 -10  -9   20.02   10.13
  -1 -10 -10   15.58    9.01
  -1  10 -10   23.14    4.10
  -1 -10 -11   14.28    9.35
  -1  10 -11   24.43    4.13
  -1 -10 -12  114.71   15.44
  -1  10 -12  117.72   12.46
  -1 -10 -13   82.19   14.27
  -1  10 -13  102.03   10.73
  -1 -10 -14   24.89   10.14
  -1  10 -14   24.63    4.39
  -1  10 -15   17.27    4.08
  -1 -10 -15   11.73   10.34
  -1  10 -16   27.92    4.70
  -1 -10 -16   24.16   11.11
  -1  10 -17    8.68    4.10
  -1 -10 -17   15.27   10.85
  -1  10 -18    6.22    4.02
  -1 -10 -18    1.60   10.94
  -1  10 -19   15.71    4.58
  -1 -10 -19   19.70   11.70
  -1  10 -20  100.30   11.09
  -1 -10 -20   81.84   15.73
  -1  10 -21    2.08    4.41
  -1 -10 -21    4.05   11.78
   1 -11 -21   -8.85   11.88
   1  11 -21   14.34    4.84
  -1 -11  21   15.28   29.64
   1 -11 -20   20.99   12.12
   1  11 -20   18.56    5.02
  -1 -11  20    5.27   27.75
   1 -11 -19    9.25   11.74
   1  11 -19   23.74    4.99
  -1 -11  19   18.68   27.06
  -1  11  19   30.58   25.89
   1  11 -18    5.62    4.16
   1 -11 -18   13.63   10.95
  -1 -11  18   14.65   25.50
  -1  11  18    4.47   23.44
   1 -11 -17   37.17   11.15
   1  11 -17   33.73    5.38
  -1 -11  17   24.15   23.61
   1  11 -16   41.68    5.58
   1 -11 -16   10.35   11.37
   1  11 -15    3.31    3.57
   1 -11 -15   -1.76    9.91
  -1 -11  14   -0.87   19.62
   1 -11 -14   -6.87    9.73
   1  11 -14    1.86    3.54
  -1 -11  13   -5.89   17.36
  -1  11  13    6.00   16.33
   1 -11 -13    4.55    9.48
   1  11 -13   -2.32    3.42
   1  11 -12   19.81    3.95
  -1 -11  12    3.18   16.99
  -1  11  12   -2.19   15.07
   1 -11 -12    9.35    9.40
   1  11 -11  132.90   12.66
  -1 -11  11   45.48   19.83
  -1  11  11   76.59   18.49
   1 -11 -11  101.25   15.55
  -1  11  10   80.31   21.29
  -1 -11  10  113.01   22.93
  -1 -11   9   16.76   14.15
  -1  11   9   17.10   12.19
   1  11  -9   38.75    5.27
  -1 -11   8   15.76   13.77
  -1  11   8   11.00   10.87
   1 -11  -8    8.34    8.82
   1  11  -8    5.18    3.44
  -1 -11   7    3.89   11.43
   1 -11  -7    7.94    8.54
   1  11  -7   13.65    3.69
  -1  11   7   10.55   10.74
   1 -11  -6   16.91    8.78
   1  11  -6   23.45    4.06
  -1 -11   6   11.00    7.66
  -1  11   6   14.94    7.02
  -1  11   5  103.03   10.38
  -1  11   5   72.28   10.70
  -1 -11   5  102.66   10.86
   1 -11  -5  128.94   13.55
  -1 -11   4    4.72    1.74
   1 -11  -4    4.19    8.52
  -1 -11   4    4.62    2.62
  -1  11   4    4.03    2.93
  -1  11   4    7.26    3.40
  -1  11   3   24.81    4.22
  -1 -11   3   26.26   12.64
   1 -11  -3   39.80    9.12
   1 -11  -2   16.74    8.84
  -1  11   2   10.71    3.49
  -1 -11   2   25.21   12.01
  -1  11   1  103.82   11.16
  -1 -11   1  115.56   15.51
   1 -11  -1   94.65   13.93
  -1 -11   0   29.82   10.18
   1  11   0   34.61    5.02
   1 -11   0   40.01    9.27
   1  11   1    8.53    3.44
   1 -11   1    3.46    8.86
  -1 -11  -1   21.11    9.75
   1  11   2   29.13    4.56
  -1 -11  -2   36.04    9.41
   1 -11   2   37.99   10.11
   1  11   3   -0.63    2.90
  -1 -11  -3   10.44    8.79
   1 -11   3   -5.86   10.46
  -1 -11  -4  124.37   14.94
   1  11   4   87.75   11.67
   1 -11   4  108.06   12.65
   1 -11   4  132.59   11.36
   1 -11   4  121.66   17.09
   1  11   4   74.27   12.17
   1 -11   5   72.16    6.80
  -1 -11  -5   69.91   11.74
   1  11   5   45.44    6.92
   1 -11   5   53.78   13.90
   1 -11   6   66.54    6.88
   1  11   6   40.93    6.83
  -1  11  -6   73.55    7.17
  -1  11  -7   -1.50    3.44
  -1  11  -8    4.60    3.54
  -1 -11  -9   41.73   10.62
  -1  11  -9   30.54    4.98
  -1 -11 -10   74.65   14.04
  -1  11 -10   96.27   10.23
  -1 -11 -11  143.44   21.01
  -1  11 -11  192.43   18.89
  -1 -11 -12   14.69    9.75
  -1  11 -12    5.60    3.53
  -1  11 -13   12.88    3.86
  -1 -11 -13    0.49    9.88
  -1 -11 -14   17.71   10.45
  -1  11 -14    7.56    3.82
  -1  11 -15    7.16    3.96
  -1 -11 -15   15.86   10.75
  -1  11 -16   10.33    4.09
  -1 -11 -16   -1.34   10.89
  -1  11 -17   25.51    4.98
  -1 -11 -17   21.68   12.01
  -1  11 -18    2.85    4.14
  -1 -11 -18   21.17   11.19
  -1 -11 -19    8.39   11.84
  -1  11 -19   23.05    5.14
  -1  11 -20   -3.14    4.65
  -1 -11 -20   -9.76   12.19
   1 -12 -20   24.04   13.16
  -1 -12  20   20.88   28.42
   1  12 -20   15.03    4.96
   1  12 -19   -0.40    4.57
   1 -12 -19    1.81   12.15
  -1 -12  19   -0.59   26.68
   1 -12 -18    6.47   11.92
  -1 -12  18   -0.55   24.12
   1  12 -18   17.00    4.62
  -1 -12  17   27.15   22.30
   1  12 -17   17.85    4.68
   1 -12 -17   -1.15   11.46
  -1 -12  16   10.43   21.38
   1  12 -16    8.56    4.08
   1 -12 -16  -14.56   11.63
   1  12 -15   33.92    5.49
  -1 -12  15   17.13   20.70
   1 -12 -15   40.67   11.65
   1  12 -14    5.19    3.72
   1 -12 -14    0.27   10.37
  -1 -12  13   48.83   20.89
   1  12 -13  113.30   11.51
   1 -12 -13   84.06   15.02
  -1 -12  12   10.56   15.50
   1  12 -12   -0.75    3.68
   1 -12 -12    7.56    9.84
  -1 -12  11    6.67   14.58
   1  12 -11    2.49    3.82
   1  12 -10    6.17    3.78
  -1 -12  10    2.34   14.83
  -1 -12   9   11.44   15.07
   1  12  -9   14.02    4.15
   1  12  -8   70.94    7.69
  -1 -12   8   45.27   13.08
   1 -12  -8   38.88   11.48
   1 -12  -7   17.68    9.82
   1  12  -7   17.41    4.42
  -1 -12   7   15.09    8.21
  -1  12   6    3.15    3.27
   1 -12  -6   12.13    9.70
  -1 -12   6    5.34    5.47
  -1 -12   5    3.08    3.48
  -1 -12   5    6.41    2.08
  -1  12   5   -0.39    3.24
  -1  12   4   26.17    4.32
   1 -12  -4   27.18    9.99
  -1  12   3   90.72   10.06
  -1 -12   3   92.02   16.76
   1 -12  -3  101.24   13.89
  -1  12   2    3.64    3.56
  -1 -12   2   -4.82   12.67
   1 -12  -2  -21.29    9.70
   1 -12  -1    5.17    8.60
  -1 -12   1   16.05   12.05
  -1  12   1    4.98    3.48
   1 -12   0   33.66   10.11
   1  12   0   28.43    4.81
  -1 -12   0   49.36   12.14
   1 -12   1   14.05   10.38
  -1 -12  -1    2.68   10.59
   1  12   1    3.15    3.42
  -1 -12  -2   14.64   10.02
   1  12   2    2.19    3.22
   1 -12   2   10.71   11.43
   1  12   3  138.90   14.80
  -1 -12  -3  159.23   17.96
   1 -12   3  136.50   19.30
  -1 -12  -4   56.86   11.86
   1 -12   4   62.18   14.46
   1  12   4   55.02    6.68
   1 -12   5    5.32    2.60
   1 -12   5    3.89    7.57
  -1 -12  -5   -7.42   10.02
   1  12   5    5.73    3.38
   1 -12   5   -7.25   13.84
   1  12   6   82.34   12.69
   1 -12   6   73.65   14.65
  -1 -12  -6  117.27   16.37
  -1  12  -6  174.31   13.18
   1 -12   6  137.18   12.60
   1  12   7   -1.76    3.51
  -1  12  -7    0.22    3.91
  -1  12  -8    1.76    3.89
   1  12   8    2.91    3.39
  -1  12  -9  131.06   12.88
  -1 -12  -9   65.38   15.99
  -1 -12 -10   23.10   10.65
  -1  12 -10   39.71    5.57
  -1  12 -11   30.06    4.87
  -1 -12 -11   22.46   10.69
  -1 -12 -12    6.36   10.51
  -1  12 -12   10.06    4.04
  -1 -12 -13   46.50   12.39
  -1  12 -13   56.31    7.09
  -1 -12 -14   -5.76   11.04
  -1  12 -14    3.58    3.89
  -1 -12 -15   33.30   11.94
  -1  12 -15   30.37    5.33
  -1 -12 -16   -8.28   11.55
  -1  12 -16    2.90    4.19
  -1 -12 -17    6.43   11.42
  -1  12 -17    7.90    4.38
  -1  12 -18    0.14    4.46
  -1 -12 -18  -12.55   12.65
  -1  12 -19   41.35    6.56
  -1 -12 -19   42.79   13.66
  -1 -12 -20    9.07   13.23
  -1  12 -20   22.14    5.41
   1 -13 -19   40.86   14.09
   1  13 -19   52.39    7.41
   1  13 -18    1.37    4.48
   1 -13 -18  -16.12   12.63
   1  13 -17   38.80    6.04
   1 -13 -17   21.53   12.76
   1  13 -16    6.66    4.47
   1 -13 -16   17.49   11.72
  -1 -13  16   10.20   21.71
  -1 -13  15   -9.50   20.58
   1  13 -15   -0.87    4.35
   1 -13 -15   -9.83   11.21
   1 -13 -14   19.16   11.51
  -1 -13  14    7.20   19.35
   1  13 -14   23.21    4.85
   1  13 -13   17.58    4.76
  -1 -13  13   31.12   18.48
   1 -13 -13   16.21   11.35
   1  13 -12   -1.56    4.12
  -1 -13  12   13.67   17.90
  -1  13  12   -4.75    4.10
   1 -13 -12   -0.54   10.58
  -1  13  11   38.88    7.27
  -1 -13  11   43.30   18.22
  -1 -13  10   -8.57   14.50
   1  13 -10    3.81    4.15
   1  13  -9   19.41    4.37
  -1 -13   9    8.51   10.12
  -1 -13   8    4.94    7.61
   1  13  -8    3.53    3.95
   1 -13  -8  -13.00   10.02
  -1 -13   7   75.22   12.42
   1 -13  -7  100.50   15.56
   1 -13  -6    9.70   10.16
  -1  13   6    2.84    3.61
  -1 -13   6    3.85    3.98
  -1  13   5   13.52    3.89
   1 -13  -5   12.76   10.40
   1 -13  -4   13.28   10.72
  -1  13   4   12.22    3.73
  -1  13   3  158.95   16.63
   1 -13  -3  150.81   19.48
  -1 -13   3  183.68   22.84
  -1  13   2  213.81   21.79
  -1 -13   2  226.19   26.51
   1 -13  -2  196.76   24.21
   1 -13  -1   32.45   10.95
  -1 -13   1   44.48   14.28
  -1 -13   0   -6.87   12.36
   1 -13   0   12.98   10.82
   1 -13   1    7.85   11.39
  -1 -13  -1   -0.27   11.95
   1  13   1    2.04    3.73
   1  13   2    1.34    3.53
  -1 -13  -2   12.05   11.13
   1 -13   2    3.82   12.31
  -1 -13  -3   24.34   11.75
   1 -13   3   45.07   14.68
   1  13   3   37.41    5.21
  -1 -13  -4   18.17   11.54
   1  13   4   34.21    4.92
   1 -13   4   36.29   15.20
  -1 -13  -5    0.52   11.08
   1 -13   5    4.76   14.05
   1  13   5   14.74    3.74
  -1 -13  -6   48.94   11.55
   1  13   6   24.83    4.77
  -1  13  -6   41.99    5.58
   1 -13   6   29.71    8.56
   1  13   7   17.43    4.34
   1 -13   7   21.07    9.27
  -1  13  -7   41.55    5.22
   1 -13   8    0.33    9.98
  -1  13  -8    6.56    4.12
   1  13   8   -3.89    3.77
  -1  13  -9   66.90    6.50
   1  13   9   29.76    5.87
  -1 -13 -10    0.28   10.90
  -1  13 -10   -3.97    4.03
  -1  13 -11   27.94    5.03
  -1 -13 -11    7.94   11.67
  -1  13 -12   21.14    4.78
  -1 -13 -12   18.74   11.60
  -1  13 -13   74.40    8.74
  -1 -13 -13   54.96   13.94
  -1 -13 -14    5.69   11.87
  -1  13 -14    5.98    4.41
  -1  13 -15   55.45    7.27
  -1 -13 -15   41.00   13.27
  -1 -13 -16    2.79   12.14
  -1  13 -16    2.85    4.38
  -1  13 -17   27.09    5.58
  -1 -13 -17   30.24   13.30
  -1 -13 -18    0.32   13.36
  -1  13 -18    5.10    4.81
  -1  13 -19   67.81    8.74
  -1 -13 -19   58.94   15.36
   1  14 -18   30.11    5.95
   1 -14 -18   14.39   13.63
   1 -14 -17    5.76   12.93
   1  14 -17    0.42    4.71
   1 -14 -16    3.14   12.24
   1  14 -16    2.07    4.66
   1 -14 -15   -3.69   12.07
   1  14 -15    2.03    4.57
   1 -14 -14   35.94   12.58
   1  14 -14   34.97    5.31
  -1  14  14    8.68    4.91
   1 -14 -13   77.71   14.52
  -1  14  13   51.04    8.99
   1 -14 -12   14.85   11.49
  -1  14  12    8.63    4.33
   1  14 -12   11.53    4.68
   1  14 -11   95.55   10.99
   1  14 -10   18.71    4.96
   1 -14  -9  112.37   18.70
   1  14  -9  153.48   15.58
   1 -14  -8    9.13   11.00
   1  14  -8   16.31    4.88
   1  14  -7    1.68    4.44
   1 -14  -7   -2.21   10.55
  -1  14   7   -3.04    3.51
   1 -14  -6   18.89   10.85
  -1  14   6   17.09    3.92
  -1  14   5   -1.98    3.31
   1 -14  -5   -1.89   10.35
  -1  14   4    6.29    3.59
   1 -14  -4    8.93   10.63
  -1 -14   3    9.57   15.43
   1 -14  -3   -0.77   10.04
  -1  14   3    4.73    3.95
  -1  14   2   -0.67    3.53
   1 -14  -2   -5.96   10.59
  -1 -14   2   17.45   14.27
   1 -14  -1   21.69   11.29
  -1 -14   1   20.97   14.27
  -1 -14   0   -8.60   13.54
   1 -14   0   -3.22   11.70
   1  14   1   42.64    6.07
  -1 -14  -1   46.52   13.16
   1 -14   1   63.67   13.25
   1  14   2   11.10    3.87
  -1 -14  -2    5.72   12.00
   1 -14   2    2.45   13.01
  -1 -14  -3  215.45   22.39
   1 -14   3  248.54   24.46
   1  14   3  168.51   18.62
   1  14   4   22.88    4.32
   1 -14   4   27.96   14.36
  -1 -14  -4   22.44   11.48
  -1 -14  -5   -6.14   11.14
   1  14   5    5.29    3.48
   1  14   6    0.42    3.29
  -1  14  -6    7.37    4.42
  -1 -14  -6    6.20   11.10
  -1  14  -7   28.18    5.13
  -1 -14  -7   21.57   11.46
   1  14   7   13.15    3.98
   1  14   8   -1.98    3.67
  -1  14  -8    2.13    4.46
  -1  14  -9   34.27    5.41
   1  14   9   15.68    4.76
   1  14  10    5.05    3.85
  -1  14 -10    7.07    4.45
  -1  14 -11   27.52    5.07
   1  14  11    7.21    4.38
  -1 -14 -11   16.77   12.71
  -1  14 -12   17.24    4.96
  -1 -14 -12   22.06   12.77
  -1 -14 -13   31.12   13.06
  -1  14 -13   38.98    6.20
  -1  14 -14    0.14    4.52
  -1 -14 -14   -4.84   12.89
  -1  14 -15    7.41    4.73
  -1 -14 -15   -7.88   13.17
  -1 -14 -16   11.69   13.81
  -1  14 -16   -4.23    4.87
  -1  14 -17   -2.24    4.70
  -1 -14 -17  -22.43   14.24
  -1  14 -18   22.34    5.63
  -1 -14 -18    8.31   14.48
   1 -15 -17   52.48   15.16
  -1  15  16    8.28    5.51
   1 -15 -16   18.90   14.06
   1  15 -16   26.44    5.64
   1 -15 -15    3.33   13.25
   1  15 -15   -2.34    5.03
  -1  15  15   -4.07    4.62
   1  15 -14    2.03    4.75
   1 -15 -14   -7.90   12.86
  -1  15  14    0.55    4.69
  -1  15  13    4.56    4.45
   1 -15 -13   13.98   12.51
   1  15 -13    9.91    5.00
   1  15 -12    5.56    4.87
  -1  15  12    6.85    4.16
   1  15 -11   11.92    4.96
   1  15 -10   11.23    5.08
   1 -15 -10    4.63   12.04
   1 -15  -9   13.16   12.28
   1  15  -9   -1.11    4.69
   1 -15  -8  -11.22   12.13
   1  15  -8    3.10    4.77
   1 -15  -7   15.25   11.80
  -1  15   7   14.20    4.27
   1  15  -7   36.28    5.47
  -1  15   6   -1.09    3.67
   1 -15  -6    6.50   11.48
  -1  15   5   10.76    3.76
   1 -15  -5   14.86   11.11
  -1  15   4   26.41    4.76
   1 -15  -4   16.02   11.53
  -1 -15   3   16.98   16.01
   1 -15  -3    1.12   11.04
  -1  15   3   10.54    3.85
  -1 -15   2   77.91   18.33
   1 -15  -2   67.90   13.94
  -1 -15   1   35.07   16.00
   1 -15  -1   55.89   13.22
  -1 -15   0   21.73   14.32
   1 -15   0   10.37   12.55
  -1 -15  -1  126.54   20.16
   1 -15   1  147.02   19.69
  -1 -15  -2   45.29   13.52
   1 -15   2   33.18   15.48
   1  15   2   33.20    5.39
   1 -15   3   21.03   15.67
   1  15   3   26.76    4.91
  -1 -15  -3   47.76   12.48
  -1 -15  -4   13.17   12.34
   1 -15   4   22.80   16.16
   1  15   4    6.49    3.67
   1  15   5    2.48    3.54
  -1 -15  -5    1.83   12.07
  -1  15  -6   40.28    5.88
   1  15   6   20.72    4.78
  -1 -15  -6   46.09   12.51
   1  15   7   60.16    9.58
  -1 -15  -7   93.08   15.69
  -1  15  -8   -1.59    4.86
   1  15   8    3.74    3.60
  -1  15  -9   20.37    5.28
   1  15   9    8.46    3.98
   1  15  10   16.54    4.98
  -1 -15 -10   17.45   13.72
  -1  15 -10   45.38    6.04
   1  15  11   11.50    4.83
  -1 -15 -11   22.71   13.53
  -1  15 -11   21.22    5.38
  -1  15 -12    3.29    5.07
   1  15  12    5.91    4.36
  -1 -15 -12   14.28   13.40
  -1 -15 -13    6.90   13.62
  -1  15 -13   32.03    5.99
  -1  15 -14   18.42    5.32
  -1 -15 -14    2.10   13.95
  -1  15 -15    4.32    4.99
  -1 -15 -15    5.68   13.87
  -1 -15 -16   14.38   14.42
  -1  15 -16   17.04    5.60
  -1  16  15    8.14    4.99
   1  16 -15    5.67    5.23
   1 -16 -15   23.23   14.20
   1  16 -14   20.90    5.65
   1 -16 -14   19.01   13.91
  -1  16  14    8.92    4.80
  -1  16  13   11.03    4.61
   1  16 -13   25.45    5.62
   1 -16 -13   13.91   13.84
   1  16 -12    3.55    5.37
  -1  16  12    0.12    4.12
   1  16 -11   79.27    9.99
   1  16 -10    4.39    5.24
   1 -16 -10   -7.38   12.82
   1  16  -9    1.35    5.00
   1 -16  -9   -6.29   12.86
   1 -16  -8   -8.46   13.36
   1  16  -8    4.09    5.22
   1 -16  -7   40.92   13.31
  -1  16   7   28.31    5.75
  -1  16   6    4.91    3.78
   1 -16  -6   10.23   12.43
   1  16  -6    5.54    5.03
   1 -16  -5   27.76   12.49
  -1  16   5    9.40    4.19
   1 -16  -4    9.73   11.96
  -1  16   4    5.79    3.96
  -1 -16   3   32.34   17.87
  -1  16   3   32.05    5.37
   1 -16  -3   15.30   12.84
  -1 -16   2   69.31   18.69
   1 -16  -2   56.68   14.35
   1 -16  -1   -6.89   12.62
  -1 -16   1   13.08   16.95
  -1 -16   0   -8.36   16.22
   1 -16   0    8.88   13.87
   1 -16   1    2.83   14.78
  -1 -16  -1    9.73   15.13
   1 -16   2   12.19   15.69
   1  16   2    8.69    3.89
  -1 -16  -2   10.45   14.14
   1  16   3   47.60    6.41
  -1 -16  -3   41.62   14.49
   1 -16   3   51.21   17.49
  -1 -16  -4   38.57   13.76
   1 -16   4   35.87   18.09
   1  16   4   22.99    4.73
  -1 -16  -5    9.59   12.77
   1  16   5    9.16    3.96
   1  16   6    2.57    3.74
  -1  16  -6    7.79    5.14
  -1  16  -7   45.14    6.17
   1  16   7   14.59    4.70
  -1 -16  -7   44.16   13.75
  -1 -16  -8    9.28   12.70
  -1  16  -8    7.77    5.32
   1  16   8   -1.26    3.87
  -1  16  -9   23.55    5.69
   1  16   9   10.95    4.14
   1  16  10    0.35    3.87
  -1  16 -10   -3.07    5.39
  -1  16 -11    9.36    5.51
  -1 -16 -11   11.96   13.54
   1  16  11    1.24    4.06
  -1 -16 -12   12.32   13.94
  -1  16 -12    5.65    5.43
   1  16  12    9.07    4.56
   1  16  13   12.65    5.00
  -1 -16 -13    6.62   14.82
  -1  16 -13   25.25    5.73
  -1  16 -14   12.69    5.53
  -1 -16 -14    6.35   14.76
  -1 -16 -15    7.60   15.32
  -1  16 -15    6.47    5.50
  -1  17  13    2.27    4.22
   1  17 -13   -3.31    5.56
   1  17 -12   10.01    6.00
   1  17 -11   -2.95    5.52
   1  17 -10   11.09    5.64
   1 -17 -10   17.56   14.27
   1 -17  -9   -6.31   13.80
   1  17  -9   35.02    6.40
   1  17  -8   -2.26    5.33
  -1  17   8   -3.82    3.97
   1 -17  -8    5.81   13.15
   1  17  -7   29.81    5.86
   1 -17  -7   12.38   13.41
  -1  17   7    6.95    4.23
   1  17  -6    4.79    5.34
   1 -17  -6    0.33   13.28
  -1  17   6    7.33    4.04
   1 -17  -5   14.80   13.50
  -1  17   5   17.57    4.51
   1 -17  -4   19.79   12.61
  -1  17   4    0.36    3.90
   1 -17  -3   -0.67   13.62
   1 -17  -2   22.57   13.84
  -1 -17   2   -5.86   18.79
  -1 -17   1   40.68   18.80
   1 -17  -1   59.24   15.55
   1 -17   0   69.40   16.30
  -1 -17   0   43.49   18.57
  -1 -17  -1   44.20   17.85
   1 -17   1   77.15   18.60
   1 -17   2    5.79   17.38
  -1 -17  -2    1.54   15.38
   1  17   3    2.89    3.98
  -1 -17  -3   26.93   15.47
   1 -17   3   29.02   17.69
   1  17   4   -0.61    4.13
  -1 -17  -4    6.85   14.36
   1 -17   4    8.54   18.34
  -1 -17  -5    5.72   14.26
   1  17   5   -4.30    3.95
   1  17   6   55.25    8.72
  -1 -17  -6   74.75   16.68
  -1 -17  -7   67.71   16.16
   1  17   7   44.28    7.60
  -1 -17  -8    7.12   14.03
   1  17   8    0.82    3.97
  -1  17  -8    5.63    5.65
  -1  17  -9   52.54    7.14
   1  17   9   28.91    5.60
   1  17  10    6.17    4.06
  -1  17 -10    8.32    5.95
  -1 -17 -11   12.93   14.63
   1  17  11    2.22    3.97
  -1  17 -11    1.04    5.72
  -1  17 -12    5.20    5.80
  -1 -17 -12    0.75   14.93
   1  17  12    2.71    4.45
   1  17  13    3.50    4.45
  -1  17 -13   -3.96    5.72
   1 -18 -11   -9.59   15.13
   1  18 -11    6.99    6.02
   1  18 -10   43.67    7.74
   1 -18 -10   46.00   16.06
   1 -18  -9   -0.73   14.55
   1  18  -9   12.79    5.89
   1 -18  -8   -6.84   14.10
  -1  18   8    7.35    4.09
   1  18  -8    4.61    5.76
  -1  18   7   23.88    5.38
   1 -18  -7   32.06   14.42
   1  18  -7   47.85    7.00
   1  18  -6   16.60    5.76
  -1  18   6    9.25    4.21
   1 -18  -5  -11.41   14.11
  -1  18   5   -2.35    3.95
   1 -18  -4    9.30   14.52
   1 -18  -3  122.86   19.75
   1 -18  -2    5.88   14.89
  -1 -18   2  -17.62   19.79
  -1 -18   1  -12.17   18.75
   1 -18  -1    5.00   15.89
   1 -18   0  -13.93   16.85
  -1 -18   0   12.47   18.85
  -1 -18  -1  -20.94   18.27
   1 -18   1   -9.61   17.89
  -1 -18  -2   21.18   17.31
   1 -18   2   32.81   18.35
   1 -18   3   48.91   18.78
  -1 -18  -3   22.71   17.02
  -1 -18  -4   35.52   16.27
   1  18   4   34.39    5.64
   1  18   5    3.27    4.04
  -1  18  -5    8.12    5.59
  -1 -18  -5    3.47   15.55
  -1 -18  -6   45.95   15.86
  -1  18  -6   58.47    7.41
   1  18   6   29.70    5.90
  -1 -18  -7   13.42   15.23
  -1  18  -7   -1.75    5.75
   1  18   7   -0.12    4.01
  -1  18  -8   -0.88    5.90
  -1 -18  -8   12.32   15.41
   1  18   8    2.29    3.95
   1  18   9    6.54    4.31
  -1  18  -9   31.19    6.47
  -1  18 -10    5.34    6.09
   1  18  10    5.17    4.24
  -1  18 -11    4.05    6.21
   1  18  11    3.43    4.27
   1  19  -9    2.52    6.24
   1 -19  -8   17.69   15.88
   1  19  -8  -11.10    6.34
  -1  19   8    4.53    4.25
  -1  19   7   11.80    4.52
   1  19  -7    8.43    6.02
   1  19  -6    9.28    5.92
   1 -19  -6   18.44   15.64
  -1  19   6   -4.04    4.15
   1 -19  -5   -7.30   15.73
   1 -19  -4   11.18   15.83
   1 -19  -3   18.82   16.31
   1 -19  -2    0.41   17.30
  -1 -19   1   48.00   22.29
   1 -19  -1   71.36   18.74
  -1 -19   0   58.75   21.32
   1 -19   0   49.52   19.90
   1 -19   1    7.00   19.55
  -1 -19  -1   -4.89   19.55
  -1 -19  -2   28.26   18.92
   1 -19   2   12.76   19.65
  -1 -19  -3    2.76   18.74
   1 -19   3   36.06   20.66
  -1 -19  -4  -17.32   17.89
   1  19   5    4.81    4.17
  -1  19  -5    5.36    5.75
  -1 -19  -5   23.98   16.95
  -1 -19  -6   21.23   16.99
   1  19   6   17.44    5.21
  -1  19  -6   40.69    6.87
  -1  19  -7    6.97    6.34
  -1 -19  -7   15.22   16.30
   1  19   7   11.92    4.49
  -1  19  -8    3.13    6.27
  -1 -19  -8    0.41   16.76
   1  19   8   -6.47    4.35
   1 -20  -4   19.17   17.21
   1 -20  -3   26.99   18.78
   1 -20  -2    7.25   19.20
   1 -20  -1   -8.19   20.21
  -1 -20   1  -14.82   22.41
  -1 -20   0   13.65   22.09
   1 -20   0    6.40   19.94
   1 -20   1   17.88   21.34
  -1 -20  -1    9.36   21.81
  -1 -20  -2  -41.36   21.61
   1 -20   2   -2.03   21.66
  -1 -20  -3   -4.07   20.49
  -1 -20  -4    7.82   20.49
   2   0 -25    7.38    4.61
   2   0 -24   31.43    5.61
   2   0 -23   -5.57    4.38
   2   0 -22   -0.84    4.06
   2   0 -21    0.51    3.61
   2   0 -21    1.11    8.05
   2   0 -20   11.94    3.45
   2   0 -20   14.91    7.89
   2   0 -19   -3.91    7.31
   2   0 -19   -1.12    2.94
   2   0 -18   73.28   11.33
   2   0 -18   89.93    9.38
   2   0 -17    2.24    2.80
   2   0 -17   -3.50    6.55
   2   0 -16   27.92    3.77
   2   0 -16   11.55    6.93
   2   0 -15   -1.27    2.39
   2   0 -15   -2.87    5.49
   2   0 -14   24.42    3.39
   2   0 -14   24.08    5.89
   2   0 -13    0.84    1.79
   2   0 -13   -3.28    4.66
   2   0 -12    1.68    1.56
   2   0 -12   -2.22    4.21
   2   0 -11    2.13    4.02
   2   0 -11    0.62    1.57
   2   0 -10  240.17   26.73
   2   0 -10  269.84   26.29
   2   0  -9   -0.25    3.53
   2   0  -9    1.55    1.31
   2   0  -8  163.35   17.21
   2   0  -8  168.68   16.78
   2   0  -7   -0.09    1.03
  -2   0   7   -0.31    1.06
  -2   0   6  616.28   62.40
   2   0  -6  640.45   62.41
  -2   0   5    2.53    0.77
   2   0  -5    0.10    0.82
   2   0  -4   18.37    1.98
  -2   0   4   16.06   12.16
  -2   0   3    3.00   10.02
   2   0  -3   -0.37    0.46
   2   0  -3    1.56    7.94
  -2   0   2  477.13   48.66
   2   0  -2  497.59   48.94
  -2   0   1   -1.40    2.64
   2   0  -1   -0.76    2.81
  -2   0   0 8517.22  838.03
   2   0   0 8357.65  838.04
  -2   0  -1    0.40    1.56
   2   0   1    0.10    0.48
   2   0   1   -1.29    1.78
  -2   0  -2   46.72    5.09
   2   0   2   50.45    5.30
   2   0   2   46.73    4.78
   2   0   3    0.91    2.74
  -2   0  -3    0.67    0.91
   2   0   3    0.05    0.95
  -2   0  -4  395.73   38.41
   2   0   4  363.54   38.39
   2   0   4  403.17   38.41
  -2   0  -5   -0.29    1.10
   2   0   5   -0.65    1.20
   2   0   5    0.66    1.76
   2   0   6 2526.67  247.15
  -2   0  -6 2501.40  247.14
   2   0   6 2179.93  247.79
   2   0   7    2.48    8.16
  -2   0  -7   -0.32    1.26
   2   0   8    8.46    9.33
  -2   0  -8   10.03    1.91
   2   0   9   11.56   11.54
  -2   0  -9   -1.21    1.69
   2   0  10    9.25   13.58
  -2   0 -10   27.34    3.37
   2   0  11   -5.36   12.93
  -2   0 -11    1.92    1.86
   2   0  12  261.73   34.63
  -2   0 -12  307.53   30.55
   2   0  13    7.68   17.26
  -2   0 -13   -0.07    2.11
  -2   0 -14    1.84    2.35
   2   0  14   15.98   17.25
  -2   0 -15    0.93    2.52
   2   0  15    1.47   19.80
  -2   0 -16  316.53   31.88
  -2   0 -17   -3.71    3.07
  -2   0 -18   10.96    3.44
  -2   0 -19    0.11    3.51
  -2   0 -20   20.07    4.36
  -2   0 -21    1.30    3.85
  -2   0 -22    4.63    4.18
  -2   0 -23    1.31    4.29
  -2   0 -24   -1.79    4.51
   2   1 -24   58.91    7.82
   2  -1 -23   10.82    4.32
   2   1 -23   16.62    4.35
   2   1 -23   17.43    8.92
   2   1 -22   -0.19    8.04
   2  -1 -22    8.94    3.87
   2   1 -22    4.08    3.66
   2   1 -21    1.76    7.81
   2  -1 -21    1.35    3.67
   2   1 -21    3.97    3.56
   2  -1 -20   55.77    6.86
   2   1 -20   39.37    9.56
   2   1 -20   60.41    6.83
   2   1 -19    9.68    3.20
   2  -1 -19   10.51    3.73
   2   1 -19   10.62    7.10
   2  -1 -18   37.52    4.99
   2   1 -18   20.30    7.31
   2  -1 -18   22.67    8.00
   2   1 -18   38.26    4.75
   2  -1 -17    8.19    7.03
   2   1 -17    4.04    2.89
   2   1 -17    2.00    6.22
   2  -1 -17    8.86    2.87
   2   1 -16   20.54    6.53
   2   1 -16   25.03    3.65
   2  -1 -16   22.53    7.14
   2  -1 -16   24.51    3.66
   2   1 -15   11.77    5.64
   2  -1 -15   18.90    5.86
   2  -1 -15   12.75    2.71
   2   1 -15   14.57    2.76
   2  -1 -14  371.95   36.83
   2  -1 -14  337.04   37.40
   2   1 -14  334.66   37.29
   2   1 -14  388.77   36.85
   2  -1 -13   78.92    8.08
   2  -1 -13   71.09    9.57
   2   1 -13   70.08    9.11
   2   1 -13   78.99    8.11
   2   1 -12  187.91   18.32
   2   1 -12  176.05   18.93
   2  -1 -12  181.86   18.30
   2  -1 -12  166.81   18.96
   2  -1 -11   -0.72    4.42
   2   1 -11    0.37    1.59
   2  -1 -11   -0.46    1.46
   2   1 -11   -1.35    3.69
   2   1 -10  193.09   18.80
   2  -1 -10  184.21   18.77
   2  -1 -10  177.96   19.37
   2  -1  -9   15.38    4.36
   2   1  -9   14.97    2.09
   2  -1  -9   15.34    2.08
   2  -1  -8    7.26    1.42
   2  -1  -8    4.63    3.79
   2   1  -8    6.14    1.44
  -2  -1   7   28.20    3.24
  -2   1   7   30.69    3.25
   2  -1  -7   28.96    3.21
   2   1  -7   31.62    3.22
   2   1  -6  508.26   50.86
  -2   1   6  491.87   50.85
   2  -1  -6  552.85   50.88
  -2  -1   6  503.58   50.85
   2   1  -5   75.65    7.66
  -2   1   5   76.81    7.68
  -2   1   4  452.43   44.77
   2  -1  -4  437.64   44.98
  -2   1   4  461.05   47.08
   2   1  -4  450.72   44.76
   2   1  -3  179.27   23.83
  -2   1   3  275.45   24.94
   2  -1  -3  225.73   22.28
   2   1  -3  221.34   22.05
  -2   1   2 1318.96  146.24
   2  -1  -2 1559.46  146.02
   2   1  -2 1364.13  146.40
  -2   1   1   12.53    3.29
   2  -1  -1   13.76    1.66
   2   1  -1   14.55    3.72
   2  -1  -1   14.41    1.93
  -2   1   0  570.63   57.68
   2   1   0  579.32   57.71
   2  -1   0  583.01   57.58
   2   1   1    1.96    2.05
   2  -1   1    0.27    0.69
  -2   1  -1   -0.15    1.84
   2   1   1   -0.88    2.25
   2   1   1   -0.07    0.51
   2   1   2  394.37   41.04
   2   1   2  426.69   41.21
  -2   1  -2  435.71   41.19
   2  -1   2  416.02   41.05
  -2  -1  -2  413.81   41.18
   2   1   2  441.94   41.18
   2   1   3  948.74   93.85
   2   1   3  881.31   93.77
  -2   1  -3  973.52   93.79
   2   1   3 1049.36   93.97
   2  -1   3  944.91   93.79
  -2  -1  -3  976.63   93.88
  -2  -1  -4  140.58   13.64
   2   1   4  124.25   13.33
  -2  -1  -4  132.73   13.33
   2  -1   4  127.72   13.34
  -2   1  -4  147.00   13.35
  -2   1  -5  330.70   31.56
   2   1   5  293.89   31.55
  -2  -1  -5  323.91   31.57
   2  -1   5  303.51   31.56
  -2   1  -5  337.28   31.58
  -2  -1  -5  318.10   31.72
   2   1   6  143.08   19.74
  -2   1  -6  180.68   17.76
  -2  -1  -6  168.35   17.73
   2   1   6  186.95   17.94
  -2   1  -6  182.18   17.78
   2   1   7    3.05    2.72
  -2   1  -7   -0.57    1.30
  -2  -1  -7   -0.41    1.27
  -2   1  -7    0.48    2.09
   2   1   7   -3.15    8.92
  -2   1  -8    8.27    2.73
   2   1   8    0.72   10.40
  -2   1  -8    3.75    1.66
   2   1   8    8.30    3.12
  -2  -1  -8    6.45    1.63
   2   1   9   21.67    4.13
  -2   1  -9   25.41    2.92
  -2  -1  -9   19.38    2.84
   2   1   9   30.03   10.84
  -2   1  -9   21.48    3.78
  -2  -1 -10  310.58   31.26
  -2   1 -10  302.99   31.39
   2   1  10  276.67   34.32
  -2   1 -10  323.40   31.27
  -2   1 -11  466.27   48.01
   2   1  11  414.27   50.61
  -2   1 -11  489.78   47.89
  -2  -1 -11  484.62   47.88
  -2   1 -12  105.92   12.04
   2   1  12   76.27   18.61
  -2   1 -12  114.44   11.57
  -2  -1 -12  114.34   11.53
  -2  -1 -13   16.19    2.74
  -2   1 -13   14.49    2.71
   2   1  13   13.81   15.80
  -2   1 -13   13.80    4.68
   2   1  14  135.20   24.38
  -2  -1 -14  140.34   14.30
  -2   1 -14  128.06   14.94
  -2   1 -14  142.60   14.30
  -2   1 -15   12.40    2.94
  -2  -1 -15   11.68    3.08
   2   1  15   11.39   20.16
  -2  -1 -16    0.42    2.94
  -2   1 -16   -0.08    2.80
  -2  -1 -17   -1.81    3.10
  -2   1 -17    5.37    3.00
  -2  -1 -18    0.19    3.24
  -2   1 -18   -4.16    3.16
  -2  -1 -19    5.16    3.36
  -2   1 -19    1.87    3.33
  -2   1 -20   54.22    6.38
  -2  -1 -20   42.02    6.27
  -2   1 -21   -2.29    4.00
  -2  -1 -21   -0.11    3.75
  -2   1 -22   -1.40    4.27
  -2  -1 -22   -1.24    4.20
  -2   1 -23    5.34    4.41
  -2  -1 -23    4.97    4.59
  -2  -1 -24   17.55    5.80
  -2   1 -24    7.61    4.74
   2   2 -24    6.71    9.25
   2   2 -24   27.15    5.12
   2   2 -23   -5.70    8.47
   2   2 -23    3.74    3.98
   2   2 -22   -1.43    3.88
   2   2 -22   -7.43    8.09
   2   2 -21   -0.31    3.57
   2   2 -21    0.35    7.65
   2   2 -20   42.41    8.83
   2   2 -20   49.94    6.13
   2  -2 -19   51.08    6.41
   2   2 -19   57.86    6.42
   2   2 -19   46.31    8.83
   2   2 -18   61.56    6.84
   2  -2 -18   61.41    6.88
   2   2 -18   43.64    8.92
   2   2 -17   46.75    5.82
   2  -2 -17   51.28    5.83
   2   2 -17   45.67    8.17
   2   2 -16  201.28   23.99
   2   2 -16  238.20   23.30
   2  -2 -16  233.37   23.29
   2  -2 -15   49.92    5.72
   2   2 -15   46.90    7.67
   2  -2 -15   42.50    8.51
   2   2 -15   53.36    5.75
   2  -2 -14   -2.57    5.98
   2   2 -14    1.28    2.09
   2   2 -14   -0.36    5.00
   2  -2 -14    0.71    2.14
   2   2 -13   -0.05    1.92
   2  -2 -13   -0.97    1.94
   2   2 -12   42.87    4.80
   2  -2 -12   39.67    6.85
   2  -2 -12   43.91    4.78
   2  -2 -11  182.69   18.89
   2   2 -11  194.93   18.90
   2  -2 -11  182.19   19.57
   2  -2 -10   70.57    7.62
   2  -2 -10   70.20    9.01
   2   2 -10   77.99    7.64
   2   2  -9  163.95   16.20
   2  -2  -9  148.00   16.93
   2   2  -8   11.39    1.71
   2  -2  -8    5.67    4.25
  -2  -2   7  102.61   10.22
   2   2  -7   99.96   10.22
   2   2  -6  215.37   21.25
  -2   2   6  217.90   21.26
  -2  -2   6  206.27   21.25
  -2  -2   5  173.10   17.23
   2  -2  -5  148.17   17.66
  -2   2   5  179.44   17.27
   2   2  -5  169.31   17.23
  -2   2   5  189.15   17.74
  -2   2   4  845.54   78.88
  -2   2   4  757.81   80.06
   2   2  -4  786.75   78.61
   2  -2  -4  771.21   78.83
   2   2  -3  609.86   62.03
   2   2  -3  546.16   63.06
  -2   2   3  724.82   63.53
  -2   2   3  692.88   62.28
   2  -2  -3  637.57   62.25
  -2   2   2  164.69   18.07
   2   2  -2  175.41   19.04
   2  -2  -2  176.20   17.54
   2   2  -1   16.60    1.97
  -2   2   1   14.60    3.48
   2   2  -1   13.20    4.36
   2  -2  -1   17.44    2.29
   2   2   0  694.78   69.18
   2   2   0  660.79   69.28
  -2   2   0  715.41   69.16
  -2   2  -1    1.78    1.86
   2   2   1   -2.03    3.20
   2  -2   1    0.34    1.65
   2   2   1    1.78    2.17
  -2   2  -2  678.25   63.96
   2   2   2  646.51   64.06
   2  -2   2  618.85   63.95
  -2   2  -2  614.92   63.95
   2  -2   2  625.91   63.98
  -2   2  -2  634.72   64.05
   2   2   2  670.70   63.93
   2   2   2  667.18   64.16
   2   2   3  157.54   16.53
   2   2   3  158.70   16.20
  -2   2  -3  168.93   16.23
   2  -2   3  160.43   16.24
   2   2   3  160.35   16.68
  -2  -2  -3  166.33   16.74
  -2   2  -4  160.64   17.57
  -2  -2  -4  173.01   17.85
   2   2   4  172.80   17.44
  -2   2  -4  179.88   17.46
   2  -2   4  178.34   17.47
  -2  -2  -4  174.45   17.45
   2   2   4  179.08   17.85
  -2  -2  -5   27.14    2.95
  -2  -2  -5   23.48    4.02
  -2   2  -5   26.85    3.00
   2   2   5   29.82    7.25
  -2   2  -6  142.57   14.19
  -2  -2  -6  139.86   14.16
   2   2   6  126.77   16.67
  -2  -2  -6  142.89   14.62
  -2  -2  -7  539.70   54.09
  -2   2  -7  564.71   54.10
   2   2   7  440.08   55.43
  -2  -2  -7  511.47   54.30
   2   2   7  562.49   54.29
  -2  -2  -8   24.01    3.05
  -2   2  -8   27.15    3.13
   2   2   8   22.88   10.47
  -2   2  -9    4.04    2.63
  -2   2  -9    2.21    1.72
   2   2   9    4.44   10.50
  -2  -2  -9   -0.13    1.65
  -2   2 -10  383.49   39.92
  -2   2 -10  415.83   39.87
  -2  -2 -10  400.40   39.85
   2   2  10  335.15   42.59
  -2  -2 -11    3.17    1.81
  -2   2 -11    0.51    1.95
  -2   2 -11    3.14    3.04
  -2   2 -12   33.92    4.07
  -2  -2 -12   32.75    4.03
   2   2  12   36.25   15.37
  -2   2 -12   31.82    4.98
  -2  -2 -13    3.87    2.24
   2   2  13    3.49   17.96
  -2   2 -13    5.69    3.91
  -2   2 -13    2.46    2.27
  -2   2 -14   83.93    8.74
  -2  -2 -14   80.67    8.69
  -2   2 -14   78.99    9.50
   2   2  14   62.51   19.76
  -2  -2 -15   -0.70    2.69
  -2   2 -15    2.47    4.93
  -2   2 -15    7.14    2.77
  -2   2 -16  288.70   33.12
  -2  -2 -16  321.97   32.77
  -2   2 -16  352.13   32.81
  -2   2 -17   56.41    8.59
  -2  -2 -17   66.65    7.01
  -2   2 -17   56.09    7.02
  -2   2 -18   44.15    5.43
  -2  -2 -18   37.97    5.36
  -2  -2 -19    9.50    3.52
  -2   2 -19    6.95    3.49
  -2  -2 -20    8.17    3.90
  -2   2 -20    3.89    3.71
  -2   2 -21   14.83    4.14
  -2  -2 -21    8.69    4.84
  -2   2 -22   20.81    4.79
  -2  -2 -22   23.79    5.10
  -2  -2 -23   39.24    5.89
  -2   2 -23   25.59    5.69
  -2  -2 -24   21.96    5.23
  -2   2 -24   16.80    5.31
   2   3 -24    3.65    4.46
   2   3 -23   12.40    4.26
   2   3 -23   15.36    8.56
   2   3 -22   29.68    8.84
   2   3 -22   39.87    5.68
   2   3 -21   27.49    4.59
   2   3 -21   18.99    8.23
   2   3 -20   49.04    9.81
   2   3 -20   72.26    7.77
   2   3 -19    7.03    6.76
   2   3 -19    4.22    3.10
   2   3 -18   99.66   13.83
   2   3 -18  125.56   12.53
   2   3 -17   -1.27    6.13
   2   3 -17    0.76    2.70
   2   3 -16    0.22    2.61
   2   3 -16   -3.51    6.06
   2   3 -15    1.35    2.41
   2   3 -14  281.58   28.29
   2   3 -13    2.36    2.04
   2   3 -12    1.77    1.87
   2   3 -11  275.56   27.58
   2   3 -10    1.03    1.62
   2   3  -9   14.09    2.15
   2   3  -8   93.30    9.47
   2   3  -7   60.64    6.23
  -2  -3   6  427.55   43.52
   2   3  -6  447.64   43.53
   2   3  -5   26.14    2.86
  -2  -3   5   18.67   11.26
  -2   3   5   11.49   11.03
  -2  -3   5   26.25    2.86
  -2   3   4  238.37   27.50
  -2   3   4  283.73   25.37
  -2  -3   4  244.75   27.44
   2   3  -4  244.37   24.87
  -2   3   3  191.62   23.26
  -2   3   3  226.20   21.74
  -2  -3   3  182.48   23.52
   2  -3  -2  864.87   83.40
  -2   3   2  750.77   82.83
  -2  -3   2  766.58   82.81
   2   3  -2  921.25   83.55
  -2  -3   2  855.02   82.51
  -2   3   1  405.19   40.61
   2   3  -1  354.25   40.71
   2   3  -1  355.28   40.86
   2  -3  -1  433.12   40.48
   2   3  -1  430.59   40.41
  -2  -3   1  375.42   40.56
   2   3   0  552.09   54.51
  -2  -3   0  579.22   54.84
  -2  -3   0  537.43   54.43
   2  -3   0  541.03   54.48
  -2   3   0  590.51   54.46
   2  -3   0  510.83   54.38
   2   3   0  576.65   54.72
  -2   3  -1  378.89   37.41
   2  -3   1  350.69   37.46
  -2  -3  -1  380.76   37.41
   2   3   1  355.58   37.44
   2   3   1  369.61   37.71
  -2   3  -1  412.66   37.48
  -2   3  -2   15.26    2.08
   2   3   2   14.52    3.01
   2   3   2   16.25    4.74
   2  -3   2   13.98    3.56
  -2   3  -2   15.04    2.79
   2  -3   2   19.29    3.13
   2   3   3  379.63   37.34
   2   3   3  393.97   37.18
   2  -3   3  336.33   37.18
   2   3   3  384.34   37.55
  -2   3  -3  373.11   37.19
   2  -3   3  363.52   37.38
   2  -3   3  413.20   37.38
   2   3   4 1051.56  102.25
  -2  -3  -4 1019.89  102.27
  -2   3  -4 1032.65  102.11
   2   3   4 1025.27  102.03
  -2   3  -4 1017.47  102.05
   2  -3   5  108.69   14.03
  -2  -3  -5  127.18   12.77
  -2   3  -5  121.32   12.12
  -2   3  -5  118.01   12.51
   2   3   5  108.09   14.11
  -2  -3  -6   16.85    4.30
   2  -3   6   18.69    7.67
  -2   3  -6   21.98    2.56
   2   3   6   15.63    8.50
  -2  -3  -6   20.92    2.50
   2  -3   7  147.53   19.06
  -2  -3  -7  160.10   16.57
  -2   3  -7  175.44   16.59
  -2  -3  -7  154.14   17.16
   2   3   7  150.05   19.31
  -2   3  -8   15.79    2.33
   2   3   8   18.58   10.38
  -2  -3  -8   11.05    4.72
  -2  -3  -8   14.55    2.35
   2  -3   8    9.91    9.43
  -2   3  -9   -0.39    1.70
   2   3   9   -8.20   11.79
   2  -3   9   -1.30   10.70
  -2  -3  -9    0.70    1.94
  -2  -3  -9    1.89    4.40
  -2   3 -10  630.69   63.93
   2  -3  10  472.94   65.52
  -2  -3 -10  691.47   63.96
   2   3  10  530.26   65.90
   2  -3  11  260.22   37.65
  -2  -3 -11  341.04   34.50
  -2   3 -11  357.59   34.52
   2   3  11  314.04   38.53
  -2   3 -12  130.64   13.14
   2   3  12  119.67   20.55
  -2   3 -12  115.26   13.34
  -2  -3 -12  136.69   13.16
   2  -3  12   94.29   19.57
  -2  -3 -13   81.70    8.22
   2   3  13   82.35   19.03
   2  -3  13   57.61   18.51
  -2   3 -13   74.88    8.18
  -2   3 -13   71.72    8.72
  -2  -3 -14   93.10    9.33
   2   3  14   59.83   19.90
   2  -3  14   43.35   18.41
  -2   3 -14   88.53    9.28
  -2   3 -14   78.19    9.79
  -2  -3 -15   22.18    3.86
  -2   3 -15   18.07    5.29
  -2   3 -15   25.64    3.73
  -2   3 -16   -4.10    5.33
  -2   3 -16    3.07    2.85
  -2  -3 -16    3.80    3.43
  -2  -3 -17   -2.02    3.32
  -2   3 -17   -5.04    5.56
  -2   3 -17    1.62    3.01
  -2   3 -18   10.60    5.94
  -2  -3 -18   13.85    3.82
  -2   3 -18   12.64    3.60
  -2   3 -19    3.05    6.26
  -2   3 -19    5.55    3.47
  -2  -3 -19    2.99    3.48
  -2   3 -20   79.62    9.46
  -2  -3 -20   88.83    9.54
  -2   3 -21    7.84    3.89
  -2  -3 -21    1.72    8.65
  -2  -3 -21    4.99    3.96
  -2  -3 -22    5.24    9.32
  -2   3 -22    5.86    4.25
  -2  -3 -22    1.52    4.15
  -2   3 -23   -0.40    4.46
  -2   3 -24   11.88    4.90
   2   4 -24    7.27    4.63
   2   4 -23   22.05    4.78
   2   4 -23   13.20    8.55
   2   4 -22   49.69    6.52
   2   4 -22   45.84    9.64
   2   4 -21   -0.17    7.37
   2   4 -21    1.36    3.58
   2   4 -20   31.51    4.89
   2   4 -20   34.38    7.95
   2   4 -19    2.72    3.18
   2   4 -19   12.69    6.81
   2   4 -18    1.13    3.11
   2   4 -18   -7.73    6.37
   2   4 -17  150.27   15.54
   2   4 -16  367.70   36.90
   2   4 -15   17.81    3.22
   2   4 -14  102.01   10.60
   2   4 -13   20.21    3.09
   2   4 -12   84.54    8.83
   2   4 -11   51.81    5.59
   2   4 -10  368.54   36.80
   2   4  -9  340.17   33.96
   2   4  -8   93.07    9.51
   2   4  -7   85.38    8.72
   2   4  -6   24.55    2.84
  -2  -4   5  300.26   33.02
   2   4  -5  309.02   30.66
  -2   4   5  282.50   33.23
   2   4  -4   12.09    1.74
  -2   4   4    8.97   10.37
  -2  -4   4   24.84   10.58
  -2  -4   3  121.31   13.68
  -2  -4   3  115.34   11.70
  -2   4   3  117.24   13.49
  -2  -4   2    6.06    4.20
  -2  -4   2    7.06    2.07
  -2   4   2    4.67    4.62
   2   4  -2    2.61    7.86
  -2  -4   1   30.58    4.81
   2   4  -1   45.60    4.28
  -2   4   1   31.91    4.94
  -2  -4   1   42.29    4.71
   2   4  -1   31.62    5.91
  -2  -4   1   34.02    7.24
   2  -4  -1   37.54    4.81
   2   4  -1   34.03    6.64
   2  -4  -1   30.68    5.25
  -2   4   0   88.30    9.22
   2   4   0   89.32    9.22
  -2  -4   0   89.82    9.21
  -2  -4   0   85.41   11.18
   2   4   0   89.22    9.55
   2   4   0   77.94   10.35
   2  -4   0  102.39    9.36
   2  -4   0   85.54    9.55
   2  -4   0   82.25    9.20
  -2  -4  -1   -0.49    1.94
   2  -4   1    2.64    3.45
  -2   4  -1   -0.26    3.83
   2   4   1    0.54    2.51
  -2  -4  -1   -0.73    4.88
  -2   4  -1   -0.16    1.98
   2   4   1   -2.18    5.39
   2   4   2  100.87   10.76
  -2   4  -2  121.46   11.16
   2  -4   2   97.62   11.16
   2   4   2   97.41   11.63
   2  -4   3   33.37    3.48
   2   4   3   19.83    3.61
   2  -4   3   26.05    4.33
  -2   4  -3   24.23    2.92
   2   4   3   21.71    5.45
  -2   4  -4   60.31    6.13
  -2  -4  -4   50.44    7.32
   2  -4   5   47.02    8.25
  -2  -4  -5   40.24    6.56
  -2   4  -5   48.47    5.02
   2   4   5   40.73    8.84
  -2   4  -6   15.30    2.32
   2  -4   6    6.37    6.96
  -2  -4  -6    6.83    4.93
   2   4   6   13.86    7.79
   2   4   7  183.53   22.92
  -2  -4  -7  208.20   21.26
  -2   4  -7  176.06   21.02
  -2   4  -7  220.02   20.61
   2  -4   7  181.22   22.50
  -2  -4  -8    7.18    5.35
   2   4   8    7.90    9.78
  -2   4  -8    8.61    1.97
   2  -4   8   -4.24    9.33
  -2   4  -9  447.91   42.48
  -2  -4  -9  397.47   42.94
   2   4   9  386.60   44.67
   2  -4   9  352.06   44.25
   2  -4  10  343.98   45.72
  -2  -4 -10  416.85   44.01
  -2   4 -10  455.37   43.60
   2   4  10  428.36   46.55
   2  -4  11   -1.66   12.74
   2   4  11    2.96   14.10
  -2   4 -11    1.15    1.96
  -2  -4 -11    1.70    5.63
  -2  -4 -12   42.65    7.85
  -2   4 -12   47.39    5.23
   2   4  12   29.34   16.22
   2  -4  12   29.31   14.59
  -2  -4 -12   45.74    5.19
   2   4  13   37.26   18.40
  -2  -4 -13   58.76    6.28
  -2   4 -13   55.72    6.32
  -2  -4 -13   47.71    9.00
   2  -4  13   65.14   16.89
  -2  -4 -14   26.95    7.52
   2   4  14    6.98   18.77
  -2  -4 -14   27.29    3.58
  -2   4 -14   19.93    3.59
   2  -4  14   13.00   17.60
  -2   4 -14   25.53    4.88
  -2  -4 -15    0.08    2.68
  -2   4 -15    1.14    2.74
  -2   4 -15    3.75    4.49
  -2  -4 -15   11.76    7.54
  -2  -4 -16   72.38   11.66
  -2   4 -16   78.12   10.00
  -2   4 -16   89.91    9.21
  -2   4 -17   18.95    3.84
  -2   4 -17   21.22    5.60
  -2  -4 -17   17.44    8.13
  -2   4 -18    5.76    3.32
  -2  -4 -18    7.66    7.91
  -2   4 -18    4.00    5.56
  -2   4 -19    1.11    3.58
  -2   4 -19    4.03    6.01
  -2  -4 -19    5.03    8.38
  -2   4 -20   27.75    4.86
  -2  -4 -20   22.36    9.41
  -2   4 -21    5.13    3.89
  -2  -4 -21  -12.55    9.32
  -2   4 -22   52.54    6.83
  -2  -4 -22   37.58   11.05
  -2   4 -23   67.59    8.36
  -2   4 -24   18.96    5.24
   2   5 -24   12.24    4.63
   2   5 -23   25.66    4.90
   2   5 -23   23.25    8.68
   2   5 -22    7.81    3.83
   2   5 -22   19.35    8.06
   2   5 -21   25.91    8.68
   2   5 -21   47.11    5.80
   2   5 -20    5.72    7.23
   2   5 -20   15.23    3.86
   2   5 -19   17.19    7.15
   2   5 -19   26.48    4.40
   2   5 -18   13.03    3.27
   2   5 -17   22.53    3.83
   2   5 -16    6.61    2.98
   2   5 -15   15.74    3.17
   2   5 -14   72.94    7.91
   2   5 -13   44.35    5.16
   2   5 -12    3.43    2.03
   2   5 -11   67.69    7.20
   2   5 -10    4.80    1.84
   2   5  -9   42.28    4.68
   2   5  -8  345.87   34.53
   2   5  -7  166.31   16.74
   2   5  -6    1.61    1.49
  -2  -5   6    4.89   11.43
   2   5  -5   32.71    3.69
  -2   5   5   24.22   11.29
  -2  -5   5   28.88   10.74
  -2   5   4  264.97   29.09
  -2  -5   4  266.33   28.99
  -2   5   3    9.86    5.64
   2  -5  -3   14.43    4.10
  -2  -5   3    9.32    2.04
  -2  -5   3    4.17    5.20
   2  -5  -2   75.16   10.05
  -2  -5   2   87.34    8.28
  -2  -5   2   75.22    8.79
   2  -5  -2   73.05    8.88
  -2   5   2   78.37    8.80
   2   5  -2   58.25    9.89
   2   5  -1  953.85  110.70
  -2   5   1 1148.70  110.59
  -2  -5   1 1127.39  111.13
   2  -5  -1  973.08  110.71
  -2  -5   1 1336.57  110.72
   2  -5  -1 1086.26  110.74
   2   5  -1 1261.99  110.61
  -2  -5   1 1016.18  110.56
   2  -5   0   -0.27    3.11
   2  -5   0   -2.85    3.78
   2   5   0    1.65    1.98
  -2  -5   0    6.72    6.17
  -2   5   0    2.98    4.28
   2   5   0   -0.13    2.97
  -2   5   0   -0.62    1.90
  -2  -5   0   -0.06    1.83
   2  -5   1  623.69   65.66
   2   5   1  636.76   65.67
  -2  -5  -1  682.67   65.63
   2  -5   1  647.40   65.87
  -2   5  -1  661.80   65.63
  -2   5  -1  747.31   65.93
  -2  -5  -1  653.82   66.12
   2  -5   2    2.42    4.21
   2  -5   2    9.71    2.29
  -2   5  -2    7.49    4.13
   2   5   2    0.91    2.29
   2   5   3 1102.09  111.46
  -2   5  -3 1106.37  111.43
  -2   5  -3 1207.06  111.63
   2  -5   3 1098.71  111.64
   2  -5   4   25.71    3.01
  -2   5  -4   14.97    2.41
   2   5   4   17.05    3.26
   2  -5   4   13.05    5.11
   2  -5   4    8.65    5.41
   2   5   4   14.26    5.90
  -2  -5  -5    1.40    5.04
   2  -5   5    1.56    6.12
   2   5   5    3.62    7.16
  -2   5  -5    3.91    1.70
   2  -5   6    0.98    6.99
   2   5   6    5.85    8.09
  -2  -5  -6   -4.06    5.36
  -2   5  -6    3.05    1.77
   2   5   7    4.06    9.15
  -2   5  -7   -0.05    1.74
   2  -5   7   -2.48    8.11
  -2  -5  -7    1.38    5.55
  -2  -5  -8  169.90   18.99
   2   5   8  157.77   21.01
   2  -5   8  145.63   20.58
  -2   5  -8  184.51   17.97
  -2   5  -9    1.31    1.81
   2   5   9   12.04   11.79
  -2  -5  -9    1.60    5.44
   2  -5   9    2.36   10.23
  -2  -5 -10   75.11   10.30
   2   5  10   74.63   16.14
   2  -5  10   61.77   14.82
  -2   5 -10   89.18    8.91
  -2  -5 -11    3.49    5.87
   2  -5  11    5.18   12.26
  -2   5 -11    0.51    2.06
   2   5  11   -3.27   14.27
   2   5  12   41.49   16.77
   2  -5  12   44.67   15.33
  -2   5 -12   61.71    6.63
  -2  -5 -12   57.38    8.99
  -2  -5 -13   55.98    9.16
  -2   5 -13   58.70    6.40
   2   5  13   28.97   18.07
   2  -5  13   31.47   16.86
  -2  -5 -14   16.48    7.66
  -2   5 -14   15.17    3.20
  -2  -5 -15    2.60    7.64
  -2   5 -15    0.25    2.81
  -2  -5 -16   -4.45    7.56
  -2   5 -16    4.05    4.78
  -2   5 -16    4.04    3.10
  -2   5 -17    4.78    5.03
  -2   5 -17    7.98    3.28
  -2   5 -18  253.74   23.85
  -2   5 -18  216.33   24.18
  -2  -5 -18  203.89   25.30
  -2  -5 -19   85.77   14.04
  -2   5 -19  109.20   11.39
  -2  -5 -20   43.09   10.66
  -2   5 -20   62.19    7.34
  -2  -5 -21  -12.95    9.91
  -2   5 -21    2.02    4.01
  -2  -5 -22    0.66    9.93
  -2   5 -22   -3.65    4.23
  -2   5 -23   34.72    5.93
   2   6 -23   15.10    4.79
   2   6 -22   55.61   10.55
   2   6 -22   69.65    8.08
   2   6 -21   26.23    4.52
   2   6 -21   10.25    7.90
   2   6 -20   29.96    8.03
   2   6 -20   31.89    5.00
   2   6 -19    0.80    3.43
   2   6 -18   -0.74    3.03
   2   6 -17  208.46   21.24
   2   6 -16   16.63    3.40
   2   6 -15    0.69    2.71
   2   6 -14   18.81    3.26
   2   6 -13    1.76    2.46
   2   6 -12   73.39    7.82
   2   6 -11   46.37    5.24
   2   6 -10   26.55    3.34
   2   6  -9   23.32    3.08
   2   6  -8   47.82    5.22
  -2  -6   7  163.12   21.83
  -2   6   7  143.66   22.00
   2   6  -7  172.30   17.21
  -2  -6   6   16.94   12.23
   2   6  -6   -0.87    1.75
  -2   6   6   11.52   10.38
   2  -6  -5    5.38    4.73
  -2  -6   5    1.13   11.63
  -2   6   5   -1.71   10.58
   2   6  -5    5.22    1.76
   2  -6  -4  356.70   35.25
  -2  -6   4  331.81   35.85
  -2   6   4  347.57   35.87
  -2  -6   3   54.13    7.65
  -2   6   3   59.18    7.82
   2  -6  -3   67.30    7.71
  -2  -6   2   24.59    4.28
  -2   6   2   24.84    4.27
   2  -6  -2   29.71    5.28
  -2  -6   1   12.74    7.18
   2   6  -1    7.70    5.13
   2  -6  -1    7.51    6.35
  -2  -6   1    5.76    2.17
   2  -6  -1    4.79    4.28
   2   6  -1    8.53    2.40
  -2   6   1    6.79    2.37
   2   6   0   36.98    4.18
   2   6   0   31.99    4.70
  -2  -6   0   44.55    7.59
   2  -6   0   27.61    5.76
   2  -6   0   32.30    4.74
  -2   6   0   31.90    3.91
  -2  -6   0   36.08    3.89
   2  -6   1   89.17   10.03
   2  -6   1  104.01   10.90
  -2   6  -1  101.88    9.84
   2   6   1   89.28   10.06
  -2  -6  -1   86.64   11.60
   2   6   1  100.66   10.03
   2  -6   2  238.63   22.88
  -2  -6  -2  217.46   23.73
   2   6   2  218.36   22.85
   2  -6   2  231.43   23.42
   2   6   3   20.66    3.37
   2  -6   3   18.31    4.93
   2  -6   3   27.30    3.49
   2  -6   4   80.22   10.89
   2   6   4   84.13   11.15
  -2   6  -4   95.68    9.55
   2  -6   4   95.09   11.36
  -2   6  -4   91.95   10.79
   2   6   4   92.17    9.72
   2   6   5    7.59    7.12
   2  -6   5    3.95    6.18
  -2   6  -5    6.17    2.03
  -2   6  -5    9.54    5.22
  -2  -6  -5    5.90    6.08
   2  -6   5    8.56    2.74
  -2  -6  -6  134.01   15.97
  -2   6  -6  154.53   14.73
   2   6   6  118.54   16.69
   2  -6   6  119.58   16.57
   2  -6   7   27.21    7.98
  -2  -6  -7   17.17    6.56
   2   6   7   24.20    9.62
  -2   6  -7   24.39    3.21
  -2  -6  -8   84.41   10.56
   2  -6   8   61.06   13.12
   2   6   8   57.87   13.21
  -2   6  -8   88.57    8.86
  -2  -6  -9  266.66   28.16
  -2   6  -9  286.72   27.31
   2   6   9  210.29   30.08
   2  -6   9  214.11   29.45
   2   6  10   11.95   12.99
   2  -6  10   -3.16   11.46
  -2  -6 -10    1.60    6.33
  -2   6 -10    4.93    2.19
   2   6  11  -11.29   13.99
  -2   6 -11    1.54    2.08
  -2  -6 -11   -3.78    6.97
   2  -6  11    6.28   12.55
  -2   6 -12  122.78   12.47
   2   6  12   86.94   20.13
   2  -6  12   89.89   18.72
  -2  -6 -12  125.01   14.22
  -2   6 -13   28.75    4.00
  -2  -6 -13   23.81    8.50
  -2   6 -14   19.90    3.59
  -2  -6 -14   25.83    8.58
  -2  -6 -15    9.98    8.83
  -2   6 -15   23.07    3.91
  -2  -6 -16    3.16    8.09
  -2   6 -16    2.95    3.13
  -2  -6 -17  227.45   26.74
  -2   6 -17  239.80   25.71
  -2   6 -17  264.16   25.44
  -2  -6 -18   -4.64    9.00
  -2   6 -18   17.48    3.73
  -2   6 -18    8.93    5.45
  -2   6 -19   22.35    4.47
  -2  -6 -19   20.16   10.07
  -2   6 -20   -0.36    3.88
  -2  -6 -20   12.68    9.90
  -2   6 -21    0.77    4.02
  -2  -6 -21    1.14   10.20
  -2   6 -22    3.01    4.29
  -2  -6 -22    9.22   10.51
  -2  -6 -23   -2.95   10.94
  -2   6 -23   12.86    4.87
   2  -7 -23   27.45   11.87
  -2   7  23   61.44   41.13
   2   7 -23   43.38    6.24
  -2  -7  23   39.37   38.47
   2   7 -22    5.00    8.30
   2   7 -22   17.89    4.62
   2   7 -21   50.55   10.32
   2   7 -21   67.82    7.78
   2   7 -20    2.08    3.75
   2   7 -19   37.32    5.41
   2   7 -18    5.00    3.37
   2   7 -17    1.70    3.01
   2   7 -16    9.95    3.30
   2   7 -15  196.59   20.05
   2   7 -14    0.89    2.67
   2   7 -13  318.02   31.95
   2   7 -12   -0.19    2.27
   2   7 -11   -1.46    2.16
   2   7 -10   64.51    6.97
   2   7  -9    3.32    1.97
  -2  -7   8   96.07   18.41
   2   7  -8  127.58   12.72
  -2   7   8   90.86   18.07
   2  -7  -7  148.61   17.99
  -2  -7   7  161.10   21.05
  -2   7   7  130.68   20.50
   2   7  -7  175.72   16.98
   2   7  -6    8.07    2.14
   2  -7  -6   14.86    5.32
  -2  -7   6   18.04   11.92
   2  -7  -5   60.30    8.19
  -2  -7   5   55.78   11.74
  -2   7   5   56.88   11.81
  -2   7   4   68.49   10.97
   2  -7  -4  100.90   10.56
  -2  -7   4   90.13   11.02
  -2   7   3   61.48    7.71
  -2  -7   3   61.43    7.70
   2  -7  -3   66.71    8.41
  -2  -7   2   14.88    3.16
  -2  -7   2   23.19    9.22
   2  -7  -2   25.69    5.64
  -2   7   2   12.75    3.31
   2  -7  -1  302.53   32.07
  -2  -7   1  314.65   31.38
   2   7  -1  226.68   31.70
   2  -7  -1  265.10   31.84
   2   7  -1  350.74   31.60
  -2   7   1  367.65   31.64
  -2   7   1  324.73   31.40
  -2  -7   1  311.09   32.99
   2   7   0    4.35    2.59
  -2  -7   0    3.17    1.62
   2   7   0    6.73    3.27
  -2  -7   0    1.46    7.29
   2  -7   0    2.63    3.59
   2  -7   0    7.53    5.41
  -2   7   0    3.56    1.77
   2   7   1   31.75    4.28
   2  -7   1   32.12    4.37
  -2  -7  -1   42.40    7.92
   2   7   1   31.06    4.30
   2  -7   1   46.93    6.54
   2  -7   2 1531.43  147.60
   2   7   2 1534.00  147.60
   2  -7   2 1587.31  148.00
  -2  -7  -2 1578.52  148.19
   2   7   2 1273.16  147.67
   2  -7   3  711.76   81.74
   2   7   3  801.85   81.51
   2  -7   3  921.03   81.55
   2  -7   3  876.96   82.03
   2   7   3  736.62   81.81
   2   7   4   44.11    7.78
   2  -7   4   55.76    5.86
   2   7   4   37.78    5.74
   2  -7   4   53.09    9.11
  -2   7  -4   56.85    5.55
   2  -7   4   36.13    7.41
   2  -7   5   15.77    7.56
   2   7   5    9.35    3.23
   2  -7   5    8.89    5.89
  -2   7  -5   13.40    2.61
   2   7   5   11.81    6.56
   2  -7   6    4.83    7.03
  -2  -7  -6    2.56    6.65
   2   7   6   -0.72    7.79
  -2   7  -6   -0.86    2.15
  -2  -7  -7   75.15   10.03
   2   7   7   51.45   11.74
   2  -7   7   59.82   11.70
  -2   7  -7   76.41    7.83
   2   7   8  161.26   21.82
  -2  -7  -8  175.78   20.13
  -2   7  -8  196.73   18.96
   2  -7   8  153.03   21.65
   2   7   9  105.64   16.50
   2  -7   9   68.83   15.10
  -2   7  -9  111.61   10.94
  -2  -7  -9   88.73   12.76
  -2   7 -10    2.49    2.31
  -2  -7 -10    4.45    7.20
   2  -7  10   -5.82   11.52
  -2   7 -11   13.31    2.78
  -2  -7 -11   11.61    8.03
   2  -7  11   11.82   12.15
   2   7  11   -7.41   13.51
  -2  -7 -12   -8.60    7.81
  -2   7 -12   -1.30    2.59
  -2  -7 -13   44.42   10.28
  -2   7 -13   54.23    6.21
  -2   7 -14   35.11    4.68
  -2  -7 -14   16.32    9.46
  -2  -7 -15   46.78   10.09
  -2   7 -15   45.16    5.71
  -2  -7 -16   -6.28    8.81
  -2   7 -16    5.29    3.26
  -2  -7 -17   -5.47    9.31
  -2   7 -17    1.26    3.41
  -2  -7 -18   12.43    9.87
  -2   7 -18   17.79    4.09
  -2   7 -19   97.63   10.46
  -2  -7 -19   76.28   13.78
  -2  -7 -20    5.16   10.39
  -2   7 -20    5.24    4.06
  -2   7 -21   15.56    4.41
  -2  -7 -21    3.40   10.62
  -2  -7 -22  -10.58   11.15
  -2   7 -22   -6.25    4.57
  -2  -7 -23   19.09   12.30
  -2   7 -23   29.20    5.75
   2  -8 -23   30.94   11.53
   2   8 -22   21.56    4.97
   2  -8 -22   18.23   11.37
  -2  -8  22   -2.52   34.65
  -2   8  22   21.72   36.53
  -2   8  21   -8.63   35.56
  -2  -8  21  -19.35   33.65
   2   8 -21   18.46    4.57
   2  -8 -21   13.37   10.68
   2  -8 -20   11.43   10.26
   2   8 -20    1.58    3.86
   2  -8 -19   -2.40    9.78
   2   8 -19    6.05    3.70
   2   8 -18   13.30    3.80
   2  -8 -18    9.02    9.26
   2  -8 -17   45.74   11.48
   2   8 -17   66.73    7.47
   2   8 -16    3.74    3.05
   2  -8 -16   -3.87    8.47
   2  -8 -15   26.34    8.69
   2   8 -15   26.43    4.15
   2  -8 -14  153.15   20.13
   2   8 -14  184.68   18.32
   2  -8 -13   22.92    8.75
   2   8 -13   36.53    4.64
   2   8 -12   57.90    6.43
   2  -8 -12   47.79   10.05
   2  -8 -11    7.88    7.55
   2   8 -11   14.44    2.92
  -2  -8  10   -6.04   17.20
  -2   8  10    4.08   15.92
   2   8 -10   -0.46    2.31
  -2   8   9    3.23   13.73
  -2  -8   9   14.89   15.09
   2   8  -9    4.50    2.34
   2   8  -8   94.36    9.30
  -2  -8   8   77.29   16.20
  -2   8   8   72.12   14.79
   2  -8  -8   67.93   11.01
   2   8  -7  100.33    9.84
  -2   8   7   50.57   15.01
  -2  -8   7   82.27   16.00
   2  -8  -7   81.54   11.56
  -2   8   6   50.78    7.03
   2   8  -6   75.30    6.91
  -2  -8   6   56.00   13.58
   2  -8  -6   55.78    8.78
  -2   8   6   62.47   13.21
  -2   8   5    3.43    7.07
  -2  -8   5   -0.42    7.55
   2  -8  -5    0.14    5.70
   2   8  -5    0.48    5.83
   2  -8  -5    0.80    6.34
   2   8  -4   81.59    9.73
  -2  -8   4   75.22    9.64
   2  -8  -4   92.48   10.24
   2  -8  -4   77.68    9.99
  -2   8   4   78.16    9.59
   2  -8  -3   24.50    6.54
  -2  -8   3   27.59    4.78
  -2   8   3   31.92    4.86
  -2  -8   2   19.10    3.15
   2  -8  -2   21.58    5.94
  -2  -8   2   15.96    9.61
  -2   8   2   23.06    3.33
   2  -8  -1  499.29   54.45
  -2   8   1  516.41   53.81
  -2  -8   1  523.61   55.26
  -2  -8   1  553.08   53.79
  -2   8   1  574.67   54.08
   2   8  -1  563.22   54.05
  -2  -8   0  107.33   12.89
   2   8   0   80.09   10.59
   2  -8   0   89.90   11.11
   2   8   0  111.84   10.29
   2  -8   0  101.80   11.89
  -2   8   0   96.01    9.80
   2   8   1  272.29   28.07
   2   8   1  282.87   27.95
  -2  -8  -1  310.72   29.31
   2  -8   1  262.52   27.97
   2  -8   1  327.99   28.93
   2  -8   2  262.30   25.57
   2   8   2  265.65   25.56
   2   8   2  254.40   25.86
   2  -8   2  274.19   26.59
  -2  -8  -2  267.64   26.91
   2   8   2  224.53   25.69
   2  -8   2  247.19   25.78
   2  -8   3    1.84    2.60
   2  -8   3    2.79    4.22
   2   8   3   -1.24    4.53
  -2  -8  -3   -4.91    7.05
   2   8   3   -1.83    2.52
   2  -8   3   -2.66    6.79
   2   8   4  170.75   18.54
  -2   8  -4  198.20   18.61
   2   8   4  160.32   19.39
   2  -8   4  209.30   18.63
   2  -8   4  165.45   20.45
   2  -8   4  148.42   19.20
   2   8   5   76.34    9.25
   2   8   5   64.16   11.19
  -2   8  -5   96.55    9.23
   2  -8   5   97.84   12.51
   2  -8   5   68.31   10.97
   2  -8   5   96.85    9.39
   2  -8   6    4.12    7.28
  -2   8  -6    1.59    2.28
   2   8   6   -6.75    7.79
  -2  -8  -6   -0.34    6.93
  -2   8  -7   99.25    9.48
   2  -8   7   57.75   12.27
  -2  -8  -7   74.92   11.78
   2   8   7   72.35   12.81
   2   8   8    3.96   10.48
   2  -8   8    4.74    9.06
  -2  -8  -8   -2.25    6.85
  -2   8  -8    1.45    2.39
   2  -8   9   37.49   11.59
  -2  -8  -9   34.09    9.14
  -2   8  -9   44.83    5.09
   2   8   9   21.82   11.94
  -2   8 -10    8.21    2.74
  -2  -8 -10    3.98    8.12
  -2   8 -11    9.11    2.86
  -2  -8 -11   12.55    7.98
  -2  -8 -12   27.83    9.05
  -2   8 -12   18.06    3.52
  -2   8 -13  162.30   16.67
  -2  -8 -13  160.06   19.15
  -2   8 -14   31.37    4.53
  -2  -8 -14   31.01    9.53
  -2  -8 -15    5.57    8.81
  -2   8 -15    9.21    3.40
  -2  -8 -16    3.77    9.55
  -2   8 -16    1.75    3.23
  -2   8 -17   77.83    8.86
  -2  -8 -17   80.36   12.75
  -2   8 -18   30.64    5.00
  -2  -8 -18   18.88   10.53
  -2   8 -19   -2.99    3.81
  -2  -8 -19    0.24   10.29
  -2   8 -20   -0.25    4.01
  -2  -8 -20   -0.25   10.78
  -2  -8 -21   -4.45   11.09
  -2   8 -21   -3.24    4.31
  -2   8 -22   18.47    5.01
  -2  -8 -22    7.86   11.48
  -2  -9  22   34.61   33.38
   2  -9 -22   30.87   12.22
   2   9 -22   54.83    7.00
  -2   9  22  -14.32   35.13
  -2   9  21   39.92   33.43
   2   9 -21   41.38    5.86
   2  -9 -21    3.69   11.01
  -2  -9  21   35.25   31.91
   2  -9 -20   -3.87   10.31
  -2   9  20   11.30   30.86
   2   9 -20    3.45    4.03
  -2  -9  20   13.85   29.95
  -2  -9  19   20.77   29.31
   2  -9 -19   11.99   10.06
  -2   9  19  -18.42   28.61
   2   9 -19   10.96    4.03
  -2  -9  18   27.47   28.26
   2  -9 -18   40.74   10.44
   2   9 -18   28.08    4.88
  -2   9  18   51.09   28.60
   2  -9 -17   13.69    9.60
  -2  -9  17   12.31   25.98
   2   9 -17   -1.60    3.42
  -2  -9  16   -1.73   24.84
   2  -9 -16   11.65    9.26
   2   9 -16    5.80    3.27
  -2  -9  15   17.14   22.63
   2  -9 -15   13.92    9.09
   2   9 -15   18.44    3.70
   2  -9 -14   22.87    8.66
  -2  -9  14   -7.90   22.01
  -2   9  14   33.05   20.92
   2   9 -14    6.61    3.08
   2  -9 -13  104.07   16.13
   2   9 -13  140.45   13.80
  -2   9  13   87.36   24.19
  -2  -9  13  121.07   25.25
  -2   9  12    8.89   18.02
   2  -9 -12   -3.14    8.56
  -2  -9  12   -4.09   20.17
   2   9 -12   -2.34    2.94
   2  -9 -11   42.89    9.32
  -2   9  11   27.77   17.44
   2   9 -11   46.32    5.50
  -2  -9  11   49.19   18.70
  -2  -9  10   40.68   16.84
   2   9 -10   56.54    6.42
  -2   9  10   42.28   16.18
  -2   9   9   46.19   14.87
  -2  -9   9   56.30   16.71
   2   9  -9   60.54    6.79
  -2  -9   8   91.75   18.92
   2   9  -8  122.03   11.91
  -2   9   8   78.80   17.53
   2  -9  -8   95.67   13.84
   2   9  -7   60.31    6.03
  -2  -9   7   55.08   14.87
  -2   9   7   29.73   13.75
   2  -9  -7   58.79    8.64
  -2   9   7   40.09    6.20
   2  -9  -6   51.20    9.04
  -2   9   6   48.85   10.18
  -2  -9   6   45.11   10.56
   2   9  -6   63.64    6.63
  -2  -9   5   96.15   12.26
  -2   9   5   86.06   11.99
   2  -9  -5  119.81   12.29
   2  -9  -5  122.04   12.68
   2   9  -5  103.60   11.90
   2  -9  -4   57.61    8.71
   2  -9  -4   58.23    7.74
   2   9  -4   56.13    7.42
  -2   9   4   46.31    6.92
  -2  -9   4   57.00    7.06
  -2  -9   3   51.62    6.31
   2   9  -3   56.52    7.04
  -2   9   3   55.93    6.44
   2  -9  -3   62.53    8.58
   2  -9  -3   60.33    7.34
   2  -9  -2  363.59   35.32
  -2  -9   2  348.16   34.28
   2  -9  -2  296.61   34.50
  -2   9   2  363.12   34.32
   2   9  -2  291.54   34.43
  -2   9   2  414.60   34.66
  -2  -9   2  391.87   36.60
   2  -9  -1  379.72   38.23
  -2  -9   1  397.69   39.27
  -2   9   1  355.56   37.15
  -2   9   1  421.32   37.56
   2   9  -1  416.00   37.53
   2  -9   0  135.02   16.32
   2   9   0  144.20   14.89
  -2  -9   0  160.56   17.39
   2  -9   1   23.87    6.81
   2   9   1   17.68    3.18
   2   9   1   17.41    2.95
  -2  -9  -1   15.72    7.96
   2   9   1   14.42    3.05
   2   9   2  208.90   22.31
   2  -9   2  247.85   23.64
   2   9   2  238.91   22.13
   2   9   2  199.78   22.35
   2  -9   2  218.02   22.13
  -2  -9  -2  247.95   23.89
   2  -9   2  209.80   22.33
   2   9   3  618.94   58.25
   2  -9   3  715.06   59.27
   2  -9   3  649.43   58.25
   2  -9   3  514.29   58.49
   2   9   3  487.27   58.47
   2   9   3  508.76   58.38
  -2  -9  -3  632.24   59.28
   2  -9   4   12.79    3.11
   2  -9   4    9.48    8.74
   2   9   4   11.86    5.57
   2  -9   4    7.08    5.60
   2   9   4   10.00    2.90
   2  -9   5    4.14    9.43
   2  -9   5   -2.47    6.36
   2   9   5    0.81    2.92
  -2   9  -5   -1.13    2.74
   2  -9   5   -0.42    3.06
   2   9   5    7.98    6.12
   2   9   6   59.91   10.69
   2  -9   6   53.63   10.81
  -2   9  -6   82.89    8.24
  -2   9  -7   65.16    6.99
   2  -9   7   48.08   10.46
  -2  -9  -7   71.39   10.41
   2   9   7   47.67   10.59
  -2  -9  -8   88.89   14.20
  -2   9  -8  119.57   11.99
  -2  -9  -9   19.68    8.42
  -2   9  -9   18.31    3.49
  -2  -9 -10   67.22   11.54
  -2   9 -10   73.45    8.04
  -2   9 -11    5.39    2.96
  -2  -9 -11   -1.23    9.31
  -2   9 -12   23.34    3.97
  -2  -9 -12   16.61    9.80
  -2  -9 -13   13.48    9.95
  -2   9 -13   23.22    3.99
  -2   9 -14  118.09   12.21
  -2  -9 -14   96.92   15.27
  -2   9 -15   16.26    3.86
  -2  -9 -15   22.03    9.86
  -2  -9 -16    5.27   10.29
  -2   9 -16    5.12    3.55
  -2  -9 -17   10.14   10.25
  -2   9 -17    7.75    3.87
  -2   9 -18   -3.83    4.01
  -2  -9 -18    4.08   10.42
  -2   9 -19   46.33    6.40
  -2  -9 -19   37.56   11.70
  -2  -9 -20   15.12   11.40
  -2   9 -20    1.96    4.15
  -2   9 -21    7.51    4.45
  -2  -9 -21   22.53   12.00
  -2  -9 -22    5.72   12.58
  -2   9 -22    5.60    4.85
   2 -10 -21   14.38   11.74
   2  10 -21   33.43    5.58
  -2  10  21   30.28   30.42
  -2 -10  21   37.77   32.70
   2 -10 -20   10.23   10.88
  -2 -10  20   34.16   29.88
   2  10 -20   12.41    4.31
  -2  10  20   56.57   28.82
   2 -10 -19   -6.82   10.45
  -2 -10  19    5.24   27.97
  -2  10  19   -9.70   28.13
   2  10 -19    6.74    4.10
  -2 -10  18  -14.81   26.99
   2 -10 -18    3.56   10.08
  -2  10  18    8.42   25.21
   2  10 -18    3.54    3.68
   2 -10 -17   33.60   10.15
   2  10 -17   16.51    4.14
  -2  10  17    8.36   24.15
  -2 -10  17    5.77   24.21
  -2  10  16   28.23   23.02
   2 -10 -16   33.09   10.74
   2  10 -16   47.78    5.88
  -2 -10  16    9.14   23.81
   2  10 -15   53.67    6.44
   2 -10 -15   50.48   10.76
  -2 -10  15   59.34   23.63
  -2  10  15    9.85   21.27
  -2  10  14   83.15   24.32
  -2 -10  14   90.11   24.97
   2 -10 -14  117.07   17.68
   2  10 -14  160.58   15.34
   2  10 -13   17.86    3.65
  -2 -10  13   18.01   18.04
  -2  10  13   13.13   17.66
   2 -10 -13   27.90    8.73
  -2 -10  12   69.46   20.77
   2  10 -12   92.29    9.63
   2 -10 -12   82.06   12.81
  -2  10  12   52.69   18.14
   2  10 -11   87.84    9.20
  -2  10  11   34.26   17.77
  -2 -10  11   69.93   19.14
  -2  10  10    1.45   14.88
   2  10 -10    1.76    3.01
  -2 -10  10   -5.97   16.73
  -2  10   9   72.12   18.18
  -2 -10   9   97.99   20.37
   2  10  -9  111.60   11.19
   2 -10  -9   86.10   13.63
  -2 -10   8  208.49   27.11
  -2  10   8  167.66   22.43
  -2  10   8  207.56   26.17
   2 -10  -8  212.05   23.91
  -2 -10   7   18.43    9.90
  -2  10   7    8.03    9.21
   2  10  -7   19.65    3.49
  -2  10   7    8.60    3.71
   2 -10  -7   18.49    7.85
  -2 -10   6   19.62    7.44
  -2  10   6   23.90    6.96
   2  10  -6   14.95    5.92
   2 -10  -6   24.67    7.91
  -2  10   5   78.18   11.35
  -2 -10   5   98.79   11.48
   2 -10  -5  114.86   11.78
   2 -10  -5  128.57   12.98
   2  10  -5  103.85   11.41
   2 -10  -4   36.41    6.01
  -2  10   4   33.29    5.27
   2 -10  -4   55.17    8.35
  -2 -10   4   32.82    5.17
   2  10  -4   38.15    5.70
  -2  10   3   12.70    2.76
   2  10  -3    8.47    3.53
   2 -10  -3   13.79    7.33
   2 -10  -3   13.98    3.77
  -2 -10   3   10.80    2.50
   2 -10  -2   14.08    7.33
  -2 -10   2    7.15   11.21
  -2  10   2    6.30    1.60
  -2  10   2    7.52    3.17
   2 -10  -1  193.45   21.80
  -2  10   1  211.63   20.66
   2  10  -1  201.23   20.61
  -2 -10   1  169.24   23.32
   2 -10   0   44.14    8.92
   2  10   0   47.34    5.79
  -2 -10   0   58.48   11.15
   2  10   1    1.01    2.74
   2 -10   1   -4.06    7.11
  -2 -10  -1    2.16    8.74
   2 -10   2   32.62    4.14
   2  10   2   32.04    4.12
   2 -10   2   39.27    8.47
   2  10   2   35.09    4.66
  -2 -10  -2   46.33    9.59
  -2 -10  -3    0.62    8.29
   2  10   3   -1.79    2.78
   2  10   3    0.58    2.50
   2 -10   3    1.70    2.56
   2 -10   3   -5.42    8.68
   2 -10   4   15.69    3.25
   2  10   4   11.36    3.50
  -2 -10  -4   12.86    8.44
   2 -10   4   25.08    9.46
   2  10   4   15.03    3.18
   2 -10   5  235.03   25.31
   2 -10   5  239.64   22.98
  -2  10  -5  261.43   23.11
   2  10   5  192.24   22.90
  -2  10  -6    5.92    3.18
  -2 -10  -7   66.02   12.97
  -2  10  -7   85.17    9.09
  -2  10  -8    1.11    3.10
  -2 -10  -8   -4.78    9.33
  -2  10  -9    1.96    3.18
  -2 -10  -9   -2.64    9.64
  -2  10 -10   55.44    6.56
  -2 -10 -10   42.55   11.31
  -2  10 -11  114.92   11.90
  -2 -10 -11   90.52   15.38
  -2  10 -12  119.10   12.30
  -2 -10 -12   94.62   15.60
  -2 -10 -13   28.93   11.01
  -2  10 -13   47.90    5.91
  -2 -10 -14   27.53   10.62
  -2  10 -14   33.95    4.95
  -2  10 -15   33.40    5.10
  -2 -10 -15   31.26   10.73
  -2  10 -16    3.57    3.77
  -2 -10 -16   -3.06   10.77
  -2  10 -17   75.48    8.38
  -2 -10 -17   35.97   13.09
  -2 -10 -18   38.58   12.99
  -2  10 -18   55.14    7.05
  -2 -10 -19   32.72   13.33
  -2  10 -19   66.72    7.88
  -2  10 -20   -0.28    4.39
  -2 -10 -20    8.26   12.03
  -2 -10 -21   15.80   12.68
  -2  10 -21   25.71    5.41
  -2 -11  21   10.08   30.74
   2 -11 -21   -1.76   12.25
   2 -11 -20    1.72   11.36
   2  11 -20    0.65    4.41
   2 -11 -19   13.37   11.69
  -2 -11  19   45.84   28.47
  -2  11  19    7.76   24.59
   2  11 -19   15.60    4.61
  -2 -11  18   23.91   26.40
  -2  11  18    8.31   23.84
   2  11 -18   23.45    4.81
   2 -11 -18   11.95   10.56
   2  11 -17    4.85    3.93
  -2 -11  17    8.37   24.77
   2 -11 -17   -2.11   10.60
  -2  11  17   -4.09   22.12
   2  11 -16   76.87    8.68
  -2 -11  16   58.46   25.15
  -2  11  16   38.88   21.27
   2 -11 -16   74.19   13.33
   2 -11 -15   -4.99    9.83
  -2 -11  15    6.67   21.51
  -2  11  15    3.02   19.42
   2  11 -15    2.58    3.57
  -2  11  14   -6.69   18.21
  -2 -11  14    3.96   19.67
   2 -11 -14   13.59    9.75
   2  11 -14   -2.49    3.41
   2 -11 -13   89.60   14.12
  -2 -11  13   92.27   22.22
  -2  11  13   60.09   19.50
   2  11 -13  106.61   10.95
   2 -11 -12   29.75   10.71
  -2  11  12   35.43   16.52
   2  11 -12   59.93    6.68
  -2 -11  12   47.28   19.25
  -2  11  11  -12.42   15.57
   2  11 -11   -4.90    3.37
  -2 -11  11  -15.55   18.52
  -2  11  10    8.29   15.65
  -2 -11  10    1.44   18.52
   2  11 -10    1.59    3.33
  -2  11   9   79.22   10.38
  -2  11   9   76.11   16.39
   2  11  -9  118.25   10.47
  -2 -11   9   73.64   17.56
   2 -11  -9   86.32   13.49
   2  11  -8   -0.74    3.46
  -2  11   8    3.17    9.64
   2 -11  -8   -8.28    9.11
  -2 -11   8   17.86   11.16
  -2  11   8    0.51    3.46
  -2 -11   7    1.91    7.86
  -2  11   7    9.81    7.39
   2  11  -7    8.95    3.51
   2 -11  -7    6.43    8.58
   2 -11  -6   55.22    8.13
  -2 -11   6   49.59    8.11
   2 -11  -6   67.37   10.06
  -2  11   6   46.30    7.73
  -2  11   5   28.86    5.71
  -2 -11   5   36.85    5.79
   2 -11  -5   50.69    9.10
   2 -11  -5   35.34    6.42
  -2  11   4    7.04    3.15
   2 -11  -4    7.25    8.14
  -2 -11   4    6.37    2.84
  -2  11   3  110.33   11.60
   2 -11  -3  123.85   14.60
  -2  11   3  129.93   12.23
   2 -11  -2  114.12   15.23
  -2 -11   2  127.65   18.02
  -2  11   2  123.95   13.03
   2 -11  -1   -1.55    7.94
  -2 -11   1   -8.55   11.43
   2  11  -1   -0.46    3.11
   2 -11   0   26.81    8.96
   2  11   0   25.22    4.39
  -2 -11   0   38.71   11.81
   2  11   1   -0.36    2.82
   2 -11   1   -3.63    8.37
  -2 -11  -1  -14.57   10.31
   2  11   2  204.25   21.58
   2 -11   2  241.22   23.56
  -2 -11  -2  217.62   23.92
   2 -11   3   10.05    9.70
   2  11   3    1.50    3.04
  -2 -11  -3   -6.81    9.55
   2 -11   3    2.30    2.46
   2 -11   4    3.68    2.77
   2 -11   4   -2.42    9.94
   2  11   4    2.10    3.06
  -2 -11  -4    2.02    9.61
  -2  11  -5   69.12    6.93
   2  11   5   40.89    6.71
   2 -11   5   61.23   12.91
   2 -11   5   61.63    6.69
  -2  11  -6   -0.31    3.48
   2  11   6    0.95    3.15
  -2 -11  -7   45.73   12.03
  -2  11  -7   60.72    7.12
  -2 -11  -8   25.86   10.41
  -2  11  -8   22.15    4.33
  -2 -11  -9   70.03   12.61
  -2  11  -9   67.40    7.96
  -2 -11 -10   39.29   11.53
  -2  11 -10   49.29    6.26
  -2  11 -11   13.98    3.73
  -2 -11 -11   -7.24   10.15
  -2  11 -12    4.74    3.52
  -2 -11 -12   12.24    9.82
  -2  11 -13   83.09    9.30
  -2 -11 -13   75.62   14.10
  -2 -11 -14    9.21   10.80
  -2  11 -14    6.44    3.84
  -2 -11 -15   11.30   10.73
  -2  11 -15   14.70    4.17
  -2 -11 -16    3.85   10.83
  -2  11 -16   -3.05    3.92
  -2  11 -17    3.95    4.08
  -2 -11 -17   -2.82   11.78
  -2  11 -18   31.31    5.60
  -2 -11 -18   22.45   11.86
  -2 -11 -19    9.73   11.82
  -2  11 -19   16.91    4.81
  -2 -11 -20   17.23   12.66
  -2  11 -20    1.32    4.71
   2 -12 -20   -6.66   12.45
  -2 -12  20   -5.59   30.74
   2  12 -20    6.59    4.53
   2 -12 -19    1.48   12.24
   2  12 -19   -0.39    4.48
   2 -12 -18    6.64   11.23
  -2 -12  18  -17.91   24.71
   2  12 -18   -1.51    4.30
   2 -12 -17   -1.41   11.30
  -2 -12  17  -16.09   24.54
   2  12 -17    5.63    3.95
   2  12 -16    5.75    3.90
  -2 -12  16   -0.53   23.58
   2 -12 -16   -4.39   10.77
  -2 -12  15   82.12   25.97
   2  12 -15  119.76   12.40
   2 -12 -15   93.28   15.99
   2 -12 -14   -1.57   10.18
   2  12 -14    0.11    3.57
  -2 -12  14  -15.43   21.26
   2 -12 -13   16.83   10.18
   2  12 -13   19.50    4.34
  -2 -12  13   13.62   21.18
   2  12 -12   -0.42    3.47
  -2 -12  12   39.41   20.46
  -2  12  11   31.29    6.25
   2  12 -11   68.89    6.48
  -2 -12  11   30.11   17.98
   2  12 -10   49.64    5.90
  -2 -12  10   40.34   14.01
  -2  12  10   33.26    5.75
  -2  12   9   29.66    5.67
   2  12  -9   57.96    6.04
   2 -12  -9   47.87   10.70
  -2 -12   9   27.12   11.75
  -2 -12   8    1.31    8.37
  -2  12   8   -4.10    3.59
   2 -12  -8    6.68    9.22
   2  12  -8    2.59    3.86
  -2 -12   7   30.55    7.90
   2  12  -7   48.41    6.06
   2 -12  -7   33.50   10.48
  -2 -12   6    2.33    5.16
   2 -12  -6  -10.73    9.01
   2 -12  -5  166.54   16.72
  -2 -12   5  126.87   13.71
   2 -12  -4   13.85    8.62
  -2 -12   4   -0.22    1.51
   2 -12  -3   24.73    9.36
  -2  12   3   12.57    3.91
   2 -12  -2    8.79    9.65
  -2  12   2   13.54    3.83
  -2 -12   2   20.32   13.72
  -2 -12   1    6.57   13.18
   2 -12  -1   -1.68    8.95
   2  12   0   43.85    5.77
  -2 -12   0   18.68   13.07
   2 -12   0   53.26   10.17
   2 -12   1   -1.71    9.56
   2  12   1    5.74    3.48
   2 -12   2   73.13   12.14
  -2 -12  -2   57.80   13.09
   2  12   2   64.42    7.56
   2  12   3   -1.04    3.23
  -2 -12  -3    0.25   10.65
   2 -12   3    8.97   11.40
   2 -12   4   60.18    6.73
  -2 -12  -4   81.99   12.79
   2  12   4   56.13    7.23
   2 -12   4  107.67   14.58
  -2  12  -5  120.37   10.26
   2 -12   5  108.90   17.09
   2 -12   5   93.91    9.67
   2  12   5   65.84    9.84
   2  12   6    0.83    3.75
  -2  12  -6    6.62    4.01
   2 -12   6    6.06    3.63
   2  12   7   17.53    4.82
  -2  12  -7   42.63    5.25
  -2  12  -8   -2.95    4.02
  -2 -12  -8    7.36   10.42
  -2 -12  -9    5.09   10.72
  -2  12  -9    3.69    3.91
  -2  12 -10   78.62    8.88
  -2 -12 -10   58.86   13.42
  -2  12 -11  407.60   38.91
  -2 -12 -11  306.28   40.58
  -2 -12 -12   29.36   11.76
  -2  12 -12   22.22    4.65
  -2  12 -13   10.57    4.05
  -2 -12 -13   31.03   11.41
  -2 -12 -14    8.64   12.08
  -2  12 -14    4.28    4.03
  -2  12 -15   16.87    4.55
  -2 -12 -15    5.92   12.11
  -2  12 -16   -2.21    4.33
  -2 -12 -16   -0.30   12.21
  -2  12 -17   53.01    6.85
  -2 -12 -17   13.73   13.12
  -2 -12 -18   50.85   14.93
  -2  12 -18   67.41    8.37
  -2 -12 -19   -1.91   13.30
  -2  12 -19   -3.22    4.73
   2  13 -19   47.66    6.95
   2 -13 -19   26.30   13.92
   2  13 -18    6.52    4.58
   2 -13 -18    2.17   12.50
   2  13 -17    6.79    4.54
   2 -13 -17   18.19   11.99
   2  13 -16   20.21    4.79
  -2 -13  16   12.10   26.68
   2 -13 -16   11.25   11.71
  -2 -13  15   41.68   25.51
   2  13 -15   62.18    7.45
   2 -13 -15   31.81   12.83
   2  13 -14   -0.36    3.92
  -2 -13  14    4.73   22.20
   2 -13 -14   11.55   11.19
   2 -13 -13  -15.10   10.96
  -2  13  13   -3.20    4.15
   2  13 -13   -1.88    4.16
  -2  13  12    4.06    4.01
   2  13 -12    2.67    4.04
  -2 -13  12   -7.78   15.04
  -2 -13  11   45.18   13.98
  -2  13  11   39.41    7.23
  -2 -13  10    0.40   10.41
   2  13 -10    5.71    4.13
  -2  13  10    5.56    3.66
   2 -13 -10    7.32    9.88
  -2 -13   9  145.00   21.04
  -2  13   9  147.85   19.61
   2 -13  -9  192.83   22.22
   2  13  -8   18.22    4.50
  -2 -13   8    5.74    6.48
   2 -13  -8   19.46    9.68
   2 -13  -7  103.06   15.75
  -2 -13   7   87.17   13.09
  -2 -13   6    2.90    3.63
   2 -13  -6    1.19    9.80
  -2 -13   5    6.39    2.04
   2 -13  -5   16.78    9.52
   2 -13  -4   38.08   10.16
  -2  13   4   14.11    4.22
   2 -13  -3   27.00   10.50
  -2  13   3   34.35    5.14
  -2  13   2   -0.43    3.53
  -2 -13   2   11.44   15.07
   2 -13  -2   -9.76    9.93
  -2 -13   1   17.62   15.34
   2 -13  -1   31.06   10.59
   2  13   0   40.72    5.78
  -2 -13   0   48.28   15.22
   2 -13   0   37.65   11.26
  -2 -13  -1   23.99   13.59
   2  13   1   20.48    4.40
   2 -13   1   14.48   10.24
   2 -13   2   15.65   11.97
   2  13   2    9.29    3.69
  -2 -13  -2   16.44   12.77
   2  13   3    3.16    3.56
  -2 -13  -3    5.77   11.63
   2 -13   3    0.55   13.00
   2  13   4   36.69    5.42
  -2 -13  -4   31.70   12.44
   2 -13   5  112.18   16.07
  -2  13  -5  223.29   16.06
   2 -13   5  177.51   22.06
  -2 -13  -5  168.47   19.28
   2  13   5  124.47   15.46
  -2  13  -6   23.30    4.69
   2  13   6   12.80    3.82
   2  13   7   73.41   11.39
  -2  13  -7  157.18   11.93
   2  13   8   -4.48    3.76
  -2  13  -8    3.74    4.12
  -2  13  -9   55.29    7.09
  -2 -13  -9   36.49   12.50
  -2  13 -10   23.05    4.78
  -2 -13 -10   -5.29   11.65
  -2  13 -11    8.43    4.34
  -2 -13 -11   10.53   11.73
  -2 -13 -12    2.73   12.14
  -2  13 -12   11.37    4.40
  -2  13 -13   14.15    4.71
  -2 -13 -13   20.55   12.18
  -2 -13 -14   23.03   12.96
  -2  13 -14   25.70    5.30
  -2 -13 -15    7.27   13.30
  -2  13 -15   28.28    5.35
  -2 -13 -16   25.15   13.23
  -2  13 -16   32.04    5.78
  -2  13 -17   12.97    5.00
  -2 -13 -17   23.70   13.31
  -2  13 -18   -3.14    4.74
  -2 -13 -18   26.80   13.90
  -2 -13 -19    5.81   14.34
   2 -14 -18   10.43   13.40
   2  14 -18   -1.13    4.89
   2  14 -17    7.92    4.79
   2 -14 -17    4.79   12.70
   2 -14 -16   15.90   12.43
  -2  14  16   12.03    5.21
   2  14 -16   21.09    4.84
   2 -14 -15   11.90   11.92
   2  14 -15   21.86    5.01
  -2  14  15   12.67    5.15
  -2  14  14    4.60    4.71
   2 -14 -14   11.61   11.48
   2  14 -14   18.90    4.81
  -2  14  13    6.69    4.49
   2  14 -13   12.18    4.46
   2  14 -12   22.66    4.95
  -2  14  12    8.55    4.33
  -2  14  11   15.13    4.56
   2  14 -11   35.65    5.27
  -2  14  10   90.19   13.24
   2 -14 -10  137.26   17.10
   2  14  -9   14.19    4.46
   2 -14  -9   19.96   10.57
  -2  14   9    4.31    3.74
   2  14  -8    2.53    4.33
   2 -14  -8   -7.83   10.40
   2  14  -7   44.92    6.35
   2 -14  -7   22.49   11.37
   2 -14  -6   30.02   11.00
   2 -14  -5   86.18   14.02
  -2  14   4   -0.79    3.65
   2 -14  -4   -1.56   10.75
  -2  14   3   28.39    5.08
   2 -14  -3   51.97   11.24
   2 -14  -2   13.98   10.39
  -2 -14   2   22.98   15.28
  -2 -14   1   21.68   15.26
   2 -14  -1    9.53   10.70
  -2 -14   0  121.50   19.20
   2 -14   0  103.87   16.13
  -2 -14  -1  101.35   17.44
   2  14   1   96.84   10.64
   2 -14   1   89.87   15.70
   2 -14   2   39.25   12.89
   2  14   2   31.71    5.12
  -2 -14  -2   30.02   13.44
  -2 -14  -3    3.92   11.90
   2 -14   3   -0.93   13.11
   2  14   3    1.75    3.51
   2 -14   4   -5.89   14.69
  -2 -14  -4    6.54   11.61
   2  14   4    5.17    3.62
  -2 -14  -5  383.51   40.39
   2  14   5  292.32   37.95
   2 -14   5  407.05   41.68
  -2  14  -6   36.78    5.56
   2  14   6   20.37    4.55
   2  14   7    7.61    3.82
  -2  14  -7   18.60    4.88
   2  14   8    1.04    3.59
  -2  14  -8   -5.16    4.26
  -2 -14  -9   -2.74   12.48
   2  14   9   14.54    4.56
   2  14  10   -7.00    4.12
  -2  14 -10   -2.08    4.53
  -2 -14 -10    1.57   12.11
  -2  14 -11   70.83    8.49
  -2 -14 -11   38.49   14.87
  -2  14 -12    1.95    4.68
  -2 -14 -12    9.47   12.80
  -2 -14 -13   23.64   14.23
  -2  14 -13   36.13    6.12
  -2  14 -14   -2.74    4.83
  -2 -14 -14   -7.10   13.49
  -2  14 -15    0.73    4.77
  -2 -14 -15  -10.99   13.92
  -2  14 -16   25.43    5.52
  -2 -14 -16   13.24   14.14
  -2  14 -17    3.07    4.90
  -2 -14 -17   17.04   14.93
   2  15 -16    1.29    5.06
  -2  15  16    2.47    4.84
   2 -15 -16    1.32   13.15
   2  15 -15   48.61    6.39
  -2  15  15   21.71    5.94
   2 -15 -15   19.73   13.26
   2 -15 -14  -12.09   12.52
  -2  15  14    2.23    4.42
   2  15 -14    3.81    4.82
   2  15 -13    4.81    4.76
  -2  15  13    3.00    4.17
   2  15 -12   54.97    6.90
  -2  15  12   36.57    6.11
  -2  15  11   30.57    5.83
   2 -15 -11   29.73   13.05
   2  15 -10    0.14    4.85
  -2  15  10    3.84    3.76
   2 -15 -10    3.92   11.65
  -2  15   9   53.19    8.62
   2 -15  -9   69.88   14.46
   2  15  -8    0.96    4.55
   2 -15  -8   11.38   11.74
   2  15  -7   70.71    8.68
   2 -15  -7   53.35   13.49
   2 -15  -6   20.20   11.62
   2 -15  -5    5.69   11.17
  -2  15   4    6.03    3.82
   2 -15  -4    7.78   10.86
  -2  15   3   76.26    8.51
   2 -15  -3   50.37   13.36
   2 -15  -2    3.53   11.09
  -2 -15   2   -0.81   16.17
   2 -15  -1   83.74   14.52
  -2 -15   1   80.83   18.20
  -2 -15   0   50.24   15.80
   2 -15   0   -0.84   11.58
  -2 -15  -1   74.64   17.39
   2 -15   1   81.57   15.00
   2  15   1   72.77    8.64
   2 -15   2    3.16   13.42
   2  15   2    0.69    3.74
  -2 -15  -2    5.93   13.94
   2 -15   3  124.30   18.14
  -2 -15  -3  119.30   17.48
   2  15   3   93.17   10.77
  -2 -15  -4   -5.49   12.70
   2 -15   4   20.62   15.24
   2  15   4   13.17    3.90
  -2  15  -5   38.46    5.73
   2  15   5   18.39    4.52
  -2 -15  -5   36.52   13.19
   2 -15   5   25.55   15.80
  -2 -15  -6  100.14   17.20
   2  15   6   78.55   11.42
   2  15   7   29.84    5.56
  -2  15  -7   55.17    6.69
  -2  15  -8   28.90    5.56
   2  15   8   17.84    4.49
  -2  15  -9   86.77    8.33
  -2 -15  -9   52.41   14.19
   2  15   9   43.70    7.21
  -2 -15 -10   17.47   13.18
   2  15  10   17.26    5.04
  -2  15 -10   44.80    6.06
  -2 -15 -11   31.33   13.75
  -2  15 -11   30.85    5.81
   2  15  11   17.62    4.96
  -2  15 -12   -1.07    5.18
   2  15  12    1.89    4.29
  -2 -15 -12   13.49   13.35
  -2  15 -13    3.84    4.97
  -2 -15 -13   -2.49   14.17
  -2  15 -14   21.18    5.86
  -2 -15 -14   14.76   14.37
  -2  15 -15   61.28    8.39
  -2 -15 -15   60.46   16.33
  -2  15 -16    8.49    5.25
  -2 -15 -16  -11.56   14.74
   2 -16 -15   10.48   13.78
  -2  16  15    3.50    4.71
   2  16 -15   14.22    5.38
   2  16 -14   10.94    5.16
  -2  16  14    1.15    4.41
   2 -16 -14   -1.73   13.86
   2  16 -13   23.41    5.47
  -2  16  13   14.27    4.59
  -2  16  12   20.53    4.76
   2  16 -12   24.81    5.92
  -2  16  11   25.56    5.66
   2 -16 -11   30.53   13.29
   2  16 -11   55.80    6.83
  -2  16  10    5.19    4.01
   2  16 -10    7.57    5.13
   2 -16 -10    2.92   12.27
   2  16  -9    5.72    5.19
   2 -16  -9   -6.11   11.81
   2 -16  -8    0.64   12.25
   2  16  -8   -2.67    4.94
   2 -16  -7   -1.57   12.22
   2  16  -7    1.75    5.09
   2 -16  -6   29.80   13.17
  -2  16   5   34.69    5.44
   2 -16  -5   22.55   12.62
   2 -16  -4   11.80   11.86
  -2  16   4    6.89    3.92
   2 -16  -3   11.78   12.14
  -2 -16   2   -1.30   17.81
   2 -16  -2  -12.77   12.21
  -2 -16   1   11.05   17.26
   2 -16  -1   25.87   12.43
  -2 -16   0   12.60   16.92
   2 -16   0   42.13   13.52
  -2 -16  -1   92.14   19.63
   2 -16   1   97.76   17.89
   2 -16   2  150.78   19.95
   2  16   2  119.21   13.36
  -2 -16  -2  146.08   20.84
   2 -16   3  -17.00   16.44
   2  16   3    1.66    3.89
  -2 -16  -3    7.29   14.51
   2 -16   4    1.93   16.82
  -2 -16  -4   24.44   13.90
   2  16   4    4.63    3.86
  -2 -16  -5   92.62   17.10
   2 -16   5   63.48   19.29
   2  16   5   72.60   10.50
  -2  16  -6    3.91    4.98
  -2 -16  -6   12.09   13.42
   2  16   6   -0.67    3.84
   2  16   7    2.74    3.98
  -2  16  -7    4.44    5.27
   2  16   8   -5.16    3.83
  -2  16  -8   -3.63    5.39
  -2  16  -9   53.18    6.61
   2  16   9   15.16    5.01
   2  16  10    3.46    3.92
  -2  16 -10    9.29    5.35
  -2  16 -11   37.26    6.58
   2  16  11   22.11    5.42
  -2 -16 -11   34.10   14.27
   2  16  12   -0.14    4.45
  -2  16 -12    4.78    5.46
  -2 -16 -12   11.22   13.92
  -2 -16 -13    4.05   14.70
   2  16  13    1.42    4.72
  -2  16 -13    4.95    5.33
  -2  16 -14    4.54    5.46
   2  16  14   -1.33    4.88
  -2 -16 -15   16.18   16.02
  -2  16 -15   26.65    6.26
   2  17 -13   24.82    5.86
  -2  17  13    9.48    4.53
   2  17 -12    7.81    5.49
  -2  17  12    5.19    4.34
   2 -17 -12   10.07   14.19
   2 -17 -11    6.07   14.39
  -2  17  11   20.10    5.25
   2 -17 -10   15.23   14.15
   2  17 -10   -0.49    5.42
  -2  17  10    3.92    3.97
   2 -17  -9   27.37   14.83
   2  17  -9   60.58    8.18
   2  17  -8   23.74    5.88
   2 -17  -8   -3.07   13.36
   2 -17  -7   21.58   13.25
   2  17  -7   -0.47    5.38
   2 -17  -6   -3.24   12.57
   2 -17  -5   -7.65   12.49
  -2  17   5    5.60    4.07
   2 -17  -4    9.21   12.69
   2 -17  -3   29.42   13.38
   2 -17  -2    2.91   13.15
  -2 -17   1   55.54   20.06
   2 -17  -1   64.17   15.37
  -2 -17   0   -2.25   17.97
   2 -17   0   -6.44   14.45
   2 -17   1   55.08   16.73
  -2 -17  -1   43.34   19.48
   2 -17   2   40.94   16.69
  -2 -17  -2   24.73   17.90
   2  17   2   16.14    4.48
   2 -17   3   51.21   18.94
  -2 -17  -3  100.45   19.19
   2  17   3   75.50    8.94
   2  17   4   61.25    7.90
   2 -17   4   87.13   19.20
  -2 -17  -4   78.23   17.71
   2  17   5    3.73    4.00
  -2 -17  -5   22.91   15.13
  -2  17  -5   13.97    5.34
  -2 -17  -6   15.22   14.01
   2  17   6   -1.05    3.91
  -2  17  -6    0.17    5.33
   2  17   7   25.96    5.20
  -2 -17  -7   20.89   15.25
  -2  17  -7   40.36    6.83
   2  17   8   36.22    6.76
  -2  17  -8   94.86    8.47
   2  17   9   26.56    5.63
  -2  17  -9   55.41    7.27
   2  17  10   -2.33    4.25
  -2  17 -10   -2.61    5.84
  -2 -17 -10  -10.16   14.86
  -2 -17 -11   10.99   15.21
   2  17  11    4.99    4.34
  -2  17 -11   -6.36    5.81
  -2  17 -12    6.54    5.95
  -2 -17 -12   -3.82   15.60
   2  17  12    3.20    4.49
  -2 -17 -13   15.11   15.83
  -2  17 -13    0.18    5.81
   2  17  13    2.90    4.75
  -2  18  11   14.17    4.58
   2  18 -11   25.97    6.39
   2 -18 -11    9.13   15.17
   2 -18 -10   -0.37   14.82
   2  18 -10    5.72    5.73
   2 -18  -9    6.22   14.32
   2  18  -9   11.38    5.62
   2 -18  -8   -1.78   13.97
   2  18  -8    4.86    5.52
   2 -18  -7   13.96   13.44
   2  18  -7    1.66    5.66
  -2  18   6    8.20    4.14
   2  18  -6   16.82    5.72
   2 -18  -5   30.50   14.15
   2 -18  -4   11.33   13.71
   2 -18  -3   19.43   14.03
   2 -18  -2   35.13   14.72
  -2 -18   1   13.19   19.80
   2 -18  -1   29.65   14.83
  -2 -18   0   -0.48   18.74
   2 -18   0   18.25   16.43
   2 -18   1   42.33   17.03
  -2 -18  -1   41.72   19.41
  -2 -18  -2   39.74   19.14
   2 -18   2   26.15   17.95
  -2 -18  -3    8.62   17.56
   2  18   3    3.85    4.11
   2 -18   3   -0.43   17.70
  -2 -18  -4   32.90   17.33
   2 -18   4   29.81   19.00
   2  18   4   20.42    4.85
   2  18   5   -0.88    4.17
  -2  18  -5   11.33    5.43
  -2 -18  -5   -0.41   16.40
   2  18   6    3.52    3.95
  -2  18  -6    0.18    5.91
  -2 -18  -6  -13.42   16.11
  -2  18  -7   20.98    6.14
   2  18   7    6.92    4.08
  -2 -18  -7   -4.00   15.90
   2  18   8   -2.55    4.11
  -2  18  -8   14.96    6.09
   2  18   9    0.98    4.30
  -2  18  -9   -0.93    6.11
   2  18  10    8.74    4.50
  -2  18 -10   13.51    6.27
  -2  18 -11   51.11    8.17
  -2 -18 -11    5.25   16.95
   2  19  -8   -0.35    5.89
   2 -19  -8    2.99   15.14
   2  19  -7    5.26    6.15
   2 -19  -7   21.83   14.91
   2 -19  -6    8.86   15.14
   2  19  -6   -1.17    5.54
   2 -19  -5    8.89   14.78
   2 -19  -4   -9.64   15.01
   2 -19  -3   18.57   15.57
   2 -19  -2   56.38   17.52
   2 -19  -1   10.36   17.04
  -2 -19   1   55.26   21.07
  -2 -19   0    3.08   20.20
   2 -19   0  -27.14   18.13
   2 -19   1    8.94   18.16
  -2 -19  -1  -19.75   21.01
   2 -19   2   28.30   19.93
  -2 -19  -2    2.51   20.13
   2 -19   3  -24.39   20.50
  -2 -19  -3   -9.45   19.77
  -2 -19  -4  -21.74   19.03
   2  19   4   -0.25    4.15
  -2 -19  -5    5.53   19.34
  -2  19  -5    6.21    5.83
   2  19   5   -1.67    4.20
   2  19   6    4.79    4.39
  -2  19  -6   24.89    6.44
  -2 -19  -6   12.02   18.31
  -2 -19  -7   -7.80   17.72
  -2  19  -7    2.98    6.16
   2  19   7    3.65    4.33
   2  19   8   15.64    5.01
  -2 -19  -8   36.57   17.99
  -2  19  -8   44.10    7.12
   2 -20  -4   44.60   17.83
   2 -20  -3   10.53   17.04
   2 -20  -2   -9.73   18.24
   2 -20  -1   18.50   18.17
  -2 -20   0    2.17   22.67
   2 -20   0   13.11   19.57
  -2 -20  -1  -25.29   22.44
   2 -20   1    6.22   20.12
  -2 -20  -2    7.46   21.52
   2 -20   2   -3.89   20.42
  -2 -20  -3  -13.84   21.21
   2 -20   3   -3.46   21.36
  -2  20  -4   10.38    6.17
   3   0 -24   93.03   10.49
  -3   0  24   93.87   50.19
   3   0 -23   -3.84    4.01
   3   0 -22   -3.82    8.36
   3   0 -22    5.23    3.83
   3   0 -21    1.52    3.84
   3   0 -21    7.16    8.26
   3   0 -20   -6.30    7.62
   3   0 -20    5.18    3.59
   3   0 -19   -1.00    2.90
   3   0 -19    2.55    7.25
   3   0 -18   11.90    2.97
   3   0 -18    6.80    6.94
   3   0 -17   -6.36    6.37
   3   0 -17    1.25    2.51
   3   0 -16   29.60    7.46
   3   0 -16   28.45    3.99
   3   0 -15    7.68    5.63
   3   0 -15   -0.41    2.32
   3   0 -14    1.43    5.35
   3   0 -14    0.38    1.93
   3   0 -13    1.50    1.87
   3   0 -13   -3.64    4.95
   3   0 -12  392.15   37.89
   3   0 -12  342.56   38.31
   3   0 -11    0.15    1.55
   3   0 -11   -0.74    4.18
   3   0 -10   89.59    8.99
   3   0 -10   79.80   10.02
   3   0  -9    0.58    1.32
   3   0  -9   -1.91    3.91
   3   0  -8    1.28    1.15
  -3   0   8   -4.26   16.56
  -3   0   8    0.11    1.21
  -3   0   7    3.23    0.90
  -3   0   7   -5.76   15.85
   3   0  -7    0.22    0.94
   3   0  -6  653.07   65.07
  -3   0   6  723.63   67.82
  -3   0   5   -7.32   15.19
   3   0  -5   -0.30    0.66
   3   0  -4  152.61   14.85
  -3   0   4  145.97   14.85
  -3   0   4  159.16   19.03
   3   0  -4  109.00   19.84
  -3   0   3    1.41    7.15
   3   0  -3    6.53   11.06
  -3   0   2   21.67    5.78
   3   0  -2   16.30    6.52
   3   0  -1    0.48    4.89
  -3   0   1    5.91    3.99
   3   0   0  133.57   14.11
   3   0   0  133.27   13.36
  -3   0   0  139.53   13.89
  -3   0   0  134.63   13.36
   3   0   1    0.74    3.00
   3   0   1   -0.01    0.71
  -3   0  -1    2.29    2.75
  -3   0  -1   -0.19    0.69
  -3   0  -2  106.40   11.02
   3   0   2  105.04   10.53
   3   0   2  103.53   11.14
  -3   0  -3   -2.70    2.94
   3   0   3    0.56    1.16
   3   0   3   -0.24    3.86
   3   0   4  378.73   38.91
  -3   0  -4  406.20   38.97
   3   0   4  405.21   39.30
   3   0   5   -0.12    1.67
  -3   0  -5   -2.56    2.13
  -3   0  -6  373.21   37.22
  -3   0  -6  382.47   37.19
   3   0   6  364.75   37.17
   3   0   7    0.33    1.91
  -3   0  -7    1.27    1.39
  -3   0  -8  346.91   34.19
   3   0   8  293.57   36.14
  -3   0  -9    1.62    1.78
   3   0   9   -2.12   10.03
   3   0  10   22.28   10.99
  -3   0 -10   26.84    3.37
  -3   0 -11   -1.67    1.96
   3   0  11   -9.31   12.23
   3   0  12   48.84   14.23
  -3   0 -12   55.12    6.02
   3   0  13   -7.30   16.57
  -3   0 -13   -0.07    2.22
  -3   0 -14  214.84   21.51
   3   0  14  160.16   28.70
   3   0  15   -5.77   19.36
  -3   0 -15   -0.97    2.69
   3   0  16   45.43   21.24
  -3   0 -16   86.49    9.25
   3   0  17  -17.30   20.50
  -3   0 -17   -1.41    3.03
  -3   0 -18  214.46   21.94
  -3   0 -19    0.11    3.47
  -3   0 -20   45.70    6.26
  -3   0 -21    1.96    4.01
  -3   0 -22   50.38    6.90
  -3   0 -23    3.02    4.41
  -3   0 -24  143.45   15.60
  -3   1  24   37.20   49.53
   3   1 -24    5.18    9.53
   3   1 -24   25.20    5.22
   3   1 -23   -3.37    4.12
   3   1 -23   13.79    8.85
   3   1 -22   82.46    9.12
   3   1 -22   67.45   11.97
   3   1 -21   10.28    7.80
   3  -1 -21    6.16    3.58
   3   1 -21    8.10    3.43
   3   1 -20    0.18    7.09
   3  -1 -20   11.10    8.21
   3   1 -20    2.09    3.32
   3  -1 -20    4.19    3.08
   3  -1 -19    6.56    7.46
   3   1 -19    5.22    7.24
   3  -1 -19    5.26    3.13
   3   1 -19    0.08    2.80
   3   1 -18   28.61    7.74
   3  -1 -18   34.43    4.60
   3  -1 -18   25.89    7.92
   3   1 -18   33.70    4.55
   3  -1 -17   -0.84    2.89
   3  -1 -17   -3.01    6.99
   3   1 -17   -4.22    6.72
   3   1 -17    0.65    2.62
   3  -1 -16  163.86   23.94
   3  -1 -16  244.18   23.02
   3   1 -16  189.30   23.82
   3   1 -16  243.51   22.97
   3   1 -15   44.66    5.44
   3   1 -15   36.71    7.74
   3  -1 -15   57.81    5.77
   3  -1 -15   38.87    8.28
   3  -1 -14    2.69    5.36
   3   1 -14    3.46    2.12
   3   1 -14    6.00    5.27
   3  -1 -14    4.89    2.40
   3  -1 -13   15.42    2.38
   3   1 -13   12.03    2.30
   3  -1 -13   10.10    5.05
   3   1 -13   11.37    5.12
   3   1 -12  385.06   43.16
   3   1 -12  445.33   42.77
   3  -1 -12  446.28   42.78
   3  -1 -12  374.28   43.19
   3  -1 -11    2.45    1.66
   3   1 -11    1.64    1.51
   3  -1 -11    2.39    4.49
   3  -1 -10    1.75    1.73
   3  -1 -10    3.25    4.20
   3   1 -10    1.69    1.29
   3  -1  -9    6.42    4.08
   3  -1  -9    5.16    1.45
   3   1  -9    5.40    1.39
   3   1  -8  251.82   25.08
  -3   1   8  289.57   31.73
  -3  -1   8  250.50   25.08
   3  -1  -8  251.21   25.09
  -3   1   7  101.53   10.97
   3   1  -7  117.29   10.98
  -3   1   7  121.36   19.47
  -3   1   6 1270.65  119.24
  -3   1   6 1170.72  117.16
   3   1  -6 1185.07  117.16
   3   1  -5  134.11   12.27
   3  -1  -5  140.20   12.81
  -3  -1   5  111.77   12.26
  -3   1   4  263.21   27.76
   3   1  -4  217.79   27.98
  -3  -1   4  257.71   24.96
   3  -1  -4  260.36   25.31
   3   1  -4  244.16   24.95
  -3   1   3  621.43   69.78
   3  -1  -3  717.69   69.13
   3   1  -3  670.80   70.40
   3   1  -2  150.10   21.59
  -3   1   2  170.03   21.21
  -3   1   2  210.66   20.35
   3   1  -1  158.42   17.48
  -3   1   1  168.91   17.07
  -3   1   0  207.37   20.19
   3  -1   0  191.14   20.19
   3   1   0  197.98   20.16
  -3   1   0  209.13   20.57
  -3  -1   0  210.93   20.16
   3   1   0  220.19   20.72
  -3   1  -1   49.33    5.81
   3   1   1   47.47    6.11
   3  -1   1   52.19    5.06
  -3  -1  -1   50.91    5.00
   3   1   1   46.64    5.00
  -3   1  -2  553.83   52.04
   3   1   2  499.94   51.80
   3   1   2  533.22   52.00
   3   1   2  539.47   52.08
   3  -1   2  532.69   51.83
  -3  -1  -3  327.46   31.12
   3   1   3  292.36   30.84
  -3   1  -3  332.83   31.16
   3   1   3  322.13   31.07
   3   1   3  337.93   31.20
   3  -1   3  310.56   30.86
   3   1   4  739.43   71.42
   3   1   4  683.61   71.32
   3  -1   4  699.61   71.33
   3   1   4  824.09   71.63
  -3  -1  -4  763.41   71.48
  -3  -1  -5  323.99   32.67
  -3   1  -5  327.00   32.51
  -3  -1  -6  123.66   12.80
  -3   1  -6  129.96   12.81
  -3  -1  -6  128.56   13.13
  -3  -1  -7   15.55    2.22
  -3   1  -7   18.98    2.25
   3   1   7   11.35    8.73
  -3  -1  -7   12.44    3.59
   3   1   7   13.33    3.22
   3   1   8  132.10   14.02
  -3  -1  -8  140.86   13.76
   3   1   8  113.99   16.89
  -3   1  -8  133.65   13.76
  -3  -1  -8  138.52   14.22
   3   1   9   95.89   15.47
  -3   1  -9  107.16   10.64
  -3  -1  -9  102.17   10.61
   3   1   9  101.21   10.97
  -3   1 -10  112.08   10.94
  -3  -1 -10  103.00   10.91
   3   1  10   76.87   15.99
  -3   1 -11   16.11    2.72
   3   1  11    3.58   12.92
  -3  -1 -11   18.55    2.66
  -3   1 -12    1.97    2.06
   3   1  12   10.56   13.85
  -3  -1 -12    6.13    2.17
  -3   1 -13   -0.86    2.22
  -3  -1 -13    0.55    2.21
  -3   1 -14   10.09    2.66
  -3  -1 -14    5.71    2.68
  -3  -1 -15   -0.41    2.63
   3   1  15  -11.69   19.78
  -3   1 -15    1.68    2.69
  -3   1 -16    7.84    3.09
  -3  -1 -16    8.99    3.17
   3   1  16    6.21   19.67
  -3  -1 -17   19.21    3.82
   3   1  17   36.14   19.76
  -3   1 -17   18.86    3.70
  -3   1 -18   75.75    8.73
  -3  -1 -18   80.19    8.77
  -3   1 -19    1.72    3.47
  -3  -1 -19    4.20    3.53
  -3   1 -20    4.95    3.73
  -3  -1 -20    4.23    3.75
  -3  -1 -21   19.38    4.36
  -3   1 -21   16.35    4.51
  -3  -1 -22   20.71    4.82
  -3   1 -22   21.48    5.04
  -3  -1 -23    0.82    4.53
  -3   1 -23    9.70    4.52
  -3  -1 -24   13.73    5.25
  -3   1 -24   12.94    5.01
   3   2 -24    8.36    9.25
  -3   2  24   37.28   47.44
  -3  -2  24    6.84   45.89
   3   2 -23   -5.97    8.56
  -3   2  23  -23.40   47.05
   3   2 -23    2.67    4.02
   3   2 -22   12.80    7.97
   3   2 -22   10.94    4.01
   3   2 -21   15.45    7.72
   3   2 -21    5.82    3.71
   3   2 -20   31.16    9.32
   3   2 -20   58.55    6.56
   3   2 -19   13.71    3.39
   3   2 -19    3.81    6.93
   3   2 -18   84.11   12.24
   3   2 -18  105.29   10.51
   3  -2 -18   87.29   12.55
   3  -2 -17   36.80    8.57
   3   2 -17   40.58    4.91
   3   2 -17   29.44    7.46
   3  -2 -16    2.51    6.45
   3   2 -16    2.98    2.58
   3   2 -16    0.86    6.09
   3   2 -15   44.41    4.77
   3  -2 -15   32.85    7.84
   3   2 -15   26.36    7.17
   3   2 -14    5.51    2.18
   3  -2 -14    5.03    6.07
   3  -2 -13   12.38    5.82
   3   2 -13    7.32    1.98
   3  -2 -12  176.31   21.55
   3   2 -12  214.08   20.77
   3  -2 -11  103.39   13.23
   3   2 -11  124.19   12.24
   3  -2 -10   40.50    5.98
   3   2 -10   38.90    4.27
   3  -2  -9  291.41   31.51
   3   2  -9  315.42   31.01
  -3  -2   8  436.72   42.96
  -3   2   8  437.62   47.86
   3   2  -8  426.28   42.96
  -3   2   7   22.70    2.69
   3   2  -7   23.85    2.62
  -3   2   7   22.54   15.30
   3  -2  -6   43.38    5.93
  -3   2   6   34.23   14.77
   3   2  -6   46.54    4.87
  -3   2   6   49.77    4.93
   3  -2  -5  117.27   12.04
  -3   2   5  167.97   19.68
   3   2  -5  113.57   11.44
   3   2  -4  107.35   17.62
   3  -2  -4  122.34   13.66
  -3   2   4  120.42   16.95
  -3   2   4  151.47   13.78
   3   2  -4  131.20   13.12
   3  -2  -3   -0.84    2.86
   3   2  -3   -0.27    0.66
  -3   2   3    0.03    1.75
   3  -2  -2   15.05    3.18
   3  -2  -2   17.23    2.67
   3   2  -2   11.85    7.06
  -3   2   2   15.33    2.34
  -3  -2   2   15.20    2.10
  -3   2   2    9.78    5.96
  -3   2   1  800.19   73.91
   3  -2  -1  730.66   73.80
   3   2  -1  730.27   74.23
   3  -2  -1  740.76   73.89
  -3   2   1  699.58   74.06
  -3   2   0  307.85   32.84
   3  -2   0  315.75   32.67
  -3   2   0  356.84   32.68
   3   2   0  312.21   32.97
  -3   2  -1 4933.22  481.19
   3   2   1 4885.15  481.01
   3   2   1 4735.04  481.18
   3   2   1 4669.27  481.22
  -3   2  -2  518.08   46.23
   3  -2   2  456.10   46.23
  -3   2  -2  454.00   46.43
  -3  -2  -2  464.02   46.71
   3   2   2  432.91   46.52
   3   2   2  446.23   46.20
   3   2   2  439.77   46.48
  -3   2  -3 1429.19  139.03
   3  -2   3 1412.31  138.86
  -3  -2  -3 1410.04  139.07
   3   2   3 1465.97  139.04
   3   2   3 1449.04  139.05
   3   2   3 1343.61  138.84
   3   2   4  323.42   32.08
   3   2   4  335.38   32.03
  -3  -2  -4  342.08   32.14
   3   2   4  301.96   31.73
   3  -2   4  350.25   32.10
  -3  -2  -5  218.07   21.40
   3   2   5  208.33   21.34
  -3   2  -5  208.70   21.05
  -3   2  -6    0.33    1.32
  -3   2  -6    0.03    1.23
  -3  -2  -6   -1.11    3.59
  -3   2  -7  108.24   10.83
   3   2   7  103.46   14.42
  -3   2  -7  103.41   10.86
  -3  -2  -7  107.75   10.85
  -3  -2  -7  109.60   11.53
  -3   2  -8  273.25   27.16
  -3  -2  -8  256.74   27.54
  -3   2  -8  291.22   27.19
  -3  -2  -8  260.91   27.17
   3   2   8  224.38   29.31
   3   2   8  272.56   27.49
  -3  -2  -9  243.72   24.46
  -3   2  -9  243.33   24.49
   3   2   9  229.76   27.56
  -3  -2  -9  234.04   24.89
  -3   2  -9  249.58   24.48
  -3  -2 -10    8.82    4.60
  -3   2 -10   11.64    2.94
  -3  -2 -10   10.20    2.11
   3   2  10   -1.78   10.45
  -3   2 -10   11.31    2.20
  -3   2 -11    8.41    3.30
  -3   2 -11    8.84    2.19
  -3  -2 -11   10.77    2.28
  -3  -2 -11   18.26    4.94
   3   2  11   17.80   12.62
  -3  -2 -12   70.24    9.27
  -3   2 -12   71.72    7.90
  -3  -2 -12   78.29    7.92
   3   2  12   53.58   15.70
  -3   2 -12   75.40    8.36
   3   2  13   69.05   20.12
  -3   2 -13  109.89   10.94
  -3   2 -13  101.30   11.37
  -3  -2 -13  102.88   10.94
   3   2  14  262.04   39.79
  -3   2 -14  349.43   34.25
  -3  -2 -14  337.41   34.23
   3   2  15   20.61   18.39
  -3   2 -15   15.93    3.22
  -3  -2 -15   12.83    3.25
   3   2  16   73.89   21.77
  -3  -2 -16   95.28   10.34
  -3   2 -16   97.57   10.32
   3   2  17    9.95   20.44
  -3   2 -17   -1.51    3.06
  -3  -2 -17   -1.60    3.17
  -3  -2 -18   70.61   10.40
  -3  -2 -18   69.80    7.83
  -3   2 -18   65.64    7.87
  -3   2 -19   11.90    3.65
  -3  -2 -19    9.72    7.77
  -3  -2 -19    5.50    3.60
  -3  -2 -20   19.26    8.42
  -3   2 -20   23.36    4.42
  -3  -2 -20   21.88    4.53
  -3  -2 -21   -0.51    4.09
  -3   2 -21    1.10    3.90
  -3  -2 -22   22.98    5.84
  -3   2 -22   24.99    5.09
  -3  -2 -23    4.71    4.75
  -3   2 -23    4.58    4.40
  -3   2 -24   65.95    8.42
  -3  -2 -24   59.46    8.33
  -3   3  24  -35.76   50.06
  -3  -3  24    2.22   45.44
   3   3 -24   -6.80    9.42
  -3  -3  23   18.28   43.19
  -3   3  23   46.32   44.57
   3   3 -23   32.84    5.32
   3   3 -23   24.48    9.17
   3   3 -22   78.61    8.36
   3   3 -22   43.94   11.02
   3   3 -21    2.12    3.65
   3   3 -21    3.45    7.57
   3   3 -20   15.77    7.31
   3   3 -20    8.65    3.45
   3   3 -19    9.81    3.27
   3   3 -19   18.17    7.07
   3   3 -18   24.70    7.47
   3   3 -18   38.05    4.76
   3   3 -17    8.38    2.98
   3   3 -17   17.04    6.24
   3   3 -16    3.94    2.68
   3   3 -15    1.45    2.47
   3   3 -14   31.18    4.01
   3  -3 -14   33.38    7.07
   3  -3 -13    6.65    5.97
   3   3 -13    4.10    2.04
   3  -3 -12  191.49   22.07
   3   3 -12  215.01   21.18
   3  -3 -11   97.67   12.00
   3   3 -11  108.15   10.85
   3  -3 -10   18.79    5.16
   3   3 -10   12.99    2.07
  -3  -3   9   20.92   19.76
  -3   3   9   22.77   20.37
   3   3  -9   20.66    2.61
   3   3  -8  159.18   15.95
  -3  -3   8  144.09   23.82
  -3   3   8  159.32   24.10
   3   3  -7    3.17    1.24
  -3  -3   7    8.80    1.38
  -3  -3   7  -10.10   15.12
  -3   3   7   -2.38   14.49
   3  -3  -6   65.98    8.19
   3   3  -6   71.55    7.19
  -3   3   6   61.82   15.69
  -3  -3   6   73.08   16.66
   3   3  -5  380.06   37.87
  -3   3   5  444.67   41.07
   3  -3  -5  365.84   38.24
  -3  -3   5  446.29   40.97
   3  -3  -4    0.56    3.38
   3   3  -4    1.62    0.89
  -3  -3   4    2.21    8.21
  -3   3   4   -8.64    7.70
   3   3  -4    6.21    9.51
   3  -3  -4   -0.34    9.73
   3   3  -3  277.40   30.08
  -3   3   3  243.54   28.09
  -3  -3   3  225.87   28.04
   3  -3  -3  289.42   30.29
  -3   3   3  289.40   27.30
  -3  -3   2   26.34    6.16
   3  -3  -2   31.49    7.43
   3   3  -2   47.22    7.60
  -3   3   2   32.78    3.54
  -3   3   2   29.24    5.78
   3   3  -2   28.17    3.31
   3  -3  -2   30.02    4.04
   3  -3  -1  118.52   14.02
   3   3  -1  123.83   14.11
   3  -3  -1  131.49   12.91
  -3   3   1  126.94   13.56
  -3  -3   1  113.79   13.34
  -3   3   1  144.48   13.25
   3   3  -1  123.65   12.84
   3   3   0   96.12   12.83
  -3   3   0  126.35   11.92
   3  -3   0  111.20   12.35
  -3  -3   0  117.08   11.96
  -3   3   0  117.67   12.04
   3   3   0   98.92   12.25
  -3   3  -1    5.23    3.30
   3  -3   1    7.37    3.67
   3   3   1    1.49    3.57
   3   3   1    4.40    4.97
   3  -3   1    4.60    2.61
  -3  -3  -1    3.09    3.08
   3   3   2 1030.50  103.34
   3   3   2 1083.98  103.06
   3   3   2  996.50  103.24
   3  -3   2 1054.33  103.25
  -3  -3  -2 1067.33  103.45
   3  -3   2  986.11  103.13
  -3  -3  -2 1037.84  103.22
  -3   3  -2 1008.07  103.22
   3   3   3   16.29    3.59
  -3   3  -3   20.42    3.29
  -3  -3  -3   10.17    4.53
   3   3   3   15.73    2.06
   3  -3   3   17.18    3.65
   3   3   3   19.36    4.56
   3  -3   3   17.99    3.04
  -3   3  -4   48.51    5.50
  -3   3  -4   58.17    5.73
  -3  -3  -4   52.74    7.02
   3   3   4   55.11    6.37
   3  -3   4   58.16    6.44
   3   3   4   53.64    6.84
  -3  -3  -5  158.89   16.06
   3   3   5  153.37   15.93
  -3   3  -5  168.30   15.46
  -3   3  -5  141.76   15.34
  -3   3  -6   14.27    2.02
  -3   3  -6   10.96    2.98
  -3  -3  -6    6.29    4.27
  -3  -3  -7   93.84    8.92
   3  -3   7   61.56   12.09
   3   3   7   81.74   12.93
  -3   3  -7   65.96    9.27
  -3   3  -7   93.07    8.91
  -3  -3  -7   77.46   10.08
  -3  -3  -8   68.31    8.21
   3  -3   8   53.62   11.67
  -3  -3  -8   66.09    6.86
  -3   3  -8   64.74    6.89
   3   3   8   60.14   12.32
   3   3   9   -0.27    9.73
   3  -3   9    6.26    9.71
  -3  -3  -9    5.89    1.81
  -3  -3  -9    5.26    4.98
  -3   3  -9    5.07    1.85
  -3  -3 -10   37.54    6.08
  -3  -3 -10   33.91    3.93
  -3   3 -10   33.27    4.05
   3   3  10   30.95   12.03
  -3   3 -10   32.92    4.32
   3  -3  10   26.56   11.30
  -3   3 -11  287.47   29.75
  -3   3 -11  322.03   29.76
   3  -3  11  222.32   32.36
  -3  -3 -11  286.78   30.26
   3   3  11  240.64   33.23
  -3  -3 -11  296.41   29.71
  -3  -3 -12  412.07   39.47
   3  -3  12  289.63   42.20
  -3   3 -12  369.17   39.49
  -3  -3 -12  374.45   40.00
  -3   3 -12  427.09   39.50
   3   3  12  323.52   42.74
  -3  -3 -13    6.76    5.93
   3  -3  13   -4.70   16.23
  -3   3 -13    6.77    2.38
  -3   3 -13    7.70    3.82
   3   3  13    8.07   17.08
  -3  -3 -13    2.65    2.37
  -3  -3 -14   94.53   12.96
   3  -3  14   77.42   20.89
  -3   3 -14  112.47   11.75
  -3  -3 -14  109.38   11.26
   3   3  14   68.68   22.00
  -3   3 -14  108.90   11.31
  -3   3 -15   22.35    5.15
  -3  -3 -15   20.06    3.57
   3   3  15   10.34   18.73
  -3  -3 -15   14.90    7.36
  -3   3 -15   17.68    3.55
   3  -3  15    0.91   17.54
  -3  -3 -16    4.01    7.42
   3   3  16   18.26   19.17
  -3   3 -16   -1.23    5.22
  -3  -3 -16    4.39    3.02
  -3   3 -16    5.39    3.01
  -3  -3 -17   -2.81    7.61
  -3  -3 -17    0.31    3.35
  -3   3 -17    5.42    3.15
  -3  -3 -18   74.93   12.80
  -3   3 -18   94.65   10.46
  -3  -3 -18  104.74   10.80
  -3  -3 -19   -9.68    8.28
  -3   3 -19   -0.66    3.50
  -3  -3 -19    1.39    3.70
  -3  -3 -20  135.55   18.70
  -3  -3 -20  169.77   16.94
  -3   3 -20  160.96   16.85
  -3   3 -21    7.95    4.02
  -3  -3 -21    7.45    4.13
  -3  -3 -21    6.05    9.10
  -3   3 -22   70.26    8.90
  -3  -3 -22   78.17    8.98
  -3  -3 -23    2.64    4.48
  -3   3 -23    7.50    4.49
  -3   3 -24   -1.76    4.63
   3   4 -24   11.26    9.31
  -3   4  24  -12.90   48.55
  -3  -4  24   52.65   42.70
   3   4 -23   15.84    8.61
  -3  -4  23   45.68   42.34
  -3  -4  22    2.01   40.01
  -3   4  22    9.88   42.41
   3   4 -22    0.87    3.80
   3   4 -22   -9.94    8.25
   3   4 -21    3.86    7.65
   3   4 -21    5.05    3.64
   3   4 -20   66.56   11.33
   3   4 -20   88.30    9.26
   3   4 -19   11.29    6.70
   3   4 -19   -1.04    2.85
   3   4 -18   60.52    9.67
   3   4 -18   71.17    7.69
   3   4 -17   23.90    3.86
   3   4 -16   14.25    3.12
   3   4 -15   33.94    4.40
   3   4 -14   59.62    6.56
   3   4 -13    7.80    2.17
   3   4 -12   23.34    3.08
   3   4 -11   63.04    6.65
  -3  -4  10   21.83   19.57
   3   4 -10   35.85    4.04
  -3   4   9  466.93   56.68
  -3  -4   9  470.34   56.46
   3   4  -9  532.98   52.60
  -3  -4   8  562.19   70.62
  -3   4   8  606.67   70.83
   3   4  -8  691.32   67.83
  -3  -4   7   -5.60   15.27
  -3   4   7  -12.95   14.11
   3   4  -7    1.20    1.33
  -3   4   6  172.74   21.78
  -3  -4   6  135.71   21.81
   3   4  -6  144.58   14.54
   3   4  -5    2.41    1.13
  -3  -4   5   -5.35   11.08
  -3   4   5   -0.70   10.08
   3   4  -4  200.19   19.30
  -3   4   4  176.23   21.17
   3   4  -4  153.93   21.68
  -3  -4   4  161.73   21.10
  -3   4   4  188.40   19.50
  -3   4   3  115.75   12.08
   3   4  -3  129.99   15.27
   3  -4  -3  144.81   14.50
  -3  -4   3   85.05   10.56
  -3   4   3  146.98   10.85
  -3  -4   3  110.91   11.91
  -3   4   2  740.59   83.71
  -3   4   2  901.34   83.69
  -3  -4   2  694.55   83.66
   3  -4  -2  649.94   83.87
   3   4  -2  674.99   83.83
   3   4  -2  875.22   83.44
  -3  -4   2  951.23   83.51
  -3   4   2  855.89   83.50
   3  -4  -2  919.21   83.59
   3   4  -1    8.25    1.94
   3   4  -1   10.80    5.17
  -3  -4   1    5.60    3.41
   3  -4  -1    7.76    2.39
  -3   4   1    9.63    3.17
   3  -4   0    0.94    3.09
   3  -4   0    0.82    1.75
   3   4   0   -0.97    3.98
  -3  -4   0   -2.26    2.79
  -3   4   0   -1.80    2.77
   3   4   1  184.36   18.17
   3  -4   1  175.65   18.09
  -3   4  -1  178.80   18.07
  -3  -4  -1  173.95   18.08
   3   4   1  181.16   18.71
   3   4   2   52.14    6.37
   3  -4   2   61.84    6.33
  -3  -4  -2   54.98    6.11
  -3   4  -2   55.12    6.14
   3  -4   2   50.69    6.29
   3  -4   3   79.48    8.46
   3  -4   3   72.36    8.31
  -3  -4  -3   71.79    9.21
   3   4   3   80.73    8.34
   3  -4   4  146.74   14.29
   3   4   4  124.66   14.19
  -3   4  -4  135.67   13.83
   3  -4   4  129.44   14.30
  -3   4  -4  150.46   14.12
  -3  -4  -4  134.53   14.84
  -3   4  -5    8.01    3.33
  -3   4  -5    6.18    1.64
  -3  -4  -5    8.52    4.89
  -3  -4  -6  398.71   41.43
  -3   4  -6  420.61   41.03
  -3   4  -6  406.72   40.90
   3  -4   7   59.33   12.08
  -3   4  -7   91.45    8.92
  -3   4  -7   86.25    9.43
   3   4   7   64.84   12.66
  -3  -4  -7   80.88   10.10
   3   4   8  852.29   92.90
  -3  -4  -8  967.22   92.11
   3  -4   8  785.38   92.66
  -3   4  -8 1004.09   91.73
  -3   4  -8  842.78   91.80
   3  -4   9   68.86   12.96
   3   4   9   72.88   13.81
  -3  -4  -9   88.91   10.39
  -3   4  -9   86.03    8.82
  -3  -4 -10   24.10    3.09
  -3   4 -10   23.04    3.13
   3   4  10   21.91   11.85
  -3  -4 -10   19.08    6.17
   3  -4  10   25.13   11.37
   3   4  11   50.58   15.75
   3  -4  11   68.53   14.95
  -3  -4 -11   82.49    8.29
  -3   4 -11   77.08    8.30
  -3  -4 -11   74.85   10.18
  -3   4 -12    9.02    3.22
  -3  -4 -12    6.03    2.33
  -3  -4 -12   14.34    6.18
   3   4  12    8.84   14.01
  -3   4 -12    8.46    2.42
   3  -4  12   26.46   13.94
  -3  -4 -13   -1.23    6.42
   3   4  13  -16.65   16.73
   3  -4  13    1.16   14.71
  -3   4 -13    0.62    3.42
  -3  -4 -13   -1.94    2.39
  -3   4 -13   -1.13    2.45
   3   4  14   84.97   22.01
   3  -4  14   93.90   21.15
  -3  -4 -14  130.95   13.46
  -3   4 -14  124.89   13.73
  -3   4 -14  137.36   13.50
  -3  -4 -14  127.45   15.25
  -3  -4 -15   12.92    7.60
   3   4  15   13.71   19.29
   3  -4  15   16.90   17.80
  -3  -4 -15    7.14    2.98
  -3   4 -15    6.13    4.57
  -3   4 -15    5.70    2.97
  -3  -4 -16   -0.32    7.62
  -3   4 -16   -4.09    4.80
  -3   4 -16    2.14    3.07
   3   4  16   16.66   19.11
   3  -4  16   20.25   17.31
  -3  -4 -16    2.06    3.02
  -3  -4 -17  163.33   16.01
  -3   4 -17  159.97   16.05
  -3  -4 -17  128.36   17.71
  -3   4 -17  142.77   16.42
  -3  -4 -18   34.56    4.83
  -3   4 -18   31.22    4.77
  -3  -4 -18   18.90    8.81
  -3   4 -18   31.35    6.49
  -3  -4 -19    4.07    8.79
  -3   4 -19    1.37    3.62
  -3  -4 -20   46.22   10.70
  -3   4 -20   51.04    6.71
  -3   4 -21   -0.50    3.94
  -3  -4 -21    4.90    9.33
  -3   4 -22    1.04    4.22
  -3   4 -23    5.43    4.40
  -3   4 -24    7.68    4.85
  -3   5  24  -48.01   46.08
  -3  -5  24   10.37   41.96
  -3   5  23  -13.21   45.57
   3   5 -23   11.09    8.56
  -3  -5  23   29.08   41.09
   3   5 -22   35.75    9.57
  -3  -5  22   31.83   39.73
  -3   5  22    9.54   41.89
   3   5 -22   45.44    5.97
  -3  -5  21   36.27   37.88
  -3   5  21    1.02   40.91
   3   5 -21   27.38    8.67
   3   5 -21   33.68    4.93
   3   5 -20    3.64    7.52
   3   5 -20   -0.29    3.39
   3   5 -19   16.31    3.83
   3   5 -18   13.56    3.32
   3   5 -17   11.46    3.19
   3   5 -16    3.18    2.76
   3   5 -15  244.21   24.64
   3   5 -14   15.19    2.94
   3   5 -13    2.92    2.11
   3   5 -12   91.21    9.48
   3   5 -11   83.53    8.65
  -3  -5  11  101.83   23.08
  -3  -5  10  206.25   30.80
  -3   5  10  242.98   30.50
   3   5 -10  229.75   23.02
   3   5  -9   24.33    3.01
  -3   5   9    6.30   16.27
  -3  -5   9   19.18   16.79
  -3  -5   8   76.59   17.87
   3   5  -8   84.53    8.62
  -3   5   8   57.21   18.35
   3   5  -7  165.11   16.44
  -3   5   7  131.43   22.87
  -3  -5   7  134.92   23.04
   3   5  -6  122.90   12.45
  -3   5   6  125.67   19.64
  -3  -5   6  127.04   19.94
  -3   5   5  468.64   55.38
   3   5  -5  554.63   53.95
  -3  -5   5  484.41   55.40
  -3  -5   4   21.24    2.76
  -3   5   4    8.23    6.91
  -3  -5   4    9.08    6.33
  -3   5   4   21.43    3.30
  -3  -5   3  154.49   14.58
  -3  -5   3  118.26   15.33
   3   5  -3  107.15   16.87
  -3   5   3  153.17   14.65
  -3   5   3  117.72   15.48
  -3  -5   2   64.88    7.10
  -3   5   2   64.39    6.86
  -3   5   2   57.47    7.67
   3   5  -2   47.63    9.04
   3   5  -2   69.09    6.71
  -3  -5   2   53.71    7.51
   3  -5  -1  298.86   30.99
   3   5  -1  263.40   31.11
  -3  -5   1  290.05   30.85
  -3   5   1  322.18   30.91
   3   5  -1  335.06   30.78
   3   5   0   20.57    4.35
   3   5   0   20.30    3.01
   3  -5   0   20.14    4.25
  -3  -5   0   20.61    6.75
  -3   5   0   24.78    3.39
  -3  -5   0   16.52    3.31
  -3  -5  -1  597.08   57.12
   3  -5   1  540.66   57.23
   3   5   1  560.16   57.18
  -3   5  -1  581.92   57.13
  -3   5  -2  229.92   21.16
  -3  -5  -2  209.17   20.85
   3   5   2  200.62   20.93
  -3   5  -2  196.11   20.86
   3  -5   2  209.92   21.13
   3   5   3   12.95    3.64
   3  -5   3   17.53    4.38
   3  -5   3   27.23    3.57
  -3   5  -3   16.44    2.48
  -3  -5  -3   13.88    5.74
   3  -5   4   89.34    9.12
   3   5   4   73.53    9.09
  -3   5  -4   84.69    8.59
   3  -5   4   91.77    9.65
  -3  -5  -4   69.84   10.31
  -3   5  -5  101.27   10.63
  -3  -5  -5   98.59   12.10
  -3   5  -5  114.25   11.29
  -3  -5  -6  779.49   80.62
  -3   5  -6  821.22   80.12
   3  -5   6  684.04   80.79
   3   5   6  663.65   80.93
  -3   5  -6  898.57   80.30
   3   5   7    3.27    8.50
  -3   5  -7    7.04    1.94
  -3   5  -7    4.46    4.22
   3  -5   7    3.56    7.77
  -3  -5  -7    0.74    5.84
   3   5   8   -7.03    9.53
  -3   5  -8   -2.67    1.75
   3  -5   8    3.71    8.40
  -3   5  -8   -1.88    4.16
  -3  -5  -8   -4.51    5.88
   3   5   9   43.98   11.99
  -3   5  -9   53.57    5.41
  -3   5  -9   42.69    6.67
   3  -5   9   33.93   10.95
  -3  -5  -9   38.39    7.39
  -3   5 -10   10.94    2.32
   3  -5  10   18.90   10.80
  -3   5 -10    1.82    4.96
  -3  -5 -10   17.78    6.27
   3  -5  11  384.14   50.19
   3   5  11  443.02   50.77
  -3   5 -11  383.90   48.23
  -3  -5 -11  500.49   48.67
  -3   5 -11  558.37   48.07
  -3  -5 -12   77.61   11.74
   3  -5  12   75.96   16.70
   3   5  12   88.54   18.10
  -3   5 -12   90.80    9.35
  -3  -5 -13    2.61    7.75
   3   5  13   -9.74   16.40
  -3   5 -13   -1.08    2.52
   3  -5  13    2.27   14.70
   3  -5  14   12.57   16.37
  -3   5 -14   24.69    3.72
  -3  -5 -14   14.32    8.17
  -3   5 -14   18.99    4.63
   3   5  14   28.18   17.48
  -3  -5 -15    8.75    8.13
  -3   5 -15    0.23    4.28
   3   5  15    9.69   18.38
   3  -5  15   -5.19   16.73
  -3   5 -15    2.47    2.90
  -3  -5 -16   44.18    9.74
  -3   5 -16   41.67    6.37
  -3   5 -16   41.03    5.36
  -3   5 -17   85.94   10.68
  -3  -5 -17   92.01   13.00
  -3   5 -17   96.82   10.11
  -3  -5 -18    2.31    8.76
  -3   5 -18    9.50    3.55
  -3  -5 -19   20.73    9.36
  -3   5 -19   13.61    4.11
  -3  -5 -20   44.36   11.30
  -3   5 -20   55.03    6.97
  -3   5 -21  108.77   11.48
  -3  -5 -21   77.07   14.74
  -3   5 -22    1.88    4.48
  -3  -5 -22   -1.83   10.80
  -3   5 -23    2.36    4.52
  -3  -6  23  -27.90   38.46
  -3   6  23   12.70   44.01
   3   6 -23    5.30    8.65
   3   6 -22   -1.99    8.67
  -3  -6  22    7.41   36.97
  -3   6  22   -4.06   40.46
   3   6 -22   28.88    4.37
  -3   6  21  -28.17   38.48
  -3  -6  21  -12.45   35.11
   3   6 -21   -4.46    7.92
   3   6 -21    6.79    3.84
  -3  -6  20   18.73   34.25
  -3   6  20   36.08   37.09
   3   6 -20   14.54    3.92
   3   6 -19  178.16   18.14
  -3   6  19  164.40   40.86
  -3   6  18    0.83   34.62
  -3  -6  18    7.75   31.45
   3   6 -18   14.27    3.58
  -3  -6  17   -0.73   29.14
   3   6 -17    0.42    2.95
   3   6 -16   19.74    3.41
   3   6 -15  338.94   34.05
  -3  -6  14   36.81   27.24
   3   6 -14   75.64    8.08
  -3  -6  13   26.69   24.65
  -3   6  13   49.72   25.62
   3   6 -13   35.95    4.52
   3   6 -12   16.50    2.77
  -3   6  12   23.74   22.80
  -3  -6  12   11.67   21.44
  -3  -6  11   20.20   19.99
   3   6 -11    6.50    2.01
  -3   6  11   29.58   20.09
  -3   6  10   66.85   20.59
  -3  -6  10   92.60   20.31
   3   6 -10   95.83    9.80
  -3  -6   9   98.79   19.09
  -3   6   9   93.49   19.77
   3   6  -9  105.58   10.75
  -3  -6   8   16.44   15.85
   3   6  -8    9.87    1.99
  -3   6   8    9.34   14.13
  -3   6   7    1.34   14.29
  -3  -6   7   11.54   16.62
   3   6  -7    2.88    1.78
  -3  -6   6   -0.74   11.95
  -3   6   6    3.96   11.80
   3   6  -6    2.06    1.73
  -3  -6   5   -4.24    8.75
  -3   6   5   13.80    8.36
   3   6  -5    6.98    2.00
  -3   6   5    6.92    2.77
  -3   6   4   12.71    6.06
  -3  -6   4    6.15    6.41
  -3   6   4   17.31    3.03
   3  -6  -3   45.71    6.88
  -3   6   3   52.14    5.48
   3   6  -3   33.90    9.00
  -3   6   3   43.58    6.85
  -3  -6   3   41.50    6.80
   3   6  -2  221.64   19.89
  -3   6   2  179.80   20.15
   3  -6  -2  244.34   21.74
   3  -6  -2  187.47   20.32
  -3  -6   2  171.53   20.10
   3   6  -2  183.45   21.47
   3   6  -1  354.88   41.56
  -3   6   1  426.62   41.36
   3   6  -1  464.24   41.31
  -3  -6   1  407.24   42.44
   3  -6  -1  370.29   41.59
  -3  -6   1  391.10   41.30
   3  -6  -1  445.79   41.62
   3  -6   0  223.96   21.57
   3   6   0  215.28   21.44
  -3  -6   0  204.52   21.09
  -3   6   0  223.42   21.13
   3  -6   0  191.48   21.36
   3   6   0  204.53   21.11
  -3  -6   0  192.44   22.71
   3  -6   1  658.53   69.13
  -3  -6  -1  749.50   69.07
   3   6   1  692.90   69.16
   3  -6   1  644.94   69.29
  -3   6  -1  691.17   69.06
   3  -6   2  152.62   16.07
   3   6   2  161.45   16.18
   3  -6   2  164.23   16.70
  -3   6  -2  157.88   16.02
   3  -6   3  147.98   16.64
   3   6   3  150.74   16.19
  -3   6  -3  157.19   15.97
  -3   6  -3  181.95   16.68
  -3   6  -4   32.20    3.86
   3  -6   4   35.91    6.23
   3   6   4   27.65    4.67
  -3  -6  -4   37.85    7.41
  -3  -6  -5   41.87    8.74
   3  -6   5   54.31    8.37
  -3   6  -5   53.33    5.75
  -3   6  -6  145.74   13.72
   3  -6   6   98.00   15.61
   3   6   6  101.27   15.84
  -3  -6  -6  127.20   15.38
   3   6   7   72.97   13.53
  -3   6  -7   97.61   10.18
  -3  -6  -7   94.71   11.86
  -3   6  -7  118.30   11.23
   3  -6   7   85.33   12.76
   3   6   8   40.43   11.17
  -3   6  -8   53.56    5.61
   3  -6   8   39.24   10.57
  -3  -6  -8   48.11    8.05
  -3   6  -8   46.80    7.01
   3  -6   9   50.49   10.84
  -3  -6  -9   41.23    8.60
  -3   6  -9   46.36    7.08
   3   6   9   47.61   12.01
  -3   6  -9   51.98    5.56
   3  -6  10    4.31   10.28
   3   6  10   -3.03   12.03
  -3   6 -10   12.07    2.41
  -3  -6 -10    3.22    6.87
   3   6  11   77.83   17.16
  -3   6 -11   92.98    9.58
   3  -6  11   68.81   15.63
  -3  -6 -11   90.88   11.79
  -3   6 -12   24.96    3.58
   3  -6  12    4.78   13.51
   3   6  12   30.78   15.66
  -3  -6 -12   12.49    8.32
   3   6  13   33.19   16.50
   3  -6  13   15.45   15.22
  -3  -6 -13   20.79    8.53
  -3   6 -13   20.32    3.64
   3   6  14    5.34   18.45
  -3   6 -14   21.32    3.76
   3  -6  14   19.73   15.38
  -3  -6 -14   27.55    8.56
  -3   6 -15   66.20    7.14
   3   6  15   38.44   19.48
   3  -6  15   43.74   17.39
  -3  -6 -15   47.18   10.72
  -3  -6 -16   -0.39    8.96
  -3   6 -16    3.74    4.57
  -3   6 -16    6.00    3.23
  -3   6 -17  108.65   11.07
  -3   6 -17   95.74   11.48
  -3  -6 -17   94.81   13.90
  -3  -6 -18    7.95    9.45
  -3   6 -18   11.43    3.74
  -3  -6 -19    0.87    9.43
  -3   6 -19    1.41    3.75
  -3   6 -20   28.48    5.04
  -3  -6 -20   21.78   10.81
  -3   6 -21    0.53    4.24
  -3  -6 -21   -4.73   10.79
  -3   6 -22   14.27    4.79
  -3  -6 -22    4.69   11.19
  -3   6 -23    8.45    4.79
  -3   7  23   58.07   42.44
  -3  -7  23   43.94   37.10
   3   7 -23    2.32    8.92
   3   7 -22   12.85    8.45
  -3  -7  22   34.78   35.83
  -3   7  22   -0.97   39.62
  -3   7  21   62.31   37.83
   3   7 -21   64.66    7.88
  -3  -7  21   67.98   36.14
  -3   7  20   -0.87   35.19
  -3  -7  20   15.42   32.39
   3   7 -20   17.45    4.15
  -3  -7  19   -6.95   31.55
  -3   7  19   45.98   33.32
   3   7 -19    5.21    3.45
   3   7 -18   -3.19    3.20
  -3   7  18   -9.28   31.10
  -3  -7  17   33.23   28.98
   3   7 -17   41.96    5.43
  -3   7  17   36.13   31.05
  -3  -7  16   22.77   26.86
  -3   7  16   17.48   27.98
   3   7 -16   30.41    4.45
  -3  -7  15   94.73   29.15
   3   7 -15  112.82   11.67
  -3   7  15   46.60   28.97
  -3   7  14   15.98   25.05
  -3  -7  14   -0.56   24.87
   3   7 -14    6.04    2.83
  -3  -7  13   48.15   23.91
  -3   7  13   58.18   24.52
   3   7 -13   71.03    7.67
  -3   7  12    8.89   20.44
  -3  -7  12   15.20   20.83
   3   7 -12    0.80    2.27
  -3   7  11   11.40   18.97
   3   7 -11    3.05    2.15
  -3  -7  11   11.29   18.67
  -3  -7  10  158.12   24.87
   3   7 -10  170.59   17.12
  -3   7  10  131.68   25.14
   3   7  -9    1.89    1.95
  -3  -7   9    1.86   17.04
  -3   7   9   -3.85   14.64
   3   7  -8  122.51   12.44
  -3   7   8  101.97   20.19
  -3  -7   8  123.32   21.88
   3   7  -7    8.22    2.13
  -3  -7   7   25.48   12.90
  -3   7   7   -1.44   13.34
  -3   7   6  267.54   31.21
   3   7  -6  358.25   31.13
  -3  -7   6  272.67   32.85
  -3   7   6  253.56   32.91
   3  -7  -5  346.67   31.39
  -3   7   5  269.42   31.58
  -3  -7   5  261.14   31.67
  -3   7   5  316.47   30.80
  -3   7   4    0.63    5.32
  -3  -7   4   -9.00    5.55
  -3   7   4    0.07    2.48
   3  -7  -3   43.44    6.77
  -3   7   3   37.37    6.12
  -3  -7   3   33.98    6.00
  -3   7   3   45.80    5.13
  -3   7   2  427.94   43.38
   3   7  -2  375.09   44.00
   3  -7  -2  367.67   43.99
  -3  -7   2  395.04   43.33
   3   7  -2  522.60   43.36
   3  -7  -2  433.82   43.72
  -3   7   1  109.12   11.48
  -3  -7   1  112.69   11.41
   3  -7  -1  107.35   12.40
  -3  -7   1  114.40   14.69
   3  -7  -1   84.16   12.52
   3   7  -1   88.59   12.28
   3   7  -1  125.12   11.45
  -3  -7   0  193.14   20.41
   3   7   0  170.13   18.51
  -3  -7   0  186.77   18.14
   3  -7   0  147.55   18.51
   3   7   0  179.48   18.22
  -3   7   0  195.96   18.16
   3  -7   0  161.36   18.87
   3  -7   1  580.71   64.60
  -3  -7  -1  714.31   64.51
   3   7   1  647.19   64.61
   3   7   1  580.58   64.59
  -3  -7  -1  749.55   65.55
   3  -7   1  666.56   64.96
  -3   7  -1  654.93   64.51
   3  -7   2   25.11    4.31
   3   7   2   29.37    4.25
   3  -7   2   29.18    6.43
   3  -7   3   83.32    8.51
   3   7   3   69.40    8.46
   3  -7   3   82.31    9.62
   3   7   4  147.45   17.06
  -3  -7  -4  138.98   18.32
  -3   7  -4  182.63   16.93
   3  -7   4  180.14   17.88
  -3   7  -5  451.78   40.74
  -3  -7  -5  372.53   41.60
   3  -7   5  432.17   41.50
   3   7   5  364.44   41.51
   3  -7   5  321.40   41.33
   3  -7   6   95.03   14.70
  -3  -7  -6  110.85   14.83
  -3   7  -6  136.65   12.88
   3   7   6  104.99   14.98
   3   7   7   35.08   10.13
  -3  -7  -7   50.61    8.74
   3  -7   7   37.46    8.82
  -3   7  -7   53.59    5.67
   3  -7   8   -2.08    7.89
  -3   7  -8   13.74    2.52
  -3  -7  -8   12.32    7.41
   3   7   8    5.83    9.68
  -3   7  -9    0.07    2.19
   3  -7   9   -0.71    9.34
   3   7   9   -6.39   10.71
  -3  -7  -9   -0.34    7.40
   3  -7  10  113.23   20.41
   3   7  10  107.12   20.84
  -3  -7 -10  150.18   18.21
  -3   7 -10  174.17   16.56
  -3  -7 -11  152.43   19.14
  -3   7 -11  177.75   17.21
   3  -7  11  130.38   21.73
   3   7  11  129.53   22.51
  -3   7 -12   14.49    3.12
   3   7  12    2.98   15.18
   3  -7  12   11.96   13.40
  -3  -7 -12   17.93    8.42
   3   7  13   -9.23   16.41
  -3  -7 -13   15.98    8.80
   3  -7  13    0.71   14.35
  -3   7 -13    1.70    2.84
  -3   7 -14   20.14    3.65
   3  -7  14    0.76   15.07
  -3  -7 -14   12.63    9.60
   3   7  14    8.17   16.88
  -3   7 -15   57.81    6.98
  -3  -7 -15   72.10   11.38
  -3  -7 -16   76.12   12.54
  -3   7 -16   70.12    8.09
  -3   7 -17   52.53    6.72
  -3  -7 -17   65.08   11.36
  -3   7 -18    4.28    3.51
  -3  -7 -18   -1.60   10.05
  -3   7 -19   22.81    4.45
  -3  -7 -19    8.06   10.46
  -3  -7 -20   10.56   11.30
  -3   7 -20    2.17    4.01
  -3   7 -21   89.15    9.97
  -3  -7 -21   65.71   14.10
  -3  -7 -22   -5.27   11.48
  -3   7 -22    6.72    4.61
   3  -8 -22   11.39   10.65
  -3   8  22   18.37   37.57
  -3  -8  22  -25.05   35.41
  -3   8  21  -52.81   36.51
   3   8 -21   14.41    3.72
  -3  -8  21  -12.30   33.76
   3   8 -20   26.23    4.64
  -3  -8  20   -2.35   33.09
  -3   8  20  -10.55   33.89
   3   8 -19  108.58   11.59
  -3   8  19   66.57   33.59
  -3  -8  19   81.76   32.55
   3   8 -18    9.52    3.57
  -3  -8  18   11.85   29.59
  -3   8  18  -14.95   30.12
  -3   8  17  -15.92   27.36
  -3  -8  17    6.56   27.49
   3   8 -17   -1.85    3.22
  -3  -8  16   -4.92   25.62
   3   8 -16   -2.56    3.19
  -3   8  15   39.87   25.38
  -3  -8  15   79.42   27.05
   3   8 -15   98.44   10.34
  -3   8  14   37.92   23.72
   3   8 -14   69.13    7.58
  -3  -8  14   27.15   24.77
  -3  -8  13    6.88   23.08
  -3   8  13   11.85   21.27
   3   8 -13   13.66    3.13
   3   8 -12   78.64    8.41
  -3   8  12   54.52   21.84
  -3  -8  12   71.80   23.09
  -3  -8  11   -8.84   20.23
   3   8 -11   38.16    4.58
  -3   8  11    6.29   17.77
  -3   8  10   12.19   16.28
   3   8 -10    9.93    2.66
  -3  -8  10   18.13   19.08
   3   8  -9   23.88    3.48
  -3   8   9   36.04   16.52
   3  -8  -9   21.96    7.14
   3  -8  -8   39.50    7.77
   3   8  -8   38.92    4.59
  -3   8   8   25.75   15.26
  -3  -8   8   18.16   15.78
   3  -8  -7    2.57    6.03
  -3   8   7    4.49    3.05
   3   8  -7    9.27    2.27
  -3   8   7    4.58   10.36
  -3  -8   7   13.89   11.08
  -3   8   6  223.16   30.24
  -3  -8   6  240.77   30.35
   3  -8  -6  288.78   29.83
  -3   8   6  252.07   29.17
   3  -8  -5    4.60    5.50
  -3   8   5    5.38    5.86
  -3  -8   5    3.05    5.99
  -3   8   5   -2.82    2.74
   3  -8  -4  434.13   41.61
  -3  -8   4  386.28   41.32
  -3   8   4  435.30   41.13
  -3   8   4  379.26   41.34
  -3   8   3  330.05   33.28
  -3  -8   3  320.86   33.23
   3  -8  -3  350.85   33.78
  -3  -8   2  156.98   17.29
   3   8  -2  116.88   18.08
   3  -8  -2  182.84   18.34
  -3   8   2  169.56   17.36
   3   8  -2  203.44   17.37
   3   8  -1  558.81   52.28
   3  -8  -1  486.90   52.85
  -3  -8   1  527.91   52.13
   3  -8  -1  526.79   52.70
  -3  -8   1  555.98   53.73
   3   8  -1  435.92   52.59
  -3   8   1  528.25   52.15
   3   8   0    5.38    4.04
  -3  -8   0    7.02    2.34
  -3   8   0    7.70    2.27
   3  -8   0   10.46    4.41
  -3  -8   0   -1.54    8.88
   3   8   0    5.67    2.67
   3  -8   0   14.55    5.89
   3   8   1  155.52   16.05
  -3   8  -1  157.76   15.72
   3  -8   1  137.10   16.06
  -3  -8  -1  209.77   18.40
   3  -8   1  169.37   17.01
   3   8   1  152.82   15.94
   3   8   2  189.63   21.12
   3  -8   2  233.03   22.02
   3   8   2  220.54   21.15
   3  -8   2  207.21   21.15
   3  -8   3   11.68    3.39
   3   8   3   12.62    3.36
   3  -8   3   14.32    6.33
   3   8   4   61.93    7.48
   3  -8   4   71.60    7.59
   3   8   4   48.54    9.03
   3  -8   4   55.24    8.82
  -3   8  -4   70.89    7.25
   3  -8   4   77.17    9.88
  -3   8  -5  231.39   21.25
   3  -8   5  226.83   22.65
   3  -8   5  168.03   22.12
   3   8   5  176.57   22.33
  -3  -8  -5  196.75   22.70
   3   8   6    0.70    7.37
  -3   8  -6   -0.51    2.32
  -3  -8  -6    7.74    7.81
   3  -8   6    0.79    6.65
  -3   8  -7   36.43    4.27
  -3  -8  -7   34.07    8.55
   3   8   7   30.07    9.21
   3  -8   7   14.61    8.14
  -3   8  -8    9.84    2.65
   3  -8   8    2.49    9.05
   3   8   8   18.36   10.27
  -3  -8  -8   15.38    8.04
  -3   8  -9    1.74    2.48
   3  -8   9   -2.89   10.09
  -3  -8  -9   -2.28    7.84
   3   8   9    2.94   11.21
   3   8  10   37.79   13.48
   3  -8  10   60.63   12.54
  -3   8 -10   55.96    6.40
  -3  -8 -10   56.58   10.08
  -3  -8 -11    6.28    8.08
   3   8  11    8.21   13.28
  -3   8 -11    0.08    2.76
   3  -8  11   10.99   11.77
  -3   8 -12   20.23    3.54
   3   8  12   10.65   14.72
  -3  -8 -12   -0.20    9.43
   3  -8  12   14.12   13.47
  -3   8 -13    9.07    3.11
  -3  -8 -13    9.31    8.93
   3   8  13   13.77   15.25
   3  -8  13    3.11   13.93
  -3   8 -14   11.69    3.41
  -3  -8 -14   17.05    9.69
  -3   8 -15  138.25   14.14
  -3  -8 -15  115.99   16.91
  -3  -8 -16   64.17   12.79
  -3   8 -16   72.04    8.17
  -3  -8 -17   26.26   10.99
  -3   8 -17   24.27    4.61
  -3   8 -18   -3.83    3.81
  -3  -8 -18    6.11   11.07
  -3   8 -19   -2.22    3.85
  -3  -8 -19    8.33   11.10
  -3  -8 -20   40.97   12.21
  -3   8 -20   41.82    6.24
  -3   8 -21   11.68    4.58
  -3  -8 -21    7.53   12.14
  -3   8 -22    1.32    4.62
  -3  -8 -22    5.56   12.35
   3  -9 -22  -13.06   11.62
  -3   9  22   11.46   36.97
  -3  -9  22  -29.78   36.11
  -3  -9  21   93.61   33.77
   3  -9 -21   59.36   12.91
   3  -9 -20   45.19   12.67
  -3   9  20   65.84   31.98
   3   9 -20   66.62    7.80
  -3  -9  20   59.40   32.74
  -3   9  19   19.40   29.91
   3   9 -19    1.69    3.68
  -3  -9  19  -21.40   29.15
   3  -9 -19   -2.56   10.22
   3  -9 -18   -0.50    9.88
  -3   9  18   14.60   27.25
   3   9 -18   -2.37    3.71
  -3  -9  18  -39.02   28.92
   3  -9 -17   34.74   11.70
   3   9 -17   63.59    7.15
  -3  -9  17   59.97   27.77
  -3   9  17   54.79   26.74
   3   9 -16   46.61    5.76
  -3  -9  16   -5.89   24.97
  -3   9  16   31.56   24.91
   3  -9 -16   34.97   10.33
   3  -9 -15   34.03    9.93
   3   9 -15   40.46    5.14
  -3   9  15   18.38   22.45
  -3  -9  15   55.16   24.94
  -3  -9  14   15.45   23.32
   3  -9 -14   43.47   10.50
  -3   9  14   53.58   22.17
   3   9 -14   60.74    6.71
  -3   9  13   13.07   20.17
   3  -9 -13   32.16    9.40
  -3  -9  13   41.61   21.90
   3   9 -13   39.10    4.91
  -3  -9  12    9.99   22.05
  -3   9  12    8.65   18.75
   3   9 -12   33.17    4.47
   3   9 -11   24.78    3.79
  -3  -9  11   18.84   22.53
  -3   9  11    3.59   19.60
   3   9 -10   94.56    9.97
  -3   9  10   71.92   20.96
  -3  -9  10   98.04   21.74
   3   9  -9   26.33    3.87
  -3   9   9   29.96   16.23
  -3  -9   9   24.46   16.91
   3  -9  -9   28.26    7.91
   3  -9  -8  113.99   13.27
  -3   9   8   75.93   11.28
  -3   9   8   80.54   16.07
   3   9  -8  134.63   11.18
  -3  -9   8   86.68   16.62
   3   9  -7    1.32    2.64
  -3   9   7    3.38    3.09
  -3  -9   7    0.38    9.34
   3  -9  -7   -3.08    6.31
  -3   9   7   -2.49    8.61
   3  -9  -6    5.17    6.12
  -3   9   6    3.19    2.97
  -3   9   6    4.77    6.54
  -3  -9   6    3.74    7.04
  -3   9   5  181.96   22.66
  -3  -9   5  206.25   22.76
   3  -9  -5  250.59   23.25
  -3   9   5  235.11   22.26
  -3   9   4   39.95    6.38
  -3   9   4   47.21    5.61
  -3  -9   4   42.27    6.36
   3  -9  -4   52.33    7.78
  -3  -9   3    5.78    3.11
   3  -9  -3    9.17    6.07
  -3   9   3    1.71    3.18
  -3   9   2  247.03   23.88
  -3  -9   2  229.79   23.81
   3  -9  -2  234.59   24.80
  -3  -9   1  362.45   34.76
   3  -9  -1  349.11   33.31
   3  -9  -1  230.03   32.85
  -3  -9   1  355.91   32.39
   3   9  -1  381.07   32.66
  -3   9   1  333.09   32.40
   3   9  -1  220.81   32.69
  -3  -9   0  117.51   15.11
   3  -9   0   86.67   11.81
  -3   9   0  108.02   10.87
  -3  -9   0  122.10   10.86
   3  -9   0  103.21   12.65
   3   9   0   66.95   11.47
   3   9   0  106.11   11.23
   3  -9   1  124.08   13.78
  -3  -9  -1  152.13   16.72
   3   9   1  128.31   13.72
   3  -9   1  147.40   15.14
   3   9   1  132.57   13.61
   3   9   2  155.47   16.70
  -3  -9  -2  179.49   19.03
   3   9   2  169.50   16.70
   3  -9   2  156.50   16.70
   3  -9   2  178.16   17.92
   3  -9   3   -1.23    4.71
   3   9   3   13.52    5.00
   3   9   3   12.03    3.26
   3   9   3   10.18    3.08
   3  -9   3   11.72    3.33
   3  -9   3   14.68    7.10
   3   9   4   50.37    6.75
   3  -9   4   60.70    6.89
   3   9   4   42.71    8.29
   3  -9   4   75.22   10.17
  -3   9  -4   67.28    6.68
   3  -9   4   52.90    8.14
  -3   9  -5  377.43   30.91
   3  -9   5  341.97   32.38
   3  -9   5  229.47   31.37
  -3  -9  -5  288.15   32.11
   3   9   5  234.90   31.45
   3   9   6    2.47    7.25
  -3  -9  -6    9.25    8.58
   3  -9   6   -0.15    6.74
  -3   9  -6    4.45    2.61
  -3   9  -7   29.36    4.08
   3  -9   7   16.32    8.50
  -3  -9  -7   27.41    8.98
   3   9   7   19.45    9.13
  -3   9  -8   -0.50    2.78
   3   9   8   -0.23    9.60
   3  -9   8   13.77    9.74
  -3  -9  -8    9.92    9.01
   3   9   9   30.62   12.10
   3  -9   9   38.02   11.67
  -3   9  -9   47.24    5.47
  -3  -9  -9   31.73   10.36
   3  -9  10  101.89   17.14
  -3   9 -10  132.52   13.04
   3   9  10   84.76   18.10
  -3  -9 -10  115.65   16.30
   3   9  11   85.10   19.76
   3  -9  11   94.78   19.24
  -3  -9 -11  127.29   17.92
  -3  -9 -12    6.48   10.08
  -3   9 -12   14.29    3.49
   3   9  12    8.66   13.04
   3  -9  12    6.18   12.86
  -3  -9 -13   13.89   10.06
  -3   9 -13    8.48    3.31
  -3   9 -14   15.31    3.56
  -3  -9 -14    6.75    9.75
  -3   9 -15   13.64    3.74
  -3  -9 -15   20.77   10.21
  -3   9 -16   61.33    7.29
  -3  -9 -16   50.64   11.99
  -3  -9 -17    8.10   11.09
  -3   9 -17    7.62    3.94
  -3   9 -18    6.40    4.02
  -3  -9 -18    7.05   10.62
  -3   9 -19   17.59    4.76
  -3  -9 -19   22.85   11.25
  -3   9 -20   15.33    4.72
  -3  -9 -20   16.88   12.01
  -3   9 -21   11.80    4.62
  -3  -9 -21   -9.40   12.63
   3 -10 -21   -4.44   11.15
  -3  10  21   39.80   34.00
  -3 -10  21   28.87   32.86
   3 -10 -20    3.80   10.74
  -3  10  20   20.43   30.50
  -3 -10  20    4.57   32.17
   3 -10 -19   33.44   11.70
  -3 -10  19   19.41   30.64
  -3  10  19   20.45   29.27
   3  10 -19   43.66    6.04
   3 -10 -18    2.58   10.04
  -3 -10  18   10.55   27.11
  -3  10  18  -27.25   27.75
   3  10 -18   -2.24    3.65
   3 -10 -17   16.75   10.92
  -3  10  17   52.12   25.85
  -3 -10  17   22.74   27.02
   3  10 -17   45.55    5.80
   3 -10 -16    1.21    9.68
   3  10 -16   10.71    3.62
  -3  10  16    1.65   23.36
  -3 -10  16  -22.89   24.67
   3 -10 -15    1.88    9.05
   3  10 -15   -0.09    3.26
  -3 -10  15   10.02   24.30
  -3  10  15  -18.09   21.17
   3 -10 -14  104.99   16.69
   3  10 -14  146.04   14.19
  -3 -10  14  130.30   27.37
  -3 -10  13    1.03   22.53
   3 -10 -13    7.00    8.44
  -3  10  13   15.25   19.86
   3  10 -13   10.35    3.30
   3  10 -12   72.35    8.12
  -3 -10  12   59.28   22.71
  -3  10  12   95.27   21.41
   3  10 -11   -0.08    3.02
  -3  10  11    6.78   19.50
   3  10 -10   10.57    3.31
  -3 -10  10  -12.82   16.75
   3 -10 -10    4.53    8.16
  -3  10  10    2.58   15.84
   3 -10  -9   54.04   10.20
  -3 -10   9   65.65   14.96
   3  10  -9   74.72    6.95
  -3  10   9   45.72    7.07
  -3  10   9   24.19   13.30
   3 -10  -8    5.72    7.87
  -3  10   8    1.37    3.38
  -3 -10   8    0.61   10.58
  -3  10   8   -3.01    9.72
   3  10  -8   -3.62    2.82
   3 -10  -7   93.70   12.27
  -3  10   7   68.61   12.07
  -3 -10   7   67.76   12.40
  -3  10   7   79.08    9.99
   3  10  -7  117.36   10.02
   3 -10  -6   43.58    8.43
  -3  10   6   29.25    7.15
  -3 -10   6   24.08    7.37
  -3  10   6   37.99    4.94
  -3 -10   5   32.00    6.30
   3 -10  -5   26.82    7.19
  -3  10   5   34.42    6.16
  -3  10   5   41.16    4.87
   3  10  -5   28.72    6.27
   3 -10  -5   34.70    8.25
  -3 -10   4  229.51   24.32
  -3  10   4  229.80   24.34
   3 -10  -4  306.58   25.56
  -3 -10   3  200.11   20.77
  -3  10   3  211.35   20.82
   3 -10  -3  207.39   21.99
  -3 -10   2    1.94   11.48
  -3  10   2   -0.19    2.31
  -3 -10   2    0.20    2.11
   3 -10  -2   -0.80    6.77
  -3 -10   1    4.33    1.78
  -3  10   1    4.01    1.92
  -3 -10   1   -2.74   11.08
   3  10  -1    4.28    3.05
   3 -10  -1   -3.41    6.95
   3  10   0    2.33    2.83
   3 -10   0   -0.90    5.15
   3  10   0   -3.57    4.62
   3 -10   0    2.99    6.69
  -3 -10   0    2.17   10.52
   3  10   1   41.42    5.89
   3 -10   1   56.65    8.55
   3 -10   1   40.80    6.12
   3  10   1   51.47    5.71
  -3 -10  -1   64.50   11.66
   3  10   2    2.05    4.16
   3 -10   2   -0.35    3.96
   3  10   2    0.49    3.26
   3 -10   2   -0.33    7.41
   3 -10   2    1.70    3.54
   3  10   2   -0.99    2.79
  -3 -10  -2   -0.23    9.50
   3  10   3  141.97   17.47
   3  10   3  186.17   17.10
   3 -10   3  154.77   17.50
   3 -10   3  182.16   17.14
   3 -10   3  198.70   19.03
   3  10   3  146.47   17.15
   3  10   4   -0.29    3.38
   3 -10   4   10.81    8.64
   3  10   4   -0.11    5.49
   3 -10   4   -1.66    3.47
   3  10   4   -5.26    3.17
   3 -10   4   -5.60    5.47
   3 -10   5   35.97    8.20
  -3  10  -5   61.24    6.28
   3  10   5   33.46    8.12
   3 -10   5   50.01   11.80
   3  10   6   17.24    8.06
   3 -10   6   20.12    8.12
  -3  10  -6   35.95    4.55
   3 -10   6   33.23   11.38
  -3 -10  -6   19.54    9.92
  -3 -10  -7    1.80    9.78
   3  10   7    8.48    8.48
   3 -10   7    4.87    8.57
  -3  10  -7   10.94    3.28
   3 -10   8   -0.61    9.23
  -3 -10  -8   -1.62   10.28
   3  10   8   -7.70    9.31
  -3  10  -8    1.41    3.24
   3 -10   9   56.65   12.52
   3  10   9   51.30   12.90
  -3 -10  -9   59.67   12.92
  -3  10  -9   82.53    8.43
  -3  10 -10   65.51    7.06
  -3 -10 -10   56.69   12.85
   3  10  10   39.64   12.85
   3 -10  10   34.55   12.07
  -3  10 -11   17.71    3.84
  -3 -10 -11    7.71    9.93
  -3 -10 -12  180.38   22.33
  -3  10 -12  195.02   19.81
  -3  10 -13  205.79   21.01
  -3 -10 -13  199.24   23.58
  -3  10 -14   -2.37    3.44
  -3 -10 -14   -9.27   11.23
  -3  10 -15   44.06    5.88
  -3 -10 -15   34.10   12.16
  -3  10 -16    6.87    3.93
  -3 -10 -16   -1.34   11.66
  -3  10 -17    4.23    4.00
  -3 -10 -17   -4.12   11.77
  -3 -10 -18    6.20   11.82
  -3  10 -18   10.88    4.24
  -3  10 -19   17.30    4.83
  -3 -10 -19    7.53   12.59
  -3  10 -20   35.25    6.11
  -3 -10 -20   33.60   13.43
  -3  10 -21    5.72    4.72
  -3 -10 -21   -3.36   13.18
   3 -11 -20   16.78   11.82
  -3 -11  20   26.10   34.89
  -3 -11  19  -12.56   30.48
   3 -11 -19    6.66   11.20
   3  11 -19   13.81    4.21
   3 -11 -18    4.32   10.98
  -3  11  18  -10.22   27.60
  -3 -11  18   -7.91   30.83
   3  11 -18   27.22    4.63
   3  11 -17    0.98    3.76
   3 -11 -17   12.07   10.10
  -3 -11  17   34.17   29.79
  -3  11  17   -5.88   24.37
  -3  11  16   -2.80   24.65
   3 -11 -16   -4.59   10.15
   3  11 -16    2.28    3.69
  -3 -11  16  -13.54   28.36
   3 -11 -15   48.09   11.49
  -3 -11  15   55.36   27.42
   3  11 -15   58.63    6.84
  -3  11  15   28.56   24.78
   3  11 -14    1.25    3.36
  -3 -11  14  -33.98   23.48
   3 -11 -14    1.20    9.15
  -3  11  14  -14.55   21.04
  -3 -11  13   -8.18   22.43
   3  11 -13    6.85    3.26
  -3  11  13   10.33   20.03
   3  11 -12   -4.32    3.39
  -3  11  12   -7.62   17.52
  -3 -11  12   19.90   19.01
   3  11 -11   79.27    7.42
  -3  11  11   67.64   15.88
  -3 -11  11   65.91   17.62
  -3  11  11   43.52    7.47
   3 -11 -10   30.38    9.40
   3  11 -10   33.89    4.57
  -3 -11  10   20.99   13.43
  -3  11  10   19.04    4.55
  -3  11  10   13.06   12.02
  -3  11   9    1.34    9.67
   3 -11  -9    1.66    9.21
  -3 -11   9    7.42   10.85
   3  11  -9   -0.18    3.34
  -3  11   9   -1.76    3.52
  -3 -11   8    5.27    9.05
  -3  11   8    4.24    3.63
  -3  11   8    4.71    7.87
   3 -11  -8   11.71    8.35
   3  11  -8   10.41    3.64
  -3  11   7   26.09    4.77
  -3 -11   7   26.04    7.85
  -3  11   7   18.03    7.28
   3  11  -7   42.61    4.86
   3 -11  -7   35.03    9.13
  -3  11   6   16.42    3.93
  -3 -11   6   21.88    6.23
  -3  11   6   15.53    5.86
   3 -11  -6   19.88    8.40
  -3  11   5   20.81    5.28
  -3 -11   5   31.01    5.37
   3 -11  -5   32.16    6.63
  -3  11   5   30.47    4.56
   3 -11  -5   35.42    8.61
  -3  11   4   72.26    8.31
   3 -11  -4   74.38    9.40
  -3 -11   4   73.88    8.27
   3 -11  -4   95.04   11.26
   3 -11  -3    2.43    4.53
  -3  11   3    6.16    2.61
  -3 -11   3    7.32    2.44
   3 -11  -3    4.71    7.26
  -3 -11   2   13.33    2.05
  -3  11   2   10.62    2.32
  -3 -11   2    0.61   12.44
   3 -11  -2    3.48    3.82
   3 -11  -2   10.24    8.08
  -3 -11   1  107.04   17.60
   3  11  -1  120.30   12.26
   3 -11  -1   98.12   14.53
   3  11   0   67.25    7.64
  -3 -11   0   56.03   14.22
   3 -11   0   66.69   10.58
  -3 -11  -1   26.04   11.69
   3 -11   1   18.45    4.93
   3  11   1   10.22    2.98
   3  11   1   20.37    3.62
   3 -11   1   12.08    3.11
   3 -11   1   21.49    8.28
   3  11   2   18.65    3.66
   3 -11   2   19.49    8.19
   3 -11   2   20.05    4.12
   3 -11   2   12.71    3.96
   3  11   2   13.57    3.94
  -3 -11  -2   29.48   11.41
   3 -11   3    3.50    3.51
   3  11   3    6.42    3.19
   3  11   3   -2.06    4.42
   3 -11   3   -2.70    4.73
   3 -11   3    2.52    9.32
  -3 -11  -3    7.12   10.32
   3  11   4   11.40    3.55
   3 -11   4   12.29   10.51
   3  11   4    8.67    5.38
   3 -11   4    8.79    3.62
   3 -11   4    5.06    5.66
   3  11   5   12.80    6.66
   3 -11   5   28.72    7.15
   3 -11   5   35.00    4.77
  -3  11  -5   40.08    4.83
   3  11   5   17.22    4.54
   3 -11   5   39.98   11.14
   3  11   6   13.70    7.23
  -3 -11  -6   20.55   10.53
   3 -11   6   18.86   11.73
  -3  11  -6   32.25    4.60
   3 -11   6   15.75    7.71
   3  11   7    0.16    7.50
   3 -11   7   -2.48    7.92
  -3  11  -7    4.43    3.51
  -3 -11  -7  -10.21   10.14
  -3  11  -8    3.83    3.63
  -3 -11  -8    1.25   10.87
  -3  11  -9    2.02    3.64
  -3 -11  -9   17.49   10.78
  -3  11 -10    5.65    3.65
  -3 -11 -10   -3.41   11.40
  -3  11 -11  236.24   23.90
  -3 -11 -11  221.95   26.45
  -3  11 -12   31.94    4.97
  -3 -11 -12   19.94   11.08
  -3  11 -13    1.24    3.70
  -3 -11 -13    4.11   11.10
  -3  11 -14   36.15    5.53
  -3 -11 -14   46.86   12.45
  -3  11 -15   15.16    4.27
  -3 -11 -15   15.10   12.10
  -3  11 -16    1.76    4.01
  -3 -11 -16  -12.53   12.52
  -3  11 -17   15.63    4.50
  -3 -11 -17   13.81   12.53
  -3 -11 -18    8.00   12.91
  -3  11 -18   -0.69    4.30
  -3 -11 -19    1.89   13.29
  -3  11 -19   12.38    4.73
  -3  11 -20    3.01    4.91
  -3 -11 -20    7.75   14.13
   3 -12 -20   31.06   12.77
  -3 -12  20   40.91   36.66
   3 -12 -19    6.18   12.00
  -3 -12  19   45.45   33.96
   3  12 -18   34.13    5.53
  -3 -12  18    4.39   32.05
   3 -12 -18   34.72   11.98
   3 -12 -17   18.74   11.02
   3  12 -17   24.54    4.74
   3 -12 -16   10.91   10.97
   3  12 -16   16.13    4.38
  -3 -12  16   33.13   27.61
  -3 -12  15   17.48   24.92
   3  12 -15   33.79    5.19
   3 -12 -15   28.15   10.85
   3  12 -14   -0.21    3.76
   3 -12 -14    7.50   10.21
  -3 -12  14   13.01   21.44
  -3 -12  13  165.99   26.06
  -3  12  13  128.28   18.56
  -3 -12  12    1.29   15.57
   3  12 -12   11.01    3.63
  -3  12  12    1.87    4.05
  -3 -12  11    5.40   12.73
   3  12 -11    4.89    3.69
  -3  12  11    1.37    3.95
   3 -12 -11   15.96    9.32
   3  12 -10    7.71    3.70
  -3  12  10    7.36    3.71
  -3 -12  10   -6.19   10.35
   3 -12 -10   -6.52    9.06
  -3  12   9   27.67    5.15
  -3 -12   9   24.24    9.73
   3  12  -9   46.10    5.42
   3 -12  -9   37.21   10.15
  -3  12   8    0.99    3.52
  -3 -12   8    3.68    7.47
   3  12  -8    3.24    3.83
   3 -12  -8    3.77    9.30
  -3 -12   7  161.82   22.40
   3 -12  -7  213.65   23.65
  -3  12   7  181.62   21.77
  -3 -12   6   10.20    5.18
   3 -12  -6   14.61    8.90
  -3  12   6   14.03    3.88
   3 -12  -5    0.81    5.27
   3 -12  -5   -7.78    8.70
  -3 -12   5    0.75    3.49
  -3 -12   4   24.73    3.55
   3 -12  -4   22.30    5.09
   3 -12  -4   22.93    9.25
  -3 -12   3   59.78    5.85
   3 -12  -3   67.20   10.93
   3 -12  -3   39.87    6.62
  -3 -12   2   27.61   14.26
   3 -12  -2   14.43    9.07
  -3 -12   1   29.31   14.52
   3 -12  -1   30.85    9.96
   3  12  -1   26.81    4.48
   3  12   0    4.83    3.63
  -3 -12   0    2.27   13.59
   3 -12   0    2.03    9.23
  -3 -12  -1   -0.31   12.88
   3  12   1    2.36    3.35
   3 -12   1    9.96    8.78
   3  12   2    7.42    3.41
   3 -12   2    6.30    9.82
  -3 -12  -2   12.57   12.34
   3  12   3   38.45    5.19
   3 -12   3   35.97    5.29
   3 -12   3   39.44   10.74
  -3 -12  -3   55.75   12.50
   3  12   4    2.49    3.31
   3 -12   4   12.64   12.01
   3 -12   4   -1.72    3.52
   3 -12   5    7.57    3.82
   3 -12   5    0.79   12.11
  -3  12  -5   15.69    4.13
   3  12   5    7.29    3.77
   3  12   6   37.11    6.25
   3 -12   6   75.29   14.25
  -3  12  -6   60.65    6.63
  -3  12  -7   29.83    4.93
  -3 -12  -7    2.63   11.10
  -3  12  -8  168.90   16.78
  -3 -12  -8  114.72   19.89
  -3 -12  -9  246.41   31.21
  -3  12  -9  292.61   28.91
  -3  12 -10    0.83    3.80
  -3 -12 -10   -4.26   11.45
  -3  12 -11    9.55    3.96
  -3 -12 -11   -1.15   11.15
  -3  12 -12  135.84   14.07
  -3 -12 -12  103.84   18.17
  -3 -12 -13   87.59   18.28
  -3  12 -13  132.12   13.61
  -3  12 -14   -1.13    4.10
  -3 -12 -14    2.43   12.50
  -3  12 -15    5.57    4.33
  -3 -12 -15    8.66   12.88
  -3  12 -16   10.84    4.55
  -3 -12 -16    2.20   12.65
  -3  12 -17   24.79    5.39
  -3 -12 -17   27.50   13.27
  -3  12 -18    4.66    4.78
  -3 -12 -18    1.96   13.85
  -3 -12 -19   30.41   15.08
  -3  12 -19   56.77    7.64
   3 -13 -19    5.62   12.66
   3 -13 -18  -20.44   12.29
   3 -13 -17    4.17   11.90
   3  13 -17   24.29    5.03
   3  13 -16   -3.71    4.23
   3 -13 -16   -8.15   11.35
   3  13 -15   -4.43    4.17
  -3 -13  15  -10.51   19.16
  -3  13  15    0.92    4.48
   3 -13 -15   -7.68   10.90
   3  13 -14   -0.80    3.94
  -3 -13  14   -1.83   16.80
  -3  13  14    2.69    4.42
   3 -13 -14   -4.44   10.79
  -3  13  13   -5.47    4.27
  -3 -13  13    2.50   14.78
   3  13 -13    2.27    4.05
   3  13 -12    5.17    3.95
  -3 -13  12   -2.15   13.24
  -3  13  12    6.18    3.89
  -3  13  11    5.27    3.94
   3  13 -11   21.95    4.20
  -3 -13  11   14.92   10.90
   3 -13 -11   12.44   10.11
   3  13 -10   21.33    4.50
  -3  13  10   13.39    4.01
  -3 -13  10    4.60    8.77
   3 -13 -10   18.65   10.03
  -3 -13   9   31.49    8.10
  -3  13   9   23.50    4.70
   3  13  -9   40.69    5.27
   3 -13  -9   32.31   10.18
  -3  13   8   12.18    3.89
  -3 -13   8    7.27    6.42
   3 -13  -8    0.24    9.44
   3  13  -8   23.68    4.35
  -3 -13   7  188.19   23.67
   3 -13  -7  242.55   25.59
  -3  13   7  192.90   23.48
  -3  13   6    1.86    3.51
  -3 -13   6   -2.72    3.75
   3 -13  -6    0.69    9.10
  -3 -13   5    4.41    2.67
   3 -13  -5    7.34    9.60
   3 -13  -4    6.36    9.68
   3 -13  -3   21.91    9.59
  -3 -13   2   89.13   18.65
   3 -13  -2   87.98   13.62
  -3 -13   1   63.82   16.62
   3 -13  -1   55.97   11.88
   3 -13   0  119.69   16.55
  -3 -13   0  150.72   20.69
   3  13   0  125.72   13.45
   3 -13   1   15.98   10.21
   3  13   1   22.61    4.44
  -3 -13  -1   25.15   14.27
   3 -13   2    6.97   11.34
   3  13   2   10.78    3.87
  -3 -13  -2   15.26   13.60
   3  13   3   11.90    3.76
  -3 -13  -3    5.38   12.82
   3 -13   3   29.48   11.97
  -3 -13  -4    1.45   12.25
   3  13   4   -0.89    3.57
   3 -13   4   -8.47   13.13
   3  13   5   21.87    4.22
   3 -13   5   18.21   13.93
  -3  13  -5   20.72    4.91
   3 -13   6  148.79   21.46
   3  13   6  109.32   15.96
   3  13   7   63.17   10.01
  -3 -13  -7   77.67   15.00
  -3  13  -8   -0.90    4.24
   3  13   8    2.68    3.67
  -3 -13  -8   -3.45   11.53
  -3  13  -9    7.72    4.35
  -3 -13  -9   13.15   11.92
  -3  13 -10   23.97    4.98
  -3 -13 -10   17.05   12.32
  -3  13 -11    2.09    4.20
  -3 -13 -11    2.15   11.97
  -3  13 -12   11.32    4.47
  -3 -13 -12   17.98   12.94
  -3  13 -13   13.67    4.70
  -3 -13 -13   26.37   13.36
  -3  13 -14   28.69    5.53
  -3 -13 -14   23.96   13.34
  -3  13 -15   36.14    6.03
  -3 -13 -15   35.31   14.60
  -3  13 -16   -0.29    4.58
  -3 -13 -16   12.60   13.76
  -3  13 -17   69.49    9.00
  -3 -13 -17   75.15   15.90
  -3  13 -18    0.61    4.95
  -3 -13 -18   17.32   14.91
   3 -14 -18   35.54   14.06
   3  14 -17   15.48    4.60
  -3  14  17   -1.90    5.03
   3 -14 -17    5.43   12.72
   3  14 -16   26.97    5.08
  -3  14  16    8.54    5.24
   3 -14 -16   23.69   12.54
  -3  14  15    6.42    4.72
   3  14 -15    7.34    4.25
   3 -14 -15   14.33   11.76
   3  14 -14   13.15    4.57
  -3  14  14    2.77    4.56
   3  14 -13   82.69    7.49
  -3  14  13   35.50    7.18
  -3  14  12   19.74    4.93
   3  14 -12   37.08    5.35
   3 -14 -12   15.26   11.36
  -3  14  11   18.17    4.92
   3 -14 -11   19.23   11.12
   3  14 -10   -1.01    4.26
   3 -14 -10    3.76   10.47
  -3  14  10   -0.22    3.65
  -3  14   9   24.86    5.01
   3  14  -9   46.15    5.73
   3 -14  -9   24.65   11.01
  -3  14   8    1.72    3.56
   3  14  -8   15.79    4.48
   3 -14  -8   14.73    9.96
  -3  14   7  123.38   16.39
   3 -14  -7  153.39   19.43
  -3  14   6    6.81    3.70
   3 -14  -6   -2.03   10.18
   3 -14  -5   29.11   10.43
   3 -14  -4   31.82   10.63
   3 -14  -3   41.67   11.30
   3 -14  -2   32.77   11.30
  -3 -14   1    7.39   16.01
   3 -14  -1   -4.84   10.20
   3  14   0   31.21    5.15
   3 -14   0   27.02   10.79
  -3 -14   0   38.29   15.94
   3  14   1    1.88    3.71
  -3 -14  -1  -14.15   14.92
   3 -14   1   -5.26   10.95
   3 -14   2    4.12   11.07
   3  14   2   -0.53    3.55
  -3 -14  -2    2.48   14.47
   3  14   3  174.11   19.05
  -3 -14  -3  245.11   23.91
   3 -14   3  210.31   23.22
  -3 -14  -4    4.42   12.66
   3  14   4   12.53    3.86
   3 -14   4   17.21   13.79
   3  14   5   -0.73    3.51
   3 -14   5   -9.94   14.14
  -3  14  -5    1.22    4.51
   3  14   6    9.98    3.72
  -3  14  -6   17.23    4.90
   3  14   7   -0.68    3.78
  -3  14  -7   -0.97    4.38
   3  14   8    8.09    4.16
  -3  14  -8    9.35    4.64
   3  14   9    7.37    4.26
  -3  14  -9   27.52    5.12
  -3 -14  -9    2.81   12.68
  -3  14 -10   -1.14    4.70
  -3 -14 -10  -10.16   12.80
  -3 -14 -11   -6.48   13.29
  -3  14 -11    1.57    4.62
  -3  14 -12    6.82    4.77
  -3 -14 -12    4.97   13.48
  -3  14 -13   26.02    5.58
  -3 -14 -13   17.03   13.48
  -3  14 -14   10.05    4.93
  -3 -14 -14    7.69   14.14
  -3  14 -15    5.84    4.83
  -3 -14 -15    9.24   14.33
  -3  14 -16    3.69    5.05
  -3 -14 -16   12.31   14.89
  -3  14 -17   -0.32    5.10
  -3 -14 -17    4.79   14.95
   3  15 -16    7.06    4.74
  -3  15  16   -1.85    4.94
   3 -15 -16   -1.31   13.09
  -3  15  15    0.53    4.69
   3  15 -15    5.09    4.63
   3 -15 -15    8.65   12.71
   3  15 -14    4.24    4.81
  -3  15  14    3.78    4.21
  -3  15  13   -1.20    4.12
   3  15 -13    3.08    4.50
   3  15 -12   -3.78    4.79
  -3  15  12   -4.68    3.92
   3 -15 -11   52.50   13.24
  -3  15  11   43.60    7.58
  -3  15  10    4.99    3.78
   3 -15 -10   -2.32   11.26
   3  15 -10    6.40    4.60
  -3  15   9    4.70    4.00
   3  15  -9   12.61    4.67
   3 -15  -9    6.02   11.71
  -3  15   8    2.24    3.74
   3  15  -8    5.80    4.61
  -3  15   7   16.98    4.56
   3 -15  -7    3.64   11.39
   3 -15  -6   -1.95   11.37
   3 -15  -5   27.20   11.43
   3 -15  -4   33.23   11.85
   3 -15  -3   16.13   11.19
   3 -15  -2  -10.81   10.56
   3 -15  -1  152.39   19.24
  -3 -15   1  136.17   23.24
  -3 -15   0    6.55   16.11
   3 -15   0   -0.81   11.03
   3  15   1   43.48    5.98
   3 -15   1   34.66   12.32
  -3 -15  -1   44.49   16.81
   3  15   2   11.29    4.11
  -3 -15  -2   12.19   14.95
   3 -15   2   22.70   12.05
  -3 -15  -3   49.24   15.44
   3 -15   3   51.52   14.74
   3  15   3   35.28    5.51
   3 -15   4   -9.27   14.69
  -3 -15  -4   -7.00   14.03
   3  15   4    2.38    3.69
  -3 -15  -5   -6.42   13.75
   3 -15   5   -1.41   15.88
  -3  15  -5    7.30    4.75
   3  15   5    4.37    3.79
   3  15   6    8.20    3.76
  -3  15  -6   12.45    5.13
  -3  15  -7   98.14    8.06
   3  15   7   35.89    6.80
   3  15   8   -0.23    3.80
  -3  15  -8    2.86    5.01
  -3 -15  -8   12.41   13.32
   3  15   9   34.84    7.13
  -3 -15  -9   44.24   14.64
  -3  15 -10   12.04    5.27
  -3 -15 -10   21.80   13.49
   3  15  10    5.16    4.33
  -3 -15 -11    1.03   13.18
  -3  15 -11   -1.24    5.09
   3  15  11   -1.87    4.45
  -3  15 -12    5.09    5.16
  -3 -15 -12   -3.84   14.11
  -3 -15 -13   38.46   16.05
  -3  15 -13   77.70    9.37
  -3  15 -14    2.87    5.23
  -3 -15 -14   17.06   14.35
  -3  15 -15   20.44    5.69
  -3 -15 -15    8.15   15.39
  -3 -15 -16   -7.57   15.53
  -3  15 -16   -0.49    5.23
   3  16 -15   26.50    5.79
  -3  16  15   12.95    5.03
   3  16 -14    5.45    4.88
  -3  16  14   -0.13    4.38
   3  16 -13   35.95    5.87
  -3  16  13    9.60    4.63
   3 -16 -13   14.16   12.87
  -3  16  12    1.21    4.12
   3  16 -12    3.09    5.02
   3  16 -11   83.61    8.39
  -3  16  11   47.58    7.51
   3 -16 -11   58.84   14.01
  -3  16  10    4.31    4.06
   3  16 -10   -1.77    5.18
   3 -16 -10  -11.38   12.24
  -3  16   9    3.78    3.73
   3  16  -9    4.59    5.15
  -3  16   8    0.70    3.88
   3 -16  -8    2.77   12.39
   3  16  -8   -2.76    4.94
   3 -16  -7   -3.68   12.01
  -3  16   7    3.97    3.85
   3  16  -7    2.85    5.01
   3 -16  -6   17.31   12.30
   3 -16  -5   -2.99   11.76
   3 -16  -4   50.62   13.17
   3 -16  -3   37.17   12.64
   3 -16  -2   28.25   12.20
  -3 -16   1   12.01   18.06
   3 -16  -1   10.66   12.34
  -3 -16   0  -10.49   17.75
   3 -16   0    0.88   12.40
  -3 -16  -1   -0.86   17.03
   3 -16   1    8.46   13.08
   3  16   1   10.47    4.13
   3  16   2   16.52    4.40
   3 -16   2   12.05   14.02
  -3 -16  -2   15.36   17.07
   3  16   3   67.04    8.22
   3 -16   3   76.59   16.97
  -3 -16  -3   77.87   18.08
   3  16   4    6.83    3.85
   3 -16   4   27.87   16.12
  -3 -16  -4   20.17   15.87
   3  16   5    3.37    3.91
   3 -16   5   13.78   17.31
  -3 -16  -5   23.39   15.14
  -3  16  -5   10.27    5.19
   3  16   6   10.08    3.75
  -3  16  -6   -7.54    5.49
   3  16   7    4.02    3.90
  -3  16  -7   12.67    5.44
  -3  16  -8    3.55    5.32
   3  16   8    1.16    3.92
  -3 -16  -8    5.46   14.42
   3  16   9    4.25    4.02
  -3  16  -9   12.67    5.52
  -3 -16  -9   -5.09   14.19
  -3  16 -10   34.12    6.09
   3  16  10   14.13    4.85
  -3 -16 -10   24.83   14.98
  -3  16 -11   20.76    5.71
  -3 -16 -11   -5.15   14.70
   3  16  11    4.91    4.66
  -3  16 -12   19.91    6.00
   3  16  12    9.03    5.08
  -3 -16 -12   18.55   14.61
  -3  16 -13   30.13    6.42
   3  16  13   21.03    5.63
  -3 -16 -13   24.42   15.08
  -3  16 -14   16.60    5.74
   3  16  14    8.68    5.26
   3 -17 -13   10.67   13.96
   3  17 -13    4.10    5.68
  -3  17  13    6.41    4.49
   3  17 -12    3.48    5.47
   3 -17 -12   -1.75   13.99
  -3  17  12   -0.49    4.12
  -3  17  11    6.29    4.43
   3 -17 -11   35.48   13.55
   3  17 -11   33.11    6.17
   3  17 -10   44.90    6.52
  -3  17  10   25.34    5.23
   3 -17 -10   20.17   13.78
  -3  17   9    7.00    4.04
   3 -17  -9   13.22   13.41
   3  17  -9    0.15    5.33
  -3  17   8   -0.25    4.13
   3  17  -8  -10.08    5.61
   3 -17  -8    1.68   13.22
   3 -17  -7   -5.93   13.12
   3  17  -7    6.21    5.16
   3 -17  -6   18.07   12.87
   3 -17  -5   -2.51   12.74
   3 -17  -4    7.41   12.69
   3 -17  -3    1.54   12.73
   3 -17  -2   23.27   13.30
   3 -17  -1  119.69   19.87
  -3 -17   1  168.40   24.52
   3 -17   0   90.23   16.38
  -3 -17   0   74.95   20.92
   3 -17   1   42.78   14.66
  -3 -17  -1   20.31   18.17
   3  17   2    5.82    4.10
  -3 -17  -2  -13.32   18.53
   3 -17   2   -4.41   16.18
   3  17   3    5.91    4.11
   3 -17   3   -6.65   16.42
  -3 -17  -3  -12.20   18.49
   3  17   4   -2.39    4.07
   3 -17   4   -3.59   17.25
  -3 -17  -4   30.23   17.10
   3 -17   5   -4.49   18.11
   3  17   5    1.97    3.79
  -3  17  -5    3.81    5.42
  -3 -17  -5   -5.32   16.19
   3  17   6   63.47    9.35
  -3 -17  -6   56.51   17.97
   3  17   7   20.98    5.14
  -3  17  -7   51.97    6.85
   3  17   8    7.14    4.39
  -3  17  -8   19.48    6.06
  -3 -17  -9   38.80   16.51
   3  17   9   37.61    6.58
   3  17  10    4.61    4.22
  -3  17 -10   14.70    6.10
  -3 -17 -10    9.03   15.43
  -3  17 -11    2.70    5.88
   3  17  11    2.26    4.36
   3  17  12   -0.68    4.56
  -3 -17 -12    4.37   16.40
  -3  17 -12   -2.53    5.92
  -3  17 -13   16.08    6.47
  -3 -17 -13   27.96   16.58
   3  18 -11    3.35    5.86
  -3  18  11    0.74    4.10
   3 -18 -11   -6.35   15.39
   3  18 -10    0.17    5.85
  -3  18  10    0.13    4.25
   3 -18 -10    9.21   15.05
  -3  18   9   -0.51    4.38
   3 -18  -9    2.90   14.34
   3  18  -9   -1.31    5.70
  -3  18   8   -2.31    4.25
   3  18  -8   -3.62    5.55
   3 -18  -8   -2.86   13.94
   3  18  -7   26.78    6.16
   3 -18  -7    0.35   13.93
   3 -18  -6   -6.09   13.11
   3 -18  -5    0.33   13.37
   3 -18  -4   45.35   14.17
   3 -18  -3   32.98   14.51
   3 -18  -2    1.68   13.56
   3 -18  -1   26.55   14.50
  -3 -18   0   -5.01   19.92
   3 -18   0   35.22   14.58
   3 -18   1   -8.28   16.02
  -3 -18  -1    0.49   19.69
   3 -18   2   20.45   17.51
  -3 -18  -2   -2.45   19.73
   3  18   3    7.48    4.24
  -3 -18  -3   -5.35   18.71
   3 -18   3   15.11   17.77
  -3 -18  -4   14.77   18.88
   3  18   4   17.99    4.85
   3 -18   4   25.14   18.66
  -3  18  -4   32.78    6.31
   3  18   5    1.23    4.22
  -3 -18  -5   20.00   17.69
  -3  18  -5    1.05    5.70
   3  18   6   11.92    4.34
  -3  18  -6   21.26    6.19
  -3 -18  -6    9.61   17.47
   3  18   7    4.13    4.04
  -3  18  -7   -0.90    5.96
   3  18   8   -1.72    4.39
  -3  18  -8   12.41    6.04
  -3  18  -9   22.38    6.61
   3  18   9    5.16    4.41
  -3 -18  -9   31.84   17.20
   3  18  10    8.22    4.71
  -3  18 -10   32.19    6.61
  -3 -18 -10   31.08   17.17
  -3 -18 -11   -6.34   17.49
  -3  19   8   -5.90    4.37
   3  19  -8    2.77    5.78
   3 -19  -8   11.44   14.71
   3  19  -7    1.37    5.84
   3 -19  -7  -25.00   14.87
   3 -19  -6   27.97   15.15
   3  19  -6   24.61    6.57
   3 -19  -5   -5.34   13.99
   3 -19  -4   24.41   15.68
   3 -19  -3  -16.19   15.29
   3 -19  -2   -7.63   15.33
   3 -19  -1   13.14   16.21
   3 -19   0   50.71   17.86
  -3 -19   0   36.72   22.21
  -3 -19  -1    0.53   21.39
   3 -19   1   -8.84   17.03
  -3 -19  -2   13.51   20.21
   3 -19   2    6.64   19.07
  -3 -19  -3   -1.55   20.80
   3 -19   3  -15.69   19.43
   3 -19   4   -3.67   19.95
   3  19   4   -1.02    4.22
  -3  19  -4    6.86    5.89
  -3 -19  -4  -11.89   20.32
   3  19   5    1.17    4.28
  -3  19  -5    3.85    6.05
  -3 -19  -5   16.73   20.16
  -3  19  -6   75.91    8.54
   3  19   6   33.26    6.68
  -3 -19  -6   76.37   20.63
   3  19   7    1.38    4.41
  -3  19  -7   -1.13    6.29
   3  19   8   -1.52    4.31
  -3  19  -8  -14.84    6.86
   3 -20  -3   23.94   16.94
   3 -20  -2   17.94   17.34
   3 -20  -1   -3.28   17.17
   3 -20   0   12.23   17.54
  -3 -20  -1   10.01   22.32
   3 -20   1   25.13   19.94
   3 -20   2   20.17   20.33
  -3 -20  -2   23.44   22.80
   3 -20   3    6.74   20.99
  -4   0  24   24.53   50.57
  -4   0  23   16.56   47.58
   4   0 -23    1.09    9.22
   4   0 -22  -15.01    8.55
   4   0 -22    2.52    3.48
  -4   0  22  -11.41   42.93
   4   0 -21    3.21    3.38
  -4   0  21    2.20   41.69
   4   0 -21   -3.55    8.48
   4   0 -20  109.39   15.15
  -4   0  20   90.31   44.51
   4   0 -20  128.50   13.10
   4   0 -19   -2.32    3.09
   4   0 -19   -3.59    7.49
  -4   0  19  -38.75   41.02
   4   0 -18   56.27   10.99
  -4   0  18   51.80   37.92
   4   0 -18   86.28    8.86
   4   0 -17    0.49    2.68
   4   0 -17   -4.09    6.50
  -4   0  17   26.10   36.68
   4   0 -16   41.35    8.03
   4   0 -16   41.82    5.04
  -4   0  16   68.95   37.35
   4   0 -15   -5.86    5.99
   4   0 -15   -0.61    2.11
  -4   0  15  -29.97   34.69
   4   0 -14    2.03    1.96
   4   0 -14    3.85    5.71
  -4   0  14   -7.77   32.50
   4   0 -13    0.26    5.14
  -4   0  13    5.77   27.77
   4   0 -13   -0.09    1.73
   4   0 -12  165.07   16.35
   4   0 -12  148.71   17.17
  -4   0  12  186.35   31.60
   4   0 -11   -3.69    4.36
  -4   0  11    4.22   22.29
   4   0 -11   -0.17    1.33
  -4   0  10   76.37   23.71
   4   0 -10   88.65    8.93
   4   0 -10   82.79   10.11
   4   0  -9   -0.39    1.21
  -4   0   9    3.03   18.98
   4   0  -8  246.30   24.62
  -4   0   8  295.09   32.49
   4   0  -7    0.85    1.09
  -4   0   7    1.40   19.73
  -4   0   6  381.90   38.04
  -4   0   6  423.46   41.45
  -4   0   5   -0.70   10.33
  -4   0   5    0.02    0.61
  -4   0   4 1424.14  154.51
  -4   0   4 1552.19  153.71
  -4   0   3  -10.40    7.18
   4   0  -3   11.01    9.82
  -4   0   2   76.63    9.57
   4   0  -2   68.89   10.97
  -4   0   1   -0.19    0.54
   4   0  -1    4.18    6.73
  -4   0   1    3.59    4.92
   4   0  -1    0.15    0.65
   4   0   0  297.61   29.66
  -4   0   0  294.32   30.19
  -4   0   0  301.07   29.66
   4   0   0  270.74   30.36
  -4   0  -1    4.17    3.54
   4   0   1    0.50    5.03
   4   0   1   -0.16    0.91
  -4   0  -1    1.19    0.93
  -4   0  -2   98.17   10.64
   4   0   2   93.54    9.70
  -4   0  -2   98.81    9.69
   4   0   2   99.31   10.92
   4   0   3    0.28    1.08
  -4   0  -3    2.85    3.47
   4   0   3    5.66    4.45
  -4   0  -3   -0.32    1.06
   4   0   3   -0.12    2.63
   4   0   4  570.04   60.04
  -4   0  -4  647.58   60.36
   4   0   4  633.68   60.06
  -4   0  -5    1.54    2.56
  -4   0  -6  524.29   52.26
   4   0   7    1.55    1.91
  -4   0  -7    1.72    2.95
   4   0   8  292.99   31.35
  -4   0  -8  324.89   31.52
  -4   0  -8  333.50   31.40
  -4   0  -9   -0.83    3.38
   4   0   9    4.57    9.51
  -4   0  -9    0.16    1.75
  -4   0 -10  615.54   59.77
  -4   0 -10  606.57   59.86
   4   0  10  442.87   61.43
  -4   0 -11    1.97    4.04
   4   0  11   -9.40   12.51
  -4   0 -11    0.06    2.01
  -4   0 -12   21.98    3.18
   4   0  12   23.62   12.62
  -4   0 -13   -2.43    2.38
   4   0  13   -5.70   13.93
  -4   0 -14   17.71    3.24
   4   0  14   21.75   16.94
   4   0  15   -1.88   17.43
  -4   0 -15   -1.43    2.81
  -4   0 -16   78.98    8.63
   4   0  16   45.81   20.09
  -4   0 -17   -0.98    3.09
   4   0  17   -4.32   19.13
   4   0  18   55.33   22.79
  -4   0 -18   62.34    7.37
  -4   0 -19    2.03    3.53
   4   0  19   -3.60   20.60
  -4   0 -20    5.37    3.85
  -4   0 -21   -3.44    4.05
  -4   0 -22   80.18    9.51
  -4   0 -23    0.56    4.57
  -4   0 -24   -0.15    4.79
   4   1 -24   37.17   10.31
  -4   1  24   76.73   51.20
   4   1 -23    1.91    9.07
  -4   1  23   15.51   48.17
  -4   1  22   -2.30   44.39
   4   1 -22    5.65    8.52
   4   1 -22    5.85    4.29
   4  -1 -21   -2.05    8.23
   4   1 -21    1.75    3.61
   4   1 -21   -6.81    7.98
  -4   1  21   22.22   44.35
   4  -1 -20   64.77   11.73
   4   1 -20   68.57   11.55
   4   1 -20   90.97    9.10
   4   1 -19    4.27    7.40
   4   1 -19   -0.86    2.89
   4  -1 -19    0.18    7.45
  -4   1  19  -11.32   39.48
   4  -1 -18   33.09    8.44
   4   1 -18   35.92    8.55
   4   1 -18   51.47    5.64
  -4   1  18   33.42   38.39
   4   1 -17    1.49    2.49
   4  -1 -17    2.83    6.63
   4   1 -17   -5.97    6.42
   4  -1 -17    2.39    2.47
  -4   1  17    7.49   35.74
   4   1 -16   22.25    3.43
   4  -1 -16   23.30    3.41
   4   1 -16   12.27    6.62
   4  -1 -16   26.79    7.09
  -4   1  16   -3.55   35.38
   4  -1 -15   27.79    3.57
   4  -1 -15   21.67    6.94
   4   1 -15   25.46    3.55
   4   1 -15   17.59    6.28
  -4   1  15   40.04   32.47
   4  -1 -14  264.37   30.59
   4   1 -14  247.31   30.50
   4   1 -14  316.89   29.85
  -4   1  14  290.20   46.09
   4  -1 -14  303.52   29.84
   4  -1 -13   41.81    7.66
   4   1 -13   56.84    5.76
  -4   1  13   36.02   28.39
   4  -1 -13   52.42    5.74
   4   1 -13   47.83    7.53
   4  -1 -12   10.26    4.96
   4   1 -12   16.05    2.48
  -4   1  12    1.32   25.84
   4  -1 -12   20.14    2.47
   4  -1 -11   13.32    1.97
   4   1 -11   10.97    1.93
   4  -1 -11   10.16    4.59
  -4   1  11    6.60   23.76
  -4   1  10   14.26   20.72
   4   1 -10    0.67    1.26
   4  -1 -10    1.40    4.11
   4   1  -9   41.28    4.35
  -4   1   9   40.68   20.33
  -4   1   8  214.81   27.61
  -4   1   8  160.28   16.57
   4   1  -8  170.76   16.57
  -4   1   7  131.42   22.05
   4  -1  -7  103.89   10.95
   4   1  -7   97.42   10.13
  -4  -1   7  104.22   10.14
   4  -1  -6   44.06    6.11
   4   1  -6   47.87    5.05
  -4   1   6   59.08   14.86
  -4  -1   6   52.66    5.06
  -4   1   5   39.10   11.27
   4   1  -5   42.74    4.45
  -4  -1   5   45.43    4.47
  -4   1   5   44.81    4.49
  -4   1   4 1678.78  167.52
  -4   1   3  167.08   19.88
   4   1  -3  125.53   20.71
  -4   1   3  189.21   18.49
  -4   1   2  531.98   55.89
   4   1  -2  492.20   56.17
   4  -1  -2  564.32   55.25
  -4   1   1    8.01    4.70
   4   1  -1    7.48    6.64
  -4   1   0   38.86    3.81
  -4   1   0   35.70    5.49
  -4  -1   0   36.99    3.76
   4  -1   0   35.11    3.84
   4   1   0   36.59    3.75
   4   1   0   35.62    7.02
  -4   1  -1   52.72    5.95
   4   1   1   39.92    6.14
  -4  -1  -1   42.89    4.12
   4   1   1   39.50    4.11
   4  -1   1   38.98    4.21
  -4   1  -1   37.61    4.14
   4  -1   2 3502.65  338.99
  -4  -1  -2 3524.34  338.98
   4   1   2 3506.48  339.23
   4   1   2 3217.96  338.96
   4   1   2 3136.55  339.13
  -4   1  -2 3514.46  338.99
  -4   1  -2 3569.26  339.24
   4   1   3  235.58   25.35
   4   1   3  258.10   25.86
  -4   1  -3  265.79   25.38
  -4  -1  -3  266.32   25.37
   4   1   3  253.34   25.62
  -4   1  -3  253.28   25.79
   4  -1   3  255.53   25.38
   4   1   4  705.58   68.03
  -4  -1  -4  677.72   68.13
  -4  -1  -4  666.89   67.91
  -4   1  -4  707.87   68.20
   4   1   5  179.13   18.10
  -4  -1  -5  178.89   18.27
  -4  -1  -6    3.68    3.56
  -4   1  -7   54.52    5.72
  -4  -1  -7   47.16    6.61
   4   1   8  824.06   85.38
  -4  -1  -8  862.04   85.51
  -4   1  -8  893.95   85.32
  -4   1  -8  841.31   85.36
  -4  -1  -9    6.01    4.08
   4   1   9    8.18    3.09
  -4  -1  -9    7.22    1.87
  -4   1  -9    9.97    2.07
   4   1   9   13.04   11.46
  -4  -1 -10   -0.30    4.28
   4   1  10   -1.26    2.84
   4   1  10    7.29   10.46
  -4  -1 -10    2.05    1.82
  -4   1 -10    2.31    1.82
  -4  -1 -11    9.37    4.78
  -4  -1 -11   10.06    2.28
   4   1  11    8.14   11.71
  -4   1 -11   13.87    2.40
  -4   1 -12  337.55   34.53
  -4  -1 -12  338.88   34.86
  -4  -1 -12  364.95   34.54
   4   1  12  240.17   37.49
  -4  -1 -13   88.08   10.60
  -4   1 -13   90.96    9.49
  -4  -1 -13   89.54    9.47
   4   1  13   67.27   16.99
  -4  -1 -14   43.04    7.25
  -4  -1 -14   35.17    4.61
  -4   1 -14   35.64    4.66
   4   1  14   12.31   16.69
   4   1  15   35.61   18.50
  -4  -1 -15   37.14    7.96
  -4  -1 -15   45.25    5.28
  -4   1 -15   40.22    5.30
  -4  -1 -16   75.76    8.14
  -4  -1 -16   88.41   10.30
  -4   1 -16   66.61    8.06
   4   1  16   29.37   20.13
  -4  -1 -17    5.42    7.09
  -4   1 -17    7.75    3.18
   4   1  17   -4.37   18.52
  -4  -1 -17    2.30    3.28
  -4  -1 -18   20.91    3.99
  -4  -1 -18   24.99    7.46
  -4   1 -18   14.44    3.86
  -4  -1 -19   -0.60    7.83
  -4   1 -19   -4.46    3.63
  -4  -1 -19   -3.80    3.64
   4   1  19   -6.07   21.44
  -4   1 -20   80.42    9.06
  -4  -1 -20   75.43    9.00
  -4  -1 -21   -1.14    4.09
  -4   1 -21    0.51    4.09
  -4  -1 -22    2.48    4.27
  -4   1 -22    0.96    4.34
  -4   1 -23   -4.16    4.74
  -4  -1 -23   -3.77    4.71
  -4  -1 -24   23.93    5.69
  -4   1 -24   21.25    5.63
   4   2 -24   29.28   10.36
  -4   2  24   58.70   49.58
  -4  -2  24   35.60   46.58
   4   2 -23   30.45    9.66
  -4   2  23    2.41   45.50
  -4  -2  23   49.21   45.07
   4   2 -22   14.17    8.85
   4   2 -22   27.72    4.33
  -4  -2  22   12.10   42.18
  -4   2  22   13.88   46.13
  -4   2  21   18.86   42.74
   4   2 -21   -0.19    8.16
   4   2 -21    1.13    3.23
   4   2 -20  115.38   11.49
   4   2 -20   84.24   13.50
  -4   2  20   29.87   41.55
  -4  -2  20   39.69   41.38
   4   2 -19    2.11    3.06
   4   2 -19    0.35    7.22
   4  -2 -19    2.90    7.92
   4   2 -18   49.62    5.70
   4  -2 -18   33.35    9.19
   4   2 -18   44.85    8.15
  -4   2  18   55.70   38.55
   4   2 -17   28.39    3.75
   4  -2 -17   13.60    7.35
   4   2 -17   14.53    6.92
   4  -2 -16    5.89    7.07
   4   2 -16    2.48    6.53
   4   2 -16    6.51    2.63
   4   2 -15   42.77    7.84
   4   2 -15   50.59    5.48
   4  -2 -15   37.03    8.32
  -4   2  15   42.75   36.23
   4   2 -14   80.76    8.34
  -4   2  14   95.10   31.35
   4  -2 -14   71.23   10.23
   4  -2 -13    6.76    5.61
   4   2 -13    2.36    1.76
  -4   2  13  -12.04   28.06
   4  -2 -12   51.61    7.89
  -4   2  12   51.73   27.05
   4   2 -12   55.55    5.85
  -4   2  11   31.94   23.18
   4   2 -11   34.16    3.74
   4  -2 -11   25.99    6.06
  -4   2  10  541.27   57.76
   4   2 -10  515.28   51.36
  -4   2   9  439.60   42.71
   4   2  -9  351.64   35.18
  -4   2   8   98.01   23.39
   4   2  -8   84.42    8.56
   4   2  -7  169.02   17.51
  -4  -2   7  180.64   17.52
  -4   2   7  172.14   26.20
  -4   2   7  179.06   17.56
   4  -2  -7  168.33   18.15
  -4  -2   6   25.64    2.74
   4  -2  -6   27.42    4.57
  -4   2   6   24.01    2.78
   4   2  -6   26.50    2.72
  -4   2   6   18.17   13.82
  -4  -2   5    8.71    1.22
  -4   2   5    4.41    9.33
   4  -2  -5   10.99    3.39
   4   2  -5    9.79    1.17
  -4   2   4  159.61   16.24
  -4   2   4  150.10   18.17
   4  -2  -4  151.46   16.53
   4   2  -4  162.60   16.05
  -4   2   3    2.41    1.50
   4  -2  -3    0.17    2.95
  -4   2   3    0.79    6.52
   4   2  -3    6.00    9.09
   4   2  -2   52.68   10.44
   4  -2  -2   68.07    7.81
  -4   2   2   67.32    9.20
   4   2  -2   73.46    7.23
   4  -2  -2   70.27    7.47
   4  -2  -1  192.15   21.99
  -4   2   1  230.88   22.77
   4   2  -1  204.91   23.22
   4   2  -1  231.09   21.92
   4  -2  -1  224.54   22.18
   4   2   0  132.65   14.49
   4  -2   0  134.75   13.57
  -4   2   0  136.18   14.13
   4   2   0  134.01   13.31
  -4   2   0  131.61   13.37
   4  -2   1  748.52   70.08
  -4   2  -1  727.76   70.03
   4   2   1  708.41   70.37
  -4   2  -1  739.13   70.33
   4  -2   1  684.66   70.03
   4   2   1  626.63   70.37
   4   2   1  689.11   69.99
  -4   2  -2    4.74    3.45
   4   2   2    4.33    3.81
  -4  -2  -2    2.66    0.98
  -4   2  -2    3.03    1.14
   4  -2   2    3.37    1.33
   4   2   2    2.61    0.95
   4   2   2    1.33    4.31
  -4   2  -3  328.33   32.40
   4  -2   3  329.20   32.46
   4  -2   3  317.32   32.08
  -4  -2  -3  333.75   32.06
   4   2   3  326.12   32.44
   4   2   3  310.21   32.04
  -4  -2  -3  316.42   32.63
   4   2   3  332.34   32.42
  -4   2  -4    7.23    3.08
  -4  -2  -4    5.86    1.31
  -4  -2  -4    7.55    3.92
   4   2   4    9.46    3.59
  -4  -2  -5   57.36    7.47
   4   2   5   63.84    7.16
  -4  -2  -6   48.45    6.65
  -4  -2  -7  445.09   42.81
  -4   2  -7  418.55   42.45
  -4   2  -8   11.11    2.14
  -4  -2  -8   10.43    4.80
  -4   2  -9  485.55   46.32
   4   2   9  461.75   46.47
  -4  -2  -9  448.81   46.30
  -4  -2  -9  471.25   46.66
   4   2   9  409.30   48.13
   4   2  10  158.69   24.53
  -4  -2 -10  212.77   21.33
  -4   2 -10  214.24   21.33
  -4  -2 -10  214.20   21.92
  -4  -2 -11    2.13    5.21
  -4   2 -11    3.95    1.90
  -4  -2 -11    1.63    1.97
  -4  -2 -12   48.91    7.82
  -4   2 -12   56.78    5.88
   4   2  12   46.71   14.11
  -4  -2 -12   48.15    5.87
  -4  -2 -13   44.45    7.73
  -4  -2 -13   44.25    5.30
  -4   2 -13   46.06    5.33
   4   2  13   26.02   15.59
  -4  -2 -14   26.96    4.30
   4   2  14   34.76   17.44
  -4   2 -14   32.53    4.23
  -4  -2 -14   40.47    7.35
  -4  -2 -15   25.54    7.51
  -4   2 -15   21.75    3.75
  -4  -2 -15   19.87    3.80
   4   2  15   13.51   19.14
   4   2  16  235.58   34.76
  -4  -2 -16  277.35   27.33
  -4   2 -16  267.30   27.33
  -4  -2 -16  261.46   28.25
  -4  -2 -17    8.89    7.22
  -4  -2 -17    2.46    3.14
  -4   2 -17    0.20    3.24
   4   2  17   16.55   20.53
   4   2  18    5.22   20.30
  -4  -2 -18   12.51    7.84
  -4  -2 -18    8.83    3.60
  -4   2 -18    9.39    3.53
  -4  -2 -19   14.22    8.24
  -4  -2 -19    1.86    3.39
  -4   2 -19    2.44    3.52
   4   2  19   11.02   20.97
  -4  -2 -20   17.87    4.34
  -4   2 -20   18.44    4.43
  -4  -2 -21   -2.31    4.11
  -4   2 -21    2.66    3.97
  -4  -2 -22   44.23    6.81
  -4   2 -22   41.81    6.36
  -4   2 -23   24.61    5.27
  -4  -2 -23   19.98    5.74
  -4   2 -24    1.23    4.93
  -4  -2 -24   -1.56    5.08
   4   3 -24   14.01    9.61
  -4   3  24   16.24   52.10
  -4  -3  24  -26.76   46.12
  -4  -3  23   -8.87   44.31
   4   3 -23    1.48    9.01
  -4   3  23  -19.02   48.36
  -4  -3  22   28.74   43.49
   4   3 -22    8.28    8.26
  -4   3  22  -21.66   45.89
   4   3 -21   23.15    8.72
  -4   3  21  -21.83   45.16
   4   3 -21   38.80    5.30
  -4  -3  21   24.51   41.04
  -4   3  20   12.60   42.69
   4   3 -20   32.74    9.38
  -4  -3  20   63.99   38.81
   4   3 -20   54.50    6.30
   4   3 -19    5.69    6.99
   4   3 -19   10.43    3.10
  -4  -3  19  -24.53   35.55
  -4   3  19    3.01   38.60
  -4   3  18    1.91   37.52
   4   3 -18   11.82    3.15
   4   3 -18   13.79    7.10
  -4  -3  18   21.65   34.66
  -4  -3  17  124.23   37.34
   4   3 -17  126.27   12.65
  -4   3  17  119.53   39.52
   4   3 -17  105.87   14.10
   4  -3 -16   89.65   12.99
   4   3 -16  106.22   10.83
  -4  -3  16   90.79   36.33
  -4   3  16  102.40   37.67
   4  -3 -15    0.66    6.83
  -4  -3  15    5.35   32.32
  -4   3  15   -7.98   35.27
   4   3 -15    2.69    2.34
   4   3 -14   87.05    9.01
   4  -3 -14   82.96   11.03
  -4  -3  14   74.05   30.75
  -4   3  14   58.64   31.44
   4  -3 -13   55.21    8.81
  -4  -3  13   83.06   28.02
  -4   3  13  105.22   29.20
   4   3 -13   61.99    6.58
   4  -3 -12   -2.32    5.65
  -4  -3  12   17.77   25.85
  -4   3  12   21.26   26.50
   4  -3 -11  216.55   24.66
   4   3 -11  243.69   23.89
  -4   3  11  226.75   33.81
  -4  -3  11  220.54   34.29
   4   3 -10   31.71    3.55
  -4  -3  10   32.99   19.91
  -4   3  10   21.50   19.22
   4   3  -9   94.45    9.60
  -4  -3   9   74.10   23.44
   4  -3  -8  184.25   21.53
   4   3  -8  212.48   20.86
  -4  -3   8  253.98   31.04
  -4   3   8  203.33   29.70
   4  -3  -7  161.65   18.85
  -4  -3   7  196.61   25.70
  -4   3   7  183.34   26.17
   4   3  -7  183.96   18.13
   4  -3  -6  451.59   48.12
  -4  -3   6  441.80   50.14
  -4   3   6  501.54   50.35
   4   3  -6  485.40   47.72
   4   3  -5  181.16   17.78
   4  -3  -5  170.85   18.35
  -4   3   5  149.84   20.41
  -4  -3   5  138.68   20.45
   4  -3  -4  718.53   70.02
  -4   3   4  635.30   70.60
   4   3  -4  719.52   69.71
  -4  -3   4  664.42   69.72
  -4  -3   4  625.01   70.54
  -4   3   4  768.10   69.87
   4  -3  -3   14.52    3.75
   4  -3  -3   16.63    9.06
  -4   3   3   20.29    2.73
  -4   3   3   13.04    5.97
   4   3  -3   12.12    8.84
  -4  -3   3   21.77    6.15
  -4  -3   3   19.45    2.57
   4   3  -2  206.20   26.60
   4  -3  -2  251.13   25.74
   4  -3  -2  197.82   26.59
  -4   3   2  286.69   25.84
  -4  -3   2  225.66   26.10
  -4   3   2  255.83   26.16
   4   3  -2  262.93   25.47
   4  -3  -2  257.11   25.61
   4   3  -1   -4.03    5.98
  -4   3   1    0.93    2.98
   4  -3  -1   -0.40    5.68
  -4  -3   1   -2.21    3.85
  -4   3   1    0.09    3.98
   4  -3  -1   -0.51    1.70
   4   3   0   12.12    4.85
  -4   3   0   13.56    2.96
   4  -3   0   14.47    4.92
  -4  -3   0    9.72    3.72
  -4   3   0   12.28    3.74
   4   3   0   12.35    5.65
   4  -3   1  331.30   35.09
   4   3   1  381.50   34.71
  -4  -3  -1  341.41   35.00
  -4   3  -1  350.30   35.04
   4   3   1  329.59   35.28
  -4   3  -1  330.23   34.72
   4   3   1  315.37   35.08
  -4   3  -2  482.69   43.25
  -4   3  -2  432.36   43.49
  -4   3  -2  410.76   43.20
   4   3   2  402.25   43.60
   4   3   2  440.58   43.16
   4   3   2  401.07   43.49
  -4  -3  -2  420.02   43.86
  -4  -3  -2  434.79   43.46
   4  -3   2  433.32   43.51
  -4   3  -3   87.45    7.95
   4   3   3   77.73    7.81
  -4  -3  -3   68.94    9.61
   4  -3   3   76.90    8.75
   4   3   3   80.03    9.21
  -4  -3  -3   66.27    8.41
   4   3   3   73.87    8.77
   4  -3   3   69.70    8.00
  -4   3  -3   76.48    8.46
  -4  -3  -4  442.62   45.88
  -4  -3  -4  446.97   45.37
   4  -3   4  466.25   45.39
   4   3   4  465.33   45.77
  -4  -3  -5  109.14   11.02
  -4  -3  -5  102.14   12.14
   4   3   5  112.04   11.87
   4   3   6   48.48    6.63
  -4  -3  -6   47.78    7.16
  -4   3  -7    7.53    1.86
  -4  -3  -7    5.00    5.31
  -4   3  -8    6.14    1.83
  -4   3  -8    9.73    2.68
  -4   3  -8    3.66    1.70
  -4  -3  -8    1.89    5.10
  -4   3  -9   90.44    8.86
   4  -3   9   61.44   13.37
   4   3   9   52.50   13.66
  -4  -3  -9   85.21   10.30
  -4   3  -9   84.18    8.92
  -4  -3 -10 1247.27  123.61
  -4   3 -10 1256.09  123.20
  -4  -3 -10 1265.69  123.29
  -4   3 -10 1268.22  123.31
   4   3  10 1028.03  124.59
   4  -3  10  963.94  124.40
  -4  -3 -11   28.60    3.61
  -4   3 -11   29.74    4.02
   4  -3  11   14.74   11.48
   4   3  11   29.23   12.70
  -4   3 -11   28.29    3.69
  -4  -3 -11   25.68    6.56
   4   3  12  105.27   18.77
  -4   3 -12  124.60   13.18
   4  -3  12   89.89   18.02
  -4  -3 -12  128.45   13.01
  -4  -3 -12  116.95   14.40
  -4   3 -12  132.78   13.05
  -4  -3 -13  197.16   20.15
  -4   3 -13  207.83   20.17
   4  -3  13  136.48   24.69
  -4  -3 -13  193.65   21.29
   4   3  13  179.54   25.44
  -4   3 -14  194.61   19.33
  -4  -3 -14  191.15   19.30
  -4  -3 -14  180.28   20.59
   4  -3  14  148.66   25.47
   4   3  14  160.71   26.53
   4  -3  15   -6.78   18.34
   4   3  15    7.80   18.99
  -4   3 -15    5.40    2.95
  -4  -3 -15    3.89    2.92
  -4  -3 -15    8.71    7.43
  -4  -3 -16   35.29    8.38
   4   3  16   45.84   20.25
  -4  -3 -16   27.84    4.42
   4  -3  16   10.19   18.90
  -4   3 -16   28.92    4.37
  -4  -3 -17    5.74    7.80
   4   3  17   -3.32   20.67
  -4  -3 -17   -3.49    3.33
   4  -3  17  -15.41   19.07
  -4   3 -17    2.87    3.28
   4  -3  18   -5.95   18.90
  -4  -3 -18   22.89    8.79
   4   3  18   16.29   20.31
  -4  -3 -18   21.99    4.38
  -4   3 -18   18.85    4.17
  -4  -3 -19   -0.89    9.06
  -4   3 -19    0.79    3.65
  -4  -3 -19    2.27    4.25
  -4  -3 -20   22.29    9.93
  -4  -3 -20   30.03    5.33
  -4   3 -20   33.32    5.16
  -4  -3 -21   17.67    4.61
  -4   3 -21   11.24    4.43
  -4  -3 -22    7.77    4.47
  -4   3 -22   11.53    4.57
  -4  -3 -23   -0.43    4.56
  -4   3 -23    0.85    4.50
  -4   4  24   64.75   49.58
   4   4 -24   -1.11    9.39
  -4  -4  24  -12.49   46.05
   4   4 -23   17.72    9.04
  -4   4  23  -48.03   48.07
  -4  -4  23  -48.51   44.53
   4   4 -22    3.89    8.45
  -4  -4  22  -35.15   43.06
  -4   4  22    7.85   44.94
   4   4 -21   -0.97    8.09
  -4  -4  21   54.90   39.22
   4   4 -21    8.93    3.58
  -4   4  21   -8.55   43.24
   4   4 -20   13.23    3.51
  -4  -4  20  -22.82   37.37
  -4   4  20  -13.33   38.73
   4   4 -20    6.46    7.50
  -4  -4  19    5.43   37.24
   4   4 -19   12.83    7.38
  -4   4  19    0.97   37.86
   4   4 -19    9.06    3.08
   4   4 -18  100.01   10.50
  -4   4  18   93.26   37.87
  -4  -4  18   38.01   35.98
   4   4 -17  114.65   11.92
  -4  -4  17   86.98   33.85
  -4   4  17  100.10   37.35
   4   4 -16  199.73   20.13
  -4  -4  16  149.55   38.18
  -4   4  16  152.42   40.42
  -4   4  15   -4.58   30.61
  -4  -4  15   37.07   31.04
   4   4 -15    1.30    2.38
   4   4 -14    3.10    2.24
  -4  -4  14    3.41   27.48
  -4  -4  13   20.93   26.01
  -4   4  13   30.89   28.68
   4   4 -12   98.44   10.13
  -4   4  12  111.62   27.85
  -4  -4  12  109.75   26.16
  -4  -4  11  225.85   33.46
  -4   4  11  207.31   32.70
   4   4 -11  231.86   23.19
  -4   4  10  582.21   64.99
  -4  -4  10  612.09   65.27
   4   4 -10  604.36   60.12
  -4  -4   9  306.86   39.50
  -4   4   9  314.28   40.14
   4   4  -9  321.39   32.03
   4   4  -8    1.17    1.28
  -4  -4   8   10.50   19.31
  -4   4   8   -2.39   21.02
  -4   4   7   -6.66   15.86
   4   4  -7    1.15    1.23
  -4  -4   7   18.78   15.87
   4   4  -6  135.63   13.42
  -4  -4   6   99.91   17.87
  -4   4   6   97.35   17.86
   4   4  -5   44.32    4.53
  -4   4   5   41.37    5.05
  -4  -4   5   41.98    9.78
  -4   4   5   26.66    9.92
  -4   4   4  258.76   31.96
  -4   4   4  329.84   31.09
  -4  -4   4  279.92   32.06
  -4   4   3  757.64   79.62
   4   4  -3  673.36   79.98
  -4  -4   3  707.61   79.61
  -4   4   3  891.31   79.22
   4  -4  -3  719.37   80.04
  -4  -4   2   71.38    9.78
  -4   4   2   90.49    8.88
  -4   4   2   75.80    9.81
   4  -4  -2   57.88   10.82
   4  -4  -2   91.91    9.12
   4   4  -2   68.84   10.98
   4   4  -2   89.01    8.78
  -4   4   1  902.41   76.44
   4  -4  -1  702.20   76.61
  -4  -4   1  719.70   76.45
  -4   4   1  817.23   76.51
   4   4  -1  746.52   76.69
   4  -4  -1  749.61   76.25
   4   4  -1  745.10   76.24
   4  -4   0  200.28   23.02
  -4   4   0  254.91   22.76
  -4   4   0  222.86   22.77
   4   4   0  215.24   23.01
  -4  -4   0  216.38   22.77
  -4   4  -1  203.25   19.91
  -4  -4  -1  193.28   19.90
   4  -4   1  193.65   20.07
   4   4   1  189.74   20.04
   4  -4   1  194.76   19.80
  -4   4  -1  195.48   19.58
   4   4   2    8.70    1.60
   4   4   2    5.58    3.60
   4  -4   2    8.99    3.70
  -4   4  -2   12.76    3.02
  -4  -4  -2    8.66    3.02
   4  -4   2    7.00    2.83
  -4  -4  -2    5.00    6.35
  -4  -4  -3   19.33    3.47
   4   4   3   14.82    4.15
   4  -4   3   15.81    4.07
  -4  -4  -3   15.70    5.91
  -4   4  -3   12.53    3.38
   4  -4   3   11.39    3.13
   4  -4   4   15.63    3.34
  -4  -4  -4   14.52    5.65
  -4  -4  -5   22.31    6.28
  -4   4  -6  168.00   15.38
  -4  -4  -6  136.74   16.58
  -4   4  -6  142.33   15.24
  -4   4  -7  191.61   17.52
  -4  -4  -7  164.51   18.57
  -4   4  -7  161.52   17.37
  -4  -4  -8  250.71   25.63
   4   4   8  201.07   26.98
   4  -4   8  201.99   26.67
  -4   4  -8  267.59   24.91
  -4   4  -8  241.80   24.80
  -4   4  -9   30.37    4.78
   4   4   9   46.89   11.29
   4  -4   9   17.39   10.31
  -4   4  -9   35.86    4.01
  -4  -4  -9   31.77    6.94
  -4  -4 -10   56.58    6.25
  -4   4 -10   53.35    7.00
  -4   4 -10   62.45    6.30
   4   4  10   44.62   12.56
   4  -4  10   34.89   12.09
  -4  -4 -10   61.90    8.73
   4  -4  11   -9.99   12.44
   4   4  11   -8.20   12.53
  -4  -4 -11    3.58    6.67
  -4  -4 -11    0.65    2.10
  -4   4 -11   -1.34    2.12
  -4   4 -11    1.69    4.15
  -4   4 -11   -0.08    2.44
   4  -4  12   -0.33   13.32
  -4  -4 -12   26.71    3.49
  -4   4 -12   21.42    3.74
  -4   4 -12   20.23    3.33
   4   4  12    5.74   13.68
  -4  -4 -12   19.82    7.57
  -4  -4 -13  166.56   15.33
   4  -4  13   97.40   21.33
  -4   4 -13  144.16   15.38
   4   4  13  124.45   22.48
  -4   4 -13  140.53   15.29
  -4  -4 -13  151.11   17.05
  -4   4 -14   38.25    5.72
   4  -4  14   29.65   15.85
   4   4  14   16.03   17.54
  -4  -4 -14   36.33    5.00
  -4   4 -14   42.49    5.01
  -4  -4 -14   41.09    9.07
  -4   4 -15  248.18   25.50
  -4  -4 -15  263.47   25.43
   4   4  15  188.21   32.07
  -4  -4 -15  251.54   26.84
  -4   4 -15  249.19   25.40
   4  -4  15  186.65   30.84
  -4  -4 -16  110.60   15.40
   4   4  16  109.89   23.17
   4  -4  16   82.53   21.56
  -4   4 -16  127.97   13.16
  -4  -4 -16  128.57   13.16
  -4  -4 -17   13.92    8.69
   4   4  17    7.16   19.51
   4  -4  17  -13.54   18.12
  -4  -4 -17    4.13    3.32
  -4   4 -17    9.61    3.43
  -4  -4 -18    1.29    8.82
  -4  -4 -18    0.86    3.47
   4  -4  18   15.88   18.42
  -4   4 -18    4.29    3.37
   4   4  18  -14.52   21.08
  -4  -4 -19    3.30    3.64
  -4   4 -19    1.77    3.68
  -4  -4 -19    0.39    9.50
  -4   4 -20   13.52    4.23
  -4  -4 -20   15.30    9.87
  -4   4 -21    4.48    4.26
  -4   4 -22   47.84    6.76
  -4   4 -23   17.00    5.04
   4   5 -24   -1.78    9.28
   4   5 -23   24.98    9.38
  -4  -5  23   14.81   42.20
  -4   5  23   67.05   46.70
   4   5 -22   14.55    8.67
  -4  -5  22   44.44   40.41
  -4   5  22   96.84   43.27
   4   5 -21   23.05    8.60
  -4  -5  21   14.44   37.73
  -4   5  21    6.27   41.19
   4   5 -20    2.15    7.90
  -4  -5  20  -16.48   37.66
  -4   5  20    1.98   40.13
   4   5 -20   -2.47    3.39
  -4  -5  19   14.89   35.01
  -4   5  19   25.42   38.08
   4   5 -19   17.66    3.71
  -4  -5  18   28.91   33.34
  -4   5  18    7.06   35.43
   4   5 -18   22.25    3.82
  -4  -5  17   28.97   32.26
  -4   5  17  -13.29   32.57
   4   5 -17    1.60    2.56
  -4  -5  16    9.69   30.42
  -4   5  16   27.96   31.35
   4   5 -16   14.43    3.00
  -4  -5  15   -6.27   28.66
  -4   5  15   16.02   29.92
   4   5 -15    7.36    2.68
  -4  -5  14   28.72   28.12
  -4   5  14  -14.74   28.33
   4   5 -14    5.84    2.28
  -4  -5  13   57.63   26.43
  -4   5  13   52.96   26.79
   4   5 -13   54.08    5.98
  -4  -5  12    6.24   23.38
  -4   5  12   22.74   24.13
   4   5 -12   35.76    4.19
  -4  -5  11    4.80   21.31
   4   5 -11    2.76    1.76
  -4   5  11  -27.31   21.60
   4   5 -10   21.43    2.77
  -4  -5  10   48.35   21.17
  -4   5  10   23.63   19.98
  -4  -5   9  198.11   29.21
  -4   5   9  202.21   28.47
   4   5  -9  191.58   19.25
  -4  -5   8   61.11   19.06
   4   5  -8   64.87    6.74
  -4   5   8   75.41   19.01
   4   5  -7  150.18   15.08
  -4  -5   7  143.27   20.60
  -4   5   7  148.34   20.34
   4   5  -6  369.56   36.12
  -4  -5   6  299.65   37.98
  -4   5   6  324.78   38.25
   4   5  -5  253.05   24.56
  -4  -5   5  216.45   26.24
  -4   5   5  224.92   26.24
  -4   5   5  239.24   24.78
  -4   5   4   55.50    5.88
  -4  -5   4   35.68    8.12
  -4   5   4   46.55    8.62
  -4  -5   3   30.10    5.11
   4   5  -3   52.05   10.53
  -4  -5   3   51.06    7.39
  -4   5   3   55.79    7.10
   4  -5  -3   43.75   10.61
  -4   5   3   62.71    5.34
  -4   5   2   69.08    6.89
  -4  -5   2   60.25    7.93
  -4   5   2   54.52    7.97
   4   5  -2   51.61    9.13
   4  -5  -2   47.62    9.44
   4   5  -2   67.93    6.85
  -4  -5   1   33.67    5.45
   4   5  -1   34.13    6.84
   4  -5  -1   46.86    7.01
  -4   5   1   40.23    5.78
   4   5  -1   43.60    4.64
   4   5   0  149.80   16.30
   4  -5   0  144.84   16.13
  -4   5   0  163.22   15.80
   4  -5   0  152.81   15.88
  -4  -5   0  150.01   15.77
  -4  -5  -1   99.30   10.06
   4   5   1   96.29   10.48
   4  -5   1   95.24   10.50
   4  -5   1   88.53   10.19
  -4   5  -1   91.94   10.14
  -4   5  -2   96.84   10.14
   4   5   2   93.29   10.36
  -4  -5  -2  102.42   10.20
   4  -5   2   91.28   10.46
  -4  -5  -2   91.96   12.19
   4  -5   2   92.34   10.30
   4   5   3   93.18   10.72
  -4   5  -3   96.97   10.51
  -4  -5  -3  100.51   10.61
   4  -5   3   99.52   10.77
  -4  -5  -3  113.63   12.40
   4  -5   3  104.03   10.84
  -4  -5  -4  184.87   19.86
   4  -5   4  184.58   18.99
  -4  -5  -5   93.41   11.28
   4  -5   5   80.39   10.34
  -4   5  -5   96.80    9.93
  -4   5  -6   39.57    4.74
  -4  -5  -6   45.48    7.96
  -4   5  -6   50.87    5.78
  -4   5  -7    3.72    1.81
  -4  -5  -7    0.28    6.91
  -4   5  -7    5.88    3.83
   4   5   8  169.46   22.83
  -4   5  -8  229.46   20.57
  -4  -5  -8  202.79   21.51
  -4   5  -8  196.58   20.24
   4  -5   8  146.81   22.26
  -4  -5  -9  274.24   28.32
   4   5   9  201.38   29.51
  -4   5  -9  273.59   27.21
  -4   5  -9  291.07   27.42
   4  -5   9  214.21   29.18
  -4   5 -10  321.16   30.59
   4   5  10  241.03   33.05
  -4  -5 -10  303.26   31.59
  -4   5 -10  307.50   30.72
   4  -5  10  223.39   32.76
  -4   5 -11   13.52    2.69
  -4  -5 -11    8.09    7.42
   4  -5  11    2.66   11.42
   4   5  11   -2.62   12.75
  -4   5 -11   10.44    4.61
   4   5  12   17.65   14.28
  -4   5 -12   32.15    6.27
   4  -5  12   24.68   13.28
  -4  -5 -12   37.75    8.64
  -4   5 -12   40.29    4.64
  -4   5 -13   21.88    4.03
  -4  -5 -13   28.74    8.74
  -4   5 -13   16.07    5.76
   4   5  13   33.14   15.84
   4  -5  13   13.30   14.67
  -4   5 -13   22.13    3.52
   4  -5  14   58.68   18.23
   4   5  14   53.59   19.50
  -4   5 -14   73.43    8.51
  -4   5 -14   75.84    8.25
  -4  -5 -14   82.82   11.93
   4  -5  15    0.87   16.12
   4   5  15  -14.08   18.55
  -4   5 -15   16.67    3.47
  -4   5 -15   15.54    4.48
  -4  -5 -15   17.00    8.94
   4  -5  16   -6.50   17.30
   4   5  16    7.23   19.49
  -4   5 -16   17.13    4.81
  -4   5 -16   24.04    3.84
  -4  -5 -16   10.29    8.98
   4  -5  17    3.92   16.82
  -4   5 -17    2.61    3.30
   4   5  17  -20.19   19.50
  -4  -5 -17    9.19    9.20
  -4  -5 -18   25.12   10.01
  -4   5 -18   16.07    3.97
  -4   5 -19  160.27   16.78
  -4  -5 -19  158.34   19.42
  -4   5 -20   22.94    4.82
  -4  -5 -20   22.71   10.92
  -4   5 -21   -1.35    4.11
  -4   5 -22   -4.31    4.77
  -4   5 -23   -3.00    4.68
  -4  -6  23   -1.03   42.06
   4   6 -23   30.11    9.87
  -4   6  23   72.80   46.34
   4   6 -22   19.16    9.18
  -4  -6  22   33.68   39.51
  -4   6  22   47.61   43.97
   4   6 -21   20.14    8.63
  -4  -6  21   16.87   37.78
  -4  -6  20  -15.97   35.27
  -4   6  20  -30.47   38.98
   4   6 -20    8.53    3.58
  -4  -6  19  -11.01   33.21
   4   6 -19    4.30    3.30
  -4   6  19   19.64   36.76
  -4  -6  18   -3.18   31.99
  -4   6  18  -35.34   33.98
   4   6 -18    2.46    2.90
   4   6 -17  183.73   18.65
  -4  -6  17  154.10   37.24
  -4   6  17  145.89   38.34
  -4  -6  16  176.34   41.43
  -4   6  16  225.42   42.56
   4   6 -16  290.38   28.82
   4   6 -15  131.43   13.46
  -4  -6  15   82.58   31.43
  -4   6  15  104.26   32.08
  -4  -6  14   64.21   26.85
  -4   6  14   19.08   27.53
   4   6 -14   48.79    5.62
  -4  -6  13   45.30   25.57
  -4   6  13   31.10   24.97
   4   6 -13   32.74    4.16
  -4  -6  12   51.27   25.03
  -4   6  12   99.85   25.67
   4   6 -12   71.68    7.66
   4   6 -11   28.34    3.60
  -4  -6  11   37.49   22.94
  -4   6  11   21.34   22.83
   4   6 -10   12.81    2.20
  -4  -6  10    5.82   22.78
  -4   6  10   13.02   21.23
   4   6  -9   51.58    5.56
  -4  -6   9   67.64   20.82
  -4   6   9   42.72   19.53
   4   6  -8   37.65    4.22
  -4  -6   8   33.54   14.57
  -4   6   8   30.49   15.27
   4   6  -7  363.42   35.50
  -4   6   7  289.02   37.95
  -4  -6   7  315.88   37.83
   4   6  -6   45.76    4.81
  -4  -6   6   28.77    9.92
  -4   6   6   42.73    5.43
  -4   6   6   40.36    9.91
  -4   6   5   78.40    8.04
  -4  -6   5   62.30   10.45
  -4   6   5   61.51   10.63
  -4   6   4  527.18   58.96
  -4  -6   4  540.43   58.97
  -4   6   4  634.36   58.55
   4   6  -3  137.22   18.28
  -4  -6   3  115.14   14.71
  -4   6   3  128.81   14.81
  -4   6   3  161.98   14.14
  -4   6   2    5.80    2.40
   4  -6  -2    2.96    4.36
   4   6  -2    1.28    2.03
  -4  -6   2    2.33    3.92
  -4   6   2    1.49    4.03
   4   6  -2    2.72    7.07
  -4  -6   1  455.70   48.08
   4   6  -1  425.75   48.39
  -4   6   1  506.94   48.14
   4   6  -1  504.77   48.00
   4  -6  -1  482.03   48.26
  -4  -6   0  418.22   40.57
  -4   6   0  426.65   40.61
   4   6   0  396.67   40.85
   4  -6   0  380.72   40.73
   4   6   0  395.31   40.50
  -4  -6  -1   24.33    3.98
  -4   6  -1   13.08    3.45
   4   6   1   15.34    4.65
   4  -6   1    6.00    4.41
  -4   6  -2  163.90   16.43
   4   6   2  151.76   16.62
   4  -6   2  157.02   16.77
  -4  -6  -2  164.16   16.43
  -4  -6  -3   11.53    7.40
  -4   6  -3    1.34    3.03
   4   6   3    0.88    3.77
   4  -6   3    2.43    4.52
   4  -6   3    8.00    3.91
   4  -6   4  179.28   19.14
  -4  -6  -4  192.69   20.19
  -4   6  -5  226.99   24.00
   4  -6   5  236.38   24.77
  -4  -6  -5  219.39   25.20
  -4   6  -5  280.20   24.44
  -4   6  -6  181.06   18.44
  -4  -6  -6  164.82   19.93
  -4   6  -6  194.65   18.96
  -4   6  -7  115.95   12.26
   4   6   7  112.83   15.12
  -4   6  -7  141.71   13.06
  -4  -6  -7  103.81   14.41
  -4   6  -8  143.90   13.09
   4   6   8   80.14   15.65
  -4  -6  -8  104.66   14.29
   4  -6   8   80.50   15.18
  -4   6  -8  122.31   12.30
   4  -6   9  292.09   42.13
  -4   6  -9  450.38   41.04
   4   6   9  333.02   42.64
  -4  -6  -9  422.04   41.85
  -4   6  -9  413.30   40.76
  -4   6 -10    2.75    2.25
  -4   6 -10   -1.29    4.96
   4  -6  10  -13.38   10.34
   4   6  10   16.02   11.47
  -4  -6 -10    1.35    7.71
  -4   6 -11    7.19    2.46
  -4   6 -11   -0.28    5.00
  -4  -6 -11    5.96    8.08
   4   6  11   -5.54   12.88
   4  -6  11   -5.54   11.34
   4   6  12   38.74   14.74
  -4  -6 -12   23.07    8.73
  -4   6 -12   20.29    3.43
   4  -6  12   31.60   13.14
  -4   6 -12   11.17    5.56
  -4   6 -13   17.06    3.27
  -4  -6 -13    2.71    8.93
   4   6  13   -2.85   16.18
  -4   6 -13    6.75    5.52
   4  -6  13   10.16   14.39
   4  -6  14   15.17   15.68
   4   6  14   -3.14   16.40
  -4  -6 -14   -2.43    9.22
  -4   6 -14    5.09    3.02
   4   6  15   19.15   18.75
   4  -6  15   39.62   16.24
  -4   6 -15   54.37    6.50
  -4   6 -15   47.49    6.11
  -4  -6 -15   51.00   10.56
   4   6  16    5.07   18.26
   4  -6  16    0.90   16.02
  -4   6 -16    4.78    3.31
  -4  -6 -16   12.62    9.15
  -4   6 -17   60.34    6.94
   4   6  17   24.69   20.00
   4  -6  17   38.21   18.36
  -4  -6 -17   48.05   11.63
  -4   6 -18   34.93    5.03
  -4  -6 -18   20.91   10.74
  -4   6 -19   13.10    4.24
  -4  -6 -19   15.57   10.86
  -4   6 -20   -1.03    3.94
  -4  -6 -20    1.67   10.99
  -4   6 -21    2.04    4.13
  -4  -6 -21   -6.67   11.40
  -4   6 -22    9.54    4.75
  -4   6 -23    6.75    4.95
  -4  -7  23   37.89   42.30
   4   7 -23   29.72   10.15
  -4   7  23   -1.10   43.21
   4   7 -22    0.44    9.01
  -4  -7  22   -7.88   38.65
  -4  -7  21   24.89   37.87
  -4   7  21  117.81   40.76
  -4  -7  20   30.20   35.04
  -4   7  20    1.82   36.57
  -4  -7  19   -5.75   32.81
  -4   7  19    9.47   34.00
   4   7 -19    3.40    3.21
   4   7 -18   46.70    5.99
  -4  -7  18   23.34   32.50
  -4  -7  17   10.26   30.00
  -4   7  17  -12.07   30.91
   4   7 -17    8.95    3.04
   4   7 -16   42.05    5.16
  -4   7  16    2.80   28.63
  -4  -7  16   18.53   29.06
  -4   7  15  122.15   30.26
  -4  -7  15   69.71   30.01
   4   7 -15  121.25   12.50
  -4  -7  14   19.09   27.19
  -4   7  14   22.73   26.20
   4   7 -14    8.99    2.80
  -4  -7  13   37.65   27.16
  -4   7  13   94.90   27.03
   4   7 -13   79.91    8.46
  -4  -7  12  112.92   29.20
  -4   7  12  129.81   26.94
   4   7 -12  111.80   11.57
  -4   7  11  201.40   31.46
  -4  -7  11  157.49   30.63
   4   7 -11  179.72   18.19
  -4   7  10   80.54   22.26
  -4  -7  10  112.81   24.60
   4   7 -10   80.32    8.46
   4   7  -9    1.62    1.91
  -4   7   9   19.04   15.79
  -4  -7   9    9.55   16.07
  -4   7   8   -0.28   11.70
   4   7  -8    1.22    1.85
  -4  -7   8   -1.75   12.66
   4   7  -7  105.93    9.74
  -4  -7   7   83.09   13.91
  -4   7   7   69.97   13.54
  -4   7   7   78.71   10.00
   4   7  -6  103.85    9.79
  -4   7   6   62.90   12.30
  -4  -7   6   76.51   12.92
  -4   7   6   88.63   10.04
  -4  -7   5  114.86   14.76
  -4   7   5  139.07   13.43
  -4   7   5  110.59   14.75
   4  -7  -4    0.24    5.05
  -4  -7   4   -0.91    5.51
  -4   7   4    1.20    2.72
  -4   7   4   -4.74    5.48
   4  -7  -3   54.01    7.92
  -4   7   3   47.88    7.53
  -4  -7   3   59.85    7.70
   4   7  -3   37.43   11.17
  -4   7   3   66.27    6.66
  -4  -7   2   45.53    6.58
   4  -7  -2   50.42    7.41
  -4   7   2   48.02    6.74
   4   7  -2   25.93    9.10
  -4   7   2   56.27    6.10
   4   7  -2   62.05    6.05
   4  -7  -1   67.53    8.82
  -4  -7   1   65.80    7.76
  -4   7   1   69.37    7.81
   4   7  -1   73.59    7.53
   4  -7  -1   74.97    9.13
   4   7  -1   58.30    9.03
  -4  -7   0  110.69   11.40
  -4   7   0  114.07   11.43
  -4  -7   0  125.93   14.82
   4   7   0  104.79   12.15
   4  -7   0  108.85   12.16
   4  -7   0  109.55   12.19
   4   7   0  101.07   11.27
   4   7   1  294.00   30.15
   4  -7   1  288.37   30.09
  -4   7  -1  323.57   29.94
   4  -7   1  306.18   30.28
  -4  -7  -1  323.30   29.92
   4   7   1  257.73   29.86
  -4   7  -2   17.25    3.31
  -4  -7  -2   16.72    3.37
   4  -7   2   13.88    5.23
   4   7   2   21.86    4.40
   4   7   3  943.01   98.08
  -4  -7  -3 1070.93   98.84
   4  -7   3 1005.46   98.28
  -4  -7  -4    4.13    7.68
   4  -7   4    9.51    5.64
   4  -7   5   -2.50    6.14
  -4  -7  -5   -0.17    7.51
  -4   7  -5    2.20    2.25
  -4   7  -6    4.28    2.12
  -4  -7  -6    6.85    7.19
   4   7   7    7.26    8.67
   4  -7   7    8.58    7.76
  -4   7  -7    4.73    2.25
  -4  -7  -7    3.90    7.63
  -4   7  -7   10.33    5.61
  -4   7  -8  290.10   28.38
  -4  -7  -8  276.98   29.84
  -4   7  -8  322.25   28.93
   4   7   8  231.62   30.49
   4  -7   8  200.26   29.88
   4  -7   9    3.58    9.28
  -4   7  -9    3.00    2.34
  -4   7  -9   -2.21    5.90
  -4  -7  -9    1.31    8.32
   4   7   9   -7.73   11.18
   4   7  10   -4.96   11.28
   4  -7  10    0.26   11.05
  -4   7 -10    0.44    2.31
  -4  -7 -10   -7.14    8.68
  -4   7 -11    3.36    2.56
  -4  -7 -11    9.80    9.03
   4  -7  11    5.49   12.12
   4   7  11   -1.62   12.46
  -4   7 -12    4.89    2.84
   4  -7  12    7.49   12.92
   4   7  12    2.19   14.50
  -4  -7 -12  -10.40    8.84
  -4   7 -13   45.83    5.48
   4   7  13   41.56   17.60
   4  -7  13   25.75   15.08
  -4  -7 -13   34.97   10.59
  -4   7 -14   41.77    5.24
   4  -7  14    7.01   15.39
   4   7  14   35.44   16.83
  -4  -7 -14   32.23   10.24
   4  -7  15   26.18   14.98
  -4  -7 -15    7.24    9.82
   4   7  15  -13.05   16.45
  -4   7 -15    0.59    3.09
  -4   7 -16   38.02    5.13
  -4  -7 -16   33.72   10.71
   4   7  16   -2.97   18.08
   4  -7  16   20.21   16.63
  -4   7 -17    3.70    3.51
  -4  -7 -17   11.19    9.96
  -4   7 -18   -3.94    3.79
  -4  -7 -18   -9.23   10.66
  -4   7 -19  122.77   13.36
  -4  -7 -19  129.24   17.40
  -4   7 -20    9.26    4.17
  -4  -7 -20   -8.64   11.57
  -4   7 -21    6.99    4.49
  -4  -7 -21    8.94   11.60
  -4   7 -22    2.94    4.75
  -4   8  22  -75.73   41.91
  -4  -8  22  -20.83   42.47
  -4  -8  21   33.09   37.75
  -4   8  21   -4.79   38.91
  -4  -8  20   -0.88   35.74
  -4   8  20   -2.64   35.37
  -4  -8  19  -19.11   33.50
  -4   8  19   15.71   34.00
   4   8 -19   13.48    3.86
   4   8 -18    1.45    3.14
  -4  -8  18  -24.33   32.08
  -4   8  18  -12.37   30.85
  -4  -8  17   13.26   29.44
  -4   8  17   12.93   30.29
   4   8 -17   17.45    3.66
   4   8 -16   59.99    6.89
  -4  -8  16   43.34   29.24
  -4   8  16   76.38   29.57
  -4   8  15  -21.95   28.01
  -4  -8  15   -7.24   26.58
   4   8 -15    2.54    2.90
   4   8 -14    2.89    2.81
  -4  -8  14   14.42   25.94
  -4   8  14   13.98   25.96
  -4  -8  13   12.97   27.53
   4   8 -13   14.19    2.96
  -4   8  13   -3.56   26.77
   4   8 -12  222.80   22.24
  -4  -8  12  195.92   35.12
  -4   8  12  138.24   33.85
  -4  -8  11   30.53   22.83
   4   8 -11   34.15    4.33
  -4   8  11    3.89   22.80
   4   8 -10    6.19    2.42
  -4   8  10    8.68   16.95
  -4  -8  10   10.03   18.05
   4   8  -9   13.83    2.82
  -4  -8   9   -5.02   13.95
  -4   8   9    9.89   13.14
  -4  -8   8   -5.01   11.34
   4   8  -8    6.46    2.46
  -4   8   8    8.92   11.03
  -4   8   8    8.05    3.11
  -4  -8   7  441.41   54.92
  -4   8   7  420.24   54.78
  -4   8   7  469.62   53.92
   4  -8  -6   35.03    7.31
  -4   8   6   32.52    4.98
  -4  -8   6   39.43    8.17
  -4   8   6   26.22    8.15
   4   8  -6   45.87    4.67
   4  -8  -5   11.10    5.67
  -4   8   5    8.48    2.86
  -4   8   5   -0.62    6.17
  -4  -8   5    4.85    6.23
   4  -8  -4   10.61    5.56
  -4  -8   4   12.07    5.16
  -4   8   4   13.18    3.05
  -4   8   4    8.00    4.98
   4  -8  -3   -0.87    5.39
  -4  -8   3    0.15    3.85
  -4   8   3    0.98    4.00
   4  -8  -3   -0.14    8.10
   4   8  -3    4.51    7.35
  -4   8   3    3.12    2.96
   4  -8  -2   54.78    8.53
  -4  -8   2   55.17    7.31
  -4   8   2   62.26    7.53
   4  -8  -2   57.17   11.79
   4   8  -2   46.59   10.62
  -4   8   2   69.27    7.27
   4   8  -2   77.21    7.20
   4   8  -1   18.94    3.11
  -4  -8   1   19.04    3.35
  -4   8   1   19.68    3.62
   4  -8  -1    6.93    6.01
   4   8  -1   11.33    5.77
   4  -8  -1   14.53    5.74
  -4   8   0  132.14   12.99
  -4  -8   0  135.18   12.97
   4  -8   0   99.64   13.64
   4   8   0  108.76   13.60
  -4  -8   0  166.01   16.72
   4  -8   0  131.59   13.89
   4   8   0  121.14   12.94
  -4   8  -1  237.03   22.96
   4  -8   1  197.53   23.27
   4  -8   1  243.16   23.74
   4   8   1  219.02   23.28
  -4  -8  -1  255.45   22.98
   4   8   1  204.36   23.01
   4   8   2   64.17    7.98
   4  -8   2   66.17    7.96
   4  -8   2   64.48    8.81
  -4   8  -2   68.34    7.27
   4  -8   3   40.26    5.15
   4   8   3   28.34    5.04
   4  -8   3   31.89    6.63
  -4   8  -4  243.77   24.25
  -4  -8  -4  241.60   25.93
   4  -8   4  228.63   25.01
   4  -8   5  282.32   29.75
  -4   8  -5  289.20   28.72
  -4  -8  -5  271.32   30.11
   4  -8   6   14.87    6.98
  -4   8  -6   11.93    2.87
   4  -8   6   19.41    7.82
   4   8   6   10.48    7.62
  -4  -8  -6    6.10    7.93
   4  -8   7   62.88   12.45
   4   8   7   77.40   12.80
  -4   8  -7   93.74    9.43
  -4  -8  -7   90.57   12.70
  -4   8  -8  172.78   16.19
   4   8   8  116.59   19.08
  -4  -8  -8  151.09   18.63
   4  -8   8  113.70   18.38
  -4   8  -9  256.63   23.98
   4   8   9  179.74   26.45
  -4  -8  -9  247.67   25.80
   4  -8   9  164.33   26.04
  -4   8 -10   43.14    4.96
   4   8  10   22.69   12.46
   4  -8  10   16.76   10.76
  -4  -8 -10   31.74   10.86
   4  -8  11   16.84   12.54
  -4   8 -11   29.02    4.14
   4   8  11   21.65   12.99
  -4  -8 -11   27.37   10.40
  -4   8 -12   34.46    4.68
   4   8  12   21.81   14.81
   4  -8  12   31.01   13.66
  -4  -8 -12   30.08   10.21
   4   8  13   65.11   17.28
   4  -8  13   41.07   16.05
  -4   8 -13   81.67    8.66
  -4  -8 -13   78.60   12.77
  -4   8 -14   11.52    3.32
   4  -8  14   18.92   14.35
   4   8  14   21.94   15.72
  -4  -8 -14    5.76   10.07
   4   8  15   12.54   16.72
  -4   8 -15   30.01    4.69
   4  -8  15   21.68   14.71
  -4  -8 -15   32.59   10.60
  -4   8 -16    4.04    3.57
  -4  -8 -16    4.34   10.50
  -4   8 -17   79.74    8.96
  -4  -8 -17   65.82   13.73
  -4   8 -18   48.63    6.53
  -4  -8 -18   45.91   12.48
  -4   8 -19   14.47    4.35
  -4  -8 -19   -1.32   11.92
  -4   8 -20    4.51    4.20
  -4  -8 -20   -9.03   12.16
  -4  -8 -21   16.14   12.20
  -4   8 -21    2.57    4.60
  -4   8 -22   22.25    5.41
   4  -9 -22  -13.24   11.54
  -4  -9  22   63.08   43.75
  -4   9  22   -7.23   41.36
   4  -9 -21    9.27   10.96
  -4   9  21  -42.01   40.87
  -4  -9  21   17.35   40.06
  -4  -9  20   31.15   37.96
  -4   9  20   17.68   35.43
  -4  -9  19  114.41   36.58
  -4   9  19   47.99   35.03
  -4   9  18   55.45   31.67
  -4  -9  18   75.06   34.42
   4   9 -18   37.39    5.28
  -4  -9  17  -29.02   33.18
  -4   9  17    8.16   32.00
   4   9 -17   12.08    3.42
  -4   9  16  -12.28   28.49
  -4  -9  16   25.87   32.06
   4   9 -16   16.98    3.77
   4   9 -15    0.58    2.78
  -4  -9  15   -0.69   29.03
  -4   9  15    7.13   26.07
   4   9 -14   -4.67    2.90
  -4  -9  14   27.82   26.67
  -4   9  14   -0.61   26.27
  -4  -9  13   31.70   25.98
   4   9 -13   45.99    5.61
  -4   9  13   69.05   25.80
   4   9 -12    1.77    2.71
  -4  -9  12    8.98   23.84
  -4   9  12  -19.99   21.35
   4   9 -11   20.20    3.47
  -4  -9  11   29.12   18.85
   4  -9 -10   -9.49    7.70
   4   9 -10   -2.03    2.71
  -4   9  10  -11.17   14.72
  -4  -9  10    1.62   15.52
   4  -9  -9   55.74   10.18
   4   9  -9   78.02    7.28
  -4   9   9   63.26   14.19
  -4  -9   9   50.63   14.96
  -4   9   9   51.23    7.54
   4  -9  -8   15.52    7.29
   4   9  -8   17.85    3.04
  -4   9   8   12.61    9.27
  -4   9   8   11.57    3.69
  -4  -9   8   -0.63   10.55
  -4  -9   7   31.02    9.41
   4   9  -7   52.13    5.02
  -4   9   7   30.77    8.92
  -4   9   7   26.54    5.23
   4  -9  -7   50.11    8.24
  -4  -9   6  214.10   25.34
  -4   9   6  194.95   25.24
   4  -9  -6  271.74   25.51
  -4   9   6  262.31   24.54
   4  -9  -5    0.60    6.22
  -4  -9   5   -4.63    5.80
  -4   9   5    2.33    5.55
  -4   9   5   -0.35    3.05
   4  -9  -4   55.55    8.42
  -4  -9   4   49.93    7.20
  -4   9   4   44.91    7.08
  -4   9   4   65.01    6.58
  -4  -9   3   70.55    8.25
  -4   9   3   81.30    8.19
  -4   9   3   67.41    8.28
   4  -9  -3   69.31    9.59
  -4   9   2   80.96    8.94
  -4  -9   2   77.92    8.88
   4   9  -2   56.87   10.80
   4  -9  -2   64.46   11.64
   4   9  -2  100.51    9.00
   4  -9  -2   81.74   10.58
  -4  -9   1   27.82    3.74
   4   9  -1   28.96    3.82
  -4   9   1   20.84    3.85
   4  -9  -1   12.66    7.24
   4   9  -1   14.09    6.46
   4  -9  -1   26.95    6.53
   4   9   0   57.80    9.06
  -4  -9   0  100.86   13.69
  -4  -9   0   83.51    8.20
  -4   9   0   80.74    8.24
   4  -9   0   43.95    9.26
   4   9   0   82.15    8.41
   4  -9   0   83.57    9.81
   4  -9   1    3.74    4.69
  -4   9  -1    2.05    2.44
   4   9   1    3.55    4.51
  -4  -9  -1    4.18    2.55
   4  -9   1   10.34    6.21
   4   9   1    2.63    2.70
   4  -9   2   84.54    9.81
   4   9   2   72.53    8.06
   4  -9   2   67.43    8.04
   4   9   2   60.76    7.54
   4  -9   3  467.76   46.03
   4   9   3  447.70   45.47
   4  -9   3  453.08   45.47
  -4  -9  -4   17.23    9.43
  -4   9  -4   22.80    3.72
   4  -9   4   22.68    7.55
   4   9   5   32.12    8.52
  -4   9  -5   58.86    5.94
  -4  -9  -5   46.97   10.44
   4  -9   5   34.72    8.31
   4  -9   5   39.44    9.43
  -4   9  -6  124.42   11.68
   4  -9   6   88.48   13.69
   4   9   6   80.43   13.98
   4  -9   6  105.95   14.67
  -4  -9  -6  101.71   14.83
   4  -9   7   16.82    8.09
   4   9   7   14.57    9.04
  -4  -9  -7    8.77    9.23
  -4   9  -7   17.29    3.36
   4   9   8   16.29    9.91
  -4  -9  -8   30.98   10.05
  -4   9  -8   34.25    4.41
   4  -9   8   15.77    8.98
   4   9   9    5.76   10.80
  -4   9  -9    3.98    2.79
   4  -9   9   -6.41    9.36
  -4  -9  -9   -5.94   10.11
   4  -9  10   52.36   13.63
   4   9  10   47.57   14.35
  -4   9 -10   78.06    8.26
  -4  -9 -10   80.65   12.90
   4   9  11   24.41   13.96
  -4   9 -11   22.74    4.15
   4  -9  11   38.09   12.33
  -4  -9 -11   30.00   11.25
   4  -9  12   50.44   13.59
  -4   9 -12   45.72    5.69
   4   9  12   30.28   14.97
  -4  -9 -12   34.47   11.27
  -4   9 -13   43.75    5.54
   4   9  13   26.61   14.84
  -4  -9 -13   38.93   11.06
   4  -9  13   25.01   13.80
   4   9  14   10.39   15.26
   4  -9  14   31.37   14.32
  -4   9 -14   37.05    4.97
  -4  -9 -14   18.10   11.73
  -4   9 -15    2.52    3.43
  -4  -9 -15    1.80   10.70
  -4   9 -16    1.16    3.55
  -4  -9 -16    7.46   11.37
  -4  -9 -17   32.34   12.48
  -4   9 -17   27.81    4.95
  -4   9 -18   -0.38    3.93
  -4  -9 -18    1.12   12.01
  -4   9 -19   13.07    4.51
  -4  -9 -19   15.00   12.61
  -4   9 -20    1.52    4.39
  -4  -9 -20   13.06   13.09
  -4   9 -21    2.88    4.56
  -4  -9 -21    4.89   12.88
   4 -10 -21   14.31   11.26
  -4 -10  21   21.48   40.30
  -4  10  21   48.76   40.35
   4 -10 -20   38.86   11.89
  -4  10  20   27.32   35.46
  -4 -10  20   -2.77   39.14
  -4  10  19   22.20   33.30
  -4 -10  19   20.06   36.64
   4 -10 -19    0.54   10.69
   4 -10 -18   16.15   10.73
  -4  10  18   12.41   33.12
  -4 -10  18  -26.19   33.54
   4 -10 -17    4.88    9.94
  -4 -10  17   38.11   32.73
  -4  10  17  -15.74   29.37
   4  10 -17   -0.78    3.57
   4  10 -16    3.65    3.25
   4 -10 -16   14.17    9.69
  -4  10  16   33.42   28.88
  -4 -10  16   22.33   31.05
   4 -10 -15   97.02   16.21
   4  10 -15  133.76   13.31
  -4 -10  15  140.79   32.31
   4 -10 -14   17.71    9.68
   4  10 -14   25.90    3.97
  -4 -10  14   29.81   24.63
  -4  10  14   17.39   22.47
   4  10 -13   14.12    3.47
  -4 -10  13    6.68   20.88
  -4  10  13   16.01   19.12
  -4  10  12   81.83   21.96
  -4 -10  12   93.37   23.41
   4  10 -12  144.31   14.40
  -4 -10  11  188.26   28.50
  -4  10  11  167.27   22.91
   4 -10 -11  232.64   24.60
  -4  10  11  197.47   27.35
   4 -10 -10    0.20    7.95
  -4  10  10    4.06   11.61
   4  10 -10    2.63    3.08
  -4  10  10    2.16    3.79
   4 -10  -9   19.14    8.62
  -4 -10   9   23.43   11.51
  -4  10   9   14.78   10.56
   4  10  -9   37.88    4.41
  -4  10   9   23.10    4.85
   4 -10  -8   32.90    8.75
  -4  10   8   34.51    5.57
  -4 -10   8   32.13   10.43
   4  10  -8   51.88    5.31
  -4  10   8   27.53    9.54
   4 -10  -7   12.00    7.53
  -4  10   7    5.66    3.32
  -4 -10   7   12.84    8.11
  -4  10   7    5.81    7.05
   4  10  -7   13.47    3.10
   4 -10  -6   92.19   11.57
  -4  10   6   85.68    9.32
  -4  10   6   77.40   10.66
  -4 -10   6   82.87   10.94
   4 -10  -5    6.14    7.25
  -4 -10   5    6.37    5.11
  -4  10   5   12.81    3.38
  -4  10   5    7.61    5.12
  -4  10   4    2.51    3.21
  -4 -10   4    1.02    3.99
  -4  10   4    0.45    4.11
   4 -10  -4    3.25    6.91
  -4  10   3   17.56    3.68
  -4  10   3   11.72    3.63
  -4 -10   3   12.92    3.62
   4 -10  -3   11.80    7.26
  -4  10   2   40.95    5.15
   4 -10  -2   43.16    7.83
  -4 -10   2   35.34    5.03
   4  10  -2   45.84    5.27
  -4 -10   1   84.37   15.22
  -4  10   1   76.58    8.70
   4 -10  -1   62.96   11.59
   4  10  -1   62.17   11.15
  -4 -10   1   84.39    8.65
   4  10  -1   92.98    8.95
   4 -10  -1   76.82   10.94
  -4  10   0   13.18    2.81
   4  10   0   11.31    3.25
  -4 -10   0   14.72    2.73
   4 -10   0   11.62    6.17
  -4 -10   0   18.19   11.83
   4  10   0    7.78    5.13
   4 -10   0   16.11    6.88
   4 -10   1   69.43    9.19
  -4 -10  -1   89.72   14.62
   4  10   1   64.82    9.04
   4 -10   1   91.36   10.76
   4  10   1   82.31    8.45
   4 -10   2   11.62    4.67
   4  10   2   11.90    4.38
   4  10   2   13.28    3.34
   4 -10   2    9.78    7.12
   4 -10   3   14.93    4.44
   4  10   3   13.92    4.32
   4  10   3    9.25    3.26
   4 -10   3    7.54    7.56
   4 -10   4   27.33    7.03
   4  10   4   19.42    7.28
  -4  10  -4   43.10    5.00
   4 -10   4   36.97    9.50
  -4 -10  -4   33.19   11.00
  -4  10  -5  137.24   12.08
   4 -10   5   92.06   15.21
   4 -10   5   89.27   13.40
  -4 -10  -5  100.93   15.68
   4  10   5   86.27   13.54
   4  10   6   22.81    8.34
   4 -10   6   24.58    8.07
  -4  10  -6   37.90    4.82
   4 -10   6   32.61   10.98
  -4 -10  -6   24.33   10.93
   4 -10   7   21.49    8.68
  -4  10  -7   33.01    4.61
  -4 -10  -7   17.11   10.67
   4  10   7   24.51    8.97
  -4  10  -8   25.83    4.12
   4  10   8   11.54    9.25
   4 -10   8   22.38    9.50
  -4 -10  -8    8.57   10.41
  -4  10  -9   -0.78    3.24
   4 -10   9    6.00   10.10
  -4 -10  -9   -2.69   11.28
   4  10   9   -4.92   10.71
   4  10  10   13.26   12.05
   4 -10  10   -5.22   11.32
  -4 -10 -10   21.60   11.31
  -4  10 -10   -0.98    3.33
   4 -10  11  165.46   27.00
   4  10  11  162.01   27.39
  -4 -10 -11  235.95   26.90
  -4  10 -11  264.78   24.28
   4  10  12   50.44   15.31
   4 -10  12   60.48   14.65
  -4 -10 -12   79.68   14.32
  -4  10 -12   85.50    9.00
  -4  10 -13   28.24    4.44
  -4 -10 -13   11.61   11.44
   4  10  13   -4.88   13.91
   4 -10  13   23.98   13.25
  -4  10 -14   15.16    3.90
  -4 -10 -14    4.96   12.03
  -4  10 -15   10.57    3.93
  -4 -10 -15   15.10   11.62
  -4  10 -16   -0.12    3.88
  -4 -10 -16   -0.57   11.89
  -4  10 -17   58.07    7.24
  -4 -10 -17   35.17   13.71
  -4 -10 -18   49.65   13.93
  -4  10 -18   43.17    6.38
  -4 -10 -19   34.61   14.35
  -4  10 -19   36.45    6.00
  -4  10 -20    6.32    4.75
  -4 -10 -20   -0.32   13.86
  -4 -10 -21   29.63   14.72
  -4 -11  20   -6.75   36.95
   4 -11 -20   18.24   11.39
   4 -11 -19   28.16   11.78
  -4 -11  19   32.52   34.55
   4 -11 -18    2.98   10.58
  -4 -11  18   38.58   30.25
  -4  11  18    4.74   28.70
   4  11 -17   34.08    5.24
   4 -11 -17   24.23   10.94
  -4 -11  17   41.48   29.20
  -4  11  17   49.81   26.14
   4 -11 -16   17.91   10.51
   4  11 -16   21.40    4.18
  -4 -11  16   39.51   25.96
  -4  11  16  -14.36   22.68
   4 -11 -15    9.44    9.81
  -4 -11  15   23.23   22.78
   4  11 -15    5.15    3.51
  -4  11  15  -23.99   20.54
   4  11 -14    2.95    3.36
  -4 -11  14   13.47   20.15
  -4  11  14    2.82   17.98
  -4 -11  13  127.93   24.70
  -4  11  13  108.73   22.90
   4  11 -13  171.98   17.02
   4  11 -12    1.68    2.96
  -4 -11  12    6.70   15.52
  -4  11  12    9.42   13.41
  -4  11  12   -0.56    3.86
  -4 -11  11   22.89   13.84
   4 -11 -11   36.76    9.95
   4  11 -11   56.47    5.80
  -4  11  11   19.05   12.58
  -4  11  11   36.01    6.10
   4 -11 -10   11.43    8.68
   4  11 -10    7.81    3.42
  -4  11  10    0.21    3.70
  -4 -11  10    9.97   11.16
  -4  11  10    6.93    9.86
   4 -11  -9   56.31   11.00
   4  11  -9   78.02    7.23
  -4  11   9   50.96    7.24
  -4 -11   9   55.16   11.84
  -4  11   9   29.52   10.30
   4 -11  -8   10.17    8.84
  -4  11   8    9.85    7.50
  -4  11   8    6.76    3.75
  -4 -11   8    8.22    8.37
   4  11  -8   17.77    3.77
   4 -11  -7   17.61    8.52
  -4 -11   7   17.91    7.57
  -4  11   7   27.15    7.16
   4  11  -7   26.55    4.21
  -4  11   7   20.06    4.37
  -4  11   6   24.39    4.18
  -4  11   6   14.41    6.00
  -4 -11   6   15.87    6.15
   4 -11  -6   24.73    8.48
  -4  11   5   36.02    6.19
  -4 -11   5   37.28    6.28
  -4  11   5   45.97    5.69
   4 -11  -5   57.31    9.33
  -4  11   4    9.36    3.67
  -4  11   4    6.89    3.83
  -4 -11   4    2.40    3.68
   4 -11  -4    4.51    8.13
  -4  11   3   19.23    4.04
  -4  11   3   18.14    3.59
  -4 -11   3   14.64    3.46
   4 -11  -3    6.66    7.63
  -4  11   2   12.50    3.22
  -4 -11   2   16.12    3.02
   4 -11  -2   16.03    7.95
  -4 -11   1  208.21   20.15
  -4  11   1  188.26   20.18
  -4 -11   1  197.93   24.78
   4 -11  -1  201.27   22.08
   4  11  -1  207.12   20.56
   4 -11   0    0.72    7.58
   4  11   0    6.86    3.33
   4 -11   0   -2.49    8.12
  -4 -11   0    8.20   13.55
   4  11   1   19.65    3.87
   4 -11   1   15.40    5.38
   4 -11   1   11.65    7.72
   4 -11   2   13.22    7.63
   4  11   2    3.19    3.21
   4 -11   2    4.42    4.82
   4  11   3    0.73    5.53
   4  11   3    0.92    3.18
   4 -11   3   -6.22    8.85
   4 -11   3    2.37    4.45
   4 -11   3    4.32    5.30
   4  11   4   -2.94    5.81
   4 -11   4    2.84    4.28
   4 -11   4   10.19    8.88
   4  11   4    1.92    3.38
   4 -11   4    0.93    5.89
  -4  11  -4    4.59    3.52
   4  11   5   -3.31    6.68
   4 -11   5   16.75    6.73
  -4  11  -5   10.43    3.62
   4 -11   5   -6.90   10.36
  -4 -11  -5   10.86   11.05
   4 -11   6    6.49   11.85
   4  11   6    6.58    7.00
  -4 -11  -6    2.07   11.38
  -4  11  -6    8.81    3.68
   4 -11   6    5.27    7.32
   4 -11   7   69.47   12.92
  -4  11  -7  120.24   10.69
   4  11   7   45.90   12.84
  -4 -11  -7   94.85   15.24
   4  11   8    2.48    9.03
  -4 -11  -8   11.59   11.22
   4 -11   8   -0.82    9.02
  -4  11  -8    8.24    3.82
   4  11   9   44.44   11.87
   4 -11   9   40.93   11.98
  -4  11  -9   65.14    7.29
  -4 -11  -9   54.93   12.75
  -4  11 -10   60.92    6.45
   4 -11  10   21.65   11.51
   4  11  10   18.37   11.56
  -4 -11 -10   27.50   12.38
   4 -11  11    1.08   10.59
  -4  11 -11   10.57    3.72
  -4 -11 -11   -6.12   11.42
   4  11  11    3.00   10.99
  -4  11 -12   50.30    6.46
  -4 -11 -12   40.59   13.41
  -4 -11 -13    2.34   12.37
  -4  11 -13   17.91    4.17
  -4  11 -14    5.49    3.91
  -4 -11 -14    1.80   12.07
  -4  11 -15   23.16    4.73
  -4 -11 -15   18.01   13.47
  -4  11 -16   36.90    5.77
  -4 -11 -16   32.41   14.05
  -4  11 -17    6.10    4.38
  -4 -11 -17  -13.98   13.31
  -4 -11 -18    6.51   13.72
  -4  11 -18   14.36    4.82
  -4 -11 -19   18.34   14.36
  -4  11 -19   18.73    5.27
  -4 -11 -20   16.04   14.85
  -4  11 -20    6.16    5.05
   4 -12 -19    4.70   11.70
  -4 -12  19   -2.61   27.64
   4 -12 -18    4.30   11.07
  -4 -12  18   43.29   26.37
   4 -12 -17  -11.15   10.80
  -4 -12  17   22.07   23.47
   4 -12 -16   -2.99   10.32
   4  12 -16    5.88    3.81
   4 -12 -15   87.99   16.72
  -4 -12  15   88.26   23.54
   4  12 -15  135.12   13.40
   4  12 -14    1.51    3.55
  -4 -12  14    0.77   17.17
  -4  12  14   -2.01    4.35
   4  12 -13   13.44    3.67
  -4 -12  13   14.75   15.36
  -4  12  13    0.12    4.22
   4 -12 -12   -2.19    9.46
   4  12 -12    9.69    3.58
  -4  12  12   -0.82    4.13
  -4 -12  12    4.48   12.88
   4  12 -11   66.60    6.28
  -4 -12  11   31.44   12.14
  -4  12  11   27.11    6.12
   4 -12 -11   68.62   10.71
   4 -12 -10   27.06    9.51
  -4 -12  10   18.89   10.00
  -4  12  10   19.25    4.35
   4  12 -10   20.97    4.27
   4 -12  -9   44.94    9.52
  -4 -12   9   21.06    9.00
  -4  12   9   20.31    4.82
   4  12  -9   38.46    4.82
  -4  12   8   40.66    6.44
   4  12  -8   69.01    6.69
  -4 -12   8   38.91    9.25
   4 -12  -8   43.10   10.78
  -4 -12   7   12.57    6.38
  -4  12   7   11.91    3.86
   4  12  -7   14.72    4.08
   4 -12  -7    5.55    8.94
  -4 -12   6   86.77   10.95
   4 -12  -6  110.20   13.83
  -4  12   6   99.39   10.56
  -4 -12   5   44.64    6.53
  -4  12   5   54.15    6.60
   4 -12  -5   52.58   10.27
  -4  12   4    1.41    3.61
  -4 -12   4   -2.58    3.15
   4 -12  -4   -2.36    5.21
   4 -12  -4   -3.93    8.28
  -4 -12   3    3.99    2.75
   4 -12  -3    8.03    8.44
  -4 -12   2  150.48   15.23
   4 -12  -2  152.49   17.93
  -4 -12   1   82.10   18.02
   4 -12  -1   87.94   13.40
   4  12  -1   98.86   10.54
   4  12   0  131.03   13.84
  -4 -12   0  142.09   20.23
   4 -12   0  126.52   16.23
   4 -12   1   46.94    8.96
  -4 -12  -1   44.26   15.52
   4 -12   1   60.39   10.81
   4  12   1   54.08    6.60
   4  12   2   12.19    3.63
   4 -12   2   12.36    4.92
  -4 -12  -2   11.83   13.87
   4 -12   2    9.89    4.68
   4 -12   2    6.32    9.03
   4 -12   3   23.28    5.71
   4  12   3   28.09    4.59
   4 -12   3   28.73    5.54
   4 -12   3   51.29    9.86
   4  12   4   27.28    4.79
  -4  12  -4   44.43    5.28
   4 -12   4   23.21    5.40
   4 -12   4   22.39    6.52
   4 -12   4   41.73   11.68
   4 -12   5   75.45   12.74
   4 -12   5  116.31   17.24
  -4 -12  -5  100.72   16.83
   4  12   5   83.55   11.39
  -4 -12  -6   30.05   12.51
   4 -12   6   14.45    7.99
  -4  12  -6   32.60    5.12
   4 -12   6   31.06   13.08
  -4  12  -7   41.05    5.63
   4 -12   7   19.33    9.01
  -4 -12  -7   33.78   12.56
   4 -12   8    7.62    8.65
  -4  12  -8   21.12    4.49
  -4 -12  -8   -3.64   11.16
  -4  12  -9    5.51    4.02
  -4 -12  -9   -6.78   11.17
   4 -12   9   -3.17    9.35
  -4  12 -10    6.62    4.08
  -4 -12 -10   -9.49   11.61
  -4  12 -11   84.82    9.43
  -4 -12 -11   58.62   14.73
  -4  12 -12   11.89    4.17
  -4 -12 -12    3.64   12.09
  -4  12 -13   12.86    4.36
  -4 -12 -13    5.96   12.62
  -4  12 -14    7.71    4.27
  -4 -12 -14    0.64   13.33
  -4  12 -15   70.15    8.34
  -4 -12 -15   45.37   15.69
  -4  12 -16   74.71    8.99
  -4 -12 -16   66.72   16.36
  -4  12 -17   48.15    6.89
  -4 -12 -17   25.92   14.91
  -4  12 -18    9.86    5.01
  -4 -12 -18    7.32   14.63
  -4 -12 -19    5.73   14.86
  -4  12 -19    0.46    4.85
   4 -13 -18   -4.25   12.39
   4 -13 -17    2.37   11.65
  -4  13  17    7.56    4.97
   4 -13 -16   25.74   11.48
  -4  13  16   19.69    5.34
  -4  13  15   17.65    5.18
   4  13 -15   26.11    4.82
  -4 -13  15   25.69   17.41
   4  13 -14   27.98    4.56
  -4 -13  14   22.26   14.74
  -4  13  14    7.55    4.79
  -4 -13  13    3.61   13.20
  -4  13  13   16.17    5.20
   4 -13 -12    3.39   10.20
  -4 -13  12    4.76   11.18
   4  13 -12   10.42    4.09
  -4  13  12    7.76    4.09
  -4  13  11   10.47    4.25
   4  13 -11   35.46    4.71
  -4 -13  11   19.06   10.27
   4 -13 -11   15.02   10.27
   4  13 -10    6.84    3.84
  -4 -13  10    9.96    8.39
  -4  13  10    1.30    3.62
   4 -13 -10    5.00    9.69
  -4 -13   9  163.47   22.15
   4 -13  -9  214.08   23.37
  -4  13   9  172.04   21.08
  -4 -13   8   21.77    7.22
  -4  13   8   29.71    5.39
   4  13  -8   54.40    5.70
   4 -13  -8   33.12   10.24
  -4 -13   7  106.88   13.94
   4  13  -7  165.99   13.91
  -4  13   7  118.04   13.64
   4 -13  -7  126.88   16.53
  -4  13   6    4.27    3.71
  -4 -13   6    2.71    3.94
   4 -13  -6    5.37    9.20
  -4  13   5    4.64    3.59
   4 -13  -5   -5.94    9.09
  -4 -13   5    1.28    3.11
  -4  13   4   42.67    5.74
  -4 -13   4   38.43    4.82
   4 -13  -4   36.38   10.49
  -4 -13   3    9.07    2.10
   4 -13  -3    1.09    9.38
   4 -13  -2   22.04   10.05
  -4 -13   1  150.18   21.89
   4  13  -1  143.36   14.99
   4 -13  -1  134.35   17.64
   4  13   0   30.19    5.13
  -4 -13   0   43.77   16.74
   4 -13   0   32.96   10.32
   4  13   1   43.96    6.14
  -4 -13  -1   71.08   16.34
   4 -13   1   52.03   10.89
   4 -13   2   44.32    6.52
  -4 -13  -2   98.53   17.03
   4 -13   2   82.63   11.87
   4  13   2   61.56    6.85
   4 -13   3   -1.36    4.44
   4  13   3    7.02    3.63
   4 -13   3   -7.38   10.63
   4  13   4   28.75    4.85
  -4  13  -4   45.58    5.57
   4 -13   4   38.54   12.00
   4 -13   4   16.13    6.07
   4 -13   5   85.17   15.63
   4  13   5   55.80    8.52
   4 -13   5   57.70    9.74
  -4  13  -6    8.24    4.19
   4  13   6    0.45    3.81
   4 -13   6   10.10   13.13
  -4 -13  -7   86.49   13.74
  -4  13  -7   80.69    7.59
   4  13   7   39.15    7.03
  -4  13  -8   -3.19    4.46
  -4 -13  -8    6.09   11.92
  -4  13  -9   41.54    6.12
  -4 -13  -9   25.33   13.06
  -4  13 -10   13.77    4.58
  -4 -13 -10   -0.62   12.61
  -4  13 -11    5.54    4.32
  -4 -13 -11   -4.70   12.71
  -4  13 -12   12.64    4.74
  -4 -13 -12   28.17   13.88
  -4  13 -13   13.43    4.80
  -4 -13 -13   27.48   14.08
  -4  13 -14   -0.69    4.46
  -4 -13 -14   -9.38   13.96
  -4  13 -15  115.99   12.30
  -4 -13 -15   67.56   18.14
  -4  13 -16   29.59    5.72
  -4 -13 -16    6.03   14.64
  -4  13 -17   51.87    7.51
  -4 -13 -17   47.78   16.40
  -4  13 -18   12.31    5.38
  -4 -13 -18   19.87   15.33
  -4  14  17   -5.26    5.09
   4 -14 -17    1.26   12.48
  -4  14  16    4.78    4.76
   4 -14 -16   -2.47   12.16
   4  14 -15   13.87    4.33
  -4  14  15    1.59    4.52
   4  14 -14    5.92    4.18
  -4  14  14    4.49    4.28
   4  14 -13   36.04    5.18
  -4  14  13   15.22    4.95
   4 -14 -13   19.06   11.58
  -4  14  12    9.31    4.10
   4  14 -12   16.25    4.52
   4 -14 -12   -3.94   10.77
  -4  14  11    2.27    3.86
   4  14 -11    5.12    4.15
   4 -14 -11   -0.82   10.53
   4  14 -10   33.50    5.17
  -4  14  10   12.15    4.36
   4 -14 -10   22.97   10.96
  -4  14   9    5.85    3.94
   4  14  -9   15.14    4.29
   4 -14  -9   16.34   10.37
  -4  14   8    2.54    3.80
   4  14  -8    0.36    4.32
   4 -14  -8    6.06   10.04
  -4  14   7   17.37    4.29
   4  14  -7   26.38    4.96
   4 -14  -7    9.89   10.08
  -4  14   6   11.21    4.12
   4 -14  -6   11.50    9.98
  -4  14   5  158.24   16.72
   4 -14  -5  164.97   19.49
   4 -14  -4   21.54   10.05
   4 -14  -3   80.46   13.40
   4 -14  -2    7.52    9.60
   4 -14  -1   -5.96    9.48
   4  14   0   16.34    4.21
  -4 -14   0   13.24   16.31
   4 -14   0   22.30   10.42
  -4 -14  -1  142.66   21.21
   4 -14   1  109.67   16.38
   4  14   1  123.24   13.11
   4  14   2    2.29    3.49
  -4 -14  -2   -6.62   15.67
   4 -14   2   -2.46   10.92
   4  14   3    6.67    3.68
  -4 -14  -3   -1.87   14.95
   4 -14   3    5.45   11.88
  -4  14  -4    7.64    4.57
   4 -14   4    3.17   13.06
   4  14   4   -2.94    3.40
   4 -14   5  103.47   17.56
   4  14   5   77.79   11.13
   4  14   6   31.37    5.66
  -4 -14  -6   41.01   14.13
  -4  14  -6   58.16    6.62
   4 -14   6   44.87   15.06
  -4 -14  -7    5.26   13.22
  -4  14  -7    1.67    4.45
   4  14   7    2.94    3.85
  -4  14  -8   11.08    4.87
   4  14   8    8.24    4.06
  -4 -14  -8    4.62   12.96
  -4  14  -9   -4.41    4.60
   4  14   9   -1.58    4.11
  -4 -14  -9  -12.64   13.56
  -4  14 -10   -4.21    4.68
  -4 -14 -10   -3.99   13.76
  -4  14 -11   35.46    5.96
  -4 -14 -11   17.48   14.51
  -4  14 -12    2.05    4.63
  -4 -14 -12   14.27   14.22
  -4  14 -13    4.16    4.92
  -4 -14 -13   -7.95   13.66
  -4  14 -14   -0.60    4.97
  -4 -14 -14   15.17   14.70
  -4  14 -15   -0.31    4.71
  -4 -14 -15   -4.32   15.10
  -4  14 -16    0.63    5.06
  -4 -14 -16   17.24   15.37
  -4  14 -17   38.53    6.85
  -4 -14 -17   43.46   16.08
  -4  15  16    3.40    4.71
   4 -15 -16  -15.08   13.49
  -4  15  15   21.10    5.13
   4  15 -14   25.06    4.84
  -4  15  14    3.82    4.46
  -4  15  13   -0.12    4.11
   4  15 -13    4.12    4.63
  -4  15  12    2.98    4.08
   4  15 -12    5.62    4.71
   4 -15 -12   -2.08   11.10
  -4  15  11   32.02    6.33
   4  15 -11   68.53    7.05
   4 -15 -11   52.12   12.63
   4  15 -10   -0.13    4.74
   4 -15 -10    4.53   11.42
  -4  15  10    0.80    3.83
  -4  15   9   87.10   12.52
   4 -15  -9  111.04   16.64
   4  15  -8    7.82    4.63
  -4  15   8    0.34    3.91
   4  15  -7   -0.77    4.61
  -4  15   7   -2.63    3.96
   4 -15  -7   -3.00   10.86
  -4  15   6   15.57    4.28
   4 -15  -6   11.57   10.90
  -4  15   5    2.14    3.90
   4 -15  -5   -6.14   10.58
   4 -15  -4   13.14   10.89
   4 -15  -3   83.64   14.31
   4 -15  -2   -2.60   10.87
   4 -15  -1    3.06   10.41
  -4 -15   0  -18.99   17.13
   4 -15   0    3.85   11.16
   4  15   0    5.34    3.80
   4  15   1   31.63    5.56
  -4 -15  -1   70.84   17.65
   4 -15   1   49.92   11.90
   4  15   2   19.02    4.23
  -4 -15  -2    7.96   16.31
   4 -15   2    7.00   11.10
  -4 -15  -3   96.25   19.67
   4 -15   3  137.90   17.41
   4  15   3   95.20   10.92
   4  15   4    2.06    3.64
   4 -15   4   -0.33   14.03
  -4  15  -4   -2.49    4.96
   4 -15   5   41.16   15.17
   4  15   5   14.58    4.24
  -4  15  -5   31.90    5.64
   4  15   6   -1.43    3.71
  -4  15  -6   -0.76    4.97
   4 -15   6    0.34   15.72
   4  15   7   52.47    8.75
  -4 -15  -7   77.45   16.83
   4  15   8   -3.88    3.95
  -4  15  -8   -1.87    5.09
  -4 -15  -8    9.58   14.67
   4  15   9   25.01    5.87
  -4 -15  -9   51.21   15.12
  -4  15  -9   63.25    6.93
  -4 -15 -10   41.22   15.33
   4  15  10   32.88    7.02
  -4  15 -11   10.55    5.23
  -4 -15 -11    5.04   14.42
  -4  15 -12   13.21    5.32
  -4 -15 -12   -4.36   14.49
  -4  15 -13   -0.81    5.35
  -4 -15 -13  -13.63   15.38
  -4  15 -14   17.43    5.81
  -4 -15 -14   35.85   15.48
  -4  15 -15   54.83    7.97
  -4 -15 -15   49.91   16.65
  -4 -15 -16    9.99   15.31
  -4  16  14    3.18    4.42
   4 -16 -14   13.16   13.09
   4  16 -13   18.45    5.24
  -4  16  13    8.38    4.40
   4 -16 -13   -0.32   12.76
  -4  16  12    0.24    4.26
   4  16 -12    6.83    5.11
   4 -16 -12   -6.02   12.33
  -4  16  11   -1.67    4.08
   4  16 -11   12.46    5.16
   4 -16 -11    7.49   11.91
  -4  16  10    3.05    4.06
   4  16 -10    2.27    4.86
   4 -16 -10   -0.61   12.06
  -4  16   9    3.70    3.99
   4  16  -9    4.63    4.70
   4 -16  -9   -0.61   11.87
  -4  16   8    5.64    4.43
   4  16  -8   15.88    5.13
   4 -16  -8   10.48   11.56
  -4  16   7    1.74    4.05
   4  16  -7    1.25    4.91
  -4  16   6   67.16    8.20
   4 -16  -6   68.65   14.20
   4 -16  -5   96.61   15.75
   4 -16  -4   -3.47   11.88
   4 -16  -3   10.98   11.41
   4 -16  -2   23.53   11.85
   4 -16  -1   16.89   11.39
   4 -16   0  -10.14   12.17
  -4 -16   0   28.81   18.17
   4 -16   1   92.88   15.61
  -4 -16  -1   67.69   20.86
   4  16   1   88.06    9.98
   4  16   2   12.22    4.32
  -4 -16  -2   -3.58   17.25
   4 -16   2   26.83   13.72
   4  16   3    8.74    3.96
  -4 -16  -3    1.78   17.72
   4 -16   3   21.71   15.35
  -4  16  -4   -7.16    5.24
   4  16   4   -2.72    3.89
   4 -16   4    1.43   15.45
  -4 -16  -4   14.85   16.87
   4  16   5   38.69    6.31
  -4  16  -5   68.43    7.67
   4 -16   5   38.44   17.52
   4  16   6    8.66    4.08
  -4  16  -6   23.13    5.77
   4  16   7    7.67    4.03
  -4  16  -7   11.50    5.37
  -4 -16  -7   -5.47   16.10
  -4  16  -8    6.21    5.53
  -4 -16  -8   12.27   15.20
   4  16   8   -2.53    3.87
  -4  16  -9    1.68    5.34
  -4 -16  -9   -0.38   15.51
   4  16   9   -2.26    4.02
  -4 -16 -10    3.84   15.03
   4  16  10   -1.34    4.39
  -4  16 -10   -1.36    5.61
  -4  16 -11   46.40    6.52
   4  16  11   15.45    5.45
  -4 -16 -11   30.36   16.04
  -4  16 -12    7.44    5.53
   4  16  12    6.10    4.87
  -4  16 -13    6.45    5.57
   4  16  13    1.04    4.88
  -4 -16 -13   -1.96   15.83
  -4  16 -14    5.25    5.71
  -4 -16 -14    5.96   16.40
  -4  17  13    7.54    4.45
  -4  17  12   -0.12    4.21
   4  17 -12    1.07    5.42
   4 -17 -12   -6.87   13.62
   4  17 -11   33.61    6.00
  -4  17  11   13.77    4.78
   4 -17 -11   28.01   13.51
  -4  17  10   -2.59    4.17
   4  17 -10   -3.82    5.38
   4 -17 -10   -4.31   13.00
  -4  17   9   38.14    6.86
   4  17  -9   71.46    7.75
   4 -17  -9   49.62   14.21
  -4  17   8   16.65    4.77
   4 -17  -8    1.95   12.93
   4  17  -8   22.23    5.88
   4  17  -7    4.73    5.03
  -4  17   7   10.32    4.15
   4 -17  -7    0.97   12.78
   4 -17  -6  -10.50   12.59
   4 -17  -5    4.72   12.85
   4 -17  -4   -7.31   12.28
   4 -17  -3   49.01   13.77
   4 -17  -2  106.51   16.90
   4 -17  -1  -14.15   12.37
   4 -17   0   -1.53   12.98
  -4 -17  -1   43.96   20.33
   4 -17   1   40.66   14.77
   4  17   2   -1.72    4.22
   4 -17   2   17.72   14.17
  -4 -17  -2   18.64   18.79
   4  17   3   28.31    5.26
  -4 -17  -3   40.06   18.88
   4 -17   3   28.24   16.72
  -4  17  -4   62.49    7.49
   4 -17   4   52.44   17.92
  -4 -17  -4   43.79   19.75
   4  17   4   32.52    6.17
   4  17   5    8.47    4.28
   4 -17   5   26.57   17.18
  -4  17  -5   28.96    6.11
   4  17   6    2.48    4.00
  -4  17  -6   12.97    5.72
  -4  17  -7   67.62    7.77
   4  17   7   35.90    6.40
  -4 -17  -8   12.96   16.99
   4  17   8   13.60    4.73
  -4  17  -8   31.59    6.32
  -4 -17  -9   34.80   16.95
   4  17   9   10.83    4.49
  -4  17  -9   24.45    6.41
  -4  17 -10    3.62    6.10
   4  17  10   -1.70    4.40
  -4 -17 -10    1.65   16.76
  -4  17 -11   10.19    6.05
   4  17  11    9.99    4.86
  -4  17 -12   19.27    6.32
   4  17  12   10.66    5.17
  -4 -17 -12    8.76   17.66
  -4  18  10    1.44    4.44
   4 -18 -10    1.43   14.34
   4  18 -10   -5.55    5.81
  -4  18   9    1.93    4.23
   4  18  -9   -1.44    5.74
  -4  18   8    7.12    4.36
   4  18  -8   11.28    5.71
   4 -18  -8   19.92   13.62
   4  18  -7    3.01    5.37
   4 -18  -7   27.50   14.13
   4 -18  -6   -0.33   13.33
   4 -18  -5   -6.21   13.59
   4 -18  -4   -5.79   13.48
   4 -18  -3   13.19   12.95
   4 -18  -2    6.13   12.94
   4 -18  -1    1.96   13.58
   4 -18   0   12.68   14.58
  -4 -18  -1   14.41   20.58
   4 -18   1  -23.59   15.71
  -4 -18  -2    4.60   20.51
   4 -18   2   14.09   16.50
   4  18   2    8.17    4.31
   4  18   3   10.80    4.55
   4 -18   3   31.65   17.63
  -4 -18  -3    7.09   19.74
   4  18   4   18.86    4.96
  -4 -18  -4   28.34   20.47
   4 -18   4   24.42   18.19
  -4  18  -4   24.29    6.25
   4  18   5   -2.71    4.44
   4 -18   5   -8.46   18.87
  -4  18  -5    4.14    5.82
  -4 -18  -5    6.53   19.67
  -4  18  -6   10.21    6.08
   4  18   6   -1.21    4.13
   4  18   7    3.20    4.06
  -4  18  -7    0.36    5.98
  -4  18  -8   17.29    6.36
  -4 -18  -8    0.92   18.45
   4  18   8   10.18    4.54
  -4  18  -9    2.86    6.27
   4  18   9    0.77    4.37
  -4 -18  -9   13.55   18.64
   4  18  10   14.14    4.90
  -4  18 -10   25.38    6.74
   4 -19  -8   -2.94   14.86
   4 -19  -7    2.14   15.01
   4  19  -7   -4.37    5.91
   4 -19  -6   13.67   14.24
   4 -19  -5  -13.81   14.11
   4 -19  -4   16.52   13.99
   4 -19  -3   26.76   14.50
   4 -19  -2   89.30   17.76
   4 -19  -1    4.58   14.69
   4 -19   0   12.19   16.08
   4 -19   1   12.83   16.33
  -4 -19  -2   22.95   20.93
   4 -19   2   -6.75   17.87
   4 -19   3    7.79   18.53
  -4 -19  -3   26.33   21.48
   4  19   3    3.35    4.45
   4  19   4   -1.44    4.28
   4 -19   4   -6.70   19.73
  -4 -19  -4  -25.66   21.74
  -4  19  -4   -5.46    6.12
   4  19   5    6.45    4.41
  -4  19  -5    3.22    6.15
  -4 -19  -5   -1.61   21.44
   4  19   6    1.41    4.30
  -4  19  -6    3.04    6.28
   4  19   7    0.63    4.28
  -4  19  -7    2.87    6.33
   4 -20  -1   15.05   15.90
   4 -20   0   18.18   17.47
   4 -20   1    7.95   18.90
   5   0 -24    0.48   10.25
  -5   0  24   14.92   54.69
   5   0 -23   -7.84    9.43
  -5   0  23   29.61   51.88
   5   0 -22   -5.39    9.09
  -5   0  22   37.48   46.29
   5   0 -21    6.61    8.47
  -5   0  21  -95.90   46.00
   5   0 -20    3.56    8.10
  -5   0  20   44.91   45.85
   5   0 -19   12.18    8.03
   5   0 -19    0.15    2.72
  -5   0  19    7.54   39.80
   5   0 -18  266.55   33.21
   5   0 -18  337.66   32.28
  -5   0  18  311.80   51.71
   5   0 -17   -4.74    2.63
   5   0 -17   -2.74    6.80
   5   0 -16  182.56   24.40
   5   0 -16  244.15   23.37
  -5   0  16  277.51   47.11
   5   0 -15   -5.73    6.28
   5   0 -15    3.90    2.30
  -5   0  15   -0.88   34.16
   5   0 -14  207.26   20.01
   5   0 -14  162.45   20.96
  -5   0  14  196.90   38.78
   5   0 -13   -5.57    5.36
   5   0 -13    1.54    1.84
  -5   0  13  -12.52   32.21
   5   0 -12  156.37   19.12
   5   0 -12  186.68   18.24
  -5   0  12  160.75   34.83
   5   0 -11   -0.10    1.44
   5   0 -11    0.74    4.47
  -5   0  11   -3.79   29.54
  -5   0  10   38.24   26.20
   5   0 -10   26.19    2.98
   5   0  -9    0.38    1.11
  -5   0   9  -43.11   22.83
  -5   0   8   28.96   16.88
  -5   0   8   36.55    3.84
  -5   0   7    4.11   13.00
  -5   0   7    3.66    1.03
  -5   0   6  174.81   17.38
  -5   0   6  149.80   20.84
  -5   0   5   -0.85    9.25
  -5   0   5   -0.12    0.55
  -5   0   4   31.00    7.81
  -5   0   3    4.61    6.12
  -5   0   2 4348.98  432.25
   5   0  -1    0.45    0.71
  -5   0   1   -4.09    5.19
  -5   0   1   -0.08    0.61
  -5   0   0 1719.68  172.67
   5   0   0 1705.19  172.29
  -5   0   0 1767.10  172.29
  -5   0  -1   -0.44    0.88
   5   0   1   -0.15    0.86
  -5   0  -1    0.55    3.79
  -5   0  -2   44.53    5.66
  -5   0  -2   43.82    4.25
   5   0   2   37.77    4.23
  -5   0  -3   -0.92    3.55
   5   0   3    0.35    1.13
   5   0   3   -0.05    3.22
  -5   0  -3    0.53    1.12
  -5   0  -4  234.20   23.17
  -5   0  -4  224.88   23.62
   5   0   4  230.68   23.29
  -5   0  -5   -0.32    1.32
   5   0   5    0.59    2.24
  -5   0  -6   12.07    1.99
   5   0   7    1.28    2.12
  -5   0  -7    1.55    3.32
  -5   0  -8   59.97    6.65
   5   0   8   54.50    5.98
  -5   0  -9   -3.02    3.85
   5   0   9   -1.48    2.00
  -5   0 -10   88.71    9.59
   5   0  10   58.01   14.91
   5   0  11   -3.72   11.28
  -5   0 -11   -2.87    2.22
  -5   0 -11    0.61    4.33
  -5   0 -12   71.29    7.61
   5   0  12   41.76   15.14
  -5   0 -12   72.49    8.75
  -5   0 -13    1.33    5.37
   5   0  13   -7.67   14.41
  -5   0 -13    0.75    2.45
  -5   0 -14   35.00    6.68
   5   0  14   37.73   16.35
  -5   0 -14   29.95    4.31
   5   0  15   -5.79   16.70
  -5   0 -15    7.87    6.50
  -5   0 -15    1.23    2.88
  -5   0 -16   12.46    6.73
   5   0  16    4.41   18.57
  -5   0 -16    3.23    3.11
   5   0  17  -11.35   20.22
  -5   0 -17   -1.88    6.87
  -5   0 -17   -1.42    3.26
   5   0  18  158.51   30.32
  -5   0 -18  201.33   20.49
   5   0  19   16.38   22.32
  -5   0 -19    5.00    3.68
  -5   0 -20    7.47    4.16
   5   0  20   14.59   21.40
  -5   0 -21    3.43    4.20
  -5   0 -22   81.95    9.75
  -5   0 -23   -2.47    4.80
   5   1 -24    2.78   10.18
  -5   1  24    7.03   55.51
   5  -1 -23   13.52    9.93
   5   1 -23    2.43    8.74
  -5   1  23  -19.94   51.24
   5   1 -22   79.65   12.63
   5  -1 -22   89.20   13.06
  -5   1  22   80.53   50.20
   5   1 -21    7.42    8.70
  -5   1  21   36.93   44.43
   5  -1 -21    0.42    8.79
   5   1 -20  -11.43    7.74
   5   1 -20   -0.28    3.52
   5  -1 -20    0.81    8.38
  -5   1  20   16.06   44.74
   5   1 -19   15.50    7.88
   5   1 -19   13.61    3.56
   5  -1 -19    8.60    8.06
   5  -1 -18   14.84    7.89
   5   1 -18   22.70    7.65
   5   1 -18   21.12    3.51
   5   1 -17   31.28    7.71
   5  -1 -17   29.34    8.21
   5   1 -17   36.67    4.44
  -5   1  17   18.62   37.73
   5   1 -16  266.94   31.60
   5  -1 -16  260.25   31.72
   5   1 -16  326.25   30.69
  -5   1  16  372.93   51.43
   5  -1 -15   38.08    8.12
   5   1 -15   45.39    5.10
   5   1 -15   42.99    8.12
  -5   1  15   31.58   36.65
   5   1 -14   10.11    6.35
   5  -1 -14   19.54    6.21
   5   1 -14   16.88    2.63
   5  -1 -13    3.69    5.53
  -5   1  13   -2.34   32.20
   5   1 -13    4.43    1.80
   5  -1 -12  174.78   20.50
   5   1 -12  199.58   19.63
  -5   1  12  203.70   38.07
   5  -1 -11   64.28    8.60
  -5   1  11   74.74   29.30
   5   1 -11   70.17    7.15
   5   1 -10   -0.46    1.24
  -5   1  10   -5.63   25.46
  -5  -1   9    8.05    1.44
   5   1  -9    7.86    1.38
  -5   1   9    2.28   21.46
   5   1  -8  128.83   12.83
  -5  -1   8  128.69   12.84
   5  -1  -8  116.85   13.64
  -5   1   8  139.89   21.54
   5  -1  -7   -0.56    3.75
   5   1  -7    1.79    0.86
  -5  -1   7    1.61    0.93
  -5   1   7    3.40   14.27
  -5   1   7    3.60    1.00
  -5   1   6   12.29    1.52
   5   1  -6   11.03    1.36
  -5   1   6   13.82   10.85
  -5  -1   6   12.01    1.40
  -5   1   5  256.75   25.37
  -5   1   5  197.96   27.28
  -5   1   4   39.88    9.00
  -5   1   4   40.16    4.25
  -5   1   3  177.87   19.33
   5  -1  -2   32.59    3.37
  -5   1   2   27.80    6.05
  -5   1   2   30.79    3.23
  -5   1   1   40.05    4.11
  -5  -1   1   40.17    4.05
  -5   1   1   46.03    6.25
   5   1  -1   40.03    4.05
   5  -1   0  248.59   26.04
  -5   1   0  275.63   26.68
  -5  -1   0  268.49   26.02
   5   1   0  258.92   26.01
  -5   1   0  265.92   26.04
  -5   1  -1   28.90    5.08
   5  -1   1   29.55    3.23
  -5  -1  -1   28.79    3.10
   5   1   1   30.15    3.09
  -5   1  -1   29.86    3.13
   5  -1   2  547.05   52.95
  -5  -1  -2  548.80   52.93
  -5   1  -2  555.27   53.35
   5   1   2  497.57   52.92
  -5   1  -2  540.76   52.95
  -5  -1  -3   83.88    8.48
  -5   1  -3   85.98    9.47
   5  -1   3   81.75    8.50
   5   1   3   81.37    9.25
   5   1   3   79.85    8.47
  -5   1  -3   91.33    8.52
  -5  -1  -4 1627.90  160.12
  -5   1  -4 1540.01  160.40
   5   1   4 1609.52  160.24
  -5   1  -4 1619.16  160.13
  -5  -1  -5  248.16   24.48
  -5  -1  -5  214.46   24.87
  -5   1  -5  247.15   24.49
   5   1   5  253.42   24.69
  -5  -1  -6  452.64   44.75
  -5  -1  -6  446.80   45.02
   5   1   6  444.68   44.84
  -5  -1  -7   83.73    9.55
  -5  -1  -8   56.95    7.39
   5   1   9    1.49    2.82
  -5   1  -9    5.69    2.92
  -5  -1  -9    3.20    4.58
  -5   1 -10  236.14   24.58
  -5  -1 -10  260.23   25.04
  -5   1 -10  276.59   24.67
   5   1  10  224.92   24.61
   5   1  10  198.61   27.23
  -5   1 -11   91.33   10.11
   5   1  11   89.83   10.25
  -5  -1 -11  116.24   11.29
  -5   1 -11  111.70   10.54
   5   1  11   88.49   16.99
  -5   1 -12   50.74    6.20
  -5  -1 -12   41.33    5.07
  -5   1 -12   43.27    5.15
   5   1  12   26.05   14.07
  -5  -1 -12   46.24    7.20
  -5   1 -13   48.02    6.93
   5   1  13   45.72   16.37
  -5  -1 -13   47.58    5.74
  -5   1 -13   50.36    5.78
  -5  -1 -13   57.37    8.08
   5   1  14   43.11   19.62
  -5  -1 -14   96.92   10.84
  -5   1 -14  108.70   10.89
  -5  -1 -14  109.36   12.43
  -5   1 -14  105.19   11.72
  -5   1 -15    4.80    5.83
  -5  -1 -15    5.80    3.01
  -5   1 -15    8.91    3.11
  -5  -1 -15    5.71    7.19
  -5  -1 -16   12.11    7.29
  -5   1 -16    6.88    6.06
   5   1  16  -10.40   18.62
  -5   1 -16    8.58    3.23
  -5  -1 -16   11.20    3.30
  -5  -1 -17    2.14    7.45
  -5   1 -17    7.36    6.26
  -5   1 -17    2.22    3.20
   5   1  17    2.19   19.19
  -5  -1 -17    3.36    3.31
   5   1  18   83.09   24.93
  -5   1 -18  126.54   13.57
  -5  -1 -18  140.57   15.44
  -5  -1 -18  128.02   13.63
  -5   1 -19    8.79    3.79
   5   1  19  -13.49   22.42
  -5  -1 -19    1.75    3.87
  -5  -1 -20   14.30    4.54
  -5   1 -20   22.72    4.50
   5   1  20    1.28   21.97
  -5  -1 -21    2.74    4.20
  -5   1 -21    7.59    4.20
  -5  -1 -22   11.99    4.72
  -5   1 -22   17.19    4.84
  -5  -1 -23    2.58    4.66
  -5   1 -23    4.58    4.77
   5   2 -24    1.38    9.47
  -5   2  24  -21.05   54.64
  -5  -2  24  -28.07   50.85
   5   2 -23   28.98    9.84
  -5  -2  23  -24.03   48.38
  -5   2  23   27.84   50.32
   5   2 -22    0.21    8.85
  -5  -2  22  -38.28   48.45
  -5   2  22  -20.04   49.30
   5   2 -21   39.37    9.43
  -5   2  21   65.29   47.06
   5  -2 -21   38.46    9.93
  -5  -2  21   18.51   45.52
   5  -2 -20   18.67    9.10
   5   2 -20    3.54    8.29
   5   2 -20   25.25    3.87
  -5  -2  20   17.46   42.86
  -5   2  20   28.48   43.04
   5   2 -19   43.77    9.68
   5   2 -19   60.65    6.50
  -5   2  19   16.36   40.96
   5  -2 -19   38.29   10.05
   5   2 -18   28.21    8.24
   5  -2 -18   36.47    8.85
   5   2 -18   43.65    5.03
   5   2 -17   80.11    8.13
   5   2 -17   60.91   10.48
   5  -2 -17   63.05   10.85
  -5   2  17   67.83   38.69
   5   2 -16    9.46    6.25
   5   2 -16   11.94    2.66
  -5   2  16   31.43   36.95
   5  -2 -16   -5.12    6.69
   5  -2 -15   14.57    6.92
   5   2 -15   17.24    2.87
   5   2 -14   78.14    8.13
  -5   2  14   82.61   34.11
   5  -2 -14   74.32   10.27
   5  -2 -13   34.51    7.81
  -5   2  13   65.22   32.57
   5   2 -13   48.14    5.13
   5  -2 -12  199.21   23.17
  -5   2  12  206.18   37.70
   5   2 -12  225.55   22.20
  -5   2  11   -5.24   29.71
   5   2 -11    1.38    1.34
  -5   2  10  509.35   48.92
   5   2 -10  382.35   38.22
  -5  -2   9   18.91    2.18
   5   2  -9   15.78    2.10
  -5   2   9   25.85   20.73
  -5  -2   8  143.10   14.27
   5  -2  -8  130.87   15.17
   5   2  -8  143.30   14.26
  -5   2   8  130.87   22.04
  -5  -2   7  442.69   43.39
   5   2  -7  435.34   43.38
  -5   2   7  429.46   46.56
   5  -2  -7  400.07   43.84
   5  -2  -6   -2.78    3.65
  -5  -2   6    0.79    0.80
   5   2  -6    1.11    0.68
   5   2  -5  833.44   83.59
  -5   2   5  763.34   84.72
   5  -2  -5  836.88   83.94
  -5   2   5  909.40   83.76
   5  -2  -4   14.72    3.70
  -5   2   4   18.56    2.48
  -5   2   4   22.35    7.45
   5  -2  -3   94.01    9.96
  -5   2   3   93.53   11.87
  -5   2   2  849.38   82.17
   5   2  -2  790.20   81.52
   5  -2  -2  821.98   81.77
   5  -2  -2  864.59   81.64
   5   2  -2  882.31   81.57
   5  -2  -1  205.11   20.47
  -5   2   1  202.79   20.99
   5   2  -1  200.61   20.17
  -5   2   1  207.22   20.23
  -5   2   0    0.95    1.02
   5  -2   0   -1.24    2.10
  -5   2   0   -3.17    3.99
   5   2   0    0.93    0.67
  -5   2  -1   94.41    9.49
   5  -2   1   94.01    9.67
  -5   2  -1  103.73   10.47
   5  -2   1   88.95    9.50
   5   2   1   85.64    9.42
  -5  -2  -1  109.59    9.47
  -5   2  -2  130.34   12.52
   5  -2   2  118.62   11.77
  -5  -2  -2  118.89   11.67
   5  -2   2  112.70   11.71
   5   2   2  111.61   11.65
   5   2   2  108.62   12.69
  -5   2  -2  120.10   11.69
  -5   2  -3   20.05    4.35
  -5  -2  -3   21.90    2.35
  -5   2  -3   21.15    2.39
   5   2   3   17.43    2.32
   5   2   3   20.90    4.69
  -5  -2  -4  494.90   54.86
  -5   2  -4  536.81   54.77
  -5  -2  -4  563.07   54.44
   5   2   4  573.79   54.74
  -5   2  -4  538.04   54.45
  -5  -2  -5  341.30   33.31
  -5  -2  -5  318.29   33.91
   5   2   5  335.09   33.62
  -5   2  -5  329.03   33.31
   5   2   6   23.94    4.91
  -5  -2  -6   29.50    3.34
  -5  -2  -6   26.34    5.84
  -5  -2  -7   13.78    2.22
  -5  -2  -7   12.90    5.11
  -5  -2  -8    9.71    5.13
  -5  -2  -9   81.94    9.98
   5   2  10   -3.71   11.30
  -5   2 -10    1.04    1.97
  -5  -2 -10   -2.52    5.22
  -5   2 -10    0.80    2.23
  -5   2 -11    2.32    2.93
   5   2  11  -11.00   12.33
  -5   2 -11   -1.46    2.02
  -5  -2 -11   -0.52    5.63
  -5   2 -12    2.46    3.62
  -5  -2 -12    0.22    2.47
  -5   2 -12    5.33    2.40
   5   2  12   -4.03   13.53
  -5  -2 -12   -0.78    6.28
  -5   2 -13   21.59    4.67
  -5  -2 -13   18.55    3.42
  -5   2 -13   20.71    3.37
  -5  -2 -13   24.80    7.16
   5   2  14   90.75   22.83
  -5  -2 -14  180.21   18.21
  -5  -2 -14  164.48   16.73
  -5   2 -14  161.45   16.70
  -5   2 -15   94.15    9.95
  -5  -2 -15   93.57    9.94
   5   2  15   60.17   20.04
  -5  -2 -15   81.59   12.32
  -5   2 -16    9.29    3.37
   5   2  16   -0.50   17.49
  -5  -2 -16   10.64    3.36
  -5  -2 -16    2.74    7.97
  -5  -2 -17    6.64    3.39
  -5   2 -17   11.48    3.44
  -5  -2 -17    4.89    8.24
   5   2  18   35.16   21.07
  -5  -2 -18   52.85    6.47
  -5   2 -18   46.98    6.32
  -5  -2 -18   54.47   10.41
   5   2  19  -13.56   21.28
  -5  -2 -19    3.90    3.57
  -5   2 -19    4.02    3.55
  -5  -2 -20    1.21    3.92
  -5   2 -20   -1.47    3.88
   5   2  20   -0.64   22.44
   5  -2  20  -24.01   22.35
  -5  -2 -21    1.18    4.15
  -5   2 -21   -0.65    4.06
  -5  -2 -22    7.35    4.59
  -5   2 -22    0.55    4.23
  -5  -2 -23   71.64    8.91
  -5   2 -23   54.95    8.07
   5   3 -24   10.69   10.03
  -5  -3  24  -48.15   54.31
  -5   3  24  -41.47   55.54
   5   3 -23    2.68    9.49
  -5  -3  23   44.05   48.99
  -5   3  23   13.43   51.08
   5   3 -22   45.91   10.21
  -5  -3  22   32.00   45.35
  -5   3  22  106.09   49.59
   5   3 -21   10.12    8.09
  -5  -3  21   37.98   44.00
   5   3 -20    2.94    7.79
  -5  -3  20  -35.46   41.43
  -5   3  20  -14.80   43.47
   5   3 -19    3.83    7.75
   5   3 -19    0.40    2.96
  -5  -3  19   13.39   39.75
  -5   3  19   18.11   42.31
   5   3 -18   -0.74    7.16
   5  -3 -18   -5.96    8.07
   5   3 -18    4.03    2.68
  -5  -3  18   19.63   38.33
   5  -3 -17    2.08    7.31
   5   3 -17    4.07    2.57
  -5  -3  17   12.10   35.19
  -5   3  17   26.33   37.77
  -5  -3  16   71.91   35.16
  -5   3  16   52.12   36.82
   5  -3 -16   36.18    9.13
   5   3 -16   53.72    5.85
   5  -3 -15  134.58   17.75
  -5  -3  15  122.73   38.36
  -5   3  15  153.46   39.90
   5   3 -15  164.84   16.23
   5   3 -14   79.53    8.24
   5  -3 -14   71.65   10.58
  -5   3  14   66.16   33.47
  -5  -3  14   79.37   33.34
   5   3 -13   60.76    6.38
   5  -3 -13   53.27    8.76
  -5   3  13   75.65   33.62
  -5  -3  13   38.78   33.13
   5   3 -12  109.11   10.93
   5  -3 -12   91.01   12.53
  -5   3  12  139.67   33.31
  -5  -3  12  150.34   33.46
  -5   3  11   24.08   27.70
   5   3 -11   28.84    3.31
  -5  -3  11    8.63   27.88
  -5  -3  10   69.00   26.25
   5   3 -10   55.12    5.74
  -5   3  10   59.33   24.20
   5  -3  -9   72.08   10.10
   5   3  -9   87.54    8.74
  -5   3   9  138.10   22.72
  -5  -3   9   86.05    8.75
  -5  -3   9  104.08   22.44
   5  -3  -8  201.12   20.63
  -5   3   8  188.86   26.35
  -5  -3   8  190.66   19.82
  -5  -3   8  208.63   26.11
   5   3  -8  206.15   19.82
   5  -3  -7  274.42   30.33
   5   3  -7  303.61   29.77
  -5  -3   7  291.14   33.65
  -5   3   7  254.52   33.37
   5  -3  -6  203.41   23.16
  -5   3   6  179.74   25.28
   5   3  -6  230.84   22.55
  -5  -3   6  204.44   25.41
   5  -3  -5   46.59    6.77
  -5   3   5   40.06   10.20
  -5  -3   5   54.61   10.43
  -5  -3   5   50.35    5.50
  -5   3   5   54.83    5.95
   5   3  -5   56.00    5.43
  -5   3   4    1.67    1.88
   5  -3  -4   -1.85    3.60
  -5  -3   4    8.58    7.25
  -5   3   4    0.33    7.17
   5   3  -4    0.48    0.72
  -5  -3   4    0.65    1.52
   5  -3  -3  461.63   47.88
  -5   3   3  497.72   47.67
  -5   3   3  461.89   48.42
  -5  -3   3  436.08   48.35
   5  -3  -2    0.99    2.08
   5  -3  -2    1.93    2.77
  -5  -3   2    0.67    5.05
  -5   3   2    4.07    5.08
   5   3  -2    2.70    1.33
   5  -3  -1  161.35   16.23
  -5  -3   1  164.27   16.75
  -5   3   1  188.04   16.40
  -5   3   1  162.92   16.82
   5  -3  -1  147.34   16.00
   5  -3   0  162.93   17.59
  -5  -3   0  160.47   17.99
  -5   3   0  201.31   17.63
   5   3   0  173.24   17.32
  -5   3   0  170.02   17.39
  -5   3   0  176.94   18.00
  -5   3  -1  780.24   76.17
  -5   3  -1  772.12   75.83
  -5  -3  -1  744.56   76.14
   5   3   1  756.87   75.79
   5   3   2   -0.17    4.76
  -5  -3  -2    2.49    3.60
  -5   3  -2    3.29    3.71
   5   3   2    1.90    1.10
  -5   3  -2    1.35    1.28
  -5   3  -3   16.68    3.92
  -5   3  -3   14.82    2.04
   5   3   3    8.05    4.90
  -5  -3  -3   12.98    3.92
  -5  -3  -4  300.73   30.26
  -5   3  -4  293.36   30.27
  -5  -3  -4  314.40   29.88
  -5  -3  -4  284.88   30.75
   5   3   4  308.97   30.42
   5  -3   4  292.36   29.86
  -5   3  -4  292.95   29.88
  -5  -3  -5  315.37   31.07
  -5  -3  -5  297.73   31.81
   5   3   5  304.82   31.59
  -5  -3  -6  136.88   13.93
  -5  -3  -6  145.72   15.25
  -5  -3  -7  167.37   16.88
  -5  -3  -7  168.73   17.94
  -5  -3  -8   83.33   10.43
  -5  -3  -9  181.63   17.40
  -5   3  -9  154.68   16.12
   5   3  10   62.48   13.99
   5  -3  10   70.56   13.61
  -5   3 -10   78.73    8.44
  -5  -3 -10   97.53   10.44
   5   3  11   50.78   14.74
  -5   3 -11   62.67    6.16
  -5   3 -11   45.99    6.20
   5  -3  11   39.52   12.86
  -5  -3 -11   69.29    8.93
   5  -3  12  119.26   21.09
  -5   3 -12  166.08   16.57
  -5  -3 -12  173.59   18.06
   5   3  12  121.38   21.61
   5   3  13   47.28   16.27
   5  -3  13   60.26   15.83
  -5   3 -13   67.43    7.16
  -5  -3 -13   62.64    7.14
  -5  -3 -13   63.43   10.02
  -5  -3 -14   87.52    9.28
  -5   3 -14   87.27    9.32
   5   3  14   52.66   18.27
  -5  -3 -14   93.11   12.09
   5  -3  14   49.03   17.20
  -5  -3 -15   55.24    6.37
   5   3  15   29.02   18.45
   5  -3  15   54.23   17.89
  -5   3 -15   50.87    6.32
  -5  -3 -15   57.20    9.95
   5   3  16   22.98   18.41
  -5   3 -16   33.88    4.86
  -5  -3 -16   36.85    4.90
   5  -3  16   38.72   17.00
  -5  -3 -16   26.96    9.13
  -5   3 -17   64.86    7.69
  -5  -3 -17   67.16    7.60
   5  -3  17   54.58   19.40
   5   3  17   61.14   21.49
  -5  -3 -17   60.71   11.24
   5   3  18   48.19   21.03
  -5  -3 -18   63.39    7.39
  -5   3 -18   58.92    7.31
  -5  -3 -18   69.02   11.29
   5   3  19   -2.47   21.43
   5  -3  19    5.19   19.46
  -5  -3 -19    1.03    4.01
  -5   3 -19    1.17    3.74
  -5  -3 -19    3.41    9.47
  -5  -3 -20   51.76    7.26
  -5   3 -20   53.64    6.79
   5   3  20   23.30   23.62
   5  -3  20   38.74   22.24
  -5   3 -21   44.11    6.50
  -5  -3 -21   46.43    6.81
  -5  -3 -22   18.75    5.09
  -5   3 -22   20.58    4.94
  -5  -3 -23   17.00    5.17
  -5   3 -23   12.75    5.01
   5   4 -24   16.07   10.21
  -5  -4  24   24.03   53.80
  -5   4  24   54.92   57.35
   5   4 -23    0.23    9.01
  -5  -4  23  -27.51   48.58
  -5   4  23   25.66   53.17
   5   4 -22    5.40    8.77
  -5  -4  22   12.88   45.15
  -5   4  22   20.18   48.52
   5   4 -21   17.34    8.22
  -5  -4  21   54.91   44.61
   5   4 -20   60.33   10.68
  -5  -4  20   90.72   42.08
  -5   4  20   91.30   46.39
   5   4 -19   64.41   11.91
   5   4 -19   98.50    9.81
  -5   4  19   52.56   43.66
  -5  -4  19   31.29   40.24
  -5  -4  18  -67.23   37.22
   5   4 -18    5.60    2.71
  -5   4  18   -9.14   40.91
  -5  -4  17    6.36   34.07
  -5   4  17  -11.47   36.52
   5   4 -17    1.73    2.45
  -5  -4  16   16.24   33.81
  -5   4  16  -27.69   37.22
   5   4 -16    3.95    2.47
  -5   4  15  -23.00   34.13
   5   4 -15   -0.11    2.31
   5  -4 -14    5.29    7.16
  -5  -4  14   32.17   32.81
   5   4 -14    5.32    2.21
   5  -4 -13   10.99    6.78
  -5  -4  13   11.63   31.29
  -5   4  13  -12.69   31.78
   5   4 -13    2.83    1.92
   5   4 -12   68.74    7.19
  -5   4  12   74.17   31.28
  -5  -4  12   35.75   30.87
  -5   4  11  167.74   34.60
  -5  -4  11  171.00   34.60
   5   4 -11  178.32   17.90
  -5  -4  10  150.16   28.48
   5   4 -10  144.81   14.61
  -5   4  10  173.07   27.85
   5  -4  -9  153.04   18.00
   5   4  -9  171.75   17.00
  -5  -4   9  155.64   24.89
  -5   4   9  190.38   25.83
   5  -4  -8  466.48   51.32
  -5   4   8  477.88   53.96
  -5  -4   8  453.94   53.72
   5   4  -8  522.60   50.81
  -5   4   7   11.54   12.34
   5   4  -7    3.27    1.18
   5  -4  -7   -1.64    4.70
  -5  -4   7    4.16   11.37
   5  -4  -6    0.31    4.59
   5   4  -6   -0.19    1.07
  -5   4   6    2.71    9.55
  -5  -4   6   -8.53    9.72
  -5   4   6   -3.70    2.45
   5  -4  -5  178.82   18.85
   5   4  -5  178.79   18.06
  -5  -4   5  144.31   20.01
  -5   4   5  142.53   20.10
  -5  -4   5  186.54   18.13
  -5   4   5  189.25   18.33
  -5   4   4  424.27   51.50
   5  -4  -4  448.43   50.94
  -5   4   4  518.48   50.72
  -5  -4   4  416.70   51.42
  -5  -4   4  563.39   50.67
  -5  -4   3  124.25   16.07
  -5   4   3  142.76   16.20
  -5   4   3  155.35   15.06
  -5  -4   2  209.29   26.60
  -5   4   2  243.15   26.77
   5   4  -2  278.13   26.08
  -5   4   1   46.31    6.28
  -5  -4   1   41.22    6.06
  -5   4   0  118.08   10.86
  -5  -4   0   87.52   11.02
  -5   4   0   95.69   11.10
  -5   4  -1  298.28   32.29
   5   4   1  340.25   31.86
  -5  -4  -1  282.41   32.25
  -5   4  -1  311.39   31.91
  -5  -4  -2  185.50   18.08
  -5   4  -2  176.09   17.62
  -5   4  -2  172.44   18.10
   5  -4   2  169.62   17.81
  -5   4  -3    0.18    3.36
  -5  -4  -3    0.53    3.51
  -5   4  -3    2.69    2.63
  -5   4  -3    0.71    1.49
  -5  -4  -3    6.57    7.15
   5  -4   3    0.17    2.64
  -5   4  -4   91.97   10.25
  -5   4  -4  110.28   10.39
  -5   4  -4   95.77   10.92
  -5  -4  -4  133.89   11.01
  -5  -4  -4   88.52   12.76
   5  -4   4   92.25   10.54
  -5   4  -5  135.59   13.26
   5  -4   5  121.80   13.53
  -5  -4  -5  129.05   15.06
  -5  -4  -6   81.80   10.77
  -5  -4  -7  646.11   64.07
  -5  -4  -7  632.31   64.67
  -5  -4  -8  395.21   39.80
  -5  -4  -8  412.58   40.61
  -5   4  -9    7.80    2.18
  -5  -4  -9   13.88    6.85
   5   4  10   -1.26   11.08
   5  -4  10   -2.05   10.95
  -5  -4 -10    1.43    7.05
  -5   4 -10   -0.20    2.00
   5  -4  11   60.02   15.33
  -5   4 -11   93.74    9.77
   5   4  11   84.56   16.39
  -5   4 -11   93.03    9.73
  -5  -4 -11  100.32   12.18
   5  -4  12   15.64   13.07
   5   4  12    5.09   14.15
  -5   4 -12    5.92    3.59
  -5   4 -12    7.19    2.51
  -5  -4 -12   -1.51    7.73
  -5  -4 -13   13.93    3.10
   5   4  13   14.80   14.83
  -5   4 -13    9.91    4.42
   5  -4  13   10.79   13.94
  -5   4 -13    9.80    2.96
  -5  -4 -13    6.71    8.36
  -5  -4 -14  187.55   18.80
  -5   4 -14  180.35   18.72
  -5  -4 -14  204.12   20.65
   5   4  14  127.17   25.57
   5  -4  14  150.43   24.83
  -5  -4 -15  121.79   12.73
  -5   4 -15  123.08   12.64
   5   4  15   76.11   21.37
   5  -4  15   85.41   20.14
  -5  -4 -15  121.28   15.45
   5  -4  16   -3.79   17.33
  -5  -4 -16   -1.01    3.20
   5   4  16    1.55   18.94
  -5   4 -16   -0.40    3.15
  -5  -4 -16    9.44    8.69
   5   4  17   21.13   19.97
   5  -4  17   38.82   18.74
  -5  -4 -17   32.00    4.97
  -5   4 -17   34.74    5.01
  -5  -4 -17   33.30    9.90
   5   4  18   -8.80   20.72
  -5  -4 -18    2.02    3.61
   5  -4  18   18.85   18.56
  -5   4 -18    1.59    3.50
  -5  -4 -18   -1.57    9.73
   5   4  19   11.69   21.34
   5  -4  19   -6.78   19.63
  -5  -4 -19   -0.95    3.82
  -5   4 -19    0.73    3.69
  -5  -4 -19  -12.33   10.27
  -5   4 -20   21.88    4.85
  -5  -4 -20   27.52    4.89
   5   4  20   14.87   23.00
   5  -4  20   -4.75   21.17
  -5   4 -21   -2.11    4.23
  -5   4 -22   13.03    4.69
  -5   4 -23   17.19    5.24
  -5  -5  23  -13.64   49.46
  -5   5  23   17.49   53.66
   5   5 -23   16.58    9.54
  -5   5  22   52.46   50.86
   5   5 -22   -0.22    8.67
  -5  -5  22   68.23   46.17
   5   5 -21   15.14    8.71
  -5  -5  21   -5.56   44.02
  -5   5  21   16.74   46.14
  -5  -5  20  -93.85   44.84
  -5   5  20   37.54   42.88
  -5   5  19    3.14   40.13
  -5  -5  19    5.92   41.05
  -5   5  18   24.70   38.82
   5   5 -18   34.93    4.61
  -5  -5  17   15.53   35.60
  -5   5  17   56.50   37.86
   5   5 -17    0.14    2.70
  -5   5  16   -9.79   35.49
   5   5 -16    3.30    2.55
  -5  -5  16  -16.28   34.28
   5   5 -15  219.57   22.18
  -5  -5  15  210.88   41.61
  -5   5  15  239.49   43.17
   5   5 -14  268.78   26.94
  -5  -5  14  278.20   45.11
  -5   5  14  205.56   45.47
  -5   5  13   41.37   33.15
  -5  -5  13   47.75   32.71
   5   5 -13   34.23    4.11
   5   5 -12   16.93    2.64
  -5  -5  12   -8.68   30.80
  -5   5  12   37.85   29.61
  -5   5  11  109.83   28.35
  -5  -5  11   78.27   27.99
   5   5 -11   97.92   10.03
  -5   5  10  328.55   41.08
  -5  -5  10  280.11   41.00
   5   5 -10  347.77   34.50
  -5   5   9  106.46   19.75
  -5  -5   9  104.12   20.13
   5   5  -9  102.23   10.39
  -5  -5   8  244.13   30.86
  -5   5   8  210.86   30.49
   5   5  -8  271.66   26.82
  -5   5   7  133.78   16.02
  -5  -5   7  114.67   19.51
   5   5  -7  168.14   15.75
  -5   5   7  143.59   19.42
  -5  -5   6  241.61   32.46
  -5   5   6  255.14   32.49
   5   5  -6  325.10   30.73
  -5  -5   6  307.81   30.75
  -5   5   6  289.89   30.93
   5   5  -5  547.50   55.32
  -5   5   5  447.48   56.35
  -5  -5   5  437.53   56.30
  -5  -5   5  603.54   55.40
  -5   5   5  568.09   55.52
  -5   5   4   11.79    2.66
  -5   5   4    5.08    6.68
  -5  -5   4    7.48    6.50
  -5  -5   3   77.76   11.51
  -5   5   3   97.61   11.72
  -5   5   3  105.38   10.32
  -5   5   2   29.28    5.89
  -5  -5   2   23.88    5.78
   5   5  -2   31.83    3.69
  -5  -5   1    1.13    4.27
  -5   5   1   -1.29    4.19
   5   5  -1    2.82    2.19
  -5  -5   0   -1.16    4.12
  -5   5   0   -0.09    4.06
  -5   5  -1 1255.67  106.81
  -5  -5  -1 1007.54  106.83
  -5   5  -1 1103.76  106.87
  -5   5  -1 1066.25  106.64
   5  -5   1  960.88  106.74
   5  -5   2   32.64    4.98
  -5   5  -2   37.37    5.21
  -5   5  -2   35.32    3.95
  -5  -5  -2   29.77    5.14
  -5  -5  -2   26.89    8.75
  -5  -5  -3  602.15   57.94
  -5   5  -3  569.83   57.93
  -5   5  -3  603.31   57.72
  -5  -5  -3  518.85   58.63
   5  -5   3  551.20   57.82
  -5   5  -4   62.53    6.95
  -5  -5  -4   59.57    6.98
   5  -5   4   48.10    6.93
  -5  -5  -4   59.94   10.22
   5  -5   5   72.75    8.57
  -5  -5  -5   76.70   10.62
  -5  -5  -6  756.64   75.99
  -5  -5  -7   61.81    9.50
  -5   5  -8   22.49    3.60
  -5   5  -8   19.61    2.88
  -5  -5  -8   17.38    6.87
  -5   5  -9    8.19    3.26
  -5  -5  -9    9.87    7.48
   5   5   9   10.78   10.49
   5  -5   9   -2.36    9.57
  -5   5  -9    9.11    2.29
  -5   5 -10    2.52    2.17
   5   5  10   -6.68   12.18
   5  -5  10    8.49   10.94
  -5  -5 -10   -1.15    7.43
  -5   5 -10    2.54    3.51
  -5   5 -11   63.52    7.09
  -5   5 -11   80.28    7.91
  -5   5 -11   70.31    7.36
  -5  -5 -11   57.52   10.74
   5   5  11   68.94   15.43
   5  -5  11   26.71   13.32
   5  -5  12   35.52   13.99
   5   5  12    8.68   14.75
  -5   5 -12   53.01    6.66
  -5   5 -12   53.48    5.73
  -5  -5 -12   51.15   10.48
  -5   5 -12   47.51    5.84
   5   5  13   13.25   15.10
   5  -5  13    4.26   14.37
  -5   5 -13   16.58    3.51
  -5   5 -13   12.11    4.51
  -5  -5 -13   26.58    9.26
  -5   5 -13   14.36    3.27
  -5   5 -14   90.23    9.49
  -5   5 -14   87.82    9.54
   5   5  14   91.00   19.57
   5  -5  14   40.18   17.15
  -5  -5 -14   87.42   13.25
   5   5  15   13.22   16.98
  -5   5 -15   23.04    3.86
   5  -5  15   20.13   16.00
  -5  -5 -15   18.23    9.34
  -5   5 -16   67.14    7.60
   5  -5  16   49.91   18.05
   5   5  16   26.51   19.71
  -5  -5 -16   75.82   11.86
   5  -5  17   38.96   17.96
   5   5  17   47.46   20.22
  -5   5 -17   42.39    5.62
  -5  -5 -17   42.07   11.02
   5  -5  18   20.01   18.80
   5   5  18   -6.40   20.30
  -5   5 -18   28.44    4.54
  -5  -5 -18   11.13   10.86
  -5   5 -19    4.91    3.82
  -5  -5 -19  -18.98   11.04
   5   5  19   12.82   21.69
   5  -5  19   17.13   19.72
  -5   5 -20    5.61    4.01
  -5   5 -21   67.03    8.31
  -5   5 -22   29.29    5.70
  -5   5 -23   -6.02    4.91
   5   6 -23   -6.81    9.54
  -5  -6  23   -6.40   50.80
   5   6 -22    4.37    9.25
  -5  -6  22   24.90   46.97
  -5   6  22   30.58   50.22
  -5   6  21   11.69   48.07
  -5  -6  21  -23.90   44.69
  -5  -6  20   -4.19   42.86
  -5   6  20   37.74   43.42
  -5  -6  19    5.98   40.34
  -5   6  19  114.31   42.79
  -5  -6  18  -25.51   39.02
  -5   6  18    7.89   39.15
   5   6 -18   11.22    3.13
   5   6 -17   44.20    5.38
  -5  -6  17   58.32   37.61
  -5   6  17    6.44   37.64
  -5   6  16   39.97   34.84
  -5  -6  16   43.33   34.61
   5   6 -16   18.21    3.36
  -5  -6  15   21.79   34.61
  -5   6  15  -23.84   34.52
   5   6 -15    4.30    2.53
  -5  -6  14   39.95   33.54
  -5   6  14   29.27   34.22
   5   6 -14    8.94    2.59
  -5  -6  13  181.38   38.64
  -5   6  13  199.74   38.06
   5   6 -13  192.08   19.40
  -5  -6  12   21.92   27.61
  -5   6  12   21.70   27.11
   5   6 -12    5.90    2.16
  -5  -6  11   88.79   24.58
  -5   6  11  116.74   24.77
   5   6 -11   85.57    8.93
  -5  -6  10   42.65   19.55
  -5   6  10   19.07   18.64
   5   6 -10   48.82    5.25
  -5  -6   9  118.31   20.78
  -5   6   9  129.26   21.15
   5   6  -9  140.78   14.14
   5   6  -8  542.48   51.89
  -5  -6   8  389.21   53.83
  -5   6   8  392.16   53.97
  -5  -6   7   20.85   10.19
   5   6  -7   16.93    2.34
  -5   6   7   13.01    3.45
  -5   6   7   23.11   10.22
  -5  -6   6   11.79    8.61
  -5   6   6   12.63    3.20
  -5   6   6   16.93    8.37
   5   6  -6   17.05    2.31
  -5   6   5    4.86    6.84
  -5  -6   5    9.89    7.33
  -5   6   5   15.82    3.08
  -5   6   4  694.44   80.37
  -5  -6   4  718.85   80.33
  -5   6   4  893.87   79.97
  -5   6   3  261.95   29.22
  -5  -6   3  254.48   29.16
  -5   6   3  313.07   28.77
   5   6  -2    4.95    2.13
  -5  -6   2    1.42    4.28
  -5   6   2    1.80    4.32
  -5  -6   1   79.44    9.76
  -5   6   1  100.36    9.94
   5   6  -1   85.82    9.16
   5  -6   0   57.09    7.76
  -5  -6   0   66.30    7.60
  -5   6   0   68.18    7.71
  -5  -6  -1  192.80   19.46
  -5   6  -1  195.06   19.51
   5  -6   1  179.69   19.57
  -5   6  -2  203.58   21.71
  -5   6  -2  230.13   21.46
  -5  -6  -2  208.94   23.59
   5  -6   2  194.87   21.80
  -5  -6  -2  207.66   21.69
  -5  -6  -3    2.60    3.34
  -5   6  -3    0.73    3.32
  -5   6  -3    5.43    2.04
  -5  -6  -3    0.98    8.50
   5  -6   3    2.76    4.32
  -5  -6  -4  293.52   27.53
   5  -6   4  244.52   26.01
   5  -6   5    1.87    4.71
  -5  -6  -5   -3.19    7.39
  -5  -6  -6   12.93    7.40
  -5   6  -7   89.99    9.67
  -5  -6  -7   75.02   11.80
  -5  -6  -8  359.76   41.15
  -5   6  -8  449.11   40.27
  -5   6  -8  377.87   40.13
  -5   6  -9   82.83    9.35
  -5   6  -9  115.04   10.05
   5   6   9   74.01   14.88
  -5  -6  -9   88.89   12.34
   5  -6   9   55.95   13.42
   5   6  10    9.46   11.76
   5  -6  10  -11.20   10.81
  -5   6 -10    1.64    2.30
  -5   6 -10    3.75    4.55
  -5  -6 -10    5.74    8.55
  -5   6 -11   11.63    2.76
   5   6  11   17.07   13.01
   5  -6  11   14.56   11.97
  -5   6 -11    9.42    4.99
  -5  -6 -11    9.53    9.12
  -5   6 -12   29.03    4.03
   5   6  12   16.85   14.44
   5  -6  12   17.17   12.91
  -5   6 -12   25.49    5.82
  -5  -6 -12   14.60    9.91
  -5   6 -13   15.58    3.53
   5  -6  13   23.84   13.84
   5   6  13   34.26   15.23
  -5  -6 -13   20.11   10.32
  -5   6 -13   18.36    3.50
  -5   6 -14   17.54    3.87
  -5  -6 -14   28.98   10.62
   5   6  14   21.37   16.04
   5  -6  14   10.73   14.77
  -5   6 -14   19.55    3.57
   5  -6  15   11.96   15.51
   5   6  15   13.80   17.59
  -5   6 -15   15.61    3.66
  -5  -6 -15   11.07    9.82
   5   6  16   -2.57   18.70
   5  -6  16   11.54   16.44
  -5   6 -16   14.38    3.58
  -5  -6 -16   15.13   10.40
   5   6  17    5.98   19.66
  -5   6 -17   26.83    4.51
   5  -6  17   25.85   17.50
  -5  -6 -17   23.79   10.86
   5   6  18   11.43   20.29
   5  -6  18    1.03   18.56
  -5   6 -18   15.28    4.12
  -5  -6 -18   22.59   11.09
  -5   6 -19    4.25    3.92
  -5  -6 -19    0.49   11.43
   5   6  19  -19.28   21.96
   5  -6  19  -17.28   19.48
  -5   6 -20   38.81    5.87
  -5  -6 -20   35.57   12.81
  -5   6 -21   17.99    4.77
  -5   6 -22   43.51    6.73
   5   7 -23    3.67   10.28
  -5   7  22    8.83   50.87
  -5  -7  22   -1.19   47.67
  -5   7  21  -61.36   48.13
  -5  -7  21   -1.14   45.75
  -5  -7  20   74.89   43.39
  -5   7  20  -13.40   44.31
  -5  -7  19    1.02   40.85
  -5   7  19    9.46   41.14
  -5   7  18   35.41   40.30
  -5  -7  18    1.95   38.86
  -5  -7  17   53.21   37.25
   5   7 -17    5.21    2.85
  -5   7  17    5.58   37.36
  -5  -7  16   50.55   35.26
  -5   7  16   40.44   35.30
   5   7 -16   35.19    4.58
  -5  -7  15   22.22   33.80
  -5   7  15   -0.82   33.17
   5   7 -15   32.51    4.33
  -5  -7  14   14.88   31.29
  -5   7  14   74.54   32.01
   5   7 -14   68.90    7.47
   5   7 -13   23.99    3.52
  -5   7  13   21.30   28.04
  -5  -7  13   19.87   28.40
   5   7 -12    1.80    2.16
  -5  -7  12    1.63   23.39
  -5   7  12   -8.42   23.23
   5   7 -11   24.88    3.34
  -5   7  11   38.75   19.65
  -5  -7  11   17.79   19.30
  -5  -7  10  191.68   28.92
  -5   7  10  180.06   28.62
   5   7 -10  230.97   22.87
  -5   7   9    2.12   13.58
   5   7  -9    2.90    1.89
  -5  -7   9   -0.93   13.84
  -5  -7   8   45.40   12.52
  -5   7   8   38.86   11.93
   5   7  -8   44.25    4.66
  -5   7   8   33.47    5.28
  -5   7   7    1.22    3.01
  -5   7   7   10.65    8.29
   5   7  -7   -0.13    1.77
  -5  -7   7    0.63    8.94
  -5   7   6    7.02    2.97
  -5  -7   6    9.67    7.96
  -5   7   6    4.29    7.36
   5   7  -6    7.17    2.02
  -5  -7   5  478.42   55.04
  -5   7   5  493.41   55.02
  -5   7   5  598.34   54.52
  -5   7   4    5.15    5.31
  -5  -7   4    2.42    5.08
  -5   7   4    2.11    2.76
  -5   7   3    1.04    2.71
  -5  -7   3   -2.08    4.61
  -5   7   3    3.62    4.69
   5  -7  -2   40.41    6.78
  -5   7   2   43.50    6.41
  -5  -7   2   30.92    6.08
   5   7  -2   54.79    5.34
  -5  -7   1  155.24   17.32
  -5   7   1  168.69   17.41
   5  -7  -1  160.53   17.65
   5   7  -1  178.52   17.09
  -5  -7   0  150.53   15.58
  -5   7   0  164.25   15.64
   5  -7   0  149.00   15.99
   5   7   0  141.59   15.33
  -5  -7  -1  167.89   17.16
  -5   7  -1  171.57   17.23
   5  -7   1  156.42   17.55
  -5  -7  -2   87.96    9.73
  -5   7  -2   94.03    9.41
   5  -7   2   83.26   10.28
  -5   7  -2   86.30    9.74
  -5  -7  -2   89.54   13.70
  -5  -7  -3  261.69   25.39
  -5   7  -3  238.73   25.34
  -5  -7  -3  246.41   27.31
   5  -7   3  252.60   25.66
  -5  -7  -4   -2.78    8.61
   5  -7   4    5.68    4.89
   5  -7   5  241.01   24.74
  -5  -7  -5  234.78   25.95
   5  -7   6  394.68   40.45
  -5  -7  -6  403.35   40.99
  -5   7  -7   -2.60    4.92
  -5   7  -7    0.61    2.17
  -5  -7  -7   -7.35    8.59
  -5   7  -8   19.13    5.43
  -5   7  -8   15.35    2.95
   5  -7   8   22.99    8.94
   5   7   8   10.95   10.29
  -5  -7  -8   12.74    8.44
  -5   7  -9   -3.48    5.33
  -5   7  -9   -0.67    2.45
   5   7   9    4.28   11.33
   5  -7   9    7.28    9.99
  -5  -7  -9   -4.91    9.36
  -5   7 -10   44.24    5.33
   5   7  10   21.77   12.63
  -5  -7 -10   43.25   10.82
   5  -7  10   28.86   11.56
  -5   7 -10   56.84    7.32
   5   7  11  186.71   30.22
   5  -7  11  176.49   29.91
  -5  -7 -11  263.86   29.16
  -5   7 -11  305.49   27.48
  -5   7 -11  270.60   27.00
   5  -7  12   -5.72   12.81
  -5   7 -12   26.07    3.89
  -5  -7 -12   21.08   11.13
   5   7  12   12.39   14.29
  -5   7 -13    5.50    3.02
   5  -7  13   18.08   13.52
   5   7  13   13.18   14.92
  -5  -7 -13    1.33   10.03
  -5   7 -14   -3.02    3.17
   5   7  14   18.94   16.18
   5  -7  14    4.62   14.09
  -5  -7 -14   -2.49   10.41
   5  -7  15  -18.67   15.42
   5   7  15   21.36   17.19
  -5  -7 -15    1.87   10.90
  -5   7 -15    1.02    3.18
   5  -7  16   22.55   16.83
   5   7  16   -0.50   18.46
  -5  -7 -16   19.05   11.49
  -5   7 -16   28.84    4.60
   5   7  17   -2.13   18.90
   5  -7  17    1.90   16.56
  -5   7 -17   -2.08    3.72
  -5  -7 -17   -2.49   11.60
  -5   7 -18    3.34    3.66
  -5  -7 -18   -5.19   11.62
   5   7  18   -8.95   19.81
   5  -7  18   14.49   17.83
  -5   7 -19    1.77    3.89
  -5  -7 -19   -8.06   12.27
  -5   7 -20    1.49    4.21
  -5  -7 -20   -2.50   12.58
  -5   7 -21   28.69    5.60
  -5   7 -22    7.39    4.83
  -5  -8  22   28.02   47.86
  -5   8  22   29.09   49.21
  -5  -8  21   -3.35   44.30
  -5   8  21  -57.39   47.70
  -5  -8  20  -16.98   42.84
  -5   8  20  -60.57   43.70
  -5  -8  19   18.09   40.99
  -5   8  19   -3.04   40.85
  -5  -8  18  -18.95   39.35
  -5   8  18  -22.71   38.82
  -5  -8  17   12.42   37.69
  -5   8  17   71.08   35.98
   5   8 -17   60.90    6.95
  -5   8  16   14.55   32.07
  -5  -8  16  -20.31   32.63
   5   8 -16    5.96    2.93
  -5  -8  15   40.99   30.56
  -5   8  15   54.55   30.14
   5   8 -15   51.52    6.05
   5   8 -14  162.55   16.42
  -5   8  14  100.03   31.25
  -5  -8  14  127.44   31.60
  -5  -8  13   45.91   25.38
  -5   8  13   61.68   23.72
   5   8 -13   97.41   10.08
   5   8 -12   20.84    3.33
  -5   8  12   33.50   19.72
  -5  -8  12    6.88   21.49
  -5   8  11    6.29   17.04
   5   8 -11    2.89    2.32
  -5  -8  11   16.35   17.36
   5   8 -10    6.52    2.33
  -5   8  10   -7.24   14.20
  -5  -8  10   -5.65   15.32
   5   8  -9   81.92    7.78
  -5   8   9   66.97   13.58
  -5  -8   9   57.60   14.10
  -5   8   9   57.48    8.24
  -5   8   8   10.80    3.29
  -5   8   8   13.76   10.26
   5   8  -8    9.37    2.52
  -5  -8   8   -1.58   10.52
  -5  -8   7   14.51    9.00
  -5   8   7    7.40    8.55
  -5   8   7   15.43    3.54
   5   8  -7   16.99    2.77
  -5   8   6   26.84    4.23
  -5  -8   6   21.36    8.11
  -5   8   6   27.56    7.65
  -5  -8   5   76.42   10.55
  -5   8   5   68.96   10.48
  -5   8   5   88.84    9.04
   5  -8  -4   69.02    9.61
  -5  -8   4   68.34    9.24
  -5   8   4   56.69    9.29
  -5   8   4   89.84    8.40
   5  -8  -3   15.45    5.99
  -5  -8   3   14.23    4.69
  -5   8   3   22.07    4.95
  -5   8   3   22.28    3.55
   5  -8  -2   11.48    5.33
  -5  -8   2   11.79    3.94
  -5   8   2   12.48    4.03
   5   8  -2   13.75    2.86
  -5  -8   1  102.21   12.19
  -5   8   1  129.23   12.30
   5  -8  -1  116.42   12.87
   5   8  -1  115.81   11.99
   5   8   0   47.52    8.11
  -5  -8   0   51.28    6.49
   5   8   0   50.06    6.11
  -5   8   0   61.50    6.60
   5  -8   0   58.86    7.74
  -5  -8  -1  155.92   14.48
  -5   8  -1  144.11   14.46
   5  -8   1  131.98   15.04
   5   8   1  125.83   14.31
  -5  -8  -2  364.08   35.22
  -5   8  -2  342.79   35.21
  -5  -8  -2  349.92   37.24
   5  -8   2  338.43   35.67
  -5  -8  -3   15.02   10.45
   5  -8   3   21.00    6.14
   5  -8   4    4.92    5.83
  -5  -8  -4    8.43    9.29
   5  -8   5  152.99   16.94
  -5  -8  -5  153.34   18.51
   5  -8   6   11.04    7.61
[truncated: 531,964 more chars]
