# Supplementary material for: Isolation and electronic structures of derivatized manganocene, ferrocene and cobaltocene anions
Source: Springer Nature journal article supplement (doi:10.1038/s41557-020-00595-w), 2020-12-14
Supplement: 41557_2020_595_MOESM22_ESM.cif [file 41557_2020_595_MOESM22_ESM.cif]

data_8

_manchester_internal_coll_name         rdpm103
_manchester_internal_coll_client       CAPG
_manchester_internal_coll_type         custom
_manchester_internal_coll_frame_time   '3/7s'
_manchester_internal_coll_frame_width  '1.0'
_manchester_internal_coll_frame_method '\w scans'
_manchester_internal_coll_user         CAPG
_manchester_internal_coll_date         7/1/17
_manchester_internal_process_user      CAPG
_manchester_internal_process_date      7/1/17
_manchester_internal_solution_user     CAPG
_manchester_internal_solution_date     7/1/17
_manchester_internal_refinement_user   CAPG
_manchester_internal_refinement_date   7/1/17
_manchester_internal_validation_user   CAPG
_manchester_internal_validation_date   18/6/18
_manchester_internal_archive_date      19/6/18

_refine_special_details           
;
Disorder was identified in both free THF molecules (O13, C71-C74 and O14,
C75-C78). Similarity restraints (SIMU) and enhanced rigid bond restraints
(RIGU) were applied to both full molecules.
;
 

_audit_creation_date               2018-06-18
_audit_creation_method
;
Olex2 1.2
(compiled 2018.04.26 svn.r3504 for OlexSys, GUI svn.r5492)
;
_shelx_SHELXL_version_number       '2018/3'
_audit_contact_author_address      ?
_audit_contact_author_email        ?
_audit_contact_author_name         ''
_audit_contact_author_phone        ?
_publ_contact_author_id_orcid      ?
_publ_section_references
;
Dolomanov, O.V., Bourhis, L.J., Gildea, R.J, Howard, J.A.K. & Puschmann, H.
 (2009), J. Appl. Cryst. 42, 339-341.

Sheldrick, G.M. (2015). Acta Cryst. C71, 3-8.
;
_chemical_name_common              ?
_chemical_name_systematic          ?
_chemical_formula_moiety           'C18 H36 K N2 O6, C4 H8 O, C17 H29'
_chemical_formula_sum              'C39 H73 K N2 O7'
_chemical_formula_weight           721.09
_chemical_melting_point            ?
_chemical_oxdiff_formula           C5H2(C4H9)3KN2O6C18H38
loop_
  _atom_type_symbol
  _atom_type_description
  _atom_type_scat_dispersion_real
  _atom_type_scat_dispersion_imag
  _atom_type_scat_source
 'C' 'C' 0.0181 0.0091 'International Tables Vol C Tables 4.2.6.8 and 6.1.1.4'
 'H' 'H' 0.0000 0.0000 'International Tables Vol C Tables 4.2.6.8 and 6.1.1.4'
 'K' 'K' 0.3868 1.0657 'International Tables Vol C Tables 4.2.6.8 and 6.1.1.4'
 'N' 'N' 0.0311 0.0180 'International Tables Vol C Tables 4.2.6.8 and 6.1.1.4'
 'O' 'O' 0.0492 0.0322 'International Tables Vol C Tables 4.2.6.8 and 6.1.1.4'

_shelx_space_group_comment
;
The symmetry employed for this shelxl refinement is uniquely defined
by the following loop, which should always be used as a source of
symmetry information in preference to the above space-group names.
They are only intended as comments.
;
_space_group_crystal_system        'triclinic'
_space_group_IT_number             2
_space_group_name_H-M_alt          'P -1'
_space_group_name_Hall             '-P 1'
loop_
  _space_group_symop_operation_xyz
 'x, y, z'
 '-x, -y, -z'

_cell_length_a                     15.5407(17)
_cell_length_b                     17.6505(16)
_cell_length_c                     18.624(2)
_cell_angle_alpha                  63.484(10)
_cell_angle_beta                   72.496(10)
_cell_angle_gamma                  76.511(9)
_cell_volume                       4330.1(9)
_cell_formula_units_Z              4
_cell_measurement_reflns_used      2336
_cell_measurement_temperature      150.00(10)
_cell_measurement_theta_max        55.8990
_cell_measurement_theta_min        2.9880
_shelx_estimated_absorpt_T_max     ?
_shelx_estimated_absorpt_T_min     ?
_exptl_absorpt_coefficient_mu      1.425
_exptl_absorpt_correction_T_max    1.000
_exptl_absorpt_correction_T_min    0.568
_exptl_absorpt_correction_type     gaussian
_exptl_absorpt_process_details
;
CrysAlisPro 1.171.39.46 (Rigaku Oxford Diffraction, 2018)
Numerical absorption correction based on gaussian integration over
			a multifaceted crystal model
Empirical absorption correction using spherical harmonics,
 implemented in SCALE3 ABSPACK scaling algorithm.
;
_exptl_absorpt_special_details     ?
_exptl_crystal_colour              'clear colourless'
_exptl_crystal_colour_lustre       clear
_exptl_crystal_colour_primary      colourless
_exptl_crystal_density_diffrn      1.106
_exptl_crystal_density_meas        ?
_exptl_crystal_density_method      ?
_exptl_crystal_description         plate
_exptl_crystal_F_000               1584
loop_
  _exptl_crystal_face_index_h
  _exptl_crystal_face_index_k
  _exptl_crystal_face_index_l
  _exptl_crystal_face_perp_dist
 5 -8 0 0.0385
 7 8 10 0.0936
 -7 6 -2 0.0371
 -7 -9 -10 0.1300
 -3 -8 4 0.0145
 -2 8 10 0.0609
 6 1 -7 0.0311
 -5 5 8 0.0385

_exptl_crystal_preparation         'By CAPG.'
_exptl_crystal_recrystallization_method  'From THF/hexane layering.'
_exptl_crystal_size_max            0.235
_exptl_crystal_size_mid            0.107
_exptl_crystal_size_min            0.069
loop_
  _exptl_oxdiff_crystal_face_indexfrac_h
  _exptl_oxdiff_crystal_face_indexfrac_k
  _exptl_oxdiff_crystal_face_indexfrac_l
  _exptl_oxdiff_crystal_face_x
  _exptl_oxdiff_crystal_face_y
  _exptl_oxdiff_crystal_face_z
 5.0000 -8.0000 -0.0000 0.1063 -0.5897 -0.7921
 7.0000 8.0000 10.0000 0.1761 -0.7633 0.6229
 -7.0000 6.0000 -2.0000 -0.2057 0.7641 0.6494
 -7.0000 -9.0000 -10.0000 -0.2139 0.7273 -0.7061
 -3.0000 -8.0000 4.0000 -0.8262 -0.3586 -0.5360
 -2.0000 8.0000 10.0000 -0.5590 -0.2204 0.8505
 6.0000 1.0000 -7.0000 1.0163 0.1143 -0.1626
 -5.0000 5.0000 8.0000 -0.7778 -0.0216 0.6500

_exptl_transmission_factor_max     ?
_exptl_transmission_factor_min     ?
_diffrn_reflns_av_R_equivalents    0.1351
_diffrn_reflns_av_unetI/netI       0.1451
_diffrn_reflns_Laue_measured_fraction_full  0.964
_diffrn_reflns_Laue_measured_fraction_max  0.962
_diffrn_reflns_limit_h_max         18
_diffrn_reflns_limit_h_min         -18
_diffrn_reflns_limit_k_max         21
_diffrn_reflns_limit_k_min         -18
_diffrn_reflns_limit_l_max         22
_diffrn_reflns_limit_l_min         -21
_diffrn_reflns_number              43539
_diffrn_reflns_point_group_measured_fraction_full  0.964
_diffrn_reflns_point_group_measured_fraction_max  0.962
_diffrn_reflns_theta_full          67.684
_diffrn_reflns_theta_max           68.244
_diffrn_reflns_theta_min           2.722
_diffrn_ambient_environment        N~2~
_diffrn_ambient_temperature        150.00(10)
_diffrn_detector                   'CCD plate'
_diffrn_detector_area_resol_mean   ?
_diffrn_measured_fraction_theta_full  0.964
_diffrn_measured_fraction_theta_max  0.962
_diffrn_measurement_details
;
List of Runs (angles in degrees, time in seconds):

  # Type    Start    End  Width  t~exp~   \w     \q     \k     \f   Frames
--------------------------------------------------------------------------
  1  \w    -28.00  42.00   1.00    3.00    --  -44.80  64.00  13.25   70
  2  \w   -133.00  42.00   1.00    3.00    --  -44.80 -20.00-167.08  175
  3  \w    -81.00  21.00   1.00    3.00    --  -44.80  47.00 138.30  102
  4  \w    -72.00  12.00   1.00    3.00    --  -44.80  51.00  -3.78   84
  5  \w    -81.00   3.00   1.00    3.00    --  -44.80  72.00 176.45   84
  6  \w   -110.00 -24.00   1.00    7.00    -- -110.00  38.00 150.00   86
  7  \w    -54.00 -27.00   1.00    7.00    -- -110.00  76.00-150.00   27
  8  \w   -107.00 -82.00   1.00    7.00    -- -110.00  76.00  30.00   25
  9  \w    -48.00 -23.00   1.00    7.00    -- -110.00  76.00 150.00   25
 10  \w   -148.00 -73.00   1.00    7.00    -- -110.00  76.00 150.00   75
 11  \w   -198.00 -79.00   1.00    7.00    -- -110.00 -38.00 120.00  119
 12  \w   -192.00-136.00   1.00    7.00    -- -110.00 -76.00 150.00   56
 13  \w   -143.00-116.00   1.00    7.00    -- -110.00  76.00-120.00   27
 14  \w    -77.00 -29.00   1.00    7.00    -- -110.00  76.00-120.00   48
 15  \w   -147.00 -98.00   1.00    7.00    -- -110.00  76.00-150.00   49
 16  \w   -151.00-107.00   1.00    7.00    -- -110.00 -76.00-150.00   44
 17  \w   -188.00-161.00   1.00    7.00    -- -110.00 -76.00-150.00   27
 18  \w    -59.00 -32.00   1.00    7.00    -- -110.00  76.00 -30.00   27
 19  \w   -121.00 -80.00   1.00    7.00    -- -110.00  76.00 -90.00   41
 20  \w   -128.00-100.00   1.00    7.00    -- -110.00  76.00  90.00   28
 21  \w    -72.00 -45.00   1.00    7.00    -- -110.00  76.00  90.00   27
 22  \w    -56.00 -25.00   1.00    7.00    -- -110.00  38.00   0.00   31
 23  \w   -171.00 -77.00   1.00    7.00    -- -110.00 -57.00   0.00   94
 24  \w   -148.00 -22.00   1.00    7.00    -- -110.00  76.00-180.00  126
 25  \w    -89.00 -64.00   1.00    7.00    -- -110.00  19.00-150.00   25
 26  \w   -145.00 -65.00   1.00    7.00    -- -110.00  76.00  60.00   80
 27  \w   -125.00 -62.00   1.00    7.00    -- -110.00  38.00   0.00   63
 28  \w   -110.00 -80.00   1.00    7.00    -- -110.00  76.00-120.00   30
 29  \w   -143.00 -65.00   1.00    7.00    -- -110.00  76.00 -30.00   78
 30  \w   -196.00-124.00   1.00    7.00    -- -110.00  19.00-150.00   72
 31  \w    -70.00 -45.00   1.00    7.00    -- -110.00  76.00  30.00   25
 32  \w   -148.00 -39.00   1.00    7.00    -- -110.00  76.00 120.00  109
 33  \w   -139.00-112.00   1.00    7.00    -- -110.00  76.00  30.00   27
 34  \w   -116.00 -24.00   1.00    7.00    -- -110.00  57.00-120.00   92
 35  \w   -128.00 -96.00   1.00    7.00    -- -110.00  76.00   0.00   32
 36  \w   -199.00-108.00   1.00    7.00    -- -110.00 -76.00-180.00   91
 37  \w    -72.00 -23.00   1.00    7.00    -- -110.00  38.00  60.00   49
 38  \w    -79.00 -54.00   1.00    7.00    -- -110.00  57.00 120.00   25
 39  \w   -165.00-140.00   1.00    7.00    -- -110.00 -57.00 -30.00   25
 40  \w   -145.00-120.00   1.00    7.00    -- -110.00  76.00 -60.00   25
 41  \w   -198.00 -28.00   1.00    7.00    -- -110.00   0.00 -30.00  170
;
_diffrn_measurement_device         'four-circle diffractometer'
_diffrn_measurement_device_type    'XtaLAB AFC11 (RINC): Kappa single'
_diffrn_measurement_method         '\w scans'
_diffrn_orient_matrix_type        
 'CrysAlisPro convention (1999,Acta A55,543-557)'
_diffrn_orient_matrix_UB_11        0.0816826000
_diffrn_orient_matrix_UB_12        0.0377606000
_diffrn_orient_matrix_UB_13        -0.0697758000
_diffrn_orient_matrix_UB_21        -0.0603309000
_diffrn_orient_matrix_UB_22        0.0360003000
_diffrn_orient_matrix_UB_23        -0.0629022000
_diffrn_orient_matrix_UB_31        -0.0252934000
_diffrn_orient_matrix_UB_32        0.0832004000
_diffrn_orient_matrix_UB_33        0.0134357000
_diffrn_radiation_monochromator    mirror
_diffrn_radiation_probe            x-ray
_diffrn_radiation_type             CuK\a
_diffrn_radiation_wavelength       1.54184
_diffrn_source                     'Rotating-anode X-ray tube (dual wavelength)'
_diffrn_source_type                'Rigaku (Cu) X-ray DW Source'
_reflns_Friedel_coverage           0.000
_reflns_Friedel_fraction_full      .
_reflns_Friedel_fraction_max       .
_reflns_number_gt                  6804
_reflns_number_total               15269
_reflns_odcompleteness_completeness  98.35
_reflns_odcompleteness_iscentric   1
_reflns_odcompleteness_theta       74.33
_reflns_special_details
;
 Reflections were merged by SHELXL according to the crystal
 class for the calculation of statistics and refinement.
 
 _reflns_Friedel_fraction is defined as the number of unique
 Friedel pairs measured divided by the number that would be
 possible theoretically, ignoring centric projections and
 systematic absences.
;
_reflns_threshold_expression       'I > 2\s(I)'
_computing_cell_refinement         'CrysAlisPro 1.171.39.46 (Rigaku OD, 2018)'
_computing_data_collection         'CrysAlisPro 1.171.39.46 (Rigaku OD, 2018)'
_computing_data_reduction          'CrysAlisPro 1.171.39.46 (Rigaku OD, 2018)'
_computing_molecular_graphics      'Olex2 (Dolomanov et al., 2009)'
_computing_publication_material    'Olex2 (Dolomanov et al., 2009)'
_computing_structure_refinement    'ShelXL (Sheldrick, 2015)'
_computing_structure_solution      ?
_refine_diff_density_max           0.634
_refine_diff_density_min           -0.606
_refine_diff_density_rms           0.058
_refine_ls_extinction_coef         .
_refine_ls_extinction_method       none
_refine_ls_goodness_of_fit_ref     0.958
_refine_ls_hydrogen_treatment      constr
_refine_ls_matrix_type             full
_refine_ls_number_parameters       901
_refine_ls_number_reflns           15269
_refine_ls_number_restraints       120
_refine_ls_R_factor_all            0.1755
_refine_ls_R_factor_gt             0.0798
_refine_ls_restrained_S_all        0.960
_refine_ls_shift/su_max            0.000
_refine_ls_shift/su_mean           0.000
_refine_ls_structure_factor_coef   Fsqd
_refine_ls_weighting_details      
 'w=1/[\s^2^(Fo^2^)+(0.1058P)^2^] where P=(Fo^2^+2Fc^2^)/3'
_refine_ls_weighting_scheme        calc
_refine_ls_wR_factor_gt            0.1896
_refine_ls_wR_factor_ref           0.2460

_olex2_refinement_description
;
1. Fixed Uiso
 At 1.2 times of:
  All C(H) groups, All C(H,H) groups
 At 1.5 times of:
  All C(H,H,H) groups
2. Uiso/Uaniso restraints and constraints
C73 \\sim O13 \\sim C71 \\sim C74 \\sim C72 \\sim O14 \\sim C75 \\sim C78 \\sim
C76 \\sim C77: within 2A with sigma of 0.008 and sigma for terminal atoms of
0.008
3. Rigid body (RIGU) restrains
 C71, O13, C74, C72, C73, O14, C75, C78, C76, C77
 with sigma for 1-2 distances of 0.008 and sigma for 1-3 distances of 0.008
4.a Secondary CH2 refined with riding coordinates:
 C35(H35A,H35B), C36(H36A,H36B), C37(H37A,H37B), C38(H38A,H38B), C39(H39A,
 H39B), C40(H40A,H40B), C41(H41A,H41B), C42(H42A,H42B), C43(H43A,H43B),
 C44(H44A,H44B), C45(H45A,H45B), C46(H46A,H46B), C47(H47A,H47B), C48(H48A,H48B),
  C49(H49A,H49B), C50(H50A,H50B), C51(H51A,H51B), C52(H52A,H52B), C53(H53A,
 H53B), C54(H54A,H54B), C55(H55A,H55B), C56(H56A,H56B), C57(H57A,H57B),
 C58(H58A,H58B), C59(H59A,H59B), C60(H60A,H60B), C61(H61A,H61B), C62(H62A,H62B),
  C63(H63A,H63B), C64(H64A,H64B), C65(H65A,H65B), C66(H66A,H66B), C67(H67A,
 H67B), C68(H68A,H68B), C69(H69A,H69B), C70(H70A,H70B), C71(H71A,H71B),
 C72(H72A,H72B), C73(H73A,H73B), C74(H74A,H74B), C75(H75A,H75B), C76(H76A,H76B),
  C77(H77A,H77B), C78(H78A,H78B)
4.b Aromatic/amide H refined with riding coordinates:
 C2(H2), C5(H5), C19(H19), C22(H22)
4.c Idealised Me refined as rotating group:
 C7(H7A,H7B,H7C), C8(H8A,H8B,H8C), C9(H9A,H9B,H9C), C11(H11A,H11B,H11C),
 C12(H12A,H12B,H12C), C13(H13A,H13B,H13C), C15(H15A,H15B,H15C), C16(H16A,H16B,
 H16C), C17(H17A,H17B,H17C), C24(H24A,H24B,H24C), C25(H25A,H25B,H25C), C26(H26A,
 H26B,H26C), C28(H28A,H28B,H28C), C29(H29A,H29B,H29C), C30(H30A,H30B,H30C),
 C32(H32A,H32B,H32C), C33(H33A,H33B,H33C), C34(H34A,H34B,H34C)
;
_atom_sites_solution_hydrogens     geom
_atom_sites_solution_primary       ?
_atom_sites_solution_secondary     ?
loop_
  _atom_site_label
  _atom_site_type_symbol
  _atom_site_fract_x
  _atom_site_fract_y
  _atom_site_fract_z
  _atom_site_U_iso_or_equiv
  _atom_site_adp_type
  _atom_site_occupancy
  _atom_site_site_symmetry_order
  _atom_site_calc_flag
  _atom_site_refinement_flags_posn
  _atom_site_refinement_flags_adp
  _atom_site_refinement_flags_occupancy
  _atom_site_disorder_assembly
  _atom_site_disorder_group
 K1 K 0.26580(7) 0.69732(7) 0.75137(7) 0.0526(3) Uani 1 1 d . . . . .
 O1 O 0.3581(2) 0.5748(2) 0.6899(2) 0.0633(10) Uani 1 1 d . . . . .
 O2 O 0.1881(2) 0.5497(2) 0.8015(2) 0.0632(10) Uani 1 1 d . . . . .
 O3 O 0.4105(2) 0.7411(2) 0.7761(2) 0.0642(10) Uani 1 1 d . . . . .
 O4 O 0.2618(2) 0.6839(2) 0.9107(2) 0.0623(9) Uani 1 1 d . . . . .
 O5 O 0.2561(2) 0.8371(2) 0.5943(2) 0.0600(9) Uani 1 1 d . . . . .
 O6 O 0.1041(2) 0.8170(2) 0.7305(2) 0.0582(9) Uani 1 1 d . . . . .
 N1 N 0.4337(3) 0.7389(3) 0.6165(3) 0.0578(11) Uani 1 1 d . . . . .
 N2 N 0.0943(3) 0.6611(3) 0.8862(3) 0.0561(11) Uani 1 1 d . . . . .
 C35 C 0.4807(4) 0.6586(3) 0.6093(4) 0.0677(15) Uani 1 1 d . . . . .
 H35A H 0.511223 0.626005 0.654384 0.081 Uiso 1 1 calc R . . . .
 H35B H 0.526793 0.672190 0.558314 0.081 Uiso 1 1 calc R . . . .
 C36 C 0.4176(4) 0.6036(4) 0.6107(4) 0.0673(15) Uani 1 1 d . . . . .
 H36A H 0.382887 0.636471 0.568713 0.081 Uiso 1 1 calc R . . . .
 H36B H 0.452664 0.555215 0.599543 0.081 Uiso 1 1 calc R . . . .
 C37 C 0.2994(4) 0.5190(4) 0.6963(4) 0.0727(17) Uani 1 1 d . . . . .
 H37A H 0.335587 0.473313 0.681219 0.087 Uiso 1 1 calc R . . . .
 H37B H 0.259534 0.550514 0.658466 0.087 Uiso 1 1 calc R . . . .
 C38 C 0.2445(4) 0.4827(3) 0.7813(4) 0.0732(18) Uani 1 1 d . . . . .
 H38A H 0.207322 0.442983 0.785810 0.088 Uiso 1 1 calc R . . . .
 H38B H 0.284238 0.452037 0.819327 0.088 Uiso 1 1 calc R . . . .
 C39 C 0.1274(4) 0.5179(3) 0.8811(4) 0.0705(16) Uani 1 1 d . . . . .
 H39A H 0.160785 0.496547 0.924115 0.085 Uiso 1 1 calc R . . . .
 H39B H 0.098831 0.471521 0.886890 0.085 Uiso 1 1 calc R . . . .
 C40 C 0.0556(4) 0.5907(3) 0.8887(4) 0.0683(16) Uani 1 1 d . . . . .
 H40A H 0.024492 0.612718 0.844138 0.082 Uiso 1 1 calc R . . . .
 H40B H 0.011142 0.569010 0.940189 0.082 Uiso 1 1 calc R . . . .
 C41 C 0.4946(4) 0.7755(4) 0.6374(4) 0.0658(15) Uani 1 1 d . . . . .
 H41A H 0.473572 0.835427 0.624003 0.079 Uiso 1 1 calc R . . . .
 H41B H 0.555183 0.771482 0.603546 0.079 Uiso 1 1 calc R . . . .
 C42 C 0.4997(4) 0.7325(4) 0.7261(4) 0.0683(16) Uani 1 1 d . . . . .
 H42A H 0.521928 0.672629 0.740264 0.082 Uiso 1 1 calc R . . . .
 H42B H 0.541247 0.758464 0.735662 0.082 Uiso 1 1 calc R . . . .
 C43 C 0.4134(4) 0.7159(4) 0.8588(4) 0.0658(15) Uani 1 1 d . . . . .
 H43A H 0.457361 0.745548 0.860798 0.079 Uiso 1 1 calc R . . . .
 H43B H 0.432565 0.655167 0.882981 0.079 Uiso 1 1 calc R . . . .
 C44 C 0.3230(4) 0.7355(4) 0.9068(4) 0.0655(15) Uani 1 1 d . . . . .
 H44A H 0.326889 0.723523 0.961975 0.079 Uiso 1 1 calc R . . . .
 H44B H 0.301301 0.795333 0.880570 0.079 Uiso 1 1 calc R . . . .
 C45 C 0.1762(4) 0.6937(4) 0.9633(4) 0.0666(15) Uani 1 1 d . . . . .
 H45A H 0.149671 0.752714 0.942645 0.080 Uiso 1 1 calc R . . . .
 H45B H 0.183736 0.677683 1.018268 0.080 Uiso 1 1 calc R . . . .
 C46 C 0.1139(4) 0.6368(3) 0.9660(3) 0.0600(14) Uani 1 1 d . . . . .
 H46A H 0.142234 0.578276 0.984925 0.072 Uiso 1 1 calc R . . . .
 H46B H 0.057246 0.639448 1.005485 0.072 Uiso 1 1 calc R . . . .
 C47 C 0.4115(4) 0.8000(3) 0.5371(4) 0.0647(15) Uani 1 1 d . . . . .
 H47A H 0.389719 0.769917 0.514468 0.078 Uiso 1 1 calc R . . . .
 H47B H 0.466230 0.823433 0.498681 0.078 Uiso 1 1 calc R . . . .
 C48 C 0.3402(4) 0.8721(3) 0.5453(4) 0.0672(15) Uani 1 1 d . . . . .
 H48A H 0.359043 0.900015 0.571697 0.081 Uiso 1 1 calc R . . . .
 H48B H 0.332303 0.913852 0.491289 0.081 Uiso 1 1 calc R . . . .
 C49 C 0.1849(4) 0.9038(3) 0.5981(4) 0.0653(15) Uani 1 1 d . . . . .
 H49A H 0.178094 0.943104 0.543017 0.078 Uiso 1 1 calc R . . . .
 H49B H 0.199092 0.935122 0.623829 0.078 Uiso 1 1 calc R . . . .
 C50 C 0.0988(3) 0.8643(3) 0.6477(4) 0.0615(14) Uani 1 1 d . . . . .
 H50A H 0.047740 0.908643 0.644070 0.074 Uiso 1 1 calc R . . . .
 H50B H 0.089021 0.827271 0.625686 0.074 Uiso 1 1 calc R . . . .
 C51 C 0.0218(3) 0.7812(3) 0.7798(4) 0.0578(14) Uani 1 1 d . . . . .
 H51A H 0.011802 0.740705 0.761928 0.069 Uiso 1 1 calc R . . . .
 H51B H -0.028960 0.825959 0.773314 0.069 Uiso 1 1 calc R . . . .
 C52 C 0.0273(3) 0.7374(3) 0.8681(3) 0.0595(14) Uani 1 1 d . . . . .
 H52A H 0.042746 0.777385 0.883648 0.071 Uiso 1 1 calc R . . . .
 H52B H -0.032052 0.721166 0.901766 0.071 Uiso 1 1 calc R . . . .
 K2 K 0.24003(7) 0.80556(6) 0.25892(7) 0.0517(3) Uani 1 1 d . . . . .
 O7 O 0.1634(2) 0.8360(2) 0.1284(2) 0.0592(9) Uani 1 1 d . . . . .
 O8 O 0.0898(2) 0.7271(2) 0.2896(2) 0.0613(10) Uani 1 1 d . . . . .
 O9 O 0.2788(2) 0.9694(2) 0.2090(2) 0.0600(9) Uani 1 1 d . . . . .
 O10 O 0.1629(2) 0.8910(2) 0.3641(2) 0.0628(10) Uani 1 1 d . . . . .
 O11 O 0.4224(2) 0.7437(2) 0.1992(2) 0.0638(10) Uani 1 1 d . . . . .
 O12 O 0.3401(2) 0.6742(2) 0.3714(2) 0.0650(10) Uani 1 1 d . . . . .
 N3 N 0.3398(3) 0.9018(3) 0.0849(3) 0.0609(12) Uani 1 1 d . . . . .
 N4 N 0.1438(3) 0.7076(3) 0.4336(3) 0.0605(12) Uani 1 1 d . . . . .
 C53 C 0.2749(4) 0.9278(4) 0.0319(4) 0.0689(16) Uani 1 1 d . . . . .
 H53A H 0.308301 0.947757 -0.025160 0.083 Uiso 1 1 calc R . . . .
 H53B H 0.232996 0.975436 0.038964 0.083 Uiso 1 1 calc R . . . .
 C54 C 0.2203(4) 0.8585(4) 0.0483(4) 0.0661(15) Uani 1 1 d . . . . .
 H54A H 0.183763 0.878952 0.007768 0.079 Uiso 1 1 calc R . . . .
 H54B H 0.260940 0.809008 0.044182 0.079 Uiso 1 1 calc R . . . .
 C55 C 0.1068(4) 0.7733(3) 0.1453(4) 0.0638(15) Uani 1 1 d . . . . .
 H55A H 0.143795 0.720147 0.147705 0.077 Uiso 1 1 calc R . . . .
 H55B H 0.074181 0.793008 0.102029 0.077 Uiso 1 1 calc R . . . .
 C56 C 0.0413(4) 0.7601(3) 0.2258(4) 0.0631(15) Uani 1 1 d . . . . .
 H56A H 0.005667 0.813740 0.223721 0.076 Uiso 1 1 calc R . . . .
 H56B H 0.000105 0.720391 0.237144 0.076 Uiso 1 1 calc R . . . .
 C57 C 0.0292(4) 0.7000(4) 0.3684(4) 0.0659(15) Uani 1 1 d . . . . .
 H57A H -0.009970 0.662292 0.372104 0.079 Uiso 1 1 calc R . . . .
 H57B H -0.008653 0.748939 0.376433 0.079 Uiso 1 1 calc R . . . .
 C58 C 0.0837(4) 0.6536(3) 0.4344(4) 0.0670(15) Uani 1 1 d . . . . .
 H58A H 0.042135 0.633529 0.487927 0.080 Uiso 1 1 calc R . . . .
 H58B H 0.120223 0.604140 0.426368 0.080 Uiso 1 1 calc R . . . .
 C59 C 0.3708(4) 0.9781(4) 0.0780(4) 0.0696(16) Uani 1 1 d . . . . .
 H59A H 0.385579 1.016570 0.020345 0.084 Uiso 1 1 calc R . . . .
 H59B H 0.425910 0.961052 0.098360 0.084 Uiso 1 1 calc R . . . .
 C60 C 0.3014(4) 1.0252(4) 0.1251(4) 0.0727(17) Uani 1 1 d . . . . .
 H60A H 0.326043 1.073727 0.119439 0.087 Uiso 1 1 calc R . . . .
 H60B H 0.247338 1.046033 0.102851 0.087 Uiso 1 1 calc R . . . .
 C61 C 0.2316(4) 1.0151(3) 0.2581(4) 0.0668(15) Uani 1 1 d . . . . .
 H61A H 0.172957 1.041193 0.244962 0.080 Uiso 1 1 calc R . . . .
 H61B H 0.265967 1.059818 0.247426 0.080 Uiso 1 1 calc R . . . .
 C62 C 0.2192(4) 0.9546(4) 0.3463(4) 0.0713(16) Uani 1 1 d . . . . .
 H62A H 0.277905 0.926953 0.358436 0.086 Uiso 1 1 calc R . . . .
 H62B H 0.190943 0.985609 0.380877 0.086 Uiso 1 1 calc R . . . .
 C63 C 0.1405(4) 0.8419(4) 0.4496(4) 0.0682(15) Uani 1 1 d . . . . .
 H63A H 0.103465 0.877693 0.477343 0.082 Uiso 1 1 calc R . . . .
 H63B H 0.195540 0.818503 0.470241 0.082 Uiso 1 1 calc R . . . .
 C64 C 0.0885(4) 0.7694(3) 0.4678(4) 0.0655(15) Uani 1 1 d . . . . .
 H64A H 0.068208 0.739690 0.526985 0.079 Uiso 1 1 calc R . . . .
 H64B H 0.035009 0.793295 0.444824 0.079 Uiso 1 1 calc R . . . .
 C65 C 0.4179(3) 0.8456(4) 0.0618(4) 0.0678(16) Uani 1 1 d . . . . .
 H65A H 0.456102 0.879326 0.010205 0.081 Uiso 1 1 calc R . . . .
 H65B H 0.396176 0.804089 0.052679 0.081 Uiso 1 1 calc R . . . .
 C66 C 0.4741(4) 0.7994(4) 0.1245(4) 0.0712(16) Uani 1 1 d . . . . .
 H66A H 0.526762 0.766755 0.103610 0.085 Uiso 1 1 calc R . . . .
 H66B H 0.495436 0.840220 0.134878 0.085 Uiso 1 1 calc R . . . .
 C67 C 0.4722(3) 0.7035(4) 0.2620(4) 0.0674(16) Uani 1 1 d . . . . .
 H67A H 0.481837 0.745716 0.277824 0.081 Uiso 1 1 calc R . . . .
 H67B H 0.531166 0.678220 0.240999 0.081 Uiso 1 1 calc R . . . .
 C68 C 0.4226(3) 0.6359(3) 0.3357(4) 0.0656(15) Uani 1 1 d . . . . .
 H68A H 0.409536 0.595267 0.319651 0.079 Uiso 1 1 calc R . . . .
 H68B H 0.460104 0.605498 0.375764 0.079 Uiso 1 1 calc R . . . .
 C69 C 0.2879(4) 0.6109(3) 0.4393(4) 0.0721(17) Uani 1 1 d . . . . .
 H69A H 0.326172 0.571375 0.476441 0.087 Uiso 1 1 calc R . . . .
 H69B H 0.265165 0.578930 0.419330 0.087 Uiso 1 1 calc R . . . .
 C70 C 0.2103(4) 0.6525(4) 0.4842(4) 0.0686(16) Uani 1 1 d . . . . .
 H70A H 0.179506 0.608794 0.533452 0.082 Uiso 1 1 calc R . . . .
 H70B H 0.233578 0.686684 0.501413 0.082 Uiso 1 1 calc R . . . .
 O13 O 0.5694(4) 0.4929(3) 0.7629(4) 0.1058(15) Uani 1 1 d . U . . .
 C71 C 0.5075(5) 0.4600(5) 0.8398(5) 0.103(2) Uani 1 1 d . U . . .
 H71A H 0.484736 0.410441 0.845428 0.124 Uiso 1 1 calc R . . . .
 H71B H 0.456348 0.502685 0.843912 0.124 Uiso 1 1 calc R . . . .
 C72 C 0.5557(6) 0.4365(6) 0.9044(6) 0.116(2) Uani 1 1 d . U . . .
 H72A H 0.531825 0.388568 0.953515 0.139 Uiso 1 1 calc R . . . .
 H72B H 0.551431 0.484026 0.918581 0.139 Uiso 1 1 calc R . . . .
 C73 C 0.6507(5) 0.4131(5) 0.8665(6) 0.113(2) Uani 1 1 d . U . . .
 H73A H 0.660981 0.353782 0.874464 0.136 Uiso 1 1 calc R . . . .
 H73B H 0.693523 0.423331 0.888892 0.136 Uiso 1 1 calc R . . . .
 C74 C 0.6576(5) 0.4709(5) 0.7784(5) 0.104(2) Uani 1 1 d . U . . .
 H74A H 0.682958 0.521873 0.765826 0.125 Uiso 1 1 calc R . . . .
 H74B H 0.697093 0.442754 0.743943 0.125 Uiso 1 1 calc R . . . .
 O14 O 0.0964(4) 0.9177(3) 0.8922(4) 0.1070(15) Uani 1 1 d . U . . .
 C75 C 0.0088(6) 0.9646(5) 0.8982(6) 0.117(2) Uani 1 1 d . U . . .
 H75A H 0.008683 1.012447 0.910685 0.140 Uiso 1 1 calc R . . . .
 H75B H -0.036099 0.928645 0.940677 0.140 Uiso 1 1 calc R . . . .
 C76 C -0.0099(5) 0.9943(5) 0.8161(6) 0.1024(19) Uani 1 1 d . U . . .
 H76A H -0.053799 1.044886 0.804675 0.123 Uiso 1 1 calc R . . . .
 H76B H -0.032264 0.950242 0.811220 0.123 Uiso 1 1 calc R . . . .
 C77 C 0.0810(6) 1.0135(5) 0.7600(5) 0.113(2) Uani 1 1 d . U . . .
 H77A H 0.088053 1.003488 0.711289 0.136 Uiso 1 1 calc R . . . .
 H77B H 0.089944 1.072088 0.743326 0.136 Uiso 1 1 calc R . . . .
 C78 C 0.1447(5) 0.9538(5) 0.8105(5) 0.0972(19) Uani 1 1 d . U . . .
 H78A H 0.173207 0.909462 0.790715 0.117 Uiso 1 1 calc R . . . .
 H78B H 0.191892 0.983753 0.806813 0.117 Uiso 1 1 calc R . . . .
 C1 C 0.5624(3) 0.9168(3) 0.7423(3) 0.0529(13) Uani 1 1 d . . . . .
 C2 C 0.6257(3) 0.9042(3) 0.6761(3) 0.0488(12) Uani 1 1 d . . . . .
 H2 H 0.626230 0.938821 0.620982 0.059 Uiso 1 1 calc R . . . .
 C3 C 0.6890(3) 0.8314(3) 0.7044(3) 0.0481(12) Uani 1 1 d . . . . .
 C4 C 0.6641(3) 0.7979(3) 0.7914(3) 0.0485(12) Uani 1 1 d . . . . .
 C5 C 0.5863(3) 0.8510(3) 0.8134(3) 0.0508(12) Uani 1 1 d . . . . .
 H5 H 0.555853 0.843118 0.867101 0.061 Uiso 1 1 calc R . . . .
 C6 C 0.4835(3) 0.9875(3) 0.7367(4) 0.0577(14) Uani 1 1 d . . . . .
 C7 C 0.5183(4) 1.0748(3) 0.6990(4) 0.0713(17) Uani 1 1 d . . . . .
 H7A H 0.555712 1.084849 0.644864 0.107 Uiso 1 1 calc GR . . . .
 H7B H 0.553341 1.075719 0.733099 0.107 Uiso 1 1 calc GR . . . .
 H7C H 0.467612 1.118475 0.695415 0.107 Uiso 1 1 calc GR . . . .
 C8 C 0.4226(4) 0.9742(4) 0.8202(4) 0.0740(17) Uani 1 1 d . . . . .
 H8A H 0.457680 0.969965 0.856638 0.111 Uiso 1 1 calc GR . . . .
 H8B H 0.395238 0.922577 0.841982 0.111 Uiso 1 1 calc GR . . . .
 H8C H 0.375904 1.021518 0.815364 0.111 Uiso 1 1 calc GR . . . .
 C9 C 0.4267(4) 0.9890(4) 0.6811(4) 0.0816(19) Uani 1 1 d . . . . .
 H9A H 0.404974 0.934596 0.702882 0.122 Uiso 1 1 calc GR . . . .
 H9B H 0.463668 1.000946 0.626491 0.122 Uiso 1 1 calc GR . . . .
 H9C H 0.375935 1.032472 0.679093 0.122 Uiso 1 1 calc GR . . . .
 C10 C 0.7646(3) 0.8052(3) 0.6409(4) 0.0546(13) Uani 1 1 d . . . . .
 C11 C 0.8592(3) 0.8231(4) 0.6374(4) 0.0697(16) Uani 1 1 d . . . . .
 H11A H 0.871116 0.795422 0.691625 0.105 Uiso 1 1 calc GR . . . .
 H11B H 0.860025 0.883477 0.617349 0.105 Uiso 1 1 calc GR . . . .
 H11C H 0.905119 0.801666 0.601127 0.105 Uiso 1 1 calc GR . . . .
 C12 C 0.7490(4) 0.8548(3) 0.5535(4) 0.0683(16) Uani 1 1 d . . . . .
 H12A H 0.750798 0.914405 0.536837 0.102 Uiso 1 1 calc GR . . . .
 H12B H 0.690772 0.846079 0.552456 0.102 Uiso 1 1 calc GR . . . .
 H12C H 0.795691 0.834964 0.516418 0.102 Uiso 1 1 calc GR . . . .
 C13 C 0.7695(3) 0.7106(3) 0.6586(4) 0.0634(15) Uani 1 1 d . . . . .
 H13A H 0.712130 0.699397 0.658143 0.095 Uiso 1 1 calc GR . . . .
 H13B H 0.782983 0.675760 0.711734 0.095 Uiso 1 1 calc GR . . . .
 H13C H 0.816273 0.697565 0.617158 0.095 Uiso 1 1 calc GR . . . .
 C14 C 0.7003(3) 0.7179(3) 0.8601(4) 0.0563(14) Uani 1 1 d . . . . .
 C15 C 0.8042(3) 0.7032(3) 0.8471(4) 0.0696(17) Uani 1 1 d . . . . .
 H15A H 0.825977 0.753369 0.839750 0.104 Uiso 1 1 calc GR . . . .
 H15B H 0.830656 0.691171 0.799051 0.104 Uiso 1 1 calc GR . . . .
 H15C H 0.821005 0.655790 0.894372 0.104 Uiso 1 1 calc GR . . . .
 C16 C 0.6678(4) 0.6357(3) 0.8715(4) 0.0670(16) Uani 1 1 d . . . . .
 H16A H 0.687966 0.628660 0.820579 0.101 Uiso 1 1 calc GR . . . .
 H16B H 0.602724 0.640211 0.887504 0.101 Uiso 1 1 calc GR . . . .
 H16C H 0.692777 0.587415 0.913494 0.101 Uiso 1 1 calc GR . . . .
 C17 C 0.6636(4) 0.7226(3) 0.9450(4) 0.0721(17) Uani 1 1 d . . . . .
 H17A H 0.598509 0.726074 0.959081 0.108 Uiso 1 1 calc GR . . . .
 H17B H 0.681576 0.772273 0.942762 0.108 Uiso 1 1 calc GR . . . .
 H17C H 0.687927 0.672546 0.985941 0.108 Uiso 1 1 calc GR . . . .
 C18 C 0.0533(3) 0.4236(3) 0.7370(3) 0.0465(12) Uani 1 1 d . . . . .
 C19 C 0.0757(3) 0.3583(3) 0.8090(3) 0.0470(12) Uani 1 1 d . . . . .
 H19 H 0.044712 0.351068 0.862372 0.056 Uiso 1 1 calc R . . . .
 C20 C 0.1539(3) 0.3042(3) 0.7873(3) 0.0466(12) Uani 1 1 d . . . . .
 C21 C 0.1788(3) 0.3375(3) 0.6996(3) 0.0486(12) Uani 1 1 d . . . . .
 C22 C 0.1164(3) 0.4107(3) 0.6703(3) 0.0485(12) Uani 1 1 d . . . . .
 H22 H 0.117204 0.445103 0.615050 0.058 Uiso 1 1 calc R . . . .
 C23 C -0.0257(3) 0.4945(3) 0.7300(3) 0.0514(13) Uani 1 1 d . . . . .
 C24 C -0.0824(3) 0.4949(3) 0.6751(4) 0.0604(14) Uani 1 1 d . . . . .
 H24A H -0.101653 0.439555 0.696140 0.091 Uiso 1 1 calc GR . . . .
 H24B H -0.046305 0.508893 0.619941 0.091 Uiso 1 1 calc GR . . . .
 H24C H -0.134728 0.536546 0.674782 0.091 Uiso 1 1 calc GR . . . .
 C25 C -0.0878(3) 0.4828(3) 0.8144(3) 0.0627(15) Uani 1 1 d . . . . .
 H25A H -0.054222 0.485826 0.848529 0.094 Uiso 1 1 calc GR . . . .
 H25B H -0.110076 0.428243 0.839777 0.094 Uiso 1 1 calc GR . . . .
 H25C H -0.138049 0.527000 0.807916 0.094 Uiso 1 1 calc GR . . . .
 C26 C 0.0101(3) 0.5820(3) 0.6907(3) 0.0543(13) Uani 1 1 d . . . . .
 H26A H 0.045174 0.592175 0.635790 0.081 Uiso 1 1 calc GR . . . .
 H26B H 0.047619 0.582491 0.723047 0.081 Uiso 1 1 calc GR . . . .
 H26C H -0.040251 0.625835 0.688806 0.081 Uiso 1 1 calc GR . . . .
 C27 C 0.1907(3) 0.2248(3) 0.8568(3) 0.0528(13) Uani 1 1 d . . . . .
 C28 C 0.1593(4) 0.1428(3) 0.8688(4) 0.0705(17) Uani 1 1 d . . . . .
 H28A H 0.185558 0.131656 0.820289 0.106 Uiso 1 1 calc GR . . . .
 H28B H 0.094247 0.149475 0.878463 0.106 Uiso 1 1 calc GR . . . .
 H28C H 0.178391 0.095916 0.915276 0.106 Uiso 1 1 calc GR . . . .
 C29 C 0.1531(4) 0.2321(4) 0.9399(4) 0.0715(16) Uani 1 1 d . . . . .
 H29A H 0.088684 0.229986 0.955935 0.107 Uiso 1 1 calc GR . . . .
 H29B H 0.165708 0.285217 0.934878 0.107 Uiso 1 1 calc GR . . . .
 H29C H 0.181507 0.185766 0.980760 0.107 Uiso 1 1 calc GR . . . .
 C30 C 0.2943(3) 0.2130(4) 0.8434(4) 0.0721(17) Uani 1 1 d . . . . .
 H30A H 0.313819 0.262549 0.840004 0.108 Uiso 1 1 calc GR . . . .
 H30B H 0.321662 0.205381 0.793185 0.108 Uiso 1 1 calc GR . . . .
 H30C H 0.312450 0.163756 0.888777 0.108 Uiso 1 1 calc GR . . . .
 C31 C 0.2534(3) 0.3087(3) 0.6374(3) 0.0515(12) Uani 1 1 d . . . . .
 C32 C 0.2621(4) 0.2135(3) 0.6588(4) 0.0744(17) Uani 1 1 d . . . . .
 H32A H 0.204602 0.198391 0.663323 0.112 Uiso 1 1 calc GR . . . .
 H32B H 0.280125 0.181683 0.710344 0.112 Uiso 1 1 calc GR . . . .
 H32C H 0.306923 0.200478 0.616307 0.112 Uiso 1 1 calc GR . . . .
 C33 C 0.2332(4) 0.3541(4) 0.5512(4) 0.0680(16) Uani 1 1 d . . . . .
 H33A H 0.230451 0.414583 0.533060 0.102 Uiso 1 1 calc GR . . . .
 H33B H 0.176088 0.340392 0.553118 0.102 Uiso 1 1 calc GR . . . .
 H33C H 0.280541 0.335614 0.513515 0.102 Uiso 1 1 calc GR . . . .
 C34 C 0.3473(3) 0.3323(4) 0.6284(4) 0.0773(18) Uani 1 1 d . . . . .
 H34A H 0.361226 0.308915 0.681669 0.116 Uiso 1 1 calc GR . . . .
 H34B H 0.345810 0.393232 0.604857 0.116 Uiso 1 1 calc GR . . . .
 H34C H 0.393127 0.309462 0.593193 0.116 Uiso 1 1 calc GR . . . .

loop_
  _atom_site_aniso_label
  _atom_site_aniso_U_11
  _atom_site_aniso_U_22
  _atom_site_aniso_U_33
  _atom_site_aniso_U_23
  _atom_site_aniso_U_13
  _atom_site_aniso_U_12
 K1 0.0413(6) 0.0505(6) 0.0685(8) -0.0238(5) -0.0151(5) -0.0066(4)
 O1 0.056(2) 0.064(2) 0.079(3) -0.036(2) -0.014(2) -0.0096(17)
 O2 0.057(2) 0.052(2) 0.087(3) -0.032(2) -0.017(2) -0.0097(17)
 O3 0.043(2) 0.076(2) 0.075(3) -0.029(2) -0.0182(18) -0.0065(17)
 O4 0.052(2) 0.070(2) 0.073(3) -0.036(2) -0.0122(18) -0.0118(17)
 O5 0.0440(19) 0.057(2) 0.072(3) -0.0213(18) -0.0077(17) -0.0085(15)
 O6 0.0411(18) 0.060(2) 0.072(3) -0.0235(19) -0.0130(17) -0.0081(15)
 N1 0.046(2) 0.063(3) 0.066(3) -0.027(2) -0.015(2) -0.007(2)
 N2 0.052(2) 0.052(2) 0.066(3) -0.023(2) -0.012(2) -0.0105(19)
 C35 0.051(3) 0.068(4) 0.085(5) -0.034(3) -0.015(3) -0.004(3)
 C36 0.071(4) 0.066(3) 0.073(4) -0.039(3) -0.018(3) 0.002(3)
 C37 0.056(3) 0.067(4) 0.116(6) -0.058(4) -0.019(4) -0.003(3)
 C38 0.057(3) 0.053(3) 0.121(6) -0.043(4) -0.029(4) -0.001(3)
 C39 0.073(4) 0.055(3) 0.085(5) -0.026(3) -0.020(3) -0.012(3)
 C40 0.059(3) 0.067(3) 0.079(4) -0.025(3) -0.011(3) -0.025(3)
 C41 0.048(3) 0.071(4) 0.074(4) -0.025(3) -0.007(3) -0.018(3)
 C42 0.050(3) 0.073(4) 0.085(5) -0.032(3) -0.014(3) -0.013(3)
 C43 0.056(3) 0.069(3) 0.084(5) -0.035(3) -0.025(3) -0.007(3)
 C44 0.064(3) 0.069(3) 0.079(4) -0.041(3) -0.017(3) -0.011(3)
 C45 0.061(3) 0.074(4) 0.070(4) -0.034(3) -0.017(3) -0.004(3)
 C46 0.055(3) 0.063(3) 0.054(4) -0.018(3) -0.006(3) -0.012(2)
 C47 0.065(4) 0.063(3) 0.061(4) -0.021(3) -0.014(3) -0.007(3)
 C48 0.062(3) 0.057(3) 0.071(4) -0.014(3) -0.013(3) -0.012(3)
 C49 0.058(3) 0.056(3) 0.075(4) -0.018(3) -0.020(3) -0.005(2)
 C50 0.053(3) 0.061(3) 0.068(4) -0.022(3) -0.018(3) -0.003(2)
 C51 0.040(3) 0.057(3) 0.082(4) -0.033(3) -0.011(3) -0.009(2)
 C52 0.044(3) 0.070(3) 0.067(4) -0.032(3) -0.006(3) -0.011(2)
 K2 0.0415(6) 0.0479(6) 0.0692(8) -0.0247(5) -0.0166(5) -0.0041(4)
 O7 0.056(2) 0.060(2) 0.072(3) -0.0322(19) -0.0214(19) -0.0039(16)
 O8 0.048(2) 0.067(2) 0.075(3) -0.0286(19) -0.0217(19) -0.0078(16)
 O9 0.062(2) 0.0485(19) 0.071(3) -0.0222(19) -0.0201(19) -0.0067(16)
 O10 0.060(2) 0.063(2) 0.073(3) -0.029(2) -0.0147(19) -0.0192(17)
 O11 0.047(2) 0.066(2) 0.077(3) -0.025(2) -0.0246(19) 0.0010(17)
 O12 0.049(2) 0.059(2) 0.077(3) -0.0202(19) -0.0145(18) -0.0038(17)
 N3 0.048(2) 0.062(3) 0.071(3) -0.025(2) -0.019(2) -0.001(2)
 N4 0.053(3) 0.058(3) 0.075(3) -0.027(2) -0.022(2) -0.007(2)
 C53 0.058(3) 0.074(4) 0.065(4) -0.021(3) -0.013(3) -0.005(3)
 C54 0.062(3) 0.083(4) 0.061(4) -0.032(3) -0.022(3) -0.005(3)
 C55 0.067(4) 0.060(3) 0.076(4) -0.030(3) -0.031(3) -0.005(3)
 C56 0.064(3) 0.046(3) 0.093(5) -0.031(3) -0.038(3) 0.002(2)
 C57 0.056(3) 0.068(4) 0.079(5) -0.034(3) -0.009(3) -0.018(3)
 C58 0.056(3) 0.065(3) 0.082(4) -0.025(3) -0.015(3) -0.021(3)
 C59 0.062(4) 0.065(4) 0.075(4) -0.020(3) -0.010(3) -0.018(3)
 C60 0.073(4) 0.056(3) 0.085(5) -0.022(3) -0.025(3) -0.006(3)
 C61 0.066(4) 0.059(3) 0.087(5) -0.035(3) -0.019(3) -0.013(3)
 C62 0.067(4) 0.070(4) 0.092(5) -0.044(4) -0.015(3) -0.015(3)
 C63 0.076(4) 0.070(4) 0.063(4) -0.029(3) -0.009(3) -0.022(3)
 C64 0.060(3) 0.061(3) 0.075(4) -0.031(3) -0.006(3) -0.013(3)
 C65 0.049(3) 0.074(4) 0.071(4) -0.025(3) -0.009(3) -0.005(3)
 C66 0.050(3) 0.078(4) 0.072(4) -0.022(3) -0.016(3) 0.003(3)
 C67 0.043(3) 0.071(4) 0.080(4) -0.024(3) -0.024(3) 0.010(3)
 C68 0.053(3) 0.056(3) 0.081(4) -0.022(3) -0.024(3) 0.007(2)
 C69 0.075(4) 0.057(3) 0.071(4) -0.005(3) -0.027(3) -0.012(3)
 C70 0.061(3) 0.066(3) 0.071(4) -0.019(3) -0.019(3) -0.004(3)
 O13 0.097(3) 0.094(3) 0.118(4) -0.032(3) -0.040(3) 0.000(3)
 C71 0.093(4) 0.098(4) 0.122(5) -0.041(4) -0.038(4) -0.010(3)
 C72 0.105(4) 0.119(4) 0.127(5) -0.041(4) -0.040(4) -0.021(4)
 C73 0.095(4) 0.110(4) 0.140(5) -0.037(4) -0.059(4) -0.008(4)
 C74 0.097(4) 0.102(4) 0.132(5) -0.049(4) -0.045(4) -0.017(3)
 O14 0.113(4) 0.090(3) 0.124(4) -0.040(3) -0.054(3) 0.005(3)
 C75 0.115(5) 0.083(4) 0.146(5) -0.045(4) -0.025(4) -0.009(4)
 C76 0.102(4) 0.079(4) 0.158(5) -0.063(4) -0.062(4) 0.005(3)
 C77 0.128(5) 0.086(4) 0.129(5) -0.062(4) -0.033(4) 0.024(4)
 C78 0.100(4) 0.084(4) 0.130(5) -0.058(4) -0.042(4) 0.000(3)
 C1 0.043(3) 0.045(3) 0.073(4) -0.026(3) -0.014(3) -0.003(2)
 C2 0.034(2) 0.046(3) 0.061(4) -0.020(2) -0.008(2) -0.0019(19)
 C3 0.034(2) 0.041(2) 0.075(4) -0.029(3) -0.016(2) -0.0009(19)
 C4 0.039(2) 0.041(2) 0.073(4) -0.025(3) -0.021(2) -0.0031(19)
 C5 0.040(3) 0.045(3) 0.071(4) -0.027(3) -0.014(2) -0.002(2)
 C6 0.045(3) 0.052(3) 0.076(4) -0.031(3) -0.013(3) 0.006(2)
 C7 0.054(3) 0.050(3) 0.104(5) -0.030(3) -0.021(3) 0.006(2)
 C8 0.057(3) 0.061(3) 0.090(5) -0.029(3) -0.006(3) 0.003(3)
 C9 0.062(4) 0.078(4) 0.111(6) -0.045(4) -0.037(4) 0.015(3)
 C10 0.039(3) 0.049(3) 0.080(4) -0.033(3) -0.014(2) 0.001(2)
 C11 0.037(3) 0.074(4) 0.102(5) -0.044(3) -0.008(3) -0.004(2)
 C12 0.060(3) 0.061(3) 0.080(5) -0.034(3) -0.007(3) -0.001(3)
 C13 0.050(3) 0.050(3) 0.092(5) -0.034(3) -0.014(3) 0.001(2)
 C14 0.043(3) 0.048(3) 0.081(4) -0.025(3) -0.024(3) -0.002(2)
 C15 0.050(3) 0.064(3) 0.096(5) -0.026(3) -0.034(3) 0.000(2)
 C16 0.054(3) 0.047(3) 0.096(5) -0.024(3) -0.023(3) 0.001(2)
 C17 0.074(4) 0.056(3) 0.087(5) -0.021(3) -0.037(3) -0.002(3)
 C18 0.035(2) 0.038(2) 0.066(4) -0.020(2) -0.014(2) -0.0006(18)
 C19 0.039(2) 0.043(3) 0.064(4) -0.027(2) -0.011(2) -0.0043(19)
 C20 0.037(2) 0.036(2) 0.070(4) -0.022(2) -0.020(2) 0.0009(19)
 C21 0.030(2) 0.041(2) 0.076(4) -0.027(3) -0.016(2) 0.0064(18)
 C22 0.041(3) 0.044(3) 0.064(4) -0.027(2) -0.012(2) -0.001(2)
 C23 0.042(3) 0.041(3) 0.068(4) -0.019(2) -0.015(2) -0.001(2)
 C24 0.041(3) 0.051(3) 0.087(4) -0.028(3) -0.023(3) 0.007(2)
 C25 0.047(3) 0.049(3) 0.078(4) -0.021(3) -0.009(3) 0.007(2)
 C26 0.048(3) 0.042(3) 0.069(4) -0.022(2) -0.011(2) -0.002(2)
 C27 0.036(2) 0.049(3) 0.074(4) -0.025(3) -0.021(2) 0.004(2)
 C28 0.069(4) 0.048(3) 0.090(5) -0.018(3) -0.032(3) -0.002(3)
 C29 0.065(4) 0.066(4) 0.076(5) -0.020(3) -0.025(3) 0.000(3)
 C30 0.044(3) 0.070(4) 0.094(5) -0.020(3) -0.030(3) 0.001(2)
 C31 0.036(2) 0.054(3) 0.072(4) -0.034(3) -0.015(2) 0.002(2)
 C32 0.071(4) 0.064(4) 0.099(5) -0.049(3) -0.017(3) 0.003(3)
 C33 0.056(3) 0.069(4) 0.079(5) -0.036(3) -0.012(3) 0.001(3)
 C34 0.043(3) 0.099(5) 0.104(5) -0.059(4) -0.007(3) -0.008(3)

_geom_special_details
;
 All esds (except the esd in the dihedral angle between two l.s. planes)
 are estimated using the full covariance matrix.  The cell esds are taken
 into account individually in the estimation of esds in distances, angles
 and torsion angles; correlations between esds in cell parameters are only
 used when they are defined by crystal symmetry.  An approximate (isotropic)
 treatment of cell esds is used for estimating esds involving l.s. planes.
;
loop_
  _geom_bond_atom_site_label_1
  _geom_bond_atom_site_label_2
  _geom_bond_distance
  _geom_bond_site_symmetry_2
  _geom_bond_publ_flag
 K1 O1 2.796(4) . ?
 K1 O2 2.782(4) . ?
 K1 O3 2.759(4) . ?
 K1 O4 2.852(4) . ?
 K1 O5 2.884(4) . ?
 K1 O6 2.881(3) . ?
 K1 N1 2.993(5) . ?
 K1 N2 3.025(5) . ?
 O1 C36 1.421(7) . ?
 O1 C37 1.439(6) . ?
 O2 C38 1.422(6) . ?
 O2 C39 1.438(7) . ?
 O3 C42 1.437(7) . ?
 O3 C43 1.413(7) . ?
 O4 C44 1.429(6) . ?
 O4 C45 1.422(6) . ?
 O5 C48 1.442(6) . ?
 O5 C49 1.426(6) . ?
 O6 C50 1.407(6) . ?
 O6 C51 1.425(6) . ?
 N1 C35 1.480(6) . ?
 N1 C41 1.481(6) . ?
 N1 C47 1.476(7) . ?
 N2 C40 1.479(6) . ?
 N2 C46 1.458(7) . ?
 N2 C52 1.472(6) . ?
 C35 C36 1.521(7) . ?
 C37 C38 1.476(9) . ?
 C39 C40 1.522(7) . ?
 C41 C42 1.496(8) . ?
 C43 C44 1.478(7) . ?
 C45 C46 1.525(7) . ?
 C47 C48 1.511(7) . ?
 C49 C50 1.499(7) . ?
 C51 C52 1.494(7) . ?
 K2 O7 2.810(4) . ?
 K2 O8 2.774(4) . ?
 K2 O9 2.769(4) . ?
 K2 O10 2.816(4) . ?
 K2 O11 2.865(4) . ?
 K2 O12 2.850(4) . ?
 K2 N3 3.014(5) . ?
 K2 N4 3.011(5) . ?
 O7 C54 1.416(7) . ?
 O7 C55 1.440(6) . ?
 O8 C56 1.426(6) . ?
 O8 C57 1.422(7) . ?
 O9 C60 1.411(7) . ?
 O9 C61 1.416(6) . ?
 O10 C62 1.443(6) . ?
 O10 C63 1.408(7) . ?
 O11 C66 1.423(7) . ?
 O11 C67 1.421(6) . ?
 O12 C68 1.424(6) . ?
 O12 C69 1.431(7) . ?
 N3 C53 1.476(7) . ?
 N3 C59 1.474(7) . ?
 N3 C65 1.466(6) . ?
 N4 C58 1.475(6) . ?
 N4 C64 1.479(7) . ?
 N4 C70 1.484(6) . ?
 C53 C54 1.518(8) . ?
 C55 C56 1.489(8) . ?
 C57 C58 1.516(8) . ?
 C59 C60 1.512(8) . ?
 C61 C62 1.487(8) . ?
 C63 C64 1.528(7) . ?
 C65 C66 1.490(7) . ?
 C67 C68 1.494(8) . ?
 C69 C70 1.492(8) . ?
 O13 C71 1.416(9) . ?
 O13 C74 1.414(8) . ?
 C71 C72 1.460(10) . ?
 C72 C73 1.481(11) . ?
 C73 C74 1.482(11) . ?
 O14 C75 1.421(9) . ?
 O14 C78 1.398(9) . ?
 C75 C76 1.477(10) . ?
 C76 C77 1.490(11) . ?
 C77 C78 1.471(9) . ?
 C1 C2 1.396(7) . ?
 C1 C5 1.401(7) . ?
 C1 C6 1.523(6) . ?
 C2 C3 1.420(6) . ?
 C3 C4 1.413(7) . ?
 C3 C10 1.548(7) . ?
 C4 C5 1.423(6) . ?
 C4 C14 1.547(7) . ?
 C6 C7 1.535(7) . ?
 C6 C8 1.504(8) . ?
 C6 C9 1.539(8) . ?
 C10 C11 1.552(7) . ?
 C10 C12 1.529(8) . ?
 C10 C13 1.538(6) . ?
 C14 C15 1.537(7) . ?
 C14 C16 1.550(7) . ?
 C14 C17 1.546(8) . ?
 C18 C19 1.400(7) . ?
 C18 C22 1.404(7) . ?
 C18 C23 1.525(6) . ?
 C19 C20 1.435(6) . ?
 C20 C21 1.425(7) . ?
 C20 C27 1.554(7) . ?
 C21 C22 1.419(6) . ?
 C21 C31 1.544(7) . ?
 C23 C24 1.534(7) . ?
 C23 C25 1.529(7) . ?
 C23 C26 1.542(6) . ?
 C27 C28 1.536(7) . ?
 C27 C29 1.533(8) . ?
 C27 C30 1.532(6) . ?
 C31 C32 1.527(7) . ?
 C31 C33 1.535(7) . ?
 C31 C34 1.552(7) . ?

loop_
  _geom_angle_atom_site_label_1
  _geom_angle_atom_site_label_2
  _geom_angle_atom_site_label_3
  _geom_angle
  _geom_angle_site_symmetry_1
  _geom_angle_site_symmetry_3
  _geom_angle_publ_flag
 O1 K1 O4 124.01(11) . . ?
 O1 K1 O5 96.75(11) . . ?
 O1 K1 O6 135.64(11) . . ?
 O1 K1 N1 61.24(12) . . ?
 O1 K1 N2 120.41(11) . . ?
 O2 K1 O1 60.59(11) . . ?
 O2 K1 O4 97.81(11) . . ?
 O2 K1 O5 120.98(11) . . ?
 O2 K1 O6 98.13(10) . . ?
 O2 K1 N1 121.33(12) . . ?
 O2 K1 N2 60.22(11) . . ?
 O3 K1 O1 99.41(11) . . ?
 O3 K1 O2 137.20(11) . . ?
 O3 K1 O4 60.45(11) . . ?
 O3 K1 O5 97.33(11) . . ?
 O3 K1 O6 118.96(11) . . ?
 O3 K1 N1 60.39(12) . . ?
 O3 K1 N2 119.26(12) . . ?
 O4 K1 O5 134.73(11) . . ?
 O4 K1 O6 95.49(11) . . ?
 O4 K1 N1 120.46(11) . . ?
 O4 K1 N2 59.44(11) . . ?
 O5 K1 N1 59.87(10) . . ?
 O5 K1 N2 118.79(11) . . ?
 O6 K1 O5 59.25(10) . . ?
 O6 K1 N1 118.21(11) . . ?
 O6 K1 N2 60.27(11) . . ?
 N1 K1 N2 178.23(12) . . ?
 C36 O1 K1 117.5(3) . . ?
 C36 O1 C37 110.7(4) . . ?
 C37 O1 K1 113.0(3) . . ?
 C38 O2 K1 117.0(3) . . ?
 C38 O2 C39 112.1(4) . . ?
 C39 O2 K1 119.3(3) . . ?
 C42 O3 K1 119.4(3) . . ?
 C43 O3 K1 116.4(3) . . ?
 C43 O3 C42 111.4(4) . . ?
 C44 O4 K1 111.7(3) . . ?
 C45 O4 K1 118.6(3) . . ?
 C45 O4 C44 110.8(4) . . ?
 C48 O5 K1 115.7(3) . . ?
 C49 O5 K1 114.3(3) . . ?
 C49 O5 C48 110.3(4) . . ?
 C50 O6 K1 113.5(3) . . ?
 C50 O6 C51 111.2(4) . . ?
 C51 O6 K1 114.4(3) . . ?
 C35 N1 K1 107.8(3) . . ?
 C35 N1 C41 109.1(4) . . ?
 C41 N1 K1 110.0(3) . . ?
 C47 N1 K1 111.3(3) . . ?
 C47 N1 C35 109.3(4) . . ?
 C47 N1 C41 109.3(4) . . ?
 C40 N2 K1 109.3(3) . . ?
 C46 N2 K1 110.6(3) . . ?
 C46 N2 C40 109.1(4) . . ?
 C46 N2 C52 110.0(4) . . ?
 C52 N2 K1 109.4(3) . . ?
 C52 N2 C40 108.5(4) . . ?
 N1 C35 C36 113.7(4) . . ?
 O1 C36 C35 108.1(5) . . ?
 O1 C37 C38 110.2(5) . . ?
 O2 C38 C37 109.4(5) . . ?
 O2 C39 C40 108.2(4) . . ?
 N2 C40 C39 112.7(4) . . ?
 N1 C41 C42 113.8(5) . . ?
 O3 C42 C41 108.8(4) . . ?
 O3 C43 C44 110.5(4) . . ?
 O4 C44 C43 108.4(4) . . ?
 O4 C45 C46 108.7(4) . . ?
 N2 C46 C45 113.0(4) . . ?
 N1 C47 C48 112.5(5) . . ?
 O5 C48 C47 108.3(4) . . ?
 O5 C49 C50 108.2(4) . . ?
 O6 C50 C49 110.0(4) . . ?
 O6 C51 C52 109.6(4) . . ?
 N2 C52 C51 113.9(4) . . ?
 O7 K2 O10 121.09(11) . . ?
 O7 K2 O11 99.68(11) . . ?
 O7 K2 O12 140.94(11) . . ?
 O7 K2 N3 61.23(11) . . ?
 O7 K2 N4 119.60(11) . . ?
 O8 K2 O7 60.13(11) . . ?
 O8 K2 O10 97.46(11) . . ?
 O8 K2 O11 123.47(11) . . ?
 O8 K2 O12 101.32(11) . . ?
 O8 K2 N3 120.70(12) . . ?
 O8 K2 N4 60.00(11) . . ?
 O9 K2 O7 98.13(11) . . ?
 O9 K2 O8 137.29(11) . . ?
 O9 K2 O10 60.71(11) . . ?
 O9 K2 O11 94.59(11) . . ?
 O9 K2 O12 115.39(11) . . ?
 O9 K2 N3 59.51(12) . . ?
 O9 K2 N4 120.67(12) . . ?
 O10 K2 O11 133.51(11) . . ?
 O10 K2 O12 93.72(11) . . ?
 O10 K2 N3 119.58(12) . . ?
 O10 K2 N4 60.78(11) . . ?
 O11 K2 N3 59.93(11) . . ?
 O11 K2 N4 119.03(11) . . ?
 O12 K2 O11 60.05(11) . . ?
 O12 K2 N3 118.78(11) . . ?
 O12 K2 N4 60.14(11) . . ?
 N4 K2 N3 178.91(12) . . ?
 C54 O7 K2 118.3(3) . . ?
 C54 O7 C55 110.9(4) . . ?
 C55 O7 K2 114.7(3) . . ?
 C56 O8 K2 116.9(3) . . ?
 C57 O8 K2 121.2(3) . . ?
 C57 O8 C56 110.7(4) . . ?
 C60 O9 K2 122.1(3) . . ?
 C60 O9 C61 111.0(4) . . ?
 C61 O9 K2 118.5(3) . . ?
 C62 O10 K2 109.9(3) . . ?
 C63 O10 K2 118.3(3) . . ?
 C63 O10 C62 110.0(4) . . ?
 C66 O11 K2 118.3(3) . . ?
 C67 O11 K2 111.9(3) . . ?
 C67 O11 C66 111.7(4) . . ?
 C68 O12 K2 116.1(3) . . ?
 C68 O12 C69 111.0(4) . . ?
 C69 O12 K2 115.2(3) . . ?
 C53 N3 K2 106.9(3) . . ?
 C59 N3 K2 110.4(3) . . ?
 C59 N3 C53 109.6(4) . . ?
 C65 N3 K2 109.0(3) . . ?
 C65 N3 C53 111.0(5) . . ?
 C65 N3 C59 109.9(4) . . ?
 C58 N4 K2 109.5(3) . . ?
 C58 N4 C70 108.9(4) . . ?
 C64 N4 K2 108.4(3) . . ?
 C64 N4 C58 109.3(4) . . ?
 C64 N4 C70 110.1(4) . . ?
 C70 N4 K2 110.6(3) . . ?
 N3 C53 C54 115.1(5) . . ?
 O7 C54 C53 108.8(4) . . ?
 O7 C55 C56 108.3(4) . . ?
 O8 C56 C55 109.5(4) . . ?
 O8 C57 C58 109.3(4) . . ?
 N4 C58 C57 112.9(4) . . ?
 N3 C59 C60 113.5(5) . . ?
 O9 C60 C59 109.3(4) . . ?
 O9 C61 C62 108.5(4) . . ?
 O10 C62 C61 110.4(5) . . ?
 O10 C63 C64 110.0(4) . . ?
 N4 C64 C63 112.8(5) . . ?
 N3 C65 C66 114.0(5) . . ?
 O11 C66 C65 110.4(5) . . ?
 O11 C67 C68 111.0(4) . . ?
 O12 C68 C67 109.4(4) . . ?
 O12 C69 C70 109.9(5) . . ?
 N4 C70 C69 112.8(5) . . ?
 C74 O13 C71 107.3(6) . . ?
 O13 C71 C72 107.8(7) . . ?
 C71 C72 C73 103.3(7) . . ?
 C72 C73 C74 102.3(6) . . ?
 O13 C74 C73 108.2(7) . . ?
 C78 O14 C75 107.7(6) . . ?
 O14 C75 C76 104.1(7) . . ?
 C75 C76 C77 102.6(6) . . ?
 C78 C77 C76 103.6(7) . . ?
 O14 C78 C77 108.5(7) . . ?
 C2 C1 C5 105.9(4) . . ?
 C2 C1 C6 126.2(5) . . ?
 C5 C1 C6 127.9(5) . . ?
 C1 C2 C3 110.8(5) . . ?
 C2 C3 C10 119.3(5) . . ?
 C4 C3 C2 106.3(4) . . ?
 C4 C3 C10 134.4(4) . . ?
 C3 C4 C5 107.1(4) . . ?
 C3 C4 C14 133.5(4) . . ?
 C5 C4 C14 119.2(5) . . ?
 C1 C5 C4 109.9(5) . . ?
 C1 C6 C7 110.8(4) . . ?
 C1 C6 C9 109.7(4) . . ?
 C7 C6 C9 107.9(5) . . ?
 C8 C6 C1 111.3(5) . . ?
 C8 C6 C7 108.7(5) . . ?
 C8 C6 C9 108.4(5) . . ?
 C3 C10 C11 111.6(4) . . ?
 C12 C10 C3 112.0(4) . . ?
 C12 C10 C11 106.2(5) . . ?
 C12 C10 C13 105.5(4) . . ?
 C13 C10 C3 112.4(4) . . ?
 C13 C10 C11 108.8(4) . . ?
 C4 C14 C16 111.9(4) . . ?
 C15 C14 C4 114.4(5) . . ?
 C15 C14 C16 107.9(4) . . ?
 C15 C14 C17 105.6(4) . . ?
 C17 C14 C4 111.6(4) . . ?
 C17 C14 C16 104.7(5) . . ?
 C19 C18 C22 107.0(4) . . ?
 C19 C18 C23 127.7(5) . . ?
 C22 C18 C23 125.3(5) . . ?
 C18 C19 C20 109.2(5) . . ?
 C19 C20 C27 119.3(5) . . ?
 C21 C20 C19 106.9(4) . . ?
 C21 C20 C27 133.8(4) . . ?
 C20 C21 C31 133.6(4) . . ?
 C22 C21 C20 106.9(4) . . ?
 C22 C21 C31 119.5(5) . . ?
 C18 C22 C21 109.9(5) . . ?
 C18 C23 C24 110.1(4) . . ?
 C18 C23 C25 111.3(4) . . ?
 C18 C23 C26 110.3(4) . . ?
 C24 C23 C26 108.0(4) . . ?
 C25 C23 C24 108.4(4) . . ?
 C25 C23 C26 108.6(4) . . ?
 C28 C27 C20 111.5(4) . . ?
 C29 C27 C20 110.7(4) . . ?
 C29 C27 C28 105.4(5) . . ?
 C29 C27 C30 105.8(4) . . ?
 C30 C27 C20 113.7(4) . . ?
 C30 C27 C28 109.2(4) . . ?
 C21 C31 C34 111.3(4) . . ?
 C32 C31 C21 113.7(5) . . ?
 C32 C31 C33 105.7(4) . . ?
 C32 C31 C34 108.7(4) . . ?
 C33 C31 C21 110.8(4) . . ?
 C33 C31 C34 106.1(5) . . ?

_shelx_res_file
;
TITL rdpm103_a.res in P-1
    rdpm103.res
    created by SHELXL-2018/3 at 17:27:25 on 18-Jun-2018
REM Old TITL rdpm103 in P-1 #2
REM SHELXT solution in P-1
REM R1 0.253, Rweak 0.034, Alpha 0.070, Orientation as input
REM Formula found by SHELXT: C78 N5 O13 K2
CELL 1.54184 15.540733 17.650461 18.623821 63.4841 72.4957 76.5111
ZERR 4 0.001679 0.0016 0.001995 0.0099 0.0096 0.0088
LATT 1
SFAC C H K N O
UNIT 156 292 4 8 28
SIMU 0.008 0.008 2 C73 O13 C71 C74 C72 O14 C75 C78 C76 C77
RIGU 0.008 0.008 C71 O13 C74 C72 C73 O14 C75 C78 C76 C77

L.S. 20
PLAN  20
list 4
fmap 2
acta
SHEL 100 0.83
OMIT 5 2 13
OMIT 3 3 14
REM <olex2.extras>
REM <HklSrc "%.\\rdpm103.hkl">
REM </olex2.extras>

WGHT    0.105800
FVAR       2.34024
K1    3    0.265798    0.697324    0.751368    11.00000    0.04129    0.05046 =
         0.06848   -0.02377   -0.01513   -0.00661
O1    5    0.358132    0.574848    0.689921    11.00000    0.05580    0.06356 =
         0.07895   -0.03559   -0.01401   -0.00956
O2    5    0.188127    0.549677    0.801505    11.00000    0.05700    0.05223 =
         0.08749   -0.03219   -0.01726   -0.00967
O3    5    0.410462    0.741130    0.776076    11.00000    0.04328    0.07573 =
         0.07469   -0.02853   -0.01822   -0.00648
O4    5    0.261833    0.683866    0.910691    11.00000    0.05234    0.07039 =
         0.07289   -0.03562   -0.01220   -0.01177
O5    5    0.256065    0.837119    0.594251    11.00000    0.04399    0.05655 =
         0.07168   -0.02131   -0.00766   -0.00852
O6    5    0.104125    0.816978    0.730521    11.00000    0.04106    0.05954 =
         0.07188   -0.02352   -0.01305   -0.00810
N1    4    0.433708    0.738941    0.616516    11.00000    0.04628    0.06329 =
         0.06612   -0.02665   -0.01500   -0.00656
N2    4    0.094322    0.661088    0.886230    11.00000    0.05154    0.05224 =
         0.06552   -0.02309   -0.01246   -0.01051
C35   1    0.480695    0.658581    0.609340    11.00000    0.05118    0.06758 =
         0.08515   -0.03351   -0.01470   -0.00381
AFIX  23
H35A  2    0.511223    0.626005    0.654384    11.00000   -1.20000
H35B  2    0.526793    0.672190    0.558314    11.00000   -1.20000
AFIX   0
C36   1    0.417600    0.603560    0.610660    11.00000    0.07119    0.06600 =
         0.07280   -0.03916   -0.01781    0.00227
AFIX  23
H36A  2    0.382887    0.636471    0.568713    11.00000   -1.20000
H36B  2    0.452664    0.555215    0.599543    11.00000   -1.20000
AFIX   0
C37   1    0.299392    0.519005    0.696279    11.00000    0.05647    0.06708 =
         0.11575   -0.05821   -0.01884   -0.00257
AFIX  23
H37A  2    0.335587    0.473313    0.681219    11.00000   -1.20000
H37B  2    0.259534    0.550514    0.658466    11.00000   -1.20000
AFIX   0
C38   1    0.244542    0.482737    0.781262    11.00000    0.05663    0.05328 =
         0.12146   -0.04253   -0.02867   -0.00147
AFIX  23
H38A  2    0.207322    0.442983    0.785810    11.00000   -1.20000
H38B  2    0.284238    0.452037    0.819327    11.00000   -1.20000
AFIX   0
C39   1    0.127422    0.517875    0.881132    11.00000    0.07251    0.05525 =
         0.08501   -0.02617   -0.02018   -0.01150
AFIX  23
H39A  2    0.160785    0.496547    0.924115    11.00000   -1.20000
H39B  2    0.098831    0.471521    0.886890    11.00000   -1.20000
AFIX   0
C40   1    0.055649    0.590721    0.888721    11.00000    0.05947    0.06653 =
         0.07916   -0.02456   -0.01077   -0.02455
AFIX  23
H40A  2    0.024492    0.612718    0.844138    11.00000   -1.20000
H40B  2    0.011142    0.569010    0.940189    11.00000   -1.20000
AFIX   0
C41   1    0.494598    0.775466    0.637426    11.00000    0.04754    0.07132 =
         0.07449   -0.02468   -0.00745   -0.01792
AFIX  23
H41A  2    0.473572    0.835427    0.624003    11.00000   -1.20000
H41B  2    0.555183    0.771482    0.603546    11.00000   -1.20000
AFIX   0
C42   1    0.499663    0.732487    0.726054    11.00000    0.04971    0.07328 =
         0.08464   -0.03223   -0.01438   -0.01254
AFIX  23
H42A  2    0.521928    0.672629    0.740264    11.00000   -1.20000
H42B  2    0.541247    0.758464    0.735662    11.00000   -1.20000
AFIX   0
C43   1    0.413399    0.715888    0.858847    11.00000    0.05592    0.06874 =
         0.08396   -0.03513   -0.02531   -0.00659
AFIX  23
H43A  2    0.457361    0.745548    0.860798    11.00000   -1.20000
H43B  2    0.432565    0.655167    0.882981    11.00000   -1.20000
AFIX   0
C44   1    0.323002    0.735471    0.906829    11.00000    0.06379    0.06906 =
         0.07903   -0.04082   -0.01741   -0.01141
AFIX  23
H44A  2    0.326889    0.723523    0.961975    11.00000   -1.20000
H44B  2    0.301301    0.795333    0.880570    11.00000   -1.20000
AFIX   0
C45   1    0.176171    0.693665    0.963287    11.00000    0.06063    0.07354 =
         0.07016   -0.03351   -0.01711   -0.00364
AFIX  23
H45A  2    0.149671    0.752714    0.942645    11.00000   -1.20000
H45B  2    0.183736    0.677683    1.018268    11.00000   -1.20000
AFIX   0
C46   1    0.113914    0.636792    0.965977    11.00000    0.05497    0.06272 =
         0.05435   -0.01827   -0.00617   -0.01216
AFIX  23
H46A  2    0.142234    0.578276    0.984925    11.00000   -1.20000
H46B  2    0.057246    0.639448    1.005485    11.00000   -1.20000
AFIX   0
C47   1    0.411472    0.799958    0.537061    11.00000    0.06532    0.06251 =
         0.06102   -0.02103   -0.01388   -0.00655
AFIX  23
H47A  2    0.389719    0.769917    0.514468    11.00000   -1.20000
H47B  2    0.466230    0.823433    0.498681    11.00000   -1.20000
AFIX   0
C48   1    0.340230    0.872057    0.545305    11.00000    0.06191    0.05667 =
         0.07091   -0.01404   -0.01303   -0.01215
AFIX  23
H48A  2    0.359043    0.900015    0.571697    11.00000   -1.20000
H48B  2    0.332303    0.913852    0.491289    11.00000   -1.20000
AFIX   0
C49   1    0.184930    0.903780    0.598103    11.00000    0.05757    0.05556 =
         0.07546   -0.01802   -0.01967   -0.00510
AFIX  23
H49A  2    0.178094    0.943104    0.543017    11.00000   -1.20000
H49B  2    0.199092    0.935122    0.623829    11.00000   -1.20000
AFIX   0
C50   1    0.098759    0.864322    0.647676    11.00000    0.05309    0.06087 =
         0.06770   -0.02245   -0.01824   -0.00287
AFIX  23
H50A  2    0.047740    0.908643    0.644070    11.00000   -1.20000
H50B  2    0.089021    0.827271    0.625686    11.00000   -1.20000
AFIX   0
C51   1    0.021763    0.781239    0.779762    11.00000    0.04048    0.05653 =
         0.08219   -0.03317   -0.01119   -0.00920
AFIX  23
H51A  2    0.011802    0.740705    0.761928    11.00000   -1.20000
H51B  2   -0.028960    0.825959    0.773314    11.00000   -1.20000
AFIX   0
C52   1    0.027294    0.737440    0.868132    11.00000    0.04418    0.06961 =
         0.06734   -0.03204   -0.00617   -0.01112
AFIX  23
H52A  2    0.042746    0.777385    0.883648    11.00000   -1.20000
H52B  2   -0.032052    0.721166    0.901766    11.00000   -1.20000
AFIX   0

K2    3    0.240034    0.805561    0.258923    11.00000    0.04147    0.04785 =
         0.06916   -0.02469   -0.01658   -0.00414
O7    5    0.163406    0.836018    0.128369    11.00000    0.05572    0.06023 =
         0.07156   -0.03224   -0.02145   -0.00390
O8    5    0.089768    0.727097    0.289600    11.00000    0.04777    0.06682 =
         0.07537   -0.02856   -0.02169   -0.00781
O9    5    0.278837    0.969414    0.208980    11.00000    0.06205    0.04848 =
         0.07108   -0.02217   -0.02014   -0.00674
O10   5    0.162929    0.891016    0.364084    11.00000    0.06043    0.06327 =
         0.07304   -0.02924   -0.01467   -0.01923
O11   5    0.422391    0.743670    0.199191    11.00000    0.04732    0.06555 =
         0.07699   -0.02462   -0.02465    0.00103
O12   5    0.340087    0.674153    0.371378    11.00000    0.04868    0.05948 =
         0.07699   -0.02019   -0.01449   -0.00381
N3    4    0.339798    0.901807    0.084851    11.00000    0.04781    0.06165 =
         0.07129   -0.02469   -0.01855   -0.00081
N4    4    0.143767    0.707628    0.433601    11.00000    0.05326    0.05848 =
         0.07522   -0.02663   -0.02206   -0.00725
C53   1    0.274910    0.927792    0.031862    11.00000    0.05773    0.07355 =
         0.06472   -0.02084   -0.01267   -0.00496
AFIX  23
H53A  2    0.308301    0.947757   -0.025160    11.00000   -1.20000
H53B  2    0.232996    0.975436    0.038964    11.00000   -1.20000
AFIX   0
C54   1    0.220306    0.858501    0.048276    11.00000    0.06179    0.08297 =
         0.06141   -0.03246   -0.02244   -0.00473
AFIX  23
H54A  2    0.183763    0.878952    0.007768    11.00000   -1.20000
H54B  2    0.260940    0.809008    0.044182    11.00000   -1.20000
AFIX   0
C55   1    0.106753    0.773336    0.145337    11.00000    0.06690    0.06025 =
         0.07649   -0.03004   -0.03149   -0.00470
AFIX  23
H55A  2    0.143795    0.720147    0.147705    11.00000   -1.20000
H55B  2    0.074181    0.793008    0.102029    11.00000   -1.20000
AFIX   0
C56   1    0.041302    0.760063    0.225832    11.00000    0.06356    0.04611 =
         0.09286   -0.03109   -0.03784    0.00242
AFIX  23
H56A  2    0.005667    0.813740    0.223721    11.00000   -1.20000
H56B  2    0.000105    0.720391    0.237144    11.00000   -1.20000
AFIX   0
C57   1    0.029222    0.699972    0.368407    11.00000    0.05640    0.06814 =
         0.07887   -0.03376   -0.00882   -0.01800
AFIX  23
H57A  2   -0.009970    0.662292    0.372104    11.00000   -1.20000
H57B  2   -0.008653    0.748939    0.376433    11.00000   -1.20000
AFIX   0
C58   1    0.083674    0.653599    0.434373    11.00000    0.05635    0.06484 =
         0.08171   -0.02505   -0.01489   -0.02098
AFIX  23
H58A  2    0.042135    0.633529    0.487927    11.00000   -1.20000
H58B  2    0.120223    0.604140    0.426368    11.00000   -1.20000
AFIX   0
C59   1    0.370798    0.978068    0.078017    11.00000    0.06224    0.06498 =
         0.07460   -0.02026   -0.01040   -0.01805
AFIX  23
H59A  2    0.385579    1.016570    0.020345    11.00000   -1.20000
H59B  2    0.425910    0.961052    0.098360    11.00000   -1.20000
AFIX   0
C60   1    0.301385    1.025182    0.125061    11.00000    0.07308    0.05611 =
         0.08528   -0.02182   -0.02536   -0.00552
AFIX  23
H60A  2    0.326043    1.073727    0.119439    11.00000   -1.20000
H60B  2    0.247338    1.046033    0.102851    11.00000   -1.20000
AFIX   0
C61   1    0.231608    1.015069    0.258124    11.00000    0.06571    0.05859 =
         0.08709   -0.03529   -0.01922   -0.01259
AFIX  23
H61A  2    0.172957    1.041193    0.244962    11.00000   -1.20000
H61B  2    0.265967    1.059818    0.247426    11.00000   -1.20000
AFIX   0
C62   1    0.219162    0.954593    0.346253    11.00000    0.06746    0.06994 =
         0.09151   -0.04396   -0.01523   -0.01538
AFIX  23
H62A  2    0.277905    0.926953    0.358436    11.00000   -1.20000
H62B  2    0.190943    0.985609    0.380877    11.00000   -1.20000
AFIX   0
C63   1    0.140511    0.841881    0.449599    11.00000    0.07641    0.06997 =
         0.06288   -0.02874   -0.00940   -0.02154
AFIX  23
H63A  2    0.103465    0.877693    0.477343    11.00000   -1.20000
H63B  2    0.195540    0.818503    0.470241    11.00000   -1.20000
AFIX   0
C64   1    0.088476    0.769409    0.467814    11.00000    0.05976    0.06124 =
         0.07527   -0.03062   -0.00594   -0.01254
AFIX  23
H64A  2    0.068208    0.739690    0.526985    11.00000   -1.20000
H64B  2    0.035009    0.793295    0.444824    11.00000   -1.20000
AFIX   0
C65   1    0.417938    0.845581    0.061806    11.00000    0.04904    0.07423 =
         0.07056   -0.02511   -0.00867   -0.00501
AFIX  23
H65A  2    0.456102    0.879326    0.010205    11.00000   -1.20000
H65B  2    0.396176    0.804089    0.052679    11.00000   -1.20000
AFIX   0
C66   1    0.474127    0.799403    0.124468    11.00000    0.05016    0.07813 =
         0.07200   -0.02247   -0.01608    0.00303
AFIX  23
H66A  2    0.526762    0.766755    0.103610    11.00000   -1.20000
H66B  2    0.495436    0.840220    0.134878    11.00000   -1.20000
AFIX   0
C67   1    0.472186    0.703453    0.261999    11.00000    0.04261    0.07064 =
         0.07959   -0.02404   -0.02396    0.01035
AFIX  23
H67A  2    0.481837    0.745716    0.277824    11.00000   -1.20000
H67B  2    0.531166    0.678220    0.240999    11.00000   -1.20000
AFIX   0
C68   1    0.422622    0.635860    0.335744    11.00000    0.05254    0.05585 =
         0.08072   -0.02179   -0.02422    0.00708
AFIX  23
H68A  2    0.409536    0.595267    0.319651    11.00000   -1.20000
H68B  2    0.460104    0.605498    0.375764    11.00000   -1.20000
AFIX   0
C69   1    0.287932    0.610869    0.439306    11.00000    0.07549    0.05651 =
         0.07056   -0.00497   -0.02711   -0.01218
AFIX  23
H69A  2    0.326172    0.571375    0.476441    11.00000   -1.20000
H69B  2    0.265165    0.578930    0.419330    11.00000   -1.20000
AFIX   0
C70   1    0.210283    0.652504    0.484250    11.00000    0.06059    0.06554 =
         0.07100   -0.01920   -0.01920   -0.00373
AFIX  23
H70A  2    0.179506    0.608794    0.533452    11.00000   -1.20000
H70B  2    0.233578    0.686684    0.501413    11.00000   -1.20000
AFIX   0

O13   5    0.569426    0.492864    0.762906    11.00000    0.09736    0.09448 =
         0.11805   -0.03237   -0.03984    0.00046
C71   1    0.507486    0.459984    0.839812    11.00000    0.09332    0.09760 =
         0.12236   -0.04063   -0.03796   -0.00951
AFIX  23
H71A  2    0.484736    0.410441    0.845428    11.00000   -1.20000
H71B  2    0.456348    0.502685    0.843912    11.00000   -1.20000
AFIX   0
C72   1    0.555715    0.436453    0.904386    11.00000    0.10537    0.11898 =
         0.12748   -0.04117   -0.04008   -0.02102
AFIX  23
H72A  2    0.531825    0.388568    0.953515    11.00000   -1.20000
H72B  2    0.551431    0.484026    0.918581    11.00000   -1.20000
AFIX   0
C73   1    0.650655    0.413089    0.866505    11.00000    0.09454    0.10959 =
         0.14021   -0.03673   -0.05850   -0.00757
AFIX  23
H73A  2    0.660981    0.353782    0.874464    11.00000   -1.20000
H73B  2    0.693523    0.423331    0.888892    11.00000   -1.20000
AFIX   0
C74   1    0.657589    0.470930    0.778374    11.00000    0.09684    0.10185 =
         0.13183   -0.04859   -0.04491   -0.01663
AFIX  23
H74A  2    0.682958    0.521873    0.765826    11.00000   -1.20000
H74B  2    0.697093    0.442754    0.743943    11.00000   -1.20000
AFIX   0

O14   5    0.096386    0.917659    0.892187    11.00000    0.11265    0.09020 =
         0.12429   -0.03954   -0.05410    0.00480
C75   1    0.008764    0.964612    0.898228    11.00000    0.11517    0.08346 =
         0.14623   -0.04539   -0.02520   -0.00937
AFIX  23
H75A  2    0.008683    1.012447    0.910685    11.00000   -1.20000
H75B  2   -0.036099    0.928645    0.940677    11.00000   -1.20000
AFIX   0
C76   1   -0.009921    0.994307    0.816054    11.00000    0.10235    0.07870 =
         0.15833   -0.06276   -0.06174    0.00451
AFIX  23
H76A  2   -0.053799    1.044886    0.804675    11.00000   -1.20000
H76B  2   -0.032264    0.950242    0.811220    11.00000   -1.20000
AFIX   0
C77   1    0.080956    1.013460    0.760041    11.00000    0.12811    0.08604 =
         0.12894   -0.06176   -0.03269    0.02439
AFIX  23
H77A  2    0.088053    1.003488    0.711289    11.00000   -1.20000
H77B  2    0.089944    1.072088    0.743326    11.00000   -1.20000
AFIX   0
C78   1    0.144708    0.953774    0.810485    11.00000    0.10043    0.08409 =
         0.13000   -0.05819   -0.04228   -0.00026
AFIX  23
H78A  2    0.173207    0.909462    0.790715    11.00000   -1.20000
H78B  2    0.191892    0.983753    0.806813    11.00000   -1.20000
AFIX   0

C1    1    0.562440    0.916757    0.742316    11.00000    0.04316    0.04469 =
         0.07301   -0.02635   -0.01398   -0.00296
C2    1    0.625663    0.904206    0.676127    11.00000    0.03408    0.04574 =
         0.06137   -0.02009   -0.00845   -0.00194
AFIX  43
H2    2    0.626230    0.938821    0.620982    11.00000   -1.20000
AFIX   0
C3    1    0.688986    0.831402    0.704447    11.00000    0.03417    0.04116 =
         0.07542   -0.02865   -0.01590   -0.00090
C4    1    0.664124    0.797888    0.791387    11.00000    0.03894    0.04087 =
         0.07329   -0.02548   -0.02057   -0.00308
C5    1    0.586329    0.850955    0.813430    11.00000    0.04020    0.04499 =
         0.07128   -0.02744   -0.01442   -0.00169
AFIX  43
H5    2    0.555853    0.843118    0.867101    11.00000   -1.20000
AFIX   0
C6    1    0.483511    0.987457    0.736722    11.00000    0.04489    0.05230 =
         0.07551   -0.03126   -0.01332    0.00568
C7    1    0.518302    1.074804    0.698992    11.00000    0.05420    0.05013 =
         0.10354   -0.02971   -0.02132    0.00643
AFIX 137
H7A   2    0.555712    1.084849    0.644864    11.00000   -1.50000
H7B   2    0.553341    1.075719    0.733099    11.00000   -1.50000
H7C   2    0.467612    1.118475    0.695415    11.00000   -1.50000
AFIX   0
C8    1    0.422572    0.974178    0.820230    11.00000    0.05673    0.06060 =
         0.08996   -0.02898   -0.00647    0.00319
AFIX 137
H8A   2    0.457680    0.969965    0.856638    11.00000   -1.50000
H8B   2    0.395238    0.922577    0.841982    11.00000   -1.50000
H8C   2    0.375904    1.021518    0.815364    11.00000   -1.50000
AFIX   0
C9    1    0.426674    0.989014    0.681059    11.00000    0.06227    0.07843 =
         0.11086   -0.04460   -0.03653    0.01513
AFIX 137
H9A   2    0.404974    0.934596    0.702882    11.00000   -1.50000
H9B   2    0.463668    1.000946    0.626491    11.00000   -1.50000
H9C   2    0.375935    1.032472    0.679093    11.00000   -1.50000
AFIX   0
C10   1    0.764629    0.805176    0.640875    11.00000    0.03858    0.04895 =
         0.08046   -0.03289   -0.01363    0.00140
C11   1    0.859247    0.823150    0.637414    11.00000    0.03733    0.07360 =
         0.10160   -0.04444   -0.00771   -0.00449
AFIX 137
H11A  2    0.871116    0.795422    0.691625    11.00000   -1.50000
H11B  2    0.860025    0.883477    0.617349    11.00000   -1.50000
H11C  2    0.905119    0.801666    0.601127    11.00000   -1.50000
AFIX   0
C12   1    0.749020    0.854772    0.553516    11.00000    0.05980    0.06105 =
         0.08043   -0.03404   -0.00692   -0.00135
AFIX 137
H12A  2    0.750798    0.914405    0.536837    11.00000   -1.50000
H12B  2    0.690772    0.846079    0.552456    11.00000   -1.50000
H12C  2    0.795691    0.834964    0.516418    11.00000   -1.50000
AFIX   0
C13   1    0.769457    0.710587    0.658647    11.00000    0.04969    0.04995 =
         0.09163   -0.03414   -0.01380    0.00069
AFIX 137
H13A  2    0.712130    0.699397    0.658143    11.00000   -1.50000
H13B  2    0.782983    0.675760    0.711734    11.00000   -1.50000
H13C  2    0.816273    0.697565    0.617158    11.00000   -1.50000
AFIX   0
C14   1    0.700258    0.717884    0.860059    11.00000    0.04333    0.04840 =
         0.08088   -0.02454   -0.02423   -0.00235
C15   1    0.804232    0.703173    0.847091    11.00000    0.05003    0.06390 =
         0.09594   -0.02557   -0.03368   -0.00002
AFIX 137
H15A  2    0.825977    0.753369    0.839750    11.00000   -1.50000
H15B  2    0.830656    0.691171    0.799051    11.00000   -1.50000
H15C  2    0.821005    0.655790    0.894372    11.00000   -1.50000
AFIX   0
C16   1    0.667847    0.635724    0.871498    11.00000    0.05352    0.04723 =
         0.09575   -0.02417   -0.02338    0.00083
AFIX 137
H16A  2    0.687966    0.628660    0.820579    11.00000   -1.50000
H16B  2    0.602724    0.640211    0.887504    11.00000   -1.50000
H16C  2    0.692777    0.587415    0.913494    11.00000   -1.50000
AFIX   0
C17   1    0.663595    0.722645    0.945007    11.00000    0.07403    0.05595 =
         0.08695   -0.02075   -0.03671   -0.00153
AFIX 137
H17A  2    0.598509    0.726074    0.959081    11.00000   -1.50000
H17B  2    0.681576    0.772273    0.942762    11.00000   -1.50000
H17C  2    0.687927    0.672546    0.985941    11.00000   -1.50000
AFIX   0

C18   1    0.053324    0.423572    0.736958    11.00000    0.03488    0.03756 =
         0.06580   -0.02006   -0.01370   -0.00056
C19   1    0.075675    0.358252    0.808964    11.00000    0.03854    0.04335 =
         0.06398   -0.02656   -0.01096   -0.00428
AFIX  43
H19   2    0.044712    0.351068    0.862372    11.00000   -1.20000
AFIX   0
C20   1    0.153894    0.304155    0.787328    11.00000    0.03689    0.03645 =
         0.07015   -0.02235   -0.02009    0.00091
C21   1    0.178817    0.337481    0.699621    11.00000    0.03047    0.04070 =
         0.07586   -0.02749   -0.01553    0.00644
C22   1    0.116419    0.410716    0.670276    11.00000    0.04087    0.04421 =
         0.06398   -0.02699   -0.01193   -0.00072
AFIX  43
H22   2    0.117204    0.445103    0.615050    11.00000   -1.20000
AFIX   0
C23   1   -0.025698    0.494507    0.729965    11.00000    0.04249    0.04058 =
         0.06751   -0.01901   -0.01482   -0.00103
C24   1   -0.082402    0.494914    0.675070    11.00000    0.04102    0.05150 =
         0.08723   -0.02778   -0.02274    0.00719
AFIX 137
H24A  2   -0.101653    0.439555    0.696140    11.00000   -1.50000
H24B  2   -0.046305    0.508893    0.619941    11.00000   -1.50000
H24C  2   -0.134728    0.536546    0.674782    11.00000   -1.50000
AFIX   0
C25   1   -0.087785    0.482806    0.814398    11.00000    0.04653    0.04872 =
         0.07764   -0.02137   -0.00916    0.00684
AFIX 137
H25A  2   -0.054222    0.485826    0.848529    11.00000   -1.50000
H25B  2   -0.110076    0.428243    0.839777    11.00000   -1.50000
H25C  2   -0.138049    0.527000    0.807916    11.00000   -1.50000
AFIX   0
C26   1    0.010087    0.582006    0.690698    11.00000    0.04829    0.04193 =
         0.06855   -0.02169   -0.01150   -0.00172
AFIX 137
H26A  2    0.045174    0.592175    0.635790    11.00000   -1.50000
H26B  2    0.047619    0.582491    0.723047    11.00000   -1.50000
H26C  2   -0.040251    0.625835    0.688806    11.00000   -1.50000
AFIX   0
C27   1    0.190693    0.224840    0.856789    11.00000    0.03615    0.04936 =
         0.07429   -0.02533   -0.02087    0.00388
C28   1    0.159275    0.142774    0.868834    11.00000    0.06884    0.04792 =
         0.09048   -0.01790   -0.03196   -0.00206
AFIX 137
H28A  2    0.185558    0.131656    0.820289    11.00000   -1.50000
H28B  2    0.094247    0.149475    0.878463    11.00000   -1.50000
H28C  2    0.178391    0.095916    0.915276    11.00000   -1.50000
AFIX   0
C29   1    0.153139    0.232134    0.939852    11.00000    0.06537    0.06637 =
         0.07557   -0.02025   -0.02533   -0.00001
AFIX 137
H29A  2    0.088684    0.229986    0.955935    11.00000   -1.50000
H29B  2    0.165708    0.285217    0.934878    11.00000   -1.50000
H29C  2    0.181507    0.185766    0.980760    11.00000   -1.50000
AFIX   0
C30   1    0.294334    0.213028    0.843442    11.00000    0.04370    0.06983 =
         0.09363   -0.01994   -0.02991    0.00141
AFIX 137
H30A  2    0.313819    0.262549    0.840004    11.00000   -1.50000
H30B  2    0.321662    0.205381    0.793185    11.00000   -1.50000
H30C  2    0.312450    0.163756    0.888777    11.00000   -1.50000
AFIX   0
C31   1    0.253387    0.308738    0.637439    11.00000    0.03609    0.05358 =
         0.07248   -0.03402   -0.01489    0.00198
C32   1    0.262065    0.213478    0.658840    11.00000    0.07062    0.06382 =
         0.09947   -0.04937   -0.01678    0.00342
AFIX 137
H32A  2    0.204602    0.198391    0.663323    11.00000   -1.50000
H32B  2    0.280125    0.181683    0.710344    11.00000   -1.50000
H32C  2    0.306923    0.200478    0.616307    11.00000   -1.50000
AFIX   0
C33   1    0.233229    0.354077    0.551210    11.00000    0.05609    0.06873 =
         0.07944   -0.03631   -0.01211    0.00133
AFIX 137
H33A  2    0.230451    0.414583    0.533060    11.00000   -1.50000
H33B  2    0.176088    0.340392    0.553118    11.00000   -1.50000
H33C  2    0.280541    0.335614    0.513515    11.00000   -1.50000
AFIX   0
C34   1    0.347344    0.332336    0.628431    11.00000    0.04256    0.09871 =
         0.10430   -0.05917   -0.00710   -0.00780
AFIX 137
H34A  2    0.361226    0.308915    0.681669    11.00000   -1.50000
H34B  2    0.345810    0.393232    0.604857    11.00000   -1.50000
H34C  2    0.393127    0.309462    0.593193    11.00000   -1.50000
AFIX   0
HKLF 4


REM  rdpm103_a.res in P-1
REM wR2 = 0.2460, GooF = S = 0.958, Restrained GooF = 0.960 for all data
REM R1 = 0.0798 for 6804 Fo > 4sig(Fo) and 0.1755 for all 15269 data
REM 901 parameters refined using 120 restraints

END

WGHT      0.1047      0.0000

REM Highest difference peak  0.634,  deepest hole -0.606,  1-sigma level  0.058
Q1    1   0.2240  0.7724  0.3307  11.00000  0.05    0.63
Q2    1   0.2500  0.6623  0.8166  11.00000  0.05    0.58
Q3    1   0.2795  0.7296  0.6792  11.00000  0.05    0.56
Q4    1   0.2546  0.8341  0.1867  11.00000  0.05    0.54
Q5    1   0.0239  0.9890  0.7672  11.00000  0.05    0.30
Q6    1   0.0946  0.7531  0.2219  11.00000  0.05    0.30
Q7    1   0.2215  0.8101  0.1200  11.00000  0.05    0.28
Q8    1   0.1451  0.2736  0.8517  11.00000  0.05    0.27
Q9    1   0.4933  1.0319  0.7956  11.00000  0.05    0.26
Q10   1  -0.0261  0.9733  0.8603  11.00000  0.05    0.25
Q11   1   0.5990  0.8826  0.7396  11.00000  0.05    0.25
Q12   1   0.4182  0.7713  0.7072  11.00000  0.05    0.24
Q13   1   0.2765  0.8676  0.5091  11.00000  0.05    0.24
Q14   1   0.1744  0.9076  0.3039  11.00000  0.05    0.23
Q15   1   0.1460  0.9247  0.2924  11.00000  0.05    0.23
Q16   1   0.4951  1.0380  0.6595  11.00000  0.05    0.23
Q17   1   0.1514  0.9300  0.5082  11.00000  0.05    0.22
Q18   1   0.3969  0.9519  0.7635  11.00000  0.05    0.22
Q19   1   0.0571  0.3913  0.7781  11.00000  0.05    0.22
Q20   1   0.6338  0.9391  0.5982  11.00000  0.05    0.21
;
_shelx_res_checksum                6140
_shelx_hkl_file
;
   0   0  -1 5655.98 578.560   2
   0   0  -1 5656.66 578.623   3
   0   0  -2 357787. 36735.3   3
   0   0  -2 364134. 36735.7   2
   0   0  -3 5008.43 561.155   3
   0   0  -3 5289.76 555.780   2
   0   0  -4 35249.6 3606.57   2
   0   0  -4 35370.8 3606.47   3
   0   0  -5 8359.14 890.901   3
   0   0  -5 8600.21 891.428   2
   0   0  -6 16600.1 1753.68   2
   0   0  -6 17362.4 1753.97   3
   0   0  -7 2404.83 388.263   3
   0   0  -7 2104.38 386.125   2
   0   0  -8 19107.3 1695.24   3
   0   0  -8 13474.4 1691.21   2
   0   0  -9 3179.45 473.218   2
   0   0  -9 3300.57 465.270   3
   0   0 -10 6411.90 749.937   2
   0   0 -11 281.135 331.510   2
   0   0 -12 3031.64 598.741  30
   0   0 -12 3740.48 530.512   2
   0   0 -13 713.428 514.345  30
   0   0 -13 701.746 431.364   2
   0   0 -14 1046.44 439.095   2
   0   0 -14 1394.06 476.272   1
   0   0 -15 175.602 493.253  30
   0   0 -16 1141.59 488.844  30
   0   0  16 1314.16 313.382  11
   0   0 -17 1034.09 425.279  30
   0   0 -18 494.708 352.066  30
   0   0 -19-239.527 272.928  30
   0   0  19-38.3590 213.425  34
   0   0 -20-326.021 184.805  30
   0   1 -19 517.087 255.209  30
   0   1 -18 223.682 323.390  30
   0   1 -17-65.3061 386.250  30
   0   1 -16 825.881 451.548  30
   0   1 -15 851.612 509.678  30
   0  -1  15 725.779 287.385  11
   0   1 -14 1184.20 535.739  30
   0   1 -13 806.882 531.635  30
   0  -1  13 889.799 314.564  11
   0   1 -12 223.204 490.916  30
   0   1 -11 2641.35 488.787  24
   0   1  -9 699.235 325.541   3
   0   1  -8 667.083 365.837   3
   0   1  -7 18146.6 1890.90   3
   0   1  -6-59.7641 264.090   3
   0   1  -5 85.0926 206.763   3
   0   1  -4 872.439 224.819   3
   0   1  -3 807.088 227.435   3
   0   1  -2 7238.17 758.854   3
   0   1  -1 9396.01 963.195   3
   0   1   0-5.55384 41.9331   3
   0   1   0 46.9210 38.8869   5
   0  -1  -1 403.266 51.0708   2
   0   1   2 1189.64 154.032   4
   0  -1  -2 1278.75 148.127   2
   0  -1  -3 311.291 139.359   3
   0  -1  -3 229.279 146.641   2
   0  -1  -4 857.764 199.035   3
   0  -1  -4 893.556 203.303   2
   0  -1  -5 218.583 178.373   2
   0  -1  -5 309.054 166.544   3
   0  -1  -6 5864.11 644.388   3
   0  -1  -6 6180.93 652.497   2
   0  -1  -7 5537.01 656.409   2
   0  -1  -7 6004.64 653.857   3
   0  -1  -8 976.434 359.171   2
   0  -1  -9-265.979 333.794   2
   0  -1 -10 4579.91 582.466   2
   0  -1 -11-41.3533 326.390   2
   0  -1 -12 379.439 457.260  30
   0  -1 -12 797.060 363.864   2
   0  -1 -13 2528.44 605.199  30
   0  -1 -13 4020.76 552.846   2
   0  -1 -14 262.739 507.992  30
   0  -1 -14-782.332 434.639   2
   0   1  14 372.298 325.102  11
   0  -1 -15 216.372 504.584  30
   0  -1 -15 1372.85 460.268   1
   0  -1 -15 979.408 446.214   2
   0   1  16-90.0652 297.493  11
   0  -1 -16 147.732 467.075  30
   0  -1 -17 555.383 437.830  30
   0  -1 -18 175.272 376.519  30
   0  -1 -19 99.3714 302.917  30
   0   2 -19 3.15982 201.258  30
   0   2 -18-180.646 293.098  30
   0   2 -17-304.132 364.832  30
   0   2 -16-274.177 431.080  30
   0   2 -15 831.502 491.720  30
   0   2 -14 674.980 511.041  30
   0   2 -14 364.922 251.746   6
   0   2 -13 39.1387 526.593  30
   0   2 -13 274.628 263.499   6
   0   2 -13 103.751 421.348   2
   0   2 -12 4637.42 617.199   2
   0   2 -12 4734.17 508.551   6
   0  -2  12 3331.81 521.394  11
   0   2 -12 3905.85 679.818  30
   0   2 -11-155.071 436.377  24
   0   2 -11 597.616 376.648   2
   0   2 -11-40.4325 246.119   6
   0   2 -10 4777.79 584.822   3
   0   2 -10 4334.12 596.348   2
   0   2  -9 75.6138 323.040   3
   0   2  -9 37.2859 314.316   2
   0   2  -8 22071.2 2573.87   2
   0   2  -8 28082.4 2578.48   3
   0   2  -7 2294.49 428.417   3
   0   2  -7 1590.81 401.968   2
   0   2  -6 6623.89 719.716   3
   0   2  -6 5684.16 712.376   2
   0   2  -5 1305.60 291.741   3
   0   2  -5 1383.66 273.328   2
   0   2  -4 36577.4 3621.00   3
   0   2  -4 34474.2 3617.62   2
   0   2  -3 314.339 179.766   2
   0   2  -3 588.653 210.739   3
   0   2  -2 217450. 22487.6   3
   0   2  -2 223474. 22486.3   2
   0   2  -1 27927.4 2900.44   3
   0   2  -1 28718.5 2897.60   2
   0   2   0 163262. 16624.6   2
   0   2   1 1810.22 194.547   4
   0   2   2 73655.3 7539.07   3
   0  -2  -2 74817.5 7540.29   2
   0  -2  -3 3797.83 415.121   2
   0  -2  -4 104521. 10648.8   2
   0  -2  -5 387.784 179.064   2
   0  -2  -6 5086.04 559.243   2
   0  -2  -7 7515.71 816.178   2
   0  -2  -8 8797.92 967.697   2
   0  -2  -9 12717.6 1352.97   2
   0  -2 -10 31489.2 3242.15   2
   0  -2 -11 142.896 325.627   2
   0  -2 -12 150.597 345.266   2
   0  -2 -13 322.095 457.060  30
   0  -2 -13-199.605 396.328   2
   0  -2 -14 488.967 511.075  30
   0   2  14 1181.66 360.591  11
   0  -2 -14 1493.39 435.170   2
   0  -2 -15 156.296 498.802  30
   0  -2 -15 1369.59 444.256   2
   0  -2 -16-795.474 472.560  30
   0  -2 -17 153.539 421.845  30
   0   2  17 220.699 215.878  14
   0   2  17 283.462 289.555  11
   0  -2 -18 454.003 374.670  30
   0  -2 -19 175.947 312.987  30
   0   2  21-29.7871 89.0420   7
   0   3 -19-93.4333 139.994  30
   0   3 -18 224.886 252.304  30
   0   3 -17 623.164 337.477  30
   0   3 -16 265.004 393.329  30
   0   3 -15 993.782 523.928  30
   0   3 -15 2917.01 343.973   6
   0   3 -14-151.657 508.190  30
   0   3 -14 1196.09 266.579   6
   0   3 -13 346.629 424.843   2
   0   3 -13 607.877 523.937  30
   0   3 -13-387.157 443.014   1
   0   3 -13 575.444 261.339   6
   0   3 -12 212.944 277.888   6
   0   3 -12 73.0167 427.486   1
   0   3 -12 519.781 410.209   2
   0   3 -12 234.097 478.396  24
   0   3 -11 984.627 407.089   2
   0   3 -11 1732.80 440.806   1
   0   3 -11 621.605 276.317   6
   0   3 -11 553.813 460.769  24
   0   3 -10 617.373 359.248   2
   0   3 -10 136.761 438.077  24
   0   3 -10 746.822 373.931   1
   0   3 -10 393.340 353.509   3
   0   3 -10 129.634 238.120   6
   0   3  -9 857.939 360.272   1
   0   3  -9 807.489 346.300   3
   0   3  -9 1336.27 357.548   2
   0   3  -8 3916.87 514.178   3
   0   3  -8 3360.04 502.820   2
   0   3  -8 3723.05 518.720   1
   0   3  -7 128.023 350.835   3
   0   3  -7 556.843 352.746   1
   0   3  -7 3.74101 329.084   2
   0   3  -6 7833.63 894.301   2
   0   3  -6 8127.72 902.106   3
   0   3  -5 710.804 315.779   3
   0   3  -5 8.00592 294.150   2
   0   3  -4 4742.48 586.157   1
   0   3  -4 5384.64 591.155   3
   0   3  -4 5465.61 582.186   2
   0   3  -3-67.5054 212.041   3
   0   3  -3 20.9217 179.507   2
   0   3  -3-61.2146 203.166   1
   0   3  -2 65.5720 196.479   3
   0   3  -2 5.03491 203.611   1
   0   3  -2 8.00182 168.373   2
   0   3  -1 1045.05 219.099   1
   0   3  -1 1188.04 202.304   2
   0   3   0 7670.80 813.650   1
   0   3   0 7860.43 805.291   2
   0   3   1 1624.42 220.497   1
   0   3   1 1595.18 205.513   4
   0   3   1 2015.03 233.632   3
   0   3   2 8569.64 906.451   3
   0  -3  -2 8950.42 901.419   2
   0   3   2 8652.27 911.582   5
   0   3   2 8843.51 907.397   4
   0  -3  -3 8186.58 803.810   2
   0   3   3 8147.62 809.224   5
   0   3   3 7309.27 796.680   3
   0   3   3 8245.31 811.634   4
   0  -3  -4 41.3069 155.596   2
   0   3   4 214.729 177.941   4
   0  -3  -5 5053.19 544.015   2
   0  -3  -6 5293.28 582.078   2
   0  -3  -7 4830.24 555.165   2
   0  -3  -8 998.189 340.259   2
   0  -3  -9 5592.80 674.435   2
   0  -3 -10 714.184 333.184   2
   0  -3 -11 1306.11 351.914   2
   0  -3 -12-295.257 348.143   2
   0  -3 -13 102.530 384.845   2
   0  -3 -13-265.415 435.023  30
   0  -3 -14 493.019 401.471   2
   0  -3 -14 1034.72 478.582  30
   0   3  14 305.255 328.816  11
   0  -3 -15 533.028 439.546   2
   0  -3 -15 1112.86 491.557  30
   0  -3 -16 463.698 464.213  30
   0   3  17 271.538 294.320  11
   0   3  17 705.080 232.358  14
   0  -3 -17 223.785 429.910  30
   0  -3 -18 603.178 384.016  30
   0  -3 -19 66.9434 316.681  30
   0  -3 -20 202.731 244.799  30
   0   3  20 301.742 259.232  34
   0   4 -18-352.320 198.480  30
   0   4 -15 429.748 215.738   6
   0   4 -14 361.672 243.405   6
   0   4 -13 4762.91 565.920   6
   0   4 -12-272.193 276.547   6
   0   4 -12 358.028 495.346  24
   0   4 -12-261.273 408.607   2
   0   4 -12-578.599 454.457   1
   0   4 -11 8819.93 942.118   6
   0   4 -11 7506.35 1023.72  24
   0   4 -11 9132.68 1013.65   1
   0   4 -11 8998.12 999.311   2
   0   4 -10 326.045 475.143  24
   0   4 -10 394.560 377.142   2
   0   4 -10 340.459 265.434   6
   0   4 -10 1139.42 391.949   3
   0   4 -10 542.490 405.684   1
   0   4  -9 7779.93 861.677   3
   0   4  -9 7825.50 859.055   1
   0   4  -9 7556.35 848.274   2
   0   4  -9 6386.43 873.041  24
   0   4  -8 6075.68 725.897   1
   0   4  -8 5861.69 714.957   2
   0   4  -8 6428.70 723.352   3
   0   4  -7 25479.9 2673.00   2
   0   4  -7 25355.1 2678.92   1
   0   4  -7 26962.9 2679.44   3
   0   4  -6 21993.2 2280.37   1
   0   4  -6 21303.8 2276.46   2
   0   4  -6 22707.5 2281.36   3
   0   4  -5 8851.88 969.994   2
   0   4  -5 9397.92 987.249   3
   0   4  -5 8334.55 979.341   1
   0   4  -4 22031.6 2257.59   3
   0   4  -4 21855.8 2255.56   1
   0   4  -4 21625.7 2248.21   2
   0   4  -3 11413.4 1168.39   3
   0   4  -3 11143.6 1157.18   2
   0   4  -3 10747.7 1165.03   1
   0   4  -2 810.420 216.554   1
   0   4  -2 876.179 198.325   2
   0   4  -2 968.839 230.855   3
   0   4  -1 112702. 11443.8   2
   0   4  -1 111803. 11446.5   1
   0   4   0 55491.6 5613.07   2
   0   4   0 54359.2 5616.48   1
   0   4   1 11317.5 1193.95   5
   0   4   1 11660.8 1187.73   1
   0   4   1 11179.5 1183.13   4
   0   4   1 12332.3 1194.01   3
   0   4   2 976476. 100409.   3
   0   4   2 999999. 100409.   4
   0   4   2 978412. 100410.   5
   0  -4  -3 43148.8 4433.82   2
   0   4   3 43434.8 4435.12   3
   0   4   3 44764.0 4437.91   4
   0   4   3 43152.4 4438.52   5
   0   4   4 29090.2 2863.90   5
   0   4   4 29142.3 2866.02   4
   0   4   4 27136.1 2856.44   3
   0  -4  -4 28858.9 2860.95   2
   0  -4  -5 105.811 155.291   2
   0   4   5-10.3149 182.694   4
   0   4   5 245.289 173.794   5
   0  -4  -6 17311.4 1779.65   2
   0  -4  -7 5773.09 643.603   2
   0  -4  -8 1285.79 341.306   2
   0  -4  -9 29160.6 3001.18   2
   0  -4 -10 6219.09 723.214   2
   0  -4 -11 8412.91 932.299   2
   0  -4 -12 1643.90 379.309   2
   0  -4 -13 6550.40 827.936  30
   0  -4 -13 7069.21 812.140   2
   0  -4 -14 5903.98 770.050  30
   0   4  14 6055.92 702.912  11
   0  -4 -14 5717.79 751.871   2
   0  -4 -15 5523.85 676.223   2
   0  -4 -15 4203.84 691.726  30
   0  -4 -16 1843.86 517.393  30
   0  -4 -16 2993.01 505.516   2
   0   4  17 174.897 249.670  14
   0  -4 -17 343.838 417.877  30
   0   4  17-355.996 315.674  11
   0  -4 -18 464.971 380.919  30
   0   4  19 447.800 186.128  14
   0  -4 -19 328.787 319.567  30
   0   4  20 44.6587 273.919  34
   0   5 -15 120.748 191.815   6
   0   5 -14-370.158 232.273   6
   0   5 -14-416.661 435.373  30
   0   5 -13 544.106 267.318   6
   0   5 -13-91.6171 480.694  30
   0   5 -12-398.487 490.204  24
   0   5 -12-297.430 514.406  30
   0   5 -12-109.589 277.021   6
   0   5 -11 354.082 531.860  30
   0   5 -11 185.130 429.628   1
   0   5 -11 198.017 392.706   2
   0   5 -11 234.055 293.899   6
   0   5 -11 109.982 509.086  24
   0   5 -10 119.030 278.091   6
   0   5 -10-536.930 424.343   3
   0   5 -10-374.419 336.903  10
   0   5 -10 12.1637 476.276  24
   0   5 -10-152.468 413.256   1
   0   5 -10 331.114 387.679   2
   0   5  -9 601.654 395.164   3
   0   5  -9 460.754 320.466  10
   0   5  -9 386.418 391.161   1
   0   5  -9 468.288 363.694   2
   0   5  -9 224.357 261.674   6
   0   5  -9-233.047 458.547  24
   0   5  -8 1103.25 359.522   3
   0   5  -8 407.845 358.085   1
   0   5  -8 867.528 343.586   2
   0   5  -7 1093.27 372.506   3
   0   5  -7 1770.19 342.207   2
   0   5  -7 1282.58 361.674   1
   0   5  -6 87.7678 325.821   1
   0   5  -6-100.241 349.971   3
   0   5  -6-348.426 307.034   2
   0   5  -5 2313.92 456.513   3
   0   5  -5 2559.29 430.147   2
   0   5  -5 3112.08 446.732   1
   0   5  -4 1499.75 393.437   3
   0   5  -4 1201.73 349.950   2
   0   5  -4 660.564 357.548   1
   0   5  -3 246.723 334.524   3
   0   5  -3 661.827 303.212   1
   0   5  -3 410.321 292.531   2
   0   5  -2 99.8643 242.879   1
   0   5  -2-264.526 218.829   2
   0   5  -1 94.1938 171.210   2
   0   5  -1 294.781 201.869   1
   0   5   0 1691.26 264.961   5
   0   5   0 1666.96 272.692   3
   0   5   0 1923.20 244.896   1
   0   5   0 1599.79 212.224   2
   0   5   1 2926.57 345.045   3
   0   5   1 2668.36 310.766   4
   0   5   1 2558.01 342.609   5
   0   5   1 2934.08 324.227   1
   0   5   2 778.587 206.500   3
   0   5   2 826.139 148.561   4
   0   5   2 963.907 186.604   5
   0   5   3 20425.3 2044.30   3
   0   5   3 20193.6 2047.02   5
   0  -5  -3 19603.4 2036.31   2
   0   5   3 20991.7 2044.46   4
   0   5   4-16.0254 160.834   5
   0   5   4 35.5145 119.441   3
   0  -5  -4 51.0802 113.750   2
   0   5   4 181.337 152.365   4
   0  -5  -5-154.083 152.852   2
   0   5   5-124.061 162.691   5
   0   5   5-98.9812 184.554   4
   0  -5  -6 9756.43 949.451   2
   0   5   6 8745.81 962.169   4
   0   5   6 8508.80 953.650   5
   0   5   7 6486.95 697.585   5
   0  -5  -7 6046.89 700.662   2
   0  -5  -8 242.109 315.885   2
   0  -5  -9 637.839 338.943   2
   0  -5 -10-219.912 321.731   2
   0  -5 -11 165.291 316.184   2
   0  -5 -12-114.407 325.315   2
   0  -5 -13 325.495 359.075   2
   0   5  13 146.795 229.141  12
   0  -5 -14 67.8117 392.971   2
   0   5  14 25.1784 234.582  12
   0  -5 -15 8298.33 971.172   2
   0  -5 -16-53.8981 414.917   2
   0   5  16 420.555 289.359  14
   0  -5 -16 148.097 429.967  30
   0   5  17 1296.26 339.078  11
   0   5  17 873.444 279.201  14
   0   5  19-98.5483 197.400  14
   0   5  20 179.656 148.986  14
   0   5  20-159.510 297.069  29
   0   5  20-97.9960 300.452  34
   0   5  21 166.710 128.697   7
   0   5  22 156.233 78.1552   7
   0   6 -16-260.922 262.259  30
   0   6 -15 233.486 333.231  30
   0   6 -14 1.96239 213.038   6
   0   6 -14-216.886 396.579  30
   0   6 -13 1595.48 498.514  30
   0   6 -13 2308.53 337.711   6
   0   6 -12 103.916 483.626  24
   0   6 -12 1020.82 477.035  30
   0   6 -12 156.311 282.318   6
   0   6 -11 3537.08 711.781  30
   0   6 -11 4272.83 706.834  24
   0   6 -11 5538.31 581.186   6
   0   6 -11 4943.07 684.173   1
   0   6 -11 3624.75 642.873   2
   0   6 -11 5521.51 602.793  10
   0   6 -10 934.435 522.833  24
   0   6 -10 1896.25 425.768   2
   0   6 -10 2448.46 556.156  30
   0   6 -10 1487.58 338.185   6
   0   6 -10 1735.03 477.514   1
   0   6 -10 1306.98 393.634  10
   0   6  -9 129.049 437.794   3
   0   6  -9 932.432 420.794   1
   0   6  -9 874.723 382.548   2
   0   6  -9 849.101 355.899  10
   0   6  -9 665.390 289.871   6
   0   6  -9 524.876 501.511  24
   0   6  -8 867.081 344.517  10
   0   6  -8 1409.07 473.552  24
   0   6  -8 1692.19 426.742   3
   0   6  -8 1538.62 363.654   2
   0   6  -8 940.263 395.434   1
   0   6  -8 357.331 284.044   6
   0   6  -7 418.138 363.878   3
   0   6  -7 50.4364 307.486   2
   0   6  -7 227.399 340.382   1
   0   6  -6 227.084 335.762   3
   0   6  -6 83.6491 322.798   1
   0   6  -6-244.132 284.491   2
   0   6  -5 182.347 343.879   3
   0   6  -5 300.466 287.890   2
   0   6  -5 169.126 327.861   1
   0   6  -4 1322.31 384.237   3
   0   6  -4 1094.14 362.792   1
   0   6  -4 1262.86 325.530   2
   0   6  -3 114.578 339.786   1
   0   6  -3 162.024 290.027   2
   0   6  -3 646.827 362.229   3
   0   6  -2 3370.71 488.445   1
   0   6  -2 3429.90 441.837   2
   0   6  -1 16163.8 1576.08   1
   0   6  -1 14528.4 1564.27   2
   0   6   0 26759.8 2816.43   5
   0   6   0 30309.1 2811.35   1
   0   6   0 25223.1 2801.63   2
   0   6   0 28080.9 2804.75   4
   0   6   0 30069.7 2819.32   3
   0   6   1 787.167 153.244   4
   0   6   1 436.763 198.057   1
   0   6   1 714.148 230.575   5
   0   6   1 371.062 246.404   3
   0   6   2 2424.79 290.908   4
   0   6   2 2441.98 329.626   3
   0   6   2 2497.44 331.315   5
   0   6   2 2698.17 315.281   1
   0   6   3 3684.43 445.237   3
   0   6   3 3977.65 442.545   5
   0   6   3 3879.63 422.264   4
   0   6   4 7018.93 635.997   5
   0   6   4 6326.38 630.521   4
   0  -6  -4 5344.34 605.175   2
   0   6   4 6565.53 624.820   3
   0   6   5 12951.1 1220.02   5
   0   6   5 11288.8 1219.79   4
   0  -6  -5 11306.0 1205.75   2
   0   6   6 20769.5 1886.01   5
   0   6   6 17460.8 1888.14   4
   0  -6  -6 17170.0 1876.20   2
   0   6   7 3872.01 466.872   5
   0  -6  -7 3309.07 454.048   2
   0  -6  -8 2229.73 383.598   2
   0   6   8 2337.78 387.107   5
   0  -6  -9 959.107 340.819   2
   0   6   9 1625.90 323.886   5
   0  -6 -10 39.2034 297.909   2
   0   6  10 62.0071 279.058   5
   0  -6 -11 1928.03 375.958   2
   0   6  11 1947.83 353.228   5
   0   6  12 548.366 311.359   5
   0  -6 -12 1115.64 328.405   2
   0   6  13-242.350 311.973   5
   0  -6 -13 75.3994 359.791   2
   0   6  13 412.777 313.613  11
   0   6  13-26.2429 261.083  12
   0   6  14 1478.78 355.240  11
   0  -6 -14 1839.01 403.109   2
   0   6  14 1097.64 347.135   5
   0  -6 -15 12.5937 405.486   2
   0   6  15-286.304 254.473  12
   0   6  16 4455.68 528.285  14
   0  -6 -16 3607.78 607.476   2
   0   6  17 101.593 269.232  14
   0   6  19 635.464 217.291  14
   0   6  20 370.924 315.276  34
   0   6  20-303.246 307.123  29
   0   6  20 237.830 172.666  14
   0   6  21 188.066 119.109  14
   0   6  22 51.9138 142.724  34
   0   7 -16-124.100 180.949  30
   0   7 -15-189.149 281.551  30
   0   7 -14-377.949 345.923  30
   0   7 -14-172.088 196.276   6
   0  -7  14-26.4929 252.227  23
   0   7 -13-519.322 410.456  30
   0   7 -13 58.3958 236.530   6
   0   7 -12-193.043 457.856  24
   0   7 -12-125.171 275.612  10
   0   7 -12-20.8963 450.518  30
   0   7 -12 384.391 267.948   6
   0   7 -11 97.2911 491.713  24
   0   7 -11-229.160 476.861  30
   0   7 -11 517.318 320.510  10
   0   7 -11-69.1007 280.023   6
   0   7 -10 298.205 504.661  30
   0   7 -10 535.177 508.736  24
   0   7 -10 251.489 357.000   2
   0   7 -10 46.4475 347.996  10
   0   7 -10 632.878 302.196   6
   0   7 -10 484.450 437.427   1
   0   7  -9 638.510 375.151  10
   0   7  -9 871.132 492.535  30
   0   7  -9 539.361 447.416   3
   0   7  -9 605.696 504.713  24
   0   7  -9 350.447 422.148   1
   0   7  -9 415.581 375.001   2
   0   7  -9 665.681 302.235   6
   0   7  -8 292.616 356.139  10
   0   7  -8-200.755 282.763   6
   0   7  -8 207.563 406.200   1
   0   7  -8 26.0445 341.746   2
   0   7  -8-726.607 480.265  24
   0   7  -8-185.813 427.421   3
   0   7  -7 1159.18 296.440   6
   0   7  -7 1668.22 435.290   3
   0   7  -7 1190.22 344.285   2
   0   7  -7 964.910 338.905  15
   0   7  -7 1003.42 462.944  24
   0   7  -7 1926.46 408.572   1
   0   7  -7 927.634 353.325  10
   0   7  -6 1798.60 410.156   3
   0   7  -6 1565.63 337.604   2
   0   7  -6 1569.62 392.247   1
   0   7  -5-300.054 328.146   1
   0   7  -5 276.180 351.606   3
   0   7  -5-180.770 266.052   2
   0   7  -4 326.766 317.137   1
   0   7  -4-248.983 263.225   2
   0   7  -4-399.091 352.480   3
   0   7  -3 331.521 329.015   1
   0   7  -3 117.902 260.872   2
   0   7  -2 105.704 262.326   2
   0   7  -2 493.366 325.448   1
   0   7  -1 234.390 228.697   2
   0   7  -1 638.726 313.634   1
   0   7  -1 256.571 360.326   3
   0   7   0 1403.31 391.662   5
   0   7   0 1602.57 264.095   4
   0   7   0 1731.99 326.966   1
   0   7   0 1825.55 390.094   3
   0   7   0 1473.92 238.839   2
   0   7   1 2378.61 379.847   3
   0   7   1 1700.67 274.219   4
   0   7   1 1668.40 376.633   5
   0   7   1 2103.07 324.791   1
   0   7   2 7623.26 823.548   4
   0   7   2 7397.38 855.458   5
   0   7   2 8038.44 854.627   3
   0   7   2 8333.87 837.966   1
   0   7   3 520.188 265.424   5
   0   7   3 676.420 199.975   4
   0   7   3 499.444 262.465   3
   0   7   4 674.179 260.346   5
   0   7   4 501.823 223.703   4
   0   7   4 483.749 240.293   3
   0   7   5-23.6143 275.237   5
   0   7   5 466.895 255.938   4
   0   7   6 86.0890 290.995   4
   0   7   6-64.9801 277.503   5
   0   7   6 208.089 131.905   3
   0  -7  -6 192.888 205.399   2
   0  -7  -7 312.362 249.006   2
   0   7   7 2.65671 300.145   5
   0   7   8 3635.83 451.295   5
   0  -7  -8 3099.31 442.231   2
   0  -7  -9 76.0860 285.036   2
   0   7   9 421.992 262.960   5
   0   7  10-104.679 265.330   5
   0  -7 -10-139.142 286.642   2
   0   7  11-125.947 273.450   5
   0  -7 -11 35.7176 290.275   2
   0  -7 -12-13.7269 310.281   2
   0   7  12 290.048 286.829   5
   0   7  13 28.0277 274.717  12
   0  -7 -13 427.981 347.092   2
   0   7  13-269.192 314.912  11
   0   7  13-120.437 305.984   5
   0  -7 -14 28.2154 373.202   2
   0   7  14-128.553 286.049  12
   0   7  14 277.434 324.307   5
   0   7  15-74.3689 273.124  12
   0   7  15 303.461 311.768  14
   0   7  16 1790.47 384.344  11
   0   7  16 1600.67 348.950  14
   0   7  18-20.1743 249.786  14
   0   7  19 134.082 216.468  14
   0   7  20 253.007 185.652  14
   0   7  21-182.454 131.628  14
   0   7  21 610.019 247.478  29
   0   7  22 168.528 157.773  34
   0   8 -15-23.5871 193.025  30
   0   8 -14 227.131 281.833  30
   0   8 -14 340.542 170.757   6
   0   8 -13 580.042 218.116   6
   0   8 -13 581.598 350.818  30
   0   8 -12 1049.62 287.017  10
   0   8 -12 1057.51 268.501   6
   0   8 -12 723.274 413.021  30
   0   8 -11 716.028 443.162  30
   0   8 -11 1612.14 471.467  24
   0   8 -11 910.287 289.306   6
   0   8 -11 754.427 328.842  10
   0   8 -10 196.376 487.775  24
   0   8 -10 56.3666 461.005  30
   0   8 -10 662.225 293.693   6
   0   8 -10-31.5619 341.322  10
   0   8  -9 1286.46 451.849   1
   0   8  -9 1383.97 531.396  24
   0   8  -9 1968.14 347.047   6
   0   8  -9 1802.03 402.941  10
   0   8  -9 615.784 513.972  30
   0   8  -8 726.887 420.651   1
   0   8  -8 1021.80 508.873  24
   0   8  -8 325.202 377.775  10
   0   8  -8 1011.06 464.764   3
   0   8  -8 737.386 486.409  30
   0   8  -8 622.151 308.353   6
   0   8  -7-227.046 355.666  21
   0   8  -7-320.406 430.197   3
   0   8  -7-24.3941 329.479  15
   0   8  -7 131.840 318.132   2
   0   8  -7 26.2627 356.759  10
   0   8  -7-293.974 398.128   1
   0   8  -6 907.991 344.376  10
   0   8  -6 1410.17 424.300   3
   0   8  -6 279.255 305.765   2
   0   8  -6 1139.12 385.527   1
   0   8  -6 1031.49 321.543  15
   0   8  -6 1068.67 372.329  21
   0   8  -5 150.157 368.303   3
   0   8  -5 124.574 350.278   1
   0   8  -5 114.838 266.920   2
   0   8  -4 1520.12 338.787   1
   0   8  -4 1028.61 280.081   2
   0   8  -3 2798.77 408.467   2
   0   8  -3 3888.21 456.735   1
   0   8  -2 3491.41 506.427   3
   0   8  -2 4343.88 469.148   1
   0   8  -2 2806.79 413.685   2
   0   8  -1 15679.5 1649.67   4
   0   8  -1 20347.9 1671.45   1
   0   8  -1 18478.3 1686.70   3
   0   8  -1 13963.5 1644.09   2
   0   8   0 3983.46 524.621   4
   0   8   0 5245.36 617.741   3
   0   8   0 5720.07 572.580   1
   0   8   1 14598.0 1360.90   1
   0   8   1 12324.6 1381.46   5
   0   8   1 13405.5 1379.20   3
   0   8   1 12071.9 1340.93   4
   0   8   2 6202.24 707.536   5
   0   8   2 5828.89 647.961   4
   0   8   2 5922.50 712.540   3
   0   8   3 9468.62 960.411   4
   0   8   3 8329.00 998.089   3
   0   8   3 9101.39 993.778   5
   0   8   4 473.826 305.218   3
   0   8   4 429.159 240.818   4
   0   8   4 588.736 311.567   5
   0   8   5 7430.49 826.751   4
   0   8   5 7801.26 836.666   5
   0   8   5 7485.82 823.205   3
   0   8   6 5592.45 675.646   4
   0   8   6 6074.04 680.661   5
   0   8   7 875.393 311.685   5
   0   8   8 19459.5 2015.56   5
   0   8   9 938.924 291.291   5
   0   8  10 7720.03 845.875   5
   0   8  11-57.4256 265.496   5
   0   8  12 437.401 280.205  14
   0   8  12 28.4993 275.968  12
   0   8  12 899.696 285.913   5
   0   8  13 502.540 303.966   5
   0   8  13-15.8450 423.576  29
   0   8  13-112.590 271.065  12
   0   8  13 256.456 296.748  14
   0   8  14 222.606 310.504  14
   0   8  14 157.000 272.129  12
   0   8  15 47.5694 342.306  11
   0   8  15-133.746 306.290  14
   0   8  15-78.9404 281.415  12
   0   8  16 385.666 328.877  11
   0   8  18 924.832 280.715  14
   0   8  19 65.3264 225.041  14
   0   8  20-190.175 173.866   7
   0   8  20-131.956 185.037  14
   0   8  21 54.6497 142.794  14
   0   8  21 143.883 141.326   7
   0   8  21 325.310 268.770  29
   0   8  22 127.182 96.8168   7
   0   8  22-290.424 166.164  34
   0   9 -14-61.7306 190.407  30
   0   9 -13 29.9939 279.400  30
   0  -9  13-63.3122 256.014  23
   0   9 -13 305.444 180.983   6
   0   9 -12 361.036 225.203   6
   0   9 -12 51.2513 339.284  30
   0   9 -12 729.721 236.344  10
   0   9 -11 322.753 385.563  30
   0   9 -11-555.101 426.948  24
   0   9 -11 52.7949 244.351   6
   0   9 -11 272.956 286.337  10
   0   9 -10-415.253 327.931  10
   0   9 -10-262.030 274.213   6
   0   9 -10-578.752 426.612  30
   0   9 -10 93.3294 473.198  24
   0   9  -9 233.639 290.164   6
   0   9  -9 55.4778 360.656  10
   0   9  -9 163.875 452.682  30
   0   9  -9 666.761 513.656  24
   0   9  -8 940.318 315.524   6
   0   9  -8 580.426 465.682  30
   0   9  -8 335.695 387.902  21
   0   9  -8 699.856 415.161   1
   0   9  -8 1372.20 474.980   3
   0   9  -8 749.151 388.847  10
   0   9  -7 3328.14 551.516   1
   0   9  -7 2351.64 581.388  30
   0   9  -7 3930.72 598.786   3
   0   9  -7 3532.13 487.837  15
   0   9  -7 3222.48 508.661  10
   0   9  -7 3293.99 529.318  21
   0   9  -6 158.297 386.951   1
   0   9  -6 318.509 362.758  10
   0   9  -6-56.6065 435.769   3
   0   9  -6 522.553 326.304  15
   0   9  -6 261.018 389.475  21
   0   9  -5-184.627 337.203  10
   0   9  -5 206.318 421.063   3
   0   9  -5-85.2017 294.730  15
   0   9  -5-144.903 366.397  21
   0   9  -5-29.0625 361.214   1
   0   9  -5 429.703 423.884  24
   0   9  -5-18.1786 271.986   6
   0   9  -4 110.718 255.908   6
   0   9  -4 22.4702 297.578  10
   0   9  -4 227.811 321.238   1
   0   9  -4 509.929 369.199  21
   0   9  -4-131.358 377.757  24
   0   9  -3 138.022 302.602   1
   0   9  -2-167.374 283.339   1
   0   9  -2 73.4008 348.795   3
   0   9  -1 1234.32 388.779   3
   0   9  -1 1837.99 339.043   1
   0   9   0 699.918 201.096   4
   0   9   0 839.041 361.212   3
   0   9   0 883.547 296.395   1
   0   9   1 145.772 352.812   3
   0   9   1 266.253 184.546   4
   0   9   1 127.290 287.820   1
   0   9   2 4488.62 475.809   4
   0   9   2 3742.39 557.839   3
   0   9   2 3795.17 565.671   5
   0   9   3 1841.18 382.489   5
   0   9   3 1687.91 277.219   4
   0   9   3 1990.01 375.489   3
   0   9   4 1269.67 379.774   5
   0   9   4 2290.61 302.276   4
   0   9   4 1782.61 366.900   3
   0   9   5 3728.95 463.088   4
   0   9   5 3846.49 489.377   5
   0   9   5 3552.31 470.355   3
   0   9   6 7175.15 792.422   4
   0   9   6 7298.57 806.777   5
   0   9   7 461.389 294.973   5
   0   9   8 3298.55 448.353   5
   0   9   9 1070.59 303.538   5
   0   9  10 1769.50 336.273   5
   0   9  11 976.335 300.459   5
   0   9  12 1495.08 345.759   5
   0   9  12 1679.01 337.062  12
   0   9  13 1282.30 337.624  11
   0   9  13 1195.73 335.042  12
   0   9  14-190.619 299.668  14
   0   9  14-44.5525 317.772  11
   0   9  14 367.172 301.415  12
   0   9  15 142.216 332.419  11
   0   9  15 234.360 313.303  12
   0   9  17-69.9323 275.905  14
   0   9  18 243.490 250.682  14
   0   9  18 55.8318 220.186   7
   0   9  18 192.253 409.645  34
   0   9  19 37.0113 196.664   7
   0   9  19 321.573 225.091  14
   0   9  20 144.553 166.312   7
   0   9  20-95.6170 187.749  19
   0   9  20 207.849 190.103  14
   0   9  21 123.897 138.112   7
   0   9  21 136.149 147.551  14
   0   9  22 195.553 99.2652   7
   0   9  22-59.5570 178.263  29
   0   9  22 131.149 97.2420  14
   0 -10  13 387.363 191.595  23
   0  10 -12 2478.14 273.008   6
   0  10 -12 770.914 326.467  30
   0  10 -11-525.464 318.379  30
   0  10 -11 193.022 261.840  10
   0  10 -11-232.186 222.710   6
   0  10 -10 299.131 374.310  30
   0  10 -10 635.971 309.375  10
   0  10 -10 657.880 265.901   6
   0  10  -9-70.8081 398.328  30
   0  10  -9 909.349 342.036  10
   0  10  -9 2.72042 276.487   6
   0  10  -8 721.283 436.880  30
   0  10  -8 899.766 387.914  21
   0  10  -8 1263.05 393.898  10
   0  10  -7 484.404 386.506  21
   0  10  -7 632.579 392.212   1
   0  10  -7 64.6389 434.267  30
   0  10  -7 537.701 391.261  10
   0  10  -7 687.578 467.417   3
   0  10  -6 3004.75 558.037  30
   0  10  -6 3550.15 597.584   3
   0  10  -6 3253.56 466.163   6
   0  10  -6 3099.59 475.824  15
   0  10  -6 3161.77 556.870  21
   0  10  -6 3385.42 519.457  10
   0  10  -6 3944.60 534.455   1
   0  10  -6 3179.03 616.681  24
   0  10  -5 930.775 421.766  21
   0  10  -5-282.814 321.345  15
   0  10  -5 72.2787 292.042   6
   0  10  -5-121.133 372.661   1
   0  10  -5-174.666 364.823  10
   0  10  -5-87.3684 465.651  24
   0  10  -4 992.236 440.617  24
   0  10  -4 1396.58 397.023  21
   0  10  -4 853.353 309.931  15
   0  10  -4 831.092 345.631  10
   0  10  -4 958.870 360.389   1
   0  10  -4 597.584 289.143   6
   0  10  -3 334.291 317.011   1
   0  10  -3 347.218 314.503  10
   0  10  -3 524.379 369.882  21
   0  10  -3-524.643 258.029   6
   0  10  -3 192.495 404.031   3
   0  10  -3 295.581 385.591  24
   0  10  -2 9427.45 960.205   1
   0  10  -2 7735.33 945.528  10
   0  10  -2 9604.29 987.604   3
   0  10  -1 2039.78 424.421   3
   0  10  -1 2087.54 365.181   1
   0  10   0 8614.21 1017.01   3
   0  10   0 9617.74 994.438   1
   0  10   1-235.136 275.094   1
   0  10   1-257.132 337.605   3
   0  10   2 17697.6 1816.30   5
   0  10   2 16964.8 1812.29   3
   0  10   3 36528.7 3462.39   5
   0  10   3 31175.4 3458.39   3
   0  10   4 7232.40 791.716   5
   0  10   4 6685.72 783.146   3
   0  10   5 17351.4 1742.30   5
   0  10   5 15365.1 1731.83   3
   0  10   5 17364.9 1725.56   4
   0  10   6 2496.02 366.466   4
   0  10   6 2712.06 402.208   5
   0  10   7 1627.45 329.400   5
   0  10   8 18461.3 1916.88   5
   0  10   9 3468.01 460.429   5
   0  10  10 14197.1 1492.90   5
   0  10  11 617.423 265.179  14
   0  10  11 249.545 289.096   5
   0  10  12 2458.60 385.782  14
   0  10  12 2635.40 334.880   7
   0  10  12 1834.09 482.681  34
   0  10  13 576.917 235.977   7
   0  10  13 834.702 304.369  12
   0  10  14 1513.22 360.201  12
   0  10  14 1791.86 294.194   7
   0  10  15 1201.27 274.002   7
   0  10  15 1389.14 341.900  14
   0  10  15 1068.17 490.039  34
   0  10  16 726.518 242.436   7
   0  10  16-36.7878 288.004  14
   0  10  16 391.727 466.641  34
   0  10  17 724.293 463.533  34
   0  10  17 1047.21 249.382   7
   0  10  17 813.450 290.200  14
   0  10  18 867.429 238.020   7
   0  10  18 1223.50 283.964  14
   0  10  19 642.016 203.803   7
   0  10  19 785.459 240.629  14
   0  10  20-7.84805 164.165   7
   0  10  20 316.278 186.792  14
   0  10  21 218.581 134.770   7
   0  10  21 221.738 148.619  14
   0  10  21 204.797 143.718  19
   0  10  22 161.756 97.7774  14
   0  10  22 109.125 92.1583   7
   0  10  22-157.708 160.078  34
   0 -11  12 314.842 214.808  23
   0  11 -11-222.157 210.192  10
   0  11 -11 344.381 187.402   6
   0  11 -10-54.8146 283.440  30
   0  11 -10 340.475 223.571   6
   0  11 -10 638.434 264.403  10
   0  11  -9-13.2188 313.345  10
   0  11  -9 298.620 330.827  30
   0  11  -8 230.596 353.025  10
   0  11  -8 234.891 359.903  21
   0  11  -8 30.8230 358.780  30
   0  11  -7 514.792 401.980  21
   0  11  -7 1635.89 327.234   6
   0  11  -7 1677.48 397.247  10
   0  11  -7 751.555 514.720  24
   0  11  -6 1089.92 395.696  10
   0  11  -6 1203.29 321.135   6
   0  11  -6 641.037 532.318  24
   0  11  -6 1173.48 433.028  21
   0  11  -5 37.1621 325.200  15
   0  11  -5-132.380 296.639   6
   0  11  -5 721.732 383.343  10
   0  11  -5-358.263 503.874  24
   0  11  -5-511.329 420.121  21
   0  11  -4 941.739 371.983   1
   0  11  -4 709.037 465.037   3
   0  11  -4 380.370 296.018   6
   0  11  -4 648.451 371.087  10
   0  11  -4 26.8604 319.341  15
   0  11  -4 1066.57 456.308  21
   0  11  -4 343.750 471.653  24
   0  11  -3-280.531 336.058   1
   0  11  -3 202.955 292.867  15
   0  11  -3 280.778 455.016   3
   0  11  -3 89.3318 268.533   6
   0  11  -3 467.950 430.964  24
   0  11  -3-4.28815 439.633  21
   0  11  -3 481.729 356.310  10
   0  11  -2 83.7415 396.166  21
   0  11  -2 196.418 262.025   6
   0  11  -2-158.780 400.363  24
   0  11  -2 65.8609 426.153   3
   0  11  -2-15.0259 326.381   1
   0  11  -1 16.2332 376.724  21
   0  11  -1 98.4340 410.777   3
   0  11  -1-195.078 311.206   1
   0  11  -1 190.232 358.475  24
   0  11   0 25.8166 295.496   1
   0  11   0 437.207 368.324   3
   0  11   0 244.988 293.931  10
   0  11   1 859.407 371.287   3
   0  11   2 2275.28 418.731   3
   0  11   3-210.584 314.907   3
   0  11   3 35.2480 342.655   5
   0  11   4 359.356 332.854   5
   0  11   4 675.789 315.008   3
   0  11   5 366.384 322.413   5
   0  11   5 83.5333 290.006   3
   0  11   6 83.5062 307.076   5
   0  11   7 101.572 286.860   5
   0  11   8-109.815 286.035   5
   0  11   9 8741.04 954.675   5
   0  11  10 307.970 244.282  14
   0  11  10 539.538 406.060  29
   0  11  10 297.491 289.687   5
   0  11  10-219.698 297.716  12
   0  11  11 257.419 261.240  14
   0  11  11 441.419 199.577   7
   0  11  11-17.8646 291.175  12
   0  11  12 489.226 214.181   7
   0  11  12 357.027 280.536  14
   0  11  13 399.801 309.538  14
   0  11  13 722.156 236.010   7
   0  11  14-231.113 231.099   7
   0  11  14-268.794 310.731  12
   0  11  15 1652.61 288.938   7
   0  11  16-17.8468 229.449   7
   0  11  17 605.161 269.022  14
   0  11  17 106.002 216.998   7
   0  11  18 106.736 244.542  14
   0  11  18 250.796 200.513   7
   0  11  19 250.819 212.162  14
   0  11  19 20.9397 180.907   7
   0  11  20 58.1046 154.613   7
   0  11  20 82.6911 186.159  14
   0  11  21 72.3013 155.655  19
   0  11  21 104.760 126.605   7
   0  11  21 73.8823 145.571  14
   0  11  22 19.1546 142.822  34
   0  11  22-25.2174 94.0726  14
   0  12 -11 131.687 142.886  10
   0  12 -11-100.993 144.773   6
   0  12 -10 2292.95 325.328  10
   0  12  -9 122.868 272.853  10
   0  12  -8-84.5835 245.501   6
   0  12  -8-140.857 320.295  10
   0  12  -8 400.163 425.650  24
   0  12  -7 874.125 287.350   6
   0  12  -7 292.362 481.785  24
   0  12  -7 820.411 364.363  10
   0  12  -7 1686.77 390.800  21
   0  12  -6 561.147 370.775  10
   0  12  -6-120.281 408.973  21
   0  12  -6 402.847 487.179  24
   0  12  -6-324.860 281.757   6
   0  12  -5 3670.74 567.230  21
   0  12  -5 4141.12 543.684  10
   0  12  -5 3247.30 491.908  15
   0  12  -5 4688.38 644.150  24
   0  12  -5 3595.49 483.499   6
   0  12  -4-126.528 470.296  21
   0  12  -4-64.9322 292.671   6
   0  12  -4-161.673 487.415  24
   0  12  -4 109.600 384.328  10
   0  12  -4 265.836 471.103   3
   0  12  -3 4325.69 594.198  10
   0  12  -3 3624.54 667.022   3
   0  12  -3 4224.08 659.263  21
   0  12  -3 4550.77 532.741   6
   0  12  -3 4575.15 656.637  24
   0  12  -2-207.125 443.187  24
   0  12  -2 799.846 450.348   3
   0  12  -2-309.930 277.440   6
   0  12  -2-396.723 456.945  21
   0  12  -1 197.262 454.285  21
   0  12  -1 18.1262 405.334  24
   0  12  -1 195.139 257.763   6
   0  12  -1 478.456 443.167   3
   0  12   0 383.879 405.222   3
   0  12   0 311.750 244.064   6
   0  12   0-11.3268 319.674  10
   0  12   0 296.603 381.697  24
   0  12   1 1996.66 396.038  24
   0  12   1 1211.31 354.631  10
   0  12   1 1794.19 424.495   3
   0  12   2 995.181 429.779  21
   0  12   2 482.827 384.845   3
   0  12   2 113.431 300.058  10
   0  12   3 72.5274 354.190   3
   0  12   3 199.001 408.990  21
   0  12   4 192.416 366.782   5
   0  12   4 523.002 337.655   3
   0  12   5 15.6452 340.034   5
   0  12   6 2048.73 400.298   5
   0  12   7-29.4408 326.858   5
   0  12   8 803.160 335.597   5
   0  12   9 2388.34 377.842   5
   0  12   9 1773.03 312.015  14
   0  12   9 1919.14 359.085  12
   0  12  10 2287.50 361.732  12
   0  12  10 1830.43 324.904  14
   0  12  10 1453.00 476.785  29
   0  12  11 1281.84 246.999   7
   0  12  11 1562.92 350.966  12
   0  12  11 1468.92 307.524  14
   0  12  12 187.213 276.822  14
   0  12  12 65.4874 323.290  12
   0  12  12 154.346 211.834   7
   0  12  13 4872.16 549.080   7
   0  12  13 4914.89 591.002  14
   0  12  14 203.895 293.780  14
   0  12  14-369.699 228.235   7
   0  12  15 539.637 225.334   7
   0  12  15 353.778 299.109  14
   0  12  16 251.050 215.456   7
   0  12  17 745.999 222.027   7
   0  12  18 432.187 240.557  14
   0  12  18-114.831 188.892   7
   0  12  19 402.509 209.297  14
   0  12  19 519.416 177.039   7
   0  12  20 830.932 160.051   7
   0  12  20 410.544 220.385  19
   0  12  20 523.087 192.602  14
   0  12  20 209.257 271.886  34
   0  12  21 13.7435 155.278  19
   0  12  21 294.925 142.485  14
   0  12  22-86.4517 86.0813  14
   0  13 -10 53.7814 154.824  10
   0  13  -9-271.897 178.997   6
   0  13  -9 66.8571 220.078  10
   0  13  -8 554.984 275.701  10
   0  13  -8 452.292 213.025   6
   0  13  -8-148.234 364.770  24
   0  13  -7 934.289 333.742  10
   0  13  -7 789.107 250.823   6
   0  13  -7 335.394 416.515  24
   0  13  -6 855.294 397.489  21
   0  13  -6 1025.98 370.836  10
   0  13  -6 1672.33 283.909   6
   0  13  -5 489.200 480.063  24
   0  13  -5 250.165 275.025   6
   0  13  -5 601.426 381.495  10
   0  13  -5 445.362 431.004  21
   0  13  -4 408.578 370.015  10
   0  13  -4 134.873 471.480  24
   0  13  -4 490.927 458.012  21
   0  13  -4 132.913 287.829   6
   0  13  -3-9.34227 463.096  21
   0  13  -3 69.5114 473.943  24
   0  13  -3 214.044 371.970  10
   0  13  -3-414.389 285.310   6
   0  13  -2-404.644 462.206   3
   0  13  -2 501.423 488.186  21
   0  13  -2 236.566 462.074  24
   0  13  -2-271.791 276.707   6
   0  13  -1 660.246 275.197   6
   0  13  -1-42.4579 462.422   3
   0  13  -1 483.931 490.039  21
   0  13  -1 340.787 445.148  24
   0  13   0 259.389 416.244  24
   0  13   0 51.9377 261.101   6
   0  13   0 1370.71 436.095   3
   0  13   0 1287.55 363.194  10
   0  13   1-28.5962 348.372  10
   0  13   1 691.048 390.875  24
   0  13   1 781.087 419.404   3
   0  13   2 2414.90 424.588  10
   0  13   2 2226.53 457.624  24
   0  13   2 3543.19 504.518   3
   0  13   2 2249.96 525.934  21
   0  13   3 1817.96 411.661  24
   0  13   3 3006.28 510.569  21
   0  13   3 2308.73 391.690  10
   0  13   3 1450.26 388.630  31
   0  13   3 2649.69 450.652   3
   0  13   4 1693.61 381.495  24
   0  13   4 1996.61 483.313  21
   0  13   4 1807.75 356.064  10
   0  13   5 2927.76 544.981  21
   0  13   5 2616.15 429.232  31
   0  13   5 3092.40 424.852  10
   0  13   5 3355.28 443.580  24
   0  13   6 2831.13 472.008  24
   0  13   6 3034.87 555.017  21
   0  13   7 440.745 364.165   5
   0  13   7 273.933 300.452  24
   0  13   8 5617.24 526.347   5
   0  13   8 2654.61 422.486  14
   0  13   9-161.363 429.930  29
   0  13   9 207.341 240.498  14
   0  13  10 877.524 267.781  14
   0  13  11 298.457 266.586  14
   0  13  12-13.6953 278.997  14
   0  13  13 461.296 486.179  29
   0  13  13 302.065 216.470   7
   0  13  13 88.1583 284.573  14
   0  13  13-168.956 374.282  34
   0  13  14 656.431 283.375  14
   0  13  14 351.853 214.650   7
   0  13  14-4.38978 370.445  34
   0  13  15-249.340 272.903  14
   0  13  15-77.4362 211.921   7
   0  13  15-88.5407 378.192  34
   0  13  16-155.251 367.065  34
   0  13  16 5.50850 275.776  14
   0  13  16 512.296 201.856   7
   0  13  17 593.962 200.503   7
   0  13  17-516.237 354.753  34
   0  13  18-193.884 323.874  34
   0  13  18-183.474 183.242   7
   0  13  19-189.954 286.005  34
   0  13  20-27.4125 166.777  14
   0  13  20 234.573 198.638  19
   0  13  20 369.975 238.371  34
   0  13  21-133.372 167.146  34
   0  13  21 213.812 150.574  19
   0  13  21 92.6901 127.797  14
   0  14  -9 2.23738 154.818  10
   0  14  -8 447.005 223.990  10
   0  14  -8 391.809 170.631   6
   0  14  -8 337.734 288.452  24
   0  14  -7-109.485 193.949   6
   0  14  -7-2.69904 346.621  24
   0  14  -7-325.531 270.464  10
   0  14  -6-402.169 390.706  24
   0  14  -6 452.889 226.850   6
   0  14  -6 294.658 311.973  10
   0  14  -5 79.3520 343.461  10
   0  14  -5 38.2327 238.212   6
   0  14  -5-42.3410 430.960  24
   0  14  -5 208.414 365.935  21
   0  14  -4 728.853 361.941  10
   0  14  -4 366.931 458.553  24
   0  14  -4-4.82299 261.903   6
   0  14  -4 186.449 403.784  21
   0  14  -3 3632.06 476.137   6
   0  14  -3 4454.79 552.993  10
   0  14  -3 3726.57 613.834  21
   0  14  -3 3551.84 616.702  24
   0  14  -2 145.365 266.168   6
   0  14  -2 255.857 482.897  21
   0  14  -2 1085.70 456.314  24
   0  14  -1 1953.92 347.432   6
   0  14  -1 1973.95 505.611  24
   0  14  -1 3176.75 539.769  21
   0  14   0 1296.33 419.064  10
   0  14   0 2495.84 492.432   3
   0  14   0 1706.67 308.285   6
   0  14   0 1208.28 474.202  24
   0  14   1 1538.02 396.353  10
   0  14   1 1365.74 468.837   3
   0  14   1 1263.68 450.682  24
   0  14   2 431.811 396.949  24
   0  14   2 382.580 346.772  31
   0  14   2 396.954 484.262  21
   0  14   2 672.470 424.005   3
   0  14   2 401.749 355.993  10
   0  14   3 5931.24 744.242  21
   0  14   3 4277.53 670.358  31
   0  14   3 6308.48 694.404  24
   0  14   3 6036.66 668.755  10
   0  14   4 56.4644 371.547  24
   0  14   4-203.103 324.538  31
   0  14   4 48.4115 323.951  10
   0  14   4-276.417 481.238  21
   0  14   5 5681.54 728.512  21
   0  14   5 4862.27 623.870  10
   0  14   5 6208.29 647.143  24
   0  14   5 4415.96 627.113  31
   0  14   6 940.602 319.269  31
   0  14   6 553.020 314.915  10
   0  14   6 1424.36 459.251  21
   0  14   6 1073.07 352.248  24
   0  14   7 5453.05 654.879  24
   0  14   7 5545.84 642.175  10
   0  14   9 262.022 238.097  14
   0  14  10 1421.79 290.659  14
   0  14  11 624.688 259.703  14
   0  14  12-144.944 266.330  14
   0  14  13 4658.49 771.329  29
   0  14  13 6176.68 659.393  14
   0  14  14 591.958 271.886  14
   0  14  14-7.66424 346.581  34
   0  14  15 1665.20 294.203  14
   0  14  15 616.443 371.575  34
   0  14  16 208.930 253.251  14
   0  14  16 832.459 333.838  34
   0  14  17 244.209 311.636  34
   0  14  17 336.907 236.896  14
   0  14  18 173.181 214.107  14
   0  14  18-44.3578 286.817  34
   0  14  19-227.679 241.291  34
   0  14  20-223.460 191.035  34
   0  14  20 6.20003 185.468  19
   0  14  21 114.451 133.008  19
   0  15  -8-23.1784 153.321  31
   0  15  -8-65.7993 143.688  10
   0  15  -7-60.2684 257.172  24
   0  15  -7-209.853 147.863   6
   0  15  -7-336.743 215.601  10
   0  15  -6 120.135 172.561   6
   0  15  -6-68.9447 250.576  10
   0  15  -6-495.378 321.512  24
   0  15  -5 833.003 297.478  10
   0  15  -5 284.422 365.062  24
   0  15  -5-62.0300 204.600   6
   0  15  -4 85.8009 318.380  10
   0  15  -4-81.5701 214.739   6
   0  15  -4 462.908 406.720  24
   0  15  -3 530.227 387.579  21
   0  15  -3 398.862 354.099  10
   0  15  -3-182.504 429.608  24
   0  15  -3 175.638 222.379   6
   0  15  -2 371.190 412.904  21
   0  15  -2 512.781 435.372  24
   0  15  -2-151.760 228.643   6
   0  15  -1-88.9332 230.874   6
   0  15  -1 321.349 440.151  24
   0  15  -1 332.224 473.831  21
   0  15   0 1086.84 439.431  24
   0  15   0 630.698 382.208  10
   0  15   1-340.293 372.514  10
   0  15   1 309.969 347.053  31
   0  15   1 308.413 417.320  24
   0  15   2 417.711 362.740  10
   0  15   2 246.838 404.869  24
   0  15   2 616.072 351.057  31
   0  15   2 472.387 456.923  21
   0  15   3-662.565 392.441  24
   0  15   3 248.575 497.933  21
   0  15   3 42.2136 345.976  10
   0  15   4 387.500 489.088  21
   0  15   4 205.368 342.264  10
   0  15   4 229.041 329.756  31
   0  15   4 471.503 375.501  24
   0  15   5-199.546 315.316  31
   0  15   5 343.119 336.924  10
   0  15   5 505.708 361.970  24
   0  15   5 992.760 500.452  21
   0  15   6 741.619 358.743  24
   0  15   6 145.673 321.135  10
   0  15   6 354.275 454.288  26
   0  15   7 815.561 323.255  10
   0  15   7 448.581 423.872  26
   0  15   7 941.237 348.406  24
   0  15  10-305.737 238.032  14
   0  15  11 418.189 247.168  14
   0  15  12 748.204 252.140  14
   0  15  12 45.5735 441.089  29
   0  15  13 175.507 252.334  14
   0  15  14 87.5222 249.848  14
   0  15  15 553.822 250.381  14
   0  15  16 20.5863 228.637  14
   0  15  17-95.5558 211.601  14
   0  15  17-20.7429 262.317  34
   0  15  18 439.028 201.302  14
   0  15  18 372.693 236.979  34
   0  15  19 407.708 205.927  19
   0  15  19 64.0630 171.195  14
   0  15  20 251.445 141.119  14
   0  15  20 361.747 170.332  19
   0  15  21 143.855 106.690  19
   0  16  -7 8.06873 174.033  26
   0  16  -6 62.8050 193.852  10
   0  16  -5-23.7332 146.088   6
   0  16  -5 302.967 237.057  10
   0  16  -5-106.380 283.633  24
   0  16  -5 38.9783 228.002  31
   0  16  -4 177.930 271.143  10
   0  16  -4-42.3967 346.125  24
   0  16  -4 254.783 165.102   6
   0  16  -4 171.516 261.737  31
   0  16  -3 357.210 377.634  24
   0  16  -3 446.997 183.311   6
   0  16  -3 84.4786 285.507  31
   0  16  -2 73.5538 192.823   6
   0  16  -2 72.2632 397.250  24
   0  16  -2 379.924 303.497  31
   0  16  -1 354.613 416.203  24
   0  16  -1 465.091 397.195  21
   0  16  -1 66.2705 311.255  31
   0  16   0 168.592 331.527  31
   0  16   0 593.640 410.587  24
   0  16   0 633.019 349.765  10
   0  16   1 1136.33 419.214  24
   0  16   1 749.841 363.515  10
   0  16   2 667.232 352.252  31
   0  16   2 1356.27 371.520  10
   0  16   2 1508.44 419.919  24
   0  16   2 1408.23 460.707  21
   0  16   3-208.541 486.281  21
   0  16   3 787.661 325.723  31
   0  16   3 254.867 398.679  24
   0  16   3 90.4440 347.351  10
   0  16   4 10110.3 1081.86  21
   0  16   4 11338.8 1016.54  10
   0  16   4 10632.9 1035.12  24
   0  16   5-76.8961 309.773  31
   0  16   5 18.9965 473.617  26
   0  16   5-465.039 330.081  10
   0  16   5 169.440 359.126  24
   0  16   6 2379.68 531.658  26
   0  16   6 3489.54 453.555  24
   0  16   6 2069.95 420.164  10
   0  16   7 382.752 427.843  26
   0  16   7 247.331 310.080  10
   0  16   7 901.052 344.897  24
   0  16  10-113.242 282.087  19
   0  16  11 1198.89 425.337  29
   0  16  13 8.85349 224.988  14
   0  16  14 32.8713 228.868  14
   0  16  15 619.377 231.046  14
   0  16  16 527.526 216.468  14
   0  16  17-100.151 192.363  14
   0  16  17 25.0816 247.084  19
   0  16  18 222.187 170.969  14
   0  16  19 55.2210 144.583  14
   0  16  20 209.804 135.837  19
   0  17  -5 326.085 159.094  10
   0  17  -5-33.6383 218.471  26
   0  17  -4-18.4147 210.024  10
   0  17  -4-88.1880 183.277  31
   0  17  -4-65.4010 236.560  24
   0  17  -3 500.245 289.139  24
   0  17  -3 139.738 226.125  31
   0  17  -2 196.851 330.362  24
   0  17  -2-295.835 246.919  31
   0  17  -1 188.841 356.823  24
   0  17  -1-91.5485 266.597  31
   0  17   0-48.7374 317.091  10
   0  17   0 98.1368 277.796  31
   0  17   0-270.330 369.408  24
   0  17   1-586.489 371.410  24
   0  17   1 55.8345 324.077  10
   0  17   1 119.345 292.529  31
   0  17   2-107.525 297.433  31
   0  17   2 774.585 331.440  10
   0  17   2 121.133 373.643  24
   0  17   3 27.6388 290.000  31
   0  17   3 332.130 379.444  24
   0  17   3 137.095 325.660  10
   0  17   4 169.992 320.183  10
   0  17   4 273.924 365.580  24
   0  17   4 118.304 291.033  31
   0  17   4 92.1191 446.987  26
   0  17   5 9.15824 354.831  24
   0  17   5-305.449 448.277  26
   0  17   5-225.573 326.396  10
   0  17   6 2819.85 409.977  10
   0  17   6 2293.67 499.080  26
   0  17   6 2593.63 438.333  24
   0  17   7 334.986 299.279  10
   0  17   7 65.4171 394.927  26
   0  17  11 767.140 268.508  19
   0  17  12-312.276 288.968  28
   0  17  12 227.926 258.163  19
   0  17  13 250.511 272.346  19
   0  17  14 514.414 267.418  19
   0  17  15-172.005 253.648  19
   0  17  16 526.846 246.614  19
   0  17  17 259.418 216.612  19
   0  17  18-38.5262 188.059  19
   0  17  19 409.350 151.194  19
   0  17  19-110.907 149.939  28
   0  18  -2 706.600 289.602  26
   0  18  -2 477.289 220.592  24
   0  18  -2 195.146 163.184  31
   0  18  -1-43.4383 260.249  24
   0  18  -1 34.3132 325.756  26
   0  18  -1 15.3487 249.977  10
   0  18  -1 207.705 195.539  31
   0  18   0 1588.96 284.751  10
   0  18   0 914.364 375.950  26
   0  18   0 957.946 304.698  24
   0  18   1 119.306 230.974  31
   0  18   1-23.8706 381.266  26
   0  18   1-231.607 313.025  24
   0  18   1 550.272 289.807  10
   0  18   2 868.706 339.898  24
   0  18   2 80.9980 406.670  26
   0  18   2 887.429 308.063  10
   0  18   3-34.6736 407.495  26
   0  18   3 547.415 329.518  24
   0  18   3 596.050 303.083  10
   0  18   4 1453.64 442.473  26
   0  18   4 2265.13 361.967  10
   0  18   4 1800.13 382.224  24
   0  18   5-73.6095 295.937  10
   0  18   5-333.654 387.808  26
   0  18   6-58.2343 378.937  26
   0  18   6 484.083 285.891  10
   0  18   7 883.301 291.850  10
   0  18  13 300.174 219.431  19
   0  18  14 1718.70 271.361  19
   0  18  14 1121.47 278.225  28
   0  18  15-110.196 217.148  28
   0  18  15-352.237 208.803  19
   0  18  16 650.348 202.522  19
   0  18  16-11.2365 201.225  28
   0  18  17 173.529 174.286  19
   0  18  17 15.8201 170.282  28
   0  18  18 76.7836 141.330  19
   0  19  -1-83.6579 220.575  26
   0  19  -1 11.7396 165.955  10
   0  19   0 53.4632 204.161  10
   0  19   0-269.189 259.174  26
   0  19   1 229.482 301.244  26
   0  19   1 86.0102 225.253  10
   0  19   2-250.860 315.024  26
   0  19   2 69.3515 247.303  10
   0  19   3-90.6745 326.189  26
   0  19   3-408.758 256.540  10
   0  19   4-88.2240 332.855  26
   0  19   4 352.695 266.413  10
   0  19   5 145.219 334.344  26
   0  19   5-200.388 245.350  10
   0  19   6 350.856 249.978  10
   0  19   6 84.1613 313.102  26
   0  20   2 181.036 159.945  10
   0  20   3 177.853 174.480  10
   0  20   3 112.948 220.411  26
   0  20   4 216.191 190.934  10
   0  20   5 297.157 184.333  10
  -1  20   5-293.322 173.012  10
  -1  20   4 157.843 175.411  10
  -1  20   3-212.527 161.480  10
  -1  19   7-120.596 228.374  10
  -1  19   6 2034.79 321.918  10
  -1  19   5-280.576 244.924  10
  -1  19   4 1025.99 314.332  26
  -1  19   4 996.331 295.571  24
  -1  19   3-217.855 291.133  26
  -1  19   3-160.252 241.058  10
  -1  19   3-328.898 261.631  24
  -1  19   2-156.877 278.891  26
  -1  19   2-264.379 239.444  10
  -1  19   2 138.557 236.488  24
  -1  19   1-21.9535 218.209  10
  -1  19   1 127.294 263.883  26
  -1  19   0 1.50213 231.851  26
  -1  19   0 49.6339 193.512  10
  -1  19  -1-20.3199 152.959  10
  -1  18  17 113.097 155.937  19
  -1  18  17 172.445 151.138  28
  -1  18  16-202.787 184.549  28
  -1  18  16 206.691 176.589  19
  -1  18  15 227.091 210.877  28
  -1  18  15 39.6523 202.088  19
  -1  18  14 242.489 203.673  19
  -1  18  14 251.635 235.277  28
  -1  18  13-66.0123 205.261  19
  -1  18  13-239.096 232.119  28
  -1  18   7 303.446 274.284  10
  -1  18   7 675.153 305.327  24
  -1  18   6 119.549 267.245  10
  -1  18   6 209.138 312.583  24
  -1  18   5-242.538 326.073  24
  -1  18   5 392.621 344.857  26
  -1  18   5 42.4635 285.047  10
  -1  18   4 143.824 288.211  10
  -1  18   4 223.746 361.223  26
  -1  18   4 646.388 328.093  24
  -1  18   3 126.135 328.793  24
  -1  18   3 336.294 288.174  10
  -1  18   3 212.143 369.902  26
  -1  18   2 151.771 361.903  26
  -1  18   2 1059.99 332.889  24
  -1  18   2-44.5745 285.091  10
  -1  18   1-67.1336 275.987  10
  -1  18   1-96.3571 361.943  26
  -1  18   1-90.4271 314.415  24
  -1  18   0-173.260 278.401  10
  -1  18   0-690.046 307.230  24
  -1  18   0-660.509 341.280  26
  -1  18  -1 16.2679 268.840  24
  -1  18  -1-78.2549 303.719  26
  -1  18  -2 195.245 227.925  24
  -1  18  -2 339.281 270.296  26
  -1  18  -3-10.3160 215.111  26
  -1  17  19 160.077 117.267  19
  -1  17  18 157.967 165.263  19
  -1  17  18 245.797 176.765  28
  -1  17  17-264.541 200.994  19
  -1  17  17-49.8554 214.191  28
  -1  17  16 272.638 226.453  19
  -1  17  15 283.946 242.442  19
  -1  17  14 508.287 285.992  28
  -1  17  14-67.8102 261.393  19
  -1  17  13 99.8766 259.434  19
  -1  17  13-126.046 286.585  28
  -1  17  12 667.616 275.656  19
  -1  17  12 209.845 296.282  28
  -1  17  11 176.165 286.699  28
  -1  17  11-191.046 254.636  19
  -1  17   8 80.0234 323.104  24
  -1  17   8 573.494 278.740  10
  -1  17   7 2255.43 405.330  24
  -1  17   7 1990.39 360.336  10
  -1  17   6 375.646 345.269  24
  -1  17   6-92.2788 304.105  10
  -1  17   5 740.283 415.673  26
  -1  17   5 1079.24 328.076  10
  -1  17   5 1078.30 374.526  24
  -1  17   4 2351.36 388.527  10
  -1  17   4 2510.76 435.131  24
  -1  17   4 1272.07 460.005  26
  -1  17   3 1442.46 380.950  24
  -1  17   3 388.039 335.384  10
  -1  17   2 996.389 330.280  10
  -1  17   2 598.882 390.004  24
  -1  17   1 3.09038 383.981  24
  -1  17   1 401.276 317.150  10
  -1  17   0 633.848 366.592  24
  -1  17   0 588.145 315.591  10
  -1  17   0 120.747 249.372  31
  -1  17  -1-550.786 350.761  24
  -1  17  -1 308.613 233.458  31
  -1  17  -2 247.201 331.460  24
  -1  17  -2 19.7371 212.979  31
  -1  17  -3 44.4787 189.543  31
  -1  17  -3 117.694 294.024  24
  -1  17  -3 478.634 253.937  10
  -1  17  -4 349.710 207.807  10
  -1  17  -4 61.7318 238.554  24
  -1  17  -5 427.956 159.310  10
  -1  16  20-46.6325 103.465  19
  -1  16  17-53.9167 185.160  14
  -1  16  17 140.211 229.121  19
  -1  16  16 336.409 201.596  14
  -1  16  16 33.1694 263.306  19
  -1  16  15 272.801 220.479  14
  -1  16  15 300.102 278.029  19
  -1  16  14 327.392 294.442  19
  -1  16  14-254.582 226.725  14
  -1  16  13 359.939 304.878  19
  -1  16  12 331.107 301.437  19
  -1  16  11 152.411 297.961  19
  -1  16  10 345.197 324.922  28
  -1  16  10 896.587 298.966  19
  -1  16   9-496.976 320.111  24
  -1  16   9-35.9775 310.436  28
  -1  16   8 1596.38 392.656  24
  -1  16   8 2041.50 355.427  10
  -1  16   7 775.734 353.957  24
  -1  16   7 269.339 300.953  10
  -1  16   6 81.5086 309.687  10
  -1  16   6 578.975 394.953  26
  -1  16   5 829.308 378.233  24
  -1  16   5-340.789 437.620  21
  -1  16   5 161.967 326.308  10
  -1  16   5-376.160 436.275  26
  -1  16   4-94.4188 457.171  21
  -1  16   4 389.744 335.804  10
  -1  16   4 135.126 383.248  24
  -1  16   3-173.871 456.251  21
  -1  16   3 306.796 393.433  24
  -1  16   3-153.607 341.456  10
  -1  16   2 108.300 311.130  31
  -1  16   2 1031.21 453.911  21
  -1  16   2 1527.11 355.984  10
  -1  16   2 1489.94 416.210  24
  -1  16   1-217.258 344.278  10
  -1  16   1 414.792 295.709  31
  -1  16   1 249.411 404.543  24
  -1  16   1-853.255 434.452  21
  -1  16   0-513.273 414.430  24
  -1  16   0-35.1750 337.783  10
  -1  16  -1 214.376 407.508  24
  -1  16  -1 41.1654 427.391  21
  -1  16  -2 155.982 276.185  31
  -1  16  -2 3.77395 376.103  21
  -1  16  -2 48.8025 188.286   6
  -1  16  -2-35.1084 395.100  24
  -1  16  -3-130.433 258.907  31
  -1  16  -3 276.551 307.343  10
  -1  16  -3-74.4563 176.612   6
  -1  16  -3 191.697 372.723  24
  -1  16  -4 165.904 161.128   6
  -1  16  -4 124.539 340.191  24
  -1  16  -4 32.0520 280.819  10
  -1  16  -4-185.385 237.838  31
  -1  16  -5 197.730 289.451  24
  -1  16  -5 85.5187 138.099   6
  -1  16  -5 268.304 237.755  10
  -1  16  -6-48.3663 187.566  10
  -1  16  -6-199.280 227.049  24
  -1  16  -6-84.5018 153.761  31
  -1  16  -7 131.998 171.977  26
  -1  15  20 118.373 138.542  19
  -1  15  19 675.258 169.827  14
  -1  15  19 614.823 206.082  19
  -1  15  18 600.406 186.691  14
  -1  15  18-129.474 216.154  34
  -1  15  17 542.185 206.275  14
  -1  15  17-72.5577 255.598  34
  -1  15  16 77.8016 285.063  34
  -1  15  16 526.897 290.326  19
  -1  15  16 647.701 230.886  14
  -1  15  15 15.6713 301.904  34
  -1  15  15 97.5521 240.909  14
  -1  15  14 1235.73 282.543  14
  -1  15  13-10.1956 252.907  14
  -1  15  12 5155.14 592.905  14
  -1  15  11 687.149 264.763  14
  -1  15  10 3401.83 496.681  24
  -1  15  10 3887.67 496.713  19
  -1  15   9 2118.06 389.553  24
  -1  15   9 1917.84 373.613  19
  -1  15   8 2167.96 457.626  28
  -1  15   8 3579.23 435.566  10
  -1  15   8 3461.31 468.881  24
  -1  15   7 24.0541 311.272  10
  -1  15   7 244.804 345.713  24
  -1  15   6 224.039 358.509  24
  -1  15   6 64.0394 314.349  10
  -1  15   6 653.417 427.470  21
  -1  15   5 676.796 420.080  24
  -1  15   5 1480.31 502.354  21
  -1  15   4 887.038 265.030  15
  -1  15   4 964.828 351.392  10
  -1  15   4 730.790 400.834  24
  -1  15   4 487.033 487.969  21
  -1  15   3 1704.74 406.197  31
  -1  15   3 2689.40 527.174  21
  -1  15   3 2188.92 481.299  24
  -1  15   2 1649.65 448.914  24
  -1  15   2 2080.95 396.002  10
  -1  15   2 1069.36 523.594  21
  -1  15   1 2809.47 434.635  10
  -1  15   1 2787.53 497.654  24
  -1  15   1 3523.08 549.325  21
  -1  15   0 72.5980 326.345  31
  -1  15   0-485.715 427.355  24
  -1  15  -1 292.725 443.074  24
  -1  15  -1 123.401 233.208   6
  -1  15  -1 120.257 454.015  21
  -1  15  -2 318.967 231.584   6
  -1  15  -2 977.722 426.971  24
  -1  15  -3 654.619 402.826  21
  -1  15  -3 406.348 234.749   6
  -1  15  -3 1001.87 349.276  10
  -1  15  -3 868.449 438.264  24
  -1  15  -4 62.3656 414.944  24
  -1  15  -4 650.079 319.546  10
  -1  15  -4 690.567 219.687   6
  -1  15  -4-46.6362 383.751  21
  -1  15  -5 1641.13 275.858   6
  -1  15  -5 1444.47 425.310  24
  -1  15  -5 2270.31 346.494  10
  -1  15  -6 339.413 175.597   6
  -1  15  -6 51.9199 326.180  24
  -1  15  -6 541.286 264.636  10
  -1  15  -7-102.972 263.378  24
  -1  15  -7 97.4079 199.039  31
  -1  15  -7 311.233 207.036  10
  -1  15  -7-200.934 141.808   6
  -1  15  -8 408.184 146.876  10
  -1  14  20-101.161 160.488  34
  -1  14  20-65.7871 162.175  19
  -1  14  19-97.5366 228.377  34
  -1  14  19-163.677 210.069  19
  -1  14  18-105.749 266.286  34
  -1  14  18 287.633 252.688  19
  -1  14  17-2.21360 221.616  14
  -1  14  17-118.173 303.822  34
  -1  14  16 49.2044 233.412  14
  -1  14  16-47.5324 334.939  34
  -1  14  15 266.276 261.432  14
  -1  14  15 626.416 349.493  34
  -1  14  14 741.569 272.456  14
  -1  14  14-318.963 360.827  34
  -1  14  13 217.442 344.214  34
  -1  14  13 96.7712 272.935  14
  -1  14  12 547.013 279.222  14
  -1  14  11 715.711 275.691  14
  -1  14  11 669.310 324.364  24
  -1  14  10 684.328 439.260  29
  -1  14  10 406.877 267.002  14
  -1  14  10 203.080 321.869  24
  -1  14   9 90.5275 249.458  14
  -1  14   9 82.3937 321.263  24
  -1  14   8 455.793 329.428  24
  -1  14   7-52.1782 343.415  24
  -1  14   7 233.345 409.335   5
  -1  14   6 456.582 433.759   5
  -1  14   6-39.9264 336.028  24
  -1  14   6 36.0164 411.984  21
  -1  14   5 415.786 321.842  10
  -1  14   5 495.131 428.690  21
  -1  14   5 242.348 356.660  24
  -1  14   4 31.5759 373.757  24
  -1  14   4-4.70479 321.406  10
  -1  14   4 490.092 462.220  21
  -1  14   3 609.266 391.029  24
  -1  14   3-739.668 342.473  10
  -1  14   3-294.266 476.746  21
  -1  14   2 243.196 320.696  31
  -1  14   2 74.8623 400.504  24
  -1  14   2 338.261 264.415  15
  -1  14   2-229.087 358.169  10
  -1  14   2 133.749 487.969  21
  -1  14   1 250.975 423.180  24
  -1  14   1-524.527 365.648  10
  -1  14   1-140.640 465.884  21
  -1  14   1-39.4210 430.238   3
  -1  14   1-224.946 275.991  15
  -1  14   0 519.185 438.656  24
  -1  14   0 329.133 253.185   6
  -1  14   0 262.144 287.069  15
  -1  14   0 711.122 438.267   3
  -1  14  -1-232.409 287.595  15
  -1  14  -1-722.092 470.608  21
  -1  14  -1 92.6909 441.962  24
  -1  14  -1 231.853 252.835   6
  -1  14  -2 984.709 297.203   6
  -1  14  -2 1228.11 498.918  21
  -1  14  -2 1864.42 477.169  24
  -1  14  -2 1389.79 320.601  15
  -1  14  -3 290.061 370.306  10
  -1  14  -3-270.778 450.808  24
  -1  14  -3 207.263 443.734  21
  -1  14  -3-429.617 266.664   6
  -1  14  -4-114.725 243.441   6
  -1  14  -4-371.317 453.948  24
  -1  14  -4 478.263 363.476  10
  -1  14  -4-813.511 433.270  21
  -1  14  -5-728.526 446.478  24
  -1  14  -5-31.8765 336.370  10
  -1  14  -5-78.0323 400.575  21
  -1  14  -5-91.4740 233.218   6
  -1  14  -6 436.540 315.793  10
  -1  14  -6 327.554 401.703  24
  -1  14  -6 282.046 223.397   6
  -1  14  -7 38.3801 267.161  10
  -1  14  -7 24.7995 351.157  24
  -1  14  -7 237.340 196.183   6
  -1  14  -8-37.5761 292.315  24
  -1  14  -8-534.594 170.956   6
  -1  14  -8-71.7925 222.989  10
  -1  14  -9 158.887 153.513  10
  -1  14  -9 213.587 126.779   6
  -1  13  21-99.5478 105.358  14
  -1  13  21 60.1330 115.166  19
  -1  13  20-137.030 150.815  14
  -1  13  20 109.167 174.071  19
  -1  13  20-10.1859 211.055  34
  -1  13  19 60.8868 274.282  34
  -1  13  19 671.494 196.739  14
  -1  13  19 518.489 228.443  19
  -1  13  18 248.070 311.949  34
  -1  13  17 574.924 361.217  34
  -1  13  17 1151.60 219.746   7
  -1  13  16 136.889 363.216  34
  -1  13  16-31.4929 203.132   7
  -1  13  15 390.188 275.148  14
  -1  13  15 367.899 380.276  34
  -1  13  15 808.246 225.639   7
  -1  13  14 407.421 222.351   7
  -1  13  14 177.121 389.714  34
  -1  13  14 453.055 279.657  14
  -1  13  13 13.3864 392.179  34
  -1  13  13 592.525 293.448  14
  -1  13  12 697.724 321.968  24
  -1  13  12 1048.71 299.278  14
  -1  13  12 657.535 391.556  34
  -1  13  11 260.330 307.674  24
  -1  13  11-104.891 461.240  29
  -1  13  11 259.831 354.552  34
  -1  13  11 35.5355 274.470  14
  -1  13  10-271.823 315.517  24
  -1  13  10-67.3575 267.036  14
  -1  13   9 582.830 374.909   5
  -1  13   9 480.279 262.579  14
  -1  13   9 704.079 320.517  24
  -1  13   8 358.727 320.243  24
  -1  13   8 255.265 379.755   5
  -1  13   8 69.9279 234.191  14
  -1  13   7 2269.88 423.277  24
  -1  13   7 2414.40 371.480  14
  -1  13   6 1212.27 431.858  21
  -1  13   6 1566.05 435.553   5
  -1  13   6 1799.68 364.349  24
  -1  13   5 184.611 414.994   5
  -1  13   5 383.599 325.009  24
  -1  13   5 554.260 430.485  21
  -1  13   4 3890.17 591.539  21
  -1  13   4 3448.98 507.986  24
  -1  13   3 320.157 449.867  21
  -1  13   3 277.220 292.126  31
  -1  13   3 183.083 384.358   3
  -1  13   3-591.075 314.078  10
  -1  13   3 138.198 355.037  24
  -1  13   2 638.728 326.811  10
  -1  13   2 939.657 378.556  24
  -1  13   2 106.399 396.251   3
  -1  13   2 361.467 464.559  21
  -1  13   1 2665.94 440.679  10
  -1  13   1 2305.53 379.628  15
  -1  13   1 3214.54 489.648  24
  -1  13   1 2879.34 538.426  21
  -1  13   1 2564.19 517.938   3
  -1  13   0 2286.62 338.631  15
  -1  13   0 1474.90 322.310   6
  -1  13   0 1804.99 466.688  24
  -1  13   0 1920.64 481.436   3
  -1  13  -1 860.349 464.203  24
  -1  13  -1 1191.19 319.578  15
  -1  13  -1 1477.87 307.604   6
  -1  13  -1 1359.67 483.806   3
  -1  13  -1 1309.16 475.763  21
  -1  13  -2 1707.08 403.104  10
  -1  13  -2 1360.31 310.464   6
  -1  13  -2 1824.87 487.379  24
  -1  13  -2 1298.79 483.898  21
  -1  13  -2 1422.92 339.033  15
  -1  13  -2 1248.98 494.031   3
  -1  13  -3 604.340 285.301   6
  -1  13  -3 10.2736 381.224  10
  -1  13  -3 581.728 451.226  21
  -1  13  -3 322.121 307.070  15
  -1  13  -3 298.545 475.086  24
  -1  13  -4 594.392 280.038   6
  -1  13  -4 760.706 383.088  10
  -1  13  -4 352.876 308.766  15
  -1  13  -4 363.819 484.899  24
  -1  13  -4 400.761 425.012  21
  -1  13  -5 414.305 292.608  15
  -1  13  -5 316.622 361.756  10
  -1  13  -5 363.990 430.433  21
  -1  13  -5 468.605 280.184   6
  -1  13  -5-104.465 485.754  24
  -1  13  -6-382.183 463.007  24
  -1  13  -6 261.581 344.126  10
  -1  13  -6 973.956 370.557  21
  -1  13  -6 159.917 254.752   6
  -1  13  -7 1715.16 491.242  24
  -1  13  -7 2330.08 400.887  10
  -1  13  -7 1876.09 409.994  21
  -1  13  -7 2594.63 340.228   6
  -1  13  -8 97.1303 210.552   6
  -1  13  -8-33.0564 274.195  10
  -1  13  -9 388.844 236.346  10
  -1  13  -9 638.362 190.147   6
  -1  13 -10 176.808 154.726  10
  -1  12  21-124.864 171.577  34
  -1  12  21-276.532 213.614  29
  -1  12  21-153.530 124.331  19
  -1  12  21-209.623 120.178  14
  -1  12  20-63.0120 165.973  14
  -1  12  20-448.040 245.085  34
  -1  12  20-1.48196 185.811  19
  -1  12  19 141.406 163.805   7
  -1  12  19-45.3745 298.520  34
  -1  12  19 93.6827 232.214  19
  -1  12  19 132.329 190.758  14
  -1  12  18 72.4651 187.195   7
  -1  12  18-327.513 338.335  34
  -1  12  18 342.575 223.468  14
  -1  12  17 1105.69 273.796  14
  -1  12  17 1013.65 225.161   7
  -1  12  16 109.694 217.554   7
  -1  12  15 421.284 233.629   7
  -1  12  14 294.097 232.234   7
  -1  12  14 611.944 306.162  14
  -1  12  13-89.8600 225.856   7
  -1  12  13-241.824 298.755  14
  -1  12  13-289.971 307.288  24
  -1  12  12 160.781 458.491  29
  -1  12  12 245.984 288.198  14
  -1  12  12 20.6782 221.625   7
  -1  12  12-53.2175 308.277  24
  -1  12  12-68.9088 400.406  34
  -1  12  11-149.501 384.394  34
  -1  12  11 794.157 291.687  14
  -1  12  11 695.644 226.744   7
  -1  12  11 420.192 306.966  24
  -1  12  10 1728.18 356.231  24
  -1  12  10 2018.68 328.652  14
  -1  12  10 2486.47 404.483   5
  -1  12   9 3074.40 426.306  14
  -1  12   9 2915.68 454.310  24
  -1  12   9 4186.15 498.918   5
  -1  12   8 621.957 249.020  14
  -1  12   8 971.486 352.889   5
  -1  12   8 923.315 302.693  24
  -1  12   7 5337.21 665.619   5
  -1  12   6-139.314 363.443   5
  -1  12   5 561.353 366.824   5
  -1  12   4 1199.67 410.046   5
  -1  12   4 1178.26 355.104   3
  -1  12   3 2303.03 449.658  24
  -1  12   3 3907.24 524.912   5
  -1  12   3 2594.05 512.981  21
  -1  12   3 3986.95 487.651   3
  -1  12   2 1140.12 373.980   3
  -1  12   2 160.154 386.016  21
  -1  12   2 479.021 343.859  24
  -1  12   1 83.3932 353.330  24
  -1  12   1 313.095 385.034   3
  -1  12   1 478.957 301.717  10
  -1  12   1 388.138 234.899  15
  -1  12   1 394.969 435.569  21
  -1  12   0 256.344 253.412  15
  -1  12   0 163.171 241.477   6
  -1  12   0 35.1945 384.751  24
  -1  12   0 140.087 408.956   3
  -1  12  -1 501.730 414.830  24
  -1  12  -1 29.3231 265.849   6
  -1  12  -1-692.018 425.914  21
  -1  12  -1 61.6483 273.246  15
  -1  12  -1 60.8664 431.175   3
  -1  12  -2 601.907 444.939  24
  -1  12  -2 393.453 431.292  21
  -1  12  -2 226.312 363.914  10
  -1  12  -2 982.108 448.017   3
  -1  12  -2-33.5067 298.240  15
  -1  12  -2 454.459 282.334   6
  -1  12  -3 659.744 291.624   6
  -1  12  -3 67.3944 314.191  15
  -1  12  -3 89.1748 468.867   3
  -1  12  -3 359.236 473.398  21
  -1  12  -3 440.377 372.866  10
  -1  12  -3 908.933 463.618  24
  -1  12  -4 458.624 323.154  15
  -1  12  -4-255.471 288.088   6
  -1  12  -4-121.607 361.579  10
  -1  12  -4-104.804 462.990  21
  -1  12  -4-53.4385 478.423   3
  -1  12  -4 335.140 466.864  24
  -1  12  -5 1219.22 362.085  15
  -1  12  -5 1807.66 463.417  21
  -1  12  -5 1892.60 418.942  10
  -1  12  -5 1644.62 331.026   6
  -1  12  -5 971.170 504.858  24
  -1  12  -6-33.1887 276.726   6
  -1  12  -6 303.343 406.552  21
  -1  12  -6 325.655 307.240  15
  -1  12  -6-488.998 485.967  24
  -1  12  -6 178.655 372.238  10
  -1  12  -7 423.242 360.830  21
  -1  12  -7 183.899 359.759  10
  -1  12  -7-41.8224 274.774   6
  -1  12  -8-66.7434 328.625  21
  -1  12  -8-349.348 248.570   6
  -1  12  -8-65.1593 318.660  10
  -1  12  -9 313.117 276.385  10
  -1  12 -10 43.6538 219.601  10
  -1  11  21-264.779 199.007  34
  -1  11  21-46.8274 124.941  14
  -1  11  21-61.5632 232.216  29
  -1  11  20 256.093 146.586   7
  -1  11  20-203.464 266.637  34
  -1  11  20 190.531 170.462  14
  -1  11  20-111.183 191.072  19
  -1  11  19 144.474 326.066  34
  -1  11  19 434.702 245.086  19
  -1  11  19 881.471 208.322  14
  -1  11  19 601.395 187.410   7
  -1  11  18-40.1542 193.585   7
  -1  11  18-30.6487 228.734  14
  -1  11  17 2749.00 339.644   7
  -1  11  17 2160.46 376.748  14
  -1  11  16 811.821 246.029   7
  -1  11  16 791.113 287.665  14
  -1  11  15 230.506 303.620  24
  -1  11  15 408.172 237.771   7
  -1  11  14 476.330 242.911   7
  -1  11  14 457.046 315.762  24
  -1  11  13 568.471 231.724   7
  -1  11  13-478.017 314.414  24
  -1  11  12 318.738 227.083   7
  -1  11  12 195.744 305.594  24
  -1  11  12 439.226 474.053  29
  -1  11  12 330.977 296.442  14
  -1  11  11 1972.31 369.384  24
  -1  11  11 2371.05 412.499   5
  -1  11  11 2016.75 303.484   7
  -1  11  11 2065.29 359.668  14
  -1  11  10 1054.86 330.789   5
  -1  11  10 464.262 261.062  14
  -1  11  10 401.227 204.312   7
  -1  11   9 2079.90 325.896  14
  -1  11   9 1864.97 389.068   5
  -1  11   8 320.861 311.968   5
  -1  11   7 1535.23 348.101   5
  -1  11   6 2060.40 393.546   5
  -1  11   5 2032.56 392.929   5
  -1  11   5 1754.57 337.151   3
  -1  11   4-272.511 334.313   5
  -1  11   4 39.1568 304.501   3
  -1  11   3 664.436 365.109   5
  -1  11   3 1336.70 342.775   3
  -1  11   2 3415.22 480.599   3
  -1  11   2 2914.47 501.868   5
  -1  11   1 3861.01 556.189   3
  -1  11   0 5014.41 632.672   3
  -1  11   0 4549.22 600.633  24
  -1  11  -1 2032.97 436.998  24
  -1  11  -1 2749.55 486.411   3
  -1  11  -1 2402.01 345.781   6
  -1  11  -1 2089.16 460.472  21
  -1  11  -2 1608.08 343.129  15
  -1  11  -2 2086.41 379.870  10
  -1  11  -2 2490.36 342.500   6
  -1  11  -2 2373.49 455.192  21
  -1  11  -2 2323.28 487.416   3
  -1  11  -2 1391.30 450.351  24
  -1  11  -3-816.081 442.897  21
  -1  11  -3 654.888 299.115  15
  -1  11  -3 400.295 441.546   3
  -1  11  -3 394.440 428.658  24
  -1  11  -3 482.702 270.599   6
  -1  11  -3 58.9587 344.979  10
  -1  11  -4 7161.23 854.222  10
  -1  11  -4 8076.57 827.860   6
  -1  11  -4 6423.80 906.444  24
  -1  11  -4 7211.87 834.152  15
  -1  11  -4 9006.00 925.599   3
  -1  11  -4 6994.36 905.437  21
  -1  11  -5 1963.43 543.216  24
  -1  11  -5 1123.92 479.569  21
  -1  11  -5 2564.74 435.473  10
  -1  11  -5 2302.72 372.644   6
  -1  11  -5 1974.07 399.656  15
  -1  11  -6 2510.61 443.149  10
  -1  11  -6 1682.52 411.426  15
  -1  11  -6 2502.02 380.375   6
  -1  11  -6 2372.42 484.326  21
  -1  11  -7 182.417 284.447   6
  -1  11  -7 345.091 368.872  10
  -1  11  -7 275.319 408.554  21
  -1  11  -8-535.153 363.322  21
  -1  11  -8-59.1646 365.782  30
  -1  11  -8 535.304 344.921  10
  -1  11  -9 48.0152 315.646  21
  -1  11  -9 729.373 313.865  10
  -1  11  -9 184.408 336.650  30
  -1  11 -10 320.429 229.149   6
  -1  11 -10 402.366 292.725  30
  -1  11 -10 404.642 268.017  10
  -1  11 -10 451.537 388.492  24
  -1  11 -11-86.4260 219.751  10
  -1  11 -11-396.456 191.456   6
  -1  11 -12 390.814 155.008   6
  -1  10  21-2.16492 213.469  34
  -1  10  21 37.9308 128.476  14
  -1  10  21-241.348 250.182  29
  -1  10  21-143.571 122.513   7
  -1  10  20 29.9731 154.071   7
  -1  10  20-290.395 278.302  34
  -1  10  20 52.3508 179.412  19
  -1  10  20 35.0598 173.320  14
  -1  10  19 17.9259 210.170  14
  -1  10  19 185.888 182.496   7
  -1  10  18 28.4096 204.816   7
  -1  10  18-110.877 239.895  14
  -1  10  17 92.1580 275.567  24
  -1  10  17 239.036 264.111  14
  -1  10  17-313.989 224.838   7
  -1  10  16 342.032 282.803  14
  -1  10  16 358.865 305.841  24
  -1  10  16 364.289 239.881   7
  -1  10  15-163.182 313.122  24
  -1  10  15 43.1906 301.906  14
  -1  10  15 144.989 241.677   7
  -1  10  14 238.428 321.952  24
  -1  10  14 73.5521 240.347   7
  -1  10  14-61.8808 311.697  14
  -1  10  13 284.691 234.935   7
  -1  10  13 170.711 314.688  24
  -1  10  12 533.996 465.183  29
  -1  10  12 381.199 318.353  24
  -1  10  12 1386.33 245.381   7
  -1  10  12 870.390 360.453   5
  -1  10  11 718.390 326.121   5
  -1  10  11 452.219 214.052   7
  -1  10  11 460.992 275.919  14
  -1  10  10 161.125 251.071  14
  -1  10  10-216.431 304.098   5
  -1  10  10 467.159 294.164  12
  -1  10   9 1028.95 321.811   5
  -1  10   8 1227.24 332.941   5
  -1  10   7 2761.44 422.888   5
  -1  10   6 477.900 311.236   5
  -1  10   5 339.852 267.505   3
  -1  10   5 72.5653 310.082   5
  -1  10   4 417.303 327.325   5
  -1  10   4 371.457 298.637   3
  -1  10   3 1008.16 325.251   3
  -1  10   3 566.825 337.203   5
  -1  10   2 6015.38 704.050   3
  -1  10   2 5892.60 709.723   5
  -1  10   1-126.901 335.029   3
  -1  10   1 761.566 358.916   5
  -1  10   0 613.287 352.420   3
  -1  10   0 399.272 258.755   1
  -1  10  -1 1740.91 395.550   3
  -1  10  -1 1179.20 302.233   1
  -1  10  -2 233.230 384.956   3
  -1  10  -2 22.5339 350.988  24
  -1  10  -2-109.489 284.378   1
  -1  10  -2 88.9038 289.745  10
  -1  10  -3 731.975 318.107   1
  -1  10  -3 600.974 311.191  10
  -1  10  -3 1047.49 279.252  15
  -1  10  -3 497.928 387.764  24
  -1  10  -3 808.334 264.605   6
  -1  10  -3 622.232 414.910   3
  -1  10  -4 407.082 333.506  10
  -1  10  -4 79.6766 320.504   1
  -1  10  -4 236.030 414.243  24
  -1  10  -4 101.290 301.824  15
  -1  10  -4-375.227 421.774  21
  -1  10  -4 153.785 267.669   6
  -1  10  -5 699.091 287.808   6
  -1  10  -5 580.852 363.213  10
  -1  10  -5 226.392 418.972  21
  -1  10  -5 438.416 325.963  15
  -1  10  -5 392.307 353.613   1
  -1  10  -6-431.888 304.828   6
  -1  10  -6 76.6498 368.453  10
  -1  10  -6 252.889 338.911  15
  -1  10  -6 599.277 472.602   3
  -1  10  -6-502.087 425.351  21
  -1  10  -7 176.175 442.806  30
  -1  10  -7 578.458 380.000  10
  -1  10  -7 439.004 388.157  21
  -1  10  -7 730.043 475.379   3
  -1  10  -7-340.935 350.081  15
  -1  10  -8 449.901 366.628  10
  -1  10  -8 1040.59 506.468  24
  -1  10  -8 591.424 427.163  30
  -1  10  -8-122.068 383.486  21
  -1  10  -9 153.322 278.647   6
  -1  10  -9 175.391 485.063  24
  -1  10  -9 22.4999 342.726  21
  -1  10  -9 608.868 345.879  10
  -1  10  -9 494.396 406.562  30
  -1  10 -10 16.0132 371.909  30
  -1  10 -10 184.947 251.465   6
  -1  10 -10-147.294 299.791  10
  -1  10 -10 542.642 447.301  24
  -1  10 -11 77.2513 321.621  30
  -1  10 -11-115.030 388.326  24
  -1  10 -11 659.593 259.907  10
  -1  10 -11 264.651 227.616   6
  -1  10 -12 48.2364 190.347   6
  -1  10 -12-115.621 265.260  30
  -1  10 -13-52.0889 147.515   6
  -1  10 -13 308.697 188.010  30
   1 -10  13 431.374 203.859  23
  -1   9  22-2.55220 73.7209   7
  -1   9  21 43.3956 124.322   7
  -1   9  21 134.863 124.730  14
  -1   9  20 151.348 162.497   7
  -1   9  20 361.911 171.460  19
  -1   9  20 373.110 173.084  14
  -1   9  19-65.6185 207.214  14
  -1   9  19-39.5843 186.545   7
  -1   9  18 256.905 263.327  24
  -1   9  18 350.868 218.279   7
  -1   9  18 314.313 242.887  14
  -1   9  17-113.109 266.445  14
  -1   9  17 645.418 294.131  24
  -1   9  17 34.9440 231.544   7
  -1   9  16 615.343 249.129   7
  -1   9  16 432.018 474.024  34
  -1   9  16 279.576 317.300  24
  -1   9  16 158.267 285.701  14
  -1   9  15 57.7941 459.726  34
  -1   9  15 89.5401 297.743  14
  -1   9  15 228.563 322.762  24
  -1   9  14 1468.55 357.869  24
  -1   9  14 1177.14 332.421  14
  -1   9  13 1114.21 335.928  24
  -1   9  13 945.760 361.269   5
  -1   9  13 990.086 315.806  14
  -1   9  12 378.333 331.784   5
  -1   9  12 772.174 436.392  29
  -1   9  12 458.070 309.610  12
  -1   9  12 405.876 303.836  24
  -1   9  11 798.902 221.286   7
  -1   9  11 1207.43 321.961   5
  -1   9  11 614.127 281.561  12
  -1   9  10 9759.09 1054.54   5
  -1   9   9 983.246 310.485   5
  -1   9   8 15349.2 1608.56   5
  -1   9   7 531.601 302.115   5
  -1   9   6 28312.8 2913.89   5
  -1   9   5 224.334 320.692   5
  -1   9   5 223.373 281.689   3
  -1   9   4 11877.2 1229.61   3
  -1   9   4 11301.4 1238.91   5
  -1   9   3 5976.35 729.972   5
  -1   9   3 6515.75 723.793   3
  -1   9   2 1068.47 351.194   5
  -1   9   2 806.535 341.652   3
  -1   9   1 1456.47 369.715   5
  -1   9   1 1105.32 371.315   3
  -1   9   0 1617.83 379.246   3
  -1   9   0 1576.70 303.742   1
  -1   9  -1 4030.54 555.122   3
  -1   9  -1 4062.85 494.234   1
  -1   9  -2 94.6284 333.323   3
  -1   9  -2 80.3005 263.480   1
  -1   9  -3 1190.67 405.849   3
  -1   9  -3 1652.48 326.582   1
  -1   9  -4 5827.25 638.079   6
  -1   9  -4 6562.71 677.159   1
  -1   9  -4 4822.64 654.737  10
  -1   9  -5 770.527 339.579   1
  -1   9  -5 227.435 316.228  10
  -1   9  -5 203.720 273.175   6
  -1   9  -5 415.213 305.618  15
  -1   9  -6 8712.30 873.001   3
  -1   9  -6 5513.10 836.339  21
  -1   9  -6 7157.06 828.405   1
  -1   9  -6 7408.93 801.897  15
  -1   9  -6 6740.00 801.009  10
  -1   9  -7 6395.16 753.784  10
  -1   9  -7 5664.05 828.250  24
  -1   9  -7 5833.94 748.845  15
  -1   9  -7 7568.89 784.658   1
  -1   9  -7 7924.41 835.107   3
  -1   9  -7 5525.17 767.456  21
  -1   9  -8 827.985 320.784   6
  -1   9  -8 1396.17 521.620  24
  -1   9  -8 904.454 396.343   1
  -1   9  -8 856.237 485.532   3
  -1   9  -8 862.084 386.502  10
  -1   9  -8 1600.70 484.263  30
  -1   9  -8 571.987 386.289  21
  -1   9  -9 447.395 300.746   6
  -1   9  -9 371.796 458.564  30
  -1   9  -9 574.252 356.907  21
  -1   9  -9 63.6572 361.459  10
  -1   9  -9 175.547 494.826  24
  -1   9 -10 515.493 483.981  24
  -1   9 -10 107.490 327.452  10
  -1   9 -10-215.061 430.497  30
  -1   9 -10-229.085 282.006   6
  -1   9 -11 281.206 449.713  24
  -1   9 -11 930.995 406.217  30
  -1   9 -11 777.940 267.995   6
  -1   9 -11 980.586 303.649  10
  -1   9 -12 229.555 233.880   6
  -1   9 -12 1218.14 361.437  30
  -1   9 -13 119.095 183.099   6
  -1   9 -13 149.518 288.956  30
  -1   9 -14-72.2836 202.977  30
  -1   8  22 169.122 126.509  34
  -1   8  21-392.010 224.091  34
  -1   8  21-4.46475 118.309  14
  -1   8  21 48.0772 242.658  29
  -1   8  20 332.649 168.897  14
  -1   8  19-277.456 205.315  14
  -1   8  19 335.349 203.931  19
  -1   8  18-149.641 272.687  24
  -1   8  18 276.283 234.230  14
  -1   8  17 158.307 260.573  14
  -1   8  16 958.037 309.133  14
  -1   8  15 73.3945 306.868  14
  -1   8  14-220.666 340.189   5
  -1   8  14-39.4170 335.792  11
  -1   8  13 243.820 329.235   5
  -1   8  13-215.081 292.553  12
  -1   8  13 108.706 316.983  11
  -1   8  12 47.2981 297.978  11
  -1   8  12 164.532 260.561  12
  -1   8  12 500.795 312.907   5
  -1   8  11 684.001 309.467   5
  -1   8  10 638.771 291.468   5
  -1   8   9 3146.19 437.651   5
  -1   8   8 2408.11 394.806   5
  -1   8   7-298.193 308.594   5
  -1   8   6 3390.92 471.101   5
  -1   8   5 5182.12 622.014   5
  -1   8   4-57.9076 315.550   5
  -1   8   4-195.550 287.371   3
  -1   8   3 4898.51 518.452   4
  -1   8   3 4324.18 585.014   5
  -1   8   3 4460.21 576.917   3
  -1   8   2 9339.56 1139.16   5
  -1   8   2 9867.41 1137.82   3
  -1   8   2 10939.9 1088.25   4
  -1   8   1 8652.73 974.949   3
  -1   8   1 7952.22 980.873   5
  -1   8   1 9363.10 942.472   1
  -1   8   0 1839.03 430.068   5
  -1   8   0 2199.17 412.189   3
  -1   8   0 2049.83 337.582   1
  -1   8  -1 1517.93 313.884   1
  -1   8  -1 1840.81 398.322   3
  -1   8  -2-279.308 277.043   1
  -1   8  -2 618.908 351.015   3
  -1   8  -3 67.8930 278.028   1
  -1   8  -4 21.8229 294.516   1
  -1   8  -5 2714.00 429.795   1
  -1   8  -5 2639.08 478.590   3
  -1   8  -6 878.561 414.402  24
  -1   8  -6 1441.13 364.475   1
  -1   8  -6 207.039 314.862  10
  -1   8  -6 1084.30 395.374   3
  -1   8  -6-145.146 312.074  15
  -1   8  -7-355.447 340.306  10
  -1   8  -7 1159.82 438.571   3
  -1   8  -7 208.698 378.092   1
  -1   8  -7-173.014 331.238  15
  -1   8  -7 439.593 469.393  24
  -1   8  -7 256.665 365.673  21
  -1   8  -8 262.185 509.186  24
  -1   8  -8 365.446 361.035  15
  -1   8  -8 100.003 460.482   3
  -1   8  -8 580.100 307.734   6
  -1   8  -8 240.554 364.491  10
  -1   8  -8 643.429 368.317  21
  -1   8  -8 778.778 410.750   1
  -1   8  -9 184.619 519.681  24
  -1   8  -9-1028.36 407.247   1
  -1   8  -9-105.162 363.386  10
  -1   8  -9-110.183 303.881   6
  -1   8  -9 618.663 451.290   3
  -1   8 -10-25.6406 510.074  24
  -1   8 -10-48.1111 481.865  30
  -1   8 -10 128.979 345.297  10
  -1   8 -10 307.790 298.197   6
  -1   8 -11 80.1476 269.520   6
  -1   8 -11-575.497 478.321  24
  -1   8 -11 202.216 450.118  30
  -1   8 -11-208.799 303.804  10
  -1   8 -12 224.151 248.799   6
  -1   8 -12 83.5144 408.635  24
  -1   8 -12 121.435 405.234  30
  -1   8 -13 55.1548 355.414  30
  -1   8 -13 764.296 225.045   6
  -1   8 -14-231.569 179.021   6
  -1   8 -14-226.284 291.071  30
  -1   8 -15 456.411 216.018  30
  -1   7  21-55.5692 107.388  14
  -1   7  20 163.299 158.406  14
  -1   7  20 671.831 320.533  29
  -1   7  19-356.532 203.097  14
  -1   7  19 237.891 240.473  24
  -1   7  18 1245.79 257.149  14
  -1   7  18-177.523 426.542  34
  -1   7  17-308.710 263.448  14
  -1   7  16 709.320 295.775  14
  -1   7  15 2985.86 464.847  11
  -1   7  14 2364.63 414.719  14
  -1   7  14 2613.50 469.733   5
  -1   7  14 3354.77 444.068  11
  -1   7  13-104.056 297.045  14
  -1   7  13 693.490 348.228   5
  -1   7  13 462.897 277.203  12
  -1   7  12 3016.76 402.780   5
   1  -7 -12 2602.51 403.703   2
  -1   7  12 2490.12 365.551  14
   1  -7 -11 715.679 305.596   2
  -1   7  11 629.888 302.628   5
  -1   7  10 2459.73 386.843   5
   1  -7 -10 2211.72 381.961   2
  -1   7   9 1278.77 324.186   5
   1  -7  -9 1552.37 317.488   2
  -1   7   8 6471.66 659.500   5
   1  -7  -8 4909.29 643.183   2
  -1   7   7 11439.3 1215.40   5
  -1   7   6 801.607 319.404   5
  -1   7   5 1010.44 340.432   5
  -1   7   5 1135.17 264.327   3
  -1   7   4 32939.9 3298.57   5
  -1   7   4 31586.0 3291.72   3
  -1   7   3 63919.8 6701.79   5
  -1   7   3 68747.3 6693.05   4
  -1   7   3 61666.4 6699.16   3
  -1   7   2 10728.6 1270.90   5
  -1   7   2 10508.9 1270.11   3
  -1   7   2 12957.3 1241.62   4
  -1   7   1 71685.4 7310.48   4
  -1   7   1 74628.9 7317.29   1
  -1   7   1 70012.4 7324.26   3
  -1   7   1 68812.1 7326.32   5
  -1   7   0 6561.09 760.293   5
  -1   7   0 7360.77 711.099   1
  -1   7   0 5973.42 675.228   4
  -1   7   0 6799.77 753.684   3
  -1   7  -1 277.413 169.603   4
  -1   7  -1 652.527 361.038   3
  -1   7  -1 368.763 273.244   1
  -1   7  -1 176.414 186.680   2
  -1   7  -2 1350.00 320.174   1
  -1   7  -2 1010.06 266.369   2
  -1   7  -3 805.567 255.708   2
  -1   7  -3 931.472 313.639   1
  -1   7  -4 1711.15 348.493   1
  -1   7  -4 1627.59 304.628   2
  -1   7  -4 1476.76 386.722   3
  -1   7  -5 2939.13 471.511   3
  -1   7  -5 2751.76 406.475   2
  -1   7  -5 3219.40 444.066   1
  -1   7  -6 8965.78 1084.80   2
  -1   7  -6 10941.6 1107.65   1
  -1   7  -6 11252.6 1121.94   3
  -1   7  -7 5753.73 638.220   6
  -1   7  -7 5114.17 722.217  24
  -1   7  -7 6609.86 717.081   3
  -1   7  -7 5243.41 660.965  15
  -1   7  -7 5231.41 658.845  10
  -1   7  -7 4991.55 667.096   2
  -1   7  -7 6878.71 701.230   1
  -1   7  -8 586.002 335.845   2
  -1   7  -8-31.7344 389.516   1
  -1   7  -8 109.779 462.915  24
  -1   7  -8 974.531 339.284  10
  -1   7  -8 278.400 411.292   3
  -1   7  -8 225.111 281.137   6
  -1   7  -8-5.15739 341.686  15
  -1   7  -9 4345.54 616.535  10
  -1   7  -9 3633.03 717.244  24
  -1   7  -9 5091.78 684.862   3
  -1   7  -9 4209.16 628.032   2
  -1   7  -9 5759.98 677.455   1
  -1   7  -9 5717.14 590.222   6
  -1   7 -10-444.905 451.222   3
  -1   7 -10-59.8868 291.824   6
  -1   7 -10 185.532 404.558   1
  -1   7 -10-480.009 500.428  24
  -1   7 -10-35.2490 346.473  10
  -1   7 -11-682.018 288.282   6
  -1   7 -11 462.870 495.087  30
  -1   7 -11-162.206 329.249  10
  -1   7 -11 287.987 502.903  24
  -1   7 -12 1370.37 289.958   6
  -1   7 -12 429.388 471.712  30
  -1   7 -12 1127.59 478.321  24
  -1   7 -13 780.411 479.820  30
  -1   7 -13 2801.90 342.388   6
  -1   7 -14 1000.83 360.656  30
  -1   7 -14 185.152 203.733   6
  -1   7 -15 398.737 167.650   6
  -1   7 -15 593.959 294.518  30
  -1   7 -16 14.7017 197.110  30
  -1   6  21 254.787 122.338   7
  -1   6  20 57.1823 164.350   7
  -1   6  20 616.336 150.212  14
  -1   6  19 249.259 185.308  14
  -1   6  18-220.512 226.272  14
  -1   6  17 94.6618 250.222  14
  -1   6  15 1628.80 426.389   5
  -1   6  15 1629.01 355.923  14
   1  -6 -15 2595.13 449.509   2
  -1   6  14 889.522 319.383  14
  -1   6  14 390.767 375.736   5
   1  -6 -14 1126.45 395.085   2
   1  -6 -13 139.850 367.048   2
  -1   6  13-93.5168 350.774   5
  -1   6  13-138.346 243.055  12
  -1   6  13 138.343 285.417  14
   1  -6 -12 889.315 342.492   2
  -1   6  12 635.276 324.779   5
  -1   6  11 328.326 296.279   5
   1  -6 -11 48.7579 304.388   2
   1  -6 -10 84.2603 303.488   2
  -1   6  10 47.6000 293.583   5
   1  -6  -9 2473.46 419.710   2
  -1   6   9 2930.09 418.799   5
  -1   6   8 190.082 294.355   5
   1  -6  -8 151.500 303.456   2
   1  -6  -7 156.879 290.909   2
  -1   6   7 890.790 307.336   5
  -1   6   6 315.567 295.080   5
   1  -6  -6 461.384 240.533   2
  -1   6   5 184.942 247.373   5
   1  -6  -5 95.6806 162.006   2
  -1   6   5 26.7188 169.894   3
  -1   6   4 11153.0 1142.37   5
  -1   6   4 10701.6 1126.44   3
  -1   6   3 204.161 150.246   4
  -1   6   3 10.3127 205.459   3
  -1   6   3 222.633 227.367   5
  -1   6   2 1528.66 292.239   3
  -1   6   2 1614.51 283.660   5
  -1   6   2 1847.93 217.757   4
  -1   6   1 155.944 218.948   5
  -1   6   1 234.401 107.438   4
  -1   6   1 234.929 175.594   1
  -1   6   1 319.690 232.014   3
  -1   6   0 14812.5 1236.10   3
  -1   6   0 15948.4 1217.50   1
  -1   6   0 13285.3 1203.27   4
  -1   6  -1 91.1663 246.874   1
  -1   6  -1 151.237 190.147   2
  -1   6  -1 293.350 293.138   3
  -1   6  -2 1594.57 353.433   1
  -1   6  -2 1678.97 306.165   2
  -1   6  -3 649.868 280.564   2
  -1   6  -3 355.931 313.409   1
  -1   6  -3 104.485 350.660   3
  -1   6  -4 445.857 284.517   2
  -1   6  -4 549.462 355.313   3
  -1   6  -4 698.807 324.366   1
  -1   6  -5 540.025 317.069   1
  -1   6  -5 322.397 335.049   3
  -1   6  -5 262.024 282.460   2
  -1   6  -6 831.822 367.067   3
  -1   6  -6 1169.16 335.831   1
  -1   6  -6 1147.38 305.752   2
  -1   6  -7-50.2956 354.509   3
  -1   6  -7-25.8674 296.194   2
  -1   6  -7-277.925 324.740   1
  -1   6  -8-288.443 323.694   2
  -1   6  -8 170.448 373.568   1
  -1   6  -8-321.543 264.011   6
  -1   6  -8-174.531 381.195   3
  -1   6  -8-645.517 440.564  24
  -1   6  -8 166.051 317.195  15
  -1   6  -8 491.110 306.071  10
  -1   6  -9-329.702 353.238   2
  -1   6  -9 255.690 338.172  10
  -1   6  -9-6.47992 397.859   1
  -1   6  -9-106.291 487.247  24
  -1   6  -9 334.525 412.394   3
  -1   6  -9 364.727 279.706   6
  -1   6 -10 747.852 354.060  10
  -1   6 -10 702.951 387.813   2
  -1   6 -10 479.442 524.210  24
  -1   6 -10 767.118 300.294   6
  -1   6 -10 419.952 431.109   1
  -1   6 -10 702.260 452.443   3
  -1   6 -11 702.641 431.323   1
  -1   6 -11 460.650 506.462  24
  -1   6 -11 361.820 381.729   2
  -1   6 -11-933.790 527.367  30
  -1   6 -11 409.214 289.749   6
  -1   6 -12-194.434 494.659  30
  -1   6 -12 216.917 277.652   6
  -1   6 -12 220.450 478.793  24
  -1   6 -13-102.884 463.039  30
  -1   6 -13-499.238 255.275   6
  -1   6 -14 607.379 407.782  30
  -1   6 -14-163.296 224.796   6
  -1   6 -15-126.447 342.733  30
  -1   6 -15 373.248 182.716   6
  -1   6 -16 35.3094 269.775  30
  -1   6 -17 92.6284 174.132  30
  -1   5  21 81.0932 113.060   7
  -1   5  20 90.2380 182.765  24
  -1   5  19 67.2634 360.591  29
  -1   5  19-46.2195 331.564  34
  -1   5  19-6.07016 173.238  14
  -1   5  18 226.022 210.906  14
   1  -5 -17-3.50944 378.706  30
  -1   5  17 186.204 245.396  14
  -1   5  16 701.428 339.686  11
   1  -5 -16 30.7687 418.190  30
   1  -5 -15 312.945 433.022  30
  -1   5  15 208.978 350.524  11
  -1   5  15-138.641 370.762   5
   1  -5 -15-642.888 413.896   2
  -1   5  15 279.155 284.034  14
   1  -5 -14 1156.45 416.672   2
  -1   5  14 1044.30 314.334  14
  -1   5  13-109.004 246.780  12
   1  -5 -13 291.296 379.019   2
   1  -5 -12 7156.85 825.263   2
   1  -5 -11 6914.01 790.978   2
   1  -5 -10 20305.6 2111.11   2
   1  -5  -9 4647.19 590.721   2
   1  -5  -8 9236.32 1012.72   2
  -1   5   7 25860.7 2752.34   3
  -1   5   7 32005.4 2780.23   5
   1  -5  -7 29419.2 2775.84   2
  -1   5   6 11406.0 1144.04   5
   1  -5  -6 10390.9 1136.52   2
   1  -5  -5 17946.4 1916.10   2
  -1   5   5 19734.2 1922.34   5
   1  -5  -4 60849.1 6354.71   2
  -1   5   4 61394.0 6356.49   3
  -1   5   4 68685.1 6362.72   5
  -1   5   3 7225.90 767.058   4
  -1   5   3 7818.19 779.985   5
  -1   5   3 7202.14 769.186   3
  -1   5   2 177.683 163.779   3
  -1   5   2 169.254 106.536   4
  -1   5   2 169.847 183.019   5
  -1   5   1 23902.0 2625.23   1
  -1   5   1 26519.7 2621.00   4
  -1   5   1 25860.2 2630.83   3
  -1   5   0 3302.11 368.163   4
  -1   5   0 3552.77 415.271   3
  -1   5   0 4051.31 388.777   1
  -1   5   0 3425.24 368.613   2
  -1   5  -1 7398.48 768.107   1
  -1   5  -1 7156.22 755.631   2
  -1   5  -2 5511.42 612.064   2
  -1   5  -2 5808.30 626.084   1
  -1   5  -3 21374.5 2221.10   3
  -1   5  -3 20228.6 2216.02   1
  -1   5  -3 22381.6 2207.53   2
  -1   5  -4 27.0897 309.970   2
  -1   5  -4 356.770 326.357   1
  -1   5  -4 454.003 354.769   3
  -1   5  -5 18903.2 1991.49   1
  -1   5  -5 19298.7 1994.23   3
  -1   5  -5 19158.4 1981.53   2
  -1   5  -6 10185.3 1096.95   2
  -1   5  -6 9693.62 1103.57   1
  -1   5  -6 10797.9 1110.77   3
  -1   5  -7 18212.2 1786.10   3
  -1   5  -7 16684.2 1783.60   1
  -1   5  -7 16336.0 1773.10   2
  -1   5  -8 3941.46 548.171   1
  -1   5  -8 4216.51 565.066   3
  -1   5  -8 4148.93 542.154   2
  -1   5  -9 12959.5 1243.87   1
  -1   5  -9 11094.8 1225.98   2
  -1   5  -9 12396.6 1244.45   3
  -1   5  -9 11522.8 1192.31   6
  -1   5  -9 9942.66 1209.14  15
  -1   5  -9 10623.4 1249.78  24
  -1   5 -10 2691.64 423.779   6
  -1   5 -10 3019.65 523.662   3
  -1   5 -10 3464.38 580.422  24
  -1   5 -10 3172.09 497.486   2
  -1   5 -10 3327.81 532.704   1
  -1   5 -11 278.775 396.339   2
  -1   5 -11-162.837 491.278  24
  -1   5 -11-42.9759 424.619   1
  -1   5 -11 298.447 419.186   3
  -1   5 -11 151.061 286.094   6
  -1   5 -12 458.154 535.745  30
  -1   5 -12 1005.97 411.008   2
  -1   5 -12 1165.85 299.033   6
  -1   5 -12 1397.85 493.887  24
  -1   5 -12 533.802 452.814   1
  -1   5 -13-162.668 482.937  30
  -1   5 -13 224.871 258.352   6
  -1   5 -14 308.848 244.233   6
  -1   5 -14-207.209 444.828  30
  -1   5 -15 471.815 215.808   6
  -1   4  21 143.521 161.644  34
  -1   4  21 125.929 102.262   7
   1  -4 -19 514.189 290.814  30
  -1   4  19-447.952 320.823  34
  -1   4  19 381.095 326.432  29
  -1   4  18 110.115 194.236  14
  -1   4  18 20.1699 389.068  29
   1  -4 -18 131.651 359.151  30
   1  -4 -17 204.790 404.874  30
  -1   4  17 8.94600 227.002  14
  -1   4  16 142.237 259.832  14
  -1   4  16 1203.00 323.486  11
   1  -4 -16 216.887 435.819  30
   1  -4 -15 4429.48 587.594   2
  -1   4  15 3632.78 473.131  14
  -1   4  15 4434.53 512.349  11
   1  -4 -14-203.446 418.756   2
   1  -4 -14 442.060 460.236  30
   1  -4 -13-372.715 427.917  30
   1  -4 -13-357.918 397.621   2
   1  -4 -12-87.7461 347.160   2
  -1   4  12-135.087 288.910  11
   1  -4 -11 1000.42 347.795   2
   1  -4 -10-206.113 335.319   2
   1  -4  -9 1998.12 397.523   2
   1  -4  -8 667.351 356.820   2
   1  -4  -7 6318.27 723.600   2
   1  -4  -6-159.169 228.346   2
  -1   4   5 3642.18 398.919   3
  -1   4   5 4152.31 435.241   5
   1  -4  -5 3626.83 423.941   2
  -1   4   4 1253.30 181.045   3
  -1   4   4 1388.70 220.635   5
   1  -4  -4 1413.69 203.778   2
  -1   4   3 19032.6 2066.10   3
   1  -4  -3 20916.1 2062.55   2
  -1   4   3 20169.6 2071.37   5
  -1   4   2 8957.16 979.454   3
  -1   4   2 9712.18 971.743   4
  -1   4   1 143.527 169.836   3
  -1   4   1 10.7647 79.5360   4
  -1   4   1-58.2601 125.368   1
  -1   4   0 3411.19 430.588   4
  -1   4   0 4859.77 434.033   2
  -1   4   0 4664.64 444.956   1
  -1   4  -1 8447.39 996.479   5
  -1   4  -1 9851.22 989.413   1
  -1   4  -1 9773.94 980.866   2
  -1   4  -2 95.9654 215.921   5
  -1   4  -2 11.9003 153.957   2
  -1   4  -2 48.0486 204.334   3
  -1   4  -2 123.955 177.845   1
  -1   4  -3 1018.32 257.527   1
  -1   4  -3 1111.09 273.663   3
  -1   4  -3 1505.77 240.897   2
  -1   4  -4 3383.52 460.266   3
  -1   4  -4 3096.90 433.083   2
  -1   4  -4 3181.56 452.937   1
  -1   4  -5 5976.02 728.045   2
  -1   4  -5 6877.84 757.722   3
  -1   4  -5 6466.61 744.681   1
  -1   4  -6-164.833 343.839   3
  -1   4  -6 155.425 314.408   2
  -1   4  -6-78.5534 332.767   1
  -1   4  -7 17139.7 1768.25   1
  -1   4  -7 17189.8 1768.50   3
  -1   4  -7 16373.0 1759.72   2
  -1   4  -8 3044.46 467.724   1
  -1   4  -8 3241.68 472.429   3
  -1   4  -8 2915.35 450.699   2
  -1   4  -9 317.846 328.343   2
  -1   4  -9 47.1967 349.094   3
  -1   4  -9 395.862 345.089   1
  -1   4 -10 384.757 393.082   1
  -1   4 -10 186.058 368.649   2
  -1   4 -10 342.007 388.014   3
  -1   4 -10-253.333 455.309  24
  -1   4 -10 705.201 265.894   6
  -1   4 -11 147.482 392.635   2
  -1   4 -11 107.315 266.585   6
  -1   4 -11 135.858 401.464   3
  -1   4 -11 400.435 480.905  24
  -1   4 -11-206.778 424.867   1
  -1   4 -12 448.929 404.974   2
  -1   4 -12-332.073 487.066  24
  -1   4 -12-51.3133 444.121   1
  -1   4 -12-26.1180 282.861   6
  -1   4 -13-198.249 277.812   6
  -1   4 -14-427.068 248.953   6
  -1   4 -15 882.627 234.470   6
  -1   4 -16 162.403 176.559   6
  -1   4 -18-90.1172 214.196  30
  -1   3  21-109.295 87.3162   7
   1  -3 -20-195.542 224.168  30
  -1   3  19-277.589 302.765  34
   1  -3 -18-35.3143 364.061  30
  -1   3  18-165.804 363.175  29
  -1   3  17-353.576 216.220  14
   1  -3 -17 626.548 419.448  30
  -1   3  17 591.102 412.826  29
  -1   3  16 1061.26 274.571  14
  -1   3  16 1276.63 346.675  11
   1  -3 -16 1614.30 476.279  30
  -1   3  15 260.165 319.757  11
   1  -3 -15 905.287 474.474  30
   1  -3 -15-323.186 424.862   2
  -1   3  15-94.5364 260.197  14
   1  -3 -14 8778.21 911.076   2
   1  -3 -14 6315.39 920.918  30
   1  -3 -13 1025.27 463.391  30
   1  -3 -13 383.310 407.830   2
   1  -3 -12 484.391 366.081   2
  -1   3  12 304.190 308.593  11
   1  -3 -11-5.05988 328.482   2
   1  -3 -10 1902.94 382.598   2
   1  -3  -9 133.351 347.421   2
   1  -3  -8 4058.34 554.646   2
   1  -3  -7 11868.7 1253.08   2
   1  -3  -6 25095.4 2574.82   2
   1  -3  -5 52163.1 5321.66   2
   1  -3  -4 21510.4 2203.27   2
   1  -3  -3 58601.2 5972.48   2
   1  -3  -2 11270.9 1137.13   2
  -1   3   2 10789.8 1142.71   3
  -1   3   1 44830.9 4465.18   4
  -1   3   1 40740.6 4470.04   3
  -1   3   0 72964.6 6725.91   1
  -1   3   0 74965.9 6730.03   5
  -1   3   0 56309.1 6723.09   4
  -1   3   0 74293.8 6723.79   2
  -1   3  -1 56341.6 6130.17   5
  -1   3  -1 60196.7 6124.87   2
  -1   3  -1 62589.1 6127.25   1
  -1   3  -2 3265.80 348.717   2
  -1   3  -2 2849.64 359.598   1
  -1   3  -2 2984.93 367.158   3
  -1   3  -2 2967.08 377.132   5
  -1   3  -3 20026.9 2121.36   2
  -1   3  -3 21693.0 2127.00   3
  -1   3  -4 91739.2 9584.92   2
  -1   3  -4 97145.5 9588.42   3
  -1   3  -5 12420.2 1281.45   3
  -1   3  -5 11813.3 1269.25   2
  -1   3  -6 4716.35 618.204   2
  -1   3  -6 5438.22 634.513   3
  -1   3  -7-170.993 319.390   2
  -1   3  -7-199.098 345.128   3
  -1   3  -8 1440.17 349.253   2
  -1   3  -8 1635.58 373.045   3
  -1   3  -9 4074.52 555.824   1
  -1   3  -9 3863.93 548.527   2
  -1   3  -9 4617.23 553.202   3
  -1   3 -10 899.164 425.300  24
  -1   3 -10 124.239 343.744   2
  -1   3 -10 149.611 369.950   1
  -1   3 -10 168.180 344.964   3
  -1   3 -11-12.0261 379.568   2
  -1   3 -11-329.743 447.745  24
  -1   3 -11-38.0529 252.109   6
  -1   3 -11-138.959 400.761   1
  -1   3 -11 501.591 358.966   3
  -1   3 -12 1044.45 418.534   2
  -1   3 -12 1003.80 488.545  24
  -1   3 -12 521.348 429.787   1
  -1   3 -12 508.876 279.367   6
  -1   3 -13-7.47100 427.768   1
  -1   3 -13 310.236 274.706   6
  -1   3 -13-643.837 416.403   2
  -1   3 -13 417.303 534.439  30
  -1   3 -14 14.3934 500.112  30
  -1   3 -14 236.229 246.912   6
  -1   3 -15 1129.04 248.514   6
  -1   3 -15 540.170 488.141  30
  -1   3 -16-252.568 412.955  30
  -1   3 -16-227.653 191.142   6
  -1   3 -17 159.289 343.227  30
  -1   3 -18 394.413 272.933  30
  -1   3 -19 79.0818 166.782  30
   1  -2 -20 187.889 212.591  30
   1  -2 -18 484.854 357.124  30
   1  -2 -17 251.699 418.190  30
   1  -2 -16 304.540 457.376  30
   1  -2 -15 631.047 429.964   2
   1  -2 -15 867.230 443.307   1
  -1   2  15 294.184 333.091  11
  -1   2  15-90.2145 255.256  14
   1  -2 -15 513.493 494.332  30
   1  -2 -14 235.870 432.696   2
   1  -2 -14 178.920 485.216  30
   1  -2 -13 224.833 469.042  30
   1  -2 -13 667.915 418.294   2
   1  -2 -12-194.968 371.937   2
   1  -2 -12 703.208 442.741  30
  -1   2  12-41.3275 293.237  11
   1  -2 -11 221.247 342.951   2
   1  -2 -10 7384.83 842.155   2
   1  -2  -9 10418.2 1132.69   2
   1  -2  -8 2567.18 449.971   2
   1  -2  -7 6142.11 710.104   2
   1  -2  -6 1890.68 300.034   2
   1  -2  -5 1239.07 228.325   2
   1  -2  -4-132.492 187.141   2
   1  -2  -3 124.670 181.521   2
   1  -2  -2 9979.76 1027.47   2
  -1   2   1 30.6582 126.638   5
   1  -2  -1 140.918 66.8573   2
  -1   2   0 861.623 115.381   1
  -1   2   0 678.488 153.856   5
  -1   2   0 722.818 105.108   2
  -1   2  -1 142.435 166.700   5
  -1   2  -1 4.47720 161.428   3
  -1   2  -1 155.486 116.964   2
  -1   2  -1 130.458 147.775   1
  -1   2  -2 43003.8 4366.15   5
  -1   2  -2 43660.0 4361.14   2
  -1   2  -2 41249.3 4364.30   3
  -1   2  -3 6234.00 658.715   3
  -1   2  -3 6028.80 647.853   2
  -1   2  -4 1937.17 279.126   3
  -1   2  -4 1735.84 259.145   2
  -1   2  -5 277.199 235.241   3
  -1   2  -5 47.7145 209.247   2
  -1   2  -6 352.401 293.168   2
  -1   2  -6 310.746 320.959   3
  -1   2  -7-275.619 340.948   2
  -1   2  -7-133.060 360.526   3
  -1   2  -8 4985.15 586.105   3
  -1   2  -8 4094.19 568.498   2
  -1   2  -9 2435.05 406.686   2
  -1   2  -9 2553.05 420.852   3
  -1   2 -10-40.7199 317.619   3
  -1   2 -10-182.792 327.573   2
  -1   2 -11 513.698 347.166   3
  -1   2 -11 974.175 394.604   1
  -1   2 -11 527.205 239.616   6
  -1   2 -11 789.495 380.117   2
  -1   2 -11 85.4574 425.760  24
  -1   2 -12 513.736 432.207   1
  -1   2 -12-236.636 260.768   6
  -1   2 -12-69.0279 443.938  24
  -1   2 -12 298.892 404.675   2
  -1   2 -13 868.462 287.077   6
  -1   2 -13 399.006 530.876  30
  -1   2 -13 1048.07 460.451   1
  -1   2 -13 1645.86 442.187   2
  -1   2 -14 1265.32 552.724  30
  -1   2 -14 1854.63 488.796   1
  -1   2 -14 1740.35 311.092   6
  -1   2 -14 1829.96 462.100   2
  -1   2 -15 204.792 501.586  30
  -1   2 -15-141.920 226.325   6
  -1   2 -16 841.451 457.834  30
  -1   2 -17-770.561 393.439  30
  -1   2 -18 175.172 310.735  30
  -1   2 -19-185.891 228.890  30
   1  -1 -20-44.7333 188.810  30
   1  -1 -18 649.339 355.915  30
   1  -1 -17 1250.26 433.424  30
   1  -1 -16 353.279 463.552  30
  -1   1  15 1308.88 329.508  11
  -1   1  15-22.8301 425.893  29
   1  -1 -15 1284.47 511.475  30
   1  -1 -14 7476.98 848.794   1
   1  -1 -14 6528.30 835.400   2
   1  -1 -14 6185.58 862.900  30
   1  -1 -13-50.4927 490.441  30
   1  -1 -13 470.719 415.663   2
   1  -1 -12 1672.26 486.121  30
   1  -1 -12 2395.34 432.768   2
  -1   1  12 1202.09 349.266  11
   1  -1 -11 381.392 345.648   2
   1  -1 -10 845.594 343.365   2
   1  -1  -9 3067.52 472.594   2
   1  -1  -8 1444.00 391.229   2
   1  -1  -7 1096.55 343.823   2
   1  -1  -6 43552.2 4451.81   2
   1  -1  -5 57983.0 5915.82   2
   1  -1  -4 63284.2 6453.86   2
   1  -1  -3 2733.30 347.234   2
   1  -1  -2 29092.5 2969.22   2
   1  -1  -1 127074. 12940.4   2
  -1   1   0 151504. 15428.4   5
  -1   1  -1 108524. 10831.7   5
  -1   1  -1 104133. 10831.8   3
  -1   1  -2 12349.2 1218.27   5
  -1   1  -2 11356.5 1214.13   3
  -1   1  -3 179.723 183.817   3
  -1   1  -4 68795.0 7013.97   3
  -1   1  -5 1844.31 274.546   3
  -1   1  -6 25622.6 2631.15   3
  -1   1  -7 8998.22 986.609   3
  -1   1  -8 252.554 343.833   3
  -1   1  -9-294.852 315.319   3
  -1   1 -10 211.804 303.554   3
  -1   1 -11 3215.11 466.450   3
  -1   1 -12 618.052 426.101  24
   1  -1  14 1781.54 365.467  11
  -1   1 -14 1817.12 569.702  30
  -1   1 -14 1989.22 480.678   2
  -1   1 -14 2202.00 518.389   1
  -1   1 -15 133.404 514.184  30
   1  -1  16 1242.20 306.231  11
  -1   1 -16 1925.72 497.631  30
  -1   1 -17 215.974 396.316  30
  -1   1 -18 9.04545 346.753  30
  -1   1 -19-223.969 270.004  30
  -1   0  20-30.4126 78.8315   7
  -1   0  18 187.353 273.934  34
   1   0 -18 282.114 333.586  30
   1   0 -17 420.956 399.193  30
   1   0 -16 325.722 442.308  30
   1   0 -15-309.157 481.273  30
  -1   0  15 40.8016 294.221  11
   1   0 -14-21.5192 432.720   2
  -1   0  14-18.5968 419.437  29
   1   0 -14 154.454 521.951  30
   1   0 -14 30.1172 449.601   1
  -1   0  14-588.286 314.169  11
   1   0 -13 8970.02 941.463   1
   1   0 -13 8846.73 931.491   2
  -1   0  12-18.5938 301.587  11
   1   0 -12 69.9600 401.253   2
   1   0 -12-431.360 483.966  30
   1   0 -11 517.158 366.781   2
   1   0 -10 1262.29 366.360   2
   1   0  -9 10377.1 1128.31   2
   1   0  -8-153.220 344.855   2
   1   0  -7 5657.47 683.377   2
   1   0  -6 88.1104 263.200   2
   1   0  -5 316.921 206.784   2
   1   0  -5 152.421 208.352   3
   1   0  -4 557.115 219.249   3
   1   0  -4 786.233 210.376   2
   1   0  -3 1175.66 241.007   2
   1   0  -2 844.291 182.103   2
   1   0  -1 5605.15 578.629   2
   1   0   0 451.634 60.5635   2
   1   0   0 444.626 54.7918   1
  -1   0  -1-7.08821 47.7866   3
  -1   0  -1 3.17550 43.0217   5
   1   0   1 26.1900 38.8333   4
  -1   0  -1-11.0006 47.3291   2
   1   0   2 2378.01 257.551   4
  -1   0  -2 2565.90 258.827   2
  -1   0  -2 2104.31 256.446   3
  -1   0  -3 10751.2 1145.85   3
  -1   0  -3 11546.4 1148.07   2
  -1   0  -4 253.558 175.168   2
  -1   0  -4-32.1078 184.324   3
  -1   0  -5 2808.39 354.049   3
  -1   0  -5 3014.83 348.983   2
  -1   0  -6 2759.74 343.883   3
  -1   0  -6 2341.65 331.887   2
  -1   0  -7-50.5906 287.690   3
  -1   0  -7 216.620 279.527   2
  -1   0  -8 28.9842 330.690   2
  -1   0  -8 13.3139 343.860   3
  -1   0  -9 953.040 324.578   3
  -1   0  -9 557.541 329.964   2
  -1   0 -10-467.185 287.927   3
  -1   0 -10 412.500 314.034   2
  -1   0 -11 1451.11 363.750   2
  -1   0 -12 4528.03 556.616   2
   1   0  12 3317.25 494.812  11
  -1   0 -14 2482.86 586.255  30
  -1   0 -15-33.4464 504.258  30
   1   0  15 792.245 311.694  11
  -1   0 -16 330.101 474.801  30
   1   0  17-23.8651 254.735  11
  -1   0 -17-248.593 421.719  30
  -1   0 -18 283.373 365.831  30
  -1   0 -19-95.9477 298.922  30
  -1   0 -20-80.2283 206.793  30
   1   1 -18 603.042 314.545  30
   1   1 -17 201.742 370.122  30
   1   1 -16 300.569 436.219  30
   1   1 -15 650.540 483.929  30
   1   1 -14 2331.40 570.672  30
   1   1 -14 2677.94 511.560   1
  -1  -1  14 2115.62 379.671  11
   1   1 -13 602.035 523.872  30
   1   1 -13 874.333 465.249   1
   1   1 -12 4749.73 674.460   1
   1   1 -12 4962.07 713.822  30
   1   1 -11 443.311 394.492   1
   1   1 -11 269.111 462.534  30
   1   1 -11 612.778 372.926   2
  -1  -1  11 703.017 284.988  11
   1   1 -10 520.542 341.456   2
   1   1  -9 75.4033 322.627   2
   1   1  -8 10216.7 1111.33   2
   1   1  -7 2664.42 470.231   3
   1   1  -7 2607.04 447.491   2
   1   1  -6 38829.0 4085.56   2
   1   1  -6 40890.2 4084.53   3
   1   1  -5 3794.60 451.630   2
   1   1  -5 3759.01 465.341   3
   1   1  -4 98470.8 10368.2   3
   1   1  -4 105008. 10368.3   2
   1   1  -3 14214.9 1517.53   3
   1   1  -3 15119.3 1516.11   2
   1   1  -2 56804.4 5507.49   2
   1   1  -2 50931.9 5508.36   3
   1   1  -1 2215.42 265.169   1
   1   1  -1 2408.70 262.566   2
   1   1  -1 2267.12 267.989   3
   1   1   0 47835.3 4772.52   2
   1   1   0 45839.3 4772.57   1
  -1  -1  -1 8657.17 938.369   2
   1   1   1 9841.52 938.953   4
  -1  -1  -2 1854.96 201.548   3
  -1  -1  -2 1824.53 209.070   2
   1   1   2 2060.63 208.882   4
  -1  -1  -3 2525.45 318.129   2
  -1  -1  -3 2857.98 302.278   3
   1   1   3 2796.56 323.124   4
  -1  -1  -4 42822.2 4271.68   3
   1   1   4 41086.0 4276.77   4
  -1  -1  -4 41139.6 4274.94   2
  -1  -1  -5 3144.98 371.299   3
  -1  -1  -5 3484.35 381.346   2
  -1  -1  -6 143148. 14759.1   2
  -1  -1  -6 146211. 14757.2   3
  -1  -1  -7 155.379 240.301   2
  -1  -1  -7 213.009 228.834   3
  -1  -1  -8 71556.8 6832.06   3
  -1  -1  -8 61356.2 6835.12   2
  -1  -1  -9-321.755 302.718   3
  -1  -1  -9 39.1369 326.178   2
  -1  -1 -10 3523.89 440.759   3
  -1  -1 -10 3040.90 470.809   2
  -1  -1 -11 34.1024 314.811   2
  -1  -1 -12 952.780 359.411   2
  -1  -1 -13 229.474 385.635   2
  -1  -1 -14 601.186 429.275   2
  -1  -1 -14 547.979 503.770  30
  -1  -1 -15 815.654 499.831  30
  -1  -1 -15 113.411 432.431   2
   1   1  15-217.133 315.039  11
  -1  -1 -16 992.645 485.739  30
   1   1  17 211.152 277.565  11
  -1  -1 -17 1194.49 444.139  30
  -1  -1 -18-554.415 388.806  30
  -1  -1 -19 131.695 323.442  30
   1   1  20-258.342 207.830  34
  -1  -1 -20 306.534 237.632  30
   1   2 -19-105.284 172.846  30
   1   2 -18 265.046 273.664  30
   1   2 -17-170.105 341.959  30
   1   2 -16 84.7292 417.768  30
   1   2 -15 1786.80 499.298  30
   1   2 -14 169.845 236.538   6
   1   2 -14 115.344 493.393  30
   1   2 -13 348.639 527.711  30
   1   2 -13-326.190 437.769   2
  -1  -2  13-215.971 275.155  11
   1   2 -13-60.6137 426.576   1
   1   2 -13-479.153 257.244   6
   1   2 -12 541.715 524.287  30
   1   2 -12 1227.76 294.072   6
   1   2 -12 1414.78 455.820   1
   1   2 -11 113.054 483.506  30
   1   2 -11-57.6758 252.538   6
   1   2 -11-347.069 404.709   1
   1   2 -10 24.1288 354.299   1
   1   2  -9 3351.97 496.745   1
   1   2  -8 244.148 343.080   3
   1   2  -7 23276.4 2412.38   3
   1   2  -6 3395.75 517.139   3
   1   2  -5 18733.5 1941.67   3
   1   2  -4-94.9811 227.965   3
   1   2  -3 3818.27 452.132   3
   1   2  -2 3.34087 228.758   3
   1   2  -2-32.6727 215.092   1
   1   2  -1 1348.07 232.502   1
   1   2  -1 1368.61 245.051   3
   1   2   0 1004.33 156.351   1
   1   2   1 1485.11 155.765   5
   1   2   1 1397.34 163.884   1
  -1  -2  -1 1204.66 154.533   2
  -1  -2  -2-123.267 93.0494   2
   1   2   2-35.7832 55.0743   5
   1   2   3 442.615 156.274   4
  -1  -2  -3 521.852 145.391   2
  -1  -2  -4 22688.3 2360.26   3
  -1  -2  -4 23328.0 2367.74   2
   1   2   4 24458.9 2370.35   4
  -1  -2  -5 173.065 167.345   2
   1   2   5-5.99672 179.053   4
  -1  -2  -5-123.737 127.590   3
  -1  -2  -6 14679.8 1473.80   2
  -1  -2  -6 14039.2 1467.22   3
  -1  -2  -7 3848.76 450.157   2
  -1  -2  -7 3656.79 427.573   3
  -1  -2  -8 2894.51 395.224   3
  -1  -2  -8 2936.12 428.558   2
  -1  -2  -9 1200.34 351.435   2
  -1  -2 -10-19.7467 300.688   2
  -1  -2 -11 5161.50 628.455   2
  -1  -2 -12-121.740 342.136   2
  -1  -2 -13 3949.05 565.936   2
  -1  -2 -14-625.350 495.093  30
  -1  -2 -14 771.404 420.936   2
  -1  -2 -15 1234.80 526.211  30
  -1  -2 -15 1368.22 450.896   2
  -1  -2 -16 450.276 491.521  30
  -1  -2 -17-254.021 433.708  30
   1   2  18 188.405 205.002  14
   1   2  18-100.560 257.189  11
  -1  -2 -19 302.928 334.124  30
  -1  -2 -20-352.218 260.709  30
   1   3 -17 440.429 313.076  30
   1   3 -16 621.054 385.683  30
   1   3 -15-496.244 444.613  30
   1   3 -14 1860.78 511.784  30
   1   3 -14 1089.11 278.780   6
   1   3 -13 981.939 522.571  30
   1   3 -13 1109.93 281.014   6
   1   3 -12 4043.71 497.004   6
   1   3 -12 3887.40 607.050   2
   1   3 -11 66.9153 260.592   6
   1   3 -11 304.179 411.364   2
   1   3 -11 732.154 463.941  24
   1   3 -10 2644.79 507.346  24
   1   3 -10 2081.80 443.669   2
   1   3 -10 2436.38 358.004   6
   1   3  -9-89.6859 328.601   2
   1   3  -8 12336.0 1422.42   2
   1   3  -8 14708.4 1430.73   3
   1   3  -7 1932.56 414.479   3
   1   3  -7 2288.58 405.989   2
   1   3  -6 6273.77 716.522   3
   1   3  -6 5498.58 703.606   2
   1   3  -5 334.991 333.104   2
   1   3  -5 536.078 369.930   3
   1   3  -4 10863.6 1167.18   3
   1   3  -4 11179.8 1159.24   2
   1   3  -3 31561.2 3314.49   3
   1   3  -3 33013.1 3310.67   2
   1   3  -2 54226.8 5434.76   2
   1   3  -2 52072.5 5437.44   3
   1   3  -1 16862.4 1645.90   2
   1   3  -1 14931.2 1649.70   3
   1   3   0 18050.5 1847.54   2
   1   3   1 13086.5 1284.99   3
   1   3   1 12842.0 1280.86   5
   1   3   1 11727.6 1278.73   4
  -1  -3  -2 17201.0 1732.36   2
   1   3   2 17421.4 1733.91   3
   1   3   2 16383.2 1731.46   5
   1   3   3 110274. 11025.5   5
  -1  -3  -3 105403. 11026.8   2
  -1  -3  -4 21941.5 2244.83   2
  -1  -3  -5 54695.0 5577.57   2
  -1  -3  -6 40641.1 4149.64   2
  -1  -3  -7 10568.4 1104.72   2
  -1  -3  -8 24373.2 2509.45   2
  -1  -3  -9 7541.87 849.856   2
  -1  -3 -10 900.895 339.707   2
  -1  -3 -11 7444.93 836.161   2
  -1  -3 -12 218.314 328.586   2
  -1  -3 -13 2085.04 506.304  30
  -1  -3 -13 2309.82 444.620   2
  -1  -3 -14 1293.48 419.526   2
  -1  -3 -14 524.108 475.123  30
  -1  -3 -15 16281.4 1621.34   2
  -1  -3 -15 13741.7 1621.33  30
  -1  -3 -16-133.551 424.983   2
  -1  -3 -16-78.8141 469.136  30
   1   3  16 300.098 328.969  11
  -1  -3 -17 2468.14 512.608  30
   1   3  18 103.074 286.949  11
   1   3  18-53.9514 221.830  14
  -1  -3 -18 222.798 394.977  30
  -1  -3 -19-207.635 346.974  30
  -1  -3 -20 172.535 265.303  30
   1   4 -14 154.730 227.679   6
   1   4 -13 1323.63 295.766   6
   1   4 -12 1000.35 473.955   1
   1   4 -12 798.154 293.741   6
   1   4 -12 508.247 418.115   2
   1   4 -11 131.987 404.706   2
   1   4 -11 405.321 477.387  24
   1   4 -11 149.679 273.316   6
   1   4 -11-631.710 423.644   1
   1   4 -10 288.947 271.670   6
   1   4 -10-245.029 451.624  24
   1   4 -10 171.698 391.942   2
   1   4 -10-339.509 322.172  10
   1   4 -10-651.682 488.631  30
   1   4  -9-245.753 350.009   2
   1   4  -9 345.921 426.512  24
   1   4  -9-142.406 252.426   6
   1   4  -8 167.548 354.328   3
   1   4  -8 178.680 332.266   2
   1   4  -7 2302.93 418.790   3
   1   4  -7 2023.47 389.225   2
   1   4  -6 191.679 363.121   3
   1   4  -6-553.717 332.989   2
   1   4  -5 725.145 386.758   3
   1   4  -5 410.623 346.560   2
   1   4  -4 1781.31 390.238   3
   1   4  -4 1817.44 365.784   2
   1   4  -3 172.126 236.699   2
   1   4  -3 51.7880 271.515   3
   1   4  -2 444.474 196.284   2
   1   4  -2 611.228 240.385   3
   1   4  -1 897.588 195.083   2
   1   4   0 106.766 152.922   2
   1   4   1 6398.92 677.282   5
   1   4   1 6774.08 686.483   3
   1   4   1 6107.49 667.822   4
   1   4   2 17371.6 1821.58   5
  -1  -4  -2 17759.8 1818.35   2
   1   4   2 17555.3 1822.66   4
   1   4   2 18799.5 1826.53   3
   1   4   3 3340.80 362.266   3
   1   4   3 3348.71 372.344   4
  -1  -4  -3 3313.09 357.834   2
   1   4   3 3016.70 360.161   5
  -1  -4  -4 486.327 149.335   2
   1   4   4 430.229 167.918   4
   1   4   4 491.829 146.992   5
   1   4   5 759.336 213.210   4
   1   4   5 1090.40 183.318   5
  -1  -4  -5 1177.47 191.884   2
  -1  -4  -6 982.644 210.300   2
  -1  -4  -7 11287.9 1178.93   2
  -1  -4  -8 2419.89 382.741   2
  -1  -4  -9 1349.56 349.352   2
  -1  -4 -10 291.375 319.292   2
  -1  -4 -11 1491.39 351.460   2
  -1  -4 -12 793.762 328.339   2
  -1  -4 -13-360.891 363.420   2
  -1  -4 -14 1190.85 465.206  30
  -1  -4 -14 1174.41 417.243   2
  -1  -4 -15 867.506 478.518  30
  -1  -4 -15 1517.12 445.354   2
   1   4  16 1322.30 384.456  11
  -1  -4 -16 1587.19 491.877  30
  -1  -4 -16 1607.67 461.329   2
  -1  -4 -17 269.464 432.567  30
   1   4  18 273.730 236.745  14
  -1  -4 -18 315.287 386.429  30
   1   4  18 337.289 299.269  11
  -1  -4 -19 39.6981 333.436  30
  -1  -4 -20-375.981 262.663  30
   1   4  20 30.0427 149.158  14
   1   4  22-2.31942 80.9080   7
   1   5 -14-51.4112 219.193   6
   1   5 -14 568.942 428.315  30
   1   5 -13 53.8218 475.280  30
   1   5 -13 835.155 264.932   6
   1   5 -12 272.814 271.545   6
   1   5 -12-161.855 499.164  30
   1   5 -11 676.748 517.551  30
   1   5 -11 858.042 291.699   6
   1   5 -11 285.505 329.349  10
   1   5 -11 102.772 506.657  24
   1   5 -11-183.645 440.082   1
   1   5 -11 915.037 412.671   2
   1   5 -10 1946.37 563.135  30
   1   5 -10 1499.11 558.680  24
   1   5 -10 2092.73 471.410   2
   1   5 -10 1707.11 411.100  10
   1   5 -10 2414.16 370.220   6
   1   5  -9 629.572 394.755   1
   1   5  -9 479.757 266.653   6
   1   5  -9 202.228 328.081  10
   1   5  -9 159.020 448.309  24
   1   5  -9 58.0408 364.033   2
   1   5  -9 126.346 475.797  30
   1   5  -8 4348.58 643.642  24
   1   5  -8 4788.44 609.156   1
   1   5  -8 5044.55 617.765   3
   1   5  -8 4240.36 590.267   2
   1   5  -7 8998.30 1032.61   1
   1   5  -7 9085.52 1022.96   2
   1   5  -7 10175.9 1042.30   3
   1   5  -6 1382.00 389.477   3
   1   5  -6 1107.45 368.835   1
   1   5  -6 1442.81 344.495   2
   1   5  -5 9596.93 1003.00   3
   1   5  -5 8678.21 985.018   2
   1   5  -5 8805.49 994.466   1
   1   5  -4 41.6183 339.238   2
   1   5  -4 54.1736 336.142   1
   1   5  -4 98.5706 374.308   3
   1   5  -3 4285.72 554.343   2
   1   5  -3 4566.52 573.345   1
   1   5  -3 4659.43 589.229   3
   1   5  -2 211.612 282.581   3
   1   5  -2-162.360 262.596   1
   1   5  -2-226.336 243.434   2
   1   5  -1 11470.4 1134.96   2
   1   5  -1 10165.8 1143.60   1
   1   5   0 12411.4 1257.29   2
   1   5   0 11370.2 1273.46   3
   1   5   0 12514.8 1265.76   1
   1   5   1 2732.99 324.072   4
   1   5   1 2887.48 350.687   5
   1   5   1 2995.32 360.387   3
   1   5   1 2829.01 341.957   1
   1   5   2 279011. 27770.8   1
   1   5   2 275701. 27769.9   4
  -1  -5  -2 262920. 27766.4   2
   1   5   2 281836. 27771.1   3
   1   5   2 279021. 27770.4   5
   1   5   3 5110.35 526.331   3
  -1  -5  -3 4855.63 507.001   2
   1   5   3 4943.15 521.858   4
   1   5   3 4568.09 521.655   5
  -1  -5  -4 131890. 13940.0   2
   1   5   4 138947. 13939.1   3
   1   5   4 136525. 13941.5   5
   1   5   4 141621. 13943.8   4
  -1  -5  -5 5965.76 626.020   2
   1   5   5 5778.14 626.016   5
   1   5   5 5992.68 633.083   4
  -1  -5  -6 9528.11 1007.84   2
   1   5   6 9585.58 1019.98   4
   1   5   6 9884.57 1006.11   5
   1   5   7 13945.0 1612.79   4
  -1  -5  -7 15239.5 1601.72   2
   1   5   7 16734.0 1600.67   5
  -1  -5  -8 865.564 307.827   2
  -1  -5  -9 6393.69 734.269   2
  -1  -5 -10 764.253 323.971   2
  -1  -5 -11 310.568 298.889   2
  -1  -5 -12 4132.78 540.228   2
  -1  -5 -13 632.253 362.079   2
   1   5  14 320.387 258.508  12
  -1  -5 -14 714.130 390.191   2
   1   5  15-155.492 241.364  12
  -1  -5 -15 284.230 409.083   2
   1   5  16-3.75507 347.113  11
  -1  -5 -16 295.855 421.819   2
  -1  -5 -17 1944.67 465.202  30
   1   5  18 287.379 249.465  14
   1   5  18 196.910 318.051  11
   1   5  20-32.8720 168.759  14
   1   5  21 69.3182 123.025  14
   1   6 -16-310.809 241.511  30
   1   6 -15 113.694 316.549  30
   1   6 -14-85.5766 208.855   6
   1   6 -14-687.508 376.378  30
   1   6 -13 1026.77 446.242  30
   1   6 -13 1220.85 271.968   6
   1   6 -12 116.973 468.221  30
   1   6 -12-98.8969 270.808   6
   1   6 -12-342.643 294.426  10
   1   6 -11-1099.64 466.031   1
   1   6 -11-155.344 286.511   6
   1   6 -11 478.791 489.003  30
   1   6 -11 64.4986 488.249  24
   1   6 -11-178.475 332.390  10
   1   6 -11-128.874 389.452   2
   1   6 -10-604.272 397.897   2
   1   6 -10 593.323 512.320  30
   1   6 -10-174.371 445.929   1
   1   6 -10-230.242 350.271  10
   1   6 -10 90.0088 295.339   6
   1   6 -10-299.427 500.550  24
   1   6  -9-430.148 502.450  30
   1   6  -9-92.5209 424.558   1
   1   6  -9 526.234 346.925  10
   1   6  -9 71.1142 376.600   2
   1   6  -9 471.063 493.920  24
   1   6  -9 312.255 288.389   6
   1   6  -8 133.052 462.831  24
   1   6  -8-93.5194 408.895   3
   1   6  -8-165.517 269.859   6
   1   6  -8 78.2863 329.727  10
   1   6  -8-190.760 354.794   2
   1   6  -8-167.119 469.074  30
   1   6  -8 372.337 385.664   1
   1   6  -7-271.234 348.531   1
   1   6  -7 63.5641 363.494   3
   1   6  -7 234.343 316.612   2
   1   6  -6 500.290 292.266   2
   1   6  -6-331.332 356.218   3
   1   6  -6-99.7176 325.619   1
   1   6  -5-4.83519 352.932   3
   1   6  -5-108.840 303.267   2
   1   6  -5-280.604 327.475   1
   1   6  -4 2860.73 465.102   1
   1   6  -4 2847.95 430.614   2
   1   6  -4 2958.81 479.713   3
   1   6  -3 397.751 315.670   2
   1   6  -3 1164.62 366.068   1
   1   6  -3 564.661 386.557   3
   1   6  -2 597.573 315.629   2
   1   6  -2 630.043 356.421   1
   1   6  -1 1675.47 294.707   2
   1   6  -1 1614.97 336.147   1
   1   6   0 482.276 282.151   3
   1   6   0 374.327 179.321   2
   1   6   0 348.569 244.518   1
   1   6   1 8005.47 869.996   4
   1   6   1 8376.87 885.954   5
   1   6   1 8591.25 880.597   1
   1   6   1 8641.40 891.099   3
   1   6   2 68.1824 211.855   3
   1   6   2 126.986 191.779   5
   1   6   2-79.7933 191.210   1
  -1  -6  -2-127.677 94.5220   2
   1   6   2-51.8977 149.708   4
   1   6   3 523.449 201.525   3
   1   6   3 301.271 163.294   4
   1   6   3 398.686 181.671   5
  -1  -6  -3 414.368 96.1242   2
   1   6   4-7.20662 166.677   3
   1   6   4-27.2009 164.686   4
  -1  -6  -4 3.36270 111.962   2
   1   6   4-29.8764 166.132   5
  -1  -6  -5 1203.64 200.886   2
   1   6   5 1272.40 235.897   4
   1   6   5 1301.06 217.359   5
   1   6   6 5841.26 647.535   5
  -1  -6  -6 5923.42 640.674   2
   1   6   6 6228.51 660.247   4
   1   6   7 1069.03 320.302   4
   1   6   7 1341.56 267.139   5
  -1  -6  -7 1122.10 261.923   2
   1   6   8 945.831 361.689   4
  -1  -6  -8 905.969 313.968   2
   1   6   8 1242.82 271.734   5
  -1  -6  -9 307.490 291.231   2
   1   6   9-178.915 267.232   5
   1   6  10-108.882 260.003   5
  -1  -6 -10-149.654 298.723   2
  -1  -6 -11-89.3719 295.887   2
   1   6  11-84.3158 254.627   5
   1   6  12 100.472 262.178   5
  -1  -6 -12-242.866 307.519   2
   1   6  13 220.700 282.835   5
  -1  -6 -13 273.863 345.703   2
   1   6  14 382.549 270.300  12
  -1  -6 -14 539.469 378.123   2
   1   6  15 474.129 279.144  12
  -1  -6 -15 1534.44 419.540   2
   1   6  16 61.6693 268.786  12
  -1  -6 -16 1223.27 416.694   2
   1   6  18 331.409 269.035  14
   1   6  18 1025.72 321.525  11
   1   6  20 107.632 188.204  14
   1   6  21 231.855 142.635  14
   1   7 -16-32.9107 160.464  30
   1   7 -15-42.5735 255.413  30
   1   7 -14-233.734 324.431  30
   1   7 -13 823.129 414.141  30
  -1  -7  13 383.139 355.094  23
   1   7 -12-395.019 434.763  30
   1   7 -12 77.9781 288.977  10
   1   7 -12 324.639 248.826   6
   1   7 -11 222.460 479.560  24
   1   7 -11-24.5767 277.580   6
   1   7 -11-1044.99 462.594  30
   1   7 -11-116.575 311.932  10
   1   7 -10 2442.08 543.225  24
   1   7 -10 1813.35 393.878  10
   1   7 -10 1027.05 532.446  30
   1   7 -10 1739.48 484.515   1
   1   7 -10 688.861 426.236   2
   1   7 -10 2051.54 349.694   6
   1   7  -9 988.348 503.316  24
   1   7  -9-603.301 368.453   2
   1   7  -9-410.905 437.000   1
   1   7  -9-103.214 298.721   6
   1   7  -9-206.832 371.450  10
   1   7  -9 977.071 498.356  30
   1   7  -8 2267.50 355.181   6
   1   7  -8 1932.73 418.450  10
   1   7  -8 2553.42 474.963   1
   1   7  -8 1708.37 524.664  30
   1   7  -8 1299.32 416.791   2
   1   7  -8 1680.84 494.786   3
   1   7  -7 323.693 386.749   1
   1   7  -7 717.595 452.559  30
   1   7  -7 283.110 340.354   2
   1   7  -7 269.165 354.021  10
   1   7  -7 494.991 275.394   6
   1   7  -7 843.551 413.434   3
   1   7  -6 1033.00 375.246   1
   1   7  -6 1254.14 373.008   3
   1   7  -6 569.651 318.762   2
   1   7  -5 2303.25 401.464   1
   1   7  -5 1977.02 420.386   3
   1   7  -5 1973.98 359.702   2
   1   7  -4 3116.29 444.110   2
   1   7  -4 3333.26 496.893   3
   1   7  -4 3321.35 483.948   1
   1   7  -3 14283.5 1451.37   1
   1   7  -3 13277.4 1434.96   2
   1   7  -2 541.997 300.055   2
   1   7  -2 208.686 339.135   1
   1   7  -1-140.785 277.605   2
   1   7  -1 632.412 396.705   3
   1   7  -1 100.435 338.821   1
   1   7   0 834.223 392.136   3
   1   7   0 551.858 311.364   1
   1   7   0 809.155 232.557   2
   1   7   0 651.873 255.408   4
   1   7   1 183.954 214.676   4
   1   7   1 660.668 325.838   3
   1   7   1 197.477 277.983   1
   1   7   2 14494.2 1628.06   3
   1   7   2 17577.8 1614.04   4
  -1  -7  -2 14711.4 1600.95   2
   1   7   2 17644.9 1622.21   1
   1   7   2 15590.6 1626.15   5
   1   7   3 15874.2 1554.21   3
   1   7   3 15308.8 1551.37   5
   1   7   3 16722.2 1545.02   4
  -1  -7  -3 14353.6 1528.20   2
   1   7   4 2874.59 366.574   4
   1   7   4 3131.10 383.103   5
   1   7   4 3118.73 385.859   3
  -1  -7  -4 2895.56 322.465   2
   1   7   5 263.768 204.700   3
  -1  -7  -5 675.438 161.502   2
   1   7   5 433.681 245.484   5
   1   7   5 624.009 234.836   4
   1   7   6 2881.23 383.773   5
   1   7   6 2672.57 402.569   4
  -1  -7  -6 2891.20 358.134   2
   1   7   7 669.775 271.817   5
  -1  -7  -7 1315.35 260.495   2
   1   7   7 673.104 326.559   4
  -1  -7  -8 178.196 272.429   2
   1   7   8 282.953 264.479   5
   1   7   8-29.2160 316.512   4
   1   7   9 82.2604 242.682   5
  -1  -7  -9-93.0321 273.980   2
  -1  -7 -10 664.048 293.627   2
   1   7  10 940.537 260.549   5
   1   7  11 242.256 244.311   5
  -1  -7 -11 492.427 284.109   2
  -1  -7 -12 3770.06 509.231   2
   1   7  12 3898.32 482.531   5
   1   7  13 1113.38 317.455  12
   1   7  13 2557.24 344.984   5
  -1  -7 -13 2571.51 388.533   2
   1   7  13 1038.37 439.076  29
   1   7  14 1505.43 351.152  12
  -1  -7 -14 2352.82 421.771   2
   1   7  15-128.359 284.667  12
  -1  -7 -15 5.97102 395.932   2
   1   7  15 417.601 337.576  11
  -1  -7 -16 488.451 406.477   2
   1   7  16-110.600 284.890  12
   1   7  17 1321.55 326.542  14
   1   7  18-54.0893 266.204  14
   1   7  20-25.4755 195.466  14
   1   7  21-13.9868 149.401   7
   1   7  21 40.8973 151.144  14
   1   7  22 134.059 112.287   7
   1   7  22 234.529 98.9360  14
   1   8 -15-22.9019 174.452  30
   1   8 -14-57.9766 263.031  30
  -1  -8  13 477.198 284.657  23
   1   8 -13 415.528 204.861   6
   1   8 -13 307.835 333.216  30
   1   8 -12 37.8764 237.830   6
   1   8 -12-161.769 254.397  10
   1   8 -12 351.039 387.230  30
   1   8 -11 695.775 437.335  30
   1   8 -11 375.210 468.382  24
   1   8 -11 348.741 273.015   6
   1   8 -11 466.740 310.139  10
   1   8 -10 441.941 294.958   6
   1   8 -10-183.926 453.494  30
   1   8 -10 402.294 499.370  24
   1   8 -10-110.012 338.471  10
   1   8  -9-221.024 373.969  10
   1   8  -9-128.423 300.079   6
   1   8  -9 660.466 482.463  30
   1   8  -9 550.781 435.198   1
   1   8  -8 562.077 503.860  30
   1   8  -8 1561.09 344.187   6
   1   8  -8 1572.65 477.480   1
   1   8  -8 1980.34 409.068  10
   1   8  -8 1372.32 390.456   2
   1   8  -7 1203.13 436.824   1
   1   8  -7 1707.82 313.699   6
   1   8  -7 921.863 360.489   2
   1   8  -7 729.470 447.102   3
   1   8  -7 1092.45 383.688  10
   1   8  -7-65.2110 474.239  30
   1   8  -6 191.048 363.496  21
   1   8  -6 477.132 348.166  10
   1   8  -6-7.42279 448.776  24
   1   8  -6 621.628 419.964   3
   1   8  -6-271.818 426.070  30
   1   8  -6-289.217 304.626  15
   1   8  -6 159.662 387.683   1
   1   8  -6 153.514 318.626   2
   1   8  -5 736.337 315.530  10
   1   8  -5 933.559 399.902   3
   1   8  -5 805.052 375.462   1
   1   8  -5 955.243 267.343   6
   1   8  -5 933.327 304.049   2
   1   8  -4-191.596 353.182   3
   1   8  -4-64.7808 262.599   2
   1   8  -4 99.1435 325.100   1
   1   8  -3 232.697 310.623   1
   1   8  -3 227.062 257.480   2
   1   8  -2-59.8941 252.451   2
   1   8  -2 387.644 359.462   3
   1   8  -2 134.948 319.800   1
   1   8  -1 413.541 318.786   1
   1   8  -1 112.391 238.980   2
   1   8  -1 525.541 365.499   3
   1   8   0 400.184 251.569   4
   1   8   0 806.537 381.790   3
   1   8   0 403.093 323.325   1
   1   8   1 357.322 247.863   4
   1   8   1 583.573 311.984   1
   1   8   1 567.879 378.262   3
   1   8   2 290.455 364.079   3
   1   8   2-106.508 348.430   5
   1   8   2 196.906 248.556   4
   1   8   2 18.9764 320.343   1
   1   8   3 323.813 345.576   3
   1   8   3 273.196 245.629   4
   1   8   3 360.122 319.779   5
   1   8   4 649.964 308.109   5
   1   8   4 361.724 254.988   4
   1   8   4 425.185 314.846   3
   1   8   5 1171.99 310.519   5
   1   8   5 1451.47 314.758   4
   1   8   6 140.612 275.185   5
   1   8   6-30.8624 284.189   4
   1   8   7 204.813 312.816   4
   1   8   7 121.521 264.679   5
   1   8   8 425.476 325.406   4
   1   8   8 43.7557 261.997   5
  -1  -8  -9 1536.60 303.538   2
   1   8   9 1760.96 310.582   5
  -1  -8 -10 75.6259 258.561   2
   1   8  10 165.203 243.613   5
   1   8  11 322.305 244.817   5
  -1  -8 -11 714.359 281.689   2
   1   8  12 428.198 254.654   5
  -1  -8 -12 450.174 293.009   2
  -1  -8 -13 179.561 325.837   2
   1   8  13 591.139 265.587  12
   1   8  14-17.4151 321.511  11
   1   8  14 358.850 271.678  12
   1   8  14 402.131 421.004  29
   1   8  15-299.534 307.009  12
   1   8  16 364.852 316.209  14
   1   8  16-231.728 276.019  12
   1   8  17 65.1864 331.451  11
   1   8  17-69.4550 288.596  14
   1   8  18-37.2432 294.953  11
   1   8  19-130.939 240.605  14
   1   8  20 273.235 205.288  14
   1   8  21-166.797 160.407  14
   1   8  21-38.2992 149.986   7
   1   8  22 213.021 112.778   7
   1   8  22 4.13636 110.223  14
   1   9 -14-68.5200 172.282  30
  -1  -9  13-20.7489 242.347  23
   1   9 -13 560.369 260.916  30
   1   9 -12 810.359 217.722   6
   1   9 -12 454.809 233.306  10
   1   9 -11 26.6086 377.262  30
   1   9 -11 800.394 290.040  10
   1   9 -11 695.885 250.778   6
   1   9 -10 105.806 410.919  30
   1   9 -10 170.004 270.736   6
   1   9 -10 72.0539 327.825  10
   1   9  -9 105.133 447.509  30
   1   9  -9 509.666 293.668   6
   1   9  -9 412.313 356.334  10
   1   9  -8 3029.58 661.408  30
   1   9  -8 5196.55 566.649   6
   1   9  -8 4116.14 661.855   1
   1   9  -8 4998.54 612.605  10
   1   9  -7 5020.48 832.441  30
   1   9  -7 7742.24 841.004   1
   1   9  -7 5906.08 797.826  21
   1   9  -7 7897.97 798.186  10
   1   9  -7 7013.03 867.426  24
   1   9  -6 5367.90 1011.36  30
   1   9  -6 11350.5 1036.22   3
   1   9  -6 12360.1 1022.76   1
   1   9  -6 7333.14 1003.32  21
   1   9  -6 7481.13 1040.16  24
   1   9  -6 9433.55 978.881  10
   1   9  -5 4509.02 635.251   3
   1   9  -5 4972.59 544.819   6
   1   9  -5 5362.66 622.547   1
   1   9  -5 3826.01 644.438  24
   1   9  -5 4114.42 583.901  10
   1   9  -5 3659.98 618.193  21
   1   9  -4 129.701 342.627  21
   1   9  -4 101.850 391.658  24
   1   9  -4 513.034 258.186   6
   1   9  -4 693.576 361.170   1
   1   9  -4 467.874 310.433  10
   1   9  -3 1279.81 352.101   1
   1   9  -2 64.4980 229.896   4
   1   9  -2 425.947 349.962   3
   1   9  -2-77.3692 302.929   1
   1   9  -1 8315.94 932.267   3
   1   9  -1 7499.52 879.891   4
   1   9  -1 9619.82 911.736   1
   1   9   0 820.477 304.343   1
   1   9   0 123.504 364.063   3
   1   9   0 681.466 242.237   4
   1   9   1 14261.2 1518.53   3
   1   9   1 13406.3 1483.41   4
   1   9   1 15834.9 1502.20   1
   1   9   2 1936.08 363.615   1
   1   9   2 1909.51 312.098   4
   1   9   2 1488.48 412.331   3
   1   9   3-43.5280 349.171   5
   1   9   3-51.9621 234.054   4
   1   9   3 25.1066 357.974   3
   1   9   4 1536.61 367.297   5
   1   9   4 1523.25 292.909   4
   1   9   4 1241.41 366.866   3
   1   9   5 12672.8 1384.69   3
   1   9   5 13441.7 1390.50   5
   1   9   5 13508.3 1380.97   4
   1   9   6 2901.47 420.687   5
   1   9   6 2979.62 414.812   4
   1   9   7 9401.66 1013.33   5
   1   9   7 9514.70 1022.00   4
   1   9   8 4828.88 537.471   5
   1   9   8 4055.90 559.294   4
   1   9   9 114.137 239.942   5
   1   9  10 4948.88 572.827   5
   1   9  11 1449.13 291.570   5
   1   9  12 2165.29 356.011  12
   1   9  13 436.385 303.551  12
   1   9  14 1915.07 533.717  29
   1   9  14 3314.41 421.828  12
   1   9  15 1008.51 325.458  14
   1   9  15 96.6886 294.528  12
   1   9  16 3695.26 449.916  14
   1   9  16 2351.88 448.382  12
   1   9  17 288.234 306.706  11
   1   9  19-163.936 243.831  14
   1   9  19 768.034 397.634  34
   1   9  20 258.273 205.554  14
   1   9  20 218.798 179.135   7
   1   9  21 269.141 149.991   7
   1   9  21 177.425 164.742  14
   1   9  22 68.9212 110.267   7
   1   9  22-61.6765 117.854  14
   1  10 -12 206.492 243.993  30
   1  10 -12-197.547 183.071  10
   1  10 -12 306.230 177.571   6
  -1 -10  12 116.080 258.420  23
   1  10 -11 175.370 245.961  10
   1  10 -11 495.512 219.880   6
   1  10 -11 54.7989 310.415  30
   1  10 -10 67.2280 351.640  30
   1  10 -10-461.634 244.957   6
   1  10 -10 175.762 298.003  10
   1  10  -9 582.581 341.667  10
   1  10  -9 581.933 277.635   6
   1  10  -8 44.4934 416.301  30
   1  10  -8-62.5213 373.820  10
   1  10  -8-362.310 499.209  24
   1  10  -7 2518.08 486.988   1
   1  10  -7 1833.26 550.974  24
   1  10  -7 3210.18 456.415  10
   1  10  -7 1891.26 460.443  21
   1  10  -6-268.377 395.018  10
   1  10  -6 530.901 410.660   1
   1  10  -6 1463.77 520.985  24
   1  10  -6 22.0966 424.239  30
   1  10  -6 771.033 310.479   6
   1  10  -6 414.849 421.620  21
   1  10  -6 1083.49 487.664   3
   1  10  -5-31.7980 484.109  24
   1  10  -5 340.453 297.039   6
   1  10  -5 284.678 377.909  10
   1  10  -5-236.364 395.805   1
   1  10  -5 382.211 426.887  21
   1  10  -4 590.068 280.843   6
   1  10  -4 387.100 385.489  21
   1  10  -4 855.122 436.432  24
   1  10  -4 268.884 342.847  10
   1  10  -4 463.703 374.775   1
   1  10  -3 582.044 271.279   6
   1  10  -3 201.581 425.061   3
   1  10  -3 947.000 332.830  10
   1  10  -3 577.880 365.760   1
   1  10  -3 1196.01 384.533  21
   1  10  -3 387.989 401.046  24
   1  10  -2-121.319 318.707   1
   1  10  -2-102.324 394.207   3
   1  10  -1 260.023 359.438   3
   1  10  -1-164.941 308.411   1
   1  10   0 259.117 357.867   3
   1  10   0-38.1972 217.491   4
   1  10   0 223.739 295.003   1
   1  10   1 872.583 223.081   4
   1  10   1-36.9390 353.285   3
   1  10   1 562.243 305.889   1
   1  10   2 398.973 213.623   4
   1  10   2-195.759 345.564   3
   1  10   3 428.947 227.554   4
   1  10   3 720.501 340.337   3
   1  10   4 1047.59 350.016   3
   1  10   4 1290.65 346.071   5
   1  10   4 1049.99 250.388   4
   1  10   5 6931.23 864.291   3
   1  10   5 9001.24 856.760   4
   1  10   5 7619.59 873.641   5
   1  10   6 1327.73 312.244   5
   1  10   6 981.457 286.418   4
   1  10   7 6100.61 682.576   4
   1  10   7 5879.87 677.050   5
   1  10   8 3689.52 463.655   5
   1  10   8 3533.34 478.826   4
   1  10   9 1592.63 305.747   5
   1  10  10 4435.72 528.166   5
   1  10  12 1778.21 326.272  14
   1  10  12 1567.07 263.421   7
   1  10  13 1367.97 361.266  12
   1  10  13 2194.44 354.328  14
   1  10  14 726.628 336.690  12
   1  10  15 590.404 333.575  12
   1  10  15 1422.17 338.174  11
   1  10  16 668.508 316.228  12
   1  10  16 630.173 327.487  11
   1  10  17-303.786 227.569   7
   1  10  17 213.083 293.841  14
   1  10  18 885.547 223.825   7
   1  10  18 383.332 272.581  14
   1  10  18-94.9164 428.413  34
   1  10  19 481.082 200.522   7
   1  10  19 268.557 245.260  14
   1  10  20 46.9815 203.551  14
   1  10  20 148.980 172.488   7
   1  10  21 85.4919 167.078  14
   1  10  21 116.638 144.692   7
   1  10  21 229.415 166.188  19
   1  10  22 18.7439 207.017  29
   1  10  22-16.1245 104.819   7
   1  10  22 64.5005 119.176  14
   1  10  22-30.2443 191.477  34
  -1 -11  12-125.388 208.509  23
   1  11 -11-26.6914 182.500   6
   1  11 -11 256.272 207.453  10
   1  11 -10 18.0256 258.415  10
   1  11 -10 325.423 275.881  30
   1  11 -10 239.666 215.615   6
   1  11  -9 568.944 401.980  24
   1  11  -9-345.550 321.786  30
   1  11  -9-44.9622 313.383  10
   1  11  -8-52.1219 347.232  10
   1  11  -8 48.3184 350.440  30
   1  11  -8-157.058 460.585  24
   1  11  -7 142.113 369.674  21
   1  11  -7 14.2372 382.085  10
   1  11  -7 41.4932 484.484  24
   1  11  -7 85.2694 291.618   6
   1  11  -6 3966.74 659.892  24
   1  11  -6 3900.24 561.168  10
   1  11  -6 2925.27 575.494  21
   1  11  -6 4419.90 508.812   6
   1  11  -5 743.228 426.817   1
   1  11  -5 1648.53 423.551  10
   1  11  -5 962.058 334.885   6
   1  11  -5 1343.04 438.410  21
   1  11  -5 1138.77 515.544  24
   1  11  -4 8418.52 977.547   3
   1  11  -4 7740.91 954.590  21
   1  11  -4 8409.23 917.463  10
   1  11  -4 7668.85 939.898   1
   1  11  -4 8467.18 885.251   6
   1  11  -4 7248.70 971.679  24
   1  11  -3 297.337 367.764   1
   1  11  -3 310.195 354.627  10
   1  11  -3 622.033 452.389  24
   1  11  -3-63.2331 456.779   3
   1  11  -3 372.215 425.722  21
   1  11  -3 340.161 276.256   6
   1  11  -2 160.991 350.981   1
   1  11  -2-146.863 425.188  21
   1  11  -2 220.958 256.928   6
   1  11  -2-3.49082 412.799  24
   1  11  -2 607.716 439.167   3
   1  11  -1 414.219 348.598   1
   1  11  -1 1091.98 372.291  24
   1  11  -1 913.121 403.525   3
   1  11  -1 758.876 423.335  21
   1  11   0 363.441 386.641  21
   1  11   0 1110.64 327.983   1
   1  11   0 561.744 401.565   3
   1  11   1 10372.7 1239.06   3
   1  11   1 12332.9 1225.57   1
   1  11   2 1135.73 377.567   3
   1  11   3 861.738 337.684   3
   1  11   4 1580.01 362.323   3
   1  11   5 358.038 288.607   3
   1  11   5 488.151 316.162   5
   1  11   5 535.596 235.572   4
   1  11   6 2891.59 390.451   4
   1  11   6 2858.76 426.205   5
   1  11   7 7756.33 897.684   4
   1  11   7 8864.19 904.805   5
   1  11   8 164.485 268.299   5
   1  11   8-265.916 277.104   4
   1  11   9 8986.49 966.462   5
   1  11  11 13609.8 1483.57  14
   1  11  11 15082.4 1493.70  12
   1  11  12 532.893 189.859   8
   1  11  12 807.385 300.322  12
   1  11  12 133.266 277.560  14
   1  11  12 910.656 429.962  29
   1  11  12-229.975 381.721  34
   1  11  12 891.182 207.582   7
   1  11  13 873.592 401.660  34
   1  11  13 208.494 299.057  14
   1  11  13 615.859 216.859   7
   1  11  14 319.719 227.569   7
   1  11  14 901.883 345.635  12
   1  11  14 626.388 313.620  14
   1  11  14 456.315 425.833  34
   1  11  15 1146.97 326.483  12
   1  11  15 869.798 235.761   7
   1  11  16 2394.91 385.405  12
   1  11  16 1947.00 303.411   7
   1  11  17 95.5983 424.047  34
   1  11  17 88.1102 213.572   7
   1  11  18 633.542 269.944  14
   1  11  18 585.803 214.296   7
   1  11  19 249.199 186.587   7
   1  11  19 135.639 233.795  14
   1  11  20 358.062 164.749   7
   1  11  20 53.6027 203.832  14
   1  11  21 236.266 160.872  14
   1  11  21-185.890 175.405  19
   1  11  21-79.0699 134.122   7
   1  11  22 144.595 174.181  34
   1  11  22 100.770 118.049  14
  -1 -12  11-100.715 218.525  23
   1  12 -10 174.316 217.317  10
   1  12  -9-123.128 355.372  24
   1  12  -9 177.516 263.865  10
   1  12  -8 295.786 243.433   6
   1  12  -8-124.418 312.457  10
   1  12  -8 65.3523 404.754  24
   1  12  -7 766.698 372.440  10
   1  12  -7 1136.10 466.745  24
   1  12  -7 961.650 279.657   6
   1  12  -6-267.226 377.507  21
   1  12  -6 796.398 284.689   6
   1  12  -6-345.964 386.760  10
   1  12  -6 644.208 474.158  24
   1  12  -5 289.469 509.590  24
   1  12  -5 216.355 287.279   6
   1  12  -5 284.476 386.858  10
   1  12  -5 127.224 440.626  21
   1  12  -4 323.687 492.681  24
   1  12  -4 420.563 475.054   3
   1  12  -4 53.7107 386.463  10
   1  12  -4 400.342 303.239   6
   1  12  -4 904.414 452.672  21
   1  12  -3 1266.40 477.331   3
   1  12  -3 817.439 480.989  24
   1  12  -3 747.116 395.387   1
   1  12  -3-90.9324 473.475  21
   1  12  -3 335.029 384.530  10
   1  12  -3 760.961 298.678   6
   1  12  -2-491.520 434.080  21
   1  12  -2 272.894 277.068   6
   1  12  -2 95.4361 366.182   1
   1  12  -2 299.565 455.357   3
   1  12  -2-41.5568 448.065  24
   1  12  -1 67.2868 432.366   3
   1  12  -1-202.028 439.028  21
   1  12  -1 5.65438 361.647   1
   1  12  -1-572.913 410.220  24
   1  12  -1 167.229 263.890   6
   1  12   0 693.403 254.304   6
   1  12   0-58.8951 324.770  10
   1  12   0 217.236 344.569   1
   1  12   0 138.232 391.159   3
   1  12   0-136.161 421.047  21
   1  12   0 239.586 379.821  24
   1  12   1 806.943 365.176  24
   1  12   1 946.638 422.129   3
   1  12   1 1339.76 339.349  10
   1  12   2 3831.96 529.611   3
   1  12   2 3335.33 567.521  21
   1  12   2 3340.32 469.441  10
   1  12   3 1912.86 405.488   3
   1  12   4 955.756 344.822   3
   1  12   6-4.56475 318.837   5
   1  12   7 352.219 315.590   5
   1  12   8 708.392 308.015   5
   1  12  10 155.384 248.201  14
   1  12  10 866.751 303.745  12
   1  12  11 136.078 185.472   7
   1  12  11 207.517 254.736  14
   1  12  11 26.9436 184.658   8
   1  12  11 446.113 324.026  12
   1  12  12 182.962 269.474  14
   1  12  12 153.039 195.553   7
   1  12  12-202.242 187.747   8
   1  12  12-188.328 314.041  12
   1  12  12 123.421 454.079  29
   1  12  13 1340.03 303.551  14
   1  12  13 552.845 357.578  12
   1  12  13 683.006 226.235   7
   1  12  14 83.3599 211.053   7
   1  12  14 450.217 294.442  14
   1  12  15 1604.12 337.419  14
   1  12  15 1415.49 347.506  12
   1  12  15 1458.90 267.228   7
   1  12  16 572.491 217.532   7
   1  12  16 446.508 284.106  14
   1  12  17 523.650 214.516   7
   1  12  18-202.189 194.556   7
   1  12  19 744.785 193.359   7
   1  12  20-396.141 192.103  14
   1  12  20-63.8354 154.550   7
   1  12  21 255.704 155.118  14
   1  12  21 85.7819 175.002  19
   1  12  21 170.221 125.379   7
   1  12  21-107.547 236.262  34
   1  12  22-296.922 148.062  34
   1  12  22 62.8882 110.431  14
  -1 -13  10-76.3110 228.821  23
   1  13 -10-146.344 156.852  10
   1  13  -9 119.218 175.302   6
   1  13  -9 512.534 218.061  10
   1  13  -8-167.496 341.978  24
   1  13  -8-309.025 272.293  10
   1  13  -8 172.190 201.182   6
   1  13  -7-47.8198 309.442  10
   1  13  -7 271.196 236.081   6
   1  13  -7 213.451 398.476  24
   1  13  -6 462.878 349.998  10
   1  13  -6 65.9389 445.488  24
   1  13  -6 296.298 255.747   6
   1  13  -5 108.458 418.887  21
   1  13  -5 281.210 473.841  24
   1  13  -5 91.9301 267.542   6
   1  13  -5 402.840 370.765  10
   1  13  -4 3419.10 628.809  21
   1  13  -4 4154.55 510.208   6
   1  13  -4 4748.46 571.360  10
   1  13  -4 3393.95 640.849  24
   1  13  -3 125.202 286.691   6
   1  13  -3-144.799 386.697  10
   1  13  -3-458.483 462.784  21
   1  13  -3-229.345 482.618  24
   1  13  -2 1914.10 540.786   3
   1  13  -2 2123.60 549.138  21
   1  13  -2 1941.20 523.600  24
   1  13  -2 2478.81 367.083   6
   1  13  -1 970.348 461.417   3
   1  13  -1-186.458 464.081  21
   1  13  -1 623.560 285.749   6
   1  13  -1 917.843 449.224  24
   1  13   0 527.032 493.402  21
   1  13   0 51.7124 358.215  10
   1  13   0 229.961 445.154   3
   1  13   0 111.950 414.559  24
   1  13   0 28.4826 263.265   6
   1  13   1 9141.78 967.201   3
   1  13   1 8637.74 950.036  24
   1  13   1 7571.78 920.192  10
   1  13   2 639.837 478.787  21
   1  13   2 940.233 340.516  10
   1  13   2 817.551 401.972   3
   1  13   2 273.890 367.208  24
   1  13   3 23229.7 2614.62   3
   1  13   3 25262.9 2589.96  10
   1  13   3 25459.9 2597.49  24
   1  13   3 26679.6 2623.70  21
   1  13   4 2662.88 397.400  10
   1  13   4 2268.33 409.655  24
   1  13   4 2605.09 519.519  21
   1  13   4 2174.39 415.475  31
   1  13   5 6257.86 713.106  31
   1  13   5 6219.44 700.318  10
   1  13   5 5926.13 770.585  21
   1  13   6 4169.92 634.443  21
   1  13   6 4562.24 556.766  31
   1  13   7 9883.28 1153.35  26
   1  13   7 11754.7 1140.07   5
   1  13   7 9851.40 1118.48  31
   1  13   9 4809.48 543.540  14
   1  13   9 4846.52 578.828  12
   1  13  10 846.197 214.270   8
   1  13  10 1186.61 312.946  12
   1  13  10 924.738 255.742  14
   1  13  11 5824.08 654.962  12
   1  13  11 5198.30 614.270  14
   1  13  11 5172.46 738.177  29
   1  13  12 1168.56 314.625  14
   1  13  12 2144.08 367.007  12
   1  13  13 6921.39 746.590  14
   1  13  13 7865.36 784.835  12
   1  13  13 6203.06 717.047   7
   1  13  14 164.888 202.996   7
   1  13  14 67.5089 313.185  12
   1  13  14 11.4038 279.465  14
   1  13  15-168.370 481.491  29
   1  13  15 461.880 277.847  14
   1  13  15 119.456 203.678   7
   1  13  16 568.175 211.292   7
   1  13  16 582.943 282.484  14
   1  13  17-133.573 190.356   7
   1  13  17 211.492 261.821  14
   1  13  18 66.1798 177.194   7
   1  13  19 3.17900 289.187  34
   1  13  19 82.4905 160.626   7
   1  13  20 139.230 249.514  34
   1  13  21-86.4889 145.157  14
   1  13  21 144.886 188.187  34
   1  13  21-24.2059 169.496  19
   1  13  22-129.460 99.9689  14
   1  14  -9 87.8783 150.272  10
   1  14  -9 51.0743 201.223  26
  -1 -14   9 90.2367 222.136  23
   1  14  -8-312.927 215.995  10
   1  14  -8 39.7982 160.927   6
   1  14  -7-223.745 189.266   6
   1  14  -7 317.545 333.644  24
   1  14  -7 303.990 262.531  10
   1  14  -6 302.543 310.505  10
   1  14  -6-358.196 378.317  24
   1  14  -6 25.8812 212.350   6
   1  14  -5 2392.38 395.672  10
   1  14  -5 1789.69 304.462   6
   1  14  -5 1127.92 460.320  24
   1  14  -4 190.478 374.543  10
   1  14  -4 79.5837 254.220   6
   1  14  -4 55.4787 438.942  24
   1  14  -3-888.720 463.041  24
   1  14  -3-588.233 434.016  21
   1  14  -3 47.5737 257.785   6
   1  14  -2 128.490 460.179  24
   1  14  -2 120.842 261.802   6
   1  14  -2-47.2375 453.486  21
   1  14  -1 853.767 489.742  21
   1  14  -1 443.448 453.049  24
   1  14  -1 379.643 264.109   6
   1  14   0-366.244 256.223   6
   1  14   0-123.601 475.798  21
   1  14   0 233.088 431.992  24
   1  14   0 203.454 384.412  10
   1  14   1-365.801 427.264  24
   1  14   1 291.214 417.234   3
   1  14   1 221.831 373.827  10
   1  14   2 787.404 356.248  10
   1  14   2 55.4466 406.140  24
   1  14   2-4.88253 513.006  21
   1  14   3 531.482 481.995  21
   1  14   3 151.322 350.233  31
   1  14   3 884.881 384.398  24
   1  14   3 535.650 343.053  10
   1  14   4 102.717 492.680  21
   1  14   4 829.713 359.393  24
   1  14   4-319.475 333.047  10
   1  14   5 387.709 320.962  10
   1  14   5 394.004 473.889  21
   1  14   5 99.4472 333.201  31
   1  14   6 555.083 451.559  21
   1  14   6 427.995 327.415  31
   1  14   6 985.848 306.463  10
   1  14   7 2543.32 523.938  26
   1  14   8 3210.91 547.865  26
   1  14  10 1925.07 316.043  14
   1  14  10 2130.77 291.390   8
   1  14  11 187.904 241.551  14
   1  14  11 77.3659 471.527  29
   1  14  12 65.2372 252.457  14
   1  14  13 249.371 260.435  14
   1  14  14 292.639 264.002  14
   1  14  15 516.847 265.569  14
   1  14  16 399.253 261.504  14
   1  14  16 394.338 323.056  34
   1  14  17 404.830 239.172  14
   1  14  17-309.813 310.585  34
   1  14  18-32.6583 223.596  14
   1  14  18-3.03892 288.329  34
   1  14  19 32.9594 253.764  34
   1  14  19 292.995 201.598  14
   1  14  20-164.883 206.491  34
   1  14  21 313.486 160.332  19
   1  15  -8 40.0657 190.838  26
   1  15  -8 44.7944 160.209  31
   1  15  -8-168.513 139.125  10
   1  15  -7 441.913 211.309  10
   1  15  -6 665.906 190.184   6
   1  15  -6 946.536 262.077  10
   1  15  -6 681.475 318.777  24
   1  15  -5 579.955 363.926  24
   1  15  -5 658.252 290.014  10
   1  15  -5 288.465 196.648   6
   1  15  -4-153.472 210.689   6
   1  15  -4 296.070 331.649  10
   1  15  -4 411.064 390.682  24
   1  15  -3 170.272 228.971   6
   1  15  -3-652.060 428.060  24
   1  15  -2 249.002 234.846   6
   1  15  -2 276.658 432.201  24
   1  15  -1 105.233 233.387   6
   1  15  -1 14.7218 443.055  24
   1  15  -1-572.331 475.746  21
   1  15   0 4573.80 594.159  10
   1  15   0 4413.63 679.259  21
   1  15   0 4014.15 635.375  24
   1  15   1 272.979 430.621  24
   1  15   1 754.979 382.692  10
   1  15   1 503.071 377.626  31
   1  15   2 1035.52 487.453  21
   1  15   2 886.636 377.135  10
   1  15   2 937.839 369.561  31
   1  15   2 1070.78 429.424  24
   1  15   3 2027.22 400.405  10
   1  15   3 1493.28 435.209  24
   1  15   3 1755.86 545.391  21
   1  15   4 755.657 352.736  31
   1  15   4 428.582 517.588  21
   1  15   4 1036.68 388.591  24
   1  15   4 673.196 358.191  10
   1  15   5 12016.1 1094.40  10
   1  15   5 8050.00 1099.75  31
   1  15   6 1037.94 355.298  31
   1  15   6 1067.98 504.022  26
   1  15   6 1084.11 347.256  10
   1  15   7 4852.17 695.317  26
   1  15   8 397.274 438.280  26
   1  15  10 606.277 452.842  29
   1  15  11 28.4644 227.224  14
   1  15  12 293.070 241.001  14
   1  15  13 501.369 255.291  14
   1  15  14-179.447 244.300  14
   1  15  14-856.285 457.536  29
   1  15  15 575.250 255.077  14
   1  15  16 837.651 252.435  14
   1  15  17 1517.25 275.659  14
   1  15  18 74.6949 202.178  14
   1  15  19 144.297 183.764  14
   1  15  20 229.509 156.398  14
   1  15  20 483.357 190.330  19
   1  15  21 27.9946 133.536  19
   1  15  21-10.7938 112.166  14
  -1 -16   7 18.9138 174.592  23
   1  16  -6 208.970 192.438  31
   1  16  -6 39.0611 253.996  26
   1  16  -6 254.178 189.249  10
   1  16  -5 273.769 265.853  24
   1  16  -5 583.510 233.147  10
   1  16  -5-2.64042 237.406  31
   1  16  -4 54.1307 273.142  31
   1  16  -4-71.7596 270.552  10
   1  16  -4-332.093 321.620  24
   1  16  -4-126.083 164.434   6
   1  16  -3 525.205 182.298   6
   1  16  -3 71.4283 358.429  24
   1  16  -2 217.817 190.553   6
   1  16  -2 94.0315 391.619  24
   1  16  -2 488.166 315.674  31
   1  16  -1-119.710 414.306  24
   1  16  -1-76.9055 339.561  10
   1  16  -1 305.245 327.583  31
   1  16   0 83.0853 363.348  10
   1  16   0 92.0177 334.265  31
   1  16   0-36.9208 412.203  24
   1  16   1 65.8470 366.732  10
   1  16   1-878.530 349.829  31
   1  16   1 483.467 410.522  24
   1  16   2-525.873 406.828  24
   1  16   2 658.590 361.544  10
   1  16   3 56.6937 343.601  31
   1  16   3-547.269 388.188  24
   1  16   3 85.3662 352.386  10
   1  16   4-434.915 374.975  24
   1  16   4 247.161 351.817  31
   1  16   4-19.1429 339.922  10
   1  16   5 2794.88 412.381  10
   1  16   5 2727.90 559.757  26
   1  16   5 1305.76 414.110  31
   1  16   6-218.002 476.074  26
   1  16   6-414.730 320.939  10
   1  16   7-318.477 465.272  26
   1  16   7 365.249 312.983  10
   1  16   8 171.029 434.845  26
   1  16   9 2056.42 288.941   8
   1  16  12 277.061 213.640  14
   1  16  13-1088.02 438.288  29
   1  16  13 70.2509 224.701  14
   1  16  14 387.841 223.173  14
   1  16  15-151.989 225.126  14
   1  16  16 124.052 212.152  14
   1  16  17 965.197 222.362  14
   1  16  18-104.144 177.288  14
   1  16  19 158.879 158.296  14
   1  16  20 245.752 131.795  14
   1  16  21-61.3460 101.903  19
   1  17  -5 730.878 162.752  10
   1  17  -5 93.6791 155.534  31
   1  17  -5 300.085 221.588  26
   1  17  -4 184.035 208.607  31
   1  17  -4 311.881 289.367  26
   1  17  -4 816.311 213.075  10
   1  17  -3 795.171 286.820  24
   1  17  -2 650.778 318.948  24
   1  17  -1 41.3731 305.721  10
   1  17  -1 359.871 343.878  24
   1  17   0 2451.94 383.572  10
   1  17   0 2231.34 420.114  24
   1  17   1 1264.55 356.088  10
   1  17   1 1643.54 390.882  24
   1  17   1 516.399 330.831  31
   1  17   2 505.018 337.531  10
   1  17   2 260.199 317.452  31
   1  17   2 14.8083 377.850  24
   1  17   3 696.979 332.959  31
   1  17   3 171.249 340.308  10
   1  17   3 797.466 373.281  24
   1  17   4 193.925 354.168  24
   1  17   4-58.7562 322.204  31
   1  17   4 837.155 334.836  10
   1  17   4 260.966 473.754  26
   1  17   5 1479.52 347.423  10
   1  17   5 791.738 339.889  31
   1  17   5 1212.18 489.778  26
   1  17   6 293.647 459.667  26
   1  17   6-524.854 311.015  10
   1  17   7 641.633 440.903  26
   1  17   7 183.554 306.168  10
   1  17   8 536.396 417.454  26
   1  17  11 151.526 386.952  29
   1  17  12 1679.49 423.214  29
   1  17  12 956.955 291.075  19
   1  17  16 939.140 210.916  14
   1  17  17-145.678 174.541  14
   1  17  17 166.322 232.932  19
   1  17  18 594.525 214.664  19
   1  17  19-31.8829 172.425  19
   1  18  -4-50.4399 162.074  26
   1  18  -3 137.802 150.564  31
   1  18  -2-105.263 195.293  31
   1  18  -1 326.714 241.567  24
   1  18  -1-365.533 226.021  31
   1  18  -1 140.759 251.546  10
   1  18   0 151.524 364.360  26
   1  18   0 145.016 274.489  10
   1  18   0 495.165 286.017  24
   1  18   0 73.5874 247.805  31
   1  18   1 243.857 264.439  31
   1  18   1-361.946 296.517  10
   1  18   1-58.4385 305.007  24
   1  18   1-152.796 396.869  26
   1  18   2-542.485 322.599  24
   1  18   2 239.878 407.078  26
   1  18   2 206.617 308.524  10
   1  18   2-125.691 269.175  31
   1  18   3-84.0061 280.522  31
   1  18   3-322.222 423.152  26
   1  18   3 280.177 304.594  10
   1  18   4 231.585 432.816  26
   1  18   4 828.909 315.275  10
   1  18   5-519.521 307.446  10
   1  18   5-279.793 423.517  26
   1  18   6 179.871 418.384  26
   1  18   6 583.152 295.366  10
   1  18   7-384.820 398.992  26
   1  18   8 351.172 368.160  26
   1  18  13-229.243 220.483  19
   1  18  14 86.3638 217.571  19
   1  18  15 461.960 231.682  19
   1  18  15 326.216 215.890  28
   1  18  16 77.5390 202.048  28
   1  18  16 341.626 207.512  19
   1  18  17-125.512 187.291  19
   1  18  17 73.3976 178.830  28
   1  18  18 127.589 164.668  19
   1  18  19 31.3667 122.072  19
   1  19  -1 258.477 239.493  26
   1  19  -1 77.8124 172.778  10
   1  19   0 48.9419 205.626  10
   1  19   0-79.7170 278.542  26
   1  19   1 231.252 322.302  26
   1  19   1-52.9275 228.393  10
   1  19   2 32.5007 251.974  10
   1  19   2 231.434 340.568  26
   1  19   3-230.549 356.666  26
   1  19   3-97.5900 262.890  10
   1  19   4 256.056 370.564  26
   1  19   4 330.846 267.109  10
   1  19   5-69.9325 256.682  10
   1  19   5 178.268 373.810  26
   1  19   6 182.956 354.898  26
   1  19   6 432.301 255.902  10
   1  19   7-23.3579 331.127  26
   1  19  16-73.4339 147.423  19
   1  20   1 95.6671 207.860  26
   1  20   2 373.705 163.758  10
   1  20   2 19.7981 243.467  26
   1  20   3-62.6860 266.963  26
   1  20   3 205.953 177.108  10
   1  20   4 412.172 191.162  10
   1  20   4-26.5945 273.409  26
   1  20   5-14.9004 188.091  10
   1  20   5-67.1057 280.956  26
   1  20   6 135.073 282.679  26
  -2  19   7 104.951 205.734  10
  -2  19   6 238.286 231.776  10
  -2  19   6-99.9070 260.554  24
  -2  19   5 313.854 230.492  10
  -2  19   5-96.5466 253.404  24
  -2  19   4 1216.81 256.127  10
  -2  19   4 480.075 271.341  24
  -2  19   3 11.4472 247.291  24
  -2  19   3-228.914 233.739  10
  -2  19   2-23.6162 230.218  24
  -2  19   2 133.793 218.832  10
  -2  19   2-269.423 225.602  26
  -2  19   1-14.8705 204.535  10
  -2  19   1-92.8265 204.740  24
  -2  19   0-345.445 181.199  10
  -2  18  16 62.3180 158.746  19
  -2  18  16 161.713 162.505  28
  -2  18  15 326.477 196.909  28
  -2  18  15 255.314 176.580  19
  -2  18  14 736.488 228.664  28
  -2  18  14 746.040 210.503  19
  -2  18  13-1.47992 192.959  19
  -2  18  13 122.048 235.166  28
  -2  18  12 374.030 241.183  28
  -2  18   8-90.1532 239.924  10
  -2  18   8 311.271 282.652  24
  -2  18   7 104.612 253.567  10
  -2  18   7 127.397 298.768  24
  -2  18   6-11.9918 272.897  10
  -2  18   6-106.116 309.098  24
  -2  18   5 258.818 271.819  10
  -2  18   5 81.6578 321.881  24
  -2  18   4 300.054 322.998  24
  -2  18   4 152.109 281.642  10
  -2  18   3 309.379 322.016  26
  -2  18   3-422.974 335.549  24
  -2  18   3 655.472 282.604  10
  -2  18   2 185.369 330.802  24
  -2  18   2 412.394 271.406  10
  -2  18   2 119.441 334.660  26
  -2  18   1 664.797 271.091  10
  -2  18   1 761.558 322.455  24
  -2  18   1 178.534 323.011  26
  -2  18   0 435.247 291.937  24
  -2  18   0-140.789 311.586  26
  -2  18   0 369.182 258.216  10
  -2  18  -1 411.908 263.480  24
  -2  18  -1-174.265 288.865  26
  -2  18  -2 328.143 218.354  24
  -2  18  -2 387.880 243.111  26
  -2  18  -3 264.746 147.428  10
  -2  18  -3 59.5020 189.636  26
  -2  17  18 17.3392 131.410  19
  -2  17  18-83.1706 142.124  28
  -2  17  17 92.1001 193.112  28
  -2  17  17-133.090 172.589  19
  -2  17  16 88.4583 224.572  28
  -2  17  16-114.808 202.208  19
  -2  17  15-138.680 262.474  28
  -2  17  15-100.581 226.430  19
  -2  17  14 250.134 238.655  19
  -2  17  14 110.491 268.081  28
  -2  17  13 43.2879 257.168  19
  -2  17  13 53.5126 281.476  28
  -2  17  12-120.099 256.110  19
  -2  17  12-22.0901 302.190  28
  -2  17  11-307.400 250.726  19
  -2  17  11 210.402 298.398  28
  -2  17  10 454.452 292.620  24
  -2  17  10 262.888 305.642  28
  -2  17   9 477.153 315.182  24
  -2  17   9 370.550 301.265  28
  -2  17   8 2087.92 406.774  24
  -2  17   8 2531.51 364.082  10
  -2  17   7 500.162 289.507  10
  -2  17   7 600.912 343.212  24
  -2  17   6 320.873 226.956  15
  -2  17   6 149.388 352.987  24
  -2  17   6-16.4593 291.347  10
  -2  17   5-84.2697 365.877  24
  -2  17   5-229.624 307.118  10
  -2  17   4 519.090 370.946  26
  -2  17   4-389.070 366.328  24
  -2  17   4 429.775 315.946  10
  -2  17   3-636.817 391.576  26
  -2  17   3 267.321 378.469  24
  -2  17   3-295.912 313.303  10
  -2  17   3-449.125 394.620  21
  -2  17   2 201.814 376.562  24
  -2  17   2 592.160 313.976  10
  -2  17   2 534.297 390.764  21
  -2  17   1 266.507 381.317  21
  -2  17   1 352.839 363.255  24
  -2  17   1 12.2742 304.983  10
  -2  17   0-13.9938 341.979  21
  -2  17   0 474.303 367.250  24
  -2  17  -1 434.609 362.284  24
  -2  17  -2-228.576 330.082  24
  -2  17  -3 77.7662 286.745  24
  -2  17  -3 177.767 241.839  10
  -2  17  -4 45.0609 198.876  10
  -2  17  -4-9.66407 238.650  24
  -2  17  -5-72.0654 137.874  10
  -2  16  19-29.8901 133.660  28
  -2  16  18 75.9143 193.141  28
  -2  16  17 17.9977 212.676  19
  -2  16  16 665.230 254.932  19
  -2  16  15 368.718 267.852  19
  -2  16  14 1201.20 314.513  19
  -2  16  13 176.588 287.512  19
  -2  16  12 904.175 312.513  19
  -2  16  11-48.8678 288.234  19
  -2  16  11-114.855 343.813  28
  -2  16  11 165.862 297.854  24
  -2  16  10 791.196 300.822  19
  -2  16  10 898.876 324.161  24
  -2  16  10 600.126 347.074  28
  -2  16   9 588.259 286.451  19
  -2  16   9 693.821 340.987  28
  -2  16   9 1467.44 344.293  24
  -2  16   8 4110.53 515.504  24
  -2  16   8 2786.82 500.551  28
  -2  16   8 4056.50 478.731  10
  -2  16   7 1157.72 327.300  10
  -2  16   7 1718.84 387.162  24
  -2  16   6 1114.07 376.444  24
  -2  16   6 599.843 319.915  10
  -2  16   5 1218.29 377.583  24
  -2  16   5-102.351 252.979  15
  -2  16   5 680.688 324.997  10
  -2  16   5 750.549 400.469  21
  -2  16   4 519.107 388.857  24
  -2  16   4 80.5363 249.904  15
  -2  16   4 212.612 408.546  21
  -2  16   4-172.106 332.834  10
  -2  16   3 790.312 271.452  15
  -2  16   3 1221.10 404.387  24
  -2  16   3 855.192 348.512  10
  -2  16   3 318.486 432.087  21
  -2  16   2 616.438 428.557  24
  -2  16   2 1547.51 299.555  15
  -2  16   2 1269.06 452.592  21
  -2  16   2 2063.04 373.023  10
  -2  16   1 1636.03 433.350  21
  -2  16   1 887.835 430.333  24
  -2  16   1 1674.66 366.599  10
  -2  16   1 1129.85 295.260  15
  -2  16   0-256.312 400.512  24
  -2  16  -1 456.498 402.073  24
  -2  16  -2 337.746 178.481   6
  -2  16  -2-238.001 369.461  21
  -2  16  -2 175.141 394.307  24
  -2  16  -3 624.150 184.852   6
  -2  16  -3 492.234 305.958  10
  -2  16  -3 864.896 356.918  21
  -2  16  -3 962.433 383.677  24
  -2  16  -4 973.113 276.121  10
  -2  16  -4 722.362 167.593   6
  -2  16  -4 1022.40 343.101  24
  -2  16  -4 80.7183 210.701  31
  -2  16  -5-8.73411 230.051  10
  -2  16  -5 46.8457 128.638   6
  -2  16  -5 476.466 293.365  24
  -2  16  -6-56.5300 220.013  24
  -2  16  -6 274.862 180.633  10
  -2  15  19 138.396 161.441  19
  -2  15  18 191.187 196.063  34
  -2  15  18 66.2748 208.568  19
  -2  15  17 291.614 234.166  34
  -2  15  17-65.6845 197.896  14
  -2  15  16-189.787 270.663  34
  -2  15  16 264.700 215.628  14
  -2  15  15-168.379 231.255  14
  -2  15  15 613.148 289.690  19
  -2  15  15 336.425 297.158  34
  -2  15  14-6.02861 304.014  19
  -2  15  14 69.4033 309.176  34
  -2  15  14-146.320 245.805  14
  -2  15  13 777.209 257.914  14
  -2  15  13-157.216 287.256  24
  -2  15  13-94.3438 326.726  19
  -2  15  12 216.890 262.927  14
  -2  15  12 838.746 330.711  19
  -2  15  12 73.6476 300.812  24
  -2  15  11 1314.39 351.431  19
  -2  15  11 684.013 331.769  24
  -2  15  10 598.219 333.065  24
  -2  15  10 215.905 317.396  19
  -2  15   9-430.387 340.925  24
  -2  15   9 265.899 358.449  28
  -2  15   9-228.656 307.731  19
  -2  15   8 935.578 362.386  24
  -2  15   8 787.862 357.858  28
  -2  15   8 20.8452 297.157  19
  -2  15   7 39.1375 362.275  24
  -2  15   7-132.614 336.812  28
  -2  15   6-708.733 320.561  10
  -2  15   6 21.8267 374.636  24
  -2  15   5 509.271 387.501  24
  -2  15   5 642.195 336.377  10
  -2  15   5 1000.13 423.039  21
  -2  15   4-41.6731 395.516  24
  -2  15   4 27.1661 337.956  10
  -2  15   4-26.7907 449.939  21
  -2  15   3-440.236 408.795  24
  -2  15   3 175.895 270.399  15
  -2  15   3 170.316 451.135  21
  -2  15   3 166.107 348.174  10
  -2  15   2 956.005 435.358  24
  -2  15   2 1706.54 375.515  10
  -2  15   2 1616.00 492.209  21
  -2  15   2 1229.71 306.626  15
  -2  15   1 84.0946 350.516  10
  -2  15   1-112.891 456.247  21
  -2  15   1 131.587 277.140  15
  -2  15   1 386.876 426.850  24
  -2  15   0 256.449 425.350  24
  -2  15   0 620.567 280.770  15
  -2  15   0 315.346 299.408  31
  -2  15  -1-14.4117 225.300   6
  -2  15  -1 34.9713 439.356  24
  -2  15  -1-265.195 291.798  31
  -2  15  -1 119.618 274.363  15
  -2  15  -2-213.652 335.484  10
  -2  15  -2 166.674 224.466   6
  -2  15  -2-336.843 271.676  15
  -2  15  -2 202.115 415.228  21
  -2  15  -2 34.8478 292.417  31
  -2  15  -2-410.026 425.925  24
  -2  15  -3-109.107 217.227   6
  -2  15  -3 391.518 425.924  24
  -2  15  -3 122.402 321.934  10
  -2  15  -3 117.178 253.559  15
  -2  15  -3 194.747 398.937  21
  -2  15  -4 177.218 361.399  21
  -2  15  -4 386.627 210.528   6
  -2  15  -4 316.836 318.007  10
  -2  15  -4 301.125 397.349  24
  -2  15  -5 66.7954 362.822  24
  -2  15  -5 280.989 197.032   6
  -2  15  -5 189.828 342.669  21
  -2  15  -5 878.687 298.760  10
  -2  15  -6 113.141 330.702  24
  -2  15  -6 325.787 168.932   6
  -2  15  -6-257.002 214.659  31
  -2  15  -6 108.640 256.074  10
  -2  15  -7-216.763 264.342  24
  -2  15  -7 48.6848 169.472  31
  -2  15  -7-142.329 138.362   6
  -2  15  -7 346.393 208.568  10
  -2  14  20-184.608 192.770  29
  -2  14  20-30.5155 128.269  19
  -2  14  19-1.51184 187.873  19
  -2  14  19 121.088 200.872  34
  -2  14  19 161.562 155.074  14
  -2  14  18 87.6275 223.671  19
  -2  14  18-2.51312 249.700  34
  -2  14  17-272.003 260.066  19
  -2  14  17 55.3830 289.712  34
  -2  14  16 7.05426 318.962  34
  -2  14  15 192.623 341.203  34
  -2  14  15 498.467 253.142  14
  -2  14  14-8.08641 264.641  14
  -2  14  14 586.850 355.868  34
  -2  14  14-172.626 282.416  24
  -2  14  13 313.057 355.675  34
  -2  14  13-291.813 275.051  14
  -2  14  13 236.981 296.676  24
  -2  14  12 97.5695 356.439  34
  -2  14  12 112.561 314.799  24
  -2  14  12-413.836 283.942  14
  -2  14  11 121.597 362.825  34
  -2  14  11 226.324 277.462  14
  -2  14  11 540.809 326.171  24
  -2  14  10 257.087 269.080  14
  -2  14  10-3.40260 339.423  24
  -2  14   9 702.626 342.184  24
  -2  14   9 263.644 342.582  19
  -2  14   8 822.468 437.834   5
  -2  14   8 821.933 355.333  24
  -2  14   8 355.352 324.991  19
  -2  14   7 2675.42 495.167  28
  -2  14   7 3299.11 506.198  24
  -2  14   6 5599.05 703.667   5
  -2  14   6 4259.82 619.395  28
  -2  14   6 4545.52 655.682  21
  -2  14   6 5845.31 640.202  24
  -2  14   5 3214.38 574.790   5
  -2  14   5 2909.80 482.492  24
  -2  14   5 2726.89 520.743  21
  -2  14   4 893.183 398.424  24
  -2  14   4 606.058 469.089  21
  -2  14   3 568.308 343.415  10
  -2  14   3 132.790 434.925  21
  -2  14   3 288.893 398.175  24
  -2  14   2 5107.07 738.938  21
  -2  14   2 5384.92 678.793  10
  -2  14   2 6004.91 716.758  24
  -2  14   2 5748.03 641.118  15
  -2  14   1 2894.79 530.782  24
  -2  14   1 2495.69 533.196   3
  -2  14   1 3297.67 565.621  21
  -2  14   1 3141.67 424.442  15
  -2  14   1 3212.84 483.386  10
  -2  14   0 36.5643 442.734  24
  -2  14   0 491.455 285.980  15
  -2  14   0 79.5261 246.076   6
  -2  14  -1 701.967 262.773   6
  -2  14  -1 603.191 448.979  24
  -2  14  -1 701.496 304.624  15
  -2  14  -2 23.4076 434.905  21
  -2  14  -2-376.573 252.091   6
  -2  14  -2 264.048 364.531  10
  -2  14  -2-306.932 452.984  24
  -2  14  -2-427.584 298.883  15
  -2  14  -3 2240.23 391.066  10
  -2  14  -3 1192.30 327.355  15
  -2  14  -3 1144.08 294.149   6
  -2  14  -3 1404.92 472.690  21
  -2  14  -3 1009.89 475.449  24
  -2  14  -4 219.980 406.799  21
  -2  14  -4-69.0563 439.422  24
  -2  14  -4 185.743 283.109  15
  -2  14  -4-32.1601 336.327  10
  -2  14  -4-353.137 241.524   6
  -2  14  -5 1191.57 445.887  24
  -2  14  -5 723.223 253.953   6
  -2  14  -5 1013.83 405.709  21
  -2  14  -5 1211.73 352.397  10
  -2  14  -6 75.9168 338.393  21
  -2  14  -6-123.142 309.643  10
  -2  14  -6-291.297 396.908  24
  -2  14  -6 91.9513 220.968   6
  -2  14  -7 95.1747 268.556  10
  -2  14  -7-8.34072 191.278   6
  -2  14  -8 209.581 161.669   6
  -2  14  -8 74.1070 216.814  10
  -2  14  -9-46.4544 150.360  31
  -2  14  -9-63.7018 120.711   6
  -2  13  20 38.5047 127.052  14
  -2  13  20-1.11669 147.604  19
  -2  13  20-152.231 180.332  34
  -2  13  19 231.533 238.696  34
  -2  13  19-49.5071 172.494  14
  -2  13  19-34.9764 198.277  19
  -2  13  18-136.290 202.298  14
  -2  13  18-339.625 298.375  34
  -2  13  18 216.978 235.721  19
  -2  13  17 590.611 283.785  19
  -2  13  17-424.717 330.744  34
  -2  13  16 20.7311 353.744  34
  -2  13  15-221.691 277.698  24
  -2  13  15 312.062 377.030  34
  -2  13  14 552.182 299.088  24
  -2  13  14-119.960 389.477  34
  -2  13  14-60.4867 278.636  14
  -2  13  13 64.8908 388.963  34
  -2  13  13 255.375 294.904  14
  -2  13  13-140.293 321.463  24
  -2  13  12 113.556 399.177  34
  -2  13  12-370.104 330.541  24
  -2  13  12 189.988 289.550  14
  -2  13  11 771.492 328.072  24
  -2  13  11-320.235 290.816  14
  -2  13  11-73.8129 381.706  34
  -2  13  10-49.5669 280.071  14
  -2  13  10 392.945 366.808  34
  -2  13  10 412.753 332.829  24
  -2  13  10 284.238 381.978   5
  -2  13   9 494.769 274.997  14
  -2  13   9 662.311 395.950   5
  -2  13   9 794.573 348.305  24
  -2  13   8-125.976 259.114  14
  -2  13   8 263.673 339.243  24
  -2  13   8-511.999 399.065   5
  -2  13   7 3698.65 533.771  19
  -2  13   7 5511.85 616.149   5
  -2  13   7 3916.88 555.784  24
  -2  13   6 821.431 389.587  21
  -2  13   6 650.942 346.513  28
  -2  13   6 535.392 345.272  24
  -2  13   5 1388.35 381.989  24
  -2  13   5 2426.39 476.800   5
  -2  13   5 1147.30 358.032  28
  -2  13   5 1089.87 450.309  21
  -2  13   4 272.585 419.091  21
  -2  13   4-233.551 451.731   5
  -2  13   4 379.238 356.943  24
  -2  13   3 171.618 364.852  24
  -2  13   3 225.874 414.238  21
  -2  13   2 67.1920 414.419  21
  -2  13   2 402.670 334.219  10
  -2  13   2 401.605 386.453  24
  -2  13   2-226.839 386.035   3
  -2  13   1 966.079 435.055  24
  -2  13   1 1628.55 311.846  15
  -2  13   1 1902.76 459.772   3
  -2  13   1 855.567 496.751  21
  -2  13   1 1209.89 369.267  10
  -2  13   0-74.7092 420.960   3
  -2  13   0-21.2062 252.860   6
  -2  13   0 69.4756 286.905  15
  -2  13   0 216.973 420.205  24
  -2  13  -1 351.253 298.785  15
  -2  13  -1 7.50115 272.398   6
  -2  13  -1 345.688 446.205  24
  -2  13  -1 171.193 459.548   3
  -2  13  -2 236.967 273.657   6
  -2  13  -2-328.550 449.982  24
  -2  13  -2 190.547 354.740  10
  -2  13  -2 171.557 465.613  21
  -2  13  -2 98.9698 312.502  15
  -2  13  -2 264.648 448.897   3
  -2  13  -3 135.714 274.880   6
  -2  13  -3-114.991 358.066  10
  -2  13  -3 169.230 315.241  15
  -2  13  -3-65.6454 441.962  21
  -2  13  -3 96.5385 462.710  24
  -2  13  -4-14.1913 308.388  15
  -2  13  -4-274.717 481.035  24
  -2  13  -4-10.6287 277.419   6
  -2  13  -4-81.1692 424.537  21
  -2  13  -4 271.008 368.881  10
  -2  13  -5-42.0744 429.818  21
  -2  13  -5 378.876 307.009  15
  -2  13  -5 221.981 268.821   6
  -2  13  -5 279.734 354.376  10
  -2  13  -6 707.063 342.666  10
  -2  13  -6 177.111 258.669   6
  -2  13  -7 676.291 325.534  10
  -2  13  -7 611.914 361.866  21
  -2  13  -7 978.524 251.430   6
  -2  13  -8 379.857 212.536   6
  -2  13  -8-1.53223 269.183  10
  -2  13  -9 71.3434 179.221   6
  -2  13  -9 112.927 223.722  10
  -2  13 -10-246.243 140.620   6
  -2  12  20 111.780 214.278  34
  -2  12  20 53.0605 142.164  14
  -2  12  20 267.005 161.558  19
  -2  12  19-75.2698 274.836  34
  -2  12  19 268.732 211.102  19
  -2  12  19 107.315 177.084  14
  -2  12  18 125.995 318.565  34
  -2  12  18 481.392 205.480  14
  -2  12  18-157.240 245.932  19
  -2  12  18-184.938 178.015   7
  -2  12  17-25.1838 361.074  34
  -2  12  17 79.0475 198.653   7
  -2  12  17 455.498 226.509  14
  -2  12  16 27.9527 214.583   7
  -2  12  16 145.018 263.606  14
  -2  12  16 204.602 395.721  34
  -2  12  16-222.164 279.299  24
  -2  12  15 987.118 434.429  34
  -2  12  15 1377.07 335.802  24
  -2  12  15 1456.40 271.324   7
  -2  12  14 864.002 349.331  24
  -2  12  14 399.109 432.487  34
  -2  12  13 3281.14 618.171  34
  -2  12  13 4518.55 494.344   7
  -2  12  13 4056.52 552.945  24
  -2  12  12 444.104 314.030  14
  -2  12  12 1135.28 252.220   7
  -2  12  12 568.845 347.002  24
  -2  12  12 714.902 426.920  34
  -2  12  11 5051.56 540.107  14
  -2  12  11 4190.35 557.364  24
  -2  12  11 3132.31 604.694  34
  -2  12  11 4246.15 601.533   5
  -2  12  10-224.690 321.182  24
  -2  12  10-143.333 281.093  14
  -2  12  10 197.928 373.307   5
  -2  12  10 353.440 379.147  34
  -2  12   9 291.827 317.991  24
  -2  12   9 542.910 431.883  29
  -2  12   9 651.295 267.248  14
  -2  12   9-97.3272 371.737   5
  -2  12   9 251.090 357.117  34
  -2  12   8 723.292 327.462  24
  -2  12   8 456.664 380.949   5
  -2  12   8 1144.12 268.502  14
  -2  12   7 186.913 243.206  14
  -2  12   7-275.772 374.936   5
  -2  12   7-243.945 317.216  24
  -2  12   6 6978.49 833.362  24
  -2  12   6 8246.57 873.664   5
  -2  12   5 6039.34 752.529  24
  -2  12   5 7502.39 803.809   5
  -2  12   4-103.498 394.212  21
  -2  12   4 337.184 322.185  24
  -2  12   4-165.563 395.709   5
  -2  12   4 412.558 336.481   3
  -2  12   3 369.139 418.157   5
  -2  12   3-290.487 407.599  21
  -2  12   3-627.676 357.410   3
  -2  12   3 399.563 327.521  24
  -2  12   2 2121.63 488.520  21
  -2  12   2 3423.85 544.302   5
  -2  12   2 2540.68 454.835  24
  -2  12   2 3327.38 495.535   3
  -2  12   1 1480.33 435.850   3
  -2  12   1 854.437 396.285  24
  -2  12   1 1609.83 459.915  21
  -2  12   0 7617.23 777.607   3
  -2  12   0 6464.90 787.171  21
  -2  12   0 5580.48 686.853  15
  -2  12   0 4623.81 749.484  24
  -2  12   0 6779.48 685.180   6
  -2  12  -1 2751.95 507.423   3
  -2  12  -1 2093.35 347.878   6
  -2  12  -1 2297.48 369.730  15
  -2  12  -1 2378.58 482.595  24
  -2  12  -2 5325.62 665.081  15
  -2  12  -2 6827.68 768.988   3
  -2  12  -2 6230.00 742.404  24
  -2  12  -2 5255.25 683.953  10
  -2  12  -2 5748.93 744.798  21
  -2  12  -2 5775.91 654.696   6
  -2  12  -3 2393.72 413.868  15
  -2  12  -3 2883.16 534.240  21
  -2  12  -3 2441.58 393.989   6
  -2  12  -3 2589.81 448.043  10
  -2  12  -3 2550.38 526.663  24
  -2  12  -3 2720.71 557.313   3
  -2  12  -4 1435.67 328.173   6
  -2  12  -4 1543.29 497.203   3
  -2  12  -4 1440.54 490.414  24
  -2  12  -4 1423.09 361.453  15
  -2  12  -4 1034.76 396.996  10
  -2  12  -4 1361.89 475.757  21
  -2  12  -5 2453.27 542.971  21
  -2  12  -5 3256.45 417.028   6
  -2  12  -5 3129.65 478.533  10
  -2  12  -5 2281.81 442.475  15
  -2  12  -6 1213.64 357.858  15
  -2  12  -6 1940.97 451.613  21
  -2  12  -6 1869.64 394.338  10
  -2  12  -6 1189.03 326.364   6
  -2  12  -7 786.668 285.966   6
  -2  12  -7 521.362 400.067  21
  -2  12  -7 1519.09 367.800  10
  -2  12  -8 343.637 321.800  10
  -2  12  -8 86.7899 244.465   6
  -2  12  -8-131.977 326.073  21
  -2  12  -9 584.109 384.602  24
  -2  12  -9 706.797 288.781  10
  -2  12 -10 898.697 332.469  24
  -2  12 -10 989.021 241.697  10
  -2  11  21 68.9177 185.435  29
  -2  11  21 171.092 95.7551  14
  -2  11  21 22.9431 157.620  34
  -2  11  20-146.187 162.224  19
  -2  11  20 41.3236 234.291  34
  -2  11  20 48.4391 150.302  14
  -2  11  19-146.268 293.144  34
  -2  11  19-168.785 186.643  14
  -2  11  19 96.6143 160.493   7
  -2  11  19 73.0909 211.346  19
  -2  11  18 506.352 344.463  34
  -2  11  18 355.333 256.281  19
  -2  11  18 247.358 215.192  14
  -2  11  18 73.9055 187.574   7
  -2  11  17-67.5852 246.354  14
  -2  11  17 371.830 261.744  24
  -2  11  17 658.377 213.483   7
  -2  11  16 379.545 303.029  24
  -2  11  16 854.387 243.293   7
  -2  11  16 1137.19 280.408  14
  -2  11  15 66.7123 235.809   7
  -2  11  15 50.5734 286.072  14
  -2  11  15 583.700 312.855  24
  -2  11  14-291.702 328.822  24
  -2  11  14 254.256 244.248   7
  -2  11  13-368.986 331.782  24
  -2  11  13 62.8674 241.875   7
  -2  11  12-34.5278 233.996   7
  -2  11  12-388.982 334.467  24
  -2  11  11 336.468 330.402  24
  -2  11  11 100.413 283.951  14
  -2  11  11 83.1180 228.639   7
  -2  11  11 228.821 372.422   5
  -2  11  11-536.276 414.084  34
  -2  11  10 4.44101 387.226  34
  -2  11  10 720.416 429.012  29
  -2  11  10 227.272 360.661   5
  -2  11  10 521.399 276.729  14
  -2  11  10-107.905 317.141  24
  -2  11  10-204.243 220.564   7
  -2  11   9 4931.77 733.454  29
  -2  11   9 8420.75 715.166   5
  -2  11   9 2567.48 698.212  34
  -2  11   9 5159.82 676.158  24
  -2  11   9 6414.01 632.866   7
  -2  11   9 6324.55 657.752  14
  -2  11   8-438.596 351.739   5
  -2  11   8 170.876 247.102  14
  -2  11   7 1487.96 374.717   5
  -2  11   6 341.822 339.643   5
  -2  11   5 3513.11 507.182   5
  -2  11   4 2196.53 367.409   3
  -2  11   4 1371.40 413.148   5
  -2  11   3 134.115 323.579   3
  -2  11   3 512.235 360.112   5
  -2  11   2 243.764 352.429   3
  -2  11   2 187.666 385.393   5
  -2  11   1-31.3182 319.688  24
  -2  11   1 181.992 372.705   3
  -2  11   1 370.711 394.631   5
  -2  11   0 411.892 390.048   3
  -2  11   0-82.4304 344.310  24
  -2  11  -1 460.886 402.226   3
  -2  11  -1 614.435 373.533  24
  -2  11  -1 296.904 241.683   6
  -2  11  -1 291.897 262.592  15
  -2  11  -2-578.420 439.276   3
  -2  11  -2 189.903 317.908  10
  -2  11  -2 668.803 280.864  15
  -2  11  -2 240.561 411.225  24
  -2  11  -2-94.0117 258.573   6
  -2  11  -3 1524.11 496.159  24
  -2  11  -3 2402.27 376.408  15
  -2  11  -3 2296.70 356.575   6
  -2  11  -3 1848.93 505.141   3
  -2  11  -3 2386.54 419.120  10
  -2  11  -4 669.583 320.738  15
  -2  11  -4 158.228 344.491  10
  -2  11  -4-685.066 433.723  21
  -2  11  -4 38.7024 286.875   6
  -2  11  -4-206.756 460.668   3
  -2  11  -5 739.530 298.949   6
  -2  11  -5 480.465 342.448  15
  -2  11  -5 337.286 364.523  10
  -2  11  -5 528.969 427.144  21
  -2  11  -5-174.445 480.781   3
  -2  11  -6-124.054 291.211   6
  -2  11  -6 101.700 345.745  15
  -2  11  -6 14.5768 359.841  10
  -2  11  -6-522.901 393.097  21
  -2  11  -7 573.211 340.293  15
  -2  11  -7-24.1316 412.785  21
  -2  11  -7 32.4919 362.366  10
  -2  11  -7 849.590 512.552  24
  -2  11  -7 557.934 299.546   6
  -2  11  -8-537.586 347.201  10
  -2  11  -8 40.2493 479.587  24
  -2  11  -8-504.676 379.045  30
  -2  11  -8-416.262 380.598  21
  -2  11  -9 110.305 329.277  21
  -2  11  -9 606.100 317.030  10
  -2  11  -9-90.6457 341.285  30
  -2  11  -9-407.962 445.121  24
  -2  11 -10-60.5033 385.121  24
  -2  11 -10 203.019 268.745  10
  -2  11 -10 481.123 294.152  30
  -2  11 -11 41.3119 325.858  24
  -2  11 -11-42.2487 192.423   6
  -2  11 -11-92.2971 202.117  10
  -2  11 -12-46.9947 150.193   6
  -2  10  21 146.423 98.3808  14
  -2  10  21 113.145 197.774  29
  -2  10  20-20.9795 160.065  19
  -2  10  20 361.270 152.412  14
  -2  10  20 202.402 142.587   7
  -2  10  19-6.90539 166.012   7
  -2  10  19 72.9766 183.585  14
  -2  10  19 230.124 211.282  19
  -2  10  19 94.6494 312.810  34
  -2  10  18 292.167 260.336  19
  -2  10  18 625.109 230.672  14
  -2  10  18 49.9491 243.516  24
  -2  10  18 540.197 199.707   7
  -2  10  17 567.207 226.296   7
  -2  10  17 565.970 290.712  24
  -2  10  17 81.8042 254.090  14
  -2  10  16 628.169 284.008  14
  -2  10  16 841.329 243.491   7
  -2  10  16 328.238 310.111  24
  -2  10  15 627.336 298.912  14
  -2  10  15 438.386 329.591  24
  -2  10  15 151.054 245.127   7
  -2  10  14 7.29074 339.288  24
  -2  10  14 223.463 251.102   7
  -2  10  14 687.576 310.986  14
  -2  10  13 173.933 247.480   7
  -2  10  13-45.0590 374.459   5
  -2  10  13 455.834 296.679  14
  -2  10  13 191.897 340.130  24
  -2  10  12 59.7396 322.775  24
  -2  10  12 294.672 376.465   5
  -2  10  12 184.838 234.131   7
  -2  10  11 1509.49 271.618   7
  -2  10  11 1750.13 361.308  24
  -2  10  11 984.342 395.137   5
  -2  10  10 676.001 310.454  24
  -2  10  10 169.687 212.724   7
  -2  10  10 441.733 353.202   5
  -2  10  10 592.191 266.136  14
  -2  10  10 231.002 430.737  29
  -2  10   9 182.938 255.568  14
  -2  10   9 326.572 335.743   5
  -2  10   8 3424.90 499.014   5
  -2  10   7 7617.27 858.299   5
  -2  10   6 73.6230 313.926   5
  -2  10   5 1919.74 360.087   3
  -2  10   5 2832.71 405.006   5
  -2  10   4 1144.95 312.712   3
  -2  10   4 1390.71 345.299   5
  -2  10   3 806.387 345.942   5
  -2  10   3 816.775 323.735   3
  -2  10   2 4762.36 601.604   3
  -2  10   2 4947.26 613.095   5
  -2  10   1 1085.25 347.533   3
  -2  10   1 663.592 366.103   5
  -2  10   0 351.691 350.672   3
  -2  10  -1 388.369 376.399   3
  -2  10  -2-109.618 348.167  24
  -2  10  -2 299.400 286.918  10
  -2  10  -2-271.614 375.166   3
  -2  10  -3-350.211 277.917  15
  -2  10  -3-78.3670 410.546   3
  -2  10  -3 484.748 260.275   6
  -2  10  -3 569.702 300.871  10
  -2  10  -4-298.715 440.354   3
  -2  10  -4 348.737 279.908   6
  -2  10  -4 311.520 332.850  10
  -2  10  -4 443.037 312.851  15
  -2  10  -5 5610.19 673.622  10
  -2  10  -5 5606.64 650.162   6
  -2  10  -5 5418.20 665.643  15
  -2  10  -6 728.109 498.179  24
  -2  10  -6 868.164 359.802  15
  -2  10  -6 518.099 311.958   6
  -2  10  -6 958.162 371.243  10
  -2  10  -6 958.310 445.074  21
  -2  10  -7 1819.31 433.127  21
  -2  10  -7 872.509 514.946  24
  -2  10  -7 1086.03 507.656   3
  -2  10  -7 1493.50 392.537  10
  -2  10  -7 1827.66 387.214  15
  -2  10  -8 1647.87 389.051  15
  -2  10  -8 2207.70 535.029  24
  -2  10  -8 1717.81 405.987  10
  -2  10  -8 2406.05 423.039  21
  -2  10  -9 508.935 360.973  21
  -2  10  -9 471.490 407.064  30
  -2  10  -9 576.093 338.998  10
  -2  10  -9 802.134 499.606  24
  -2  10 -10 1007.71 444.237  24
  -2  10 -10 398.832 394.203  30
  -2  10 -10 1321.45 333.426  10
  -2  10 -10 1317.36 289.788   6
  -2  10 -11 195.317 395.975  24
  -2  10 -11 34.8403 333.220  30
  -2  10 -11-228.143 227.128   6
  -2  10 -11 204.650 247.835  10
  -2  10 -12 345.601 305.037  30
  -2  10 -12 1964.53 245.745   6
  -2  10 -13-82.1007 148.393   6
  -2  10 -13 192.308 188.479  30
  -2   9  21 32.5649 98.6065  14
  -2   9  21 305.257 179.469  34
  -2   9  21 184.094 208.944  29
  -2   9  20 585.855 157.473  14
  -2   9  20-60.2259 291.362  29
  -2   9  19-293.376 188.883  14
  -2   9  19-130.937 200.272  19
  -2   9  19 15.9650 204.228  24
  -2   9  18 17.7103 249.413  19
  -2   9  18-63.1745 222.092  14
  -2   9  18-181.317 258.338  24
  -2   9  17 58.9354 254.104  14
  -2   9  17 116.961 297.000  24
  -2   9  16-387.578 318.670  24
  -2   9  16-133.815 271.196  14
  -2   9  15-426.556 339.245  24
  -2   9  15 99.5678 294.517  14
  -2   9  15 115.248 249.527   7
  -2   9  14 130.372 257.228   7
  -2   9  14 560.427 347.198  24
  -2   9  14 389.693 298.466  14
  -2   9  13-386.069 339.866  24
  -2   9  13-57.4783 377.195   5
  -2   9  13 372.333 306.799  14
  -2   9  13 74.9358 248.199   7
  -2   9  12 984.302 352.121  24
  -2   9  12 1070.08 379.669   5
  -2   9  12 986.070 304.819  14
  -2   9  12 964.413 257.537   7
  -2   9  11 1490.63 377.278   5
  -2   9  11 1452.84 255.786   7
  -2   9  10 497.172 346.456   5
  -2   9  10 460.610 212.788   7
  -2   9   9 1637.74 362.743   5
  -2   9   8-369.615 310.071   5
  -2   9   7 3645.72 494.947   5
  -2   9   6 16215.4 1700.34   5
  -2   9   5 8900.94 949.956   5
  -2   9   5 8451.10 930.660   3
  -2   9   4-335.316 291.276   3
  -2   9   4-21.1907 323.082   5
  -2   9   3 2431.10 398.891   3
  -2   9   3 2286.25 405.429   5
  -2   9   2-135.885 317.703   3
  -2   9   2 45.1924 338.484   5
  -2   9   1 3183.97 463.822   3
  -2   9   1 2989.42 484.993   5
  -2   9   0 399.728 350.435   5
  -2   9   0 518.394 333.439   3
  -2   9  -1 2322.29 330.254   1
  -2   9  -1 2170.56 411.475   3
  -2   9  -2 65.3750 238.220   1
  -2   9  -2 16.2348 345.437   3
  -2   9  -3-11.7835 369.421   3
  -2   9  -3 520.638 261.443   1
  -2   9  -4 468.820 294.837   1
  -2   9  -4 749.774 301.633  10
  -2   9  -4 642.998 252.830   6
  -2   9  -4 195.795 276.937  15
  -2   9  -5 211.797 403.112  24
  -2   9  -5 85.3176 271.236   6
  -2   9  -5 163.471 311.940  15
  -2   9  -5 312.957 325.583  10
  -2   9  -5 200.383 314.691   1
  -2   9  -6-56.7441 446.190   3
  -2   9  -6 428.443 343.700  15
  -2   9  -6 604.426 294.340   6
  -2   9  -6 182.825 465.428  24
  -2   9  -6 297.083 331.975  10
  -2   9  -7 491.200 354.848  10
  -2   9  -7 305.113 506.731  24
  -2   9  -7 765.043 363.364  15
  -2   9  -7 448.848 481.069   3
  -2   9  -7 535.033 414.229  21
  -2   9  -8 463.572 525.112  24
  -2   9  -8 672.555 361.625  15
  -2   9  -8 482.855 359.470  10
  -2   9  -8 363.842 397.802  21
  -2   9  -8 805.476 483.804   3
  -2   9  -9 112.236 299.251   6
  -2   9  -9 81.1218 494.743  24
  -2   9  -9-135.117 357.071  21
  -2   9  -9-233.408 350.812  10
  -2   9 -10 940.065 438.140  30
  -2   9 -10-62.5311 337.601  10
  -2   9 -10 101.965 489.915  24
  -2   9 -10 302.548 276.897   6
  -2   9 -11 120.007 408.776  30
  -2   9 -11 533.095 429.389  24
  -2   9 -11 161.563 290.962  10
  -2   9 -11 2.45295 252.922   6
  -2   9 -12 127.372 346.193  30
  -2   9 -12 534.742 228.749   6
  -2   9 -12-161.122 385.020  24
  -2   9 -13-129.330 291.684  30
  -2   9 -13-76.2245 189.578   6
  -2   9 -14 52.4748 219.733  30
  -2   9 -14 180.934 142.772   6
  -2   8  21 347.740 183.977  34
  -2   8  20-181.064 142.031  14
  -2   8  20 180.046 261.370  34
  -2   8  19 66.7305 182.290  14
  -2   8  19-7.93453 220.864  24
  -2   8  18 1032.32 254.234  19
  -2   8  18 881.561 235.950  14
  -2   8  18 302.533 287.065  24
  -2   8  17 1355.41 341.475  24
  -2   8  17 1414.51 296.358  14
  -2   8  16 461.148 271.941  14
  -2   8  15 881.356 306.478  14
  -2   8  14 538.695 305.934  14
  -2   8  14 813.996 391.814   5
  -2   8  13-281.274 358.938   5
  -2   8  13 86.2388 289.323  14
  -2   8  12 3943.84 538.037   5
  -2   8  12 3534.23 482.235  14
  -2   8  11-67.2944 270.019  14
  -2   8  11 191.099 337.084   5
  -2   8  11-362.242 423.288  34
  -2   8  10 6059.55 711.085   5
  -2   8   9 3350.22 474.401   5
  -2   8   8 16389.5 1716.51   5
  -2   8   7 27013.7 2786.17   5
  -2   8   6 60.7585 218.149   3
  -2   8   6 219.982 322.676   5
  -2   8   5 32045.2 3324.32   3
  -2   8   5 33119.8 3336.21   5
  -2   8   4 5231.14 616.846   3
  -2   8   4 5231.58 639.231   5
  -2   8   3 598.259 332.120   3
  -2   8   3 1272.39 358.399   5
  -2   8   2 83892.9 8510.54   3
  -2   8   2 82833.1 8512.58   5
  -2   8   1 5141.06 669.649   5
  -2   8   1 5687.40 662.003   3
  -2   8   0 73162.2 7434.67   1
  -2   8   0 72361.6 7446.72   3
  -2   8  -1 3735.84 458.223   1
  -2   8  -1 3789.94 516.005   3
  -2   8  -2 6648.05 798.586   3
  -2   8  -2 7038.44 753.719   1
  -2   8  -3 1739.14 318.038   1
  -2   8  -4-545.627 281.868   1
  -2   8  -5-110.237 236.146   6
  -2   8  -5 4.49442 297.687   1
  -2   8  -5 102.519 374.243   3
  -2   8  -5 38.3602 276.379  10
  -2   8  -5 83.6674 367.354  24
  -2   8  -6 148.662 312.503  10
  -2   8  -6 582.164 305.791  15
  -2   8  -6-76.1586 344.609   1
  -2   8  -6-194.893 408.275   3
  -2   8  -6 656.218 420.138  24
  -2   8  -7-297.579 347.112  15
  -2   8  -7-238.663 330.336  10
  -2   8  -7-5.63877 351.049   1
  -2   8  -7-247.871 433.677   3
  -2   8  -7-86.4028 468.812  24
  -2   8  -8 2390.47 444.080  15
  -2   8  -8 2478.90 461.846   1
  -2   8  -8 1665.36 554.724  24
  -2   8  -8 2580.67 519.531   3
  -2   8  -8 1785.20 438.812  21
  -2   8  -8 2442.47 428.232  10
  -2   8  -8 2693.29 389.188   6
  -2   8  -9 1111.66 473.446   3
  -2   8  -9-17.1133 506.364  24
  -2   8  -9 428.157 308.230   6
  -2   8  -9-53.1546 383.395  21
  -2   8  -9 1106.22 372.353  15
  -2   8  -9 1178.79 358.961  10
  -2   8 -10 333.275 291.339   6
  -2   8 -10 443.082 338.666  10
  -2   8 -10 85.1105 524.894  24
  -2   8 -11 613.903 275.032   6
  -2   8 -11-459.507 298.920  10
  -2   8 -11 253.660 458.479  30
  -2   8 -11 20.2409 476.707  24
  -2   8 -12 543.204 422.785  30
  -2   8 -12 844.109 265.766   6
  -2   8 -12 606.634 440.019  24
  -2   8 -13 461.020 227.504   6
  -2   8 -13 261.568 366.044  30
  -2   8 -14 262.243 182.872   6
  -2   8 -14 379.702 299.716  30
  -2   8 -15 57.9436 215.862  30
  -2   7  21 116.367 103.968   7
  -2   7  21 216.360 176.585  34
  -2   7  20 27.0796 145.757   7
  -2   7  20 349.076 137.123  14
  -2   7  20-288.214 299.592  29
  -2   7  19 372.413 176.800  14
  -2   7  19 101.497 180.508   7
  -2   7  19-21.2116 231.814  24
  -2   7  18-207.413 209.196   7
  -2   7  18-20.4646 212.572  14
  -2   7  17-7.34719 246.807  14
  -2   7  16 227.549 268.030  14
  -2   7  16-183.445 472.771  34
  -2   7  15 1156.95 317.740  14
  -2   7  14 2335.92 469.308   5
  -2   7  14 2399.54 395.066  14
  -2   7  13 581.164 295.722  14
  -2   7  13 349.333 366.906   5
  -2   7  12 65.6900 349.851   5
  -2   7  11 528.411 326.101   5
  -2   7  10 725.753 317.022   5
  -2   7   9 3508.66 481.702   5
  -2   7   8 3324.87 463.154   5
  -2   7   7 9236.74 1007.48   5
  -2   7   6 82.5091 325.617   5
  -2   7   5 2697.89 372.499   3
  -2   7   5 2673.17 433.148   5
  -2   7   4 5485.48 645.417   5
  -2   7   4 5241.24 614.460   3
  -2   7   3 28223.2 2991.26   5
  -2   7   3 29739.1 2984.66   3
  -2   7   2 519.094 339.425   5
  -2   7   2 221.334 304.502   3
  -2   7   1 6357.03 736.088   3
  -2   7   0 3615.05 527.633   3
  -2   7   0 3787.20 448.389   1
  -2   7  -1 11976.9 1245.65   3
  -2   7  -1 11401.2 1214.81   1
  -2   7  -2 996.651 221.850   2
  -2   7  -2 1005.30 279.587   1
  -2   7  -3-454.225 275.279   1
  -2   7  -3 40.1610 214.306   2
  -2   7  -4 220.139 326.978   3
  -2   7  -4 358.441 288.401   1
  -2   7  -4 236.520 232.277   2
  -2   7  -5 457.679 341.545   3
  -2   7  -5 173.580 288.451   1
  -2   7  -5 203.899 247.360   2
  -2   7  -6 3189.34 465.506   1
  -2   7  -6 3182.59 488.561   3
  -2   7  -6 3027.93 427.910   2
  -2   7  -7 559.692 317.078  15
  -2   7  -7 676.838 299.790   2
  -2   7  -7-2.49841 261.738   6
  -2   7  -7 168.585 302.310  10
  -2   7  -7 879.768 397.018   3
  -2   7  -7 378.291 345.456   1
  -2   7  -7 655.687 406.844  24
  -2   7  -8-106.938 276.453   6
  -2   7  -8 358.262 423.684   3
  -2   7  -8 66.0481 355.815  15
  -2   7  -8 467.912 472.289  24
  -2   7  -8-285.005 319.008   2
  -2   7  -8-217.403 320.226  10
  -2   7  -8-59.7692 379.276   1
  -2   7  -9 648.879 533.786  24
  -2   7  -9 1251.48 470.040   3
  -2   7  -9 643.695 366.728  10
  -2   7  -9 1401.10 321.218   6
  -2   7  -9 1787.53 389.523  15
  -2   7  -9 1126.47 413.819   1
  -2   7 -10 1292.47 319.029   6
  -2   7 -10-17.0208 519.901  24
  -2   7 -10 1128.07 371.600  10
  -2   7 -10 1555.43 457.447   3
  -2   7 -10 811.425 425.710   1
  -2   7 -11 250.649 283.135   6
  -2   7 -11 632.415 496.163  24
  -2   7 -12 420.473 461.104  30
  -2   7 -12 142.756 265.323   6
  -2   7 -12 364.671 465.783  24
  -2   7 -13 7.01785 403.742  24
  -2   7 -13 220.816 426.613  30
  -2   7 -13-364.454 243.976   6
  -2   7 -14 358.154 207.569   6
  -2   7 -14 444.716 362.365  30
  -2   7 -15-53.8856 164.341   6
  -2   7 -15 246.362 294.612  30
  -2   7 -16-136.181 207.643  30
  -2   6  21-136.902 97.1766   7
  -2   6  21 153.875 163.451  34
  -2   6  20 5.08686 161.550  24
  -2   6  20-56.0195 142.432   7
  -2   6  19-24.2498 235.847  24
  -2   6  19 91.2170 349.870  29
  -2   6  19 87.4896 167.322  14
  -2   6  19 160.619 176.540   7
  -2   6  18 112.918 209.586  14
  -2   6  17 342.859 238.514  14
  -2   6  17 495.294 424.568  34
  -2   6  16-147.674 262.657  14
  -2   6  15 565.372 288.147  14
  -2   6  15 318.026 388.695   5
  -2   6  14 1033.25 410.462   5
   2  -6 -14 870.041 407.191   2
  -2   6  13 2859.20 467.484   5
   2  -6 -13 2263.77 463.300   2
  -2   6  13 2372.72 422.094  11
  -2   6  12 550.617 359.666   5
  -2   6  12 867.362 319.518  11
  -2   6  12 400.004 284.001  14
   2  -6 -12 511.112 356.128   2
   2  -6 -11 1948.58 390.346   2
  -2   6  11 2208.50 400.840   5
  -2   6  10 225.667 313.607   5
   2  -6 -10 843.972 306.979   2
  -2   6   9 5669.57 638.178   5
   2  -6  -9 4871.55 627.723   2
  -2   6   8 22558.2 2009.09   5
   2  -6  -8 16917.8 1996.85   2
   2  -6  -7 928.660 301.413   2
  -2   6   7 745.842 328.059   5
   2  -6  -6 10329.8 1170.04   2
  -2   6   6 12647.4 1195.06   5
   2  -6  -5 1627.52 266.114   2
  -2   6   5 2215.32 310.155   3
  -2   6   5 1701.78 359.896   5
  -2   6   4 9309.77 999.734   5
  -2   6   4 9255.17 979.924   3
  -2   6   3 40693.3 4156.61   3
  -2   6   3 40646.6 4160.92   5
  -2   6   2 22709.8 2334.63   3
  -2   6   1 46440.9 4745.72   3
  -2   6   0 34501.1 3487.23   3
  -2   6   0 33808.9 3473.60   1
  -2   6  -1 34289.3 3195.91   1
  -2   6  -1 30566.3 3211.89   5
  -2   6  -1 33461.7 3210.78   3
  -2   6  -1 29179.6 3188.54   2
  -2   6  -2 8545.55 924.686   2
  -2   6  -2 7930.04 979.358   5
  -2   6  -2 9539.59 940.629   1
  -2   6  -3 4248.94 504.591   1
  -2   6  -3 3662.47 481.124   2
  -2   6  -4 4087.50 577.642   3
  -2   6  -4 4599.81 548.153   1
  -2   6  -4 4552.65 529.971   2
  -2   6  -5 13837.2 1523.30   2
  -2   6  -5 15941.8 1534.68   1
  -2   6  -5 14248.3 1544.85   3
  -2   6  -6 6659.11 735.116   3
  -2   6  -6 7055.83 720.679   1
  -2   6  -6 5291.81 700.241   2
  -2   6  -7 3929.47 526.140   3
  -2   6  -7 3665.61 505.508   1
  -2   6  -7 3215.91 478.562   2
  -2   6  -8 3829.26 524.403   1
  -2   6  -8 4477.27 560.951   3
  -2   6  -8 3668.71 503.508  15
  -2   6  -8 3477.46 476.874  10
  -2   6  -8 3361.14 503.110   2
  -2   6  -8 3694.60 580.031  24
  -2   6  -8 3310.40 456.649   6
  -2   6  -9 1285.52 417.810   3
  -2   6  -9 1697.20 502.210  24
  -2   6  -9 510.076 288.463   6
  -2   6  -9 390.408 364.506   2
  -2   6  -9 766.714 332.565  10
  -2   6  -9 653.808 397.909   1
  -2   6  -9 1283.57 369.507  15
  -2   6 -10 350.347 508.117  24
  -2   6 -10 40.0603 437.925   3
  -2   6 -10 459.018 293.852   6
  -2   6 -10 571.534 371.156   2
  -2   6 -10 795.325 414.538   1
  -2   6 -11 655.497 296.723   6
  -2   6 -11 352.921 435.390   3
  -2   6 -11 481.632 506.273  24
  -2   6 -11 335.602 426.309   1
  -2   6 -11 81.5152 374.370   2
  -2   6 -12 131.816 284.917   6
  -2   6 -12-326.794 480.598  24
  -2   6 -12-223.807 504.497  30
  -2   6 -13 380.971 262.352   6
  -2   6 -13 176.310 435.273  24
  -2   6 -13-26.0213 459.519  30
  -2   6 -14-171.250 226.996   6
  -2   6 -14 349.067 410.685  30
  -2   6 -15 432.927 349.846  30
  -2   6 -15-177.409 187.187   6
  -2   6 -16-479.263 289.460  30
  -2   6 -17 541.753 195.109  30
  -2   5  21 155.130 90.4966   7
  -2   5  21-43.7817 141.149  34
  -2   5  20-79.0843 136.985   7
  -2   5  20 54.0856 163.220  24
  -2   5  19-295.319 332.510  29
  -2   5  18-512.749 387.060  29
  -2   5  18-74.5212 195.982  14
  -2   5  17 143.508 222.531  14
   2  -5 -16-885.194 407.663  30
  -2   5  16-162.538 252.833  14
  -2   5  15 3768.55 472.702  14
   2  -5 -15 2306.50 572.429  30
  -2   5  15 3016.56 568.615   5
  -2   5  14 507.203 387.191   5
   2  -5 -14 830.948 415.602   2
  -2   5  13 2718.79 457.994   5
  -2   5  13 1699.35 357.995  14
   2  -5 -13 2293.65 455.909   2
  -2   5  12 49.6826 265.409  14
   2  -5 -12 149.544 363.275   2
   2  -5 -11-321.539 329.856   2
   2  -5 -10 305.344 322.379   2
   2  -5  -9 4548.94 575.587   2
   2  -5  -8-406.857 323.219   2
  -2   5   8 170.563 333.087   5
  -2   5   7 9659.94 1024.41   5
   2  -5  -7 9126.71 1017.84   2
   2  -5  -6 2033.96 350.509   2
  -2   5   6 1617.92 378.320   5
  -2   5   6 2181.13 293.197   3
  -2   5   5-75.9985 241.869   5
   2  -5  -5 119.540 208.982   2
   2  -5  -4-66.2963 146.556   2
  -2   5   4-90.5773 175.716   3
  -2   5   4 166.210 224.474   5
  -2   5   3 29.9197 178.978   3
  -2   5   2 6848.77 730.377   3
  -2   5   1 3571.76 422.215   3
  -2   5   0 29043.8 2795.23   5
  -2   5   0 25685.6 2779.39   2
  -2   5   0 29054.0 2783.76   1
  -2   5   0 31075.8 2795.77   3
  -2   5  -1 7608.78 765.557   1
  -2   5  -1 7230.60 793.209   5
  -2   5  -1 7067.39 758.144   2
  -2   5  -2 588.550 229.804   1
  -2   5  -2 244.469 305.958   5
  -2   5  -2 578.505 197.340   2
  -2   5  -3-3.22428 336.297   3
  -2   5  -3 450.881 253.386   2
  -2   5  -3 659.186 296.686   1
  -2   5  -4-140.896 282.389   2
  -2   5  -4-96.0146 313.667   1
  -2   5  -4-207.687 338.831   3
  -2   5  -5-378.896 289.391   2
  -2   5  -5-39.7199 304.394   1
  -2   5  -5-116.971 334.144   3
  -2   5  -6 229.457 308.848   1
  -2   5  -6 260.291 279.139   2
  -2   5  -6 242.960 327.694   3
  -2   5  -7 3667.59 495.263   2
  -2   5  -7 3897.17 528.082   3
  -2   5  -7 3873.55 514.908   1
  -2   5  -8 391.460 335.122   1
  -2   5  -8 417.345 347.650   3
  -2   5  -8 321.951 319.488   2
  -2   5  -9 419.336 390.406   3
  -2   5  -9 290.732 258.218   6
  -2   5  -9 111.544 343.076   2
  -2   5  -9 208.262 336.232  15
  -2   5  -9 596.818 378.178   1
  -2   5  -9 306.438 435.556  24
  -2   5 -10 582.920 401.778   1
  -2   5 -10 265.417 488.499  24
  -2   5 -10 454.647 277.244   6
  -2   5 -10 939.435 380.864   2
  -2   5 -10 704.761 424.320   3
  -2   5 -11 2241.58 450.768   2
  -2   5 -11 1809.58 561.313  24
  -2   5 -11 1822.03 492.375   3
  -2   5 -11 2443.33 366.668   6
  -2   5 -11 1589.58 477.340   1
  -2   5 -12 257.890 430.158   1
  -2   5 -12-94.4822 407.326   3
  -2   5 -12 204.005 284.302   6
  -2   5 -12-145.870 488.442  24
  -2   5 -12-676.602 388.241   2
  -2   5 -13-135.982 511.417  30
  -2   5 -13-305.169 456.619  24
  -2   5 -13-66.4132 273.574   6
  -2   5 -14-61.2103 239.449   6
  -2   5 -14-386.474 466.922  30
  -2   5 -15 24.0595 205.500   6
  -2   5 -16 73.0011 167.517   6
  -2   4  21-79.8555 77.3689   7
  -2   4  20 95.1882 159.411  24
  -2   4  20-49.6913 128.547   7
   2  -4 -19 376.374 269.360  30
   2  -4 -18 475.493 332.817  30
  -2   4  18-171.410 361.746  34
  -2   4  17-189.294 211.718  14
   2  -4 -17-891.990 390.816  30
  -2   4  16-95.4796 246.000  14
   2  -4 -16-622.183 425.741  30
   2  -4 -15 971.142 461.033  30
   2  -4 -15 623.563 426.598   1
   2  -4 -15 158.597 421.219   2
   2  -4 -14-127.264 457.800  30
  -2   4  14 411.028 334.182  11
   2  -4 -14 93.9986 406.946   2
  -2   4  14 116.121 273.028  14
   2  -4 -13 10221.5 1030.01   2
   2  -4 -13 9194.25 1037.81  30
  -2   4  13 10128.5 993.248  11
  -2   4  13 7716.43 967.124  14
  -2   4  12 585.146 267.172  14
   2  -4 -12 993.329 374.939   2
   2  -4 -12 596.843 415.194  30
   2  -4 -11 275.804 334.784   2
   2  -4 -10 571.429 336.228   2
   2  -4  -9 382.877 343.647   2
   2  -4  -8 1983.00 408.831   2
   2  -4  -7 244.763 343.728   2
   2  -4  -6 39058.8 3996.75   2
   2  -4  -5 2298.07 313.839   2
  -2   4   5 2049.62 323.978   5
   2  -4  -4 51150.6 5308.05   2
  -2   4   4 52970.6 5308.17   3
  -2   4   3 128253. 12721.3   3
   2  -4  -3 122962. 12718.2   2
  -2   4   2 6458.88 688.571   2
  -2   4   2 7742.79 707.963   3
  -2   4   1 83558.8 8230.12   5
  -2   4   1 79077.3 8228.92   3
  -2   4   1 80631.8 8221.24   2
  -2   4   0 17599.2 1737.64   5
  -2   4   0 15437.5 1725.28   1
  -2   4   0 17400.1 1738.23   3
  -2   4   0 17680.2 1723.77   2
  -2   4  -1 87114.7 8774.05   2
  -2   4  -1 80124.3 8780.91   5
  -2   4  -1 87809.1 8775.50   1
  -2   4  -2 11339.2 1186.18   3
  -2   4  -2 10330.5 1188.85   5
  -2   4  -2 11424.5 1170.65   2
  -2   4  -2 11963.8 1178.03   1
  -2   4  -3 588.701 258.825   3
  -2   4  -3 668.941 220.922   1
  -2   4  -3 538.351 285.831   5
  -2   4  -3 623.481 200.745   2
  -2   4  -4 239.215 258.441   2
  -2   4  -4 387.902 304.472   1
  -2   4  -4 347.147 320.738   3
  -2   4  -5 2729.85 461.472   3
  -2   4  -5 2795.30 420.228   2
  -2   4  -5 3123.08 447.278   1
  -2   4  -6 3904.69 513.925   1
  -2   4  -6 3676.48 518.999   3
  -2   4  -6 3498.59 485.562   2
  -2   4  -7 1711.50 357.084   2
  -2   4  -7 2197.96 384.122   1
  -2   4  -7 1847.59 378.936   3
  -2   4  -8 558.255 313.820   2
  -2   4  -8 570.131 332.550   3
  -2   4  -8 992.130 344.959   1
  -2   4  -9 4712.73 562.909   3
  -2   4  -9 3576.75 557.392   1
  -2   4  -9 4200.13 547.860   2
  -2   4 -10 298.620 377.798   1
  -2   4 -10 723.093 350.292  15
  -2   4 -10 235.043 362.272   2
  -2   4 -10 74.0475 252.110   6
  -2   4 -10-25.4967 461.076  24
  -2   4 -10 937.507 382.833   3
  -2   4 -11 8247.59 890.852   6
  -2   4 -11 8205.11 944.649   3
  -2   4 -11 8078.99 958.551   1
  -2   4 -11 8373.20 948.256   2
  -2   4 -11 8102.45 987.165  24
  -2   4 -12 827.163 299.989   6
  -2   4 -12 1072.46 452.174   1
  -2   4 -12 1114.52 436.936   3
  -2   4 -12 317.324 405.563   2
  -2   4 -12 1540.66 508.832  24
  -2   4 -13 1604.93 323.316   6
  -2   4 -13 1770.97 501.913  24
  -2   4 -14 396.243 252.159   6
  -2   4 -15 553.419 232.546   6
  -2   4 -16 101.336 186.799   6
  -2   4 -18-330.301 231.480  30
  -2   3  20-21.0285 119.487   7
  -2   3  20-131.404 181.820  34
   2  -3 -19 8.39860 270.963  30
  -2   3  18 11.2412 333.445  34
  -2   3  18-236.131 362.546  29
   2  -3 -17-138.069 385.136  30
   2  -3 -16-654.162 437.529  30
  -2   3  16 213.491 220.938  14
   2  -3 -15 1633.79 454.714   2
   2  -3 -15 768.051 480.256  30
   2  -3 -15 1357.13 468.260   1
   2  -3 -14 41.5962 423.204   2
  -2   3  14 451.282 340.444  11
   2  -3 -14 98.1595 464.305  30
   2  -3 -14-174.674 441.197   1
  -2   3  14-129.888 254.788  14
  -2   3  13 10.5082 314.450  11
  -2   3  13 50.0928 259.828  14
   2  -3 -13 353.697 403.539   2
   2  -3 -13-168.736 469.702  30
   2  -3 -12 20.3372 434.179  30
   2  -3 -12 390.896 381.903   2
   2  -3 -11 2354.18 434.655   2
   2  -3 -10 162.931 327.845   2
   2  -3  -9 6260.26 738.689   2
   2  -3  -8 176.959 363.610   2
   2  -3  -7 4534.77 591.093   2
   2  -3  -6 2356.94 374.827   2
   2  -3  -5 3412.31 416.683   2
   2  -3  -4 584.206 193.718   2
   2  -3  -3 1573.95 226.044   2
  -2   3   2 10316.6 1083.50   3
   2  -3  -2 10566.4 1076.62   2
  -2   3   1 11717.0 1241.00   2
  -2   3   1 13720.8 1255.98   5
  -2   3   1 12086.8 1252.46   3
  -2   3   0 1254.44 156.099   1
  -2   3   0 1440.37 225.216   5
  -2   3   0 1299.18 166.966   2
  -2   3  -1 5634.89 583.554   1
  -2   3  -1 5407.30 600.013   5
  -2   3  -1 5614.46 585.405   2
  -2   3  -2 160.462 179.808   3
  -2   3  -2 15.8458 181.504   5
  -2   3  -2 67.3077 149.992   1
  -2   3  -2-144.356 134.220   2
  -2   3  -3 39048.2 3949.68   3
  -2   3  -3 35740.0 3951.27   5
  -2   3  -3 40114.9 3944.65   2
  -2   3  -4 7068.03 770.622   2
  -2   3  -4 7570.21 788.217   3
  -2   3  -5 2167.08 371.604   3
  -2   3  -5 1669.23 326.525   2
  -2   3  -6 90.9104 311.743   2
  -2   3  -6 125.884 335.348   3
  -2   3  -7 23899.9 2615.01   2
  -2   3  -7 27237.2 2623.08   3
  -2   3  -8 15630.8 1581.77   3
  -2   3  -8 14472.8 1574.80   2
  -2   3  -9 190.127 305.143   2
  -2   3  -9 251.118 323.589   3
  -2   3 -10 1140.60 368.031   3
  -2   3 -10 1135.55 388.940   1
  -2   3 -10 1099.89 354.278   2
  -2   3 -10 475.397 425.508  24
  -2   3 -11 664.385 371.931   3
  -2   3 -11 617.995 381.664   2
  -2   3 -11 549.666 268.464   6
  -2   3 -11 773.768 409.526   1
  -2   3 -11 66.4815 450.455  24
  -2   3 -12-6.97650 434.669   1
  -2   3 -12-98.2302 477.436  24
  -2   3 -12 517.457 393.474   3
  -2   3 -12 418.568 274.652   6
  -2   3 -12 406.799 414.853   2
  -2   3 -13 126.734 276.653   6
  -2   3 -13 99.6941 412.374   2
  -2   3 -13-643.833 452.156   1
  -2   3 -13 370.185 472.239  24
  -2   3 -14-111.399 249.424   6
  -2   3 -14 96.6817 515.301  30
  -2   3 -15-540.061 472.966  30
  -2   3 -15-123.799 225.292   6
  -2   3 -16 214.405 200.086   6
  -2   3 -16-227.770 416.798  30
  -2   3 -17-620.419 365.071  30
  -2   3 -18 180.072 282.805  30
  -2   3 -19 177.526 183.386  30
  -2   2  20 161.175 105.188   7
   2  -2 -19-94.4771 266.918  30
   2  -2 -17 390.393 397.544  30
  -2   2  17-519.945 387.403  29
  -2   2  16 208.095 426.843  29
   2  -2 -16-122.120 443.815  30
   2  -2 -15 608.531 474.864  30
   2  -2 -14 894.129 493.072  30
   2  -2 -14 1413.19 460.341   2
   2  -2 -14 1559.84 461.911   1
  -2   2  14 426.183 331.323  11
   2  -2 -13 3094.62 525.981   2
  -2   2  13 2398.67 424.740  11
   2  -2 -13 2723.26 570.664  30
   2  -2 -13 2666.71 519.040   1
   2  -2 -12 1500.73 506.178  30
   2  -2 -12 2793.69 460.011   2
   2  -2 -11 7368.65 853.954   2
   2  -2 -10 6422.98 751.786   2
   2  -2  -9 27748.9 2865.88   2
   2  -2  -8 9447.05 1043.45   2
   2  -2  -7 45975.3 4708.78   2
   2  -2  -6 2783.73 405.097   2
   2  -2  -5 37583.1 3842.46   2
   2  -2  -4 713.787 207.092   2
   2  -2  -3 2879.10 359.485   2
  -2   2   2 2109.72 273.596   5
   2  -2  -2 1787.68 266.359   2
  -2   2   1 8346.02 871.973   5
  -2   2   0 443.312 171.688   5
  -2   2   0 373.985 129.503   2
  -2   2  -1 203742. 20800.2   2
  -2   2  -1 207139. 20803.2   3
  -2   2  -1 202384. 20803.0   5
  -2   2  -2 194940. 19769.5   5
  -2   2  -2 194405. 19766.7   2
  -2   2  -2 192761. 19769.4   3
  -2   2  -3 3974.86 434.342   2
  -2   2  -3 3851.00 452.067   5
  -2   2  -3 4005.78 445.558   3
  -2   2  -4 1199.25 223.151   3
  -2   2  -4 918.948 205.189   2
  -2   2  -5 1759.78 277.194   2
  -2   2  -5 1675.28 302.443   3
  -2   2  -6 5550.70 627.074   3
  -2   2  -6 4970.12 605.801   2
  -2   2  -7 5322.50 677.727   2
  -2   2  -7 6265.49 691.901   3
  -2   2  -8 3639.44 519.618   2
  -2   2  -8 4427.90 541.163   3
  -2   2  -9 2954.45 422.915   3
  -2   2  -9 2301.68 409.021   2
  -2   2 -10 7758.09 763.462   3
  -2   2 -10 5509.91 760.440   2
  -2   2 -11 2365.98 356.455   6
  -2   2 -11 2322.87 452.630   2
  -2   2 -11 2756.83 443.866   3
  -2   2 -11 2915.82 505.353  24
  -2   2 -12 8420.25 1033.02  24
   2  -2  12 7018.63 966.718  11
  -2   2 -12 9549.98 952.832   6
  -2   2 -12 11023.9 1039.17   1
  -2   2 -12 9680.89 1018.48   2
  -2   2 -13 1227.14 280.695   6
  -2   2 -13 1545.62 479.080  24
  -2   2 -13 813.356 443.375   2
  -2   2 -13 756.054 454.476   1
  -2   2 -14 356.685 413.848   2
  -2   2 -14 39.2701 257.396   6
  -2   2 -14 650.916 451.291   1
  -2   2 -15 607.539 501.541  30
  -2   2 -15 103.263 232.984   6
   2  -2  16 49.9652 245.510  11
  -2   2 -16 592.112 449.612  30
  -2   2 -17-21.5465 396.148  30
  -2   2 -18 342.632 322.949  30
  -2   2 -19 251.822 243.459  30
   2  -1 -19 166.985 247.104  30
   2  -1 -18-351.668 324.826  30
   2  -1 -17-50.0262 379.567  30
  -2   1  16 388.125 407.392  29
   2  -1 -16 847.727 442.830  30
   2  -1 -15-951.896 475.028  30
  -2   1  15-51.2557 435.337  29
  -2   1  14 217.611 311.928  11
   2  -1 -14 7.25132 446.957   2
   2  -1 -14 132.615 427.100   1
   2  -1 -14 270.967 502.238  30
   2  -1 -13 3812.51 714.288  30
  -2   1  13 4471.75 603.879  11
   2  -1 -13 5687.11 691.963   2
   2  -1 -13 6051.77 694.851   1
   2  -1 -12 1379.06 485.818  30
   2  -1 -12 829.834 408.679   2
   2  -1 -12 965.408 426.983   1
   2  -1 -11 188.213 368.555   2
   2  -1 -10 5041.69 633.659   2
   2  -1  -9 1435.91 377.144   2
   2  -1  -8 9109.77 1012.17   2
   2  -1  -7 9993.72 1097.14   2
   2  -1  -6 276.907 288.598   2
   2  -1  -5 1381.88 275.684   2
   2  -1  -4 619.628 210.892   2
   2  -1  -3 5477.56 600.616   2
   2  -1  -2 450.743 193.910   2
   2  -1  -1 686.811 164.852   2
  -2   1   0 22371.6 2305.33   5
  -2   1   0 22721.7 2303.71   2
  -2   1  -1 2504.81 301.029   3
  -2   1  -1 2560.11 298.467   5
   2  -1   1 2374.79 270.846   4
  -2   1  -1 2925.56 291.581   2
   2  -1   2 26418.1 2817.76   4
  -2   1  -2 28124.6 2821.92   5
  -2   1  -2 27674.3 2821.85   3
  -2   1  -2 28835.1 2820.09   2
  -2   1  -3 1597.19 246.727   2
  -2   1  -3 1761.00 266.502   5
  -2   1  -3 1702.28 257.988   3
  -2   1  -4 7145.79 767.992   3
  -2   1  -4 7354.66 764.029   2
  -2   1  -5 749.120 196.204   2
  -2   1  -5 720.343 219.721   3
  -2   1  -6-38.5033 230.708   2
  -2   1  -6-104.505 261.574   3
  -2   1  -7 21521.1 2026.58   3
  -2   1  -7 17877.8 2019.40   2
  -2   1  -8-399.286 333.359   3
  -2   1  -8 238.016 300.960   2
  -2   1  -9 412.181 312.554   2
  -2   1  -9 369.202 317.554   3
  -2   1 -10-249.473 297.346   3
  -2   1 -10 135.240 303.268   2
  -2   1 -11 203.889 334.484   2
  -2   1 -11-430.961 326.262   3
  -2   1 -12-344.013 420.382  24
  -2   1 -12 460.631 375.957   2
   2  -1  13 1947.38 397.886  11
  -2   1 -13 3070.18 493.562   2
  -2   1 -14 203.068 451.850   1
  -2   1 -14 262.393 422.729   2
  -2   1 -15-134.434 499.173  30
  -2   1 -16 264.081 486.534  30
  -2   1 -17 93.6938 426.086  30
   2  -1  17-2.34555 231.263  11
  -2   1 -18 768.789 362.781  30
  -2   1 -19 57.4621 283.784  30
  -2   1 -20 121.305 181.172  30
   2   0 -19 466.749 227.978  30
   2   0 -17 27.2716 367.016  30
  -2   0  17-249.278 300.316  34
   2   0 -16-258.055 446.448  30
  -2   0  15 107.664 404.530  29
   2   0 -15 187.805 488.632  30
   2   0 -14 3349.49 545.698   2
   2   0 -14 3000.91 593.851  30
   2   0 -14 2630.38 557.648   1
   2   0 -13 357.138 440.776   1
  -2   0  13 276.843 297.994  11
   2   0 -13-428.698 502.545  30
   2   0 -13 149.280 420.036   2
   2   0 -12 2347.72 494.708   1
   2   0 -12 2449.16 546.480  30
   2   0 -12 2010.30 489.286   2
   2   0 -11 826.601 391.069   1
   2   0 -11 211.830 461.436  30
   2   0 -11 500.528 373.604   2
   2   0 -10 1198.72 364.657   2
   2   0  -9 401.574 338.005   2
   2   0  -8 1660.78 397.775   2
   2   0  -7 6224.64 741.595   2
   2   0  -6 4747.05 588.529   2
   2   0  -5 10591.2 1114.72   2
   2   0  -4 37864.3 3870.22   2
   2   0  -3 5.32551 206.780   2
   2   0  -2 366063. 37278.0   2
   2   0  -1 19509.2 1957.53   1
   2   0  -1 18686.7 1959.47   2
   2   0   0 29118.0 2949.85   2
   2   0   0 28812.7 2947.72   1
  -2   0  -1 58981.4 5873.75   5
   2   0   1 56455.4 5873.43   4
  -2   0  -2 78397.5 7767.55   5
   2   0   2 77582.1 7767.54   4
  -2   0  -2 72207.4 7768.17   3
  -2   0  -3 685.084 184.702   3
   2   0   3 604.353 172.945   4
  -2   0  -4 13330.3 1340.85   3
   2   0   4 12656.1 1341.68   4
  -2   0  -5 1519.14 230.557   3
  -2   0  -6 15525.5 1601.69   3
  -2   0  -7 835.390 288.850   3
  -2   0  -8 1684.41 367.837   3
  -2   0  -9 4850.83 592.462   3
  -2   0 -10 19541.9 2023.97   3
  -2   0 -11 2126.91 376.219   3
   2   0  13-304.824 323.648  11
  -2   0 -15-152.772 438.356   1
  -2   0 -15-62.3572 525.772  30
  -2   0 -16-518.186 481.505  30
   2   0  16-78.2947 296.663  11
  -2   0 -17 527.017 439.697  30
  -2   0 -18 456.478 378.486  30
  -2   0 -19-187.949 307.439  30
   2   0  20-18.6006 178.129  34
  -2   0 -20 18.7825 225.432  30
   2   1 -19 406.598 185.776  30
  -2  -1  19 5.59807 85.4557   7
   2   1 -17-293.765 351.827  30
   2   1 -16-308.423 419.571  30
   2   1 -15 179.027 476.621  30
   2   1 -14 9.62044 486.391  30
   2   1 -13 2871.65 543.379   1
   2   1 -13 1992.79 601.463  30
   2   1 -13 3158.09 530.042   2
   2   1 -12 625.085 433.357   1
  -2  -1  12 66.9772 421.060  29
   2   1 -12 670.311 252.036   6
   2   1 -12 282.162 420.849   2
  -2  -1  12 271.835 290.975  11
   2   1 -12-119.257 508.031  30
   2   1 -11 1749.62 421.356   1
   2   1 -11 861.697 251.436   6
   2   1 -11 1340.20 484.475  30
   2   1 -10-219.111 353.918   1
   2   1 -10 275.212 349.233   2
   2   1  -9 16159.7 1692.24   1
   2   1  -9 15916.1 1688.98   2
   2   1  -8 554.319 336.939   2
   2   1  -7 4146.72 555.236   2
   2   1  -6 450.495 344.966   2
   2   1  -5 12050.0 1267.08   2
   2   1  -4 419.220 222.628   2
   2   1  -3 1331.48 254.338   2
   2   1  -2 171.716 217.456   1
   2   1  -2 454.104 221.763   2
   2   1  -1 485.001 182.526   1
   2   1  -1 230.957 185.821   2
   2   1   0 4037.08 428.862   2
   2   1   0 3930.37 426.083   1
   2   1   1 179.856 92.7308   4
   2   1   1 102.688 101.003   1
  -2  -1  -1 281.704 100.974   2
  -2  -1  -2 1860.47 226.732   2
   2   1   2 1714.63 215.250   4
  -2  -1  -2 1723.98 192.181   5
  -2  -1  -3 20644.1 2027.23   2
   2   1   3 19725.9 2026.31   4
  -2  -1  -3 19213.6 2024.71   3
   2   1   4 30585.6 2965.65   4
  -2  -1  -4 28300.3 2960.89   3
  -2  -1  -4 28589.0 2964.13   2
   2   1   5 65.1682 174.752   4
  -2  -1  -5-50.5721 175.442   2
  -2  -1  -5-151.392 146.994   3
  -2  -1  -6 1399.81 235.419   2
  -2  -1  -6 1281.85 214.476   3
  -2  -1  -7 7250.36 816.192   2
  -2  -1  -7 7859.99 809.557   3
  -2  -1  -8-36.5599 304.523   2
  -2  -1  -8-2.18601 296.205   3
  -2  -1  -9 12230.4 1497.58   2
  -2  -1  -9 16141.5 1494.85   3
  -2  -1 -10 5.61999 271.686   3
  -2  -1 -10-310.012 305.062   2
  -2  -1 -11 101.824 303.288   2
  -2  -1 -12 1900.21 391.899   2
  -2  -1 -13 77.8513 376.508   2
   2   1  14 221.981 333.197  11
  -2  -1 -14 322.965 407.514   2
  -2  -1 -15 440.081 434.096   2
  -2  -1 -15 348.992 502.689  30
  -2  -1 -16 745.414 509.790  30
  -2  -1 -17 283.452 447.830  30
  -2  -1 -18 191.938 406.376  30
   2   1  18 124.922 251.118  11
  -2  -1 -19-136.438 330.412  30
  -2  -1 -20 566.856 263.299  30
   2   2 -17 36.7614 322.431  30
   2   2 -16 166.557 398.747  30
   2   2 -15 47.0224 439.492  30
   2   2 -14 4335.45 673.924  30
   2   2 -13 497.999 451.013   1
   2   2 -13 515.673 518.529  30
   2   2 -13 278.688 245.948   6
   2   2 -12 14363.3 1357.84   6
   2   2 -12 12201.4 1440.95  30
   2   2 -12 15856.8 1437.64   1
  -2  -2  12 10664.4 1363.12  11
  -2  -2  11 196.869 273.420  11
   2   2 -11 481.336 257.855   6
   2   2 -11 214.038 490.199  30
   2   2 -11 447.131 410.129   1
   2   2 -10 6201.41 807.059  30
   2   2 -10 6493.98 775.118   1
   2   2  -9-201.571 334.404   1
   2   2  -8 7208.68 826.903   1
   2   2  -7 9428.02 1038.30   1
   2   2  -6 12455.4 1335.45   1
   2   2  -5 14149.3 1486.31   1
   2   2  -4 16642.0 1776.87   3
   2   2  -4 17611.7 1774.46   1
   2   2  -3 10366.3 1047.35   3
   2   2  -3 9551.23 1044.01   1
   2   2  -2 15378.3 1651.70   3
   2   2  -2 16595.3 1651.33   1
   2   2  -1 1722.59 275.081   1
   2   2   0 128498. 13089.3   1
   2   2   1 8859.42 915.630   1
   2   2   2 283993. 28971.1   4
  -2  -2  -2 284938. 28970.6   2
   2   2   3 165168. 16727.6   4
  -2  -2  -3 163424. 16726.8   2
  -2  -2  -4 99231.6 10388.2   3
   2   2   4 108159. 10393.4   4
  -2  -2  -4 102925. 10391.9   2
  -2  -2  -5 6793.34 727.558   3
   2   2   5 7049.30 743.932   4
  -2  -2  -5 7357.02 739.443   2
   2   2   6 17067.1 1920.69   4
  -2  -2  -6 18815.6 1918.50   2
  -2  -2  -6 19408.0 1911.33   3
  -2  -2  -7 3915.73 453.913   3
  -2  -2  -7 4250.12 472.944   2
  -2  -2  -8 2410.95 325.933   3
  -2  -2  -8 1319.86 348.520   2
  -2  -2  -9 3403.89 495.939   2
  -2  -2  -9 4094.86 477.464   3
  -2  -2 -10 1000.67 317.187   2
  -2  -2 -11 12676.6 1346.61   2
  -2  -2 -12 2739.10 434.718   2
  -2  -2 -13 996.660 385.450   2
  -2  -2 -14 409.182 409.006   2
   2   2  14 159.080 336.852  11
  -2  -2 -15 1131.98 443.888   2
  -2  -2 -15 1231.43 524.682  30
  -2  -2 -16 195.093 493.147  30
   2   2  17 1614.14 355.075  11
  -2  -2 -17 1304.97 488.544  30
  -2  -2 -18-631.814 417.158  30
  -2  -2 -19 325.630 358.086  30
   2   2  19 885.164 194.400  14
  -2  -2 -20 541.297 284.446  30
   2   2  21 143.195 178.991  34
   2   3 -18 248.747 196.765  30
   2   3 -17 232.624 285.221  30
   2   3 -16-324.663 352.646  30
   2   3 -15 55.6133 429.473  30
   2   3 -15-69.1270 252.845  16
   2   3 -14 31.6592 465.223  30
   2   3 -13 183.916 498.397  30
   2   3 -13-19.2347 258.770   6
   2   3 -12-409.607 266.798   6
   2   3 -12-191.505 526.686  30
   2   3 -12 91.6018 452.303   1
   2   3 -12 21.3232 424.450   2
   2   3 -11-14.4459 422.416   1
   2   3 -11 85.9568 270.391   6
   2   3 -11-121.836 419.207   2
   2   3 -10 997.430 276.448   6
   2   3 -10 656.193 399.882   2
   2   3 -10 1031.67 415.072   1
   2   3 -10 838.125 314.810  10
   2   3  -9 1624.80 404.934   2
   2   3  -9 1794.36 413.112   1
   2   3  -8 599.158 331.148   2
   2   3  -8 256.125 338.025   1
   2   3  -7 1679.21 371.894   1
   2   3  -7 1191.31 372.249   2
   2   3  -6 1380.67 387.090   2
   2   3  -6 1639.97 400.155   1
   2   3  -6 2358.67 431.928   3
   2   3  -5 19846.8 2082.05   1
   2   3  -5 20108.0 2082.05   2
   2   3  -5 20122.8 2090.10   3
   2   3  -4 3542.03 460.425   3
   2   3  -4 3126.37 447.004   1
   2   3  -4 3114.95 447.823   2
   2   3  -3 242.415 248.039   3
   2   3  -3-2.62101 228.324   1
   2   3  -3-76.4350 217.783   2
   2   3  -2-93.4854 201.702   2
   2   3  -2 190.665 212.160   1
   2   3  -2 239.706 223.356   3
   2   3  -1-110.583 222.865   3
   2   3  -1-18.5616 202.167   1
   2   3  -1-163.081 204.048   2
   2   3   0 320.476 206.719   1
   2   3   0 535.263 201.967   2
   2   3   1 1079.24 208.699   1
  -2  -3  -2 11295.8 1176.01   2
   2   3   2 11602.9 1180.96   1
   2   3   3 953.436 203.810   4
  -2  -3  -3 1225.97 201.486   2
   2   3   4 19935.1 2131.71   4
  -2  -3  -4 21538.5 2129.76   2
   2   3   5 4550.73 459.518   4
  -2  -3  -5 4868.04 456.960   2
  -2  -3  -5 3812.83 428.241   3
   2   3   6 4181.45 519.601   4
  -2  -3  -6 4758.95 484.520   3
  -2  -3  -6 4571.05 509.850   2
  -2  -3  -7 2962.24 331.099   3
   2   3   7 2679.78 389.444   4
  -2  -3  -7 3042.70 373.481   2
  -2  -3  -8 3285.72 444.715   2
  -2  -3  -9 463.022 311.861   2
  -2  -3 -10 1705.55 353.003   2
  -2  -3 -11 1593.54 353.499   2
  -2  -3 -12 1260.00 350.726   2
  -2  -3 -13 3594.46 520.276   2
   2   3  14 793.821 346.788  11
  -2  -3 -14 1247.53 409.023   2
  -2  -3 -15 274.072 410.890   2
  -2  -3 -15-505.167 487.090  30
  -2  -3 -16 484.421 488.590  30
  -2  -3 -16 907.967 441.039   2
   2   3  17-48.9206 319.695  11
  -2  -3 -17 652.496 446.539  30
  -2  -3 -18-498.068 408.748  30
   2   3  19 196.740 201.950  14
  -2  -3 -19 373.796 353.679  30
   2   3  19-55.3822 242.994  11
   2   3  20 539.367 153.567  14
  -2  -3 -20-327.004 284.607  30
   2   4 -14-263.009 264.689  16
  -2  -4  13-62.9152 343.287  23
   2   4 -13-627.543 261.213   6
   2   4 -12 558.618 270.457   6
   2   4 -12-359.841 424.145   2
   2   4 -11 1622.52 314.307   6
   2   4 -11 871.152 348.166  10
   2   4 -11 1436.19 445.501   2
   2   4 -10 445.468 402.753   2
   2   4 -10-163.126 475.222  24
   2   4 -10 166.777 503.185  30
   2   4 -10-195.288 318.950  10
   2   4 -10-257.225 279.282   6
   2   4  -9 3321.57 556.595  24
   2   4  -9 3672.23 456.547  10
   2   4  -9 2897.84 418.724   6
   2   4  -9 3875.38 577.758  30
   2   4  -9 2302.08 498.280   2
   2   4  -8-111.653 343.366   2
   2   4  -7 14492.5 1529.19   2
   2   4  -6 646.339 359.088   3
   2   4  -6 551.828 331.548   2
   2   4  -5 30748.5 3004.87   3
   2   4  -5 28076.4 2997.24   1
   2   4  -5 28728.2 2996.29   2
   2   4  -4 254.253 366.474   3
   2   4  -4-27.5996 345.048   2
   2   4  -3 20232.2 2107.75   2
   2   4  -3 20672.1 2114.76   3
   2   4  -2 13548.4 1360.76   2
   2   4  -2 12517.9 1368.24   3
   2   4  -1 7977.68 843.724   2
   2   4   0 32377.6 3307.29   2
   2   4   1 58865.5 6013.81   2
   2   4   1 59243.9 6019.00   3
  -2  -4  -2 64518.1 6574.96   2
  -2  -4  -3 7903.59 786.287   2
   2   4   3 7306.66 775.066   5
  -2  -4  -4 9517.44 957.790   2
   2   4   4 9130.99 947.072   5
   2   4   5 36622.3 3821.22   5
  -2  -4  -5 39377.3 3826.30   2
  -2  -4  -6 139.999 177.160   2
  -2  -4  -7 6922.27 709.433   2
   2   4   7 6092.82 718.548   4
  -2  -4  -8 1197.53 298.829   2
   2   4   8 708.725 324.455   4
  -2  -4  -9 12515.9 1319.30   2
  -2  -4 -10 291.113 302.910   2
  -2  -4 -11 9479.59 1027.32   2
  -2  -4 -12 3651.56 497.011   2
  -2  -4 -13 381.635 344.024   2
   2   4  14 482.089 337.601  11
  -2  -4 -14 499.663 457.152  30
  -2  -4 -14 713.571 392.848   2
  -2  -4 -15 3162.53 597.305  30
  -2  -4 -15 3708.92 557.658   2
  -2  -4 -16 254.279 426.861   2
  -2  -4 -16-576.171 469.593  30
   2   4  17 1274.42 359.221  11
  -2  -4 -17 818.667 460.342  30
  -2  -4 -18 412.694 403.932  30
  -2  -4 -19-254.138 353.428  30
   2   4  19 211.160 270.361  11
   2   4  19 527.420 214.048  14
  -2  -4 -20-369.445 285.419  30
   2   5 -13 948.260 464.615  30
  -2  -5  13 658.115 342.554  23
   2   5 -13 764.688 253.887   6
   2   5 -12 995.575 502.156  30
   2   5 -12 473.945 277.580   6
   2   5 -12 98.8566 294.332  10
   2   5 -12-49.6947 290.394  16
   2   5 -11-650.560 426.155   2
   2   5 -11 213.423 289.337   6
   2   5 -11-183.668 322.956  10
   2   5 -11 264.293 507.448  30
   2   5 -10 625.725 486.016  24
   2   5 -10-885.161 502.882  30
   2   5 -10 93.0597 289.895   6
   2   5 -10 600.320 340.766  10
   2   5 -10-184.267 398.920   2
   2   5  -9 177.475 373.005   2
   2   5  -9 818.959 280.633   6
   2   5  -9-182.917 484.416  30
   2   5  -9 401.218 337.997  10
   2   5  -8 788.085 447.353  30
   2   5  -8 736.683 360.767   2
   2   5  -8 676.136 266.090   6
   2   5  -8 309.678 325.853  10
   2   5  -7 2910.55 452.434   2
   2   5  -6 3314.36 463.463   2
   2   5  -6 2959.69 490.848   3
   2   5  -5 15.3564 332.432   2
   2   5  -5 273.924 365.463   3
   2   5  -4 2481.58 448.510   2
   2   5  -4 3332.23 495.948   3
   2   5  -3 1933.85 420.869   3
   2   5  -3 1381.97 376.543   2
   2   5  -2 2664.46 434.703   3
   2   5  -2 3027.84 404.743   2
   2   5  -1 22.5806 221.325   2
   2   5   0 98.1243 180.209   2
   2   5   0 177.455 242.170   3
   2   5   1 2314.06 307.386   3
   2   5   1 1865.42 256.292   2
  -2  -5  -2 9258.14 955.860   2
   2   5   2 9016.21 969.923   3
   2   5   2 9394.25 963.125   4
   2   5   3 7983.69 873.448   4
   2   5   3 8115.22 867.947   5
  -2  -5  -3 9085.19 873.358   2
  -2  -5  -4 4721.72 499.396   2
   2   5   4 4649.26 509.062   4
   2   5   4 4618.89 492.198   5
   2   5   5 1293.49 178.163   5
   2   5   5 1325.92 223.327   4
  -2  -5  -5 1289.03 205.352   2
  -2  -5  -6 168.538 177.622   2
   2   5   6-4.08260 127.630   5
  -2  -5  -7 2707.01 349.157   2
   2   5   7 2492.69 314.126   5
  -2  -5  -8-2.40167 288.393   2
  -2  -5  -9 619.964 311.845   2
  -2  -5 -10 429.133 295.251   2
  -2  -5 -11 277.193 293.962   2
  -2  -5 -12 1309.02 336.354   2
  -2  -5 -13 619.652 338.747   2
  -2  -5 -14 28.7740 378.362   2
   2   5  15 290.500 247.671  12
  -2  -5 -15 770.608 399.457   2
  -2  -5 -16-403.008 424.145   2
  -2  -5 -17 277.224 436.668  30
   2   5  17 1450.42 362.663  11
   2   5  19-276.999 275.804  11
   2   5  19 134.021 230.168  14
   2   5  21 272.614 148.115  14
   2   6 -15 364.719 298.062  30
   2   6 -14-594.372 360.658  30
   2   6 -13 1565.08 264.195   6
   2   6 -13 1589.70 442.110  30
   2   6 -12 853.147 303.511  10
   2   6 -12 495.745 462.430  30
   2   6 -12 1137.28 283.723   6
   2   6 -11 4385.69 501.859   6
   2   6 -11 3927.51 521.799  10
   2   6 -11 2719.63 642.406  30
   2   6 -10 179.743 353.059  10
   2   6 -10-271.822 407.748   2
   2   6 -10-93.3546 301.080   6
   2   6 -10 353.961 498.063  24
   2   6 -10 438.939 458.503   1
   2   6 -10-553.337 491.158  30
   2   6  -9 249.902 493.164  30
   2   6  -9 156.832 394.040   2
   2   6  -9 1235.57 363.663  10
   2   6  -9 859.821 303.936   6
   2   6  -9 618.543 453.941   1
   2   6  -8-145.250 480.514  30
   2   6  -8-433.799 402.017   1
   2   6  -8 393.588 352.701  10
   2   6  -8 168.089 373.327   2
   2   6  -8 112.165 276.770   6
   2   6  -7 78.8623 335.045   2
   2   6  -7 314.483 258.215   6
   2   6  -7 137.868 368.014   1
   2   6  -6 129.631 331.733   1
   2   6  -6 590.692 315.491   2
   2   6  -6 366.910 368.849   3
   2   6  -5 9292.45 980.615   2
   2   6  -5 8663.66 1006.95   3
   2   6  -5 8895.87 998.791   1
   2   6  -4 86.9833 365.913   3
   2   6  -4 566.262 356.074   1
   2   6  -4 516.651 317.996   2
   2   6  -3 7588.89 881.752   2
   2   6  -3 8303.39 907.360   1
   2   6  -3 8149.41 915.066   3
   2   6  -2 333.751 347.733   2
   2   6  -2 1541.48 365.158   1
   2   6  -1 85257.1 8623.51   2
   2   6  -1 83577.2 8628.87   1
   2   6   0 40888.9 3993.51   1
   2   6   0 39598.6 3986.72   2
   2   6   0 35897.5 3996.32   3
   2   6   1 11649.4 1262.58   3
   2   6   1 12484.9 1253.34   1
   2   6   1 11905.4 1247.26   4
  -2  -6  -2 9148.47 1019.39   2
   2   6   2 10446.0 1028.79   4
   2   6   2 10388.7 1035.11   1
   2   6   2 10086.4 1039.07   3
   2   6   3 27524.0 2953.09   3
   2   6   3 27017.3 2950.04   5
   2   6   3 29630.3 2951.99   4
  -2  -6  -3 30903.3 2949.03   2
   2   6   4 1239.52 206.650   5
   2   6   4 1406.17 227.937   4
  -2  -6  -4 1333.73 198.752   2
  -2  -6  -5 1088.53 199.818   2
   2   6   5 1228.54 192.980   5
   2   6   5 1317.52 227.814   4
  -2  -6  -6 8037.36 865.954   2
   2   6   6 8299.47 853.717   5
   2   6   6 8171.22 874.291   4
  -2  -6  -7 845.435 251.202   2
   2   6   7 595.231 190.643   5
   2   6   7 337.994 275.136   4
   2   6   8 25.6775 208.412   5
  -2  -6  -8-67.1918 281.650   2
   2   6   8 178.172 328.567   4
   2   6   9 491.092 355.816   4
  -2  -6  -9 934.708 305.628   2
   2   6   9 799.989 246.942   5
  -2  -6 -10 1007.75 309.902   2
   2   6  10 1002.15 253.407   5
   2   6  11 10025.3 1029.86   5
  -2  -6 -11 9281.77 1046.36   2
  -2  -6 -12 289.509 291.593   2
   2   6  12-20.0255 240.312   5
  -2  -6 -13 7048.13 815.711   2
   2   6  13 7244.21 805.308  11
  -2  -6 -14 590.088 376.422   2
   2   6  15 1348.82 330.740  12
  -2  -6 -15 2763.91 449.354   2
   2   6  16 2321.65 450.087  12
  -2  -6 -16 6091.35 571.389   2
   2   6  17-322.548 239.608  12
   2   6  19 42.8741 243.210  14
   2   6  19 317.253 283.066  11
   2   6  21 105.088 163.456  14
   2   6  22 287.092 102.618  14
   2   6  22-155.341 117.346   7
   2   7 -14-122.578 302.537  30
   2   7 -13 316.408 362.873  30
  -2  -7  13-148.970 300.725  23
   2   7 -13 528.906 213.900   6
   2   7 -12-23.5494 421.291  30
   2   7 -12 31.8146 278.423  10
   2   7 -12-134.861 245.809   6
   2   7 -11 772.393 331.176  10
   2   7 -11 450.913 458.106  30
   2   7 -11 1381.13 294.047   6
   2   7 -10 447.734 353.411  10
   2   7 -10 181.222 495.240  30
   2   7 -10 962.335 304.176   6
   2   7  -9 909.102 388.416   2
   2   7  -9 215.911 443.356   1
   2   7  -9 339.048 502.004  30
   2   7  -9 150.355 304.112   6
   2   7  -9 663.886 367.417  10
   2   7  -8 47.6194 370.699   2
   2   7  -8 503.414 296.666   6
   2   7  -8 160.806 378.370  10
   2   7  -8 304.460 465.894  30
   2   7  -8 633.501 434.247   1
   2   7  -7 1126.64 412.752   1
   2   7  -7 212.565 285.404   6
   2   7  -7 549.578 357.593   2
   2   7  -7-260.230 462.581  30
   2   7  -7 1128.75 353.987  10
   2   7  -7 600.973 471.518  24
   2   7  -6 592.594 375.936   1
   2   7  -6 121.676 332.155  10
   2   7  -6-183.155 418.077  24
   2   7  -6-255.587 257.332   6
   2   7  -6 246.747 390.233   3
   2   7  -6-78.7426 325.853   2
   2   7  -5-34.9859 298.210   2
   2   7  -5 79.4882 365.542   3
   2   7  -5-418.207 341.057   1
   2   7  -4 272.394 293.769   2
   2   7  -4-150.112 352.501   3
   2   7  -4 250.651 336.385   1
   2   7  -3 2567.20 438.574   1
   2   7  -3 2379.15 401.584   2
   2   7  -2 836.428 324.561   2
   2   7  -2 896.356 373.470   1
   2   7  -1 2067.97 488.504   3
   2   7  -1 2546.64 402.997   2
   2   7  -1 3006.70 449.909   1
   2   7   0-82.3612 390.338   3
   2   7   0 87.8327 278.743   2
   2   7   0-229.333 333.100   1
   2   7   1 5.53018 290.811   1
   2   7   1 98.9248 249.776   4
   2   7   1 118.540 344.030   3
   2   7   2 221.726 268.457   1
  -2  -7  -2 355.870 185.736   2
   2   7   2 199.082 312.341   3
   2   7   2 161.280 222.815   4
   2   7   3 364.961 275.523   3
   2   7   3 164.936 248.286   5
   2   7   3 239.095 212.685   4
  -2  -7  -3 468.192 188.153   2
  -2  -7  -4-4.63408 161.398   2
   2   7   4-129.334 214.242   4
   2   7   4 21.1665 230.861   5
  -2  -7  -5 3303.08 395.771   2
   2   7   5 3470.75 408.476   5
   2   7   5 3599.81 428.140   4
  -2  -7  -6 3133.13 409.434   2
   2   7   6 3457.24 406.863   5
   2   7   6 3426.01 441.500   4
  -2  -7  -7 1759.79 300.990   2
   2   7   7 1642.11 279.738   5
   2   7   7 1253.79 352.153   4
  -2  -7  -8 635.555 272.282   2
   2   7   8 557.821 226.075   5
   2   7   8 316.571 316.135   4
  -2  -7  -9 485.692 275.729   2
   2   7   9 103.836 335.428   4
   2   7   9 251.651 218.598   5
   2   7  10-4.52817 217.551   5
  -2  -7 -10 54.2415 262.983   2
  -2  -7 -11-32.5416 275.342   2
   2   7  11 10.4949 214.137   5
  -2  -7 -12 317.327 293.690   2
   2   7  13 808.337 307.796  11
  -2  -7 -13 265.581 325.762   2
   2   7  13 613.408 265.827  12
  -2  -7 -14-225.493 347.552   2
   2   7  14 121.658 409.874  29
   2   7  15 549.343 306.417  12
  -2  -7 -15 1314.24 397.704   2
   2   7  16 158.611 269.989  12
  -2  -7 -16 163.279 396.506   2
   2   7  17 872.135 348.454  11
   2   7  17-268.647 269.256  12
   2   7  18 234.139 279.762  14
   2   7  19-400.174 253.875  14
   2   7  21 93.3026 170.031  14
   2   7  21 340.195 271.828  29
   2   7  22-83.1699 118.005  14
   2   7  22 118.910 119.492   7
  -2  -8  13-582.974 256.855  23
   2   8 -13 539.823 310.628  30
   2   8 -12 777.831 375.255  30
   2   8 -12 180.194 244.046  10
   2   8 -12 235.071 222.346   6
  -2  -8  12 38.3261 356.051  23
   2   8 -11 2255.31 348.976   6
   2   8 -11 2543.54 373.893  10
   2   8 -10 609.755 288.134   6
   2   8 -10 511.261 344.333  10
   2   8 -10-394.462 440.018  30
   2   8  -9 3538.62 577.260   1
   2   8  -9 3842.24 466.061   6
   2   8  -9 2110.71 592.320  30
   2   8  -9 3415.35 509.979  10
   2   8  -8 93.8578 503.590  24
   2   8  -8 564.200 446.951   1
   2   8  -8 418.816 310.698   6
   2   8  -8 914.624 382.841  10
   2   8  -8 400.987 382.006   2
   2   8  -8 400.175 466.533  30
   2   8  -7 806.741 307.300   6
   2   8  -7 774.327 429.842   1
   2   8  -7 333.633 359.547   2
   2   8  -7 506.346 460.136  30
   2   8  -7 309.747 503.311  24
   2   8  -7 260.008 392.818  10
   2   8  -6 151.887 471.498  24
   2   8  -6 95.8921 433.741  30
   2   8  -6 127.807 333.021   2
   2   8  -6 215.545 394.769   1
   2   8  -6 322.655 353.345  10
   2   8  -5 12.5100 331.729  10
   2   8  -5-262.396 304.625   2
   2   8  -5 189.145 403.098   3
   2   8  -5 212.033 409.361  24
   2   8  -5 99.1572 368.963   1
   2   8  -4 926.988 299.272   2
   2   8  -4 1288.11 361.604   1
   2   8  -4 319.596 381.681   3
   2   8  -3 222.000 282.883   2
   2   8  -3 242.304 326.801   1
   2   8  -2 3604.46 477.982   2
   2   8  -2 3901.83 513.327   1
   2   8  -1 356.459 270.828   2
   2   8  -1-131.129 336.284   1
   2   8  -1 186.009 382.465   3
   2   8   0 16231.1 1666.12   3
   2   8   0 15117.7 1630.46   2
   2   8   0 18018.3 1654.26   1
   2   8   0 14682.8 1638.25   4
   2   8   1-169.172 271.647   4
   2   8   1-217.821 394.442   3
   2   8   1-32.2764 320.163   1
   2   8   2 23418.6 2209.93   4
   2   8   2 24223.4 2217.40   1
  -2  -8  -2 19667.0 2194.97   2
   2   8   2 20671.0 2225.85   3
  -2  -8  -3 14220.8 1464.99   2
   2   8   3 12266.5 1497.92   3
   2   8   3 15599.6 1484.33   4
   2   8   4 23672.8 2183.10   5
  -2  -8  -4 19635.3 2161.96   2
   2   8   4 21072.1 2186.78   3
   2   8   4 22815.0 2178.62   4
   2   8   5 6278.27 673.307   5
  -2  -8  -5 5626.29 641.052   2
   2   8   5 6399.39 681.598   4
   2   8   6 234.873 256.352   5
  -2  -8  -6 618.110 222.670   2
   2   8   6 131.603 297.171   4
  -2  -8  -7 4239.04 519.633   2
   2   8   7 4482.71 563.171   4
   2   8   7 4869.78 526.402   5
  -2  -8  -8 596.257 241.062   2
   2   8   8 399.764 226.692   5
   2   8   8 215.384 324.003   4
  -2  -8  -9 2763.43 379.601   2
   2   8   9 2617.26 353.915   5
   2   8   9 2844.76 434.580   4
   2   8  10 1227.66 247.361   5
  -2  -8 -10 1133.05 285.705   2
   2   8  10 1065.30 342.043   4
  -2  -8 -11 3119.26 424.850   2
  -2  -8 -12 136.823 282.013   2
  -2  -8 -13 252.321 310.533   2
   2   8  13 183.772 259.929  12
  -2  -8 -14 714.835 352.850   2
  -2  -8 -15-389.256 381.242   2
   2   8  15 499.868 301.997  12
   2   8  16-16.8335 295.395  12
   2   8  16 271.510 358.190  11
   2   8  17 912.311 279.995  12
   2   8  18 182.756 282.060  14
   2   8  19 1016.88 285.370  14
   2   8  19 1334.78 310.636  11
   2   8  20 56.5716 214.902  14
   2   8  21 89.8187 165.456   7
   2   8  21 368.665 181.000  14
   2   8  22-115.384 122.123   7
   2   8  22 67.2231 127.485  14
  -2  -9  13 120.385 213.149  23
   2   9 -12 282.771 213.076  10
  -2  -9  12 242.669 299.864  23
   2   9 -12 10.7806 199.097   6
   2   9 -12-275.081 308.437  30
   2   9 -11 57.9624 235.577   6
   2   9 -11-266.877 353.111  30
   2   9 -11 394.263 269.304  10
   2   9 -10 178.120 265.405   6
   2   9 -10-531.349 405.370  30
   2   9 -10 19.7690 319.454  10
   2   9  -9 1250.23 495.244  24
   2   9  -9 813.346 449.252  30
   2   9  -9 1151.30 371.707  10
   2   9  -9 1135.63 309.377   6
   2   9  -8-305.241 377.567  10
   2   9  -8 120.802 421.450   1
   2   9  -8-458.963 306.065   6
   2   9  -8-673.551 449.299  30
   2   9  -8 415.311 498.580  24
   2   9  -7-52.4885 445.163   1
   2   9  -7 322.061 449.404  30
   2   9  -7 510.342 397.643  10
   2   9  -7 595.258 513.256  24
   2   9  -6 809.831 456.217  30
   2   9  -6 1454.76 407.645  21
   2   9  -6 1273.92 398.615  10
   2   9  -6 1223.11 443.483   1
   2   9  -6 721.463 516.240  24
   2   9  -5-261.737 368.166  10
   2   9  -5 534.671 283.660   6
   2   9  -5 448.970 447.743   3
   2   9  -5 28.0165 319.128   2
   2   9  -5 252.124 458.665  24
   2   9  -5-174.365 395.295   1
   2   9  -5-36.8926 389.920  21
   2   9  -5 584.151 410.386  30
   2   9  -4 377.114 265.994   6
   2   9  -4 599.140 302.657   2
   2   9  -4 1183.46 379.657   1
   2   9  -4 419.913 348.831  10
   2   9  -4 417.493 380.269  21
   2   9  -4 670.733 422.016  24
   2   9  -3 351.557 337.256   1
   2   9  -3-406.280 272.724   2
   2   9  -2 2405.85 449.817   3
   2   9  -2 2133.82 408.438   1
   2   9  -2 2230.07 346.421   2
   2   9  -1 526.324 366.746   3
   2   9  -1 338.331 319.006   1
   2   9  -1 736.630 240.141   2
   2   9  -1 191.901 256.294   4
   2   9   0-307.932 366.909   3
   2   9   0 410.522 315.518   1
   2   9   0-23.0369 245.665   4
   2   9   1-45.3002 315.614   1
   2   9   1 219.934 380.889   3
   2   9   1 166.836 258.629   4
   2   9   2 3082.32 576.365   3
   2   9   2 3989.64 507.063   4
   2   9   3-153.378 267.577   4
   2   9   3-249.272 361.925   3
   2   9   4 983.472 358.250   3
   2   9   4 823.849 284.105   4
   2   9   5 67.6071 281.858   4
   2   9   5-75.0811 300.174   5
   2   9   6-310.224 294.133   4
   2   9   6-50.5133 265.788   5
   2   9   7 332.110 286.383   4
   2   9   7 623.871 247.219   5
   2   9   8 1137.07 321.490   4
   2   9   8 706.177 244.156   5
   2   9   9-71.3963 210.214   5
   2   9   9 221.023 300.162   4
   2   9  10 1022.41 333.760   4
   2   9  12 217.785 265.292  12
   2   9  13-40.8472 299.088  12
   2   9  15 267.945 317.754  12
   2   9  15 460.698 461.574  29
   2   9  15-21.2343 337.481  11
   2   9  16 268.663 293.350  12
   2   9  17-81.4644 270.825  12
   2   9  17 898.767 296.281  14
   2   9  18 151.184 284.248  14
   2   9  18 246.895 301.081  11
   2   9  19 82.1693 278.918  11
   2   9  20 313.563 224.370  14
   2   9  20 94.7620 183.011   7
   2   9  21 189.915 182.515  14
   2   9  21-180.010 153.882   7
   2   9  22-41.9554 224.071  29
   2   9  22-42.2615 136.382  14
   2   9  22 206.956 119.235   7
  -2 -10  12 218.491 255.649  23
   2  10 -11 78.9410 201.024   6
   2  10 -11-2.33230 290.156  30
   2  10 -11 25.7861 234.741  10
   2  10 -10-570.027 342.423  30
   2  10 -10-164.643 233.028   6
   2  10 -10 71.9482 287.998  10
   2  10  -9 324.068 455.004  24
   2  10  -9 122.462 328.528  10
   2  10  -9 636.194 371.197  30
   2  10  -9-47.0613 270.482   6
   2  10  -8-177.628 368.729  10
   2  10  -8-549.920 474.465  24
   2  10  -8-94.6458 402.367  30
   2  10  -7 339.759 418.975  30
   2  10  -7 919.188 517.347  24
   2  10  -7 555.963 389.616  10
   2  10  -6 4682.57 502.744   6
   2  10  -6 4213.45 602.790   1
   2  10  -6 3423.37 580.944  21
   2  10  -6 3802.17 565.908  10
   2  10  -6 4222.82 647.966  24
   2  10  -5 2660.46 549.205   1
   2  10  -5 3433.12 512.050  10
   2  10  -5 3421.90 544.323  21
   2  10  -5 3004.96 613.034  24
   2  10  -5 3425.27 452.917   6
   2  10  -4 614.647 409.191   1
   2  10  -4 1108.77 313.202   6
   2  10  -4 1499.01 472.002  24
   2  10  -4 859.506 377.933  10
   2  10  -4 936.956 436.794  21
   2  10  -3 332.910 360.936   1
   2  10  -3-30.4874 269.927   6
   2  10  -3 165.353 414.517   3
   2  10  -3 151.838 335.483  10
   2  10  -3 443.540 407.072  21
   2  10  -3 89.9981 276.713   4
   2  10  -3-654.558 418.580  24
   2  10  -2 2319.78 470.617   3
   2  10  -2 1993.72 354.240   4
   2  10  -2 2370.35 419.591   1
   2  10  -1 1272.39 399.489   3
   2  10  -1 1312.17 350.052   1
   2  10  -1 1391.47 285.157   4
   2  10   0 17459.5 1830.98   3
   2  10   0 19788.0 1822.61   1
   2  10   0 15910.1 1804.96   4
   2  10   1 13805.1 1541.41   3
   2  10   1 13693.3 1514.87   4
   2  10   1 16539.9 1533.65   1
   2  10   2 18757.8 2112.56   3
   2  10   2 22380.7 2107.16   1
   2  10   2 19788.6 2092.74   4
   2  10   3 1734.26 421.598   3
   2  10   3 2768.67 357.778   4
   2  10   4 799.600 259.139   4
   2  10   4 500.647 334.424   3
   2  10   5 64484.1 6502.66   4
   2  10   5 62817.7 6504.16   5
   2  10   6 1081.41 298.408   4
   2  10   6 1273.67 304.691   5
   2  10   7 27911.8 2853.75   5
   2  10   7 27665.3 2860.43   4
   2  10   8 6041.70 706.682   4
   2  10   8 6213.76 677.498   5
   2  10   9 8545.89 941.452   4
   2  10  10 9726.10 1060.34   4
   2  10  12 3603.66 465.064  14
   2  10  13 2593.14 366.280  11
   2  10  13 1748.08 363.090  14
   2  10  13 1405.43 486.408  29
   2  10  14 1180.96 332.866  14
   2  10  14 1084.98 341.278  11
   2  10  14 1431.78 327.588  12
   2  10  15 304.915 301.339  12
   2  10  16-11.0309 292.827  12
   2  10  17-281.950 309.611  12
   2  10  17-40.8690 307.185  11
   2  10  18 99.7504 292.584  11
   2  10  19 590.639 258.193  14
   2  10  19 18.3429 196.431   7
   2  10  20 202.320 179.474   7
   2  10  20 675.731 214.755  14
   2  10  20-27.0670 346.790  34
   2  10  21 67.5788 149.701   7
   2  10  21 24.7272 176.246  14
   2  10  22 162.391 137.943  14
   2  10  22 65.2921 114.109   7
  -2 -11  12 134.906 184.592  23
  -2 -11  11 355.561 267.051  23
   2  11 -11 279.790 198.061  10
   2  11 -10-293.431 206.422   6
   2  11 -10 244.156 263.673  30
   2  11 -10-126.647 253.899  10
   2  11  -9 523.748 315.804  30
   2  11  -9 953.605 305.891  10
   2  11  -8 110.204 447.567  24
   2  11  -8 26.3499 342.858  30
   2  11  -8 36.4076 339.865  10
   2  11  -7 154.600 280.133   6
   2  11  -7 113.547 368.733  10
   2  11  -6 850.159 307.134   6
   2  11  -6 403.879 506.476  24
   2  11  -6 983.271 410.073  10
   2  11  -5 32.0581 306.432   6
   2  11  -5 205.848 506.774  24
   2  11  -5 455.077 425.374  21
   2  11  -5 391.831 391.990  10
   2  11  -5-307.329 413.879   1
   2  11  -4 1670.94 439.959   1
   2  11  -4 1482.99 507.210  24
   2  11  -4 911.040 317.528   6
   2  11  -4 1030.80 473.242  21
   2  11  -4 1047.22 402.033  10
   2  11  -3 857.461 462.540  24
   2  11  -3 586.923 293.628   6
   2  11  -3 679.220 393.101   1
   2  11  -3 997.287 468.417   3
   2  11  -3 324.997 449.248  21
   2  11  -2 665.155 370.885   1
   2  11  -2 1071.99 275.986   6
   2  11  -2 394.062 423.261  24
   2  11  -2 392.684 435.958  21
   2  11  -2-60.8199 432.808   3
   2  11  -1 359.141 419.099   3
   2  11  -1 87.6884 315.780  10
   2  11  -1-242.926 361.406   1
   2  11  -1 334.278 418.702  21
   2  11  -1-183.406 387.999  24
   2  11   0 142.986 325.037   1
   2  11   0 80.2425 388.429  21
   2  11   0 81.4535 395.758   3
   2  11   1 165.430 369.515   3
   2  11   1 851.186 251.217   4
   2  11   1 737.277 324.554   1
   2  11   2 247.286 348.641   3
   2  11   2 66.5885 239.097   4
   2  11   3 2326.02 329.719   4
   2  11   3 1768.30 404.504   3
   2  11   4-260.209 318.451   3
   2  11   4-36.8524 233.330   4
   2  11   5 643.753 252.587   4
   2  11   6 106.110 248.941   4
   2  11   7 196.681 271.419   5
   2  11   7 426.656 268.713   4
   2  11   8-212.058 288.999   4
   2  11   9 1344.54 342.818   4
   2  11  10 262.666 317.866   4
   2  11  12 630.040 217.914   8
   2  11  12 1006.98 284.917  14
   2  11  12 1188.94 207.322   7
   2  11  13 789.447 215.213   7
   2  11  13 1027.78 303.435  14
   2  11  14 350.391 207.701   7
   2  11  14 268.769 305.321  14
   2  11  14 114.466 324.613  12
   2  11  15 2199.19 331.355   7
   2  11  15 2887.34 398.228  11
   2  11  15 2099.14 422.533  12
   2  11  15 2587.53 399.161  14
   2  11  16 109.703 326.186  12
   2  11  16-18.4943 216.151   7
   2  11  16 204.799 302.873  11
   2  11  16-135.430 485.711  29
   2  11  17 240.631 214.616   7
   2  11  17 490.987 291.925  11
   2  11  17-169.808 302.292  12
   2  11  18 449.956 398.879  34
   2  11  18-94.6631 201.984   7
   2  11  19 55.5589 187.002   7
   2  11  19-69.2842 241.446  14
   2  11  20 68.3540 219.581  14
   2  11  20 173.936 172.467   7
   2  11  21 19.3745 178.784  14
   2  11  21 117.311 138.469   7
   2  11  22-139.332 103.591   7
   2  11  22-50.8882 135.457  14
   2  11  22 71.1571 132.569  19
   2  11  22-139.346 206.074  34
  -2 -12  11-49.3491 197.279  23
   2  12 -10 567.339 210.535  10
  -2 -12  10 95.4409 298.527  23
   2  12  -9 382.331 263.805  10
   2  12  -8 679.923 315.589  10
   2  12  -8 699.263 390.544  24
   2  12  -8 503.386 243.945   6
   2  12  -7 590.965 353.438  10
   2  12  -7-346.936 440.664  24
   2  12  -7 476.473 269.041   6
   2  12  -6 790.133 291.151   6
   2  12  -6 626.540 386.183  10
   2  12  -6 1020.85 473.955  24
   2  12  -5 1410.73 443.264  10
   2  12  -5 1691.54 345.034   6
   2  12  -5 2479.99 522.994  24
   2  12  -4 959.613 417.314   1
   2  12  -4 76.7817 303.017   6
   2  12  -4 955.756 414.503  10
   2  12  -4 135.783 466.218  21
   2  12  -4 311.514 494.941  24
   2  12  -3 243.756 473.281  21
   2  12  -3 433.548 304.954   6
   2  12  -3 1071.95 486.205  24
   2  12  -3 1447.18 414.268   1
   2  12  -2 4318.18 509.469   6
   2  12  -2 3324.22 645.179  21
   2  12  -2 3280.66 632.458  24
   2  12  -2 4956.94 601.731   1
   2  12  -1 569.390 449.116   3
   2  12  -1 235.535 419.361  24
   2  12  -1 22.4744 269.836   6
   2  12  -1 329.336 467.586  21
   2  12  -1 369.903 369.625  10
   2  12  -1 255.362 387.333   1
   2  12   0 7752.98 885.648  21
   2  12   0 7075.68 816.892  10
   2  12   0 6941.03 842.395  24
   2  12   0 7148.70 879.964   3
   2  12   0 6745.10 786.469   6
   2  12   0 8527.55 849.607   1
   2  12   1 1030.70 362.107   1
   2  12   1 575.668 403.689   3
   2  12   1 805.934 328.266  10
   2  12   1 463.214 455.480  21
   2  12   2 9416.15 1053.08   3
   2  12   3 7913.89 899.426   3
   2  12   6 2038.26 338.694   4
   2  12   7 1593.21 322.410   4
   2  12   8 2347.35 393.590   4
   2  12   9 157.237 316.311   4
   2  12  10 2442.13 316.169   8
   2  12  10 2434.07 395.509  12
   2  12  11 510.042 203.933   8
   2  12  11 773.469 292.425  12
   2  12  11 901.783 253.304  14
   2  12  12 450.676 263.484  14
   2  12  12-280.197 201.812   8
   2  12  12 548.560 309.497  12
   2  12  13 2909.97 556.652  29
   2  12  13 2643.89 370.188   7
   2  12  13 3387.53 430.951  14
   2  12  13 2900.08 377.189   8
   2  12  13 4280.70 457.118  12
   2  12  14-130.654 201.116   7
   2  12  14 291.085 288.675  14
   2  12  15 1443.47 272.753   7
   2  12  15 2514.45 356.344  14
   2  12  15 2555.76 366.529  12
   2  12  16-43.2099 205.955   7
   2  12  16-387.227 291.976  14
   2  12  16-19.1964 326.148  12
   2  12  16-163.337 464.027  29
   2  12  17 826.783 293.375  14
   2  12  17 635.689 318.039  12
   2  12  17 809.876 215.646   7
   2  12  18 400.045 194.397   7
   2  12  19 241.273 176.842   7
   2  12  20-81.9522 156.841   7
   2  12  21 56.8584 128.841   7
   2  12  21-16.9017 171.338  14
   2  12  22-213.515 170.749  34
   2  12  22 6.44654 127.333  14
   2  12  22 9.47227 137.969  19
  -2 -13  10-380.244 212.612  23
   2  13  -9 203.733 210.402  10
   2  13  -8-461.201 202.465   6
   2  13  -8 159.954 258.459  10
   2  13  -7 269.507 310.055  10
   2  13  -7-87.4128 380.953  24
   2  13  -7 201.624 226.264   6
   2  13  -6 398.292 420.723  24
   2  13  -6 311.869 353.034  10
   2  13  -6 427.247 254.144   6
   2  13  -5 1074.62 384.783  10
   2  13  -5 1098.96 291.759   6
   2  13  -5 531.246 453.882  24
   2  13  -4 247.352 473.016  24
   2  13  -4 513.226 273.964   6
   2  13  -4 30.2480 382.018  10
   2  13  -3-399.805 281.918   6
   2  13  -3 216.776 474.965  24
   2  13  -3 82.1215 474.138  21
   2  13  -2 231.739 288.906   6
   2  13  -2 296.079 404.411   1
   2  13  -2-457.873 481.732  21
   2  13  -2 517.608 474.281  24
   2  13  -1-185.838 461.605  24
   2  13  -1-224.654 486.197  21
   2  13  -1 91.8630 280.912   6
   2  13  -1 318.902 391.632   1
   2  13  -1 10.2100 380.388  10
   2  13   0 1176.32 394.213  10
   2  13   0 1235.34 296.953   6
   2  13   0 1540.71 524.310  21
   2  13   0 1701.16 452.258  24
   2  13   1 146.054 467.913  21
   2  13   1 590.278 355.963  10
   2  13   1 611.726 399.948  24
   2  13   2 1048.06 353.630  10
   2  13   2 1058.94 379.827  24
   2  13   3-411.220 454.990  21
   2  13   3-516.919 328.096  10
   2  13   4 840.367 468.695  21
   2  13   4 310.815 341.610  31
   2  13   4 104.727 304.868  10
   2  13   5 1054.53 480.555  21
   2  13   6 1401.65 361.182  31
   2  13   7 1986.77 345.882  17
   2  13   7 911.145 343.504  31
   2  13   7 1661.50 463.557  26
   2  13   8 1304.03 443.791  26
   2  13   9 575.876 274.448  12
   2  13   9 492.053 416.632  26
   2  13  10 558.289 211.171   8
   2  13  10 528.425 301.671  12
   2  13  10 581.224 233.352  14
   2  13  11 3.59590 307.528  12
   2  13  11 292.390 201.223   8
   2  13  11-55.1969 248.700  14
   2  13  12 270.122 203.848   8
   2  13  12 184.593 330.091  12
   2  13  12 468.991 260.037  14
   2  13  13 471.584 204.607   8
   2  13  13 203.109 266.342  14
   2  13  13 112.861 338.672  12
   2  13  14-220.446 277.223  14
   2  13  14 265.070 318.476  12
   2  13  14 177.965 191.257   7
   2  13  15 2090.46 328.085  14
   2  13  15 1225.59 248.719   7
   2  13  16 552.086 275.456  14
   2  13  16 227.716 194.190   7
   2  13  17 652.597 259.858  14
   2  13  17-209.014 183.591   7
   2  13  18 47.6340 175.336   7
   2  13  18 151.349 248.053  14
   2  13  19-141.112 159.770   7
   2  13  19 261.897 225.411  14
   2  13  20 119.838 134.668   7
   2  13  20-61.0778 261.689  34
   2  13  21-9.63545 208.275  34
   2  13  22 48.8582 130.818  19
   2  14  -9 199.173 141.262  10
  -2 -14   9 149.870 205.293  23
   2  14  -8-145.548 206.937  10
   2  14  -7 1251.82 284.177  10
   2  14  -7 955.400 219.282   6
   2  14  -6-190.015 299.162  10
   2  14  -6 23.2810 209.113   6
   2  14  -6-352.693 356.195  24
   2  14  -5 602.840 236.146   6
   2  14  -5 911.507 350.168  10
   2  14  -4-453.403 432.233  24
   2  14  -4-32.6709 363.974  10
   2  14  -4-23.8820 255.579   6
   2  14  -3 271.742 274.404   6
   2  14  -3 1611.02 464.212  24
   2  14  -2 525.748 462.636  24
   2  14  -2 578.841 264.152   6
   2  14  -1 4525.60 748.209  21
   2  14  -1 4833.81 607.199   6
   2  14  -1 5182.82 712.202  24
   2  14  -1 6760.59 679.715  10
   2  14   0 1348.93 456.477  24
   2  14   0 1320.08 531.751  21
   2  14   0 1737.09 406.198  10
   2  14   0 1124.73 290.126   6
   2  14   1 652.948 376.798  10
   2  14   1 585.499 483.538  21
   2  14   1 115.546 413.467  24
   2  14   2 856.837 377.646  10
   2  14   2 476.266 396.126  24
   2  14   3 24.2533 498.583  21
   2  14   3-251.055 352.737  10
   2  14   3-676.442 368.380  31
   2  14   4 384.131 470.172  21
   2  14   4 325.397 335.066  10
   2  14   5 1151.62 337.595  10
   2  14   5 1289.32 365.954  31
   2  14   6 821.769 310.198  17
   2  14   6 400.090 342.256  31
   2  14   6 166.610 506.140  26
   2  14   7 6043.01 729.999  31
   2  14   7 6641.40 808.359  26
   2  14   8 222.919 461.062  26
   2  14   9 8988.04 966.132  12
   2  14   9 8909.18 1028.06  26
   2  14  10 521.771 217.168   8
   2  14  10 424.327 299.147  12
   2  14  11 82.4323 290.057  12
   2  14  11 223.449 209.897   8
   2  14  11 108.985 234.662  14
   2  14  12 950.747 225.652   8
   2  14  12 785.937 253.236  14
   2  14  12 559.061 319.739  12
   2  14  13 2204.68 312.128   8
   2  14  13 2398.32 352.923  14
   2  14  13 2360.03 417.959  12
   2  14  14 788.404 350.240  12
   2  14  14 811.008 274.159  14
   2  14  15 1085.42 281.039  14
   2  14  15 742.063 322.571  12
   2  14  16-30.6320 465.018  29
   2  14  16 236.676 253.917  14
   2  14  17-325.937 242.618  14
   2  14  17 199.842 303.907  34
   2  14  18-36.3572 289.835  34
   2  14  18 99.1913 223.230  14
   2  14  19-247.805 254.082  34
   2  14  19 11.8016 203.107  14
   2  14  20 175.504 181.031  14
   2  14  20-149.041 216.611  34
   2  14  21-31.1066 144.100  14
   2  14  22 26.6611 116.138  19
   2  15  -8 191.835 130.346  10
   2  15  -7 91.3402 191.935  10
   2  15  -7 33.1696 261.083  26
   2  15  -7-191.561 217.238  31
   2  15  -6 196.794 244.354  10
   2  15  -5 526.283 337.486  24
   2  15  -5 233.447 193.995   6
   2  15  -5 326.387 294.555  10
   2  15  -4 113.014 382.736  24
   2  15  -4 334.457 313.734  10
   2  15  -4-168.420 209.479   6
   2  15  -3 216.699 226.621   6
   2  15  -3 225.265 405.108  24
   2  15  -2 607.494 439.540  24
   2  15  -2 494.182 241.601   6
   2  15  -1 451.920 232.483   6
   2  15  -1 467.596 442.724  24
   2  15  -1-237.290 382.825  10
   2  15   0 756.100 395.706  10
   2  15   0 408.269 440.003  24
   2  15   1 520.302 429.480  24
   2  15   1 15.2935 378.243  10
   2  15   2 527.501 373.228  10
   2  15   2 748.278 409.032  24
   2  15   2-401.322 375.997  31
   2  15   3 1641.75 391.350  10
   2  15   3 1131.34 411.180  24
   2  15   3 945.065 396.355  31
   2  15   4 1899.74 413.496  10
   2  15   5 424.704 337.093  10
   2  15   5 391.738 373.717  31
   2  15   6 1297.35 543.109  26
   2  15   6 1441.44 386.756  31
   2  15   6 1678.96 365.416  10
   2  15   7-281.971 506.599  26
   2  15   7 8.37999 349.165  31
   2  15   8 1646.29 516.384  26
   2  15   9 2463.08 511.243  26
   2  15  10 1122.65 246.018   8
   2  15  11 3380.45 410.818   8
   2  15  12-38.5655 201.051   8
   2  15  12 10.8534 218.642  14
   2  15  13-64.4122 232.268  14
   2  15  13 242.477 189.365   8
   2  15  14 78.5486 237.784  14
   2  15  15 797.062 465.387  29
   2  15  15 441.829 249.600  14
   2  15  16 300.068 233.932  14
   2  15  17 1398.92 268.473  14
   2  15  18 138.562 205.864  14
   2  15  19 305.707 190.665  14
   2  15  20 198.483 162.671  14
   2  15  21 90.3482 154.484  19
   2  15  21 194.733 127.110  14
  -2 -16   7-14.8638 157.060  23
   2  16  -6-162.700 178.390  10
   2  16  -6-99.3640 192.484  31
   2  16  -5 296.393 236.171  31
   2  16  -5 137.054 232.323  10
   2  16  -4-119.448 301.791  24
   2  16  -4 203.972 279.703  31
   2  16  -3 245.816 306.302  31
   2  16  -3 186.971 339.251  24
   2  16  -3 169.104 181.361   6
   2  16  -2-111.560 371.223  24
   2  16  -2 192.608 332.779  31
   2  16  -2-159.458 190.946   6
   2  16  -1 1566.94 272.557   6
   2  16  -1 2686.31 405.289  10
   2  16  -1 1201.60 397.953  31
   2  16  -1 1968.26 434.552  24
   2  16   0 4.71687 372.482  10
   2  16   0-353.863 368.731  31
   2  16   0 232.637 400.978  24
   2  16   1 947.908 412.198  31
   2  16   1 1402.26 453.506  24
   2  16   2-349.987 399.813  24
   2  16   2 251.572 362.148  10
   2  16   3 721.958 366.224  10
   2  16   3 852.332 386.397  31
   2  16   4 660.137 363.709  10
   2  16   4 448.886 374.905  31
   2  16   5 234.927 370.964  31
   2  16   5 92.8019 527.509  26
   2  16   5 582.065 336.998  10
   2  16   6 1345.94 389.310  31
   2  16   6 897.210 533.669  26
   2  16   6 1566.08 350.024  10
   2  16   7 876.497 514.292  26
   2  16   8 3744.60 605.266  26
   2  16   9 520.365 442.579  26
   2  16  10 1121.31 228.107   8
   2  16  10 234.889 425.024  26
   2  16  11-490.603 205.996   8
   2  16  11 208.281 433.764  29
   2  16  12 364.970 193.427   8
   2  16  13 2135.50 275.012   8
   2  16  13 1745.08 296.649  14
   2  16  14 1656.62 282.025  14
   2  16  15 3425.65 386.709  14
   2  16  15 1644.11 548.288  29
   2  16  16 319.013 216.153  14
   2  16  17-50.1617 200.284  14
   2  16  18-23.2007 185.563  14
   2  16  19-37.8324 162.494  14
   2  16  20 115.279 135.598  14
   2  16  21-4.40703 97.4178  14
   2  16  21 403.640 128.718  19
   2  17  -5 82.5620 157.947  31
   2  17  -5 139.506 208.488  26
   2  17  -5 234.935 148.821  10
  -2 -17   5 236.806 201.985  23
   2  17  -4-4.04345 283.160  26
   2  17  -4-40.8290 211.884  31
   2  17  -3 251.319 325.413  26
   2  17  -2-92.9311 294.410  24
   2  17  -1-176.766 319.140  24
   2  17  -1-284.588 312.786  10
   2  17   0 849.348 338.295  10
   2  17   0 396.542 350.083  24
   2  17   1-163.421 364.759  24
   2  17   1 347.208 327.606  31
   2  17   1 132.575 341.578  10
   2  17   2-176.084 347.811  31
   2  17   2 492.411 347.454  10
   2  17   3 705.212 503.476  26
   2  17   3-429.827 341.605  31
   2  17   3 596.492 338.925  10
   2  17   4-48.7949 332.950  10
   2  17   4 673.176 515.138  26
   2  17   4 337.527 352.163  31
   2  17   5 229.871 495.754  26
   2  17   5-181.562 337.892  10
   2  17   5-447.565 339.051  31
   2  17   6-237.199 323.901  10
   2  17   6 328.706 492.633  26
   2  17   7 34.0584 460.395  26
   2  17   8 140.501 455.896  26
   2  17   9 676.181 431.112  26
   2  17  10 78.1828 187.396   8
   2  17  11 151.438 187.606   8
   2  17  12-294.902 178.378   8
   2  17  14 112.583 188.478  14
   2  17  14 633.346 414.987  29
   2  17  15-8.27281 185.479  14
   2  17  16 494.452 189.994  14
   2  17  17 739.554 189.045  14
   2  17  18 47.0067 151.720  14
   2  17  19 15.4034 131.517  14
   2  17  19 169.078 191.119  19
   2  17  20 88.6771 148.109  19
   2  18  -3 243.521 238.941  26
   2  18  -3 38.2678 165.109  31
  -2 -18   3 210.550 207.369  23
   2  18  -2-195.131 214.914  10
   2  18  -2 91.0565 209.853  31
   2  18  -2 58.7184 288.885  26
   2  18  -1-107.403 244.684  31
   2  18  -1-81.6260 242.357  10
   2  18   0-146.519 271.602  10
   2  18   0 125.352 263.206  31
   2  18   1 378.894 415.276  26
   2  18   1 83.4272 296.376  31
   2  18   1 589.399 296.098  10
   2  18   2-324.893 419.534  26
   2  18   2 10.6246 294.893  31
   2  18   2 563.157 304.663  10
   2  18   3 398.854 442.021  26
   2  18   3 194.331 302.896  31
   2  18   3 836.942 312.645  10
   2  18   4 91.4008 316.054  10
   2  18   4 485.452 461.177  26
   2  18   4 598.503 321.879  31
   2  18   5-233.985 305.704  10
   2  18   5-239.636 455.411  26
   2  18   6 1950.20 496.579  26
   2  18   6 1868.46 358.254  10
   2  18   7-189.171 441.025  26
   2  18   8 1136.95 450.043  26
   2  18   9-241.334 393.485  26
   2  18   9 12.9798 179.505   8
   2  18  10 1123.88 210.492   8
   2  18  12 474.163 373.412  29
   2  18  13 76.0142 222.163  19
   2  18  14-131.310 223.012  19
   2  18  15 174.351 218.787  19
   2  18  16-74.4806 219.748  19
   2  18  17-114.955 203.718  19
   2  18  18 110.774 180.580  19
   2  18  18-105.151 153.776  28
   2  18  19 169.108 146.642  19
   2  19  -1 220.131 167.237  10
   2  19   0 249.391 201.635  10
   2  19   1-130.368 331.261  26
   2  19   1 189.063 229.704  10
   2  19   2 219.733 356.724  26
   2  19   2 277.228 250.620  10
   2  19   3 54.6365 375.683  26
   2  19   3 319.463 254.858  10
   2  19   4-252.857 270.109  10
   2  19   4-639.576 393.728  26
   2  19   5 91.8165 265.671  10
   2  19   5 193.913 389.803  26
   2  19   6-2.90698 390.098  26
   2  19   7 633.877 382.232  26
   2  19   8-68.6290 155.650   8
   2  19   8 187.189 358.995  26
   2  19   9 206.637 328.858  26
   2  19  16 174.580 154.982  19
   2  19  17-63.1326 138.832  19
   2  20   1 210.047 216.140  26
   2  20   2 1103.89 191.837  10
   2  20   2 844.515 283.943  26
   2  20   3 48.5358 285.957  26
   2  20   3 348.033 180.508  10
   2  20   4 875.974 205.077  10
   2  20   4 242.581 316.509  26
   2  20   5-76.2044 321.060  26
   2  20   6 434.088 309.399  26
   2  20   7-15.6357 300.680  26
   2  20   8-1.74407 283.956  26
   2  21   4-347.841 185.604  20
   2  21   5 193.053 201.599  20
   2  21   6 76.4003 202.782  20
   2  21   7 134.648 190.263  20
  -3  19   7 245.595 199.197  10
  -3  19   7 136.951 229.331  24
  -3  19   6 176.144 237.718  24
  -3  19   6 168.722 207.571  10
  -3  19   5-172.178 249.261  24
  -3  19   5-88.2357 213.412  10
  -3  19   4 628.915 224.865  10
  -3  19   4 176.722 250.352  24
  -3  19   3-83.0662 230.829  24
  -3  19   3 288.361 211.476  10
  -3  19   2 712.128 211.763  10
  -3  19   2 404.606 227.334  24
  -3  19   1 176.974 182.664  10
  -3  19   0-3.01743 149.392  10
  -3  18  15-65.5299 145.787  19
  -3  18  15-80.1237 168.640  28
  -3  18  14-19.6769 170.967  19
  -3  18  14-105.648 192.450  28
  -3  18  13 80.6429 172.702  19
  -3  18  13 43.1716 214.279  28
  -3  18  12 20.3209 230.269  28
  -3  18  11-286.603 247.119  28
  -3  18  10 1.88915 242.313  24
  -3  18   9 337.452 261.569  24
  -3  18   9-54.6750 186.042  15
  -3  18   8-122.960 280.553  24
  -3  18   8 417.434 193.023  15
  -3  18   8 99.6007 223.715  10
  -3  18   7 46.5819 295.843  24
  -3  18   7-280.637 245.430  10
  -3  18   7 124.630 195.662  15
  -3  18   6 436.118 313.878  24
  -3  18   6 128.325 250.308  10
  -3  18   5-69.5156 318.664  24
  -3  18   5 11.6235 257.830  10
  -3  18   4 176.043 261.080  10
  -3  18   4 602.244 319.755  24
  -3  18   3 868.163 321.546  24
  -3  18   3 364.790 268.513  10
  -3  18   2 85.6798 262.184  10
  -3  18   2-238.826 319.037  24
  -3  18   1 421.002 275.598  26
  -3  18   1 434.521 258.392  10
  -3  18   1 224.082 300.613  24
  -3  18   0 331.694 254.514  26
  -3  18   0 502.999 285.253  24
  -3  18  -1-126.886 253.225  24
  -3  18  -1 129.331 230.083  26
  -3  18  -2-162.646 198.546  24
  -3  17  17-13.5796 154.047  28
  -3  17  17 30.6049 138.387  19
  -3  17  16 55.0013 174.759  19
  -3  17  16 141.479 199.348  28
  -3  17  15-243.785 233.294  28
  -3  17  15 4.89591 204.971  19
  -3  17  14 228.376 223.425  19
  -3  17  14 112.585 256.074  28
  -3  17  13 216.099 280.783  28
  -3  17  13 84.0957 245.835  19
  -3  17  12 273.576 243.562  19
  -3  17  12 55.8497 289.895  28
  -3  17  11 434.758 265.992  24
  -3  17  11 269.941 301.172  28
  -3  17  11 29.8166 237.111  19
  -3  17  10-168.970 305.047  28
  -3  17  10-147.526 293.235  24
  -3  17   9 296.174 324.411  24
  -3  17   9 1004.96 249.729  10
  -3  17   9 534.546 308.059  28
  -3  17   8 1311.53 322.778  28
  -3  17   8 1142.42 293.587  10
  -3  17   8 1087.63 352.474  24
  -3  17   7 647.259 284.796  10
  -3  17   7 614.752 339.938  24
  -3  17   6 1665.44 386.683  24
  -3  17   6 1609.26 290.082  15
  -3  17   6 1587.90 332.508  10
  -3  17   5 2.04797 291.710  10
  -3  17   5-62.9131 236.562  15
  -3  17   5 93.7195 351.273  24
  -3  17   4 409.344 363.605  24
  -3  17   4 693.583 300.392  10
  -3  17   4 423.628 245.509  15
  -3  17   3 138.662 235.414  15
  -3  17   3-144.011 338.014  26
  -3  17   3-377.220 364.425  24
  -3  17   3-331.733 355.758  21
  -3  17   3 97.2863 298.794  10
  -3  17   2 312.317 298.633  10
  -3  17   2 472.169 236.341  15
  -3  17   2 163.949 364.352  24
  -3  17   2 30.6329 346.542  26
  -3  17   2 904.358 378.190  21
  -3  17   1 331.749 368.312  21
  -3  17   1-430.498 362.468  24
  -3  17   1 288.162 288.772  10
  -3  17   0 226.967 324.130  21
  -3  17   0-342.508 353.080  24
  -3  17  -1 62.8163 343.506  24
  -3  17  -2 568.118 321.247  24
  -3  17  -2 675.868 266.427  10
  -3  17  -3 260.444 228.060  10
  -3  17  -3-291.298 280.327  24
  -3  17  -4-6.05868 221.277  24
  -3  17  -4 323.590 183.486  10
  -3  16  18 22.2969 152.219  28
  -3  16  17 114.254 207.136  28
  -3  16  16 166.173 244.592  28
  -3  16  16 504.365 222.001  19
  -3  16  15 311.229 273.938  28
  -3  16  15 176.788 244.135  19
  -3  16  14-177.962 297.962  28
  -3  16  14-125.050 260.773  19
  -3  16  13 226.480 317.946  28
  -3  16  13 123.777 256.047  24
  -3  16  13-256.962 276.976  19
  -3  16  12-419.006 286.758  19
  -3  16  12-69.2697 327.099  28
  -3  16  12 82.9521 281.208  24
  -3  16  11-101.728 281.779  19
  -3  16  11-151.864 345.333  28
  -3  16  11 533.055 299.102  24
  -3  16  10-95.3470 316.284  24
  -3  16  10-5.07076 276.907  19
  -3  16  10 94.4569 336.592  28
  -3  16   9-240.844 339.764  24
  -3  16   9-212.162 271.061  19
  -3  16   9-558.871 267.012  10
  -3  16   9 79.5044 332.616  28
  -3  16   8 1369.81 293.174  10
  -3  16   8 993.695 367.008  24
  -3  16   7 476.362 360.413  24
  -3  16   7 591.953 334.486  28
  -3  16   7 657.730 301.819  10
  -3  16   6 10.7773 368.090  24
  -3  16   6 69.2933 303.173  10
  -3  16   5-46.1453 315.788  10
  -3  16   5 820.046 377.362  24
  -3  16   5 176.747 380.891  21
  -3  16   4-336.211 324.258  10
  -3  16   4-81.9068 396.621  21
  -3  16   4 404.129 264.217  15
  -3  16   4 237.113 384.796  24
  -3  16   3-142.044 329.429  10
  -3  16   3 149.981 268.689  15
  -3  16   3 563.673 404.634  21
  -3  16   3 304.969 393.436  24
  -3  16   2 376.705 389.666  21
  -3  16   2-444.872 325.100  10
  -3  16   2-96.1992 399.568  24
  -3  16   2-18.7313 266.706  15
  -3  16   1 338.320 402.343  24
  -3  16   1-369.660 399.805  21
  -3  16   1-403.233 322.214  10
  -3  16   1-1.99190 264.311  15
  -3  16   0 291.170 387.445  21
  -3  16   0-613.408 263.337  15
  -3  16   0 497.149 399.193  24
  -3  16  -1 81.0455 252.221  15
  -3  16  -1-378.902 391.199  24
  -3  16  -2-287.209 230.846  15
  -3  16  -2 28.8419 292.134  10
  -3  16  -2 389.719 388.443  24
  -3  16  -3 512.118 365.023  24
  -3  16  -3-128.141 159.403   6
  -3  16  -3 111.519 330.346  21
  -3  16  -3-20.4769 284.511  10
  -3  16  -4-73.9531 139.726   6
  -3  16  -4-361.599 330.373  24
  -3  16  -4 152.197 257.699  10
  -3  16  -5-62.1561 277.999  24
  -3  16  -5 128.923 224.350  10
  -3  16  -5 187.076 116.218   6
  -3  16  -6-8.88811 209.517  24
  -3  16  -6-77.5877 163.310  10
  -3  15  19 67.8195 121.805  19
  -3  15  18 211.842 171.940  19
  -3  15  18 298.727 211.705  29
  -3  15  17-15.6904 221.919  34
  -3  15  16-19.9603 252.821  34
  -3  15  15 307.884 276.533  19
  -3  15  15 75.6467 287.015  34
  -3  15  14-109.286 311.739  34
  -3  15  14 69.9664 301.247  19
  -3  15  14 83.9411 262.100  24
  -3  15  13-184.495 306.438  19
  -3  15  13 27.2406 316.483  34
  -3  15  13 38.6558 284.824  24
  -3  15  12 276.981 302.108  24
  -3  15  12-254.388 328.801  34
  -3  15  12-95.1652 317.314  19
  -3  15  11-135.608 324.918  19
  -3  15  11 402.720 321.593  24
  -3  15  10 328.795 314.388  19
  -3  15  10 311.028 342.877  24
  -3  15  10-276.638 375.644  28
  -3  15   9 2555.57 378.731  19
  -3  15   9 1524.19 441.712  28
  -3  15   9 2114.01 422.331  24
  -3  15   8-386.047 364.838  28
  -3  15   8 301.286 350.597  24
  -3  15   8 216.941 287.678  19
  -3  15   7 38.3917 363.334  28
  -3  15   7 734.673 369.909  24
  -3  15   6 2242.36 403.385  21
  -3  15   6 1002.94 407.519  24
  -3  15   6 1092.71 384.473  28
  -3  15   5 1788.29 396.312  28
  -3  15   5 2380.91 437.331  24
  -3  15   5 1635.67 446.263  21
  -3  15   5 1872.23 383.569  10
  -3  15   4 755.755 430.359  21
  -3  15   4 426.685 392.367  24
  -3  15   4-304.963 338.971  10
  -3  15   3 305.451 402.450  24
  -3  15   3 149.708 281.469  15
  -3  15   3-44.1425 414.695  21
  -3  15   3 231.678 334.345  10
  -3  15   2 2885.85 411.107  15
  -3  15   2 2716.05 457.020  10
  -3  15   2 3019.10 513.800  24
  -3  15   2 2884.35 520.305  21
  -3  15   1 3207.09 433.767  15
  -3  15   1 2500.41 560.094  21
  -3  15   1 3354.96 532.488  24
  -3  15   0 947.841 446.216  24
  -3  15   0 1047.48 309.322  15
  -3  15   0 833.376 437.457  21
  -3  15  -1 1922.04 333.849  15
  -3  15  -1 1345.56 270.712   6
  -3  15  -1 1257.07 466.074  24
  -3  15  -2 229.792 280.393  15
  -3  15  -2-195.448 218.071   6
  -3  15  -2-538.396 338.433  10
  -3  15  -2-511.196 415.654  24
  -3  15  -3-76.9400 376.965  21
  -3  15  -3 337.641 311.338  10
  -3  15  -3 95.8960 212.149   6
  -3  15  -3 438.518 412.700  24
  -3  15  -3-80.6957 268.373  15
  -3  15  -4 284.991 202.467   6
  -3  15  -4-140.908 350.270  21
  -3  15  -4 160.405 403.072  24
  -3  15  -4 154.856 237.070  15
  -3  15  -4 171.880 306.855  10
  -3  15  -5 1233.95 389.614  21
  -3  15  -5 1993.55 277.586   6
  -3  15  -5 2608.61 347.299  10
  -3  15  -5 1517.69 421.026  24
  -3  15  -6-17.7651 160.043   6
  -3  15  -6 425.470 242.808  10
  -3  15  -7 364.180 135.078   6
  -3  15  -7 417.519 194.880  10
  -3  14  19 7.51794 208.593  29
  -3  14  19 169.775 150.391  19
  -3  14  18 78.8567 201.369  19
  -3  14  18-59.8322 224.812  34
  -3  14  17 99.4784 268.535  34
  -3  14  17 106.384 229.170  19
  -3  14  16 95.3019 304.879  34
  -3  14  15-218.226 328.655  34
  -3  14  15-208.806 258.443  24
  -3  14  14-36.3469 249.859  14
  -3  14  14 68.1770 292.126  24
  -3  14  14 9.41717 333.071  19
  -3  14  14 411.076 360.513  34
  -3  14  13 39.7811 333.384  19
  -3  14  13-166.719 273.506  14
  -3  14  13-28.2754 308.592  24
  -3  14  13-745.138 366.718  34
  -3  14  12 143.001 344.946  19
  -3  14  12 586.380 370.891  34
  -3  14  12 238.737 321.248  24
  -3  14  12 333.918 282.690  14
  -3  14  11-313.913 348.278  19
  -3  14  11 13.9916 332.154  24
  -3  14  11 177.765 275.575  14
  -3  14  11 399.096 362.724  34
  -3  14  10-76.9056 344.800  19
  -3  14  10-20.1721 358.834  34
  -3  14  10-79.3810 348.432  24
  -3  14   9 164.951 349.088  24
  -3  14   9 440.440 424.975   5
  -3  14   9 336.648 345.178  19
  -3  14   8 69.9358 391.228  28
  -3  14   8-152.078 371.339  24
  -3  14   8 29.3967 437.564   5
  -3  14   8-87.4299 322.783  19
  -3  14   7-11.1602 375.949  28
  -3  14   7 277.292 443.859   5
  -3  14   7-49.8516 312.027  19
  -3  14   7-104.928 373.859  24
  -3  14   6 260.104 447.490   5
  -3  14   6 143.987 376.967  24
  -3  14   6-645.115 373.436  28
  -3  14   5 2086.24 495.447  21
  -3  14   5 3141.00 483.673  24
  -3  14   5 2113.03 457.368  28
  -3  14   4 78.0524 400.770  24
  -3  14   4 263.269 421.711  21
  -3  14   4 24.1030 490.361   5
  -3  14   4 153.572 352.145  28
  -3  14   3 1088.84 437.309  24
  -3  14   3 1804.34 481.012  21
  -3  14   2 2375.16 369.385  15
  -3  14   2 1798.98 520.503  21
  -3  14   2 1599.52 481.714  24
  -3  14   2 2323.58 420.369  10
  -3  14   1 187.709 434.504  21
  -3  14   1-303.704 429.759  24
  -3  14   1 541.902 295.878  15
  -3  14   0 707.543 248.277   6
  -3  14   0-118.307 304.524  15
  -3  14   0 919.876 434.960  24
  -3  14   0 1087.88 441.141  21
  -3  14  -1 9.31376 251.318   6
  -3  14  -1 369.456 300.606  15
  -3  14  -1 768.321 443.899  24
  -3  14  -2 217.758 309.189  15
  -3  14  -2-257.941 347.923  10
  -3  14  -2-156.268 249.817   6
  -3  14  -2 242.453 451.095  24
  -3  14  -3 185.386 251.536   6
  -3  14  -3 586.078 307.017  15
  -3  14  -3 360.101 431.124  21
  -3  14  -3-451.722 443.582  24
  -3  14  -3-206.240 334.849  10
  -3  14  -4-72.3046 247.615   6
  -3  14  -4-37.9929 339.812  10
  -3  14  -4-795.646 413.635  21
  -3  14  -4-21.2308 289.490  15
  -3  14  -5 540.691 382.247  21
  -3  14  -5 363.989 232.784   6
  -3  14  -5 173.352 272.133  15
  -3  14  -5-134.881 326.466  10
  -3  14  -6-166.575 293.065  10
  -3  14  -6-177.981 329.338  21
  -3  14  -6 88.3325 205.566   6
  -3  14  -7 143.425 254.832  10
  -3  14  -7 350.568 285.823  21
  -3  14  -7-175.297 188.989   6
  -3  14  -8 64.0485 208.890  10
  -3  14  -8-150.522 175.001  31
  -3  14  -8 135.677 156.835   6
  -3  14  -9 23.2442 112.727   6
  -3  14  -9 27.2761 203.230  24
  -3  13  20 212.681 127.240  28
  -3  13  20 113.330 169.204  29
  -3  13  19 228.313 252.074  29
  -3  13  19 102.150 175.285  19
  -3  13  19 173.311 213.275  34
  -3  13  18-228.032 176.056  14
  -3  13  18 143.101 212.448  19
  -3  13  18-205.728 268.849  34
  -3  13  17 631.666 317.267  34
  -3  13  17 719.131 265.353  19
  -3  13  17 564.161 222.795  14
  -3  13  16 113.091 293.286  19
  -3  13  16-367.563 339.741  34
  -3  13  16 358.584 222.859  14
  -3  13  16 7.07191 250.270  24
  -3  13  15 659.228 326.096  19
  -3  13  15 650.837 292.725  24
  -3  13  15 513.791 383.545  34
  -3  13  14-371.494 395.380  34
  -3  13  14-337.789 313.490  24
  -3  13  13 283.055 406.063  34
  -3  13  13 605.736 341.124  24
  -3  13  13 1160.47 299.352  14
  -3  13  12 1776.27 374.790  24
  -3  13  12 973.896 432.114  34
  -3  13  12 1404.74 336.676  14
  -3  13  11 97.1955 367.931  19
  -3  13  11-213.007 405.263  34
  -3  13  11 344.100 356.201  24
  -3  13  11 931.750 299.656  14
  -3  13  10 4274.76 609.825   5
  -3  13  10 4076.20 565.191  19
  -3  13  10 3681.51 592.525  34
  -3  13  10 3656.01 557.868  24
  -3  13  10 4634.06 522.369  14
  -3  13   9 7547.43 810.023   5
  -3  13   9 6538.43 764.136  19
  -3  13   9 7095.29 766.233  24
  -3  13   9 6393.76 726.780  14
  -3  13   9 5012.89 773.572  34
  -3  13   8 84.3066 354.586  24
  -3  13   8 155.507 363.079  34
  -3  13   8 299.702 337.722  19
  -3  13   8 147.945 415.246   5
  -3  13   7 8684.74 1049.65  19
  -3  13   7 9083.53 1061.55  24
  -3  13   6 1617.81 412.791  28
  -3  13   6 1329.12 401.454  24
  -3  13   6 1491.68 354.390  19
  -3  13   6 2469.14 484.233   5
  -3  13   5 2838.30 502.148  28
  -3  13   5 3771.85 515.118  24
  -3  13   5 2308.74 531.592  21
  -3  13   4 1951.16 509.810   5
  -3  13   4 2424.62 428.890  24
  -3  13   4 1502.18 443.182  21
  -3  13   4 1456.44 398.994  28
  -3  13   3 1648.83 427.867  21
  -3  13   3-64.3988 388.211  24
  -3  13   3 1089.43 476.139   5
  -3  13   3 196.517 347.052  28
  -3  13   2 2903.44 506.789  21
  -3  13   2 2704.78 497.253  24
  -3  13   2 2367.78 500.572   3
  -3  13   1 1175.95 479.446  21
  -3  13   1 996.803 450.417   3
  -3  13   1 1336.46 436.014  24
  -3  13   1 1237.16 314.445  15
  -3  13   0 2119.01 358.526  15
  -3  13   0 2453.90 483.538   3
  -3  13   0 1045.38 315.081   6
  -3  13   0 2488.19 507.625  21
  -3  13   0 2168.33 483.080  24
  -3  13  -1 17668.4 1778.92  24
  -3  13  -1 15982.5 1734.56   6
  -3  13  -1 15913.5 1804.60   3
  -3  13  -1 17385.1 1752.79  10
  -3  13  -1 17034.6 1744.57  15
  -3  13  -2 146.881 440.480  21
  -3  13  -2-126.852 457.717  24
  -3  13  -2 390.360 263.359   6
  -3  13  -2-58.7023 312.810  15
  -3  13  -2-551.410 361.605  10
  -3  13  -3 2846.65 521.430  21
  -3  13  -3 1975.65 364.548   6
  -3  13  -3 2113.91 397.588  15
  -3  13  -3 2422.07 435.813  10
  -3  13  -4 219.462 443.607  21
  -3  13  -4-91.6336 324.155  15
  -3  13  -4 107.037 272.581   6
  -3  13  -4 240.074 344.719  10
  -3  13  -5 242.522 401.081  21
  -3  13  -5 512.324 272.864   6
  -3  13  -5 82.7841 346.264  10
  -3  13  -5 522.663 317.196  15
  -3  13  -6 226.845 249.845   6
  -3  13  -6-29.8391 290.381  15
  -3  13  -6-428.408 365.163  21
  -3  13  -6 258.204 326.252  10
  -3  13  -7 1989.82 366.174  10
  -3  13  -7 1340.21 394.821  21
  -3  13  -7 2054.10 308.365   6
  -3  13  -8 49.2037 201.578   6
  -3  13  -8 49.2388 367.698  24
  -3  13  -8 390.731 294.015  21
  -3  13  -8-349.470 267.098  10
  -3  13  -9 306.357 308.403  24
  -3  13  -9 477.545 183.760   6
  -3  13  -9 642.705 224.067  10
  -3  13 -10 129.094 133.990   6
  -3  12  20 21.2729 169.847  34
  -3  12  20 10.6037 124.274  19
  -3  12  19-155.071 180.400  19
  -3  12  19-105.113 154.465  14
  -3  12  19 106.270 243.828  34
  -3  12  18-112.559 219.773  19
  -3  12  18 122.208 297.615  34
  -3  12  18 3.55836 195.061  14
  -3  12  17-121.240 241.146  24
  -3  12  17-398.996 345.456  34
  -3  12  17 284.011 264.303  19
  -3  12  17 49.9255 215.710  14
  -3  12  16 1012.43 224.813   7
  -3  12  16 1127.99 322.323  19
  -3  12  16 2.73292 289.586  24
  -3  12  16 696.337 259.505  14
  -3  12  16 565.616 379.399  34
  -3  12  15 486.210 314.157  24
  -3  12  15 71.4969 335.438  19
  -3  12  15 317.886 226.594   7
  -3  12  15-481.509 392.653  34
  -3  12  15 400.427 263.133  14
  -3  12  14 337.753 323.899  24
  -3  12  14 161.626 416.385  34
  -3  12  14 386.459 237.969   7
  -3  12  13-2.10482 246.822   7
  -3  12  13 795.356 431.991  34
  -3  12  13 778.361 337.289  24
  -3  12  12-66.0486 429.125  34
  -3  12  12 660.587 352.508  24
  -3  12  11 50.9236 293.657  14
  -3  12  11-816.570 408.990   5
  -3  12  11-34.4824 423.438  34
  -3  12  11-443.229 348.501  24
  -3  12  10 487.986 410.178   5
  -3  12  10 721.282 302.453  14
  -3  12  10-488.007 417.036  34
  -3  12  10 764.284 349.815  24
  -3  12   9 552.657 420.060  34
  -3  12   9 2031.50 444.645   5
  -3  12   9 1432.93 329.955  14
  -3  12   9 1627.09 383.949  24
  -3  12   8 257.557 274.413  14
  -3  12   8 808.795 345.069  24
  -3  12   8 132.480 376.949  34
  -3  12   8-148.248 416.211   5
  -3  12   7 119.768 360.718  34
  -3  12   7 97.6686 339.327  24
  -3  12   7 92.9552 265.560  14
  -3  12   7-46.7022 405.424   5
  -3  12   7-186.739 327.151  19
  -3  12   6 3427.84 461.805  19
  -3  12   6 2392.67 482.021  24
  -3  12   5 3100.54 558.688  28
  -3  12   5 4341.26 556.803  24
  -3  12   5 4134.68 520.135  19
  -3  12   5 5474.00 625.946   5
  -3  12   5 4530.48 573.752  21
  -3  12   4 1126.61 393.901  21
  -3  12   4 738.170 363.638  24
  -3  12   4 626.406 354.217  28
  -3  12   3 214.364 382.617  21
  -3  12   3 747.279 336.092  28
  -3  12   3 800.322 379.666   3
  -3  12   3 596.779 450.698   5
  -3  12   3 1033.64 367.286  24
  -3  12   2 406.856 399.668   3
  -3  12   2 719.290 456.980   5
  -3  12   2 407.519 325.806  28
  -3  12   2 549.655 377.604  24
  -3  12   1 12.5452 404.889   3
  -3  12   1-351.663 381.951  24
  -3  12   0 184.424 431.024   3
  -3  12   0 72.0777 246.042   6
  -3  12   0-187.802 281.851  15
  -3  12   0 88.1784 406.143  24
  -3  12  -1 566.727 278.369   6
  -3  12  -1 649.668 455.569   3
  -3  12  -1 922.219 312.673  15
  -3  12  -1 851.876 437.454  24
  -3  12  -1 678.852 352.537  10
  -3  12  -2 544.489 438.069  21
  -3  12  -2 752.842 461.485  24
  -3  12  -2 773.785 470.887   3
  -3  12  -2 421.607 319.394  15
  -3  12  -2 692.237 287.608   6
  -3  12  -2 551.562 347.779  10
  -3  12  -3 90.1447 461.311   3
  -3  12  -3 198.079 323.596  15
  -3  12  -3-111.538 470.489  21
  -3  12  -3-68.0906 280.154   6
  -3  12  -3 1024.50 358.483  10
  -3  12  -4 161.072 463.532  21
  -3  12  -4 522.146 335.655  15
  -3  12  -4 145.763 363.063  10
  -3  12  -4 517.328 284.686   6
  -3  12  -5-18.2848 336.339  15
  -3  12  -5 240.357 425.218  21
  -3  12  -5 597.218 363.626  10
  -3  12  -5-336.096 275.140   6
  -3  12  -6-85.6403 352.108  10
  -3  12  -6-24.3073 283.042   6
  -3  12  -6-288.896 331.454  15
  -3  12  -6 252.414 486.113  24
  -3  12  -6 433.966 418.951  21
  -3  12  -7 569.187 333.935  10
  -3  12  -7 813.821 473.995  24
  -3  12  -7-81.3267 312.682  15
  -3  12  -7 240.271 384.415  21
  -3  12  -7 383.609 265.739   6
  -3  12  -8 363.495 347.975  21
  -3  12  -8 107.981 241.684   6
  -3  12  -8-77.5894 436.073  24
  -3  12  -8-360.829 315.742  10
  -3  12  -9-32.2569 285.743  21
  -3  12  -9 505.084 274.177  10
  -3  12  -9-338.412 378.127  24
  -3  12 -10-402.243 325.191  24
  -3  12 -10-114.488 208.434  10
  -3  11  20 126.530 129.075  19
  -3  11  20 51.0293 192.961  34
  -3  11  19-1.42107 165.952  14
  -3  11  19 168.744 262.035  34
  -3  11  19-64.4070 186.232  19
  -3  11  18 412.898 205.202  14
  -3  11  18 69.9815 173.368   7
  -3  11  18-48.6335 226.897  19
  -3  11  18 330.081 308.842  34
  -3  11  18-77.3361 214.119  24
  -3  11  17 347.341 198.332   7
  -3  11  17 511.172 226.511  14
  -3  11  17 96.2229 269.851  19
  -3  11  17 405.761 359.603  34
  -3  11  17 396.950 266.229  24
  -3  11  16 53.0138 404.585  34
  -3  11  16-17.1861 221.007   7
  -3  11  16 75.6140 242.823  14
  -3  11  16 228.344 303.144  24
  -3  11  16-249.109 301.666  19
  -3  11  15 26.0186 429.472  34
  -3  11  15-174.232 274.051  14
  -3  11  15-301.386 318.043  24
  -3  11  15 129.813 232.979   7
  -3  11  14 124.344 238.944   7
  -3  11  14 630.564 344.591  24
  -3  11  14-135.482 283.827  14
  -3  11  13-163.571 353.318  24
  -3  11  13 32.5844 458.286  34
  -3  11  13-129.107 305.951  14
  -3  11  13 385.404 251.440   7
  -3  11  12-243.661 246.300   7
  -3  11  12 462.421 438.992  34
  -3  11  12 315.005 403.838   5
  -3  11  12 163.238 353.713  24
  -3  11  11 463.663 353.781  24
  -3  11  11 400.371 247.214   7
  -3  11  11 41.5734 408.829   5
  -3  11  11 806.294 439.267  34
  -3  11  10 57.5058 234.386   7
  -3  11  10 366.675 420.967  34
  -3  11  10 489.174 392.428   5
  -3  11  10 180.823 282.971  14
  -3  11  10 224.827 345.871  24
  -3  11   9 1453.32 436.436  34
  -3  11   9 1751.99 338.299  14
  -3  11   9 2687.48 449.148   5
  -3  11   9 1647.92 391.864  24
  -3  11   9 1790.20 336.498   9
  -3  11   8 551.058 338.430  24
  -3  11   8 408.748 280.031   9
  -3  11   8 760.500 395.969   5
  -3  11   8 663.286 376.452  34
  -3  11   8 605.277 274.795  14
  -3  11   7 6362.85 776.299  14
  -3  11   7 7640.12 802.600  24
  -3  11   7 8012.07 840.817   5
  -3  11   6 7637.60 916.082  14
  -3  11   6 8012.11 940.129  24
  -3  11   5 5102.38 608.946   5
  -3  11   5 4115.02 558.638  24
  -3  11   4 8354.22 1042.52  24
  -3  11   4 9764.35 1049.92   3
  -3  11   4 11689.0 1078.72   5
  -3  11   3 438.381 323.490  24
  -3  11   3 615.476 396.969   5
  -3  11   3 1049.84 352.188   3
  -3  11   2 136.665 358.952   3
  -3  11   2 601.735 400.261   5
  -3  11   2 35.5796 328.050  24
  -3  11   1 250.672 376.505   3
  -3  11   1 333.987 420.565   5
  -3  11   1-448.497 340.909  24
  -3  11   0 243.988 361.188  24
  -3  11   0-165.844 237.934   6
  -3  11   0-116.355 392.051   3
  -3  11  -1 7494.31 879.249   3
  -3  11  -1 7054.90 792.397  15
  -3  11  -1 7217.18 847.036  24
  -3  11  -1 7314.35 786.993   6
  -3  11  -2 507.804 291.096  15
  -3  11  -2 288.954 264.627   6
  -3  11  -2 267.304 443.724   3
  -3  11  -2 646.891 336.612  10
  -3  11  -3 2388.50 386.836  15
  -3  11  -3 2686.12 539.887   3
  -3  11  -3 2137.43 359.413   6
  -3  11  -3 1964.37 408.106  10
  -3  11  -4 489.067 472.853   3
  -3  11  -4-7.89324 335.567  15
  -3  11  -4-457.610 344.981  10
  -3  11  -4 77.9686 282.533   6
  -3  11  -5 562.090 360.676  10
  -3  11  -5 289.749 471.374   3
  -3  11  -5 126.967 351.861  15
  -3  11  -5-307.788 471.043  24
  -3  11  -5 499.289 406.954  21
  -3  11  -5 337.483 294.774   6
  -3  11  -6-28.8529 352.939  10
  -3  11  -6-30.0984 476.543  24
  -3  11  -6-403.127 423.772  21
  -3  11  -6 109.031 292.029   6
  -3  11  -6 526.109 355.520  15
  -3  11  -7 1442.98 398.796  15
  -3  11  -7 1920.52 400.957  10
  -3  11  -7 2432.06 352.189   6
  -3  11  -7 1617.10 537.931  24
  -3  11  -7 1507.83 444.376  21
  -3  11  -8 97.4478 338.394  10
  -3  11  -8 200.356 330.829  15
  -3  11  -8 658.985 370.360  30
  -3  11  -8-279.182 493.650  24
  -3  11  -8 815.894 360.687  21
  -3  11  -9 3227.64 496.114  24
  -3  11  -9 1269.24 390.857  21
  -3  11  -9 3591.92 376.972  10
  -3  11 -10-328.762 286.464  30
  -3  11 -10 273.312 280.683  21
  -3  11 -10 263.406 390.788  24
  -3  11 -10 361.273 256.700  10
  -3  11 -11 579.081 335.797  24
  -3  11 -11 720.878 206.208   6
  -3  11 -12-17.0210 149.104   6
  -3  11 -13 58.1635 90.3083   6
  -3  10  20 142.793 124.188  14
  -3  10  19 108.286 183.245  19
  -3  10  19 233.304 168.111  14
  -3  10  18 500.060 205.445  14
  -3  10  18-174.453 242.007  24
  -3  10  18 285.696 232.884  19
  -3  10  17-270.570 268.773  19
  -3  10  17 352.073 383.252  34
  -3  10  17 122.962 233.982  14
  -3  10  17 53.1294 272.278  24
  -3  10  16 303.217 260.667  14
  -3  10  16 468.018 318.093  24
  -3  10  15-217.569 286.146  14
  -3  10  15 29.0703 328.305  24
  -3  10  14 552.840 362.138  24
  -3  10  14 173.073 302.546  14
  -3  10  14 716.595 252.488   7
  -3  10  13-107.841 250.644   7
  -3  10  13 187.658 293.496  14
  -3  10  13 85.2889 396.987   5
  -3  10  13 546.588 362.743  24
  -3  10  12 324.017 251.983   7
  -3  10  12 233.813 294.620  14
  -3  10  12 111.694 354.172  24
  -3  10  12 813.840 413.710   5
  -3  10  11-251.105 238.562   7
  -3  10  11 22.3146 345.153  24
  -3  10  11 203.607 401.836   5
  -3  10  10 644.493 237.743   7
  -3  10  10 1209.59 339.092  24
  -3  10  10 712.404 391.325   5
  -3  10   9 453.042 221.877   7
  -3  10   9 698.365 277.444  14
  -3  10   9 84.9003 321.671  24
  -3  10   9 217.008 393.545  34
  -3  10   9 759.684 376.035   5
  -3  10   8 1619.55 269.804   7
  -3  10   8 1486.83 314.905  14
  -3  10   8 1387.16 353.012  24
  -3  10   7 5235.91 655.629   5
  -3  10   6 2321.83 424.307   5
  -3  10   5 557.923 338.001   5
  -3  10   5 750.631 284.054   3
  -3  10   4 1109.19 359.952   5
  -3  10   4 1373.92 327.816   3
  -3  10   3 34.0820 299.382   3
  -3  10   3 919.717 344.727   5
  -3  10   2 1490.41 389.447   5
  -3  10   2 1317.39 355.000   3
  -3  10   1 1635.26 423.628   5
  -3  10   1 1826.07 381.993   3
  -3  10   0 2269.90 474.117   5
  -3  10   0 2517.37 442.686   3
  -3  10  -1 41.0738 377.082   3
  -3  10  -2 918.604 287.606  15
  -3  10  -2 1418.20 273.664   6
  -3  10  -2 1413.72 416.064   3
  -3  10  -3 584.160 258.126   6
  -3  10  -3-13.5071 420.942   3
  -3  10  -3-324.240 293.702  15
  -3  10  -3-189.200 309.691  10
  -3  10  -4-166.923 276.391   6
  -3  10  -4-315.346 315.273  15
  -3  10  -4-211.689 435.833   3
  -3  10  -4 365.187 322.381  10
  -3  10  -4-70.1249 434.918  24
  -3  10  -5-280.209 333.717  15
  -3  10  -5-8.36960 286.470   6
  -3  10  -5-16.3782 461.919  24
  -3  10  -5-96.1678 334.375  10
  -3  10  -6 461.924 358.381  10
  -3  10  -6 308.553 297.594   6
  -3  10  -6-521.957 472.125  24
  -3  10  -6 865.677 354.092  15
  -3  10  -7-41.5489 407.446  21
  -3  10  -7-142.263 363.786  15
  -3  10  -7 347.822 348.128  10
  -3  10  -7 1024.33 497.962  24
  -3  10  -8 296.738 372.190  21
  -3  10  -8-21.2123 507.083  24
  -3  10  -8 312.794 358.750  15
  -3  10  -8 447.716 346.154  10
  -3  10  -9 497.621 366.746  21
  -3  10  -9-111.010 416.844  30
  -3  10  -9-116.316 334.323  10
  -3  10  -9 225.854 472.445  24
  -3  10 -10-65.7982 314.710  21
  -3  10 -10 121.056 457.666  24
  -3  10 -10 413.478 259.872   6
  -3  10 -10-427.111 376.828  30
  -3  10 -10-963.774 297.936  10
  -3  10 -11 123.644 228.013   6
  -3  10 -11-166.609 326.779  30
  -3  10 -12 371.221 191.943   6
  -3  10 -12-185.015 270.525  30
  -3  10 -12 244.863 317.343  24
  -3  10 -13 75.5237 149.614   6
  -3   9  21-86.3911 128.696  34
  -3   9  20 191.761 121.964  14
  -3   9  20 51.1643 246.960  29
  -3   9  20 201.806 221.090  34
  -3   9  19 108.603 284.559  34
  -3   9  19-285.790 320.854  29
  -3   9  19-60.4856 175.004  19
  -3   9  19 306.233 200.511  24
  -3   9  19 100.044 164.291  14
  -3   9  18-316.747 225.189  19
  -3   9  18-52.7235 248.354  24
  -3   9  18-57.0852 201.246  14
  -3   9  17 155.575 235.311  14
  -3   9  17 9.06849 298.757  24
  -3   9  17 919.766 272.240  19
  -3   9  16 346.062 321.241  24
  -3   9  16 69.1924 259.096  14
  -3   9  15 455.156 273.708  14
  -3   9  15-102.563 350.192  24
  -3   9  14 2131.47 353.873  14
  -3   9  14 1070.22 429.714   5
  -3   9  14 1481.35 405.005  24
  -3   9  13-9.13317 303.430  14
  -3   9  13 530.635 371.675  24
  -3   9  13 458.640 403.211   5
  -3   9  12 2498.54 405.664  14
  -3   9  12 2660.18 482.616   5
  -3   9  12 2520.79 451.176  24
  -3   9  11-48.7724 233.309   7
  -3   9  11 80.3313 286.421  14
  -3   9  11-604.747 386.050   5
  -3   9  11-302.261 337.984  24
  -3   9  10 4827.29 601.469   7
  -3   9  10 5797.97 652.316  24
  -3   9  10 5472.59 626.781  14
  -3   9  10 6435.04 687.912   5
  -3   9   9-161.590 352.451   5
  -3   9   9-81.3844 208.225   7
  -3   9   8 6977.48 807.909   5
  -3   9   7-191.543 330.730   5
  -3   9   6 15717.2 1653.66   5
  -3   9   5 622.679 265.472   3
  -3   9   5 553.295 329.332   5
  -3   9   4 19766.6 2050.17   3
  -3   9   4 19847.3 2061.14   5
  -3   9   3 3465.27 458.685   3
  -3   9   3 3022.71 481.181   5
  -3   9   2 3755.76 518.253   3
  -3   9   2 4217.46 541.053   5
  -3   9   1-67.6040 346.133   5
  -3   9   1 306.830 315.949   3
  -3   9   0 14425.7 1525.18   3
  -3   9  -1 1981.31 395.213   3
  -3   9  -2 4966.17 630.316   3
  -3   9  -3 193.244 392.407   3
  -3   9  -3 921.769 290.976  10
  -3   9  -3 621.537 352.717  24
  -3   9  -4 4295.58 483.448   6
  -3   9  -4 4092.42 569.743  24
  -3   9  -4 3735.92 497.163  15
  -3   9  -4 3700.55 510.839  10
  -3   9  -5 863.342 420.361  24
  -3   9  -5 44.4639 275.947   6
  -3   9  -5-244.110 315.135  10
  -3   9  -5 171.653 312.232  15
  -3   9  -6 4215.85 576.473   3
  -3   9  -6 2625.06 469.787  15
  -3   9  -6 2858.49 464.192  10
  -3   9  -6 2440.34 567.004  24
  -3   9  -6 3646.61 440.385   6
  -3   9  -7 413.225 343.092  10
  -3   9  -7-176.366 491.906  24
  -3   9  -7 527.315 468.594   3
  -3   9  -7-30.6914 367.408  15
  -3   9  -8 47.1603 398.634  21
  -3   9  -8 312.983 492.237  24
  -3   9  -8-82.8261 375.743  15
  -3   9  -8 8.96453 345.895  10
  -3   9  -8-760.636 469.845   3
  -3   9  -9 110.236 376.708  21
  -3   9  -9 895.270 520.219  24
  -3   9  -9 418.302 295.429   6
  -3   9  -9 663.950 361.311  15
  -3   9  -9 127.177 340.446  10
  -3   9 -10-9.66839 336.262  21
  -3   9 -10 389.943 275.459   6
  -3   9 -10 984.955 490.894  24
  -3   9 -10 184.180 318.760  10
  -3   9 -10-400.745 443.858  30
  -3   9 -11 373.206 450.084  24
  -3   9 -11-175.901 405.387  30
  -3   9 -11-126.812 254.528   6
  -3   9 -12-74.4324 221.713   6
  -3   9 -12 365.446 359.561  30
  -3   9 -12 591.406 384.190  24
  -3   9 -13-263.568 292.043  30
  -3   9 -13 194.540 190.288   6
  -3   9 -14 176.462 208.525  30
  -3   9 -14 147.646 144.765   6
  -3   8  21-38.1007 130.779  34
  -3   8  20 220.067 127.967   7
  -3   8  20 141.649 253.257  29
  -3   8  20 132.306 227.146  34
  -3   8  20 229.756 114.912  14
  -3   8  19 27.3246 161.227   7
  -3   8  19-308.952 295.878  34
  -3   8  19-103.221 204.441  24
  -3   8  19-303.054 335.659  29
  -3   8  19-35.4451 160.031  14
  -3   8  18-42.8192 212.250  19
  -3   8  18 144.311 198.346  14
  -3   8  18-65.4000 193.675   7
  -3   8  18 152.135 257.453  24
  -3   8  17-191.843 303.430  24
  -3   8  17-537.723 234.032  14
  -3   8  17-340.090 254.219  19
  -3   8  17-126.485 218.866   7
  -3   8  16 69.4829 327.322  24
  -3   8  16 140.195 234.199   7
  -3   8  16-68.1535 261.487  14
  -3   8  15 1575.84 331.879  14
  -3   8  14 958.760 407.869   5
  -3   8  14 847.331 307.406  14
  -3   8  13 562.204 403.990   5
  -3   8  13 462.845 303.217  14
  -3   8  12 215.615 292.052  14
  -3   8  12 1037.71 395.516   5
  -3   8  11 774.529 291.778  14
  -3   8  11 941.460 385.658   5
  -3   8  10 847.895 285.238  14
  -3   8  10 1572.85 373.521   5
  -3   8   9 6898.39 801.014   5
  -3   8   8-10.4655 330.956   5
  -3   8   7 6942.20 796.548   5
  -3   8   6 2626.72 357.191   3
  -3   8   6 2394.52 427.479   5
  -3   8   5 4146.27 526.808   5
  -3   8   5 3735.07 479.344   3
  -3   8   4 317.031 289.620   3
  -3   8   4 520.198 334.404   5
  -3   8   3 83326.4 8532.09   3
  -3   8   3 83984.2 8537.62   5
  -3   8   2 376.433 335.768   5
  -3   8   2 160.569 313.213   3
  -3   8   1-34.0923 321.248   3
  -3   8   0 1650.16 365.538   3
  -3   8  -1 1136.77 344.114   3
  -3   8  -2 553.856 369.068   5
  -3   8  -2 203.881 325.648   3
  -3   8  -5-191.232 376.611  24
  -3   8  -5 168.531 379.064   3
  -3   8  -5 280.326 287.220  15
  -3   8  -5 168.762 288.121  10
  -3   8  -5 775.244 243.204   6
  -3   8  -6-617.044 409.837  24
  -3   8  -6-283.561 391.776   3
  -3   8  -6 338.312 322.545  15
  -3   8  -6 63.3543 300.960  10
  -3   8  -7 646.510 367.010  15
  -3   8  -7 1457.70 346.978  10
  -3   8  -7 751.486 482.090  24
  -3   8  -7 1445.53 449.739   3
  -3   8  -8 464.244 295.102   6
  -3   8  -8 893.155 367.805  15
  -3   8  -8 737.898 459.422   3
  -3   8  -8-498.866 491.139  24
  -3   8  -8-268.133 350.060  10
  -3   8  -9 1577.80 414.021  21
  -3   8  -9 1145.86 546.679  24
  -3   8  -9 1919.95 517.475   3
  -3   8  -9 2406.15 363.136   6
  -3   8  -9 1938.55 400.621  10
  -3   8  -9 1511.24 432.183  15
  -3   8 -10 701.755 331.375  10
  -3   8 -10-16.9326 340.592  21
  -3   8 -10 28.3940 288.867   6
  -3   8 -10 312.122 503.871  24
  -3   8 -11 309.813 276.912   6
  -3   8 -11 104.006 471.066  24
  -3   8 -12-38.1225 255.567   6
  -3   8 -12-141.439 419.692  30
  -3   8 -12-921.782 430.348  24
  -3   8 -13-458.155 221.408   6
  -3   8 -13 348.993 364.305  30
  -3   8 -13-340.132 360.154  24
  -3   8 -14 392.256 299.468  30
  -3   8 -14 241.661 181.471   6
  -3   8 -15 29.7748 216.588  30
  -3   8 -15 76.8260 129.703   6
  -3   7  21-25.0834 75.0567   7
  -3   7  20 663.974 140.465   7
  -3   7  20 255.942 226.299  34
  -3   7  19 12.4564 153.252  14
  -3   7  19 196.545 157.914   7
  -3   7  19 50.3601 215.441  24
  -3   7  19 32.2008 290.519  34
  -3   7  18 1041.10 309.778  24
  -3   7  18 1356.54 244.172  14
  -3   7  18 1519.28 244.998   7
  -3   7  17 608.022 252.826  19
  -3   7  17 752.185 244.094  14
  -3   7  17 928.482 239.826   7
  -3   7  16-94.0560 250.094  14
  -3   7  16 6.46194 238.542   7
  -3   7  15 105.501 276.081  14
  -3   7  14 1309.00 512.017  34
  -3   7  14 1339.27 320.855  14
  -3   7  14 840.265 414.035   5
  -3   7  13 1696.05 424.786   5
  -3   7  13 1271.20 324.261  14
  -3   7  12 4026.79 543.487   5
  -3   7  12 3253.72 467.539  14
  -3   7  11 404.331 260.363  14
  -3   7  11 62.0113 356.092   5
  -3   7  10 4411.49 576.578   5
  -3   7   9 52.8161 309.958   5
  -3   7   8 2629.27 422.329   5
  -3   7   7 4948.66 609.654   5
  -3   7   6 5875.76 705.913   5
  -3   7   6 6159.79 669.979   3
  -3   7   5 194.516 262.240   3
  -3   7   5-81.2792 347.669   5
  -3   7   4 1748.07 337.072   3
  -3   7   4 1544.84 383.902   5
  -3   7   3 1903.55 385.431   3
  -3   7   3 2199.50 411.769   5
  -3   7   2-203.544 330.017   3
  -3   7   1 345.595 328.422   3
  -3   7   0 8020.90 894.488   3
  -3   7  -1 200.084 192.221   1
  -3   7  -1 123.111 324.850   3
  -3   7  -1 160.533 354.050   5
  -3   7  -2 4476.23 553.604   3
  -3   7  -2 4196.54 482.791   1
  -3   7  -2 3756.57 572.411   5
  -3   7  -3 42.5883 227.448   1
  -3   7  -4-203.090 244.733   1
  -3   7  -4 20.0743 323.190   3
  -3   7  -5 1263.24 365.829   3
  -3   7  -5 823.472 301.765   1
  -3   7  -5 1552.16 276.225   2
  -3   7  -6 10288.5 1194.90  15
  -3   7  -6 13811.3 1239.15   3
  -3   7  -6 12037.6 1207.90   1
  -3   7  -6 10080.2 1220.20  24
  -3   7  -7 82.8141 323.362  15
  -3   7  -7 93.1137 261.942   6
  -3   7  -7 82.7738 406.271   3
  -3   7  -7-256.875 330.804   1
  -3   7  -7 36.7037 294.182  10
  -3   7  -7-43.5565 422.790  24
  -3   7  -8 1271.86 451.086   3
  -3   7  -8 1505.55 306.927   6
  -3   7  -8 1162.13 380.937  15
  -3   7  -8 801.468 338.462  10
  -3   7  -8 1508.50 391.618   1
  -3   7  -8 613.305 474.260  24
  -3   7  -9 990.131 453.467   3
  -3   7  -9 283.681 296.535   6
  -3   7  -9 267.829 342.757  10
  -3   7  -9 685.094 386.597  15
  -3   7  -9 362.739 506.101  24
  -3   7 -10 3059.80 403.600   6
  -3   7 -10 2270.06 464.118  15
  -3   7 -10 3069.69 531.881   3
  -3   7 -10 2066.50 425.367  10
  -3   7 -10 2171.64 569.809  24
  -3   7 -11 603.854 292.772   6
  -3   7 -11 258.511 507.117  24
  -3   7 -12 709.981 273.513   6
  -3   7 -12 511.742 466.680  30
  -3   7 -12-176.278 460.136  24
  -3   7 -13 381.827 247.081   6
  -3   7 -13 408.743 420.556  30
  -3   7 -13 6.91965 405.745  24
  -3   7 -14-14.7413 213.311   6
  -3   7 -14 333.005 370.465  30
  -3   7 -15 69.4611 166.769   6
  -3   7 -15 419.850 298.835  30
  -3   7 -16-3.13393 210.573  30
  -3   6  21-19.3399 68.9077   7
  -3   6  20 57.3743 121.699   7
  -3   6  20-40.3015 212.672  34
  -3   6  19 230.998 162.518   7
  -3   6  19-353.552 327.395  29
  -3   6  19-270.218 222.107  24
  -3   6  18 91.4633 190.104   7
  -3   6  18 215.226 183.729  14
  -3   6  17 241.519 216.545  14
  -3   6  16 415.378 263.999  19
  -3   6  16-254.703 242.923  14
  -3   6  15 48.0407 264.118  14
  -3   6  15-302.334 489.168  34
  -3   6  14 6812.56 801.558   5
  -3   6  14 7359.23 722.436  14
  -3   6  13-173.671 279.453  14
  -3   6  13 358.157 409.440   5
  -3   6  12 957.763 397.121   5
  -3   6  12 445.080 278.558  14
  -3   6  11 270.528 257.106  14
  -3   6  11 6.31694 360.275   5
   3  -6 -11 83.2840 328.556   2
   3  -6 -10 602.799 309.147   2
  -3   6  10 666.734 345.846   5
   3  -6  -9 4113.42 574.326   2
  -3   6   9 5645.34 602.080   5
  -3   6   8 508.298 326.950   5
   3  -6  -8 308.406 271.620   2
   3  -6  -7 1032.05 309.927   2
  -3   6   7 1819.35 266.702   3
  -3   6   7 1685.35 364.273   5
  -3   6   6 5214.46 660.157   5
  -3   6   6 5638.56 615.269   3
  -3   6   5 25262.4 2547.85   3
  -3   6   5 24009.9 2561.56   5
  -3   6   4 600.071 279.027   3
  -3   6   4 377.871 139.266   2
  -3   6   4 567.077 329.946   5
  -3   6   3 29506.3 3030.14   3
  -3   6   2 23233.9 2394.15   3
  -3   6   1 2061.12 382.261   3
  -3   6   0 6335.54 705.369   3
  -3   6   0 5673.24 707.776   5
  -3   6  -1 10119.3 1000.79   1
  -3   6  -1 8594.33 993.524   2
  -3   6  -1 11721.3 1049.67   3
  -3   6  -1 10611.6 1054.97   5
  -3   6  -2 146.633 225.370   1
  -3   6  -2-124.917 204.968   2
  -3   6  -2 177.709 367.152   5
  -3   6  -3 902.208 254.510   1
  -3   6  -3 550.730 231.331   2
  -3   6  -3 743.855 379.350   5
  -3   6  -4 142.320 235.907   2
  -3   6  -4-111.641 262.473   1
  -3   6  -4 383.264 324.743   3
  -3   6  -5 1190.08 361.308   3
  -3   6  -5 1334.94 293.716   2
  -3   6  -5 1842.90 312.944   1
  -3   6  -6 600.719 291.748   1
  -3   6  -6 605.448 345.891   3
  -3   6  -6 295.994 268.789   2
  -3   6  -7 559.650 325.847   1
  -3   6  -7 925.383 305.178   2
  -3   6  -7 743.513 363.163   3
  -3   6  -7 989.912 249.222   6
  -3   6  -8-333.136 318.624   2
  -3   6  -8 204.652 339.448   1
  -3   6  -8-418.324 398.307   3
  -3   6  -8-49.3724 292.678  10
  -3   6  -8-216.933 334.662  15
  -3   6  -8 165.139 419.518  24
  -3   6  -8-130.969 258.233   6
  -3   6  -9 114.694 339.192   2
  -3   6  -9 586.791 277.450   6
  -3   6  -9 74.9879 365.573  15
  -3   6  -9 192.235 369.637   1
  -3   6  -9 534.874 475.553  24
  -3   6  -9 980.525 434.286   3
  -3   6 -10 209.178 356.068   2
  -3   6 -10 247.682 288.145   6
  -3   6 -10 518.074 436.671   3
  -3   6 -10 460.180 393.203  15
  -3   6 -10 518.138 398.049   1
  -3   6 -10 793.299 506.695  24
  -3   6 -11 4315.56 505.973   6
  -3   6 -11 3870.47 582.673   1
  -3   6 -11 3321.83 601.030   3
  -3   6 -11 3426.78 653.148  24
  -3   6 -12 568.951 482.284  24
  -3   6 -12-158.735 285.430   6
  -3   6 -13 582.263 444.408  24
  -3   6 -13 12.3403 259.473   6
  -3   6 -13 56.6160 467.286  30
  -3   6 -14-133.727 412.435  30
  -3   6 -14-379.339 241.916   6
  -3   6 -15 246.209 190.677   6
  -3   6 -15 487.387 362.222  30
  -3   6 -16-32.6148 287.521  30
  -3   6 -16-190.425 147.139   6
  -3   6 -17-107.675 193.287  30
  -3   5  20 214.936 194.010  34
  -3   5  20-256.724 117.818   7
  -3   5  19 218.863 155.622   7
  -3   5  19 224.826 222.385  24
  -3   5  18 1370.04 243.862   7
  -3   5  17 387.295 207.520  14
   3  -5 -17 180.712 350.705  30
  -3   5  16-90.6645 431.280  34
   3  -5 -16-197.623 384.464  30
  -3   5  16 429.329 238.020  14
  -3   5  15-43.0405 254.903  14
   3  -5 -14-176.857 407.991   2
   3  -5 -14 412.680 422.549  30
  -3   5  14-122.596 266.256  14
  -3   5  14 328.687 404.169   5
   3  -5 -13 4928.90 663.445   2
  -3   5  13 4828.00 668.515   5
  -3   5  13 4945.90 580.616  14
  -3   5  12 1960.38 449.260   5
  -3   5  12 1672.66 332.107  14
   3  -5 -12 2066.99 425.540   2
   3  -5 -11 988.328 389.147   2
  -3   5  11 2140.68 400.156   5
  -3   5  10 3357.05 481.386   5
   3  -5 -10 2940.64 461.170   2
   3  -5  -9 338.453 315.664   2
  -3   5   9 688.843 326.271   5
   3  -5  -8 7051.44 873.808   2
  -3   5   8 8849.64 887.459   5
   3  -5  -7 20222.3 2194.50   2
  -3   5   7 22578.9 2206.58   5
  -3   5   6 2088.83 393.440   5
   3  -5  -6 1580.88 349.655   2
  -3   5   5 11943.3 1212.64   3
   3  -5  -5 11117.4 1213.26   2
  -3   5   5 11656.1 1234.14   5
  -3   5   4 11571.3 1072.38   3
   3  -5  -4 9280.13 1059.04   2
  -3   5   3 63202.9 5461.00   3
  -3   5   3 50464.3 5450.11   2
  -3   5   2 49112.5 4068.28   3
  -3   5   2 38332.1 4053.56   2
  -3   5   1 109158. 10793.0   3
  -3   5   1 105155. 10781.4   2
  -3   5   1 109761. 10794.7   5
  -3   5   0 4705.28 523.557   3
  -3   5   0 5200.16 524.513   5
  -3   5   0 4180.08 458.794   2
  -3   5  -1 36474.3 3657.69   5
  -3   5  -1 37268.7 3640.02   2
  -3   5  -1 33887.3 3639.94   1
  -3   5  -2 4195.66 471.339   2
  -3   5  -2 4166.36 482.766   1
  -3   5  -2 4117.52 553.322   5
  -3   5  -3 7166.73 733.803   2
  -3   5  -3 6556.32 744.990   1
  -3   5  -3 6410.58 800.327   5
  -3   5  -3 6493.83 775.141   3
  -3   5  -4 22092.6 2198.07   2
  -3   5  -4 20951.7 2200.86   1
  -3   5  -4 20693.4 2213.40   3
  -3   5  -5 20073.3 2081.32   3
  -3   5  -5 19734.3 2065.46   2
  -3   5  -5 20278.5 2070.05   1
  -3   5  -6 934.962 307.456   1
  -3   5  -6 889.198 339.714   3
  -3   5  -6 893.437 282.692   2
  -3   5  -7 1464.69 364.688   1
  -3   5  -7 2263.55 352.682   2
  -3   5  -7 2185.07 391.202   3
  -3   5  -8 1905.30 382.572   1
  -3   5  -8 1746.71 358.417   2
  -3   5  -8 1604.42 417.408   3
  -3   5  -9 2156.82 348.928   6
  -3   5  -9 2155.95 414.598   2
  -3   5  -9 1837.26 413.198  15
  -3   5  -9 2884.46 472.534   3
  -3   5  -9 2551.22 506.884  24
  -3   5  -9 2438.09 442.294   1
  -3   5 -10 417.215 424.347   3
  -3   5 -10 318.437 394.226   1
  -3   5 -10 741.497 480.534  24
  -3   5 -10 384.960 389.704  15
  -3   5 -10 1146.96 284.709   6
  -3   5 -10 1083.71 379.597   2
  -3   5 -11 2606.48 466.265   1
  -3   5 -11 1790.08 348.879   6
  -3   5 -11 1745.75 467.242   3
  -3   5 -11 1857.50 441.247   2
  -3   5 -11 1579.00 546.130  24
  -3   5 -12 939.018 419.473   1
  -3   5 -12-42.9864 277.712   6
  -3   5 -12 187.343 376.372   2
  -3   5 -12 44.2280 412.559   3
  -3   5 -12 374.450 487.306  24
  -3   5 -13 855.101 279.048   6
  -3   5 -13 506.987 468.233  24
  -3   5 -14 318.388 243.650   6
  -3   5 -14 514.487 476.655  30
  -3   5 -15 2134.09 307.810   6
  -3   5 -16 371.234 175.572   6
  -3   4  20-6.67032 107.148   7
  -3   4  20-234.756 166.622  34
  -3   4  19 78.7819 149.274   7
   3  -4 -18 108.642 302.114  30
  -3   4  18 221.557 364.504  29
  -3   4  17-227.306 409.040  29
   3  -4 -17-133.651 366.915  30
  -3   4  16 172.283 220.691  14
  -3   4  16 20.5972 425.024  34
  -3   4  15 1138.92 258.360  14
   3  -4 -15-149.903 441.329  30
  -3   4  14 90.7011 259.515  14
   3  -4 -14-423.658 422.367   2
   3  -4 -14-300.210 448.871  30
  -3   4  14 632.248 428.786   5
   3  -4 -14-415.155 415.130   1
  -3   4  13 657.464 267.901  14
   3  -4 -13 1031.47 421.343   2
   3  -4 -12-416.688 433.913  30
   3  -4 -12 152.561 376.989   2
   3  -4 -11 553.374 357.556   2
   3  -4 -10 445.373 330.436   2
   3  -4  -9 1798.38 382.924   2
   3  -4  -8 2133.32 410.732   2
   3  -4  -7 4163.35 550.822   2
   3  -4  -6 140.090 342.784   2
  -3   4   6 173.809 340.079   5
   3  -4  -5 142.101 282.704   2
   3  -4  -4 11489.5 1193.76   2
   3  -4  -3 1115.68 194.433   2
  -3   4   3 1272.50 226.369   3
  -3   4   2 6383.96 649.251   3
  -3   4   2 5861.57 627.306   2
  -3   4   2 6002.56 654.869   5
  -3   4   1 28587.2 2972.18   5
  -3   4   1 29464.6 2969.39   3
  -3   4   1 28995.4 2959.96   2
  -3   4   0 5572.69 611.693   5
  -3   4   0 5911.99 610.112   3
  -3   4   0 5435.44 579.666   2
  -3   4  -1 1575.08 198.064   2
  -3   4  -1 1450.73 265.825   5
  -3   4  -1 1284.31 182.115   1
  -3   4  -2 596.110 246.748   5
  -3   4  -2 385.306 161.947   1
  -3   4  -2 310.774 173.383   2
  -3   4  -3 4065.33 441.032   2
  -3   4  -3 3190.44 505.247   5
  -3   4  -3 3780.38 449.440   1
  -3   4  -3 3719.79 486.831   3
  -3   4  -4 1803.02 373.131   3
  -3   4  -4 1491.80 313.048   2
  -3   4  -4 1903.81 333.106   1
  -3   4  -5 577.811 294.241   2
  -3   4  -5 759.998 338.578   3
  -3   4  -5 574.724 311.515   1
  -3   4  -6 497.342 304.665   1
  -3   4  -6-232.989 326.115   3
  -3   4  -6-23.4718 279.348   2
  -3   4  -7 13024.7 1459.87   2
  -3   4  -7 14774.4 1470.05   1
  -3   4  -7 14221.3 1472.35   3
  -3   4  -8-225.479 335.672   3
  -3   4  -8-437.462 317.558   1
  -3   4  -8 32.5255 293.584   2
  -3   4  -9 1409.81 343.493   2
  -3   4  -9 1087.75 374.710   1
  -3   4  -9 471.857 361.259   3
  -3   4 -10-9.56657 252.359   6
  -3   4 -10 64.7032 385.249   1
  -3   4 -10 752.674 358.460   2
  -3   4 -10 715.963 383.990   3
  -3   4 -10 997.825 446.217  24
  -3   4 -11 4950.21 684.120  24
  -3   4 -11 4571.28 619.065   2
  -3   4 -11 4205.28 621.378   3
  -3   4 -11 4055.54 534.666   6
  -3   4 -11 5095.84 633.510   1
  -3   4 -12 507.649 413.903   1
  -3   4 -12 265.468 488.943  24
  -3   4 -12-155.944 272.577   6
  -3   4 -12-149.309 401.585   2
  -3   4 -12 474.390 413.068   3
  -3   4 -13 926.835 291.718   6
  -3   4 -13 1121.53 489.850  24
  -3   4 -14-181.057 250.955   6
  -3   4 -15 157.655 219.924   6
  -3   4 -16 371.272 193.558   6
  -3   4 -18-154.026 238.190  30
  -3   3  20 163.619 94.2580   7
  -3   3  19 193.112 139.580   7
   3  -3 -19-142.157 235.980  30
   3  -3 -18-109.008 309.678  30
  -3   3  17 648.444 395.958  29
  -3   3  16-112.483 413.117  34
   3  -3 -16 1293.17 420.379  30
  -3   3  16 335.267 429.361  29
   3  -3 -15 108.524 452.974  30
   3  -3 -14 600.712 426.143   1
  -3   3  14 774.746 262.611  14
   3  -3 -14 1420.73 477.094  30
   3  -3 -14 1088.09 440.846   2
   3  -3 -13 74.7809 415.236   2
   3  -3 -13-92.9317 414.937   1
   3  -3 -13-155.633 480.505  30
   3  -3 -12 123.158 442.575  30
   3  -3 -12 159.222 403.852   2
   3  -3 -11 5853.61 748.720   2
  -3   3  11 6436.31 714.059  11
   3  -3 -10 7900.01 890.603   2
   3  -3  -9 4233.28 559.812   2
   3  -3  -8 5662.38 691.566   2
   3  -3  -7 34567.1 3553.32   2
   3  -3  -6 7177.86 819.266   2
   3  -3  -5 148797. 15163.0   2
   3  -3  -4 62434.7 6368.31   2
  -3   3   3 9691.70 996.132   5
   3  -3  -3 9351.04 986.943   2
   3  -3  -2 7205.59 760.373   2
  -3   3   2 7466.67 774.278   5
  -3   3   1 7538.85 781.336   2
  -3   3   1 6975.90 794.504   3
  -3   3   1 8243.11 797.755   5
  -3   3   0 56009.2 5527.76   5
  -3   3   0 53402.5 5521.51   2
  -3   3  -1 23639.2 2532.36   1
  -3   3  -1 26353.8 2536.86   2
  -3   3  -1 28034.2 2545.62   5
  -3   3  -2 6722.11 746.041   5
  -3   3  -2 7079.71 727.724   1
  -3   3  -2 6724.46 731.516   2
  -3   3  -2 7498.22 746.963   3
  -3   3  -3 4664.58 563.892   5
  -3   3  -3 5132.78 563.611   3
  -3   3  -3 5143.61 545.318   2
  -3   3  -4 39688.7 4123.15   2
  -3   3  -4 41372.8 4130.01   3
  -3   3  -5 30513.6 3094.14   3
  -3   3  -5 29788.4 3085.13   2
  -3   3  -6 24521.8 2442.08   3
  -3   3  -6 22968.0 2432.61   2
  -3   3  -7 5862.74 654.880   2
  -3   3  -7 5337.16 666.186   3
  -3   3  -8 4584.47 567.791   3
  -3   3  -8 4313.32 545.286   2
  -3   3  -9 1235.64 351.094   3
  -3   3  -9 1029.16 317.820   2
  -3   3 -10 336.825 363.136   1
  -3   3 -10-184.812 228.476   6
  -3   3 -10-266.937 336.824   2
  -3   3 -10 286.296 345.846   3
  -3   3 -11 2173.82 462.326   2
  -3   3 -11 2671.40 466.735   3
  -3   3 -11 2549.34 365.068   6
  -3   3 -11 2413.63 494.572   1
  -3   3 -11 3112.62 529.595  24
  -3   3 -12 7836.07 861.845   6
  -3   3 -12 8413.10 930.826   2
  -3   3 -12 6650.12 950.082  24
  -3   3 -12 8887.99 947.674   1
  -3   3 -12 7933.72 916.328   3
  -3   3 -13 340.423 274.057   6
  -3   3 -13-261.836 407.354   2
  -3   3 -13 406.246 476.253  24
  -3   3 -13 78.4571 434.166   1
  -3   3 -14 2403.99 368.250   6
  -3   3 -15 759.006 250.074   6
  -3   3 -15 399.600 495.694  30
  -3   3 -16 1107.80 438.364  30
  -3   3 -16 89.7422 202.896   6
  -3   3 -17 16.2430 362.354  30
  -3   3 -18 381.094 293.114  30
  -3   3 -19-111.757 192.694  30
  -3   2  19-91.9423 125.915   7
  -3   2  19 207.343 195.181  34
   3  -2 -19 167.522 228.742  30
   3  -2 -18-261.904 306.871  30
  -3   2  16-463.850 392.469  34
   3  -2 -16 44.0580 418.723  30
  -3   2  15-260.227 456.116  29
   3  -2 -15 75.5489 463.085  30
   3  -2 -14-290.840 433.588   1
   3  -2 -14 151.855 433.247   2
   3  -2 -14 83.6239 482.105  30
   3  -2 -13 96.1354 423.991   1
   3  -2 -13-199.079 498.830  30
   3  -2 -13-616.922 430.735   2
   3  -2 -12 3474.06 505.193   2
   3  -2 -12 1822.63 547.324  30
   3  -2 -12 2572.58 488.427   1
  -3   2  12 2450.29 416.411  11
   3  -2 -11 2418.15 562.335  30
   3  -2 -11 4123.03 518.983   2
  -3   2  11 3113.11 445.708  11
   3  -2 -10 27.0705 337.852   2
   3  -2  -9 5408.00 662.519   2
   3  -2  -8 515.185 358.622   2
   3  -2  -7 10833.5 1177.40   2
   3  -2  -6 90.7529 356.590   2
   3  -2  -5 361.591 275.474   2
   3  -2  -4-142.278 229.607   2
   3  -2  -3-19.0788 189.836   2
  -3   2   2 1891.37 268.053   5
   3  -2  -2 1897.93 255.633   2
  -3   2   1 12316.0 1272.43   5
   3  -2   0 29160.7 3255.35   4
  -3   2   0 35997.2 3260.05   2
  -3   2   0 37430.2 3264.89   5
  -3   2  -1 15532.7 1460.83   5
   3  -2   1 13489.1 1446.86   4
  -3   2  -1 15050.7 1454.58   2
  -3   2  -1 14829.2 1461.40   3
  -3   2  -2-77.6640 176.925   3
  -3   2  -2 321.591 140.962   2
  -3   2  -2 179.761 171.521   5
  -3   2  -3 57272.5 5810.05   3
  -3   2  -3 55961.6 5809.80   5
  -3   2  -3 57422.4 5806.57   2
  -3   2  -4 9436.93 1014.51   3
  -3   2  -4 10078.9 1009.69   2
  -3   2  -4 9351.10 1020.56   5
  -3   2  -5 4089.95 474.730   3
  -3   2  -5 3551.71 460.479   2
  -3   2  -6 479.309 325.327   3
  -3   2  -6-46.9990 285.409   2
  -3   2  -7 11522.4 1262.97   2
  -3   2  -7 12493.9 1275.12   3
  -3   2  -8-319.866 323.608   3
  -3   2  -8-375.199 295.249   2
  -3   2  -9 188.054 292.936   2
  -3   2  -9 41.4246 312.420   3
  -3   2 -10 1140.86 337.514   3
  -3   2 -10 352.289 311.569   2
  -3   2 -11-74.8342 337.138   2
  -3   2 -11 188.454 229.631   6
  -3   2 -11 393.216 339.022   3
  -3   2 -11 365.999 414.653  24
   3  -2  11 227.620 283.426  11
  -3   2 -12-205.067 351.890   3
  -3   2 -12-198.383 389.384   2
  -3   2 -12 111.847 247.437   6
  -3   2 -12 602.639 422.148   1
  -3   2 -12 156.453 445.627  24
  -3   2 -13 2930.46 396.671   6
   3  -2  13 2370.61 427.844  11
  -3   2 -13 3316.70 525.177   2
  -3   2 -13 2695.60 555.243  24
  -3   2 -13 2701.59 553.190   1
  -3   2 -14 441.412 440.328   1
  -3   2 -14-534.386 263.713   6
  -3   2 -14-651.194 423.046   2
  -3   2 -15 124.113 237.122   6
  -3   2 -16 224.390 449.494  30
  -3   2 -17 205.222 395.229  30
  -3   2 -18-177.837 329.212  30
  -3   2 -19 366.741 254.641  30
   3  -1 -19 131.450 212.245  30
  -3   1  19-0.71907 107.491   7
   3  -1 -19 128.696 151.474  16
   3  -1 -18 115.147 295.854  30
  -3   1  16-74.0834 360.639  34
   3  -1 -16-23.8110 414.719  30
   3  -1 -15 867.781 476.153  30
   3  -1 -14 2194.22 483.528   1
   3  -1 -14 1866.80 533.072  30
  -3   1  14 759.259 483.204  29
   3  -1 -14 2066.71 480.518   2
   3  -1 -13-333.261 443.735   1
   3  -1 -13-166.988 500.883  30
   3  -1 -13-223.546 435.908   2
   3  -1 -12 9013.61 1125.39  30
   3  -1 -12 10108.9 1107.05   1
   3  -1 -12 10013.5 1104.04   2
   3  -1 -11-473.040 456.378  30
   3  -1 -11 380.052 383.367   1
  -3   1  11 143.573 285.228  11
   3  -1 -11 275.717 379.818   2
   3  -1 -10 1571.55 395.393   2
   3  -1  -9 810.943 348.928   2
   3  -1  -8 555.063 358.208   2
   3  -1  -7 15415.1 1629.63   2
   3  -1  -6 1072.04 387.960   2
   3  -1  -5 4663.88 556.563   2
   3  -1  -4 40601.9 4149.83   2
   3  -1  -3 6207.94 668.340   2
   3  -1  -2 24394.9 2511.85   1
   3  -1  -2 24806.8 2515.19   2
  -3   1   1 22193.9 2085.55   5
   3  -1  -1 20363.4 2082.65   2
   3  -1  -1 19503.2 2076.61   1
  -3   1   0 210874. 20949.7   5
  -3   1   0 201452. 20948.6   2
  -3   1  -1 344749. 33757.3   5
  -3   1  -1 350176. 33756.8   2
   3  -1   1 315621. 33754.2   4
  -3   1  -2 83135.5 8276.86   5
   3  -1   2 78682.6 8273.39   4
  -3   1  -2 82873.0 8277.39   3
  -3   1  -2 82234.1 8275.78   2
  -3   1  -3 47509.4 4705.12   3
  -3   1  -3 48536.5 4703.50   2
   3  -1   3 42531.9 4701.73   4
  -3   1  -3 47197.6 4705.55   5
  -3   1  -4 67134.0 6668.42   5
  -3   1  -4 65329.0 6667.71   3
  -3   1  -4 63904.6 6666.97   2
  -3   1  -5 61593.0 6264.24   3
  -3   1  -5 61220.4 6263.70   2
  -3   1  -6 84239.2 8239.92   3
  -3   1  -6 77687.3 8238.22   2
  -3   1  -7 331.388 320.483   3
  -3   1  -7 1006.33 317.970   2
  -3   1  -8 23335.4 2152.76   3
  -3   1  -8 18471.3 2148.39   2
  -3   1  -9 128.973 300.610   3
  -3   1  -9-119.789 296.166   2
  -3   1 -10 12270.5 1415.51   2
  -3   1 -10 14643.4 1418.72   3
  -3   1 -11 1237.46 358.281   2
  -3   1 -11 1227.11 348.152   3
  -3   1 -12 10023.4 1023.43   6
  -3   1 -12 9769.07 1076.33   2
  -3   1 -12 8626.95 1087.51  24
  -3   1 -13 1804.40 496.609  24
  -3   1 -13 2024.52 473.911   2
  -3   1 -14 4933.60 617.629   2
  -3   1 -14 3489.89 646.472   1
   3  -1  14 3915.25 543.617  11
   3  -1  16-161.284 274.185  11
  -3   1 -16 755.739 500.437  30
  -3   1 -17-186.979 423.251  30
  -3   1 -18-278.711 369.357  30
  -3   1 -19 83.7662 292.589  30
  -3   1 -20 102.666 193.308  30
   3   0 -19-149.115 182.961  30
  -3   0  19-49.0966 82.8632   7
   3   0 -18-26.0178 191.433  16
   3   0 -18 419.009 272.559  30
  -3   0  16-168.436 323.649  34
   3   0 -16-419.025 405.897  30
   3   0 -15 185.697 454.859  30
   3   0 -14 671.981 497.039  30
  -3   0  14 476.685 443.733  29
   3   0 -13 3058.34 510.949   1
   3   0 -13 2000.59 559.762  30
   3   0 -13 2829.00 509.852   2
   3   0 -12-424.481 425.147   1
   3   0 -12 376.181 494.084  30
   3   0 -12 630.140 419.430   2
   3   0 -11 1745.75 510.265  30
   3   0 -11 1758.15 448.889   2
  -3   0  11 1379.05 337.205  11
   3   0 -11 2642.84 448.176   1
   3   0 -10 762.096 379.574   2
   3   0 -10 883.395 373.087   1
   3   0  -9 1042.16 356.525   1
   3   0  -9 1290.57 361.711   2
   3   0  -8 3063.92 474.326   2
   3   0  -7 147.108 356.482   2
   3   0  -6 117.011 374.636   2
   3   0  -5 833.699 318.899   2
   3   0  -4 960.335 264.430   2
   3   0  -3 1741.72 276.769   2
   3   0  -3 1830.68 268.925   1
   3   0  -2 1667.29 269.983   2
   3   0  -2 1710.06 261.858   1
   3   0  -1 2452.75 313.196   1
   3   0  -1 2692.90 330.024   2
   3   0   0 5863.69 614.142   1
   3   0   1 12451.0 1353.02   4
  -3   0  -1 14144.8 1355.77   5
  -3   0  -2 102.926 155.630   5
   3   0   2 160.461 141.445   4
  -3   0  -3 5.43708 169.513   3
  -3   0  -3-48.0476 164.543   5
   3   0   3-46.5238 141.118   4
  -3   0  -4 4477.34 448.966   3
   3   0   4 3594.34 437.122   4
  -3   0  -5 9374.75 956.157   3
   3   0   5 8931.83 956.248   4
  -3   0  -6 6185.05 671.985   3
  -3   0  -7 11461.5 1210.36   3
  -3   0  -8 592.978 313.862   3
  -3   0  -9 31449.7 3229.58   3
  -3   0 -10 4547.16 558.034   3
  -3   0 -11 905.668 298.620   3
   3   0  12 1141.03 330.567  11
  -3   0 -13 1482.51 439.962  24
  -3   0 -14 1615.00 470.257   2
  -3   0 -15 926.574 441.531   2
  -3   0 -15 1005.53 474.125   1
  -3   0 -16 69.4098 497.486  30
  -3   0 -17-481.385 460.817  30
   3   0  17 175.590 278.260  11
  -3   0 -18 38.7526 387.562  30
  -3   0 -19-564.294 325.386  30
  -3   0 -20-9.07995 239.953  30
   3   1 -18 157.188 147.718  16
   3   1 -18 130.785 248.495  30
   3   1 -16 152.514 374.357  30
   3   1 -15 115.591 442.402  30
   3   1 -14 51.8915 483.780  30
   3   1 -13 617.670 442.429   1
   3   1 -13 1015.82 514.532  30
  -3  -1  13-20.1949 443.652  29
   3   1 -13 807.148 439.890   2
   3   1 -12 14830.2 1675.01  30
   3   1 -12 15959.0 1661.63   1
   3   1 -12 15336.1 1661.49   2
   3   1 -11 469.123 249.841   6
  -3  -1  11 544.196 415.100  29
   3   1 -11 349.748 405.201   2
   3   1 -11-685.441 486.657  30
   3   1 -11-47.2757 402.856   1
   3   1 -10 7666.34 913.118  30
   3   1 -10 7868.70 881.660   1
   3   1 -10 7266.28 881.646   2
   3   1  -9 990.950 365.871   2
   3   1  -9 1457.28 362.322   1
   3   1  -8 3685.21 491.067   1
   3   1  -8 2894.99 490.903   2
   3   1  -7-63.4799 356.856   1
   3   1  -7-21.5573 351.888   2
   3   1  -6 3319.94 523.034   2
   3   1  -6 3850.58 521.199   1
   3   1  -5 59.0423 305.346   1
   3   1  -5 123.396 335.077   2
   3   1  -4 16752.8 1685.64   2
   3   1  -4 15737.1 1685.35   1
   3   1  -3 647.067 231.055   2
   3   1  -3 514.970 212.624   1
   3   1  -2 120287. 12590.1   1
   3   1  -2 126984. 12590.5   2
   3   1  -1 3582.32 415.912   2
   3   1  -1 3338.75 405.007   1
   3   1   0 71183.4 7192.07   2
   3   1   0 70048.8 7190.62   1
  -3  -1  -1 25073.4 2405.69   2
   3   1   1 22440.1 2401.95   1
  -3  -1  -2 3716.81 416.058   5
  -3  -1  -2 4277.80 437.073   2
   3   1   2 3971.56 432.304   4
  -3  -1  -3 144953. 15082.6   5
   3   1   3 149296. 15085.3   4
  -3  -1  -3 152931. 15085.9   2
  -3  -1  -4 44067.5 4576.53   3
  -3  -1  -4 45145.3 4578.40   2
   3   1   4 45573.6 4578.12   4
  -3  -1  -5 123.375 165.063   3
  -3  -1  -5-41.3368 167.451   2
   3   1   5-46.3411 176.269   4
  -3  -1  -6 140861. 13810.5   2
   3   1   6 132371. 13811.5   4
  -3  -1  -6 133830. 13807.2   3
  -3  -1  -7 4935.58 532.951   3
  -3  -1  -7 4191.08 535.423   2
  -3  -1  -8 26267.3 2394.16   3
  -3  -1  -8 19869.6 2396.86   2
  -3  -1  -9 20324.9 2443.80   2
  -3  -1  -9 26940.5 2443.25   3
  -3  -1 -10 1826.07 321.282   3
  -3  -1 -10 1330.00 335.165   2
  -3  -1 -11 446.528 307.290   2
  -3  -1 -12 185.679 322.669   2
  -3  -1 -13 4071.87 573.441   2
   3   1  15 21.0336 327.365  11
  -3  -1 -16 3665.09 632.805  30
  -3  -1 -17 124.499 455.608  30
   3   1  17 302.289 291.293  11
  -3  -1 -18-144.738 413.344  30
   3   1  19 109.456 216.823  11
  -3  -1 -19 97.3533 342.367  30
  -3  -1 -20 334.498 272.077  30
   3   2 -18 32.7205 208.852  30
   3   2 -17-109.602 180.098  16
   3   2 -16 165.816 237.646  16
   3   2 -16 343.152 360.259  30
   3   2 -15-121.422 422.189  30
   3   2 -14 343.465 467.732  30
   3   2 -13 1564.89 530.864  30
   3   2 -12-630.992 521.753  30
   3   2 -12-361.574 439.792   1
   3   2 -12 484.997 254.062   6
  -3  -2  11-156.745 452.154  29
   3   2 -11 1931.55 333.606  10
   3   2 -11 1964.02 310.944   6
   3   2 -11 1704.00 523.705  30
  -3  -2  11 401.862 401.818  23
   3   2 -11 2764.83 473.777   1
   3   2 -10 862.341 303.972  10
   3   2 -10 441.666 489.080  30
   3   2 -10 1142.94 406.780   1
   3   2 -10 1049.84 274.189   6
   3   2  -9 5091.32 615.341   1
   3   2  -9 4384.13 611.254   2
   3   2  -8 501.775 341.870   2
   3   2  -8 250.840 335.977   1
   3   2  -7 569.431 342.567   1
   3   2  -7 379.687 351.702   2
   3   2  -6 579.645 367.648   1
   3   2  -6 646.159 357.764   2
   3   2  -5 27914.4 2787.72   1
   3   2  -5 26102.6 2787.88   2
   3   2  -4 398.960 299.942   2
   3   2  -4 437.364 274.190   1
   3   2  -3 111.104 221.876   1
   3   2  -3-252.441 226.063   2
   3   2  -2 165.290 208.689   2
   3   2  -2-26.2033 213.283   1
   3   2  -1 392.560 212.259   1
   3   2  -1 587.028 206.517   2
   3   2   0 155.946 195.399   1
   3   2   0 267.215 198.491   2
   3   2   1 340.068 182.121   1
  -3  -2  -2 5088.27 507.969   2
  -3  -2  -2 4528.98 481.483   5
   3   2   2 4542.00 504.580   4
   3   2   3 10590.4 1143.07   4
  -3  -2  -3 11589.5 1147.32   2
  -3  -2  -4 25544.5 2556.24   2
   3   2   4 25518.9 2556.41   4
  -3  -2  -4 24277.3 2551.98   3
  -3  -2  -5 17307.8 1800.74   3
   3   2   5 17809.3 1807.64   4
  -3  -2  -5 17834.3 1806.55   2
   3   2   6 3434.16 393.070   4
  -3  -2  -6 3233.17 365.376   3
  -3  -2  -6 3036.28 387.099   2
  -3  -2  -7 2191.90 286.475   3
  -3  -2  -7 1961.84 322.579   2
   3   2   7 2044.91 337.768   4
  -3  -2  -8 3130.91 402.449   3
  -3  -2  -8 2698.02 434.296   2
  -3  -2  -9 8735.89 1154.07   2
  -3  -2  -9 12386.8 1142.82   3
  -3  -2 -10 297.077 291.612   2
  -3  -2 -11 443.458 293.699   2
  -3  -2 -12-264.665 308.075   2
  -3  -2 -13 4036.97 562.841   2
  -3  -2 -14 1813.75 437.347   2
   3   2  15 391.383 357.855  11
  -3  -2 -15 357.705 435.275   2
  -3  -2 -16 327.164 426.348   2
  -3  -2 -16-761.527 496.213  30
  -3  -2 -17 116.272 458.756  30
  -3  -2 -18 692.511 420.146  30
  -3  -2 -19-21.6826 357.390  30
   3   2  19 319.512 242.725  11
  -3  -2 -20 58.5824 289.518  30
  -3  -2 -21-155.162 192.197  30
   3   3 -18 146.796 154.904  30
   3   3 -17 411.720 259.561  30
   3   3 -16 604.766 329.108  30
   3   3 -16 110.873 199.546  16
   3   3 -15 216.364 256.561  16
   3   3 -15-141.272 402.399  30
   3   3 -14-199.691 458.063  30
   3   3 -13 19.0074 488.120  30
   3   3 -12 1859.32 478.220   2
   3   3 -12 2757.08 498.150   1
   3   3 -12 2067.46 327.037   6
   3   3 -12 1987.31 550.782  30
   3   3 -11 241.178 278.826   6
  -3  -3  11-296.288 422.461  23
   3   3 -11 284.373 437.937   1
   3   3 -11 441.646 321.042  10
   3   3 -11-550.532 435.719   2
   3   3 -10 3611.19 526.027  10
   3   3 -10 4560.99 605.393   1
   3   3 -10 4214.19 498.455   6
   3   3  -9 4962.57 653.202   1
   3   3  -9 5061.04 579.217   6
   3   3  -8 9314.17 1030.28   1
   3   3  -7 1673.81 388.299   1
   3   3  -6 23519.1 2438.03   1
   3   3  -5 3113.22 488.643   1
   3   3  -4-258.285 339.357   1
   3   3  -3 4243.11 517.447   1
   3   3  -2 27573.5 2827.83   1
   3   3  -1 6405.81 692.856   1
   3   3   0 661.368 211.074   1
   3   3   1 128754. 13117.0   1
  -3  -3  -2 329999. 33812.7   2
   3   3   2 325949. 33813.3   1
   3   3   2 341004. 33813.8   4
  -3  -3  -3 1116.34 227.061   2
   3   3   3 1157.21 217.019   4
  -3  -3  -4 328390. 33646.3   2
   3   3   4 332803. 33647.7   4
  -3  -3  -5 16814.4 1680.37   2
   3   3   5 17006.8 1681.76   4
  -3  -3  -5 15848.1 1672.40   3
   3   3   6 1280.20 244.232   4
  -3  -3  -6 1438.71 232.051   2
  -3  -3  -6 1455.20 191.730   3
  -3  -3  -7 343.602 237.354   2
  -3  -3  -7 517.663 159.360   3
   3   3   7 315.988 236.826   4
  -3  -3  -8 20035.8 1954.28   3
   3   3   8 17445.7 1978.63   4
  -3  -3  -8 18217.7 1971.74   2
  -3  -3  -9 5764.16 676.015   2
  -3  -3 -10 4041.93 518.795   2
  -3  -3 -11 12434.2 1316.05   2
  -3  -3 -12 1105.52 326.843   2
  -3  -3 -13-85.4922 341.731   2
  -3  -3 -14 9045.93 1023.40   2
   3   3  15 61.8839 347.281  11
  -3  -3 -15-268.364 429.867   2
  -3  -3 -16 4940.93 856.897  30
  -3  -3 -16 8394.57 846.458   2
  -3  -3 -17 385.304 470.968  30
  -3  -3 -18 315.511 422.207  30
   3   3  18-71.0524 308.177  11
  -3  -3 -19 677.022 366.545  30
   3   3  20-133.444 170.687  14
   3   3  20 6.42036 220.308  11
  -3  -3 -20-142.531 292.733  30
  -3  -3 -21 417.780 207.400  30
   3   4 -15-36.3978 220.711  16
   3   4 -14-219.319 270.597  16
  -3  -4  13-668.522 338.799  23
   3   4 -12 76.0602 291.952  10
  -3  -4  12 63.5674 366.673  23
   3   4 -12 381.224 270.319   6
   3   4 -11 498.338 434.788   2
   3   4 -11 561.742 447.287   1
   3   4 -11 452.951 322.194  10
   3   4 -11 266.700 278.530   6
   3   4 -10 509.908 431.724   1
   3   4 -10 207.260 285.994   6
   3   4 -10 123.278 510.778  30
   3   4 -10 177.776 335.064  10
   3   4 -10 538.305 420.007   2
   3   4  -9 814.071 394.850   2
   3   4  -9 471.404 401.435   1
   3   4  -9 335.576 274.470   6
   3   4  -9-31.2872 465.894  30
   3   4  -9 344.296 322.767  10
   3   4  -8-142.118 355.802   1
   3   4  -8 195.230 343.721   2
   3   4  -7 1686.46 396.617   1
   3   4  -7 1833.79 384.041   2
   3   4  -6 22.6945 325.260   2
   3   4  -6 220.921 335.213   1
   3   4  -5 4199.54 572.118   1
   3   4  -5 4412.34 575.727   2
   3   4  -4 4024.77 542.908   2
   3   4  -4 3481.91 531.289   1
   3   4  -3 1999.11 431.644   1
   3   4  -3 3098.52 432.257   2
   3   4  -2 81.8122 268.584   1
   3   4  -2 123.843 259.520   2
   3   4  -1-36.7686 222.048   2
   3   4  -1-26.1047 227.663   1
   3   4   0 13.1246 190.653   2
   3   4   0-97.9468 196.728   1
   3   4   1 276.958 177.992   1
  -3  -4  -2 913.703 197.093   2
   3   4   2 1012.00 211.174   1
  -3  -4  -3 12128.5 1252.10   2
  -3  -4  -4 5093.52 537.861   2
   3   4   4 4850.55 544.574   4
  -3  -4  -5 641.069 179.698   2
   3   4   5 682.148 185.323   4
   3   4   6-7.25158 185.301   4
  -3  -4  -6 133.784 179.415   2
  -3  -4  -6-42.4814 99.5111   3
   3   4   7 362.394 233.517   4
  -3  -4  -7 218.493 230.171   2
   3   4   8 3358.46 492.872   4
  -3  -4  -8 3924.86 482.743   2
   3   4   9 573.813 336.222   4
  -3  -4  -9 88.9899 314.894   2
  -3  -4 -10 1281.11 320.244   2
  -3  -4 -11 88.4582 288.877   2
  -3  -4 -12 6350.62 732.834   2
  -3  -4 -13 1340.83 368.732   2
  -3  -4 -14 103.646 368.256   2
  -3  -4 -15-592.700 411.285   2
   3   4  15 14.6675 357.550  11
  -3  -4 -16 2084.20 491.974  30
  -3  -4 -16 339.034 438.824   2
  -3  -4 -17-1065.15 472.806  30
  -3  -4 -18-85.1736 412.713  30
   3   4  18 170.075 324.675  11
  -3  -4 -19 62.0094 356.444  30
   3   4  20 28.4701 186.780  14
   3   4  20-85.8669 227.194  11
  -3  -4 -20 412.453 294.702  30
   3   4  21 169.611 136.942  14
   3   4  22-30.3266 169.857  34
   3   5 -14 605.800 386.346  30
  -3  -5  13-51.9123 329.969  23
   3   5 -13-208.297 442.780  30
   3   5 -13 908.222 269.419  16
   3   5 -12 1965.78 319.751  10
  -3  -5  12 879.661 417.198  23
   3   5 -12 1299.60 505.678  30
   3   5 -12 789.300 334.803  16
   3   5 -12 1595.41 300.506   6
   3   5 -11 216.367 446.352   1
   3   5 -11 127.656 277.374   6
   3   5 -11 177.293 415.022   2
   3   5 -11-789.952 512.833  30
   3   5 -11 133.548 322.342  10
   3   5 -10 9282.73 1047.43   2
   3   5 -10 9792.02 985.936   6
   3   5 -10 8051.89 1078.46  30
   3   5 -10 9457.29 1066.18   1
   3   5 -10 8454.98 998.645  10
   3   5  -9 1002.27 424.229   2
   3   5  -9 1320.60 310.500   6
   3   5  -9 979.389 508.209  30
   3   5  -9 1018.43 456.474   1
   3   5  -9 1247.77 364.594  10
   3   5  -8 182.016 396.495   1
   3   5  -8 222.074 368.112   2
   3   5  -8 279.430 277.954   6
   3   5  -8 235.192 450.980  30
   3   5  -8 601.135 331.839  10
   3   5  -7 3149.93 480.223   2
   3   5  -7 3245.92 496.589   1
   3   5  -6 352.727 320.183   2
   3   5  -6 528.976 332.024   1
   3   5  -5 16148.5 1727.48   1
   3   5  -5 16619.7 1720.38   2
   3   5  -4 498.297 352.637   2
   3   5  -4 594.932 366.642   1
   3   5  -3 7331.73 840.909   2
   3   5  -3 7289.73 849.122   1
   3   5  -2 4220.89 516.618   2
   3   5  -2 3113.80 539.416   3
   3   5  -2 3773.48 523.769   1
   3   5  -1 46193.6 4540.04   2
   3   5  -1 42365.3 4542.43   1
   3   5   0 48279.6 5011.84   1
   3   5   0 49715.7 5009.13   2
   3   5   1 198611. 20232.5   1
   3   5   2 98906.5 10039.5   1
   3   5   2 99099.6 10039.1   4
  -3  -5  -2 97729.1 10037.0   2
  -3  -5  -3 487618. 49654.5   2
  -3  -5  -4 8260.63 862.846   2
  -3  -5  -5 182928. 18633.0   2
   3   5   6 14.4461 70.8441   5
  -3  -5  -6-136.660 187.324   2
  -3  -5  -6 0.40142 79.5337   3
  -3  -5  -7 3758.53 429.501   2
   3   5   7 3295.81 364.842   5
   3   5   8 4822.62 536.297   5
  -3  -5  -8 5219.54 595.781   2
   3   5   8 5123.20 611.496   4
   3   5   9 1618.87 366.609   4
  -3  -5  -9 1303.55 340.400   2
  -3  -5 -10 7336.02 813.936   2
  -3  -5 -11 9830.01 1057.43   2
  -3  -5 -12 1390.40 327.714   2
  -3  -5 -13 5440.59 656.059   2
  -3  -5 -14 502.085 361.988   2
   3   5  14-234.472 248.758  12
  -3  -5 -15 4353.00 505.894   2
   3   5  15 2099.49 379.756  12
  -3  -5 -16-450.324 421.602   2
   3   5  18 503.101 335.550  11
   3   5  20 239.136 242.304  11
   3   5  20 98.3277 205.372  14
   3   5  21-270.959 164.536  14
   3   5  22-72.6787 198.536  34
   3   6 -16 94.0526 179.532  30
   3   6 -14-158.514 337.076  30
   3   6 -13-225.026 398.947  30
  -3  -6  13 28.1520 296.443  23
   3   6 -12-223.519 276.365  16
   3   6 -12-101.585 443.945  30
  -3  -6  12-745.097 385.578  23
   3   6 -12 194.223 252.816   6
   3   6 -12 378.899 273.902  10
   3   6 -11 29.1165 298.717  16
   3   6 -11 377.263 278.583   6
   3   6 -11-128.017 485.684  30
   3   6 -11 83.4328 314.889  10
   3   6 -10 1122.55 428.946   2
   3   6 -10-250.696 321.456  16
   3   6 -10 1091.52 297.930   6
   3   6 -10 220.404 506.597  30
   3   6 -10 278.908 344.886  10
   3   6  -9 2348.53 453.889   2
   3   6  -9 1053.85 346.712  16
   3   6  -9 1641.61 392.180  10
   3   6  -9 1502.20 334.382   6
   3   6  -9 885.035 513.652  30
   3   6  -8-196.064 358.892  10
   3   6  -8-162.186 475.107  30
   3   6  -8 156.204 385.401   2
   3   6  -8-255.912 281.349   6
   3   6  -8-8.08803 479.315  24
   3   6  -7 1707.85 415.369   2
   3   6  -7 2009.10 338.160   6
   3   6  -7 1725.39 481.756  24
   3   6  -7 2461.61 493.847  30
   3   6  -7 1843.19 401.857  10
   3   6  -6 762.348 334.605   2
   3   6  -5 186.940 313.907   2
   3   6  -4-252.066 328.081   2
   3   6  -3 7330.68 875.424   3
   3   6  -3 7720.59 856.679   2
   3   6  -2 532.699 342.976   2
   3   6  -1 1110.40 353.738   2
   3   6   0 3603.28 523.162   3
   3   6   0 3869.37 484.048   2
   3   6   2 180.877 189.807   4
  -3  -6  -2 134.635 192.556   2
   3   6   3 3441.43 387.708   4
  -3  -6  -3 3023.81 374.434   2
   3   6   4 1188.91 234.112   4
  -3  -6  -4 1178.03 229.248   2
   3   6   5 17111.9 1763.43   4
  -3  -6  -5 17079.4 1757.35   2
   3   6   6 6740.14 699.970   5
   3   6   6 6962.61 735.528   4
  -3  -6  -6 6636.51 727.887   2
   3   6   7 139.094 135.836   5
  -3  -6  -7 180.957 253.808   2
  -3  -6  -8 1134.78 306.479   2
   3   6   8 911.675 190.190   5
  -3  -6  -9 252.720 292.688   2
   3   6   9 184.220 177.287   5
  -3  -6 -10 1591.31 344.682   2
   3   6  10 1762.31 259.172   5
  -3  -6 -11 386.663 277.755   2
  -3  -6 -12 4185.01 526.502   2
  -3  -6 -13 571.604 322.203   2
   3   6  14 812.974 296.359  12
   3   6  14 149.113 398.911  29
   3   6  15 167.775 257.930  12
  -3  -6 -15 1012.44 392.414   2
  -3  -6 -16 721.148 414.775   2
   3   6  16-395.952 257.119  12
   3   6  17 251.378 256.991  12
   3   6  20 57.5577 217.046  14
   3   6  20 142.985 260.683  11
   3   6  21 399.108 182.829  14
   3   6  22 158.389 122.141  14
   3   6  22 284.324 217.573  34
   3   7 -15 89.8242 202.915  30
   3   7 -14-112.659 280.932  30
   3   7 -13 492.032 349.470  30
  -3  -7  13 83.5444 272.818  23
   3   7 -12-60.1572 265.986  10
  -3  -7  12-53.6835 340.247  23
   3   7 -12 71.7239 230.760   6
   3   7 -12 130.604 393.765  30
   3   7 -11-46.2426 436.581  30
   3   7 -11 618.252 269.281   6
   3   7 -11 273.127 309.477  10
   3   7 -10-210.595 336.901  10
   3   7 -10 249.684 293.983  16
   3   7 -10-134.921 285.112   6
   3   7 -10 232.442 455.722  30
   3   7  -9 94.1641 406.014   2
   3   7  -9 229.502 299.399   6
   3   7  -9 192.251 312.830  16
   3   7  -9 303.331 368.462  10
   3   7  -9 633.674 502.504  24
   3   7  -9 163.022 486.496  30
   3   7  -9 167.572 445.716   1
   3   7  -8-543.893 455.011   1
   3   7  -8-77.7990 301.852   6
   3   7  -8-159.577 503.987  24
   3   7  -8 277.844 472.647  30
   3   7  -8 183.651 378.181  10
   3   7  -8-403.857 318.075  16
   3   7  -8 44.6253 394.749   2
   3   7  -7 518.667 379.365   2
   3   7  -7 535.956 481.448  24
   3   7  -7 354.458 300.852  16
   3   7  -7 441.001 294.707   6
   3   7  -7 696.291 418.536   1
   3   7  -7 1228.89 459.897  30
   3   7  -7 257.483 369.335  10
   3   7  -6 271.755 272.210   6
   3   7  -6 288.874 360.097   2
   3   7  -6 146.558 444.764  24
   3   7  -6 321.549 344.193  10
   3   7  -5 662.140 336.965   2
   3   7  -4 4483.17 564.460   2
   3   7  -3 474.987 323.215   2
   3   7  -3 810.592 381.288   3
   3   7  -2 24069.9 2487.99   2
   3   7  -1 7049.65 875.412   3
   3   7  -1 7713.84 840.553   2
   3   7   0 4823.58 686.162   3
   3   7   0 5540.82 627.900   2
   3   7   1 8884.48 1008.44   3
   3   7   1 9122.47 974.814   4
  -3  -7  -2 856.585 239.595   2
   3   7   2 666.251 270.003   4
  -3  -7  -3 8246.80 900.458   2
   3   7   3 9008.48 915.963   4
   3   7   4 8184.62 920.900   4
  -3  -7  -4 8983.26 913.489   2
   3   7   5 140836. 13718.6   4
  -3  -7  -5 130781. 13713.2   2
   3   7   6 15077.3 1480.08   5
  -3  -7  -6 13686.5 1491.59   2
   3   7   6 13618.1 1502.10   4
   3   7   7 29610.7 3082.26   5
   3   7   7 31687.7 3105.00   4
  -3  -7  -7 30803.5 3097.30   2
   3   7   8 15467.7 1578.18   4
   3   7   8 14552.0 1541.78   5
  -3  -7  -8 16167.9 1568.91   2
   3   7   9-132.858 324.258   4
   3   7   9 67.0951 167.606   5
  -3  -7  -9 33.2464 275.447   2
  -3  -7 -10 1091.67 296.562   2
   3   7  10 1247.79 353.009   4
  -3  -7 -11 186.291 270.025   2
  -3  -7 -12 3622.38 476.876   2
  -3  -7 -13 1495.19 350.964   2
   3   7  13 1064.84 290.549  12
  -3  -7 -14-528.809 347.451   2
   3   7  14-188.216 281.603  12
   3   7  15 105.250 434.633  29
   3   7  15 447.667 274.836  12
  -3  -7 -15 443.616 376.698   2
   3   7  15 437.949 359.339  11
  -3  -7 -16 2746.74 463.258   2
   3   7  16 1355.17 353.129  12
   3   7  17 180.643 267.655  12
   3   7  18 161.179 237.801  12
   3   7  20 13.0381 219.906  14
   3   7  21 141.611 185.282  14
   3   7  22 89.3242 130.093   7
   3   7  22 214.114 142.952  14
   3   8 -14-326.827 220.803  30
  -3  -8  13 176.734 244.390  23
   3   8 -13-47.7846 294.501  30
   3   8 -12 167.101 354.765  30
   3   8 -12-100.215 235.803  10
  -3  -8  12-14.8071 318.931  23
   3   8 -11 200.507 246.418   6
   3   8 -11 536.264 406.379  30
   3   8 -11 563.654 291.022  10
   3   8 -10 568.527 325.929  10
   3   8 -10 228.573 423.132  30
   3   8 -10-393.521 273.331   6
   3   8  -9 54.7259 360.510  10
   3   8  -9 38.6228 450.625  30
   3   8  -9 291.118 297.049   6
   3   8  -9 68.0704 489.564  24
   3   8  -8-2.94761 303.893   6
   3   8  -8 89.7523 485.343  24
   3   8  -8 193.918 482.725  30
   3   8  -8 737.257 465.110   1
   3   8  -8 220.640 380.117   2
   3   8  -8 198.875 375.158  10
   3   8  -7 703.958 389.061   2
   3   8  -7 503.573 311.601  16
   3   8  -7 20.8422 474.090  30
   3   8  -7 1750.81 456.024   1
   3   8  -7 197.468 307.382   6
   3   8  -7 828.289 399.227  10
   3   8  -7 927.885 499.250  24
   3   8  -6 1866.81 384.700   2
   3   8  -6 278.133 446.637  30
   3   8  -6 1179.13 391.466  10
   3   8  -6 1266.20 437.964   1
   3   8  -6 1306.43 488.324  24
   3   8  -6 288.443 298.702  16
   3   8  -5 1214.47 360.683   2
   3   8  -5 1559.30 390.797  10
   3   8  -5 1500.02 421.955   1
   3   8  -5 1002.45 453.627  24
   3   8  -4 723.411 323.091   2
   3   8  -4 747.257 366.792   1
   3   8  -3 406.489 302.257   2
   3   8  -3 389.925 342.409   1
   3   8  -2 218.017 338.863   1
   3   8  -2 218.069 291.679   2
   3   8  -1 7265.01 816.911   2
   3   8  -1 7958.86 841.906   1
   3   8  -1 6924.44 864.738   3
   3   8   0-54.0682 289.743   4
   3   8   0 100.278 345.970   1
   3   8   0 602.605 397.058   3
   3   8   1 3115.30 462.313   1
   3   8   1 2266.41 507.537   3
   3   8   1 3048.54 426.839   4
  -3  -8  -2 761.393 265.665   2
   3   8   2 832.903 352.001   1
   3   8   2 1094.09 309.479   4
  -3  -8  -3 4071.78 522.778   2
   3   8   3 4339.59 556.832   4
   3   8   3 5273.92 578.654   1
  -3  -8  -4 570.455 245.565   2
   3   8   4 240.383 300.762   4
  -3  -8  -5 3810.54 453.372   2
   3   8   5 3509.06 483.103   4
  -3  -8  -6 5865.96 646.422   2
   3   8   6 5640.14 674.257   4
  -3  -8  -7 3738.16 484.272   2
   3   8   7 4026.42 458.418   5
   3   8   7 4129.43 522.843   4
  -3  -8  -8 2299.65 349.263   2
   3   8   8 2806.30 400.212   4
   3   8   8 1925.87 282.222   5
   3   8   9 864.748 336.926   4
  -3  -8  -9 695.279 275.373   2
  -3  -8 -10 206.576 250.856   2
   3   8  10 14.7539 321.723   4
   3   8  11 163.957 316.345   4
  -3  -8 -11-34.0895 258.642   2
  -3  -8 -12 1147.05 303.549   2
  -3  -8 -13 441.211 319.773   2
   3   8  13 185.163 268.794  12
   3   8  14 2472.02 413.930  12
   3   8  14 2708.65 443.291  11
  -3  -8 -14 2791.79 449.535   2
   3   8  15 595.734 321.920  12
  -3  -8 -15 1241.32 383.511   2
   3   8  16 255.055 307.508  12
  -3  -8 -16 1261.30 401.662   2
   3   8  17 234.950 275.772  12
   3   8  18-395.796 255.704  12
   3   8  18 490.066 334.207  11
   3   8  19 367.641 278.078  14
   3   8  20 207.168 258.896  11
   3   8  20 300.956 235.650  14
   3   8  21 286.955 194.994  14
   3   8  22 118.944 132.268   7
   3   8  22 105.421 147.493  14
   3   9 -13-333.078 217.892  30
  -3  -9  13-52.8401 187.269  23
   3   9 -12 494.049 295.732  30
  -3  -9  12 394.081 273.986  23
  -3  -9  11 514.812 363.720  23
   3   9 -11-35.7815 342.964  30
   3   9 -11 75.6125 222.101   6
   3   9 -11 152.170 254.141  10
   3   9 -10 1016.74 270.533   6
   3   9 -10 1046.60 324.105  10
   3   9 -10 579.142 402.292  30
   3   9  -9 3100.65 389.775   6
   3   9  -9 2840.19 436.199  10
   3   9  -8 568.740 449.163  30
   3   9  -8 1314.74 390.874  10
   3   9  -8 885.911 309.541   6
   3   9  -8 1000.85 489.321  24
   3   9  -7 370.301 444.257  30
   3   9  -7-59.1425 496.013  24
   3   9  -7-231.222 448.287   1
   3   9  -7 525.108 386.540  10
   3   9  -6 3041.76 661.728  30
   3   9  -6 4609.75 624.416   2
   3   9  -6 5659.12 713.184  24
   3   9  -6 5024.62 625.458  10
   3   9  -6 5716.51 683.106   1
   3   9  -5 2283.78 417.513   2
   3   9  -5 2367.64 369.864   6
   3   9  -5 1439.67 474.112   1
   3   9  -5 2265.58 524.891  24
   3   9  -5 2796.51 474.927  30
   3   9  -5 1541.19 467.450  21
   3   9  -5 2160.00 439.966  10
   3   9  -4 4000.85 523.777  10
   3   9  -4 4088.64 561.420   1
   3   9  -4 3437.93 541.006  21
   3   9  -4 3715.41 467.795   6
   3   9  -4 3190.23 502.977   2
   3   9  -4 3396.72 578.799  24
   3   9  -3 11171.7 1266.34   2
   3   9  -3 13102.2 1292.97   1
   3   9  -2 817.783 307.758   2
   3   9  -2 773.872 392.421   3
   3   9  -1 3593.11 473.128   1
   3   9  -1 2908.16 422.513   2
   3   9  -1 3084.64 431.778   4
[truncated: 1,204,595 more chars]
